# Supplementary material for: A novel, ataxic mouse model of ataxia telangiectasia caused by a clinically relevant nonsense mutation
Source: eLife journal article supplement (doi:10.7554/elife.64695), 2021-11-01
Supplement: fig4-data1 [file Figure 5-Average Frequency.xlsx]

## Sheet: AtmWt Wt; Aptx+ +
AtmWt/Wt; Aptx+/+			Total # of animals	29											AtmN/N; Aptx+/+	AtmWt/Wt; Aptx-/-	AtmN/Wt; Aptx-/-	AtmWt/Wt; Aptx+/+
Genotype	sex	sex code (1=m)	sex code (1=m)	Exp. Date_Animal ID	Average frequency	Group	Age	Age days	slice	folia	Position name	Region name	Gross Region ID	Position ID								1-5 vs 6-10
1	m	1	1	190114_1011	11.2297	GE2	1	45	3	pm	Lpm	Lateral	2	6		All time points		N	29									m					f
1	m	1	1	2	8.30312	GE2	1	45	3	pm	Lpm	Lateral	2	6		By Position ID	average	stdev	n	sem		By major regions	average	stdev	n	sem		average	stdev	n	sem		average	stdev	n	sem
1	m	1	1	3	19.0321	GE2	1	45	3	pm	Lpm	Lateral	2	6	1	Lpfl	44.3401	33.0494	19	7.58205	1	Vestibular	56.8409	38.6488	34	6.62821	1	44.9955	30.2303	16	7.55757		67.3702	42.0088	18	9.90157
1	m	1	1	4	40.0355	GE2	1	45	3	crus2	Lcrus2	Lateral	2	5	2	Lfl	72.6753	41.2423	15	10.6487	2	Lateral	68.5441	51.2604	96	5.23175	2	63.5456	48.0669	50	6.79769		73.9773	54.5881	46	8.04858
1	m	1	1	5	132.153	GE2	1	45	3	crus2	Lcrus2	Lateral	2	5	3	Lsim	64.0487	54.6076	21	11.9164	3	IntAnterior	79.3255	53.3341	26	10.4597	3	86.5308	59.2352	18	13.9619		63.1136	35.5302	8	12.5618
1	m	1	1	6	118.949	GE2	1	45	3	crus2	Lcrus2	Lateral	2	5	4	Lcrus1	63.5042	44.7697	32	7.91424	4	IntPosterior	76.6078	46.2585	103	4.55798	4	77.3685	44.3539	53	6.09247		75.8014	48.3243	50	6.83408
1	m	1	1	7	20.7807	GE2	1	45	3	crus1	Lcrus1	Lateral	2	4	5	Lcrus2	81.9943	58.8078	23	12.2623	5	MedAnterior	89.8345	42.2939	222	2.83858	5	83.9728	37.3595	100	3.73595		94.6391	45.6811	122	4.13577
1	m	1	1	8	32.8524	GE2	1	45	7	10	i10	intposterior	4	#N/A	6	Lpm	65.8605	49.197	20	11.0008	6	MedPosterior	74.6312	39.7555	278	2.38438	6	75.9168	39.6677	117	3.66728		73.6969	39.9393	161	3.14766
1	m	1	1	9	37.7414	GE2	1	45	7	10	i10	intposterior	4	#N/A	7	isim	65.7705	37.7234	21	8.23193	7
1	m	1	1	10	28.4718	GE2	1	45	7	10	i10	intposterior	4	#N/A	8	icrus1	79.9094	42.7365	19	9.80443	8
1	m	1	1	11	40.0355	GE2	1	45	7	10	i10	intposterior	4	#N/A	9	icrus2	93.1091	54.8132	21	11.9612	9
1	m	1	1	12	78.627	GE2	1	45	7	9	i9	intposterior	4	#N/A	10	ipm	75.2981	47.9505	15	12.3808	10
1	m	1	1	13	77.9142	GE2	1	45	7	9	i9	intposterior	4	#N/A	11	icop	86.4242	54.9341	13	15.236	11
1	m	1	1	14	25.2064	GE2	1	45	7	9	i9	intposterior	4	#N/A	12	i4/5	73.2006	49.6097	19	11.3812	12
1	m	1	1	15	85.9387	GE2	1	45	7	8	i8	intposterior	4	#N/A	13	m2	80.0914	33.2891	67	4.0669	13
1	m	1	1	16	64.0652	GE2	1	45	7	8	i8	intposterior	4	#N/A	14	m3	89.1608	42.2396	72	4.97798	14
1	m	1	1	17	30.3989	GE2	1	45	7	8	i8	intposterior	4	#N/A	15	m4/5	98.2838	47.7486	83	5.24109	15
1	m	1	1	18	70.0412	GE2	1	45	7	7	i7	intposterior	4	#N/A	16	m6	82.9142	37.29	61	4.7745	16
1	m	1	1	19	53.087	GE2	1	45	7	6	i6	intposterior	4	#N/A	17	m7	82.8195	51.2457	22	10.9256	17
1	m	1	1	20	128.468	GE2	1	45	7	6	i6	intposterior	4	#N/A	18	m8	92.962	37.7675	59	4.91691	18
1	m	1	1	21	50.3355	GE2	1	45	7	4/5	i4/5	IntAnterior	3	12	19	m9	78.7173	33.7277	77	3.84363	19
1	m	1	1	22	12.1216	GE2	1	45	7	3	i3	intanterior	3	#N/A	20	m10	39.3507	19.9558	59	2.59802	20
1	m	1	1	23	83.7376	GE2	1	45	9	10	m10	MedPosterior	6	20
1	m	1	1	24	45.088	GE2	1	45	9	10	m10	MedPosterior	6	20
1	m	1	1	25	69.1113	GE2	1	45	9	9	m9	MedPosterior	6	19
1	m	1	1	26	56.7261	GE2	1	45	9	8	m8	MedPosterior	6	18
1	m	1	1	27	86.8829	GE2	1	45	9	8	m8	MedPosterior	6	18
1	m	1	1	28	50.7448	GE2	1	45	9	8	m8	MedPosterior	6	18
1	m	1	1	29	37.1471	GE2	1	45	9	6	m6	MedPosterior	6	16
1	m	1	1	30	30.8431	GE2	1	45	9	6	m6	MedPosterior	6	16
1	m	1	1	31	53.2742	GE2	1	45	9	6	m6	MedPosterior	6	16
1	m	1	1	32	90.6509	GE2	1	45	9	4/5	m4/5	MedAnterior	5	15
1	m	1	1	33	117.293	GE2	1	45	9	4/5	m4/5	MedAnterior	5	15
1	m	1	1	34	133.228	GE2	1	45	9	4/5	m4/5	MedAnterior	5	15
1	m	1	1	35	87.6924	GE2	1	45	9	3	m3	MedAnterior	5	14
1	m	1	1	36	34.7429	GE2	1	45	9	3	m3	MedAnterior	5	14
1	m	1	1	37	39.274	GE2	1	45	9	2	m2	MedAnterior	5	13
1	m	1	1	38	95.4469	GE2	1	45	9	2	m2	MedAnterior	5	13
1	m	1	1	39	68.4366	GE2	1	45	9	2	m2	MedAnterior	5	13
1	m	1	2	190115_1012	5.54871	GE2	1	45	4	pm	Lpm	Lateral	2	6
1	m	1	2	2	66.3637	GE2	1	45	4	crus2	Lcrus2	Lateral	2	5		GE2	45 days	N	7									m					f
1	m	1	2	3	5.03059	GE2	1	45	4	crus1	Lcrus1	Lateral	2	4		By Position ID	average	stdev	n	sem		By major regions	average	stdev	n	sem		average	stdev	n	sem		average	stdev	n	sem
1	m	1	2	4	68.4195	GE2	1	45	4	crus1	Lcrus1	Lateral	2	4		Lpfl	156.913	#DIV/0!	1	#DIV/0!		Vestibular	156.913	#DIV/0!	1	#DIV/0!		#DIV/0!	#DIV/0!	0	#DIV/0!		156.913	#DIV/0!	1	#DIV/0!			0.190654
1	m	1	2	5	29.3667	GE2	1	45	4	crus1	Lcrus1	Lateral	2	4		Lfl	#DIV/0!	#DIV/0!	0	#DIV/0!		Lateral	58.9028	40.3679	33	7.02715		53.4734	45.7793	17	11.1031		64.6716	49.5879	16	12.397			#DIV/0!
1	m	1	2	6	137.485	GE2	1	45	4	sim	Lsim	Lateral	2	3		Lsim	48.4193	54.2039	5	24.2407		IntAnterior	84.8001	48.9867	13	13.5865		92.8179	57.3959	9	19.132		66.7601	15.7401	4	7.87005			1.39303
1	m	1	2	7	102.656	GE2	1	45	8	3	i3	intanterior	3	#N/A		Lcrus1	59.8758	50.4435	10	15.9516		IntPosterior	68.859	40.4957	41	6.32436		68.5052	40.8735	26	8.01596		69.4724	40.2579	15	10.3945			0.7449
1	m	1	2	8	113.091	GE2	1	45	8	3	i3	intanterior	3	#N/A		Lcrus2	76.0387	49.3233	10	15.5974		MedAnterior	86.7296	41.9512	59	5.46158		73.4029	28.5204	26	5.59332		97.2295	48.7811	33	8.4917			0.555417
1	m	1	2	9	149.57	GE2	1	45	8	3	i3	intanterior	3	#N/A		Lpm	42.8191	41.5263	8	14.6818		MedPosterior	69.6948	38.5537	71	4.57549		75.2751	38.2701	30	6.98713		65.6117	37.8794	41	5.91578			1.42736
1	m	1	2	10	181.194	GE2	1	45	8	3	i3	intanterior	3	#N/A		isim	67.2241	23.4886	6	9.58919																			0.718824
1	m	1	2	11	92.531	GE2	1	45	8	4/5	i4/5	IntAnterior	3	12		icrus1	54.3072	17.2085	4	8.60425																			1.19479
1	m	1	2	12	85.6253	GE2	1	45	8	4/5	i4/5	IntAnterior	3	12		icrus2	87.4944	54.8704	7	20.7391																			0.516904
1	m	1	2	13	48.2362	GE2	1	45	8	4/5	i4/5	IntAnterior	3	12		ipm	80.6487	37.0853	4	18.5427																			0.675324
1	m	1	2	14	83.1875	GE2	1	45	8	sim	isim	IntPosterior	4	7		icop	80.7876	67.11	6	27.3975																			0.65907
1	m	1	2	15	12.4395	GE2	1	45	8	crus2	icrus2	IntPosterior	4	9		i4/5	71.7919	32.0058	6	13.0663																			0.8977
1	m	1	2	16	123.353	GE2	1	45	8	crus2	icrus2	IntPosterior	4	9		m2	88.7281	38.6714	17	9.37918																			0.630323
1	m	1	2	17	30.018	GE2	1	45	8	8	i8	intposterior	4	#N/A		m3	86.4857	39.5412	17	9.59016																			0.590416
1	m	1	2	18	28.1347	GE2	1	45	11	10	m10	MedPosterior	6	20		m4/5	85.5366	45.7162	25	9.14325																			0.61493
1	m	1	2	19	40.8022	GE2	1	45	11	10	m10	MedPosterior	6	20		m6	65.5241	33.09	15	8.5438																			0.92009
1	m	1	2	20	84.0658	GE2	1	45	11	9	m9	MedPosterior	6	19		m7	104.801	72.046	5	32.22																			0.462694
1	m	1	2	21	123.076	GE2	1	45	11	9	m9	MedPosterior	6	19		m8	82.5752	39.5412	17	9.59016																			0.683426
1	m	1	2	22	72.774	GE2	1	45	11	9	m9	MedPosterior	6	19		m9	73.7049	25.9475	20	5.80204																			0.597675
1	m	1	2	23	67.8313	GE2	1	45	11	9	m9	MedPosterior	6	19		m10	40.2565	23.669	14	6.3258																			0.621723
1	m	1	2	24	55.0256	GE2	1	45	11	8	m8	MedPosterior	6	18																									#DIV/0!
1	m	1	2	25	120.824	GE2	1	45	11	8	m8	MedPosterior	6	18																									#DIV/0!
1	m	1	2	26	190.917	GE2	1	45	11	7	m7	MedPosterior	6	17																									#DIV/0!
1	m	1	2	27	25.836	GE2	1	45	11	6	m6	MedPosterior	6	16																									#DIV/0!
1	m	1	2	28	84.3624	GE2	1	45	11	6	m6	MedPosterior	6	16																									#DIV/0!
1	m	1	2	29	45.2858	GE2	1	45	11	4/5	m4/5	MedAnterior	5	15																									#DIV/0!
1	m	1	2	30	36.5434	GE2	1	45	11	4/5	m4/5	MedAnterior	5	15																									#DIV/0!
1	m	1	2	31	76.8297	GE2	1	45	11	4/5	m4/5	MedAnterior	5	15																									#DIV/0!
1	m	1	2	32	68.0688	GE2	1	45	11	4/5	m4/5	MedAnterior	5	15																									#DIV/0!
1	m	1	2	33	98.9592	GE2	1	45	11	4/5	m4/5	MedAnterior	5	15																									#DIV/0!
1	m	1	2	34	117.49	GE2	1	45	11	3	m3	MedAnterior	5	14																									#DIV/0!
1	m	1	2	35	54.9057	GE2	1	45	11	3	m3	MedAnterior	5	14																									#DIV/0!
1	m	1	2	36	94.6632	GE2	1	45	11	2	m2	MedAnterior	5	13																									#DIV/0!
1	m	1	2	37	73.4817	GE2	1	45	11	2	m2	MedAnterior	5	13																									#DIV/0!
1	m	1	2	38	90.8974	GE2	1	45	11	2	m2	MedAnterior	5	13																									#DIV/0!
1	f	0	3	190408_1373	4.92272	GE2	1	45	3	sim	Lsim	Lateral	2	3																									#DIV/0!
1	f	0	3	2	61.7198	GE2	1	45	3	sim	Lsim	Lateral	2	3																									#DIV/0!
1	f	0	3	3	29.6772	GE2	1	45	3	crus1	Lcrus1	Lateral	2	4																									#DIV/0!
1	f	0	3	4	55.561	GE2	1	45	3	crus2	Lcrus2	Lateral	2	5																									#DIV/0!
1	f	0	3	5	20.4295	GE2	1	45	3	pm	Lpm	Lateral	2	6		GE3	120 days	N	8									m	N	4			f	N	4				#VALUE!
1	f	0	3	6	44.5578	GE2	1	45	6	2	i2	intanterior	3	#N/A		By Position ID	average	stdev	n	sem		By major regions	average	stdev	n	sem		average	stdev	n	sem		average	stdev	n	sem			#VALUE!
1	f	0	3	7	68.4594	GE2	1	45	6	3	i3	intanterior	3	#N/A		Lpfl	31.3895	18.3719	2	12.9909		Vestibular	52.3734	39.7598	7	15.0278		44.1209	31.0198	5	13.8725		73.0046	65.4604	2	46.2875			0.748826
1	f	0	3	8	72.6967	GE2	1	45	6	4/5	i4/5	IntAnterior	3	12		Lfl	60.7669	43.0544	5	19.2545		Lateral	70.1915	52.4833	24	10.7131		54.5407	34.9443	13	9.6918		88.6878	66.076	11	19.9227			0.762255
1	f	0	3	9	68.6996	GE2	1	45	6	crus1	icrus1	IntPosterior	4	8		Lsim	53.4142	40.9999	6	16.7381		IntAnterior	67.8348	61.9421	6	25.2877		83.7525	73.6789	4	36.8395		35.9994	27.6105	2	19.5235			1.11487
1	f	0	3	10	77.1388	GE2	1	45	6	pm	ipm	IntPosterior	4	10		Lcrus1	70.7641	45.9859	8	16.2585		IntPosterior	81.2174	52.73	17	12.7889		83.8472	48.9264	11	14.7519		76.3961	54.8798	6	22.4046			0.394344
1	f	0	3	11	95.4777	GE2	1	45	6	pm	ipm	IntPosterior	4	10		Lcrus2	78.2769	67.9863	6	27.7553		MedAnterior	88.5052	46.114	57	6.10795		70.8811	33.438	29	6.20928		106.759	53.249	28	10.0631			0.703916
1	f	0	3	12	18.7598	GE2	1	45	6	cop	icop	IntPosterior	4	11		Lpm	82.084	65.4589	4	32.7295		MedPosterior	76.8013	39.2389	80	4.38704		71.5609	34.8184	39	5.57541		81.7861	42.9776	41	6.71198			0.862859
1	f	0	3	13	59.9277	GE2	1	45	9	2	m2	MedAnterior	5	13		isim	49.9402	42.0356	2	29.7237																			0.832049
1	f	0	3	14	86.469	GE2	1	45	9	3	m3	MedAnterior	5	14		icrus1	67.1794	47.2063	5	21.1113																			0.720564
1	f	0	3	15	118.991	GE2	1	45	9	3	m3	MedAnterior	5	14		icrus2	81.0027	58.9675	4	29.4838																			0.957237
1	f	0	3	16	29.1656	GE2	1	45	9	4/5	m4/5	MedAnterior	5	15		ipm	92.7617	61.0591	3	35.2525																			0.636806
1	f	0	3	17	64.5354	GE2	1	45	9	4/5	m4/5	MedAnterior	5	15		icop	114.207	22.51	3	12.9961																			0.245071
1	f	0	3	18	85.2443	GE2	1	45	9	4/5	m4/5	MedAnterior	5	15		i4/5	67.8348	61.9421	6	25.2877																			0.447701
1	f	0	3	19	59.8316	GE2	1	45	9	4/5	m4/5	MedAnterior	5	15		m2	73.7005	36.0131	16	9.00327																			0.585789
1	f	0	3	20	119.311	GE2	1	45	9	6	m6	MedPosterior	6	16		m3	92.0773	51.736	21	11.2897																			0.585627
1	f	0	3	21	36.6383	GE2	1	45	9	6	m6	MedPosterior	6	16		m4/5	96.5983	46.511	20	10.4002																			0.604638
1	f	0	3	22	52.2734	GE2	1	45	9	7	m7	MedPosterior	6	17		m6	79.7669	31.9988	17	7.76084																			0.638254
1	f	0	3	23	83.749	GE2	1	45	9	7	m7	MedPosterior	6	17		m7	76.6107	51.188	6	20.8974																			0.683562
1	f	0	3	24	72.742	GE2	1	45	9	8	m8	MedPosterior	6	18		m8	102.865	35.2483	19	8.08651																			0.504179
1	f	0	3	25	50.7227	GE2	1	45	9	8	m8	MedPosterior	6	18		m9	79.701	33.7254	22	7.19028																			0.527048
1	f	0	3	26	65.5089	GE2	1	45	9	9	m9	MedPosterior	6	19		m10	38.7848	19.4065	16	4.85162																			0.922937
1	f	0	3	27	56.733	GE2	1	45	9	9	m9	MedPosterior	6	19																									#DIV/0!
1	f	0	3	28	26.0322	GE2	1	45	9	10	m10	MedPosterior	6	20																									#DIV/0!
1	f	0	3	29	30.5494	GE2	1	45	9	10	m10	MedPosterior	6	20																									#DIV/0!
1	f	0	4	190416_1374	93.0629	GE2	1	45	2	pm	Lpm	Lateral	2	6																									#DIV/0!
1	f	0	4	2	98.1638	GE2	1	45	2	pm	Lpm	Lateral	2	6																									#DIV/0!
1	f	0	4	3	119.624	GE2	1	45	2	crus2	Lcrus2	Lateral	2	5																									#DIV/0!
1	f	0	4	4		GE2	1	45	2	crus2	Lcrus2	Lateral	2	5																									#DIV/0!
1	f	0	4	5		GE2	1	45	2	crus1	Lcrus1	Lateral	2	4																									#DIV/0!
1	f	0	4	6	70.5702	GE2	1	45	2	crus1	Lcrus1	Lateral	2	4																									#DIV/0!
1	f	0	4	7	105.444	GE2	1	45	2	crus1	Lcrus1	Lateral	2	4																									#DIV/0!
1	f	0	4	8	21.9762	GE2	1	45	2	sim	Lsim	Lateral	2	3																									#DIV/0!
1	f	0	4	9	156.913	GE2	1	45	2	pfl	Lpfl	Vestibular	1	1																									#DIV/0!
1	f	0	4	10	6.5249	GE2	1	45	6	cop	icop	IntPosterior	4	11																									#DIV/0!
1	f	0	4	11	120.138	GE2	1	45	6	cop	icop	IntPosterior	4	11																									#DIV/0!
1	f	0	4	12	74.0849	GE2	1	45	6	pm	ipm	IntPosterior	4	10																									#DIV/0!
1	f	0	4	13	114.576	GE2	1	45	6	crus2	icrus2	IntPosterior	4	9																									#DIV/0!
1	f	0	4	14	31.2742	GE2	1	45	6	crus1	icrus1	IntPosterior	4	8																									#DIV/0!
1	f	0	4	15	94.7523	GE2	1	45	6	sim	isim	IntPosterior	4	7																									#DIV/0!
1	f	0	4	16	16.1723	GE2	1	45	10	10	m10	MedPosterior	6	20		GE4	210 days	N	7									m	N	3			f	N	4				#VALUE!
1	f	0	4	17	41.709	GE2	1	45	10	10	m10	MedPosterior	6	20		By Position ID	average	stdev	n	sem		By major regions	average	stdev	n	sem		average	stdev	n	sem		average	stdev	n	sem			#VALUE!
1	f	0	4	18	61.5053	GE2	1	45	10	9	m9	MedPosterior	6	19		Lpfl	43.33	21.5101	8	7.60496		Vestibular	47.2408	19.2383	11	5.80057		43.8674	14.2531	4	7.12656		49.1684	22.4356	7	8.47986			0.908283
1	f	0	4	19	47.6314	GE2	1	45	10	9	m9	MedPosterior	6	19		Lfl	57.6695	2.61809	3	1.51155		Lateral	67.806	49.568	18	11.6833		65.6248	46.7583	8	16.5316		69.5509	53.2998	10	16.8549			0.444407
1	f	0	4	20	57.8682	GE2	1	45	10	9	m9	MedPosterior	6	19		Lsim	89.3262	65.411	3	37.7651		IntAnterior	77.4365	55.559	5	24.8468		77.4365	51.0809	5	22.8441		#DIV/0!	#DIV/0!	0	#DIV/0!			0.313278
1	f	0	4	21	40.66	GE2	1	45	10	9	m9	MedPosterior	6	19		Lcrus1	51.4844	32.1602	7	12.1554		IntPosterior	98.7554	53.7926	20	12.0284		97.525	54.9039	9	18.3013		99.762	51.962	11	15.6671			0.862149
1	f	0	4	22	60.9464	GE2	1	45	10	9	m9	MedPosterior	6	19		Lcrus2	73.0214	54.8087	5	24.5112		MedAnterior	90.787	37.0182	52	5.13351		97.1237	38.5008	24	7.85894		85.3555	35.9675	28	6.79721			0.834375
1	f	0	4	23	68.2602	GE2	1	45	10	8	m8	MedPosterior	6	18		Lpm	75.6769	56.2025	3	32.4486		MedPosterior	75.1038	39.8582	65	4.94381		82.8193	45.5083	26	8.92492		69.9601	35.5953	39	5.69981			0.864743
1	f	0	4	24	44.652	GE2	1	45	10	8	m8	MedPosterior	6	18		isim	95.3424	31.4925	6	12.8568																			0.597189
1	f	0	4	25	73.0754	GE2	1	45	10	8	m8	MedPosterior	6	18		icrus1	102.301	52.4071	5	23.4372																			0.32236
1	f	0	4	26	89.7801	GE2	1	45	10	8	m8	MedPosterior	6	18		icrus2	110.283	62.6483	4	31.3241																			0.430435
1	f	0	4	27		GE2	1	45	10	7	m7	MedPosterior	6	17		ipm	82.6905	67.1638	3	38.777																			0.67169
1	f	0	4	28	44.9989	GE2	1	45	10	6	m6	MedPosterior	6	16		icop	101.172	75.9626	2	53.7137																			0.38371
1	f	0	4	29	56.6338	GE2	1	45	10	6	m6	MedPosterior	6	16		i4/5	77.4365	55.559	5	24.8468																			0.330036
1	f	0	4	30	64.487	GE2	1	45	10	6	m6	MedPosterior	6	16		m2	80.0289	26.5738	17	6.44509																			0.460189
1	f	0	4	31	84.8975	GE2	1	45	10	6	m6	MedPosterior	6	16		m3	90.4445	32.9489	16	8.23722																			0.365753
1	f	0	4	32	183.242	GE2	1	45	10	4/5	m4/5	MedAnterior	5	15		m4/5	100.701	46.9915	19	10.7806																			0.452653
1	f	0	4	33	95.6255	GE2	1	45	10	4/5	m4/5	MedAnterior	5	15		m6	91.9966	38.9016	15	10.0443																			0.420102
1	f	0	4	34	67.4242	GE2	1	45	10	4/5	m4/5	MedAnterior	5	15		m7	76.1536	41.1697	6	16.8074																			0.593824
1	f	0	4	35	130.873	GE2	1	45	10	4/5	m4/5	MedAnterior	5	15		m8	88.6885	47.1974	11	14.2306																			0.388522
1	f	0	4	36		GE2	1	45	10	4/5	m4/5	MedAnterior	5	15		m9	80.6512	38.6894	18	9.11918																			0.379386
1	f	0	4	37		GE2	1	45	10	4/5	m4/5	MedAnterior	5	15		m10	41.172	15.6303	15	4.03573																			0.394785
1	f	0	4	38	39.8284	GE2	1	45	10	3	m3	MedAnterior	5	14																									#DIV/0!
1	f	0	4	39	70.2203	GE2	1	45	10	3	m3	MedAnterior	5	14																									#DIV/0!
1	f	0	4	40	179.774	GE2	1	45	10	3	m3	MedAnterior	5	14																									#DIV/0!
1	f	0	4	41	60.302	GE2	1	45	10	3	m3	MedAnterior	5	14																									#DIV/0!
1	f	0	4	42	105.093	GE2	1	45	10	3	m3	MedAnterior	5	14																									#DIV/0!
1	f	0	4	43	160.426	GE2	1	45	10	2	m2	MedAnterior	5	13																									#DIV/0!
1	f	0	4	44	65.6566	GE2	1	45	10	2	m2	MedAnterior	5	13																									#DIV/0!
1	f	0	4	45	129.766	GE2	1	45	10	2	m2	MedAnterior	5	13																									#DIV/0!
1	m	1	5	190812b_1949		GE2	1	45	3	cop	Lcop	lateral	2	#N/A																									#DIV/0!
1	m	1	5	2	86.7827	GE2	1	45	3	pm	Lpm	Lateral	2	6																									#DIV/0!
1	m	1	5	3	25.2463	GE2	1	45	3	crus2	Lcrus2	Lateral	2	5																									#DIV/0!
1	m	1	5	4	92.0211	GE2	1	45	3	crus2	Lcrus2	Lateral	2	5																									#DIV/0!
1	m	1	5	5	42.301	GE2	1	45	3	crus1	Lcrus1	Lateral	2	4																									#DIV/0!
1	m	1	5	6		GE2	1	45	6	4/5	i4/5	IntAnterior	3	12																									#DIV/0!
1	m	1	5	7	67.27	GE2	1	45	6	sim	isim	IntPosterior	4	7																									#DIV/0!
1	m	1	5	8	55.0763	GE2	1	45	6	sim	isim	IntPosterior	4	7																									#DIV/0!
1	m	1	5	9	28.0163	GE2	1	45	6	sim	isim	IntPosterior	4	7																									#DIV/0!
1	m	1	5	10	66.1577	GE2	1	45	6	crus1	icrus1	IntPosterior	4	8																									#DIV/0!
1	m	1	5	11	131.146	GE2	1	45	6	crus2	icrus2	IntPosterior	4	9																									#DIV/0!
1	m	1	5	12	115.977	GE2	1	45	6	crus2	icrus2	IntPosterior	4	9		GE1	400 days	N	7									m	N	3			f	N	4				#VALUE!
1	m	1	5	13	55.559	GE2	1	45	6	crus2	icrus2	IntPosterior	4	9		By Position ID	average	stdev	n	sem		By major regions	average	stdev	n	sem		average	stdev	n	sem		average	stdev	n	sem			#VALUE!
1	m	1	5	14	75.8934	GE2	1	45	6	pm	ipm	IntPosterior	4	10		Lpfl	34.5162	16.2125	8	5.73198		Vestibular	59.2944	41.5119	15	10.7183		46.2648	37.779	7	14.2791		70.6952	41.7584	8	14.7638			0.901091
1	m	1	5	15	184.192	GE2	1	45	6	cop	icop	IntPosterior	4	11		Lfl	87.6123	49.1412	7	18.5736		Lateral	82.4447	57.4175	21	12.5295		86.1837	60.9241	12	17.5873		77.4595	53.6892	9	17.8964			0.286933
1	m	1	5	16	72.4761	GE2	1	45	11	2	m2	MedAnterior	5	13		Lsim	73.4947	66.3876	7	25.0921		IntAnterior	82.9349	35.7067	2	25.2484		#DIV/0!	#DIV/0!	0	#DIV/0!		82.9349	35.7067	2	25.2484			#DIV/0!
1	m	1	5	17	70.3482	GE2	1	45	11	2	m2	MedAnterior	5	13		Lcrus1	72.4103	50.7192	7	19.1701		IntPosterior	68.4632	40.9714	25	8.19427		74.1936	34.5889	7	13.0734		66.2347	43.9184	18	10.3517			0.454518
1	m	1	5	18	27.43	GE2	1	45	11	2	m2	MedAnterior	5	13		Lcrus2	145.357	92.2938	2	65.2615		MedAnterior	93.7127	42.2862	54	5.75443		100.109	41.2846	21	9.00903		89.6426	43.1969	33	7.51962			0.402917
1	m	1	5	19	67.1288	GE2	1	45	11	3	m3	MedAnterior	5	14		Lpm	83.8583	30.8204	5	13.7833		MedPosterior	76.9886	42.0111	62	5.33542		76.3564	42.0542	22	8.96598		77.3363	41.8718	40	6.62052			0.575047
1	m	1	5	20	74.213	GE2	1	45	11	3	m3	MedAnterior	5	14		isim	43.7	34.146	7	12.906																			0.936281
1	m	1	5	21	61.7075	GE2	1	45	11	4/5	m4/5	MedAnterior	5	15		icrus1	90.729	35.9448	5	16.075																			0.617883
1	m	1	5	22	89.8506	GE2	1	45	11	4/5	m4/5	MedAnterior	5	15		icrus2	96.2816	47.7283	6	19.485										aa									0.532141
1	m	1	5	23	21.432	GE2	1	45	11	4/5	m4/5	MedAnterior	5	15		ipm	56.1041	26.3621	5	11.7895																			0.884707
1	m	1	5	24	46.2837	GE2	1	45	11	6	m6	MedPosterior	6	16		icop	46.9121	29.1013	2	20.5777																			0.539465
1	m	1	5	25	122.597	GE2	1	45	11	6	m6	MedPosterior	6	16		i4/5	82.9349	35.7067	2	25.2484																			0.7996
1	m	1	5	26	147.299	GE2	1	45	11	7	m7	MedPosterior	6	17		m2	77.5323	26.7381	17	6.48494																			0.628857
1	m	1	5	27	114.416	GE2	1	45	11	8	m8	MedPosterior	6	18		m3	87.1437	40.2868	18	9.4957																			0.378996
1	m	1	5	28	65.3809	GE2	1	45	11	8	m8	MedPosterior	6	18		m4/5	114.413	49.4223	19	11.3383																			0.497188
1	m	1	5	29	73.9767	GE2	1	45	11	9	m9	MedPosterior	6	19		m6	95.6371	43.7387	14	11.6897																			0.377384
1	m	1	5	30	77.8832	GE2	1	45	11	9	m9	MedPosterior	6	19		m7	76.2877	42.7056	5	19.0985																			0.974682
1	m	1	5	31	70.3581	GE2	1	45	11	9	m9	MedPosterior	6	19		m8	95.9152	25.1947	12	7.27309																			0.30655
1	m	1	5	32	99.2475	GE2	1	45	11	10	m10	MedPosterior	6	20		m9	81.2935	38.2623	17	9.27998																			0.479555
1	m	1	5	33	33.6074	GE2	1	45	11	10	m10	MedPosterior	6	20		m10	37.1401	21.9957	14	5.87859																			0.455298
1	f	0	12	191115a_2299	173.974	GE2	1	45	3	crus1	Lcrus1	Lateral	2	4																									#DIV/0!
1	f	0	12	2		GE2	1	45	3	crus2	Lcrus2	Lateral	2	5																									#DIV/0!
1	f	0	12	3	13.6879	GE2	1	45	3	crus2	Lcrus2	Lateral	2	5																									#DIV/0!
1	f	0	12	4		GE2	1	45	3	pm	Lpm	Lateral	2	6																									#DIV/0!
1	f	0	12	5	81.3264	GE2	1	45	6	4/5	i4/5	IntAnterior	3	12																									#DIV/0!
1	f	0	12	6		GE2	1	45	6	crus2	icrus2	IntPosterior	4	9																									#DIV/0!
1	f	0	12	7		GE2	1	45	6	pm	ipm	IntPosterior	4	10																									#DIV/0!
1	f	0	12	8	15.6177	GE2	1	45	12	10	m10	MedPosterior	6	20																									#DIV/0!
1	f	0	12	9	41.1657	GE2	1	45	12	10	m10	MedPosterior	6	20																									#DIV/0!
1	f	0	12	10	52.8153	GE2	1	45	12	9	m9	MedPosterior	6	19																									#DIV/0!
1	f	0	12	11	94.7224	GE2	1	45	12	9	m9	MedPosterior	6	19																									#DIV/0!
1	f	0	12	12	108.409	GE2	1	45	12	9	m9	MedPosterior	6	19																									#DIV/0!
1	f	0	12	13	195.063	GE2	1	45	12	8	m8	MedPosterior	6	18																									#DIV/0!
1	f	0	12	14	60.3801	GE2	1	45	12	8	m8	MedPosterior	6	18																									#DIV/0!
1	f	0	12	15		GE2	1	45	12	7	m7	MedPosterior	6	17																									#DIV/0!
1	f	0	12	16	119.55	GE2	1	45	12	6	m6	MedPosterior	6	16																									#DIV/0!
1	f	0	12	17	66.1347	GE2	1	45	12	4/5	m4/5	MedAnterior	5	15																									#DIV/0!
1	f	0	12	18	153.469	GE2	1	45	12	4/5	m4/5	MedAnterior	5	15																									#DIV/0!
1	f	0	12	19	91.8434	GE2	1	45	12	4/5	m4/5	MedAnterior	5	15																									#DIV/0!
1	f	0	12	20	97.8861	GE2	1	45	12	3	m3	MedAnterior	5	14																									#DIV/0!
1	f	0	12	21	152.793	GE2	1	45	12	3	m3	MedAnterior	5	14																									#DIV/0!
1	f	0	12	22	40.9671	GE2	1	45	12	3	m3	MedAnterior	5	14																									#DIV/0!
1	f	0	12	23	128.827	GE2	1	45	12	2	m2	MedAnterior	5	13																									#DIV/0!
1	f	0	12	24	169.218	GE2	1	45	12	2	m2	MedAnterior	5	13																									#DIV/0!
1	f	0	13	191115b_2300	15.993	GE2	1	45	3	sim	Lsim	Lateral	2	3																									#DIV/0!
1	f	0	13	2	53.1947	GE2	1	45	3	crus1	Lcrus1	Lateral	2	4																									#DIV/0!
1	f	0	13	3		GE2	1	45	3	crus1	Lcrus1	Lateral	2	4																									#DIV/0!
1	f	0	13	4	96.7454	GE2	1	45	3	crus2	Lcrus2	Lateral	2	5																									#DIV/0!
1	f	0	13	5		GE2	1	45	3	crus2	Lcrus2	Lateral	2	5																									#DIV/0!
1	f	0	13	6	59.4093	GE2	1	45	6	crus2	icrus2	IntPosterior	4	9																									#DIV/0!
1	f	0	13	7	75.0423	GE2	1	45	6	sim	isim	IntPosterior	4	7																									#DIV/0!
1	f	0	13	8	51.0971	GE2	1	45	6	crus1	icrus1	IntPosterior	4	8																									#DIV/0!
1	f	0	13	9		GE2	1	45	6	crus2	icrus2	IntPosterior	4	9																									#DIV/0!
1	f	0	13	10	98.7049	GE2	1	45	6	cop	icop	IntPosterior	4	11																									#DIV/0!
1	f	0	13	11	56.4065	GE2	1	45	6	cop	icop	IntPosterior	4	11																									#DIV/0!
1	f	0	13	12	79.974	GE2	1	45	12	2	m2	MedAnterior	5	13																									#DIV/0!
1	f	0	13	13	82.1275	GE2	1	45	12	2	m2	MedAnterior	5	13																									#DIV/0!
1	f	0	13	14	81.7598	GE2	1	45	12	3	m3	MedAnterior	5	14																									#DIV/0!
1	f	0	13	15	106.752	GE2	1	45	12	4/5	m4/5	MedAnterior	5	15																									#DIV/0!
1	f	0	13	16		GE2	1	45	12	4/5	m4/5	MedAnterior	5	15																									#DIV/0!
1	f	0	13	17	117.073	GE2	1	45	12	4/5	m4/5	MedAnterior	5	15																									#DIV/0!
1	f	0	13	18	47.351	GE2	1	45	12	4/5	m4/5	MedAnterior	5	15																									#DIV/0!
1	f	0	13	19	56.0011	GE2	1	45	12	6	m6	MedPosterior	6	16																									#DIV/0!
1	f	0	13	20	49.7648	GE2	1	45	12	7	m7	MedPosterior	6	17																									#DIV/0!
1	f	0	13	21	139.338	GE2	1	45	12	8	m8	MedPosterior	6	18																									#DIV/0!
1	f	0	13	22	59.7649	GE2	1	45	12	8	m8	MedPosterior	6	18																									#DIV/0!
1	f	0	13	23	141.847	GE2	1	45	12	9	m9	MedPosterior	6	19																									#DIV/0!
1	f	0	13	24	46.375	GE2	1	45	12	9	m9	MedPosterior	6	19																									#DIV/0!
1	f	0	13	25	35.0161	GE2	1	45	12	10	m10	MedPosterior	6	20																									#DIV/0!
1	f	0	13	26	26.7116	GE2	1	45	12	10	m10	MedPosterior	6	20																									#DIV/0!
1	m	1	6	190819b_1709	24.0957	GE3	2	120	2	crus2	Lcrus2	Lateral	2	5																									#DIV/0!
1	m	1	6	2	17.5745	GE3	2	120	2	crus1	Lcrus1	Lateral	2	4																									#DIV/0!
1	m	1	6	3	47.0183	GE3	2	120	2	sim	Lsim	Lateral	2	3																									#DIV/0!
1	m	1	6	4	127.253	GE3	2	120	5	cop	icop	IntPosterior	4	11																									#DIV/0!
1	m	1	6	5		GE3	2	120	5	pm	ipm	IntPosterior	4	10																									#DIV/0!
1	m	1	6	6	147.218	GE3	2	120	5	crus2	icrus2	IntPosterior	4	9																									#DIV/0!
1	m	1	6	7	70.1684	GE3	2	120	5	crus2	icrus2	IntPosterior	4	9																									#DIV/0!
1	m	1	6	8	190.331	GE3	2	120	5	4/5	i4/5	IntAnterior	3	12																									#DIV/0!
1	m	1	6	9	6.99539	GE3	2	120	12	10	m10	MedPosterior	6	20																									#DIV/0!
1	m	1	6	10	44.6949	GE3	2	120	12	10	m10	MedPosterior	6	20																									#DIV/0!
1	m	1	6	11	78.5109	GE3	2	120	12	9	m9	MedPosterior	6	19																									#DIV/0!
1	m	1	6	12	97.257	GE3	2	120	12	9	m9	MedPosterior	6	19																									#DIV/0!
1	m	1	6	13	71	GE3	2	120	12	9	m9	MedPosterior	6	19																									#DIV/0!
1	m	1	6	14	89.644	GE3	2	120	12	8	m8	MedPosterior	6	18																									#DIV/0!
1	m	1	6	15	89.7123	GE3	2	120	12	8	m8	MedPosterior	6	18																									#DIV/0!
1	m	1	6	16	114.778	GE3	2	120	12	8	m8	MedPosterior	6	18																									#DIV/0!
1	m	1	6	17	64.9122	GE3	2	120	12	7	m7	MedPosterior	6	17																									#DIV/0!
1	m	1	6	18		GE3	2	120	12	6	m6	MedPosterior	6	16																									#DIV/0!
1	m	1	6	19	101.094	GE3	2	120	12	6	m6	MedPosterior	6	16																									#DIV/0!
1	m	1	6	20	103.551	GE3	2	120	12	4/5	m4/5	MedAnterior	5	15																									#DIV/0!
1	m	1	6	21	66.7152	GE3	2	120	12	4/5	m4/5	MedAnterior	5	15																									#DIV/0!
1	m	1	6	22	77.7899	GE3	2	120	12	4/5	m4/5	MedAnterior	5	15																									#DIV/0!
1	m	1	6	23	68.6385	GE3	2	120	12	3	m3	MedAnterior	5	14																									#DIV/0!
1	m	1	6	24		GE3	2	120	12	3	m3	MedAnterior	5	14																									#DIV/0!
1	m	1	6	25	70.5603	GE3	2	120	12	3	m3	MedAnterior	5	14																									#DIV/0!
1	m	1	6	26		GE3	2	120	12	2	m2	MedAnterior	5	13																									#DIV/0!
1	m	1	6	27	83.6609	GE3	2	120	12	2	m2	MedAnterior	5	13																									#DIV/0!
1	m	1	7	190920a_1820	67.4344	GE3	2	120	3	pm	Lpm	Lateral	2	6																									#DIV/0!
1	m	1	7	2	41.8911	GE3	2	120	3	crus2	Lcrus2	Lateral	2	5																									#DIV/0!
1	m	1	7	3	39.1135	GE3	2	120	3	crus1	Lcrus1	Lateral	2	4																									#DIV/0!
1	m	1	7	4	43.4674	GE3	2	120	3	crus1	Lcrus1	Lateral	2	4																									#DIV/0!
1	m	1	7	5	28.3741	GE3	2	120	3	pfl	Lpfl	Vestibular	1	1																									#DIV/0!
1	m	1	7	6		GE3	2	120	3	pfl	Lpfl	Vestibular	1	1																									#DIV/0!
1	m	1	7	7		GE3	2	120	3				#N/A	#N/A																									#DIV/0!
1	m	1	7	8	6.96584	GE3	2	120	7	4/5	i4/5	IntAnterior	3	12																									#DIV/0!
1	m	1	7	9	62.1021	GE3	2	120	7	4/5	i4/5	IntAnterior	3	12																									#DIV/0!
1	m	1	7	10		GE3	2	120	7	4/5	i4/5	IntAnterior	3	12																									#DIV/0!
1	m	1	7	11	80.5286	GE3	2	120	7	sim	isim	IntPosterior	4	7																									#DIV/0!
1	m	1	7	12	129.639	GE3	2	120	7	crus1	icrus1	IntPosterior	4	8																									#DIV/0!
1	m	1	7	13	20.6193	GE3	2	120	7	crus1	icrus1	IntPosterior	4	8																									#DIV/0!
1	m	1	7	14	88.2149	GE3	2	120	7	cop	icop	IntPosterior	4	11																									#DIV/0!
1	m	1	7	15	52.2738	GE3	2	120	11	2	m2	MedAnterior	5	13																									#DIV/0!
1	m	1	7	16	38.3277	GE3	2	120	11	2	m2	MedAnterior	5	13																									#DIV/0!
1	m	1	7	17	66.1789	GE3	2	120	11	3	m3	MedAnterior	5	14																									#DIV/0!
1	m	1	7	18	33.5516	GE3	2	120	11	3	m3	MedAnterior	5	14																									#DIV/0!
1	m	1	7	19	90.1871	GE3	2	120	11	3	m3	MedAnterior	5	14																									#DIV/0!
1	m	1	7	20	59.5377	GE3	2	120	11	4/5	m4/5	MedAnterior	5	15
1	m	1	7	21	57.642	GE3	2	120	11	4/5	m4/5	MedAnterior	5	15
1	m	1	7	22	31.4402	GE3	2	120	11	6	m6	MedPosterior	6	16
1	m	1	7	23	37.0409	GE3	2	120	11	7	m7	MedPosterior	6	17
1	m	1	7	24	112.902	GE3	2	120	11	8	m8	MedPosterior	6	18
1	m	1	7	25	58.0324	GE3	2	120	11	8	m8	MedPosterior	6	18
1	m	1	7	26	104.321	GE3	2	120	11	9	m9	MedPosterior	6	19
1	m	1	7	27	118.186	GE3	2	120	11	9	m9	MedPosterior	6	19
1	m	1	7	28	114.08	GE3	2	120	11	9	m9	MedPosterior	6	19
1	m	1	7	29	52.0514	GE3	2	120	11	10	m10	MedPosterior	6	20
1	m	1	7	30	48.2518	GE3	2	120	11	10	m10	MedPosterior	6	20
1	m	1	8	190923a_1809		GE3	2	120	3	crus1	Lcrus1	Lateral	2	4
1	m	1	8	2		GE3	2	120	3	crus1	Lcrus1	Lateral	2	4
1	m	1	8	3	122.251	GE3	2	120	3	crus2	Lcrus2	Lateral	2	5
1	m	1	8	4	38.2914	GE3	2	120	3	fl	Lfl	Vestibular	1	2
1	m	1	8	5	17.2435	GE3	2	120	7	crus2	icrus2	IntPosterior	4	9
1	m	1	8	6	72.3357	GE3	2	120	7	crus1	icrus1	IntPosterior	4	8
1	m	1	8	7	89.3814	GE3	2	120	7	crus2	icrus2	IntPosterior	4	9
1	m	1	8	8	50.7156	GE3	2	120	11	2	m2	MedAnterior	5	13
1	m	1	8	9	45.3258	GE3	2	120	11	2	m2	MedAnterior	5	13
1	m	1	8	10	42.2671	GE3	2	120	11	3	m3	MedAnterior	5	14
1	m	1	8	11	53.0179	GE3	2	120	11	3	m3	MedAnterior	5	14
1	m	1	8	12	79.0943	GE3	2	120	11	3	m3	MedAnterior	5	14
1	m	1	8	13		GE3	2	120	11	3	m3	MedAnterior	5	14
1	m	1	8	14	90.5813	GE3	2	120	11	4/5	m4/5	MedAnterior	5	15
1	m	1	8	15	95.1019	GE3	2	120	11	4/5	m4/5	MedAnterior	5	15
1	m	1	8	16	93.0071	GE3	2	120	11	4/5	m4/5	MedAnterior	5	15
1	m	1	8	17	67.1775	GE3	2	120	11	4/5	m4/5	MedAnterior	5	15
1	m	1	8	18	73.0349	GE3	2	120	11	6	m6	MedPosterior	6	16
1	m	1	8	19	104.781	GE3	2	120	11	6	m6	MedPosterior	6	16
1	m	1	8	20	66.4735	GE3	2	120	11	7	m7	MedPosterior	6	17
1	m	1	8	21	127.232	GE3	2	120	11	8	m8	MedPosterior	6	18
1	m	1	8	22	140.875	GE3	2	120	11	8	m8	MedPosterior	6	18
1	m	1	8	23	120.43	GE3	2	120	11	9	m9	MedPosterior	6	19
1	m	1	8	24	57.3388	GE3	2	120	11	9	m9	MedPosterior	6	19
1	m	1	8	25	17.7522	GE3	2	120	11	10	m10	MedPosterior	6	20
1	m	1	8	26	22.3129	GE3	2	120	11	10	m10	MedPosterior	6	20
1	m	1	9	190923b_1818	62.5491	GE3	2	120	3	sim	Lsim	Lateral	2	3
1	m	1	9	2		GE3	2	120	3	sim	Lsim	Lateral	2	3
1	m	1	9	3	70.734	GE3	2	120	3	crus1	Lcrus1	Lateral	2	4
1	m	1	9	4	79.8069	GE3	2	120	3	crus2	Lcrus2	Lateral	2	5
1	m	1	9	5	12.2567	GE3	2	120	3	pm	Lpm	Lateral	2	6
1	m	1	9	6	80.8369	GE3	2	120	3	pm	Lpm	Lateral	2	6
1	m	1	9	7	34.405	GE3	2	120	3	pfl	Lpfl	Vestibular	1	1
1	m	1	9	8	25.6864	GE3	2	120	3	fl	Lfl	Vestibular	1	2
1	m	1	9	9	93.8477	GE3	2	120	3	fl	Lfl	Vestibular	1	2
1	m	1	9	10		GE3	2	120	6	pm	ipm	IntPosterior	4	10
1	m	1	9	11	79.7176	GE3	2	120	6	crus1	icrus1	IntPosterior	4	8
1	m	1	9	12		GE3	2	120	6	4/5	i4/5	IntAnterior	3	12
1	m	1	9	13	75.6107	GE3	2	120	6	4/5	i4/5	IntAnterior	3	12
1	m	1	9	14	30.373	GE3	2	120	11	10	m10	MedPosterior	6	20
1	m	1	9	15	35.9222	GE3	2	120	11	10	m10	MedPosterior	6	20
1	m	1	9	16	52.3092	GE3	2	120	11	9	m9	MedPosterior	6	19
1	m	1	9	17	66.4563	GE3	2	120	11	9	m9	MedPosterior	6	19
1	m	1	9	18	51.4703	GE3	2	120	11	9	m9	MedPosterior	6	19
1	m	1	9	19	50.1892	GE3	2	120	11	9	m9	MedPosterior	6	19
1	m	1	9	20	79.2881	GE3	2	120	11	8	m8	MedPosterior	6	18
1	m	1	9	21	47.9019	GE3	2	120	11	8	m8	MedPosterior	6	18
1	m	1	9	22	56.203	GE3	2	120	11	6	m6	MedPosterior	6	16
1	m	1	9	23	93.172	GE3	2	120	11	6	m6	MedPosterior	6	16
1	m	1	9	24	62.4547	GE3	2	120	11	6	m6	MedPosterior	6	16
1	m	1	9	25		GE3	2	120	11	4/5	m4/5	MedAnterior	5	15
1	m	1	9	26	147.818	GE3	2	120	11	4/5	m4/5	MedAnterior	5	15
1	m	1	9	27	88.8398	GE3	2	120	11	4/5	m4/5	MedAnterior	5	15
1	m	1	9	28	78.8049	GE3	2	120	11	3	m3	MedAnterior	5	14
1	m	1	9	29	110.289	GE3	2	120	11	3	m3	MedAnterior	5	14
1	m	1	9	30	58.6065	GE3	2	120	11	3	m3	MedAnterior	5	14
1	m	1	9	31	47.0013	GE3	2	120	11	2	m2	MedAnterior	5	13
1	m	1	9	32	39.29	GE3	2	120	11	2	m2	MedAnterior	5	13
1	f	0	10	191112_2117	25.4932	GE3	2	120	3	sim	Lsim	Lateral	2	3
1	f	0	10	2	16.6412	GE3	2	120	3	sim	Lsim	Lateral	2	3
1	f	0	10	3	141.053	GE3	2	120	3	crus1	Lcrus1	Lateral	2	4
1	f	0	10	4		GE3	2	120	6	crus2	icrus2	IntPosterior	4	9
1	f	0	10	5	122.393	GE3	2	120	11	2	m2	MedAnterior	5	13
1	f	0	10	6		GE3	2	120	11	2	m2	MedAnterior	5	13
1	f	0	10	7	85.9426	GE3	2	120	11	2	m2	MedAnterior	5	13
1	f	0	10	8		GE3	2	120	11	3	m3	MedAnterior	5	14
1	f	0	10	9	93.67	GE3	2	120	11	3	m3	MedAnterior	5	14
1	f	0	10	10	88.6078	GE3	2	120	11	3	m3	MedAnterior	5	14
1	f	0	10	11	107.669	GE3	2	120	11	4/5	m4/5	MedAnterior	5	15
1	f	0	10	12	178.99	GE3	2	120	11	4/5	m4/5	MedAnterior	5	15
1	f	0	10	13	74.9643	GE3	2	120	11	6	m6	MedPosterior	6	16
1	f	0	10	14	48.3601	GE3	2	120	11	6	m6	MedPosterior	6	16
1	f	0	10	15		GE3	2	120	11	7	m7	MedPosterior	6	17
1	f	0	10	16	137.801	GE3	2	120	11	8	m8	MedPosterior	6	18
1	f	0	10	17	183.73	GE3	2	120	11	8	m8	MedPosterior	6	18
1	f	0	10	18	105.45	GE3	2	120	11	8	m8	MedPosterior	6	18
1	f	0	10	19	147.418	GE3	2	120	11	9	m9	MedPosterior	6	19
1	f	0	10	20	113.319	GE3	2	120	11	9	m9	MedPosterior	6	19
1	f	0	10	21	37.4655	GE3	2	120	11	9	m9	MedPosterior	6	19
1	f	0	10	22	49.1798	GE3	2	120	11	10	m10	MedPosterior	6	20
1	f	0	10	23	8.41583	GE3	2	120	11	10	m10	MedPosterior	6	20
1	f	0	11	191114_2091	108.426	GE3	2	120	3	crus1	Lcrus1	Lateral	2	4
1	f	0	11	2		GE3	2	120	3	crus2	Lcrus2	Lateral	2	5
1	f	0	11	3	167.808	GE3	2	120	3	pm	Lpm	Lateral	2	6
1	f	0	11	4		GE3	2	120					#N/A	#N/A
1	f	0	11	5	19.3518	GE3	2	120	6	sim	isim	IntPosterior	4	7
1	f	0	11	6	54.175	GE3	2	120	6	4/5	i4/5	IntAnterior	3	12
1	f	0	11	7		GE3	2	120	6	crus1	icrus1	IntPosterior	4	8
1	f	0	11	8	78.4888	GE3	2	120	12	2	m2	MedAnterior	5	13
1	f	0	11	9	88.9458	GE3	2	120	12	2	m2	MedAnterior	5	13
1	f	0	11	10	105.266	GE3	2	120	12	2	m2	MedAnterior	5	13
1	f	0	11	11		GE3	2	120	12	3	m3	MedAnterior	5	14
1	f	0	11	12	183.662	GE3	2	120	12	3	m3	MedAnterior	5	14
1	f	0	11	13	201.077	GE3	2	120	12	3	m3	MedAnterior	5	14
1	f	0	11	14	103.09	GE3	2	120	12	4/5	m4/5	MedAnterior	5	15
1	f	0	11	15		GE3	2	120	12	4/5	m4/5	MedAnterior	5	15
1	f	0	11	16	103.749	GE3	2	120	12	4/5	m4/5	MedAnterior	5	15
1	f	0	11	17	113.794	GE3	2	120	12	6	m6	MedPosterior	6	16
1	f	0	11	18	61.3463	GE3	2	120	12	6	m6	MedPosterior	6	16
1	f	0	11	19	123.711	GE3	2	120	12	6	m6	MedPosterior	6	16
1	f	0	11	20	46.4621	GE3	2	120	12	6	m6	MedPosterior	6	16
1	f	0	11	21	121.768	GE3	2	120	12	7	m7	MedPosterior	6	17
1	f	0	11	22	137.465	GE3	2	120	12	7	m7	MedPosterior	6	17
1	f	0	11	23	53.261	GE3	2	120	12	8	m8	MedPosterior	6	18
1	f	0	11	24	98.3422	GE3	2	120	12	8	m8	MedPosterior	6	18
1	f	0	11	25	53.8245	GE3	2	120	12	9	m9	MedPosterior	6	19
1	f	0	11	26	14.1472	GE3	2	120	12	9	m9	MedPosterior	6	19
1	f	0	11	27	42.6202	GE3	2	120	12	10	m10	MedPosterior	6	20
1	f	0	11	28	31.2438	GE3	2	120	12	10	m10	MedPosterior	6	20
1	f	0	18	191204a_2152	119.292	GE3	2	120	3	Fl	LFl	Vestibular	1	2
1	f	0	16	2		GE3	2	120	7	4/5	i4/5	IntAnterior	3	12
1	f	0	16	3	91.8438	GE3	2	120	7	pm	ipm	IntPosterior	4	10
1	f	0	16			GE3	2	120	7	pm	ipm	IntPosterior	4	10
1	f	0	16		127.153	GE3	2	120	7	cop	icop	IntPosterior	4	11
1	f	0	16			GE3	2	120	12	2	m2	MedAnterior	5	13
1	f	0	16		95.5659	GE3	2	120	12	2	m2	MedAnterior	5	13
1	f	0	16		81.2518	GE3	2	120	12	2	m2	MedAnterior	5	13
1	f	0	16		114.252	GE3	2	120	12	3	m3	MedAnterior	5	14
1	f	0	16		149.894	GE3	2	120	12	3	m3	MedAnterior	5	14
1	f	0	16		68.1201	GE3	2	120	12	3	m3	MedAnterior	5	14
1	f	0	16		47.3092	GE3	2	120	12	4/5	m4/5	MedAnterior	5	15
1	f	0	16			GE3	2	120	12	4/5	m4/5	MedAnterior	5	15
1	f	0	16		103.3	GE3	2	120	12	4/5	m4/5	MedAnterior	5	15
1	f	0	16		105.082	GE3	2	120	12	6	m6	MedPosterior	6	16
1	f	0	16		97.4245	GE3	2	120	12	6	m6	MedPosterior	6	16
1	f	0	16		118.978	GE3	2	120	12	8	m8	MedPosterior	6	18
1	f	0	16		123.426	GE3	2	120	12	8	m8	MedPosterior	6	18
1	f	0	16		90.8847	GE3	2	120	12	9	m9	MedPosterior	6	19
1	f	0	16		43.0143	GE3	2	120	12	9	m9	MedPosterior	6	19
1	f	0	16		69.2619	GE3	2	120	12	10	m10	MedPosterior	6	20
1	f	0	16		36.7604	GE3	2	120	12	10	m10	MedPosterior	6	20
1	f	0	19	191206_2167	26.7172	GE3	2	120	3	Fl	LFl	Vestibular	1	2
1	f	0	19	2		GE3	2	120	3	PM	LPM	Lateral	2	6
1	f	0	19	3		GE3	2	120	3	PM	LPM	Lateral	2	6
1	f	0	19	4	13.4301	GE3	2	120	3	Crus2	LCrus2	Lateral	2	5
1	f	0	19	5	188.187	GE3	2	120	3	Crus2	LCrus2	Lateral	2	5
1	f	0	19	6	66.689	GE3	2	120	3	Crus1	LCrus1	Lateral	2	4
1	f	0	19	7	79.0555	GE3	2	120	3	Crus1	LCrus1	Lateral	2	4
1	f	0	19	8	126.015	GE3	2	120	3	Sim	LSim	Lateral	2	3
1	f	0	19	9	42.7682	GE3	2	120	3	Sim	LSim	Lateral	2	3
1	f	0	19	10	17.8238	GE3	2	120	6	4/5	i4/5	IntAnterior	3	12
1	f	0	19	11		GE3	2	120	6	Sim	iSim	IntPosterior	4	7
1	f	0	19	12	33.586	GE3	2	120	6	Crus1	iCrus1	IntPosterior	4	8
1	f	0	19	13		GE3	2	120	6	Crus2	iCrus2	IntPosterior	4	9
1	f	0	19	14	39.6824	GE3	2	120	6	PM	iPM	IntPosterior	4	10
1	f	0	19	15	146.759	GE3	2	120	6	PM	iPM	IntPosterior	4	10
1	f	0	19	16	90.2656	GE3	2	120	11	2	m2	MedAnterior	5	13
1	f	0	19	17	74.4928	GE3	2	120	11	2	m2	MedAnterior	5	13
1	f	0	19	18	85.3012	GE3	2	120	11	3	m3	MedAnterior	5	14
1	f	0	19	19	97.3065	GE3	2	120	11	3	m3	MedAnterior	5	14
1	f	0	19	20	100.536	GE3	2	120	11	3	m3	MedAnterior	5	14
1	f	0	19	21	68.4548	GE3	2	120	11	4/5	m4/5	MedAnterior	5	15
1	f	0	19	22	103.298	GE3	2	120	11	4/5	m4/5	MedAnterior	5	15
1	f	0	19	23	168.344	GE3	2	120	11	4/5	m4/5	MedAnterior	5	15
1	f	0	19	24	67.271	GE3	2	120	11	6	m6	MedPosterior	6	16
1	f	0	19	25	95.4412	GE3	2	120	11	6	m6	MedPosterior	6	16
1	f	0	19	26	32.0036	GE3	2	120	11	7	m7	MedPosterior	6	17
1	f	0	19	27		GE3	2	120	11	7	m7	MedPosterior	6	17
1	f	0	19	28	78.2001	GE3	2	120	11	8	m8	MedPosterior	6	18
1	f	0	19	29	133.152	GE3	2	120	11	8	m8	MedPosterior	6	18
1	f	0	19	30	61.7209	GE3	2	120	11	8	m8	MedPosterior	6	18
1	f	0	19	31	none	GE3	2	120						#N/A
1	f	0	19	32	76.4821	GE3	2	120	11	9	m9	MedPosterior	6	19
1	f	0	19	33	118.702	GE3	2	120	11	9	m9	MedPosterior	6	19
1	f	0	19	34	76.6169	GE3	2	120	11	9	m9	MedPosterior	6	19
1	f	0	19	35	76.4835	GE3	2	120	11	10	m10	MedPosterior	6	20
1	f	0	19	36	48.2378	GE3	2	120	11	10	m10	MedPosterior	6	20
1	f	0	14	191121a_1693		GE4	3	210	3				#N/A	#N/A
1	f	0	14	2	51.1401	GE4	3	210	3	pfl	Lpfl	Vestibular	1	1
1	f	0	14	3	52.6203	GE4	3	210	3	pfl	Lpfl	Vestibular	1	1
1	f	0	14	4		GE4	3	210	3	crus2	Lcrus2	Lateral	2	5
1	f	0	14	5	111.37	GE4	3	210	3	crus1	Lcrus1	Lateral	2	4
1	f	0	14	6	75.5023	GE4	3	210	3	pm	Lpm	Lateral	2	6
1	f	0	14	7		GE4	3	210	6	4/5	i4/5	IntAnterior	3	12
1	f	0	14	8	68.9101	GE4	3	210	6	sim	isim	IntPosterior	4	7
1	f	0	14	9	58.7738	GE4	3	210	6	crus1	icrus1	IntPosterior	4	8
1	f	0	14	10	155.621	GE4	3	210	6	crus2	icrus2	IntPosterior	4	9
1	f	0	14	11	76.7646	GE4	3	210	12	2	m2	MedAnterior	5	13
1	f	0	14	12	81.2245	GE4	3	210	12	2	m2	MedAnterior	5	13
1	f	0	14	13	65.1105	GE4	3	210	12	3	m3	MedAnterior	5	14
1	f	0	14	14	86.3881	GE4	3	210	12	3	m3	MedAnterior	5	14
1	f	0	14	15		GE4	3	210	12	4/5	m4/5	MedAnterior	5	15
1	f	0	14	16	24.1045	GE4	3	210	12	4/5	m4/5	MedAnterior	5	15
1	f	0	14	17	154.338	GE4	3	210	12	4/5	m4/5	MedAnterior	5	15
1	f	0	14	18	101.077	GE4	3	210	12	6	m6	MedPosterior	6	16
1	f	0	14	19	102.162	GE4	3	210	12	6	m6	MedPosterior	6	16
1	f	0	14	20	100.882	GE4	3	210	12	6	m6	MedPosterior	6	16
1	f	0	14	21	73.4552	GE4	3	210	12	8	m8	MedPosterior	6	18
1	f	0	14	22	69.1559	GE4	3	210	12	8	m8	MedPosterior	6	18
1	f	0	14	23	150.534	GE4	3	210	12	9	m9	MedPosterior	6	19
1	f	0	14	24	149.754	GE4	3	210	12	9	m9	MedPosterior	6	19
1	f	0	14	25	71.5971	GE4	3	210	12	10	m10	MedPosterior	6	20
1	f	0	14	26	40.1706	GE4	3	210	12	10	m10	MedPosterior	6	20
1	f	0	15	191122b_1694	30.9035	GE4	3	210	3	pfl	Lpfl	Vestibular	1	1
1	f	0	15	2	74.3152	GE4	3	210	3	pfl	Lpfl	Vestibular	1	1
1	f	0	15	3	19.5618	GE4	3	210	3	pm	Lpm	Lateral	2	6
1	f	0	15	4		GE4	3	210	3	sim	Lsim	Lateral	2	3
1	f	0	15	5	13.259	GE4	3	210	3	crus1	Lcrus1	Lateral	2	4
1	f	0	15	6		GE4	3	210	6	pm	ipm	IntPosterior	4	10
1	f	0	15	7	108.693	GE4	3	210	6	crus2	icrus2	IntPosterior	4	9
1	f	0	15	8	86.0995	GE4	3	210	6	crus1	icrus1	IntPosterior	4	8
1	f	0	15	9	86.0449	GE4	3	210	6	sim	isim	IntPosterior	4	7
1	f	0	15	10	51.1988	GE4	3	210	12	2	m2	MedAnterior	5	13
1	f	0	15	11	71.6366	GE4	3	210	12	2	m2	MedAnterior	5	13
1	f	0	15	12	109.904	GE4	3	210	12	3	m3	MedAnterior	5	14
1	f	0	15	13	110.963	GE4	3	210	12	3	m3	MedAnterior	5	14
1	f	0	15	14	105.917	GE4	3	210	12	3	m3	MedAnterior	5	14
1	f	0	15	15	74.1226	GE4	3	210	12	4/5	m4/5	MedAnterior	5	15
1	f	0	15	16	84.5727	GE4	3	210	12	4/5	m4/5	MedAnterior	5	15
1	f	0	15	17	59.9681	GE4	3	210	12	4/5	m4/5	MedAnterior	5	15
1	f	0	15	18	70.9345	GE4	3	210	12	6	m6	MedPosterior	6	16
1	f	0	15	19	42.0677	GE4	3	210	12	6	m6	MedPosterior	6	16
1	f	0	15	20	66.7719	GE4	3	210	12	7	m7	MedPosterior	6	17
1	f	0	15	21	61.6287	GE4	3	210	12	8	m8	MedPosterior	6	18
1	f	0	15	22	55.4783	GE4	3	210	12	9	m9	MedPosterior	6	19
1	f	0	15	23	57.7474	GE4	3	210	12	9	m9	MedPosterior	6	19
1	f	0	15	24	54.2218	GE4	3	210	12	9	m9	MedPosterior	6	19
1	f	0	15	25	8.28103	GE4	3	210	12	9	m9	MedPosterior	6	19
1	f	0	15	26	23.2757	GE4	3	210	12	10	m10	MedPosterior	6	20
1	f	0	15	27	30.3452	GE4	3	210	12	10	m10	MedPosterior	6	20
1	m	1	16	191202a_1743	56.8299	GE4	3	210	2	fl	Lfl	Vestibular	1	2
1	m	1	16	2	147.294	GE4	3	210	2	crus2	Lcrus2	Lateral	2	5
1	m	1	16	3	67.4823	GE4	3	210	2	crus2	Lcrus2	Lateral	2	5
1	m	1	16	4	56.9389	GE4	3	210	6	sim	isim	IntPosterior	4	7
1	m	1	16	5		GE4	3	210	6	crus1	icrus1	IntPosterior	4	8
1	m	1	16	6	74.3969	GE4	3	210	6	crus2	icrus2	IntPosterior	4	9
1	m	1	16	7		GE4	3	210	6	crus2	icrus2	IntPosterior	4	9
1	m	1	16	8	47.4579	GE4	3	210	6	cop	icop	IntPosterior	4	11
1	m	1	16	9	67.1761	GE4	3	210	11	2	m2	MedAnterior	5	13
1	m	1	16	10	72.3403	GE4	3	210	11	2	m2	MedAnterior	5	13
1	m	1	16	11	86.2473	GE4	3	210	11	2	m2	MedAnterior	5	13
1	m	1	16	12	87.0639	GE4	3	210	11	3	m3	MedAnterior	5	14
1	m	1	16	13	120.022	GE4	3	210	11	3	m3	MedAnterior	5	14
1	m	1	16	14	121.15	GE4	3	210	11	3	m3	MedAnterior	5	14
1	m	1	16	15	107.166	GE4	3	210	11	4/5	m4/5	MedAnterior	5	15
1	m	1	16	16		GE4	3	210	11	4/5	m4/5	MedAnterior	5	15
1	m	1	16	17	89.3769	GE4	3	210	11	4/5	m4/5	MedAnterior	5	15
1	m	1	16	18	71.4037	GE4	3	210	11	6	m6	MedPosterior	6	16
1	m	1	16	19	92.4401	GE4	3	210	11	6	m6	MedPosterior	6	16
1	m	1	16	20	120.043	GE4	3	210	11	6	m6	MedPosterior	6	16
1	m	1	16	21	115.35	GE4	3	210	11	7	m7	MedPosterior	6	17
1	m	1	16	22	148.679	GE4	3	210	11	8	m8	MedPosterior	6	18				#NAME?
1	m	1	16	23	76.2161	GE4	3	210	11	9	m9	MedPosterior	6	19
1	m	1	16	24	28.1954	GE4	3	210	11	10	m10	MedPosterior	6	20
1	m	1	16	25	43.2547	GE4	3	210	11	10	m10	MedPosterior	6	20
1	m	1	16	26	27.9018	GE4	3	210	11	10	m10	MedPosterior	6	20
1	m	1	17	191202b_1741	104.846	GE4	3	210	2	sim	Lsim	Lateral	2	3
1	m	1	17	2	21.6577	GE4	3	210	2	sim	Lsim	Lateral	2	3
1	m	1	17	3	28.0359	GE4	3	210	2	crus1	Lcrus1	Lateral	2	4
1	m	1	17	4	65.4818	GE4	3	210	2	crus1	Lcrus1	Lateral	2	4
1	m	1	17	5	36.0077	GE4	3	210	2	crus2	Lcrus2	Lateral	2	5
1	m	1	17	6		GE4	3	210	2	crus2	Lcrus2	Lateral	2	5
1	m	1	17	7	107.672	GE4	3	210	6	4/5	i4/5	IntAnterior	3	12
1	m	1	17	8	19.4477	GE4	3	210	6	4/5	i4/5	IntAnterior	3	12
1	m	1	17	9	149.373	GE4	3	210	6	4/5	i4/5	IntAnterior	3	12
1	m	1	17	10	57.4775	GE4	3	210	6	4/5	i4/5	IntAnterior	3	12
1	m	1	17	11	96.6615	GE4	3	210	6	sim	isim	IntPosterior	4	7
1	m	1	17	12	114.646	GE4	3	210	6	pm	ipm	IntPosterior	4	10
1	m	1	17	13	173.351	GE4	3	210	11	2	m2	MedAnterior	5	13
1	m	1	17	14	66.4143	GE4	3	210	11	2	m2	MedAnterior	5	13
1	m	1	17	15	101.601	GE4	3	210	11	2	m2	MedAnterior	5	13
1	m	1	17	16	77.2729	GE4	3	210	11	2	m2	MedAnterior	5	13
1	m	1	17	17	69.2923	GE4	3	210	11	3	m3	MedAnterior	5	14
1	m	1	17	18	129.134	GE4	3	210	11	3	m3	MedAnterior	5	14
1	m	1	17	19		GE4	3	210	11	3	m3	MedAnterior	5	14
1	m	1	17	20	126.557	GE4	3	210	11	4/5	m4/5	MedAnterior	5	15
1	m	1	17	21	92.4506	GE4	3	210	11	4/5	m4/5	MedAnterior	5	15
1	m	1	17	22	93.634	GE4	3	210	11	4/5	m4/5	MedAnterior	5	15
1	m	1	17	23	115.529	GE4	3	210	11	6	m6	MedPosterior	6	16
1	m	1	17	24		GE4	3	210	11	6	m6	MedPosterior	6	16
1	m	1	17	25		GE4	3	210	11	7	m7	MedPosterior	6	17
1	m	1	17	26	107.422	GE4	3	210	11	7	m7	MedPosterior	6	17
1	m	1	17	27	114.593	GE4	3	210	11	8	m8	MedPosterior	6	18
1	m	1	17	28	43.987	GE4	3	210	11	8	m8	MedPosterior	6	18
1	m	1	17	29	64.4799	GE4	3	210	11	9	m9	MedPosterior	6	19
1	m	1	17	30	158.27	GE4	3	210	11	9	m9	MedPosterior	6	19
1	m	1	17	31	60.7609	GE4	3	210	11	10	m10	MedPosterior	6	20
1	m	1	17	32	53.8853	GE4	3	210	11	10	m10	MedPosterior	6	20
1	f	0	27	200127a_2035	31.904	GE4	3	210	3	crus1	Lcrus1	Lateral	2	4
1	f	0	27		8.36283	GE4	3	210	3	crus2	Lcrus2	Lateral	2	5
1	f	0	27		2.26554	GE4	3	210	6	pm	ipm	IntPosterior	4	10
1	f	0	27		151.447	GE4	3	210	6	crus1	icrus1	IntPosterior	4	8
1	f	0	27			GE4	3	210	6				#N/A	#N/A
1	f	0	27		69.9565	GE4	3	210	12	2	m2	MedAnterior	5	13
1	f	0	27		86.6478	GE4	3	210	12	2	m2	MedAnterior	5	13
1	f	0	27		74.8886	GE4	3	210	12	3	m3	MedAnterior	5	14
1	f	0	27		96.8006	GE4	3	210	12	3	m3	MedAnterior	5	14
1	f	0	27		78.4758	GE4	3	210	12	4/5	m4/5	MedAnterior	5	15
1	f	0	27		111.759	GE4	3	210	12	4/5	m4/5	MedAnterior	5	15
1	f	0	27		137.511	GE4	3	210	12	4/5	m4/5	MedAnterior	5	15
1	f	0	27		93.7915	GE4	3	210	12	6	m6	MedPosterior	6	16
1	f	0	27		70.0451	GE4	3	210	12	6	m6	MedPosterior	6	16
1	f	0	27		30.4477	GE4	3	210	12	7	m7	MedPosterior	6	17
1	f	0	27		82.0167	GE4	3	210	12	8	m8	MedPosterior	6	18
1	f	0	27		68.5811	GE4	3	210	12	8	m8	MedPosterior	6	18
1	f	0	27		82.7595	GE4	3	210	12	9	m9	MedPosterior	6	19
1	f	0	27		73.2964	GE4	3	210	12	9	m9	MedPosterior	6	19
1	f	0	27		92.7326	GE4	3	210	12	9	m9	MedPosterior	6	19
1	f	0	27		31.9298	GE4	3	210	12	10	m10	MedPosterior	6	20
1	f	0	27		27.2528	GE4	3	210	12	10	m10	MedPosterior	6	20
1	f	0	28	200127b_2018	65.8088	GE4	3	210	3	PFl	LPFl	Vestibular	1	1
1	f	0	28	2	8.78667	GE4	3	210	3	PFl	LPFl	Vestibular	1	1
1	f	0	28	3	60.6044	GE4	3	210	3	Fl	LFl	Vestibular	1	2
1	f	0	28	4	141.475	GE4	3	210	3	sim	Lsim	Lateral	2	3
1	f	0	28	5	56.1465	GE4	3	210	3	crus1	Lcrus1	Lateral	2	4
1	f	0	28	6	105.961	GE4	3	210	3	crus2	Lcrus2	Lateral	2	5
1	f	0	28	7	131.966	GE4	3	210	3	PM	LPM	Lateral	2	6
1	f	0	28	8	126.94	GE4	3	210	6	sim	isim	IntPosterior	4	7
1	f	0	28	9	121.428	GE4	3	210	6	crus1	icrus1	IntPosterior	4	8
1	f	0	28	10	131.16	GE4	3	210	6	pm	ipm	IntPosterior	4	10
1	f	0	28	11	65.2471	GE4	3	210	12	2	m2	MedAnterior	5	13
1	f	0	28	12	73.4624	GE4	3	210	12	2	m2	MedAnterior	5	13
1	f	0	28	13	39.7585	GE4	3	210	12	3	m3	MedAnterior	5	14
1	f	0	28	14	95.5131	GE4	3	210	12	3	m3	MedAnterior	5	14
1	f	0	28	15	27.1115	GE4	3	210	12	4/5	m4/5	MedAnterior	5	15
1	f	0	28	16	156.972	GE4	3	210	12	4/5	m4/5	MedAnterior	5	15
1	f	0	28	17	119.639	GE4	3	210	12	4/5	m4/5	MedAnterior	5	15
1	f	0	28	18	62.1943	GE4	3	210	12	6	m6	MedPosterior	6	16
1	f	0	28	19	180.132	GE4	3	210	12	6	m6	MedPosterior	6	16
1	f	0	28	20	54.5113	GE4	3	210	12	7	m7	MedPosterior	6	17
1	f	0	28	21	87.7327	GE4	3	210	12	8	m8	MedPosterior	6	18
1	f	0	28	22	49.3893	GE4	3	210	12	8	m8	MedPosterior	6	18
1	f	0	28	23	77.4248	GE4	3	210	12	9	m9	MedPosterior	6	19
1	f	0	28	24	89.8698	GE4	3	210	12	9	m9	MedPosterior	6	19
1	f	0	28	25	63.9617	GE4	3	210	12	9	m9	MedPosterior	6	19
1	f	0	28	26	59.8473	GE4	3	210	12	10	m10	MedPosterior	6	20
1	f	0	28	27	20.9844	GE4	3	210	12	10	m10	MedPosterior	6	20
1	m	1	29	200221_2087	31.7406	GE4	3	210	3		LPFl	Vestibular	1	1
1	m	1	29		55.5743	GE4	3	210	3		lFl	Vestibular	1	2
1	m	1	29		31.3247	GE4	3	210	3		lPFl	Vestibular	1	1
1	m	1	29			GE4	3	210	3		lCrus2	Lateral	2	5
1	m	1	29			GE4	3	210	3		lCrus2	Lateral	2	5
1	m	1	29		54.1941	GE4	3	210	3		lCrus1	Lateral	2	4
1	m	1	29			GE4	3	210	3		lSim	Lateral	2	3
1	m	1	29		154.885	GE4	3	210	6		iCop	IntPosterior	4	11
1	m	1	29			GE4	3	210	6		iPM	IntPosterior	4	10
1	m	1	29		102.421	GE4	3	210	6		iCrus2	IntPosterior	4	9
1	m	1	29			GE4	3	210	6		iCrus2	IntPosterior	4	9
1	m	1	29		93.7591	GE4	3	210	6		iCrus1	IntPosterior	4	8
1	m	1	29		136.559	GE4	3	210	6		iSim	IntPosterior	4	7
1	m	1	29		53.2115	GE4	3	210	6		i4/5	IntAnterior	3	12
1	m	1	29		78.507	GE4	3	210	12		m2	MedAnterior	5	13
1	m	1	29		61.4422	GE4	3	210	12		m2	MedAnterior	5	13
1	m	1	29		55.7777	GE4	3	210	12		m3	MedAnterior	5	14
1	m	1	29		79.4287	GE4	3	210	12		m3	MedAnterior	5	14
1	m	1	29		124.654	GE4	3	210	12		m4/5	MedAnterior	5	15
1	m	1	29		145.165	GE4	3	210	12		m4/5	MedAnterior	5	15
1	m	1	29		105.744	GE4	3	210	12		m4/5	MedAnterior	5	15
1	m	1	29		90.8877	GE4	3	210	12		m6	MedPosterior	6	16
1	m	1	29		66.3586	GE4	3	210	12		m6	MedPosterior	6	16
1	m	1	29		82.4185	GE4	3	210	12		m7	MedPosterior	6	17
1	m	1	29		176.354	GE4	3	210	12		m8	MedPosterior	6	18
1	m	1	29			GE4	3	210	12		m8	MedPosterior	6	18
1	m	1	29		54.917	GE4	3	210	12		m9	MedPosterior	6	19
1	m	1	29		92.7579	GE4	3	210	12		m9	MedPosterior	6	19
1	m	1	29		49.0186	GE4	3	210	12		m9	MedPosterior	6	19
1	m	1	29		49.8295	GE4	3	210	12		m10	MedPosterior	6	20
1	m	1	29		48.349	GE4	3	210	12		m10	MedPosterior	6	20
1	m	1	20	191217a_940	85.6056	GE1	4	400	3	Fl	LFl	Vestibular	1	2
1	m	1	20	2	19.5522	GE1	4	400	3	PFl	LPFl	Vestibular	1	1
1	m	1	20	3	28.7165	GE1	4	400	3	Sim	LSim	Lateral	2	3
1	m	1	20	4	109.098	GE1	4	400	3	Sim	LSim	Lateral	2	3
1	m	1	20	5	16.2105	GE1	4	400	3	Crus1	LCrus1	Lateral	2	4
1	m	1	20	6	192.398	GE1	4	400	3	Crus2	LCrus2	Lateral	2	5
1	m	1	20	7	87.9727	GE1	4	400	3	PM	LPM	Lateral	2	6
1	m	1	20	8	77.0467	GE1	4	400	3	PM	LPM	Lateral	2	6
1	m	1	20	9	76.5823	GE1	4	400	6	Sim	iSim	IntPosterior	4	7
1	m	1	20	10		GE1	4	400	12	10	m10	MedPosterior	6	20
1	m	1	20	11	19.1288	GE1	4	400	12	10	m10	MedPosterior	6	20
1	m	1	20	12	44.6403	GE1	4	400	12	9	m9	MedPosterior	6	19
1	m	1	20	13	56.1153	GE1	4	400	12	9	m9	MedPosterior	6	19
1	m	1	20	14	93.0331	GE1	4	400	12	8	m8	MedPosterior	6	18
1	m	1	20	15	101.183	GE1	4	400	12	8	m8	MedPosterior	6	18
1	m	1	20	16		GE1	4	400	12	7	m7	MedPosterior	6	17
1	m	1	20	17	133.819	GE1	4	400	12	6	m6	MedPosterior	6	16
1	m	1	20	18	47.8147	GE1	4	400	12	6	m6	MedPosterior	6	16
1	m	1	20	19	92.6465	GE1	4	400	12	4/5	m4/5	MedAnterior	5	15
1	m	1	20	20	98.8868	GE1	4	400	12	4/5	m4/5	MedAnterior	5	15
1	m	1	20	21	89.9189	GE1	4	400	12	4/5	m4/5	MedAnterior	5	15
1	m	1	20	22	104.366	GE1	4	400	12	3	m3	MedAnterior	5	14
1	m	1	20	23	31.094	GE1	4	400	12	3	m3	MedAnterior	5	14
1	m	1	20	24	116.963	GE1	4	400	12	3	m3	MedAnterior	5	14
1	m	1	20	25	60.971	GE1	4	400	12	2	m2	MedAnterior	5	13
1	m	1	20	26	104.428	GE1	4	400	12	2	m2	MedAnterior	5	13
1	m	1	21	191217b_939	23.0195	GE1	4	400	3	PFl	LPFl	Vestibular	1	1
1	m	1	21	2	26.0263	GE1	4	400	3	PFl	LPFl	Vestibular	1	1
1	m	1	21	3	10.8709	GE1	4	400	3	Fl	LFl	Vestibular	1	2
1	m	1	21	4	119.131	GE1	4	400	3	Crus1	LCrus1	Lateral	2	4
1	m	1	21	5		GE1	4	400	3	Crus1	LCrus1	Lateral	2	4
1	m	1	21	7	26.2241	GE1	4	400	6	crus2	icrus2	IntPosterior	4	9
1	m	1	21	8	116.788	GE1	4	400	6	crus1	icrus1	IntPosterior	4	8
1	m	1	21	9	53.294	GE1	4	400	6	sim	isim	IntPosterior	4	7
1	m	1	21	10	94.7724	GE1	4	400	12	2	m2	MedAnterior	5	13
1	m	1	21	11	50.0098	GE1	4	400	12	2	m2	MedAnterior	5	13
1	m	1	21	12	135.664	GE1	4	400	12	3	m3	MedAnterior	5	14
1	m	1	21	13	126.856	GE1	4	400	12	3	m3	MedAnterior	5	14
1	m	1	21	14	105.221	GE1	4	400	12	4/5	m4/5	MedAnterior	5	15
1	m	1	21	15	134.034	GE1	4	400	12	4/5	m4/5	MedAnterior	5	15
1	m	1	21	16	89.8758	GE1	4	400	12	6	m6	MedPosterior	6	16
1	m	1	21	17	61.7163	GE1	4	400	12	7	m7	MedPosterior	6	17
1	m	1	21	18		GE1	4	400	12	6	m6	MedPosterior	6	16
1	m	1	21	19	104.375	GE1	4	400	12	8	m8	MedPosterior	6	18
1	m	1	21	20	70.806	GE1	4	400	12	9	m9	MedPosterior	6	19
1	m	1	21	21		GE1	4	400	12	9	m9	MedPosterior	6	19
1	m	1	21	22	89.0847	GE1	4	400	12	9	m9	MedPosterior	6	19
1	m	1	21	23	38.7333	GE1	4	400	12	10	m10	MedPosterior	6	20
1	m	1	21	24	61.3136	GE1	4	400	12	10	m10	MedPosterior	6	20
1	m	1	22	191218a_962	106.403	GE1	4	400	3	Fl	LFl	Vestibular	1	2
1	m	1	22	2		GE1	4	400	3	Fl	LFl	Vestibular	1	2
1	m	1	22	3	52.3761	GE1	4	400	3	PFl	LPFl	Vestibular	1	1
1	m	1	22	4	181.736	GE1	4	400	3	sim	Lsim	Lateral	2	3
1	m	1	22	5	32.8491	GE1	4	400	3	sim	Lsim	Lateral	2	3
1	m	1	22	6	68.3094	GE1	4	400	3	crus1	Lcrus1	Lateral	2	4
1	m	1	22	7	22.4211	GE1	4	400	3	crus1	Lcrus1	Lateral	2	4
1	m	1	22	8	98.3149	GE1	4	400	3	crus2	Lcrus2	Lateral	2	5
1	m	1	22	9	69.3225	GE1	4	400	6	sim	isim	IntPosterior	4	7
1	m	1	22	10	121.612	GE1	4	400	6	crus2	icrus2	IntPosterior	4	9
1	m	1	22	11	55.5321	GE1	4	400	6	PM	iPM	IntPosterior	4	10
1	m	1	22	12	78.0694	GE1	4	400	12	2	m2	MedAnterior	5	13
1	m	1	22	13	122.711	GE1	4	400	12	2	m2	MedAnterior	5	13
1	m	1	22	14	78.5366	GE1	4	400	12	2	m2	MedAnterior	5	13
1	m	1	22	15	69.1066	GE1	4	400	12	3	m3	MedAnterior	5	14
1	m	1	22	16	195.015	GE1	4	400	12	3	m3	MedAnterior	5	14
1	m	1	22	17	139.992	GE1	4	400	12	4/5	m4/5	MedAnterior	5	15
1	m	1	22	18	73.0192	GE1	4	400	12	4/5	m4/5	MedAnterior	5	15
1	m	1	22	19		GE1	4	400	12	4/5	m4/5	MedAnterior	5	15
1	m	1	22	20	89.4293	GE1	4	400	12	6	m6	MedPosterior	6	16
1	m	1	22	21	123.564	GE1	4	400	12	6	m6	MedPosterior	6	16
1	m	1	22	22		GE1	4	400	12	7	m7	MedPosterior	6	17
1	m	1	22	23	79.0069	GE1	4	400	12	8	m8	MedPosterior	6	18
1	m	1	22	24	137.538	GE1	4	400	12	8	m8	MedPosterior	6	18
1	m	1	22	25	65.4874	GE1	4	400	12	9	m9	MedPosterior	6	19
1	m	1	22	26	95.7087	GE1	4	400	12	9	m9	MedPosterior	6	19
1	m	1	22	27	43.0751	GE1	4	400	12	10	m10	MedPosterior	6	20
1	m	1	22	28	34.3926	GE1	4	400	12	10	m10	MedPosterior	6	20
1	f	0	23	191230a_1010	62.3627	GE1	4	400	3	PFl	LPFl	Vestibular	1	1
1	f	0	23		33.6799	GE1	4	400	3	PFl	LPFl	Vestibular	1	1
1	f	0	23			GE1	4	400	3				#N/A	#N/A
1	f	0	23		47.4078	GE1	4	400	3	Crus1	LCrus1	Lateral	2	4
1	f	0	23			GE1	4	400	3	Crus2	LCrus2	Lateral	2	5
1	f	0	23		70.757	GE1	4	400	6	PM	iPM	IntPosterior	4	10
1	f	0	23		101.675	GE1	4	400	6	Crus1	iCrus1	IntPosterior	4	8
1	f	0	23		9.58353	GE1	4	400	6	Sim	iSim	IntPosterior	4	7
1	f	0	23		108.183	GE1	4	400	6	4/5	i4/5	IntAnterior	3	12
1	f	0	23		75.3438	GE1	4	400	12	2	m2	MedAnterior	5	13
1	f	0	23		79.8314	GE1	4	400	12	2	m2	MedAnterior	5	13
1	f	0	23		102.616	GE1	4	400	12	2	m2	MedAnterior	5	13
1	f	0	23		61.9648	GE1	4	400	12	3	m3	MedAnterior	5	14
1	f	0	23		99.0267	GE1	4	400	12	3	m3	MedAnterior	5	14
1	f	0	23		70.2167	GE1	4	400	12	3	m3	MedAnterior	5	14
1	f	0	23		54.148	GE1	4	400	12	4/5	m4/5	MedAnterior	5	15
1	f	0	23		158.168	GE1	4	400	12	4/5	m4/5	MedAnterior	5	15
1	f	0	23		93.8131	GE1	4	400	12	4/5	m4/5	MedAnterior	5	15
1	f	0	23			GE1	4	400	12				#N/A	#N/A
1	f	0	23		27.3987	GE1	4	400	12	6	m6	MedPosterior	6	16
1	f	0	23		54.7582	GE1	4	400	12	6	m6	MedPosterior	6	16
1	f	0	23		111.811	GE1	4	400	12	7	m7	MedPosterior	6	17
1	f	0	23		82.9021	GE1	4	400	12	8	m8	MedPosterior	6	18
1	f	0	23		133.144	GE1	4	400	12	8	m8	MedPosterior	6	18
1	f	0	23		90.6484	GE1	4	400	12	9	m9	MedPosterior	6	19
1	f	0	23		36.6341	GE1	4	400	12	9	m9	MedPosterior	6	19
1	f	0	23		82.8206	GE1	4	400	12	10	m10	MedPosterior	6	20
1	f	0	23		42.4786	GE1	4	400	12	10	m10	MedPosterior	6	20
1	f	0	23		59.099	GE1	4	400	12	10	m10	MedPosterior	6	20
1	f	0	24	191230b_1009	41.1202	GE1	4	400	3	PFl	LPFl	Vestibular	1	1
1	f	0	24	2	133.821	GE1	4	400	3	PM	LPM	Lateral	2	6
1	f	0	24	3	52.3828	GE1	4	400	3	PM	LPM	Lateral	2	6
1	f	0	24	4		GE1	4	400	3	Crus2	LCrus2	Lateral	2	5
1	f	0	24	5		GE1	4	400	3	Crus1	LCrus1	Lateral	2	4
1	f	0	24	6	113.63	GE1	4	400	3	Crus1	LCrus1	Lateral	2	4
1	f	0	24	7	27.2466	GE1	4	400	3	Sim	LSim	Lateral	2	3
1	f	0	24	8	129.011	GE1	4	400	3	Sim	LSim	Lateral	2	3
1	f	0	24	9	26.3343	GE1	4	400	6	cop	icop	IntPosterior	4	11
1	f	0	24	10	10.5971	GE1	4	400	6	PM	iPM	IntPosterior	4	10
1	f	0	24	11	137.57	GE1	4	400	6	Crus2	iCrus2	IntPosterior	4	9
1	f	0	24	12	4.94433	GE1	4	400	6	Sim	iSim	IntPosterior	4	7
1	f	0	24	13	66.8407	GE1	4	400	12	2	m2	MedAnterior	5	13
1	f	0	24	14	51.2306	GE1	4	400	12	2	m2	MedAnterior	5	13
1	f	0	24	15	79.6851	GE1	4	400	12	3	m3	MedAnterior	5	14
1	f	0	24	16	47.7107	GE1	4	400	12	3	m3	MedAnterior	5	14
1	f	0	24	17	82.3819	GE1	4	400	12	4/5	m4/5	MedAnterior	5	15
1	f	0	24	18	119.675	GE1	4	400	12	4/5	m4/5	MedAnterior	5	15
1	f	0	24	19	102.574	GE1	4	400	12	4/5	m4/5	MedAnterior	5	15
1	f	0	24	20	104.923	GE1	4	400	12	6	m6	MedPosterior	6	16
1	f	0	24	21	118.481	GE1	4	400	12	6	m6	MedPosterior	6	16
1	f	0	24	22		GE1	4	400	12	7	m7	MedPosterior	6	17
1	f	0	24	23	74.2371	GE1	4	400	12	7	m7	MedPosterior	6	17
1	f	0	24	24	52.9856	GE1	4	400	12	8	m8	MedPosterior	6	18
1	f	0	24	25	107.845	GE1	4	400	12	8	m8	MedPosterior	6	18
1	f	0	24	26	76.8259	GE1	4	400	12	9	m9	MedPosterior	6	19
1	f	0	24	27	168.438	GE1	4	400	12	9	m9	MedPosterior	6	19
1	f	0	24	28	93.3121	GE1	4	400	12	9	m9	MedPosterior	6	19
1	f	0	24	29	44.188	GE1	4	400	12	10	m10	MedPosterior	6	20
1	f	0	24	30	23.4231	GE1	4	400	12	10	m10	MedPosterior	6	20
1	f	0	25	200103b_969	116.35	GE1	4	400	3	Fl	LFl	Vestibular	1	2
1	f	0	25	2	131.122	GE1	4	400	3	Fl	LFl	Vestibular	1	2
1	f	0	25	3	5.80492	GE1	4	400	3	Sim	LSim	Lateral	2	3
1	f	0	25	4	119.763	GE1	4	400	3	Crus1	LCrus1	Lateral	2	4
1	f	0	25	5	68.0685	GE1	4	400	3	PM	LPM	Lateral	2	6
1	f	0	25	6	67.4898	GE1	4	400	6	Cop	iCop	IntPosterior	4	11
1	f	0	25	7	46.8286	GE1	4	400	6	Crus2	iCrus2	IntPosterior	4	9
1	f	0	25	8	119.151	GE1	4	400	6	Crus1	iCrus1	IntPosterior	4	8
1	f	0	25	9	72.0675	GE1	4	400	6	PM	iPM	IntPosterior	4	10
1	f	0	25	10	57.6865	GE1	4	400	6	4/5	i4/5	IntAnterior	3	12
1	f	0	25	11	57.9147	GE1	4	400	12	2	m2	MedAnterior	5	13
1	f	0	25	12	69.5992	GE1	4	400	12	2	m2	MedAnterior	5	13
1	f	0	25	13		GE1	4	400	12	2	m2	MedAnterior	5	13
1	f	0	25	14	64.4639	GE1	4	400	12	3	m3	MedAnterior	5	14
1	f	0	25	15	111.58	GE1	4	400	12	3	m3	MedAnterior	5	14
1	f	0	25	16	80.5474	GE1	4	400	12	3	m3	MedAnterior	5	14
1	f	0	25	17	167.923	GE1	4	400	12	4/5	m4/5	MedAnterior	5	15
1	f	0	25	18	236.225	GE1	4	400	12	4/5	m4/5	MedAnterior	5	15
1	f	0	25	19	88.4909	GE1	4	400	12	4/5	m4/5	MedAnterior	5	15
1	f	0	25	20	115.677	GE1	4	400	12	6	m6	MedPosterior	6	16
1	f	0	25	21	165.24	GE1	4	400	12	6	m6	MedPosterior	6	16
1	f	0	25	22		GE1	4	400	12	7	m7	MedPosterior	6	17
1	f	0	25	23	74.6627	GE1	4	400	12	8	m8	MedPosterior	6	18
1	f	0	25	24	102.329	GE1	4	400	12	9	m9	MedPosterior	6	19
1	f	0	25	25	136.995	GE1	4	400	12	9	m9	MedPosterior	6	19
1	f	0	25	26	72.2996	GE1	4	400	12	9	m9	MedPosterior	6	19
1	f	0	25	27	12.5495	GE1	4	400	12	10	m10	MedPosterior	6	20
1	f	0	25	28	28.017	GE1	4	400	12	10	m10	MedPosterior	6	20
1	f	0	26	200107_1018	57.5223	GE1	4	400	2	Fl	LFl	Vestibular	1	2
1	f	0	26	2	105.412	GE1	4	400	2	Fl	LFl	Vestibular	1	2
1	f	0	26	3	17.9927	GE1	4	400	2	PFl	LPFl	Vestibular	1	1
1	f	0	26	4	10.8124	GE1	4	400	6	sim	isim	IntPosterior	4	7
1	f	0	26	5	81.3608	GE1	4	400	6	sim	isim	IntPosterior	4	7
1	f	0	26	6	31.3598	GE1	4	400	6	crus1	icrus1	IntPosterior	4	8
1	f	0	26	7	84.671	GE1	4	400	6	crus1	icrus1	IntPosterior	4	8
1	f	0	26	8	134.794	GE1	4	400	6	crus2	icrus2	IntPosterior	4	9
1	f	0	26	9	110.662	GE1	4	400	6	crus2	icrus2	IntPosterior	4	9
1	f	0	26	10	71.5668	GE1	4	400	6	PM	iPM	IntPosterior	4	10
1	f	0	26	11	88.7478	GE1	4	400	12	2	m2	MedAnterior	5	13
1	f	0	26	12	58.4902	GE1	4	400	12	2	m2	MedAnterior	5	13
1	f	0	26	13	77.937	GE1	4	400	12	2	m2	MedAnterior	5	13
1	f	0	26	14	50.8972	GE1	4	400	12	3	m3	MedAnterior	5	14
1	f	0	26	15	83.3571	GE1	4	400	12	3	m3	MedAnterior	5	14
1	f	0	26	16	40.0719	GE1	4	400	12	3	m3	MedAnterior	5	14
1	f	0	26	17	147.268	GE1	4	400	12	4/5	m4/5	MedAnterior	5	15
1	f	0	26	18	129.58	GE1	4	400	12	4/5	m4/5	MedAnterior	5	15
1	f	0	26	19	59.8853	GE1	4	400	12	4/5	m4/5	MedAnterior	5	15
1	f	0	26	20	80.8494	GE1	4	400	12	6	m6	MedPosterior	6	16
1	f	0	26	21	118.452	GE1	4	400	12	6	m6	MedPosterior	6	16
1	f	0	26	22	68.6377	GE1	4	400	12	6	m6	MedPosterior	6	16
1	f	0	26	23	67.0837	GE1	4	400	12	7	m7	MedPosterior	6	17
1	f	0	26	24	66.5902	GE1	4	400	12	7	m7	MedPosterior	6	17
1	f	0	26	25	112.597	GE1	4	400	12	8	m8	MedPosterior	6	18
1	f	0	26	26	71.709	GE1	4	400	12	8	m8	MedPosterior	6	18
1	f	0	26	27	89.927	GE1	4	400	12	9	m9	MedPosterior	6	19
1	f	0	26	28	40.8748	GE1	4	400	12	9	m9	MedPosterior	6	19
1	f	0	26	29	51.863	GE1	4	400	12	9	m9	MedPosterior	6	19
1	f	0	26	30	20.8898	GE1	4	400	12	10	m10	MedPosterior	6	20
1	f	0	26	31	9.85256	GE1	4	400	12	10	m10	MedPosterior	6	20
1	f	0	12				#N/A	#N/A					#N/A	#N/A
1	m	1	21	6			#N/A	#N/A					#N/A	#N/A

## Sheet: AtmN N; Aptx- -
AtmN/N; Aptx-/-			Total # of animals	23
Genotype	sex	sex code (1=m)	sex code (1=m)	Exp. Date_Animal ID	Average frequency	Group	Age	Age days	slice	folia	Position name	Region name	Gross Region ID	Position ID								1-5 vs 6-10
2	f	0	1	190409a_1382	34.9878	GE2	1	45	3	sim	Lsim	Lateral	2	3		All time points		N	23									m					f
2	f	0	1	2		GE2	1	45	3	crus1			#N/A	#N/A		By Position ID	average	stdev	n	sem		By major regions	average	stdev	n	sem		average	stdev	n	sem		average	stdev	n	sem
2	f	0	1	3	53.9382	GE2	1	45	3	pm	Lpm	Lateral	2	6		Lpfl	28.957	19.9508	19	4.57704	1	Vestibular	28.8127	18.9712	30	3.46364	1	30.13	18.6037	24	3.79746		28.3455	21.0257	6	8.58372
2	f	0	1	4	143.49	GE2	1	45	6	4/5	i4/5	IntAnterior	3	12		Lfl	31.1827	17.7164	11	5.34168	2	Lateral	49.6859	31.2405	96	3.18847	2	49.9218	32.4535	63	4.08875		49.8276	29.224	33	5.08724
2	f	0	1	5	7.98669	GE2	1	45	6	pm	ipm	IntPosterior	4	10		Lsim	53.8537	31.6602	18	7.46237	3	IntAnterior	44.7207	32.6475	23	6.80747	3	40.9945	18.2395	13	5.05873		49.5648	45.9971	10	14.5456
2	f	0	1	6	24.9691	GE2	1	45	6	sim	isim	IntPosterior	4	7		Lcrus1	38.3797	26.0403	31	4.67698	4	IntPosterior	48.4985	28.6064	114	2.67924	4	47.2137	21.4353	74	2.4918		54.5127	38.3054	40	6.05662
2	f	0	1	7		GE2	1	45					#N/A	#N/A		Lcrus2	52.1461	30.4189	29	5.64865	5	MedAnterior	49.3827	24.5882	187	1.79807	5	47.6771	23.004	106	2.23435		51.6148	26.4989	81	2.94432
2	f	0	1	8	26.7523	GE2	1	45	9	10	m10	MedPosterior	6	20		Lpm	64.6159	35.7909	17	8.68056	6	MedPosterior	41.709	24.6426	224	1.64651	6	40.7928	24.4836	124	2.19869		44.5134	24.7881	100	2.47881
2	f	0	1	9	17.1442	GE2	1	45	9	10	m10	MedPosterior	6	20		isim	46.6276	28.037	40	4.43303	7
2	f	0	1	10	53.3233	GE2	1	45	9	10	m10	MedPosterior	6	20		icrus1	52.841	24.3304	19	5.58178	8
2	f	0	1	11	55.8984	GE2	1	45	9	9	m9	MedPosterior	6	19		icrus2	56.8294	29.6891	18	6.99778	9
2	f	0	1	12	17.1131	GE2	1	45	9	9	m9	MedPosterior	6	19		ipm	56.2273	36.3471	22	7.74924	10
2	f	0	1	13	47.7464	GE2	1	45	9	9	m9	MedPosterior	6	19		icop	36.3538	16.4134	15	4.23791	11
2	f	0	1	14	21.7809	GE2	1	45	9	8	m8	MedPosterior	6	18		i4/5	44.7207	32.6475	23	6.80747	12
2	f	0	1	15	33.3163	GE2	1	45	9	8	m8	MedPosterior	6	18		m2	47.0712	23.455	51	3.28435	13
2	f	0	1	16	96.109	GE2	1	45	9	8	m8	MedPosterior	6	18		m3	46.5596	21.522	66	2.64917	14
2	f	0	1	17	40.4752	GE2	1	45	9	7	m7	MedPosterior	6	17		m4/5	53.7287	27.6407	70	3.30369	15
2	f	0	1	18	33.3342	GE2	1	45	9	7	m7	MedPosterior	6	17		m6	51.2446	26.2309	47	3.82617	16
2	f	0	1	19	49.616	GE2	1	45	9	6	m6	MedPosterior	6	16		m7	51.008	26.3494	20	5.89191	17
2	f	0	1	20	33.4807	GE2	1	45	9	6	m6	MedPosterior	6	16		m8	49.1095	24.8218	47	3.62063	18
2	f	0	1	21	11.3488	GE2	1	45	9	6	m6	MedPosterior	6	16		m9	40.5605	23.1159	61	2.95969	19
2	f	0	1	22	58.7164	GE2	1	45	9	4/5	m4/5	MedAnterior	5	15		m10	26.5031	14.9932	49	2.14188	20
2	f	0	1	23		GE2	1	45	9	4/5			#N/A	#N/A
2	f	0	1	24	61.5314	GE2	1	45	9	4/5	m4/5	MedAnterior	5	15
2	f	0	1	25		GE2	1	45	9	4/5			#N/A	#N/A
2	f	0	1	26	60.9485	GE2	1	45	9	3	m3	MedAnterior	5	14
2	f	0	1	27	61.8402	GE2	1	45	9	3	m3	MedAnterior	5	14
2	f	0	1	28	34.5215	GE2	1	45	9	3	m3	MedAnterior	5	14
2	f	0	1	29	133.681	GE2	1	45	9	2	m2	MedAnterior	5	13
2	f	0	1	30	25.2864	GE2	1	45	9	2	m2	MedAnterior	5	13
2	f	0	1	31	85.231	GE2	1	45	9	2	m2	MedAnterior	5	13
2	f	0	2	190409b_1385	48.6082	GE2	1	45	3	crus1	Lcrus1	Lateral	2	4
2	f	0	2	2	47.3426	GE2	1	45	3	crus1	Lcrus1	Lateral	2	4
2	f	0	2	3	82.8459	GE2	1	45	3	sim	Lsim	Lateral	2	3
2	f	0	2	4	58.2834	GE2	1	45	3	sim	Lsim	Lateral	2	3
2	f	0	2	5	53.7738	GE2	1	45	6	cop	icop	IntPosterior	4	11
2	f	0	2	6	62.0288	GE2	1	45	6	cop	icop	IntPosterior	4	11
2	f	0	2	7	46.3503	GE2	1	45	6	pm	ipm	IntPosterior	4	10
2	f	0	2	8	46.0714	GE2	1	45	6	pm	ipm	IntPosterior	4	10
2	f	0	2	9	48.4996	GE2	1	45	6	pm	ipm	IntPosterior	4	10
2	f	0	2	10	120.592	GE2	1	45	6	sim	isim	IntPosterior	4	7		GE2	45 days	N	8									m					f
2	f	0	2	11	49.1994	GE2	1	45	6	sim	isim	IntPosterior	4	7		By Position ID	average	stdev	n	sem		By major regions	average	stdev	n	sem		average	stdev	n	sem		average	stdev	n	sem
2	f	0	2	12	58.3281	GE2	1	45	6	sim	isim	IntPosterior	4	7		Lpfl	29.9161	27.9478	4	13.9739		Vestibular	29.9161	27.9478	4	13.9739		44.6995	38.2808	2	27.0686		15.1328	1.90524	2	1.34721
2	f	0	2	13	17.3159	GE2	1	45	6	sim	isim	IntPosterior	4	7		Lfl	#DIV/0!	#DIV/0!	0	#DIV/0!		Lateral	50.382	31.44	35	5.31432		45.8061	32.5548	22	6.9407		58.126	29.0282	13	8.05098
2	f	0	2	14	76.4201	GE2	1	45	6	sim	isim	IntPosterior	4	7		Lsim	67.4495	34.705	7	13.1173		IntAnterior	64.4475	46.1953	8	16.3325		45.0671	17.5684	5	7.85682		96.7482	65.9371	3	38.0688
2	f	0	2	15	125.427	GE2	1	45	6	4/5	i4/5	IntAnterior	3	12		Lcrus1	44.6015	32.5151	14	8.69003		IntPosterior	52.0537	28.6062	47	4.17265		48.5956	21.6138	28	4.08462		57.15	36.6675	19	8.41209
2	f	0	2	16	21.1495	GE2	1	45	9	2	m2	MedAnterior	5	13		Lcrus2	42.2332	26.0733	10	8.24509		MedAnterior	52.8766	24.7579	71	2.93823		50.9259	22.1514	39	3.54707		55.254	27.7846	32	4.91168
2	f	0	2	17	53.7547	GE2	1	45	9	2	m2	MedAnterior	5	13		Lpm	61.1182	31.0216	4	15.5108		MedPosterior	46.4367	26.1851	88	2.79134		48.8085	28.4382	45	4.23931		43.9545	24.7255	43	3.77061
2	f	0	2	18	49.3906	GE2	1	45	9	2	m2	MedAnterior	5	13		isim	48.3223	32.1031	19	7.36495
2	f	0	2	19	34.5144	GE2	1	45	9	3	m3	MedAnterior	5	14		icrus1	64.8857	30.4548	7	11.5108
2	f	0	2	20	45.6335	GE2	1	45	9	3	m3	MedAnterior	5	14		icrus2	45.2262	27.248	7	10.2988
2	f	0	2	21	40.7152	GE2	1	45	9	3	m3	MedAnterior	5	14		ipm	54.464	28.0385	10	8.86655
2	f	0	2	22	85.6808	GE2	1	45	9	4/5	m4/5	MedAnterior	5	15		icop	53.2447	7.94228	4	3.97114
2	f	0	2	23	86.1987	GE2	1	45	9	4/5	m4/5	MedAnterior	5	15		i4/5	64.4475	46.1953	8	16.3325
2	f	0	2	24	15.6708	GE2	1	45	9	4/5	m4/5	MedAnterior	5	15		m2	55.9273	30.5175	17	7.40157
2	f	0	2	25	60.0976	GE2	1	45	9	6	m6	MedPosterior	6	16		m3	51.0626	16.9786	24	3.46575
2	f	0	2	26	100.23	GE2	1	45	9	6	m6	MedPosterior	6	16		m4/5	52.599	26.9968	30	4.92892
2	f	0	2	27	76.9918	GE2	1	45	9	8	m8	MedPosterior	6	18		m6	60.2881	30.2489	19	6.93958
2	f	0	2	28	59.3239	GE2	1	45	9	8	m8	MedPosterior	6	18		m7	48.4906	28.0768	9	9.35894
2	f	0	2	29	14.0302	GE2	1	45	9	9	m9	MedPosterior	6	19		m8	56.434	20.2086	18	4.76321
2	f	0	2	30	18.3361	GE2	1	45	9	9	m9	MedPosterior	6	19		m9	44.0516	24.29	23	5.06481
2	f	0	2	31	54.0997	GE2	1	45	9	9	m9	MedPosterior	6	19		m10	25.0284	12.0926	19	2.77422
2	f	0	2	32	69.0914	GE2	1	45	9	9	m9	MedPosterior	6	19
2	f	0	2	33	21.7834	GE2	1	45	9	10	m10	MedPosterior	6	20
2	f	0	2	34	21.4814	GE2	1	45	9	10	m10	MedPosterior	6	20
2	m	1	3	190411a_1412	52.1713	GE2	1	45	2	crus2	Lcrus2	Lateral	2	5
2	m	1	3	2	30.04	GE2	1	45	2	crus2	Lcrus2	Lateral	2	5
2	m	1	3	3	24.8622	GE2	1	45	2	crus2	Lcrus2	Lateral	2	5
2	m	1	3	4	11.2903	GE2	1	45	2	crus1	Lcrus1	Lateral	2	4
2	m	1	3	5	41.3468	GE2	1	45	2	crus1	Lcrus1	Lateral	2	4
2	m	1	3	6	39.0843	GE2	1	45	2	crus1	Lcrus1	Lateral	2	4
2	m	1	3	7	31.1748	GE2	1	45	6	4/5	i4/5	IntAnterior	3	12
2	m	1	3	8	25.6742	GE2	1	45	6	4/5	i4/5	IntAnterior	3	12
2	m	1	3	9	70.2004	GE2	1	45	6	4/5	i4/5	IntAnterior	3	12
2	m	1	3	10	13.6551	GE2	1	45	6	crus2	icrus2	IntPosterior	4	9
2	m	1	3	11	47.007	GE2	1	45	6	crus2	icrus2	IntPosterior	4	9
2	m	1	3	12	63.1373	GE2	1	45	6	crus2	icrus2	IntPosterior	4	9
2	m	1	3	13	63.9149	GE2	1	45	6	pm	ipm	IntPosterior	4	10
2	m	1	3	14	69.6851	GE2	1	45	6	pm	ipm	IntPosterior	4	10
2	m	1	3	15	17.6635	GE2	1	45	6	pm	ipm	IntPosterior	4	10
2	m	1	3	16	7.01037	GE2	1	45	9	10	m10	MedPosterior	6	20
2	m	1	3	17	27.2072	GE2	1	45	9	10	m10	MedPosterior	6	20		GE3	110 days	N	8									m	N	4			f	N	4
2	m	1	3	18	12.517	GE2	1	45	9	9	m9	MedPosterior	6	19		By Position ID	average	stdev	n	sem		By major regions	average	stdev	n	sem		average	stdev	n	sem		average	stdev	n	sem
2	m	1	3	19	20.7681	GE2	1	45	9	9	m9	MedPosterior	6	19		Lpfl	23.5053	20.8066	8	7.35625		Vestibular	29.7274	21.2196	11	6.39794		25.2853	20.7486	8	7.33573		41.5732	21.3348	3	12.3176
2	m	1	3	20	33.1695	GE2	1	45	9	9	m9	MedPosterior	6	19		Lfl	46.3199	12.9737	3	7.49034		Lateral	51.4648	33.4732	32	5.91729		56.9543	38.072	18	8.97365		44.4069	26.0964	14	6.97456
2	m	1	3	21	35.8462	GE2	1	45	9	8	m8	MedPosterior	6	18		Lsim	59.55	25.5114	6	10.415		IntAnterior	30.3697	10.7895	10	3.41193		32.7645	10.4436	3	6.0296		29.3434	11.583	7	4.37797
2	m	1	3	22	60.4351	GE2	1	45	9	8	m8	MedPosterior	6	18		Lcrus1	27.9054	6.97508	8	2.46606		IntPosterior	50.8077	33.1617	36	5.52696		51.6106	24.796	21	5.41093		49.6837	42.4755	15	10.9671
2	m	1	3	23	70.913	GE2	1	45	9	8	m8	MedPosterior	6	18		Lcrus2	55.1003	32.9624	10	10.4236		MedAnterior	52.2945	28.2401	61	3.61577		52.786	29.3034	28	5.53782		51.8775	27.7562	33	4.83173
2	m	1	3	24	24.8702	GE2	1	45	9	7	m7	MedPosterior	6	17		Lpm	70.8269	46.1023	7	17.425		MedPosterior	45.7214	23.5512	80	2.6331		41.5296	20.3028	37	3.33776		49.3283	25.7132	43	3.92123
2	m	1	3	25	80.7179	GE2	1	45	9	6	m6	MedPosterior	6	16		isim	41.5527	17.645	12	5.09368
2	m	1	3	26	12.4086	GE2	1	45	9	4/5	m4/5	MedAnterior	5	15		icrus1	48.4071	25.5775	4	12.7888
2	m	1	3	27	21.6885	GE2	1	45	9	4/5	m4/5	MedAnterior	5	15		icrus2	77.5388	38.1352	6	15.5686
2	m	1	3	28	30.5925	GE2	1	45	9	4/5	m4/5	MedAnterior	5	15		ipm	59.0712	48.2957	9	16.0986
2	m	1	3	29	46.7114	GE2	1	45	9	4/5	m4/5	MedAnterior	5	15		icop	27.9888	15.0141	5	6.71451
2	m	1	3	30	14.9503	GE2	1	45	9	4/5	m4/5	MedAnterior	5	15		i4/5	30.3697	10.7895	10	3.41193
2	m	1	3	31	43.2895	GE2	1	45	9	3	m3	MedAnterior	5	14		m2	43.1729	18.9603	18	4.469
2	m	1	3	32	39.2492	GE2	1	45	9	3	m3	MedAnterior	5	14		m3	53.923	25.8243	22	5.50577
2	m	1	3	33	22.1305	GE2	1	45	9	3	m3	MedAnterior	5	14		m4/5	58.407	35.6323	21	7.77561
2	m	1	3	34	41.8466	GE2	1	45	9	3	m3	MedAnterior	5	14		m6	50.9115	24.3288	16	6.08221
2	m	1	3	35	46.9404	GE2	1	45	9	2	m2	MedAnterior	5	13		m7	52.3681	23.2318	8	8.21369
2	m	1	3	36	75.245	GE2	1	45	9	2	m2	MedAnterior	5	13		m8	51.8622	25.2752	18	5.95743
2	m	1	3	37	43.6436	GE2	1	45	9	2	m2	MedAnterior	5	13		m9	42.0063	25.3859	21	5.53965
2	m	1	3	38	34.1097	GE2	1	45	9	2	m2	MedAnterior	5	13		m10	35.796	15.7814	17	3.82755
2	m	1	4	190412a_1413	40.4223	GE2	1	45	2	pm	Lpm	Lateral	2	6
2	m	1	4	2	106.826	GE2	1	45	2	pm	Lpm	Lateral	2	6
2	m	1	4	3	12.8978	GE2	1	45	2	crus2	Lcrus2	Lateral	2	5
2	m	1	4	4	4.65377	GE2	1	45	2	crus2	Lcrus2	Lateral	2	5
2	m	1	4	5		GE2	1	45	2	crus1			#N/A	#N/A
2	m	1	4	6	75.4923	GE2	1	45	2	crus1	Lcrus1	Lateral	2	4
2	m	1	4	7	12.281	GE2	1	45	2	crus1	Lcrus1	Lateral	2	4
2	m	1	4	8	77.024	GE2	1	45	2	sim	Lsim	Lateral	2	3
2	m	1	4	9	55.2687	GE2	1	45	6	sim	isim	IntPosterior	4	7
2	m	1	4	10	47.6411	GE2	1	45	6	sim	isim	IntPosterior	4	7
2	m	1	4	11	34.7534	GE2	1	45	6	sim	isim	IntPosterior	4	7
2	m	1	4	12	31.4501	GE2	1	45	6	sim	isim	IntPosterior	4	7
2	m	1	4	13	31.4086	GE2	1	45	6	crus1	icrus1	IntPosterior	4	8
2	m	1	4	14	51.5667	GE2	1	45	6	crus1	icrus1	IntPosterior	4	8
2	m	1	4	15	78.4261	GE2	1	45	6	crus1	icrus1	IntPosterior	4	8
2	m	1	4	16	50.3933	GE2	1	45	6	crus1	icrus1	IntPosterior	4	8
2	m	1	4	17	51.1243	GE2	1	45	6	crus2	icrus2	IntPosterior	4	9
2	m	1	4	18	12.7136	GE2	1	45	9	10	m10	MedPosterior	6	20
2	m	1	4	19	36.6062	GE2	1	45	9	10	m10	MedPosterior	6	20		GE4	210 days	N	4									m	N	3			f	N	1
2	m	1	4	20	40.6308	GE2	1	45	9	10	m10	MedPosterior	6	20		By Position ID	average	stdev	n	sem		By major regions	average	stdev	n	sem		average	stdev	n	sem		average	stdev	n	sem
2	m	1	4	21	19.3915	GE2	1	45	9	9	m9	MedPosterior	6	19		Lpfl	39.3559	13.9684	3	8.06468		Vestibular	30.2044	17.3982	9	5.7994		30.2044	17.3982	9	5.7994		#DIV/0!	#DIV/0!	0	#DIV/0!
2	m	1	4	22	85.2781	GE2	1	45	9	9	m9	MedPosterior	6	19		Lfl	25.6287	18.1905	6	7.42625		Lateral	49.1038	27.522	18	6.487		47.7855	28.0976	16	7.0244		59.6509	28.0073	2	19.8041
2	m	1	4	23	49.2395	GE2	1	45	9	9	m9	MedPosterior	6	19		Lsim	27.9839	20.7641	5	9.28598		IntAnterior	25.5568	11.0424	3	6.37533		25.5568	11.0424	3	6.37533		#DIV/0!	#DIV/0!	0	#DIV/0!
2	m	1	4	24	54.5145	GE2	1	45	9	9	m9	MedPosterior	6	19		Lcrus1	44.3873	24.8148	4	12.4074		IntPosterior	46.3346	24.0198	18	5.66151		42.9414	17.1583	15	4.43025		63.3008	48.2192	3	27.8394
2	m	1	4	25	62.3232	GE2	1	45	9	8	m8	MedPosterior	6	18		Lcrus2	60.9273	19.8195	5	8.86354		MedAnterior	38.6048	17.5613	31	3.1541		37.7292	16.7528	22	3.57172		40.7453	20.3102	9	6.77006
2	m	1	4	26	39.7696	GE2	1	45	9	8	m8	MedPosterior	6	18		Lpm	65.4411	34.8705	4	17.4352		MedPosterior	30.2893	17.0121	33	2.96142		30.2371	17.1412	25	3.42824		30.4524	17.7016	8	6.25846
2	m	1	4	27	68.5234	GE2	1	45	9	8	m8	MedPosterior	6	18		isim	56.9374	39.4946	5	17.6625
2	m	1	4	28	64.2023	GE2	1	45	9	7	m7	MedPosterior	6	17		icrus1	32.9779	8.30642	4	4.15321
2	m	1	4	29	76.0682	GE2	1	45	9	7	m7	MedPosterior	6	17		icrus2	47.4696	17.1442	4	8.57208
2	m	1	4	30	40.1042	GE2	1	45	9	6	m6	MedPosterior	6	16		ipm	55.5424	12.53	2	8.86008
2	m	1	4	31	52.3506	GE2	1	45	9	6	m6	MedPosterior	6	16		icop	38.8206	18.7521	3	10.8265
2	m	1	4	32	50.6286	GE2	1	45	9	6	m6	MedPosterior	6	16		i4/5	25.5568	11.0424	3	6.37533
2	m	1	4	33	38.2345	GE2	1	45	9	4/5	m4/5	MedAnterior	5	15		m2	36.8284	20.4235	9	6.80783
2	m	1	4	34	33.6611	GE2	1	45	9	4/5	m4/5	MedAnterior	5	15		m3	33.0803	16.1713	11	4.87583
2	m	1	4	35	47.3705	GE2	1	45	9	4/5	m4/5	MedAnterior	5	15		m4/5	45.5827	15.4924	11	4.67114
2	m	1	4	36	26.8623	GE2	1	45	9	4/5	m4/5	MedAnterior	5	15		m6	38.6479	15.8883	6	6.48637
2	m	1	4	37	49.5579	GE2	1	45	9	4/5	m4/5	MedAnterior	5	15		m7	45.2218	31.6453	2	22.3766
2	m	1	4	38	83.1916	GE2	1	45	9	4/5	m4/5	MedAnterior	5	15		m8	34.4575	19.7776	7	7.47524
2	m	1	4	39	91.6619	GE2	1	45	9	4/5	m4/5	MedAnterior	5	15		m9	30.598	12.1019	10	3.82695
2	m	1	4	40	68.8464	GE2	1	45	9	3	m3	MedAnterior	5	14		m10	16.2541	8.69938	8	3.0757
2	m	1	4	41	45.4245	GE2	1	45	9	3	m3	MedAnterior	5	14
2	m	1	4	42	43.0726	GE2	1	45	9	3	m3	MedAnterior	5	14
2	m	1	4	43	49.4302	GE2	1	45	9	3	m3	MedAnterior	5	14
2	m	1	4	44	52.9514	GE2	1	45	9	2	m2	MedAnterior	5	13
2	m	1	4	45	37.1168	GE2	1	45	9	2	m2	MedAnterior	5	13
2	m	1	5	190611b_1727	23.4351	GE2	1	45	2	sim	Lsim	Lateral	2	3
2	m	1	5	2	44.6234	GE2	1	45	2	crus1	Lcrus1	Lateral	2	4
2	m	1	5	3	24.0202	GE2	1	45	2	crus1	Lcrus1	Lateral	2	4
2	m	1	5	4	138.385	GE2	1	45	2	crus1	Lcrus1	Lateral	2	4
2	m	1	5	5	73.6182	GE2	1	45	2	crus2	Lcrus2	Lateral	2	5
2	m	1	5	6	27.1413	GE2	1	45	2	crus2	Lcrus2	Lateral	2	5
2	m	1	5	7	17.6309	GE2	1	45	2	pfl	Lpfl	Vestibular	1	1
2	m	1	5	8	71.7681	GE2	1	45	2	pfl	Lpfl	Vestibular	1	1
2	m	1	5	9	49.6935	GE2	1	45	6	4/5	i4/5	IntAnterior	3	12
2	m	1	5	10	57.1302	GE2	1	45	6	sim	isim	IntPosterior	4	7
2	m	1	5	11	27.756	GE2	1	45	6	sim	isim	IntPosterior	4	7
2	m	1	5	12	21.0806	GE2	1	45	6	sim	isim	IntPosterior	4	7
2	m	1	5	13	24.5295	GE2	1	45	6	crus2	icrus2	IntPosterior	4	9
2	m	1	5	14	54.4376	GE2	1	45	6	cop	icop	IntPosterior	4	11
2	m	1	5	15	15.6855	GE2	1	45	10	10	m10	MedPosterior	6	20		GE1	400 days	N	3									m	N	2			f	N	1
2	m	1	5	16	35.0035	GE2	1	45	10	10	m10	MedPosterior	6	20		By Position ID	average	stdev	n	sem		By major regions	average	stdev	n	sem		average	stdev	n	sem		average	stdev	n	sem
2	m	1	5	17	24.7972	GE2	1	45	10	9	m9	MedPosterior	6	19		Lpfl	31.1022	17.2615	4	8.63074		Vestibular	29.1145	15.2423	6	6.22265		31.9197	10.3841	5	4.64392		15.088	10.6688	1	10.6688
2	m	1	5	18	31.1179	GE2	1	45	10	9	m9	MedPosterior	6	19		Lfl	25.1389	14.2141	2	10.0509		Lateral	45.0246	32.3468	11	9.75292		49.6566	29.2329	7	11.049		36.9185	42.4804	4	21.2402
2	m	1	5	19	57.0431	GE2	1	45	10	9	m9	MedPosterior	6	19		Lsim	#DIV/0!	#DIV/0!	0	#DIV/0!		IntAnterior	66.3147	3.49721	2	2.4729		66.3147	3.49721	2	2.4729		#DIV/0!	#DIV/0!	0	#DIV/0!
2	m	1	5	20	67.0223	GE2	1	45	10	8	m8	MedPosterior	6	18		Lcrus1	32.9118	25.969	5	11.6137		IntPosterior	43.4381	19.6555	13	5.45147		40.5196	17.5527	10	5.55066		53.1664	27.6929	3	15.9885
2	m	1	5	21	67.8835	GE2	1	45	10	8	m8	MedPosterior	6	18		Lcrus2	58.5666	44.3308	4	22.1654		MedAnterior	45.5675	17.5802	24	3.58854		44.683	16.5226	17	4.00731		47.7157	21.1932	7	8.01029
2	m	1	5	22	103.733	GE2	1	45	10	7	m7	MedPosterior	6	17		Lpm	48.2225	18.6859	2	13.2129		MedPosterior	33.3027	23.0542	23	4.80714		33.4941	23.292	17	5.64913		32.7602	24.0469	6	9.81711
2	m	1	5	23	30.54	GE2	1	45	10	6	m6	MedPosterior	6	16		isim	40.9155	18.8438	4	9.4219
2	m	1	5	24	133.187	GE2	1	45	10	6	m6	MedPosterior	6	16		icrus1	56.0599	8.30799	4	4.15399
2	m	1	5	25	95.675	GE2	1	45	10	4/5	m4/5	MedAnterior	5	15		icrus2	51.2354	#DIV/0!	1	#DIV/0!
2	m	1	5	26	101.156	GE2	1	45	10	4/5	m4/5	MedAnterior	5	15		ipm	49.6357	35.0977	1	35.0977
2	m	1	5	27	61.4217	GE2	1	45	10	4/5	m4/5	MedAnterior	5	15		icop	25.3074	7.1405	3	4.12257
2	m	1	5	28	72.3477	GE2	1	45	10	3	m3	MedAnterior	5	14		i4/5	66.3147	3.49721	2	2.4729
2	m	1	5	29	49.9756	GE2	1	45	10	3	m3	MedAnterior	5	14		m2	48.7567	9.88611	7	3.7366
2	m	1	5	30	33.9787	GE2	1	45	10	3	m3	MedAnterior	5	14		m3	33.0271	13.8352	9	4.61172
2	m	1	5	31	77.2049	GE2	1	45	10	3	m3	MedAnterior	5	14		m4/5	56.8849	18.8207	8	6.65413
2	m	1	5	32	23.7374	GE2	1	45	10	10	m10	MedPosterior	6	20		m6	36.0919	15.1977	6	6.20445
2	m	1	6	190612a_1729	52.8432	GE2	1	45	3	crus1	Lcrus1	Lateral	2	4		m7	74.3563	#DIV/0!	1	#DIV/0!
2	m	1	6	2	51.9887	GE2	1	45	3	crus2	Lcrus2	Lateral	2	5		m8	29.4028	27.2937	4	13.6469
2	m	1	6	3	43.2865	GE2	1	45	3	pm	Lpm	Lateral	2	6		m9	38.9847	24.2889	7	9.18033
2	m	1	6	4	42.7387	GE2	1	45	7	cop	icop	IntPosterior	4	11		m10	16.9098	11.0297	5	4.93261
2	m	1	6	5	57.5404	GE2	1	45	7	pm	ipm	IntPosterior	4	10
2	m	1	6	6	96.3516	GE2	1	45	7	pm	ipm	IntPosterior	4	10
2	m	1	6	7	92.5873	GE2	1	45	7	crus2	icrus2	IntPosterior	4	9
2	m	1	6	8	64.5048	GE2	1	45	7	crus1	icrus1	IntPosterior	4	8
2	m	1	6	9	52.1051	GE2	1	45	7	crus1	icrus1	IntPosterior	4	8
2	m	1	6	10	50.6915	GE2	1	45	7	sim	isim	IntPosterior	4	7
2	m	1	6	11	12.1281	GE2	1	45	7	sim	isim	IntPosterior	4	7
2	m	1	6	12	48.5925	GE2	1	45	7	4/5	i4/5	IntAnterior	3	12
2	m	1	6	13	22.0901	GE2	1	45	11	10	m10	MedPosterior	6	20
2	m	1	6	14	12.9289	GE2	1	45	11	10	m10	MedPosterior	6	20
2	m	1	6	15	none	GE2	1	45
2	m	1	6	16	none	GE2	1	45
2	m	1	6	17	52.8217	GE2	1	45	11	9	m9	MedPosterior	6	19
2	m	1	6	18	110.29	GE2	1	45	11	9	m9	MedPosterior	6	19
2	m	1	6	19	47.9819	GE2	1	45	11	8	m8	MedPosterior	6	18
2	m	1	6	20	87.5276	GE2	1	45	11	8	m8	MedPosterior	6	18
2	m	1	6	21	15.0814	GE2	1	45	11	7	m7	MedPosterior	6	17
2	m	1	6	22	73.0903	GE2	1	45	11	6	m6	MedPosterior	6	16
2	m	1	6	23	59.0221	GE2	1	45	11	6	m6	MedPosterior	6	16
2	m	1	6	24	45.773	GE2	1	45	11	4/5	m4/5	MedAnterior	5	15
2	m	1	6	25	49.5038	GE2	1	45	11	4/5	m4/5	MedAnterior	5	15
2	m	1	6	26	61.5573	GE2	1	45	11	4/5	m4/5	MedAnterior	5	15
2	m	1	6	27	51.4073	GE2	1	45	11	3	m3	MedAnterior	5	14
2	m	1	6	28	95.1335	GE2	1	45	11	2	m2	MedAnterior	5	13
2	m	1	6	29	50.7884	GE2	1	45	11	2	m2	MedAnterior	5	13
2	f	0	7	190612c_1710	66.3018	GE2	1	45	3	sim	Lsim	Lateral	2	3
2	f	0	7	2	129.268	GE2	1	45	3	sim	Lsim	Lateral	2	3
2	f	0	7	3		GE2	1	45	3	sim			#N/A	#N/A
2	f	0	7	4	12.033	GE2	1	45	3	crus1	Lcrus1	Lateral	2	4
2	f	0	7	5	21.3282	GE2	1	45	6	4/5	i4/5	IntAnterior	3	12
2	f	0	7	6	10.5227	GE2	1	45	6	sim	isim	IntPosterior	4	7
2	f	0	7	7	128.308	GE2	1	45	6	sim	isim	IntPosterior	4	7
2	f	0	7	8	50.918	GE2	1	45	6	sim	isim	IntPosterior	4	7
2	f	0	7	9		GE2	1	45					#N/A	#N/A
2	f	0	7	10	11.6684	GE2	1	45	10	10	m10	MedPosterior	6	20
2	f	0	7	11	32.9087	GE2	1	45	10	10	m10	MedPosterior	6	20
2	f	0	7	12	64.3386	GE2	1	45	10	9	m9	MedPosterior	6	19
2	f	0	7	13	41.7768	GE2	1	45	10	8	m8	MedPosterior	6	18
2	f	0	7	14	37.6483	GE2	1	45	10	6	m6	MedPosterior	6	16
2	f	0	7	15		GE2	1	45	10	6			#N/A	#N/A
2	f	0	7	16	95.4642	GE2	1	45	10	6	m6	MedPosterior	6	16
2	f	0	7	17	47.9785	GE2	1	45	10	6	m6	MedPosterior	6	16
2	f	0	7	18	28.1748	GE2	1	45	10	6	m6	MedPosterior	6	16
2	f	0	7	19	22.3704	GE2	1	45	10	4/5	m4/5	MedAnterior	5	15
2	f	0	7	20	94.6054	GE2	1	45	10	4/5	m4/5	MedAnterior	5	15
2	f	0	7	21	43.3439	GE2	1	45	10	4/5	m4/5	MedAnterior	5	15
2	f	0	7	22	37.1696	GE2	1	45	10	4/5	m4/5	MedAnterior	5	15
2	f	0	7	23	24.7422	GE2	1	45	10	3	m3	MedAnterior	5	14
2	f	0	7	24	63.1886	GE2	1	45	10	3	m3	MedAnterior	5	14
2	f	0	7	25	58.1519	GE2	1	45	10	3	m3	MedAnterior	5	14
2	f	0	7	26	90.1557	GE2	1	45	10	2	m2	MedAnterior	5	13
2	f	0	22	200225_2580	13.7856	GE2	1	45	3	PFl	LPFl	Vestibular	1	1
2	f	0	22		16.48	GE2	1	45	3	PFl	LPFl	Vestibular	1	1
2	f	0	22		29.8821	GE2	1	45	3	Crus1	LCrus1	Lateral	2	4
2	f	0	22		47.1882	GE2	1	45	3	Crus1	LCrus1	Lateral	2	4
2	f	0	22		81.3886	GE2	1	45	3	Crus2	LCrus2	Lateral	2	5
2	f	0	22		63.57	GE2	1	45	3	Crus2	LCrus2	Lateral	2	5
2	f	0	22		43.6505	GE2	1	45	7	sim	isim	IntPosterior	4	7
2	f	0	22		24.5427	GE2	1	45	7	Crus2	iCrus2	IntPosterior	4	9
2	f	0	22		125.795	GE2	1	45	7	Crus1	iCrus1	IntPosterior	4	8
2	f	0	22		90.5766	GE2	1	45	7	PM	iPM	IntPosterior	4	10
2	f	0	22		22.0614	GE2	1	45	12	2	m2	MedAnterior	5	13
2	f	0	22		34.1255	GE2	1	45	12	2	m2	MedAnterior	5	13
2	f	0	22			GE2	1	45	12				#N/A	#N/A
2	f	0	22		84.7458	GE2	1	45	12	3	m3	MedAnterior	5	14
2	f	0	22		78.2957	GE2	1	45	12	3	m3	MedAnterior	5	14
2	f	0	22		66.2969	GE2	1	45	12	4/5	m4/5	MedAnterior	5	15
2	f	0	22		19.6051	GE2	1	45	12	4/5	m4/5	MedAnterior	5	15
2	f	0	22		74.8037	GE2	1	45	12	4/5	m4/5	MedAnterior	5	15
2	f	0	22		97.0069	GE2	1	45	12	6	m6	MedPosterior	6	16
2	f	0	22		64.7864	GE2	1	45	12	6	m6	MedPosterior	6	16
2	f	0	22		31.8646	GE2	1	45	12	7	m7	MedPosterior	6	17
2	f	0	22		46.7871	GE2	1	45	12	7	m7	MedPosterior	6	17
2	f	0	22		39.2579	GE2	1	45	12	8	m8	MedPosterior	6	18
2	f	0	22		39.0303	GE2	1	45	12	8	m8	MedPosterior	6	18
2	f	0	22		36.2402	GE2	1	45	12	9	m9	MedPosterior	6	19
2	f	0	22		37.0562	GE2	1	45	12	9	m9	MedPosterior	6	19
2	f	0	22		48.2878	GE2	1	45	12	9	m9	MedPosterior	6	19
2	f	0	22		40.2118	GE2	1	45	12	10	m10	MedPosterior	6	20
2	f	0	22		16.653	GE2	1	45	12	10	m10	MedPosterior	6	20
2	f	0	8	190725b_1574	56.1454	GE3	2	120	3	pfl	Lpfl	Vestibular	1	1
2	f	0	8	2	51.4891	GE3	2	120	3	pfl	Lpfl	Vestibular	1	1
2	f	0	8	3	20.15	GE3	2	120	3	crus1	Lcrus1	Lateral	2	4
2	f	0	8	4	24.7092	GE3	2	120	3	crus2	Lcrus2	Lateral	2	5
2	f	0	8	5	29.9914	GE3	2	120	3	pm	Lpm	Lateral	2	6
2	f	0	8	6	78.2759	GE3	2	120	7	crus2	icrus2	IntPosterior	4	9
2	f	0	8	7	34.7045	GE3	2	120	7	sim	isim	IntPosterior	4	7
2	f	0	8	8	17.3222	GE3	2	120	7	sim	isim	IntPosterior	4	7
2	f	0	8	9	19.698	GE3	2	120	7	4/5	i4/5	IntAnterior	3	12
2	f	0	8	10	53.2732	GE3	2	120	7	4/5	i4/5	IntAnterior	3	12
2	f	0	8	11	23.6967	GE3	2	120	7	4/5	i4/5	IntAnterior	3	12
2	f	0	8	12	43.6371	GE3	2	120	10	2	m2	MedAnterior	5	13
2	f	0	8	13	42.5709	GE3	2	120	10	2	m2	MedAnterior	5	13
2	f	0	8	14	20.9688	GE3	2	120	10	3	m3	MedAnterior	5	14
2	f	0	8	15	43.5487	GE3	2	120	10	3	m3	MedAnterior	5	14
2	f	0	8	16	35.3872	GE3	2	120	10	3	m3	MedAnterior	5	14
2	f	0	8	17	32.6397	GE3	2	120	10	4/5	m4/5	MedAnterior	5	15
2	f	0	8	18	79.9029	GE3	2	120	10	4/5	m4/5	MedAnterior	5	15
2	f	0	8	19	33.5359	GE3	2	120	10	4/5	m4/5	MedAnterior	5	15
2	f	0	8	20	61.9259	GE3	2	120	10	4/5	m4/5	MedAnterior	5	15
2	f	0	8	21	17.7379	GE3	2	120	10	6	m6	MedPosterior	6	16
2	f	0	8	22	37.9137	GE3	2	120	10	6	m6	MedPosterior	6	16
2	f	0	8	23	80.1542	GE3	2	120	10	7	m7	MedPosterior	6	17
2	f	0	8	24	73.4844	GE3	2	120	10	8	m8	MedPosterior	6	18
2	f	0	8	25	41.3473	GE3	2	120	10	8	m8	MedPosterior	6	18
2	f	0	8	26	36.98	GE3	2	120	10	8	m8	MedPosterior	6	18
2	f	0	8	27	77.9352	GE3	2	120	10	9	m9	MedPosterior	6	19
2	f	0	8	28	73.8045	GE3	2	120	10	9	m9	MedPosterior	6	19
2	f	0	8	29	19.3996	GE3	2	120	10	9	m9	MedPosterior	6	19
2	f	0	8	30	35.5078	GE3	2	120	10	10	m10	MedPosterior	6	20
2	f	0	8	31	37.5783	GE3	2	120	10	10	m10	MedPosterior	6	20
2	f	0	8	32	31.1333	GE3	2	120	10	10	m10	MedPosterior	6	20
2	m	1	9	190812a_1657	25.242	GE3	2	120	2	crus1	Lcrus1	Lateral	2	4
2	m	1	9	2	60.7605	GE3	2	120	6	sim	isim	IntPosterior	4	7
2	m	1	9	3	107.879	GE3	2	120	6	crus2	icrus2	IntPosterior	4	9
2	m	1	9	4	54.0176	GE3	2	120	6	pm	ipm	IntPosterior	4	10
2	m	1	9	5	98.4383	GE3	2	120	6	pm	ipm	IntPosterior	4	10
2	m	1	9	6	41.4758	GE3	2	120	6	cop	icop	IntPosterior	4	11
2	m	1	9	7	29.864	GE3	2	120	11	2	m2	MedAnterior	5	13
2	m	1	9	8	13.4652	GE3	2	120	11	2	m2	MedAnterior	5	13
2	m	1	9	9	100.944	GE3	2	120	11	3	m3	MedAnterior	5	14
2	m	1	9	10	49.986	GE3	2	120	11	3	m3	MedAnterior	5	14
2	m	1	9	11	14.4819	GE3	2	120	11	3	m3	MedAnterior	5	14
2	m	1	9	12	32.3948	GE3	2	120	11	4/5	m4/5	MedAnterior	5	15
2	m	1	9	13	87.2166	GE3	2	120	11	4/5	m4/5	MedAnterior	5	15
2	m	1	9	14	89.6916	GE3	2	120	11	4/5	m4/5	MedAnterior	5	15
2	m	1	9	15	14.17	GE3	2	120	11	6	m6	MedPosterior	6	16
2	m	1	9	16	43.0668	GE3	2	120	11	7	m7	MedPosterior	6	17
2	m	1	9	17	51.0538	GE3	2	120	11	8	m8	MedPosterior	6	18
2	m	1	9	18	19.8291	GE3	2	120	11	8	m8	MedPosterior	6	18
2	m	1	9	19	38.6432	GE3	2	120	11	9	m9	MedPosterior	6	19
2	m	1	9	20	28.697	GE3	2	120	11	9	m9	MedPosterior	6	19
2	m	1	9	21	17.1437	GE3	2	120	11	10	m10	MedPosterior	6	20
2	f	0	10	190823a_1670	24.4024	GE3	2	120	3	crus1	Lcrus1	Lateral	2	4
2	f	0	10		64.6242	GE3	2	120	3	crus2	Lcrus2	Lateral	2	5
2	f	0	10		17.085	GE3	2	120	3	pfl	Lpfl	Vestibular	1	1
2	f	0	10		20.8164	GE3	2	120	6	4/5	i4/5	IntAnterior	3	12
2	f	0	10		42.0772	GE3	2	120	6	sim	isim	IntPosterior	4	7
2	f	0	10		103.522	GE3	2	120	6	crus2	icrus2	IntPosterior	4	9
2	f	0	10		10.4666	GE3	2	120	6	cop	icop	IntPosterior	4	11
2	f	0	10		41.2628	GE3	2	120	6	cop	icop	IntPosterior	4	11
2	f	0	10		29.2374	GE3	2	120	11	2	m2	MedAnterior	5	13
2	f	0	10		84.5445	GE3	2	120	11	2	m2	MedAnterior	5	13
2	f	0	10		35.2792	GE3	2	120	11	3	m3	MedAnterior	5	14
2	f	0	10		51.2844	GE3	2	120	11	3	m3	MedAnterior	5	14
2	f	0	10		99.5207	GE3	2	120	11	3	m3	MedAnterior	5	14
2	f	0	10		74.4941	GE3	2	120	11	4/5	m4/5	MedAnterior	5	15
2	f	0	10		32.301	GE3	2	120	11	4/5	m4/5	MedAnterior	5	15
2	f	0	10		49.2635	GE3	2	120	11	4/5	m4/5	MedAnterior	5	15
2	f	0	10		47.4909	GE3	2	120	11	6	m6	MedPosterior	6	16
2	f	0	10		46.6752	GE3	2	120	11	6	m6	MedPosterior	6	16
2	f	0	10		21.4614	GE3	2	120	11	7	m7	MedPosterior	6	17
2	f	0	10		102.379	GE3	2	120	11	8	m8	MedPosterior	6	18
2	f	0	10		35.6724	GE3	2	120	11	8	m8	MedPosterior	6	18
2	f	0	10		19.9862	GE3	2	120	11	9	m9	MedPosterior	6	19
2	f	0	10		23.6301	GE3	2	120	11	9	m9	MedPosterior	6	19
2	f	0	10		29.8818	GE3	2	120	11	9	m9	MedPosterior	6	19
2	f	0	10		31.4678	GE3	2	120	11	10	m10	MedPosterior	6	20
2	f	0	10		23.8469	GE3	2	120	11	10	m10	MedPosterior	6	20
2	f	0	11	190823b_1671	58.249	GE3	2	120	3	crus2	Lcrus2	Lateral	2	5
2	f	0	11		18.8668	GE3	2	120	3	pm	Lpm	Lateral	2	6
2	f	0	11		19.5389	GE3	2	120	3	cop	Lcop	lateral	2	#N/A
2	f	0	11		14.8045	GE3	2	120	7	pm	ipm	IntPosterior	4	10
2	f	0	11			GE3	2	120	7	crus2	icrus2	IntPosterior	4	9
2	f	0	11		56.0984	GE3	2	120	7	sim	isim	IntPosterior	4	7
2	f	0	11		27.0384	GE3	2	120	7	4/5	i4/5	IntAnterior	3	12
2	f	0	11			GE3	2	120	7	4/5			#N/A	#N/A
2	f	0	11		26.7654	GE3	2	120	7	4/5	i4/5	IntAnterior	3	12
2	f	0	11		31.0733	GE3	2	120	11	10	m10	MedPosterior	6	20
2	f	0	11		34.3172	GE3	2	120	11	10	m10	MedPosterior	6	20
2	f	0	11		38.5215	GE3	2	120	11	9	m9	MedPosterior	6	19
2	f	0	11		81.5235	GE3	2	120	11	9	m9	MedPosterior	6	19
2	f	0	11		59.4076	GE3	2	120	11	9	m9	MedPosterior	6	19
2	f	0	11		35.0226	GE3	2	120	11	8	m8	MedPosterior	6	18
2	f	0	11		33.0574	GE3	2	120	11	8	m8	MedPosterior	6	18
2	f	0	11		39.6321	GE3	2	120	11	7	m7	MedPosterior	6	17
2	f	0	11		54.1683	GE3	2	120	11	6	m6	MedPosterior	6	16
2	f	0	11		73.2445	GE3	2	120	11	6	m6	MedPosterior	6	16
2	f	0	11		23.8449	GE3	2	120	11	4/5	m4/5	MedAnterior	5	15
2	f	0	11		11.2919	GE3	2	120	11	4/5	m4/5	MedAnterior	5	15
2	f	0	11			GE3	2	120	11	3			#N/A	#N/A
2	f	0	11		42.421	GE3	2	120	11	3	m3	MedAnterior	5	14
2	f	0	11		45.5681	GE3	2	120	11	3	m3	MedAnterior	5	14
2	f	0	11		55.8347	GE3	2	120	11	2	m2	MedAnterior	5	13
2	f	0	11		24.055	GE3	2	120	11	2	m2	MedAnterior	5	13
2	f	0	11		19.7605	GE3	2	120	11	2	m2	MedAnterior	5	13
2	f	0	11		59.0412	GE3	2	120	11	2	m2	MedAnterior	5	13
2	f	0	12	190826a_1695	61.0936	GE3	2	120	3	sim	Lsim	Lateral	2	3
2	f	0	12	2	31.4945	GE3	2	120	3	crus1	Lcrus1	Lateral	2	4
2	f	0	12	3	30.623	GE3	2	120	3	crus1	Lcrus1	Lateral	2	4
2	f	0	12	4	63.8363	GE3	2	120	3	crus2	Lcrus2	Lateral	2	5
2	f	0	12	5	106.383	GE3	2	120	3	crus2	Lcrus2	Lateral	2	5
2	f	0	12	6	67.734	GE3	2	120	3	pm	Lpm	Lateral	2	6
2	f	0	12	7	34.1156	GE3	2	120	5	4/5	i4/5	IntAnterior	3	12
2	f	0	12	8	25.2423	GE3	2	120	5	sim	isim	IntPosterior	4	7
2	f	0	12	9	51.5305	GE3	2	120	5	sim	isim	IntPosterior	4	7
2	f	0	12	10	76.0032	GE3	2	120	5	crus1	icrus1	IntPosterior	4	8
2	f	0	12	11	163.523	GE3	2	120	5	pm	ipm	IntPosterior	4	10
2	f	0	12	12	5.05221	GE3	2	120	5	pm	ipm	IntPosterior	4	10
2	f	0	12	13	25.37	GE3	2	120	5	pm	ipm	IntPosterior	4	10
2	f	0	12	14		GE3	2	120	5	cop			#N/A	#N/A
2	f	0	12	15	54.8502	GE3	2	120	10	10	m10	MedPosterior	6	20
2	f	0	12	16	81.2265	GE3	2	120	10	10	m10	MedPosterior	6	20
2	f	0	12	17	27.0495	GE3	2	120	10	10	m10	MedPosterior	6	20
2	f	0	12	18	15.6511	GE3	2	120	10	9	m9	MedPosterior	6	19
2	f	0	12	19	92.0999	GE3	2	120	10	9	m9	MedPosterior	6	19
2	f	0	12	20	63.7794	GE3	2	120	10	8	m8	MedPosterior	6	18
2	f	0	12	21	98.8701	GE3	2	120	10	8	m8	MedPosterior	6	18
2	f	0	12	22	38.8787	GE3	2	120	10	7	m7	MedPosterior	6	17
2	f	0	12	23	50.7511	GE3	2	120	10	6	m6	MedPosterior	6	16
2	f	0	12	24	52.504	GE3	2	120	10	6	m6	MedPosterior	6	16
2	f	0	12	25	120.02	GE3	2	120	10	6	m6	MedPosterior	6	16
2	f	0	12	26	126.863	GE3	2	120	10	4/5	m4/5	MedAnterior	5	15
2	f	0	12	27	61.7596	GE3	2	120	10	4/5	m4/5	MedAnterior	5	15
2	f	0	12	28	31.3638	GE3	2	120	10	4/5	m4/5	MedAnterior	5	15
2	f	0	12	29	51.5783	GE3	2	120	10	3	m3	MedAnterior	5	14
2	f	0	12	30	65.0473	GE3	2	120	10	3	m3	MedAnterior	5	14
2	f	0	12	31	117.991	GE3	2	120	10	3	m3	MedAnterior	5	14
2	f	0	12	32	87.4962	GE3	2	120	10	3	m3	MedAnterior	5	14
2	f	0	12	33	37.9994	GE3	2	120	10	2	m2	MedAnterior	5	13
2	m	1	13	190924a_1830	107.827	GE3	2	120	2	sim	Lsim	Lateral	2	3
2	m	1	13	2	46.2438	GE3	2	120	2	sim	Lsim	Lateral	2	3
2	m	1	13	3	41.4078	GE3	2	120	2	sim	Lsim	Lateral	2	3
2	m	1	13	4	39.2702	GE3	2	120	2	sim	Lsim	Lateral	2	3
2	m	1	13	5	28.3044	GE3	2	120	2	crus1	Lcrus1	Lateral	2	4
2	m	1	13	6	103.568	GE3	2	120	2	crus2	Lcrus2	Lateral	2	5
2	m	1	13	7	146.7	GE3	2	120	2	pm	Lpm	Lateral	2	6
2	m	1	13	8	114.325	GE3	2	120	2	pm	Lpm	Lateral	2	6
2	m	1	13	9	27.4684	GE3	2	120	2	pfl	Lpfl	Vestibular	1	1
2	m	1	13	10	43.1666	GE3	2	120	6	4/5	i4/5	IntAnterior	3	12
2	m	1	13	11	32.8469	GE3	2	120	6	4/5	i4/5	IntAnterior	3	12
2	m	1	13	12	24.1716	GE3	2	120	6	sim	isim	IntPosterior	4	7
2	m	1	13	13	75.3022	GE3	2	120	6	sim	isim	IntPosterior	4	7
2	m	1	13	14	50.3268	GE3	2	120	11	2	m2	MedAnterior	5	13
2	m	1	13	15	20.9151	GE3	2	120	11	2	m2	MedAnterior	5	13
2	m	1	13	16	57.3342	GE3	2	120	11	3	m3	MedAnterior	5	14
2	m	1	13	17	43.1452	GE3	2	120	11	3	m3	MedAnterior	5	14
2	m	1	13	18	4.93361	GE3	2	120	11	4/5	m4/5	MedAnterior	5	15
2	m	1	13	19		GE3	2	120	11	4/5			#N/A	#N/A
2	m	1	13	20	55.6515	GE3	2	120	11	6	m6	MedPosterior	6	16
2	m	1	13	21	62.9354	GE3	2	120	11	6	m6	MedPosterior	6	16
2	m	1	13	22	70.658	GE3	2	120	11	7	m7	MedPosterior	6	17
2	m	1	13	23	25.6265	GE3	2	120	11	8	m8	MedPosterior	6	18
2	m	1	13	24	17.5892	GE3	2	120	11	9	m9	MedPosterior	6	19
2	m	1	13	25	9.63502	GE3	2	120	11	9	m9	MedPosterior	6	19
2	m	1	13	26	54.8744	GE3	2	120	11	10	m10	MedPosterior	6	20
2	m	1	13	27	26.7246	GE3	2	120	11	10	m10	MedPosterior	6	20
2	m	1	14	191008_1874	44.0673	GE3	2	120	3	pm	Lpm	Lateral	2	6
2	m	1	14	2	56.2824	GE3	2	120	3	crus2	Lcrus2	Lateral	2	5
2	m	1	14	3	47.0978	GE3	2	120	3	crus2	Lcrus2	Lateral	2	5
2	m	1	14	4	41.8718	GE3	2	120	3	crus1	Lcrus1	Lateral	2	4
2	m	1	14	5	61.4576	GE3	2	120	3	sim	Lsim	Lateral	2	3
2	m	1	14	6	23.1282	GE3	2	120	3	pfl	Lpfl	Vestibular	1	1
2	m	1	14	7	6.73257	GE3	2	120	3	pfl	Lpfl	Vestibular	1	1
2	m	1	14	8	48.3449	GE3	2	120	3	fl	Lfl	Vestibular	1	2
2	m	1	14	9	58.162	GE3	2	120	3	fl	Lfl	Vestibular	1	2
2	m	1	14	10	47.3956	GE3	2	120	6	pm	ipm	IntPosterior	4	10
2	m	1	14	11	59.0139	GE3	2	120	6	pm	ipm	IntPosterior	4	10
2	m	1	14	12	71.8866	GE3	2	120	6	crus2	icrus2	IntPosterior	4	9
2	m	1	14	13	34.188	GE3	2	120	6	crus2	icrus2	IntPosterior	4	9
2	m	1	14	14	28.4308	GE3	2	120	6	crus1	icrus1	IntPosterior	4	8
2	m	1	14	15	64.2566	GE3	2	120	6	crus1	icrus1	IntPosterior	4	8
2	m	1	14	16	43.7757	GE3	2	120	6	sim	isim	IntPosterior	4	7
2	m	1	14	17	45.6323	GE3	2	120	6	sim	isim	IntPosterior	4	7
2	m	1	14	18	13.5233	GE3	2	120	6	cop	icop	IntPosterior	4	11
2	m	1	14	19	50.1518	GE3	2	120	13	2	m2	MedAnterior	5	13
2	m	1	14	20	76.6204	GE3	2	120	13	2	m2	MedAnterior	5	13
2	m	1	14	21	44.1851	GE3	2	120	13	2	m2	MedAnterior	5	13
2	m	1	14	22	51.4515	GE3	2	120	13	3	m3	MedAnterior	5	14
2	m	1	14	23	45.99	GE3	2	120	13	3	m3	MedAnterior	5	14
2	m	1	14	24	49.1294	GE3	2	120	13	4/5	m4/5	MedAnterior	5	15
2	m	1	14	25	45.5573	GE3	2	120	13	4/5	m4/5	MedAnterior	5	15
2	m	1	14	26	55.0391	GE3	2	120	13	6	m6	MedPosterior	6	16
2	m	1	14	27	27.6162	GE3	2	120	13	6	m6	MedPosterior	6	16
2	m	1	14	28	39.3274	GE3	2	120	13	7	m7	MedPosterior	6	17
2	m	1	14	29	53.158	GE3	2	120	13	8	m8	MedPosterior	6	18
2	m	1	14	30	75.6991	GE3	2	120	13	8	m8	MedPosterior	6	18
2	m	1	14	31	30.726	GE3	2	120	13	8	m8	MedPosterior	6	18
2	m	1	14	32	38.5116	GE3	2	120	13	9	m9	MedPosterior	6	19
2	m	1	14	33	28.7376	GE3	2	120	13	8	m8	MedPosterior	6	18
2	m	1	14	34	37.7373	GE3	2	120	13	9	m9	MedPosterior	6	19
2	m	1	14	35	47.5825	GE3	2	120	13	9	m9	MedPosterior	6	19
2	m	1	14	36	39.7128	GE3	2	120	13	10	m10	MedPosterior	6	20
2	m	1	14	37	32.6555	GE3	2	120	13	10	m10	MedPosterior	6	20
2	m	1	19	200105a_2226	32.4529	GE3	2	120	3	Fl	LFl	Vestibular	1	2
2	m	1	19		1.91477	GE3	2	120	3	PFl	LPFl	Vestibular	1	1
2	m	1	19		4.07863	GE3	2	120	3	PFl	LPFl	Vestibular	1	1
2	m	1	19		21.1551	GE3	2	120	3	Crus1	LCrus1	Lateral	2	4
2	m	1	19		20.5459	GE3	2	120	3	Crus2	LCrus2	Lateral	2	5
2	m	1	19		5.70773	GE3	2	120	3	Crus2	LCrus2	Lateral	2	5
2	m	1	19		74.1045	GE3	2	120	3	PM	LPM	Lateral	2	6
2	m	1	19		33.2156	GE3	2	120	6	Cop	iCop	IntPosterior	4	11
2	m	1	19		64.0252	GE3	2	120	6	PM	iPM	IntPosterior	4	10
2	m	1	19		69.4811	GE3	2	120	6	Crus2	iCrus2	IntPosterior	4	9
2	m	1	19		24.9375	GE3	2	120	6	Crus1	iCrus1	IntPosterior	4	8
2	m	1	19		22.0154	GE3	2	120	6	Sim	iSim	IntPosterior	4	7
2	m	1	19		22.28	GE3	2	120	6	4/5	i4/5	IntAnterior	3	12
2	m	1	19		42.9152	GE3	2	120	12	2	m2	MedAnterior	5	13
2	m	1	19		51.9884	GE3	2	120	12	2	m2	MedAnterior	5	13
2	m	1	19		49.2657	GE3	2	120	12	3	m3	MedAnterior	5	14
2	m	1	19		36.2379	GE3	2	120	12	3	m3	MedAnterior	5	14
2	m	1	19		41.3783	GE3	2	120	12	3	m3	MedAnterior	5	14
2	m	1	19		58.7025	GE3	2	120	12	4/5	m4/5	MedAnterior	5	15
2	m	1	19		102.283	GE3	2	120	12	4/5	m4/5	MedAnterior	5	15
2	m	1	19		137.452	GE3	2	120	12	4/5	m4/5	MedAnterior	5	15
2	m	1	19		59.572	GE3	2	120	12	6	m6	MedPosterior	6	16
2	m	1	19		39.0938	GE3	2	120	12	6	m6	MedPosterior	6	16
2	m	1	19		85.7666	GE3	2	120	12	7	m7	MedPosterior	6	17
2	m	1	19		82.6792	GE3	2	120	12	8	m8	MedPosterior	6	18
2	m	1	19		45.4176	GE3	2	120	12	8	m8	MedPosterior	6	18
2	m	1	19		32.5574	GE3	2	120	12	9	m9	MedPosterior	6	19
2	m	1	19		80.6924	GE3	2	120	12	9	m9	MedPosterior	6	19
2	m	1	19		18.6457	GE3	2	120	12	9	m9	MedPosterior	6	19
2	m	1	19		34.7852	GE3	2	120	12	10	m10	MedPosterior	6	20
2	m	1	19		14.5844	GE3	2	120	12	10	m10	MedPosterior	6	20
2	f	0	15	191122b_1711		GE4	3	210	2	crus2			#N/A	#N/A
2	f	0	15	2	79.455	GE4	3	210	2	crus2	Lcrus2	Lateral	2	5
2	f	0	15	3	39.8467	GE4	3	210	2	crus2	Lcrus2	Lateral	2	5
2	f	0	15	4	38.2289	GE4	3	210	6	crus2	icrus2	IntPosterior	4	9
2	f	0	15	5		GE4	3	210	6	crus2			#N/A	#N/A
2	f	0	15	6	32.7829	GE4	3	210	6	sim	isim	IntPosterior	4	7
2	f	0	15	7	118.891	GE4	3	210	6	sim	isim	IntPosterior	4	7
2	f	0	15	8	16.9078	GE4	3	210	12	10	m10	MedPosterior	6	20
2	f	0	15	9	34.5583	GE4	3	210	12	10	m10	MedPosterior	6	20
2	f	0	15	10	8.76445	GE4	3	210	12	9	m9	MedPosterior	6	19
2	f	0	15	11	48.3397	GE4	3	210	12	9	m9	MedPosterior	6	19
2	f	0	15	12	22.9501	GE4	3	210	12	9	m9	MedPosterior	6	19
2	f	0	15	13	22.3189	GE4	3	210	12	8	m8	MedPosterior	6	18
2	f	0	15	14		GE4	3	210	12	8			#N/A	#N/A
2	f	0	15	15	63.1034	GE4	3	210	12	7	m7	MedPosterior	6	17
2	f	0	15	16	26.6764	GE4	3	210	12	6	m6	MedPosterior	6	16
2	f	0	15	17	47.2535	GE4	3	210	12	4/5	m4/5	MedAnterior	5	15
2	f	0	15	18	56.0762	GE4	3	210	12	4/5	m4/5	MedAnterior	5	15
2	f	0	15	19	22.9383	GE4	3	210	12	4/5	m4/5	MedAnterior	5	15
2	f	0	15	20	34.8243	GE4	3	210	12	3	m3	MedAnterior	5	14
2	f	0	15	21	39.3505	GE4	3	210	12	3	m3	MedAnterior	5	14
2	f	0	15	22	28.2877	GE4	3	210	12	3	m3	MedAnterior	5	14
2	f	0	15	23	12.4497	GE4	3	210	12	2	m2	MedAnterior	5	13
2	f	0	15	24	82.0392	GE4	3	210	12	2	m2	MedAnterior	5	13
2	f	0	15	25	43.4881	GE4	3	210	12	2	m2	MedAnterior	5	13
2	m	1	17	191223_1785	51.9358	GE4	3	210	3	Fl	LFl	Vestibular	1	2
2	m	1	17	2	19.0154	GE4	3	210	3	Fl	LFl	Vestibular	1	2
2	m	1	17	3	31.9591	GE4	3	210	3	PFl	LPFl	Vestibular	1	1
2	m	1	17	4	56.5182	GE4	3	210	3	Sim	LSim	Lateral	2	3
2	m	1	17	5	33.5249	GE4	3	210	3	Sim	LSim	Lateral	2	3
2	m	1	17	6	28.458	GE4	3	210	3	Crus1	LCrus1	Lateral	2	4
2	m	1	17	7	24.8843	GE4	3	210	3	Crus1	LCrus1	Lateral	2	4
2	m	1	17	8	50.5401	GE4	3	210	3	Crus2	LCrus2	Lateral	2	5
2	m	1	17	9	50.193	GE4	3	210	3	Crus2	LCrus2	Lateral	2	5
2	m	1	17	10	39.897	GE4	3	210	3	PM	LPM	Lateral	2	6
2	m	1	17	11	110.189	GE4	3	210	3	PM	LPM	Lateral	2	6
2	m	1	17	12	14.3069	GE4	3	210	6	4/5	i4/5	IntAnterior	3	12
2	m	1	17	13	67.1218	GE4	3	210	6	Sim	iSim	IntPosterior	4	7
2	m	1	17	14	none	GE4	3	210	6				#N/A	#N/A
2	m	1	17	15	25.7996	GE4	3	210	6	Crus1	iCrus1	IntPosterior	4	8
2	m	1	17	16	39.8226	GE4	3	210	6	crus1	icrus1	IntPosterior	4	8
2	m	1	17	17	34.1736	GE4	3	210	6	Crus2	iCrus2	IntPosterior	4	9
2	m	1	17	18	17.6497	GE4	3	210	6	cop	icop	IntPosterior	4	11
2	m	1	17	19	12.6773	GE4	3	210	12	10	m10	MedPosterior	6	20
2	m	1	17	20	18.295	GE4	3	210	12	10	m10	MedPosterior	6	20
2	m	1	17	21	none	GE4	3	210	12	9			#N/A	#N/A
2	m	1	17	22	20.2851	GE4	3	210	12	9	m9	MedPosterior	6	19
2	m	1	17	23	33.4572	GE4	3	210	12	9	m9	MedPosterior	6	19
2	m	1	17	24	72.1065	GE4	3	210	12	8	m8	MedPosterior	6	18
2	m	1	17	25	43.3916	GE4	3	210	12	8	m8	MedPosterior	6	18
2	m	1	17	26	66.4749	GE4	3	210	12	6	m6	MedPosterior	6	16
2	m	1	17	27	26.7705	GE4	3	210	12	6	m6	MedPosterior	6	16
2	m	1	17	28	13.4893	GE4	3	210	12	4/5	m4/5	MedAnterior	5	15
2	m	1	17	29	54.6872	GE4	3	210	12	4/5	m4/5	MedAnterior	5	15
2	m	1	17	30	60.8722	GE4	3	210	12	3	m3	MedAnterior	5	14
2	m	1	17	31	18.7648	GE4	3	210	12	3	m3	MedAnterior	5	14
2	m	1	17	32	10.2774	GE4	3	210	12	3	m3	MedAnterior	5	14
2	m	1	17	33	23.4871	GE4	3	210	12	2	m2	MedAnterior	5	13
2	m	1	17	34	44.8691	GE4	3	210	12	2	m2	MedAnterior	5	13
2	m	1	20	200129a_2004	30.6412	GE4	3	210	3	PFl	LPFl	Vestibular	1	1
2	m	1	20		55.4673	GE4	3	210	3	PFl	LPFl	Vestibular	1	1
2	m	1	20		10.2456	GE4	3	210	3	Fl	LFl	Vestibular	1	2
2	m	1	20		9.31753	GE4	3	210	3	Fl	LFl	Vestibular	1	2
2	m	1	20		34.6261	GE4	3	210	3	sim	Lsim	Lateral	2	3
2	m	1	20		5.80686	GE4	3	210	3	sim	Lsim	Lateral	2	3
2	m	1	20		44.9935	GE4	3	210	3	crus1	Lcrus1	Lateral	2	4
2	m	1	20		35.7318	GE4	3	210	3	PM	LPM	Lateral	2	6
2	m	1	20		36.3793	GE4	3	210	6	4/5	i4/5	IntAnterior	3	12
2	m	1	20		16.1719	GE4	3	210	6	sim	isim	IntPosterior	4	7
2	m	1	20		40.512	GE4	3	210	6	crus1	icrus1	IntPosterior	4	8
2	m	1	20		45.2167	GE4	3	210	6	crus2	icrus2	IntPosterior	4	9
2	m	1	20		46.6823	GE4	3	210	6	PM	iPM	IntPosterior	4	10
2	m	1	20		45.4707	GE4	3	210	6	cop	icop	IntPosterior	4	11
2	m	1	20		36.6753	GE4	3	210	11	2	m2	MedAnterior	5	13
2	m	1	20		38.1564	GE4	3	210	11	2	m2	MedAnterior	5	13
2	m	1	20		11.045	GE4	3	210	11	3	m3	MedAnterior	5	14
2	m	1	20		54.2047	GE4	3	210	11	3	m3	MedAnterior	5	14
2	m	1	20		42.878	GE4	3	210	11	4/5	m4/5	MedAnterior	5	15
2	m	1	20		69.4037	GE4	3	210	11	4/5	m4/5	MedAnterior	5	15
2	m	1	20		49.4908	GE4	3	210	11	4/5	m4/5	MedAnterior	5	15
2	m	1	20		48.7866	GE4	3	210	11	6	m6	MedPosterior	6	16
2	m	1	20		30.8724	GE4	3	210	11	6	m6	MedPosterior	6	16
2	m	1	20			GE4	3	210	11	7	m7	MedPosterior	6	17
2	m	1	20		18.2378	GE4	3	210	11	8	m8	MedPosterior	6	18
2	m	1	20		19.671	GE4	3	210	11	8	m8	MedPosterior	6	18
2	m	1	20		23.3059	GE4	3	210	11	9	m9	MedPosterior	6	19
2	m	1	20		38.6265	GE4	3	210	11	9	m9	MedPosterior	6	19
2	m	1	20		6.14296	GE4	3	210	11	10	m10	MedPosterior	6	20
2	m	1	20		10.2192	GE4	3	210	11	10	m10	MedPosterior	6	20				#NAME?
2	m	1	21	200129b_2040	18.5146	GE4	3	210	3	Fl	LFl	Vestibular	1	2
2	m	1	21		44.7434	GE4	3	210	3	Fl	LFl	Vestibular	1	2
2	m	1	21		9.4436	GE4	3	210	3	Sim	LSim	Lateral	2	3
2	m	1	21		79.2132	GE4	3	210	3	crus1	Lcrus1	Lateral	2	4
2	m	1	21		84.6014	GE4	3	210	3	crus2	Lcrus2	Lateral	2	5
2	m	1	21		75.9467	GE4	3	210	3	PM	LPM	Lateral	2	6
2	m	1	21		25.9842	GE4	3	210	6	4/5	i4/5	IntAnterior	3	12
2	m	1	21		49.7198	GE4	3	210	6	sim	isim	IntPosterior	4	7
2	m	1	21		25.7773	GE4	3	210	6	crus1	icrus1	IntPosterior	4	8
2	m	1	21		72.259	GE4	3	210	6	crus2	icrus2	IntPosterior	4	9
2	m	1	21		64.4024	GE4	3	210	6	PM	iPM	IntPosterior	4	10
2	m	1	21		53.3413	GE4	3	210	6	cop	icop	IntPosterior	4	11
2	m	1	21		16.8735	GE4	3	210	11	2	m2	MedAnterior	5	13
2	m	1	21		33.4172	GE4	3	210	11	2	m2	MedAnterior	5	13
2	m	1	21		29.888	GE4	3	210	11	3	m3	MedAnterior	5	14
2	m	1	21		32.7813	GE4	3	210	11	3	m3	MedAnterior	5	14
2	m	1	21		43.5877	GE4	3	210	11	3	m3	MedAnterior	5	14
2	m	1	21		43.4466	GE4	3	210	11	4/5	m4/5	MedAnterior	5	15
2	m	1	21		53.2219	GE4	3	210	11	4/5	m4/5	MedAnterior	5	15
2	m	1	21		48.5243	GE4	3	210	11	4/5	m4/5	MedAnterior	5	15
2	m	1	21		32.3069	GE4	3	210	11	6	m6	MedPosterior	6	16
2	m	1	21		none	GE4	3	210	11	6	m6	MedPosterior	6	16
2	m	1	21		27.3403	GE4	3	210	11	7	m7	MedPosterior	6	17
2	m	1	21		43.0986	GE4	3	210	11	8	m8	MedPosterior	6	18
2	m	1	21		22.3777	GE4	3	210	11	8	m8	MedPosterior	6	18
2	m	1	21		45.4862	GE4	3	210	11	9	m9	MedPosterior	6	19
2	m	1	21		34.3755	GE4	3	210	11	9	m9	MedPosterior	6	19
2	m	1	21		30.389	GE4	3	210	11	9	m9	MedPosterior	6	19
2	m	1	21		19.9666	GE4	3	210	11	10	m10	MedPosterior	6	20
2	m	1	21		11.2654	GE4	3	210	11	10	m10	MedPosterior	6	20
2	f	0	16	191216_952		GE1	4	400	3	PFl	LPFl	Vestibular	1	1
2	f	0	16		15.088	GE1	4	400	3	Fl	LFl	Vestibular	1	2
2	f	0	16		35.0095	GE1	4	400	3	PM	LPM	Lateral	2	6
2	f	0	16		97.5877	GE1	4	400	3	Crus2	LCrus2	Lateral	2	5
2	f	0	16		6.32014	GE1	4	400	3	Crus2	LCrus2	Lateral	2	5
2	f	0	16		8.75654	GE1	4	400	3	Crus1	LCrus1	Lateral	2	4
2	f	0	16			GE1	4	400	6	sim	isim	IntPosterior	4	7
2	f	0	16		46.8276	GE1	4	400	6	sim	isim	IntPosterior	4	7
2	f	0	16		48.5761	GE1	4	400	6	crus1	icrus1	IntPosterior	4	8
2	f	0	16		64.0954	GE1	4	400	6	crus1	icrus1	IntPosterior	4	8
2	f	0	16		44.7817	GE1	4	400	12	2	m2	MedAnterior	5	13
2	f	0	16		40.4501	GE1	4	400	12	2	m2	MedAnterior	5	13
2	f	0	16		14.2727	GE1	4	400	12	3	m3	MedAnterior	5	14
2	f	0	16		52.187	GE1	4	400	12	3	m3	MedAnterior	5	14
2	f	0	16		48.2646	GE1	4	400	12	3	m3	MedAnterior	5	14
2	f	0	16		47.6754	GE1	4	400	12	4/5	m4/5	MedAnterior	5	15
2	f	0	16		86.3782	GE1	4	400	12	4/5	m4/5	MedAnterior	5	15
2	f	0	16		17.7394	GE1	4	400	12	6	m6	MedPosterior	6	16
2	f	0	16			GE1	4	400	12	8	m8	MedPosterior	6	18
2	f	0	16		14.0611	GE1	4	400	12	8	m8	MedPosterior	6	18
2	f	0	16		52.3963	GE1	4	400	12	9	m9	MedPosterior	6	19
2	f	0	16		67.4941	GE1	4	400	12	9	m9	MedPosterior	6	19
2	f	0	16		31.6302	GE1	4	400	12	10	m10	MedPosterior	6	20
2	f	0	16		13.2401	GE1	4	400	12	10	m10	MedPosterior	6	20
2	m	1	18	191229b_989	35.1897	GE1	4	400	3	Fl	LFl	Vestibular	1	2
2	m	1	18	2	53.7558	GE1	4	400	3	crus1	Lcrus1	Lateral	2	4
2	m	1	18	3	38.8734	GE1	4	400	3	crus1	Lcrus1	Lateral	2	4
2	m	1	18	4		GE1	4	400	3	crus2	Lcrus2	Lateral	2	5
2	m	1	18	5	61.4354	GE1	4	400	3	PM	LPM	Lateral	2	6
2	m	1	18	6	28.4259	GE1	4	400	7	cop	icop	IntPosterior	4	11
2	m	1	18	7		GE1	4	400	7	PM	iPM	IntPosterior	4	10
2	m	1	18	8	62.3544	GE1	4	400	7	crus1	icrus1	IntPosterior	4	8
2	m	1	18	9	41.5417	GE1	4	400	7	sim	isim	IntPosterior	4	7
2	m	1	18	10	68.7877	GE1	4	400	7	4/5	i4/5	IntAnterior	3	12
2	m	1	18	11		GE1	4	400	12	10	m10	MedPosterior	6	20
2	m	1	18	12	5.15319	GE1	4	400	12	10	m10	MedPosterior	6	20
2	m	1	18	13	20.4896	GE1	4	400	12	9	m9	MedPosterior	6	19
2	m	1	18	14	30.1477	GE1	4	400	12	9	m9	MedPosterior	6	19
2	m	1	18	15	7.30619	GE1	4	400	12	9	m9	MedPosterior	6	19
2	m	1	18	16	17.9013	GE1	4	400	12	8	m8	MedPosterior	6	18
2	m	1	18	17	14.8937	GE1	4	400	12	8	m8	MedPosterior	6	18
2	m	1	18	18	74.3563	GE1	4	400	12	7	m7	MedPosterior	6	17
2	m	1	18	19	32.7525	GE1	4	400	12	6	m6	MedPosterior	6	16
2	m	1	18	20	53.2245	GE1	4	400	12	6	m6	MedPosterior	6	16
2	m	1	18	21	39.1289	GE1	4	400	12	4/5	m4/5	MedAnterior	5	15
2	m	1	18	22	82.5613	GE1	4	400	12	4/5	m4/5	MedAnterior	5	15
2	m	1	18	23	37.5056	GE1	4	400	12	4/5	m4/5	MedAnterior	5	15
2	m	1	18	24	13.1931	GE1	4	400	12	3	m3	MedAnterior	5	14
2	m	1	18	25	37.8929	GE1	4	400	12	3	m3	MedAnterior	5	14
2	m	1	18	26	28.612	GE1	4	400	12	3	m3	MedAnterior	5	14
2	m	1	18	27	60.2967	GE1	4	400	12	2	m2	MedAnterior	5	13
2	m	1	18	28	37.8747	GE1	4	400	12	2	m2	MedAnterior	5	13
2	m	1	23	200709_1906	21.5281	GE1	4	400	2	pfl	Lpfl	Vestibular	1	1
2	m	1	23	2	38.3563	GE1	4	400	2	pfl	Lpfl	Vestibular	1	1
2	m	1	23	3	20.6223	GE1	4	400	3	pfl	Lpfl	Vestibular	1	1
2	m	1	23	4	43.9022	GE1	4	400	3	pfl	Lpfl	Vestibular	1	1
2	m	1	23	5	84.8903	GE1	4	400	3	crus2	Lcrus2	Lateral	2	5
2	m	1	23	6	45.4683	GE1	4	400	3	crus2	Lcrus2	Lateral	2	5
2	m	1	23	7	60.227	GE1	4	400	3	crus1	Lcrus1	Lateral	2	4
2	m	1	23	8	2.94602	GE1	4	400	3	crus1	Lcrus1	Lateral	2	4
2	m	1	23	9	34.1554	GE1	4	400	6	sim	isim	IntPosterior	4	7
2	m	1	23	10	63.8418	GE1	4	400	7	4/5	i4/5	IntAnterior	3	12
2	m	1	23	11	30.3583	GE1	4	400	7	cop	icop	IntPosterior	4	11
2	m	1	23	12	17.1381	GE1	4	400	5	cop	icop	IntPosterior	4	11
2	m	1	23	13	49.6357	GE1	4	400	5	pm	ipm	IntPosterior	4	10
2	m	1	23	14	49.2136	GE1	4	400	5	crus1	icrus1	IntPosterior	4	8
2	m	1	23	15	51.2354	GE1	4	400	5	crus2	icrus2	IntPosterior	4	9
2	m	1	23	16	41.1372	GE1	4	400	5	sim	isim	IntPosterior	4	7
2	m	1	23	17	18.0869	GE1	4	400	12	10	m10	MedPosterior	6	20
2	m	1	23	18	16.4388	GE1	4	400	12	10	m10	MedPosterior	6	20
2	m	1	23	19	25.4241	GE1	4	400	12	9	m9	MedPosterior	6	19
2	m	1	23	20	69.6352	GE1	4	400	12	9	m9	MedPosterior	6	19
2	m	1	23	21	70.755	GE1	4	400	12	8	m8	MedPosterior	6	18
2	m	1	23	22	25.7397	GE1	4	400	12	6	m6	MedPosterior	6	16
2	m	1	23	23	55.693	GE1	4	400	12	6	m6	MedPosterior	6	16
2	m	1	23	24	31.4023	GE1	4	400	12	6	m6	MedPosterior	6	16
2	m	1	23	25	56.7032	GE1	4	400	12	4/5	m4/5	MedAnterior	5	15
2	m	1	23	26	60.8508	GE1	4	400	12	4/5	m4/5	MedAnterior	5	15
2	m	1	23	27	44.2754	GE1	4	400	12	4/5	m4/5	MedAnterior	5	15
2	m	1	23	28	41.0876	GE1	4	400	12	3	m3	MedAnterior	5	14
2	m	1	23	29	24.9756	GE1	4	400	12	3	m3	MedAnterior	5	14
2	m	1	23	30	36.7586	GE1	4	400	12	3	m3	MedAnterior	5	14
2	m	1	23	31	41.2489	GE1	4	400	12	2	m2	MedAnterior	5	13
2	m	1	23	32	60.6298	GE1	4	400	12	2	m2	MedAnterior	5	13
2	m	1	23	33	56.015	GE1	4	400	12	2	m2	MedAnterior	5	13

## Sheet: AtmN N; Aptx+ +
AtmN/N; Aptx+/+			Total # of animals	26
Genotype	sex	sex code (1=m)	sex code (1=m)	Exp. Date_Animal ID	Average frequency	Average frequency	Group	Age	Age days	slice	folia	Position name	Region name	Gross Region ID	Position ID								1-5 vs 6-10
3	f	0	1	191204b_2155	22.3807		GE3	2	120	3	pfl	Lpfl	Vestibular	1	1		All time points		N	26									m					f
3	f	0	1	2	54.2715		GE3	2	120	3	Crus2	LCrus2	Lateral	2	5		By Position ID	average	stdev	n	sem		By major regions	average	stdev	n	sem		average	stdev	n	sem		average	stdev	n	sem
3	f	0	1	3			GE3	2	120	3	Crus1	LCrus1	Lateral	2	4		Lpfl	37.009	28.7526	28	5.43374	1	Vestibular	38.9049	#N/A	50	#N/A	1	47.6121	#N/A	32	#N/A		38.5551	#N/A	18	#N/A
3	f	0	1	4	95.501		GE3	2	120	3	Crus1	LCrus1	Lateral	2	4		Lfl	53.6967	33.4691	22	7.13563	2	Lateral	54.994	#N/A	73	#N/A	2	66.2716	#N/A	42	#N/A		69.7465	#N/A	31	#N/A
3	f	0	1	5			GE3	2	120	6				#N/A	#N/A		Lsim	64.4004	45.9933	14	12.2922	3	IntAnterior	46.3302	#N/A	10	#N/A	3	68.2253	#N/A	8	#N/A		54.3752	#N/A	2	#N/A
3	f	0	1	6			GE3	2	120	6	Crus1	iCrus1	IntPosterior	4	8		Lcrus1	53.3657	32.1026	25	6.42051	4	IntPosterior	63.0042	#N/A	90	#N/A	4	66.272	#N/A	57	#N/A		80.2704	#N/A	33	#N/A
3	f	0	1	7	100.454		GE3	2	120	6	Crus1	iCrus1	IntPosterior	4	8		Lcrus2	88.0429	59.4611	21	12.9755	5	MedAnterior	79.1706	#N/A	181	#N/A	5	82.1385	#N/A	113	#N/A		81.2242	#N/A	68	#N/A
3	f	0	1	8	81.242		GE3	2	120	6	Crus2	iCrus2	IntPosterior	4	9		Lpm	67.4849	43.2499	12	12.4852	6	MedPosterior	63.6857	#N/A	233	#N/A	6	65.6203	#N/A	147	#N/A		67.0435	#N/A	86	#N/A
3	f	0	1	9	61.5458		GE3	2	120	12	2	m2	MedAnterior	5	13		isim	64.3646	40.0619	17	9.71643	7
3	f	0	1	10	45.403		GE3	2	120	12	2	m2	MedAnterior	5	13		icrus1	80.3404	49.0282	17	11.8911	8
3	f	0	1	11	47.6686		GE3	2	120	12	3	m3	MedAnterior	5	14		icrus2	70.9514	35.8769	22	7.64898	9
3	f	0	1	12	75.3289		GE3	2	120	12	3	m3	MedAnterior	5	14		ipm	70.9476	39.5793	20	8.8502	10
3	f	0	1	13	112.237		GE3	2	120	12	3	m3	MedAnterior	5	14		icop	70.4688	43.4905	14	11.6233	11
3	f	0	1	14	39.8438		GE3	2	120	12	4/5	m4/5	MedAnterior	5	15		i4/5	66.9215	43.6237	9	14.5412	12
3	f	0	1	15	117.121		GE3	2	120	12	4/5	m4/5	MedAnterior	5	15		m2	66.9672	22.8281	51	3.19658	13
3	f	0	1	16	104.449		GE3	2	120	12	4/5	m4/5	MedAnterior	5	15		m3	81.5302	39.2678	59	5.11224	14
3	f	0	1	17	88.839		GE3	2	120	12	6	m6	MedPosterior	6	16		m4/5	92.6661	39.9168	71	4.73725	15
3	f	0	1	18	92.4089		GE3	2	120	12	6	m6	MedPosterior	6	16		m6	78.1134	35.0837	45	5.22997	16
3	f	0	1	19			GE3	2	120	12				#N/A	#N/A		m7	90.7766	50.8989	20	11.3813	17
3	f	0	1	20			GE3	2	120	12				#N/A	#N/A		m8	78.8409	33.5863	46	4.95204	18
3	f	0	1	21	97.9451		GE3	2	120	12	8	m8	MedPosterior	6	18		m9	68.4022	35.1451	68	4.26197	19
3	f	0	1	22	66.8114		GE3	2	120	12	9	m9	MedPosterior	6	19		m10	33.3938	15.2697	54	2.07794	20
3	f	0	1	23	62.6585		GE3	2	120	12	9	m9	MedPosterior	6	19
3	f	0	1	24	90.793		GE3	2	120	12	9	m9	MedPosterior	6	19
3	f	0	1	25	82.1882		GE3	2	120	12	10	m10	MedPosterior	6	20
3	f	0	1	26	31.506		GE3	2	120	12	10	m10	MedPosterior	6	20
3	m	1	2	191213a_2408			GE2	1	45	3	PFl	LPFl	Vestibular	1	1
3	m	1	2	2	68.0433		GE2	1	45	6	Cop	iCop	IntPosterior	4	11
3	m	1	2	3	73.3074		GE2	1	45	6	PM	iPM	IntPosterior	4	10
3	m	1	2	4	30.9258		GE2	1	45	12	10	m10	MedPosterior	6	20
3	m	1	2	5	28.5056		GE2	1	45	12	10	m10	MedPosterior	6	20
3	m	1	2	6	79.4867		GE2	1	45	12	9	m9	MedPosterior	6	19
3	m	1	2	7	49.1655		GE2	1	45	12	9	m9	MedPosterior	6	19
3	m	1	2	8	58.7649		GE2	1	45	12	9	m9	MedPosterior	6	19
3	m	1	2	9	73.3175		GE2	1	45	12	8	m8	MedPosterior	6	18
3	m	1	2	10			GE2	1	45	12	6	m6	MedPosterior	6	16
3	m	1	2	11	91.9631		GE2	1	45	12	4/5	m4/5	MedAnterior	5	15
3	m	1	2	12	139.973		GE2	1	45	12	4/5	m4/5	MedAnterior	5	15
3	m	1	2	13	99.5987		GE2	1	45	12	3	m3	MedAnterior	5	14
3	m	1	2	14	145.318		GE2	1	45	12	3	m3	MedAnterior	5	14
3	m	1	2	15	89.8242		GE2	1	45	12	2	m2	MedAnterior	5	13		GE2	45 days	N	7									m					f
3	m	1	2	16	100.717		GE2	1	45	12	2	m2	MedAnterior	5	13		By Position ID	average	stdev	n	sem		By major regions	average	stdev	n	sem		average	stdev	n	sem		average	stdev	n	sem
3	m	1	3	191213b_2407	16.8982		GE2	1	45	3	PFl	LPFl	Vestibular	1	1		Lpfl	33.2181	26.4299	10	8.35785		Vestibular	40.1706	#N/A	12	#N/A		45.973	#N/A	5	#N/A		36.026	#N/A	7	#N/A
3	m	1	3		62.5748		GE2	1	45	3	PFl	LPFl	Vestibular	1	1		Lfl	74.933	15.1794	2	10.7335		Lateral	65.144	#N/A	19	#N/A		69.8744	#N/A	7	#N/A		62.3846	#N/A	12	#N/A
3	m	1	3		84.1536		GE2	1	45	3	PM	LPM	Lateral	2	6		Lsim	52.6176	41.0255	3	23.6861		IntAnterior	55.0989	#N/A	3	#N/A		64.231	#N/A	2	#N/A		36.8348	#N/A	1	#N/A
3	m	1	3				GE2	1	45	3	Crus2	LCrus2	Lateral	2	5		Lcrus1	53.7705	31.1212	7	11.7627		IntPosterior	84.1784	#N/A	21	#N/A		77.1209	#N/A	11	#N/A		91.9415	#N/A	10	#N/A
3	m	1	3		57.6156		GE2	1	45	3	crus1	Lcrus1	Lateral	2	4		Lcrus2	78.9947	58.0643	5	25.9671		MedAnterior	88.5322	#N/A	44	#N/A		100.718	#N/A	26	#N/A		70.9307	#N/A	18	#N/A
3	m	1	3		74.3085		GE2	1	45	3	crus1	Lcrus1	Lateral	2	4		Lpm	77.1291	39.3425	4	19.6713		MedPosterior	67.3367	#N/A	56	#N/A		71.7445	#N/A	34	#N/A		60.5246	#N/A	22	#N/A
3	m	1	3		15.6286		GE2	1	45	6	Sim	iSim	IntPosterior	4	7		isim	90.4876	43.9738	5	19.6657
3	m	1	3				GE2	1	45	6	Crus1	iCrus1	IntPosterior	4	8		icrus1	110.017	96.6594	2	68.3485
3	m	1	3		102.402		GE2	1	45	6	Cop	iCop	IntPosterior	4	11		icrus2	73.1959	52.0001	4	26.0001
3	m	1	3		57.8063		GE2	1	45	12	2	m2	MedAnterior	5	13		ipm	69.0798	36.2127	5	16.1948
3	m	1	3		118.201		GE2	1	45	12	2	m2	MedAnterior	5	13		icop	91.4183	30.5911	5	13.6807
3	m	1	3				GE2	1	45	12	3	m3	MedAnterior	5	14		i4/5	56.5185	38.1081	2	26.9465
3	m	1	3		178.145		GE2	1	45	12	3	m3	MedAnterior	5	14		m2	70.4277	24.0351	13	6.66613
3	m	1	3				GE2	1	45	12	3	m3		#N/A	14		m3	100.479	52.8877	12	15.2674
3	m	1	3		64.0173		GE2	1	45	12	4/5	m4/5	MedAnterior	5	15		m4/5	93.3738	36.3854	19	8.34739
3	m	1	3		74.4023		GE2	1	45	12	4/5	m4/5	MedAnterior	5	15		m6	67.0257	37.876	10	11.9775
3	m	1	3		88.1895		GE2	1	45	12	4/5	m4/5	MedAnterior	5	15		m7	99.1662	58.6133	4	29.3066
3	m	1	3		44.6317		GE2	1	45	12	6	m6	MedPosterior	6	16		m8	79.1297	37.1485	13	10.3031
3	m	1	3		43.249		GE2	1	45	12	6	m6	MedPosterior	6	16		m9	80.6764	50.9005	16	12.7251
3	m	1	3		152.867		GE2	1	45	12	7	m7	MedPosterior	6	17		m10	29.5712	7.69455	13	2.13408
3	m	1	3		138.073		GE2	1	45	12	8	m8	MedPosterior	6	18
3	m	1	3		39.4687		GE2	1	45	12	8	m8	MedPosterior	6	18
3	m	1	3				GE2	1	45	12				#N/A	#N/A
3	m	1	3		124.91		GE2	1	45	12	9	m9	MedPosterior	6	19
3	m	1	3		160.538		GE2	1	45	12	9	m9	MedPosterior	6	19
3	m	1	3		40.2841		GE2	1	45	12	10	m10	MedPosterior	6	20
3	m	1	3		26.196		GE2	1	45	12	10	m10	MedPosterior	6	20
3	m	1	4	200113_1923	32.4618		GE4	3	210	2	Fl	LFl	Vestibular	1	2
3	m	1	4		81.7897		GE4	3	210	2	Fl	LFl	Vestibular	1	2
3	m	1	4		34.5585		GE4	3	210	2	Fl	LFl	Vestibular	1	2
3	m	1	4		147.864		GE4	3	210	3	Sim	LSim	Lateral	2	3
3	m	1	4		43.7584		GE4	3	210	3	sim	Lsim	Lateral	2	3
3	m	1	4				GE4	3	210	3	crus1	Lcrus1	Lateral	2	4
3	m	1	4		127.614		GE4	3	210	3	crus2	Lcrus2	Lateral	2	5
3	m	1	4		21.2624		GE4	3	210	3	PM	LPM	Lateral	2	6
3	m	1	4		51.0818		GE4	3	210	3	cop	Lcop	lateral	2	#N/A
3	m	1	4		67.9291		GE4	3	210	6	cop	icop	IntPosterior	4	11
3	m	1	4		24.3443		GE4	3	210	6	pm	ipm	IntPosterior	4	10
3	m	1	4		45.5389		GE4	3	210	6	crus2	icrus2	IntPosterior	4	9
3	m	1	4		67.7941		GE4	3	210	6	crus1	icrus1	IntPosterior	4	8		GE3	120 days	N	6									m	N	5			f	N	1
3	m	1	4		53.1817		GE4	3	210	11	2	m2	MedAnterior	5	13		By Position ID	average	stdev	n	sem		By major regions	average	stdev	n	sem		average	stdev	n	sem		average	stdev	n	sem
3	m	1	4		60.2433		GE4	3	210	11	2	m2	MedAnterior	5	13		Lpfl	28.6087	22.7103	4	11.3551		Vestibular	41.9342	#N/A	6	#N/A		45.8449	#N/A	5	#N/A		22.3807	#N/A	1	#N/A
3	m	1	4				GE4	3	210	11	3	m3	MedAnterior	5	14		Lfl	68.5852	61.4067	2	43.4211		Lateral	53.5729	#N/A	14	#N/A		50.0207	#N/A	12	#N/A		74.8863	#N/A	2	#N/A
3	m	1	4		115.877		GE4	3	210	11	3	m3	MedAnterior	5	14		Lsim	67.9148	36.1008	4	18.0504		IntAnterior	113.312	#N/A	2	#N/A		113.312	#N/A	2	#N/A		#DIV/0!	#N/A	0	#N/A
3	m	1	4		114.531		GE4	3	210	11	4/5	m4/5	MedAnterior	5	15		Lcrus1	42.6143	38.117	5	17.0464		IntPosterior	67.8155	#N/A	21	#N/A		65.3911	#N/A	19	#N/A		90.848	#N/A	2	#N/A
3	m	1	4		96.015		GE4	3	210	11	4/5	m4/5	MedAnterior	5	15		Lcrus2	42.4927	24.0067	4	12.0034		MedAnterior	75.5933	#N/A	46	#N/A		75.6235	#N/A	38	#N/A		75.4496	#N/A	8	#N/A
3	m	1	4		132.171		GE4	3	210	11	4/5	m4/5	MedAnterior	5	15		Lpm	95.3194	67.401	1	67.401		MedPosterior	65.0602	#N/A	52	#N/A		62.9541	#N/A	44	#N/A		76.6438	#N/A	8	#N/A
3	m	1	4		190.333		GE4	3	210	11	6	m6	MedPosterior	6	16		isim	47.974	22.4938	4	11.2469
3	m	1	4		86.2859		GE4	3	210	11	6	m6	MedPosterior	6	16		icrus1	74.5292	51.5196	5	23.0403
3	m	1	4				GE4	3	210	11	7	m7	MedPosterior	6	17		icrus2	70.7397	39.6143	7	14.9728
3	m	1	4		94.9331		GE4	3	210	11	8	m8	MedPosterior	6	18		ipm	77.8147	44.6524	3	25.7801
3	m	1	4		54.2984		GE4	3	210	11	8	m8	MedPosterior	6	18		icop	65.4809	45.064	2	31.8651
3	m	1	4		78.4686		GE4	3	210	11	9	m9	MedPosterior	6	19		i4/5	113.312	53.937	2	38.1392
3	m	1	4		52.5378		GE4	3	210	11	9	m9	MedPosterior	6	19		m2	63.8129	20.679	12	5.96951
3	m	1	4		65.7422		GE4	3	210	11	9	m9	MedPosterior	6	19		m3	77.1212	25.8256	17	6.26363
3	m	1	4		55.8574		GE4	3	210	11	10	m10	MedPosterior	6	20		m4/5	82.381	34.5401	17	8.3772
3	m	1	4		24.682		GE4	3	210	11	10	m10	MedPosterior	6	20		m6	80.843	23.029	12	6.64791
3	m	1	5	200131_2303	17.2006		GE3	2	120	3	PFl	LPFl	Vestibular	1	1		m7	95.6086	64.0702	4	32.0351
3	m	1	5				GE3	2	120	3	PFl	LPFl	Vestibular	1	1		m8	68.5572	21.8893	9	7.29642
3	m	1	5		115.519		GE3	2	120	3	Fl	LFl	Vestibular	1	2		m9	63.5359	23.3434	15	6.02723
3	m	1	5		55.1946		GE3	2	120	3	sim	Lsim	Lateral	2	3		m10	38.3773	24.5096	12	7.07531
3	m	1	5		4.92941		GE3	2	120	3	crus1	Lcrus1	Lateral	2	4
3	m	1	5		59.6773		GE3	2	120	3	crus2	Lcrus2	Lateral	2	5
3	m	1	5				GE3	2	120	3	PM	LPM	Lateral	2	6
3	m	1	5		47.4353		GE3	2	120	6	sim	isim	IntPosterior	4	7
3	m	1	5		77.4499		GE3	2	120	6	crus2	icrus2	IntPosterior	4	9
3	m	1	5		51.6642		GE3	2	120	12	2	m2	MedAnterior	5	13
3	m	1	5		54.6287		GE3	2	120	12	2	m2	MedAnterior	5	13
3	m	1	5		40.1039		GE3	2	120	12	3	m3	MedAnterior	5	14
3	m	1	5		126.539		GE3	2	120	12	3	m3	MedAnterior	5	14
3	m	1	5		101.331		GE3	2	120	12	3	m3	MedAnterior	5	14
3	m	1	5		25.4714		GE3	2	120	12	4/5	m4/5	MedAnterior	5	15
3	m	1	5		133.294		GE3	2	120	12	4/5	m4/5	MedAnterior	5	15
3	m	1	5		81.5129		GE3	2	120	12	4/5	m4/5	MedAnterior	5	15
3	m	1	5		101.393		GE3	2	120	12	6	m6	MedPosterior	6	16
3	m	1	5		67.9756		GE3	2	120	12	6	m6	MedPosterior	6	16
3	m	1	5		91.828		GE3	2	120	12	7	m7	MedPosterior	6	17
3	m	1	5		85.795		GE3	2	120	12	8	m8	MedPosterior	6	18
3	m	1	5		54.1586		GE3	2	120	12	8	m8	MedPosterior	6	18
3	m	1	5		57.5116		GE3	2	120	12	9	m9	MedPosterior	6	19		GE4	210 days	N	6									m	N	3			f	N	3
3	m	1	5		60.1541		GE3	2	120	12	9	m9	MedPosterior	6	19		By Position ID	average	stdev	n	sem		By major regions	average	stdev	n	sem		average	stdev	n	sem		average	stdev	n	sem
3	m	1	5		35.8873		GE3	2	120	12	9	m9	MedPosterior	6	19		Lpfl	31.2395	25.609	4	12.8045		Vestibular	37.3317	#N/A	9	#N/A		46.8999	#N/A	5	#N/A		25.3715	#N/A	4	#N/A
3	m	1	5		26.8466		GE3	2	120	12	10	m10	MedPosterior	6	20		Lfl	42.2054	28.9726	5	12.9569		Lateral	83.0799	#N/A	15	#N/A		76.5738	#N/A	7	#N/A		88.7728	#N/A	8	#N/A
3	m	1	5		23.214		GE3	2	120	12	10	m10	MedPosterior	6	20		Lsim	82.3417	54.9331	5	24.5668		IntAnterior	#DIV/0!	#N/A	0	#N/A		#DIV/0!	#N/A	0	#N/A		#DIV/0!	#N/A	0	#N/A
3	m	1	6	200205a_2319			GE3	2	120	3	Fl	LFl	Vestibular	1	2		Lcrus1	52.1632	39.195	2	27.7151		IntPosterior	67.615	#N/A	18	#N/A		52.4322	#N/A	7	#N/A		77.2768	#N/A	11	#N/A
3	m	1	6		14.148		GE3	2	120	3	PFl	LPFl	Vestibular	1	1		Lcrus2	117.364	80.0912	5	35.8179		MedAnterior	85.8196	#N/A	39	#N/A		82.5503	#N/A	19	#N/A		88.9255	#N/A	20	#N/A
3	m	1	6		55.0108		GE3	2	120	3	crus1	Lcrus1	Lateral	2	4		Lpm	46.1307	36.4387	2	25.766		MedPosterior	74.3212	#N/A	55	#N/A		72.1272	#N/A	26	#N/A		76.2882	#N/A	29	#N/A
3	m	1	6		2.62807		GE3	2	120	3	crus1	Lcrus1	Lateral	2	4		isim	37.4428	22.198	3	12.816
3	m	1	6		43.7083		GE3	2	120	6	sim	isim	IntPosterior	4	7		icrus1	64.4442	22.3138	4	11.1569
3	m	1	6		111.552		GE3	2	120	6	crus2	icrus2	IntPosterior	4	9		icrus2	68.2273	20.9965	4	10.4982
3	m	1	6		70.0674		GE3	2	120	6	PM	iPM	IntPosterior	4	10		ipm	76.3658	51.42	5	22.9957
3	m	1	6		79.9397		GE3	2	120	12	2	m2	MedAnterior	5	13		icop	96.1134	60.0735	2	42.4784
3	m	1	6		66.391		GE3	2	120	12	2	m2	MedAnterior	5	13		i4/5	#DIV/0!	0	0	#DIV/0!
3	m	1	6		76.2427		GE3	2	120	12	3	m3	MedAnterior	5	14		m2	70.2025	29.1823	12	8.4242
3	m	1	6		61.4109		GE3	2	120	12	3	m3	MedAnterior	5	14		m3	83.1147	46.2932	11	13.9579
3	m	1	6		54.0406		GE3	2	120	12	3	m3	MedAnterior	5	14		m4/5	99.3921	51.7907	16	12.9477
3	m	1	6		82.6422		GE3	2	120	12	4/5	m4/5	MedAnterior	5	15		m6	94.1409	50.1585	11	15.1234
3	m	1	6		132.434		GE3	2	120	12	4/5	m4/5	MedAnterior	5	15		m7	110.01	50.7844	5	22.7115
3	m	1	6		89.1375		GE3	2	120	12	4/5	m4/5	MedAnterior	5	15		m8	98.8692	50.1975	10	15.8738
3	m	1	6		90.9199		GE3	2	120	12	6	m6	MedPosterior	6	16		m9	65.023	26.0675	17	6.3223
3	m	1	6		38.8972		GE3	2	120	12	6	m6	MedPosterior	6	16		m10	33.9986	12.1647	12	3.51164
3	m	1	6		163.82		GE3	2	120	12	7	m7	MedPosterior	6	17
3	m	1	6		50.4802		GE3	2	120	12	8	m8	MedPosterior	6	18
3	m	1	6		50.8251		GE3	2	120	12	9	m9	MedPosterior	6	19
3	m	1	6		41.2865		GE3	2	120	12	10	m10	MedPosterior	6	20
3	m	1	6		14.5304		GE3	2	120	12	10	m10	MedPosterior	6	20
3	m	1	7	200205b_2321	60.7057		GE3	2	120	3	PFl	LPFl	Vestibular	1	1
3	m	1	7		29.092		GE3	2	120	3	sim	Lsim	Lateral	2	3
3	m	1	7		95.3194		GE3	2	120	3	PM	LPM	Lateral	2	6
3	m	1	7		40.9551		GE3	2	120	5	cop	icop	IntPosterior	4	11
3	m	1	7		104.089		GE3	2	120	5	crus2	icrus2	IntPosterior	4	9
3	m	1	7		17.3075		GE3	2	120	5	crus2	icrus2	IntPosterior	4	9
3	m	1	7		49.0721		GE3	2	120	5	crus1	icrus1	IntPosterior	4	8
3	m	1	7		137.533		GE3	2	120	5	crus1	icrus1	IntPosterior	4	8
3	m	1	7		151.451		GE3	2	120	5	4/5	i4/5	IntAnterior	3	12
3	m	1	7		47.177		GE3	2	120	12	2	m2	MedAnterior	5	13
3	m	1	7		121.961		GE3	2	120	12	2	m2	MedAnterior	5	13
3	m	1	7		114.842		GE3	2	120	12	3	m3	MedAnterior	5	14
3	m	1	7		84.95		GE3	2	120	12	3	m3	MedAnterior	5	14
3	m	1	7		86.0035		GE3	2	120	12	4/5	m4/5	MedAnterior	5	15
3	m	1	7		114.985		GE3	2	120	12	4/5	m4/5	MedAnterior	5	15		GE1	400 days	N	7									m	N	4			f	N	3
3	m	1	7		83.0022		GE3	2	120	12	4/5	m4/5	MedAnterior	5	15		By Position ID	average	stdev	n	sem		By major regions	average	stdev	n	sem		average	stdev	n	sem		average	stdev	n	sem
3	m	1	7		91.7476		GE3	2	120	12	6	m6	MedPosterior	6	16		Lpfl	46.4678	32.5541	10	10.2945		Vestibular	49.9105	#N/A	23	#N/A		48.8235	#N/A	17	#N/A		52.9904	#N/A	6	#N/A
3	m	1	7		52.5393		GE3	2	120	12	6	m6	MedPosterior	6	16		Lfl	52.5587	31.6556	13	8.7797		Lateral	68.4637	#N/A	25	#N/A		72.3763	#N/A	16	#N/A		61.5081	#N/A	9	#N/A
3	m	1	7		97.7761		GE3	2	120	12	7	m7	MedPosterior	6	17		Lsim	30.1922	25.8183	2	18.2563		IntAnterior	52.5264	#N/A	5	#N/A		47.6792	#N/A	4	#N/A		71.9155	#N/A	1	#N/A
3	m	1	7		51.362		GE3	2	120	12	8	m8	MedPosterior	6	18		Lcrus1	58.2137	25.6197	11	7.72463		IntPosterior	67.2496	#N/A	30	#N/A		65.986	#N/A	20	#N/A		69.7769	#N/A	10	#N/A
3	m	1	7		100.26		GE3	2	120	12	9	m9	MedPosterior	6	19		Lcrus2	99.591	56.9123	7	21.5108		MedAnterior	78.5621	#N/A	52	#N/A		74.0281	#N/A	30	#N/A		84.7448	#N/A	22	#N/A
3	m	1	7		51.2137		GE3	2	120	12	9	m9	MedPosterior	6	19		Lpm	62.7443	49.3946	5	22.0899		MedPosterior	59.5754	#N/A	70	#N/A		59.5718	#N/A	43	#N/A		59.5811	#N/A	27	#N/A
3	m	1	7		89.9444		GE3	2	120	12	10	m10	MedPosterior	6	20		isim	67.5072	41.6486	5	18.6258
3	m	1	7		18.1728		GE3	2	120	12	10	m10	MedPosterior	6	20		icrus1	85.8884	39.5942	6	16.1643
3	m	1	8	200220_2118	28.2083		GE4	3	210	3	PFl	LPFl	Vestibular	1	1		icrus2	71.4373	35.1407	7	13.2819
3	m	1	8		73.4378		GE4	3	210	3	sim	Lsim	Lateral	2	3		ipm	65.4684	37.2595	7	14.0828
3	m	1	8		70.999		GE4	3	210	3	PM	LPM	Lateral	2	6		icop	41.2566	27.4303	5	12.2672
3	m	1	8				GE4	3	210	6	sim	isim	IntPosterior	4	7		i4/5	52.5264	17.2745	5	7.72541
3	m	1	8		60.2315		GE4	3	210	6	crus2	icrus2	IntPosterior	4	9		m2	63.6846	18.6072	14	4.97297
3	m	1	8		73.1417		GE4	3	210	6	PM	iPM	IntPosterior	4	10		m3	72.5898	34.7003	19	7.96079
3	m	1	8		51.1972		GE4	3	210	12	2	m2	MedAnterior	5	13		m4/5	95.4969	36.8019	19	8.44294
3	m	1	8		87.3781		GE4	3	210	12	2	m2	MedAnterior	5	13		m6	69.9317	13.6997	12	3.95476
3	m	1	8		60.163		GE4	3	210	12	3	m3	MedAnterior	5	14		m7	69.4834	43.3455	7	16.3831
3	m	1	8		62.2385		GE4	3	210	12	3	m3	MedAnterior	5	14		m8	70.8777	15.8107	14	4.22559
3	m	1	8		20.3203		GE4	3	210	12	4/5	m4/5	MedAnterior	5	15		m9	65.1048	34.3165	20	7.67341
3	m	1	8				GE4	3	210	12	4/5	m4/5	MedAnterior	5	15		m10	32.3723	13.4661	17	3.26602
3	m	1	8		76.8772		GE4	3	210	12	4/5	m4/5	MedAnterior	5	15
3	m	1	8		60.22		GE4	3	210	12	6	m6	MedPosterior	6	16
3	m	1	8				GE4	3	210	12	6	m6	MedPosterior	6	16
3	m	1	8		121.219		GE4	3	210	12	7	m7	MedPosterior	6	17
3	m	1	8				GE4	3	210	12	8	m8	MedPosterior	6	18
3	m	1	8		88.301		GE4	3	210	12	9	m9	MedPosterior	6	19
3	m	1	8		87.8693		GE4	3	210	12	9	m9	MedPosterior	6	19
3	m	1	8		49.3863		GE4	3	210	12	9	m9	MedPosterior	6	19
3	m	1	8		32.3062		GE4	3	210	12	10	m10	MedPosterior	6	20
3	m	1	8		10.9183		GE4	3	210	12	10	m10	MedPosterior	6	20
3	m	1	9	200227_2573	56.0466		GE2	1	45	3	Crus1	LCrus1	Lateral	2	4
3	m	1	9	2	7.41151		GE2	1	45	3	PFl	LPFl	Vestibular	1	1
3	m	1	9	3	76.2021		GE2	1	45	6	4/5	i4/5	IntAnterior	3	12
3	m	1	9	4	115.073		GE2	1	45	6	sim	isim	IntPosterior	4	7
3	m	1	9	5	37.1574		GE2	1	45	6	Crus1	iCrus1	IntPosterior	4	8
3	m	1	9	6	43.2692		GE2	1	45	6	Crus2	iCrus2	IntPosterior	4	9
3	m	1	9	7	142.153		GE2	1	45	6	Crus2	iCrus2	IntPosterior	4	9
3	m	1	9	8	104.828		GE2	1	45	6	PM	iPM	IntPosterior	4	10
3	m	1	9	9	137.417		GE2	1	45	6	cop	icop	IntPosterior	4	11
3	m	1	9	10	67.7455		GE2	1	45	11	2	m2	MedAnterior	5	13
3	m	1	9	11	53.272		GE2	1	45	11	2	m2	MedAnterior	5	13
3	m	1	9	12	72.1202		GE2	1	45	11	3	m3	MedAnterior	5	14
3	m	1	9	13	78.8855		GE2	1	45	11	3	m3	MedAnterior	5	14
3	m	1	9	14	109.625		GE2	1	45	11	4/5	m4/5	MedAnterior	5	15
3	m	1	9	15	131.393		GE2	1	45	11	4/5	m4/5	MedAnterior	5	15
3	m	1	9	16	131.896		GE2	1	45	11	4/5	m4/5	MedAnterior	5	15
3	m	1	9	17	78.1572		GE2	1	45	11	6	m6	MedPosterior	6	16
3	m	1	9	18	70.6618		GE2	1	45	11	6	m6	MedPosterior	6	16
3	m	1	9	19	85.0342		GE2	1	45	11	7	m7	MedPosterior	6	17
3	m	1	9	20	70.4641		GE2	1	45	11	8	m8	MedPosterior	6	18
3	m	1	9	21	94.729		GE2	1	45	11	8	m8	MedPosterior	6	18
3	m	1	9	22	66.2234		GE2	1	45	11	9	m9	MedPosterior	6	19
3	m	1	9	23	192.349		GE2	1	45	11	9	m9	MedPosterior	6	19
3	m	1	9	24	47.7418		GE2	1	45	11	9	m9	MedPosterior	6	19
3	m	1	9	25	41.6276		GE2	1	45	11	10	m10	MedPosterior	6	20
3	m	1	9	26	34.7441		GE2	1	45	11	10	m10	MedPosterior	6	20
3	m	1	10	200228_2577	69.2009		GE2	1	45	3	PFl	LPFl	Vestibular	1	1
3	m	1	10	2	73.7795		GE2	1	45	3	PFl	LPFl	Vestibular	1	1
3	m	1	10	3	48.7332		GE2	1	45	3	PM	LPM	Lateral	2	6
3	m	1	10	4	141.312		GE2	1	45	3	Crus2	LCrus2	Lateral	2	5
3	m	1	10	5	26.9511		GE2	1	45	3	Crus1	LCrus1	Lateral	2	4
3	m	1	10	6			GE2	1	45	3	sim	Lsim	Lateral	2	3
3	m	1	10	7	9.05056		GE2	1	45	7	PM	iPM	IntPosterior	4	10
3	m	1	10	8			GE2	1	45	7	4/5	i4/5	IntAnterior	3	12
3	m	1	10	9	52.2598		GE2	1	45	7	3	i3	intanterior
3	m	1	10	10	54.7343		GE2	1	45	12	2	m2	MedAnterior	5	13
3	m	1	10	11	87.5778		GE2	1	45	12	2	m2	MedAnterior	5	13
3	m	1	10	12	126.988		GE2	1	45	12	3	m3	MedAnterior	5	14
3	m	1	10	13	95.4213		GE2	1	45	12	3	m3	MedAnterior	5	14
3	m	1	10	14	128.175		GE2	1	45	12	4/5	m4/5	MedAnterior	5	15
3	m	1	10	15	146.671		GE2	1	45	12	4/5	m4/5	MedAnterior	5	15
3	m	1	10	16	86.0043		GE2	1	45	12	4/5	m4/5	MedAnterior	5	15
3	m	1	10	17	93.9554		GE2	1	45	12	6	m6	MedPosterior	6	16
3	m	1	10	18	111.072		GE2	1	45	12	7	m7	MedPosterior	6	17
3	m	1	10	19	48.8269		GE2	1	45	12	8	m8	MedPosterior	6	18
3	m	1	10	20	85.2773		GE2	1	45	12	8	m8	MedPosterior	6	18
3	m	1	10	21	83.3569		GE2	1	45	12	9	m9	MedPosterior	6	19
3	m	1	10	22	89.9234		GE2	1	45	12	9	m9	MedPosterior	6	19
3	m	1	10	23	15.8208		GE2	1	45	12	9	m9	MedPosterior	6	19
3	m	1	10	24	25.1245		GE2	1	45	12	10	m10	MedPosterior	6	20
3	m	1	10	25	13.8386		GE2	1	45	12	10	m10	MedPosterior	6	20
3	m	1	11	200302_2151			GE4	3	210	3	pfl	Lpfl	Vestibular	1	1
3	m	1	11	2	57.4812		GE4	3	210	3	fl	Lfl	Vestibular	1	2
3	m	1	11	3			GE4	3	210	3	Pm	LPm	Lateral	2	6
3	m	1	11	4			GE4	3	210	6	4/5	i4/5	IntAnterior	3	12
3	m	1	11	5	28.0457		GE4	3	210	6	PM	iPM	IntPosterior	4	10
3	m	1	11	6	24.8248		GE4	3	210	12	10	m10	MedPosterior	6	20
3	m	1	11	7	41.6965		GE4	3	210	12	10	m10	MedPosterior	6	20
3	m	1	11	8	50.9963		GE4	3	210	12	9	m9	MedPosterior	6	19
3	m	1	11	9	92.3903		GE4	3	210	12	9	m9	MedPosterior	6	19
3	m	1	11	10	26.1411		GE4	3	210	12	9	m9	MedPosterior	6	19
3	m	1	11	11	91.5769		GE4	3	210	12	8	m8	MedPosterior	6	18
3	m	1	11	12	203.019		GE4	3	210	12	8	m8	MedPosterior	6	18
3	m	1	11	13	83.0214		GE4	3	210	12	7	m7	MedPosterior	6	17
3	m	1	11	14	30.125		GE4	3	210	12	6	m6	MedPosterior	6	16
3	m	1	11	15	78.1572		GE4	3	210	12	6	m6	MedPosterior	6	16
3	m	1	11	16	177.917		GE4	3	210	12	4/5	m4/5	MedAnterior	5	15
3	m	1	11	17	118.041		GE4	3	210	12	4/5	m4/5	MedAnterior	5	15
3	m	1	11	18	39.635		GE4	3	210	12	4/5	m4/5	MedAnterior	5	15
3	m	1	11	19	74.8502		GE4	3	210	12	3	m3	MedAnterior	5	14
3	m	1	11	20	66.7362		GE4	3	210	12	3	m3	MedAnterior	5	14
3	m	1	11	21	80.0279		GE4	3	210	12	2	m2	MedAnterior	5	13
3	m	1	11	22	81.0543		GE4	3	210	12	2	m2	MedAnterior	5	13
3	m	1	12	200303a_1266	7.09621		GE1	4	400	3	pfl	Lpfl	Vestibular	1	1
3	m	1	12		54.0747		GE1	4	400	3	fl	Lfl	Vestibular	1	2
3	m	1	12		46.0633		GE1	4	400	3	fl	Lfl	Vestibular	1	2
3	m	1	12				GE1	4	400	3	pm	Lpm	Lateral	2	6
3	m	1	12		68.6708		GE1	4	400	3	pm	Lpm	Lateral	2	6
3	m	1	12		153.637		GE1	4	400	3	crus2	Lcrus2	Lateral	2	5
3	m	1	12		121.186		GE1	4	400	3	crus2	Lcrus2	Lateral	2	5
3	m	1	12		32.1353		GE1	4	400	3	crus1	Lcrus1	Lateral	2	4
3	m	1	12		49.7361		GE1	4	400	6	pm	ipm	IntPosterior	4	10
3	m	1	12		60.6388		GE1	4	400	6	crus2	icrus2	IntPosterior	4	9
3	m	1	12		52.3779		GE1	4	400	6	crus1	icrus1	IntPosterior	4	8
3	m	1	12				GE1	4	400	6	sim	isim	IntPosterior	4	7
3	m	1	12		48.6419		GE1	4	400	6	4/5	i4/5	IntAnterior	3	12
3	m	1	12		62.7126		GE1	4	400	12	2	m2	MedAnterior	5	13
3	m	1	12		78.0672		GE1	4	400	12	2	m2	MedAnterior	5	13
3	m	1	12		99.1421		GE1	4	400	12	3	m3	MedAnterior	5	14
3	m	1	12		38.9477		GE1	4	400	12	3	m3	MedAnterior	5	14
3	m	1	12		65.0682		GE1	4	400	12	4/5	m4/5	MedAnterior	5	15
3	m	1	12		95.6376		GE1	4	400	12	4/5	m4/5	MedAnterior	5	15
3	m	1	12		107.948		GE1	4	400	12	4/5	m4/5	MedAnterior	5	15
3	m	1	12		67.2829		GE1	4	400	12	6	m6	MedPosterior	6	16
3	m	1	12		90.7888		GE1	4	400	12	6	m6	MedPosterior	6	16
3	m	1	12		80.233		GE1	4	400	12	7	m7	MedPosterior	6	17
3	m	1	12		68.8239		GE1	4	400	12	8	m8	MedPosterior	6	18
3	m	1	12		58.0331		GE1	4	400	12	8	m8	MedPosterior	6	18
3	m	1	12		51.4282		GE1	4	400	12	9	m9	MedPosterior	6	19
3	m	1	12		75.2086		GE1	4	400	12	9	m9	MedPosterior	6	19
3	m	1	12		64.5047		GE1	4	400	12	9	m9	MedPosterior	6	19
3	m	1	12		20.5756		GE1	4	400	12	10	m10	MedPosterior	6	20
3	m	1	12		65.8348		GE1	4	400	12	10	m10	MedPosterior	6	20
3	f	0	13	200304_1306	13.8456		GE1	4	400	3	fl	Lfl	Vestibular	1	2
3	f	0	13		35.5157		GE1	4	400	3	fl	Lfl	Vestibular	1	2
3	f	0	13		59.7521		GE1	4	400	3	pfl	Lpfl	Vestibular	1	1
3	f	0	13		107.162		GE1	4	400	3	pm	Lpm	Lateral	2	6
3	f	0	13		61.0818		GE1	4	400	3	crus2	Lcrus2	Lateral	2	5
3	f	0	13		49.2423		GE1	4	400	3	crus1	Lcrus1	Lateral	2	4
3	f	0	13		35.9252		GE1	4	400	3	crus1	Lcrus1	Lateral	2	4
3	f	0	13		90.3822		GE1	4	400	6	crus1	icrus1	IntPosterior	4	8
3	f	0	13		37.0733		GE1	4	400	6	crus2	icrus2	IntPosterior	4	9
3	f	0	13		47.8507		GE1	4	400	12	2	m2	MedAnterior	5	13
3	f	0	13		73.0467		GE1	4	400	12	2	m2	MedAnterior	5	13
3	f	0	13		46.5506		GE1	4	400	12	3	m3	MedAnterior	5	14
3	f	0	13		191.464		GE1	4	400	12	3	m3	MedAnterior	5	14
3	f	0	13		48.8878		GE1	4	400	12	3	m3	MedAnterior	5	14
3	f	0	13		175.042		GE1	4	400	12	4/5	m4/5	MedAnterior	5	15
3	f	0	13		154.363		GE1	4	400	12	4/5	m4/5	MedAnterior	5	15
3	f	0	13		92.6534		GE1	4	400	11	8	m8	MedPosterior	6	18
3	f	0	13		70.2535		GE1	4	400	11	8	m8	MedPosterior	6	18
3	f	0	13		62.7473		GE1	4	400	11	9	m9	MedPosterior	6	19
3	f	0	13		168.036		GE1	4	400	11	9	m9	MedPosterior	6	19
3	f	0	13		76.4924		GE1	4	400	11	9	m9	MedPosterior	6	19
3	f	0	13		49.4392		GE1	4	400	11	10	m10	MedPosterior	6	20
3	f	0	13		46.0374		GE1	4	400	11	10	m10	MedPosterior	6	20
3	f	0	14	200305a_1262	86.7939		GE1	4	400	3	fl	Lfl	Vestibular	1	2
3	f	0	14		32.5634		GE1	4	400	3	crus1	Lcrus1	Lateral	2	4
3	f	0	14		35.742		GE1	4	400	6	crus1	icrus1	IntPosterior	4	8
3	f	0	14				GE1	4	400	6	pm	ipm	IntPosterior	4	10
3	f	0	14		33.5392		GE1	4	400	6	cop	icop	IntPosterior	4	11
3	f	0	14		56.996		GE1	4	400	11	2	m2	MedAnterior	5	13
3	f	0	14		98.3824		GE1	4	400	11	2	m2	MedAnterior	5	13
3	f	0	14		82.4383		GE1	4	400	11	3	m3	MedAnterior	5	14
3	f	0	14		101.483		GE1	4	400	11	3	m3	MedAnterior	5	14
3	f	0	14		80.8622		GE1	4	400	11	4/5	m4/5	MedAnterior	5	15
3	f	0	14		99.2218		GE1	4	400	11	4/5	m4/5	MedAnterior	5	15
3	f	0	14		93.3554		GE1	4	400	11	4/5	m4/5	MedAnterior	5	15
3	f	0	14		50.4333		GE1	4	400	11	6	m6	MedPosterior	6	16
3	f	0	14		71.9402		GE1	4	400	11	6	m6	MedPosterior	6	16
3	f	0	14		14.5968		GE1	4	400	11	7	m7	MedPosterior	6	17
3	f	0	14		92.2662		GE1	4	400	11	8	m8	MedPosterior	6	18
3	f	0	14		90.1197		GE1	4	400	11	8	m8	MedPosterior	6	18
3	f	0	14		45.4872		GE1	4	400	11	9	m9	MedPosterior	6	19
3	f	0	14		53.7501		GE1	4	400	11	9	m9	MedPosterior	6	19
3	f	0	14		18.0757		GE1	4	400	11	9	m9	MedPosterior	6	19
3	f	0	14		23.4542		GE1	4	400	11	10	m10	MedPosterior	6	20
3	f	0	14		24.8465		GE1	4	400	11	10	m10	MedPosterior	6	20
3	f	0	15	200309_2597	35.5806		GE2	1	45	3	pfl	Lpfl	Vestibular	1	1
3	f	0	15		9.48919		GE2	1	45	3	pfl	Lpfl	Vestibular	1	1
3	f	0	15				GE2	1	45	3	sim	Lsim	Lateral	2	3
3	f	0	15		87.0726		GE2	1	45	3	crus1	Lcrus1	Lateral	2	4
3	f	0	15		130.538		GE2	1	45	3	crus2	Lcrus2	Lateral	2	5
3	f	0	15		128.572		GE2	1	45	6	sim	isim	IntPosterior	4	7
3	f	0	15		182.876		GE2	1	45	6	crus1	icrus1	IntPosterior	4	8
3	f	0	15		24.5291		GE2	1	45	6	crus2	icrus2	IntPosterior	4	9
3	f	0	15		87.6226		GE2	1	45	6	pm	ipm	IntPosterior	4	10
3	f	0	15		88.6779		GE2	1	45	6	cop	icop	IntPosterior	4	11
3	f	0	15		32.3131		GE2	1	45	12	2	m2	MedAnterior	5	13
3	f	0	15		80.0627		GE2	1	45	12	2	m2	MedAnterior	5	13
3	f	0	15		44.1378		GE2	1	45	12	3	m3	MedAnterior	5	14
3	f	0	15		74.6444		GE2	1	45	12	3	m3	MedAnterior	5	14
3	f	0	15		63.5748		GE2	1	45	12	4/5	m4/5	MedAnterior	5	15
3	f	0	15		66.5268		GE2	1	45	12	4/5	m4/5	MedAnterior	5	15
3	f	0	15		59.3841		GE2	1	45	12	4/5	m4/5	MedAnterior	5	15
3	f	0	15				GE2	1	45	12	6	m6	MedPosterior	6	16
3	f	0	15		75.4168		GE2	1	45	12	6	m6	MedPosterior	6	16
3	f	0	15		138.362		GE2	1	45	12	8	m8	MedPosterior	6	18
3	f	0	15		49.8733		GE2	1	45	12	8	m8	MedPosterior	6	18
3	f	0	15		61.7448		GE2	1	45	12	9	m9	MedPosterior	6	19
3	f	0	15		42.162		GE2	1	45	12	9	m9	MedPosterior	6	19
3	f	0	15		31.3015		GE2	1	45	12	10	m10	MedPosterior	6	20
3	f	0	15		23.6912		GE2	1	45	12	10	m10	MedPosterior	6	20
3	f	0	16	2003010_2178	8.49855		GE4	3	210	3	pfl	Lpfl	Vestibular	1	1
3	f	0	16	2	70.616		GE4	3	210	3	pfl	Lpfl	Vestibular	1	1
3	f	0	16	3			GE4	3	210	3	pfl	Lpfl	Vestibular	1	1
3	f	0	16	4			GE4	3	210	3	crus2	Lcrus2	Lateral	2	5
3	f	0	16	5	76.2624		GE4	3	210	3	crus2	Lcrus2	Lateral	2	5
3	f	0	16	6	27.0783		GE4	3	210	3	crus1	Lcrus1	Lateral	2	4
3	f	0	16	7	18.3386		GE4	3	210	3	sim	Lsim	Lateral	2	3
3	f	0	16	8			GE4	3	210	6	4/5	i4/5	IntAnterior	3	12
3	f	0	16	9	94.6054		GE4	3	210	6	crus1	icrus1	IntPosterior	4	8
3	f	0	16	10	71.8838		GE4	3	210	6	crus2	icrus2	IntPosterior	4	9
3	f	0	16	11			GE4	3	210	6	cop	icop	IntPosterior	4	11
3	f	0	16	12	39.3233		GE4	3	210	11	2	m2	MedAnterior	5	13
3	f	0	16	13	60.4754		GE4	3	210	11	2	m2	MedAnterior	5	13
3	f	0	16	14	61.5414		GE4	3	210	11	3	m3	MedAnterior	5	14
3	f	0	16	15	90.9499		GE4	3	210	11	3	m3	MedAnterior	5	14
3	f	0	16	16	69.4748		GE4	3	210	11	3	m3	MedAnterior	5	14
3	f	0	16	17	65.7102		GE4	3	210	11	4/5	m4/5	MedAnterior	5	15
3	f	0	16	18	89.3985		GE4	3	210	11	4/5	m4/5	MedAnterior	5	15
3	f	0	16	19	90.1954		GE4	3	210	11	4/5	m4/5	MedAnterior	5	15
3	f	0	16	20	106.965		GE4	3	210	11	6	m6	MedPosterior	6	16
3	f	0	16	21	77.6223		GE4	3	210	11	6	m6	MedPosterior	6	16
3	f	0	16	22	140.032		GE4	3	210	11	7	m7	MedPosterior	6	17
3	f	0	16	23	49.4868		GE4	3	210	11	8	m8	MedPosterior	6	18
3	f	0	16	24	115.443		GE4	3	210	11	8	m8	MedPosterior	6	18
3	f	0	16	25	46.9123		GE4	3	210	11	9	m9	MedPosterior	6	19
3	f	0	16	26	55.8386		GE4	3	210	11	9	m9	MedPosterior	6	19
3	f	0	16	27	26.1628		GE4	3	210	11	10	m10	MedPosterior	6	20
3	f	0	16	28	50.5209		GE4	3	210	11	10	m10	MedPosterior	6	20
3	f	0	17	2003012_2638	85.6664		GE2	1	45	3	fl	Lfl	Vestibular	1	2
3	f	0	17		14.114		GE2	1	45	3	pfl	Lpfl	Vestibular	1	1
3	f	0	17		64.1995		GE2	1	45	3	fl	Lfl	Vestibular	1	2
3	f	0	17		16.9306		GE2	1	45	3	pfl	Lpfl	Vestibular	1	1
3	f	0	17		100.275		GE2	1	45	3	sim	Lsim	Lateral	2	3
3	f	0	17		30.0457		GE2	1	45	3	sim	Lsim	Lateral	2	3
3	f	0	17		10.4547		GE2	1	45	3	crus1	Lcrus1	Lateral	2	4
3	f	0	17				GE2	1	45	3	crus1	Lcrus1	Lateral	2	4
3	f	0	17		46.2024		GE2	1	45	3	crus2	Lcrus2	Lateral	2	5
3	f	0	17		57.8984		GE2	1	45	3	crus2	Lcrus2	Lateral	2	5
3	f	0	17		101.009		GE2	1	45	3	pm	Lpm	Lateral	2	6
3	f	0	17		60.5508		GE2	1	45	6	cop	icop	IntPosterior	4	11
3	f	0	17		70.5905		GE2	1	45	6	pm	ipm	IntPosterior	4	10
3	f	0	17		82.8321		GE2	1	45	6	crus2	icrus2	IntPosterior	4	9
3	f	0	17		57.6238		GE2	1	45	11	2	m2	MedAnterior	5	13
3	f	0	17		70.6624		GE2	1	45	11	2	m2	MedAnterior	5	13
3	f	0	17		96.2757		GE2	1	45	11	3	m3	MedAnterior	5	14
3	f	0	17		74.6962		GE2	1	45	11	3	m3	MedAnterior	5	14
3	f	0	17		78.7321		GE2	1	45	11	4/5	m4/5	MedAnterior	5	15
3	f	0	17		64.6942		GE2	1	45	11	4/5	m4/5	MedAnterior	5	15
3	f	0	17		78.7617		GE2	1	45	11	6	m6	MedPosterior	6	16
3	f	0	17		18.9245		GE2	1	45	11	6	m6	MedPosterior	6	16
3	f	0	17		47.6912		GE2	1	45	11	7	m7	MedPosterior	6	17
3	f	0	17		69.9175		GE2	1	45	11	8	m8	MedPosterior	6	18
3	f	0	17		51.9043		GE2	1	45	11	8	m8	MedPosterior	6	18
3	f	0	17		125.921		GE2	1	45	11	9	m9	MedPosterior	6	19
3	f	0	17				GE2	1	45	11	9	m9	MedPosterior	6	19
3	f	0	17		22.4124		GE2	1	45	11	10	m10	MedPosterior	6	20
3	f	0	17		36.8326		GE2	1	45	11	10	m10	MedPosterior	6	20
3	f	0	18	200401_2629	26.2018		GE2	1	45	3	pfl	Lpfl	Vestibular	1	1
3	f	0	18	2			GE2	1	45	3	pm	Lpm	Lateral	2	6
3	f	0	18	3	74.6208		GE2	1	45	3	pm	Lpm	Lateral	2	6
3	f	0	18	4	19.0226		GE2	1	45	3	crus2	Lcrus2	Lateral	2	5
3	f	0	18	5	63.9441		GE2	1	45	3	crus1	Lcrus1	Lateral	2	4
3	f	0	18	6	27.532		GE2	1	45	3	sim	Lsim	Lateral	2	3
3	f	0	18	7	36.8348		GE2	1	45	7	4/5	i4/5	IntAnterior	3	12
3	f	0	18	8	97.5272		GE2	1	45	7	sim	isim	IntPosterior	4	7
3	f	0	18	9	95.6374		GE2	1	45	7	sim	isim	IntPosterior	4	7
3	f	0	18	10	45.0202		GE2	1	45	11	2	m2	MedAnterior	5	13
3	f	0	18	11			GE2	1	45	11	3	m3	MedAnterior	5	14
3	f	0	18	12	119.522		GE2	1	45	11	3	m3	MedAnterior	5	14
3	f	0	18	13	27.0782		GE2	1	45	11	4/5	m4/5	MedAnterior	5	15
3	f	0	18	14	64.5439		GE2	1	45	11	4/5	m4/5	MedAnterior	5	15
3	f	0	18	15	157.259		GE2	1	45	11	4/5	m4/5	MedAnterior	5	15
3	f	0	18	16	123.966		GE2	1	45	11	6	m6	MedPosterior	6	16
3	f	0	18	17	42.5326		GE2	1	45	11	6	m6	MedPosterior	6	16
3	f	0	18	18			GE2	1	45	11	7	m7	MedPosterior	6	17
3	f	0	18	19	34.4272		GE2	1	45	11	8	m8	MedPosterior	6	18
3	f	0	18	20	134.045		GE2	1	45	11	8	m8	MedPosterior	6	18
3	f	0	18	21	70.9651		GE2	1	45	11	9	m9	MedPosterior	6	19
3	f	0	18	22	21.748		GE2	1	45	11	9	m9	MedPosterior	6	19
3	f	0	18	23	28.9412		GE2	1	45	11	10	m10	MedPosterior	6	20
3	m	1	19	200429_2563	55.0021		GE3	2	120	3	crus1	Lcrus1	Lateral	2	4
3	m	1	19				GE3	2	120	3	crus2	Lcrus2	Lateral	2	5
3	m	1	19				GE3	2	120	3
3	m	1	19		29.9209		GE3	2	120	3	crus2	Lcrus2	Lateral	2	5
3	m	1	19		21.6511		GE3	2	120	3	fl	Lfl	Vestibular	1	2
3	m	1	19		75.1728		GE3	2	120	6	4/5	i4/5	IntAnterior	3	12
3	m	1	19		59.1126		GE3	2	120	6	sim	isim	IntPosterior	4	7
3	m	1	19		68.6645		GE3	2	120	6	crus1	icrus1	IntPosterior	4	8
3	m	1	19		16.9227		GE3	2	120	6	crus1	icrus1	IntPosterior	4	8
3	m	1	19				GE3	2	120	6	crus2	icrus2	IntPosterior	4	9
3	m	1	19		58.7862		GE3	2	120	6	crus2	icrus2	IntPosterior	4	9
3	m	1	19		55.7064		GE3	2	120	6	pm	ipm	IntPosterior	4	10
3	m	1	19		90.0067		GE3	2	120	6	cop	icop	IntPosterior	4	11
3	m	1	19				GE3	2	120	6	cop	icop	IntPosterior	4	11
3	m	1	19		57.7049		GE3	2	120	12	2	m2	MedAnterior	5	13
3	m	1	19		52.1845		GE3	2	120	12	2	m2	MedAnterior	5	13
3	m	1	19		86.6927		GE3	2	120	12	3	m3	MedAnterior	5	14
3	m	1	19		91.6806		GE3	2	120	12	3	m3	MedAnterior	5	14
3	m	1	19		75.0163		GE3	2	120	12	3	m3	MedAnterior	5	14
3	m	1	19		96.1625		GE3	2	120	12	4/5	m4/5	MedAnterior	5	15
3	m	1	19		43.109		GE3	2	120	12	4/5	m4/5	MedAnterior	5	15
3	m	1	19		105.578		GE3	2	120	12	6	m6	MedPosterior	6	16
3	m	1	19				GE3	2	120	12	7	m7	MedPosterior	6	17
3	m	1	19		56.7846		GE3	2	120	12	8	m8	MedPosterior	6	18
3	m	1	19		104.56		GE3	2	120	12	8	m8	MedPosterior	6	18
3	m	1	19		97.6965		GE3	2	120	12	9	m9	MedPosterior	6	19
3	m	1	19		36.4458		GE3	2	120	12	9	m9	MedPosterior	6	19
3	m	1	19		49.8293		GE3	2	120	12	9	m9	MedPosterior	6	19
3	m	1	19		38.3932		GE3	2	120	12	10	m10	MedPosterior	6	20
3	m	1	19		28.2969		GE3	2	120	12	10	m10	MedPosterior	6	20
3	f	0	20	200507a_2311	128.31		GE4	3	210	3	sim	Lsim	Lateral	2	3
3	f	0	20		161.724		GE4	3	210	3	crus2	Lcrus2	Lateral	2	5
3	f	0	20		24.1334		GE4	3	210	2	crus2	Lcrus2	Lateral	2	5
3	f	0	20				GE4	3	210	6	4/5	i4/5	IntAnterior	3	12
3	f	0	20		28.5534		GE4	3	210	6	sim	isim	IntPosterior	4	7
3	f	0	20		45.3106		GE4	3	210	6	crus1	icrus1	IntPosterior	4	8
3	f	0	20		95.2549		GE4	3	210	6	crus2	icrus2	IntPosterior	4	9
3	f	0	20		119.158		GE4	3	210	6	pm	ipm	IntPosterior	4	10
3	f	0	20				GE4	3	210	6	cop	icop	IntPosterior	4	11
3	f	0	20		124.298		GE4	3	210	6	cop	icop	IntPosterior	4	11
3	f	0	20		40.2613		GE4	3	210	11	2	m2	MedAnterior	5	13
3	f	0	20		65.1834		GE4	3	210	11	2	m2	MedAnterior	5	13
3	f	0	20		53.9137		GE4	3	210	11	3	m3	MedAnterior	5	14
3	f	0	20		171.743		GE4	3	210	11	4/5	m4/5	MedAnterior	5	15
3	f	0	20		98.6329		GE4	3	210	11	4/5	m4/5	MedAnterior	5	15
3	f	0	20		104.124		GE4	3	210	11	4/5	m4/5	MedAnterior	5	15
3	f	0	20		96.9291		GE4	3	210	11	6	m6	MedPosterior	6	16
3	f	0	20		104.732		GE4	3	210	11	6	m6	MedPosterior	6	16
3	f	0	20				GE4	3	210	11				#N/A	#N/A
3	f	0	20		81.0563		GE4	3	210	11	7	m7	MedPosterior	6	17
3	f	0	20		88.8141		GE4	3	210	11	8	m8	MedPosterior	6	18
3	f	0	20		113.017		GE4	3	210	11	8	m8	MedPosterior	6	18
3	f	0	20		67.9999		GE4	3	210	11	9	m9	MedPosterior	6	19
3	f	0	20		66.8465		GE4	3	210	11	9	m9	MedPosterior	6	19
3	f	0	20		86.3547		GE4	3	210	11	9	m9	MedPosterior	6	19
3	f	0	20		35.0381		GE4	3	210	11	10	m10	MedPosterior	6	20
3	f	0	20		31.5325		GE4	3	210	11	10	m10	MedPosterior	6	20
3	f	0	21	200507b_2314	4.73596		GE4	3	210	3	fl	Lfl	Vestibular	1	2
3	f	0	21	2	17.6353		GE4	3	210	3	pfl	Lpfl	Vestibular	1	1
3	f	0	21	3			GE4	3	210	3	pfl	Lpfl	Vestibular	1	1
3	f	0	21	4			GE4	3	210	3	crus2	Lcrus2	Lateral	2	5
3	f	0	21	5	197.087		GE4	3	210	3	crus2	Lcrus2	Lateral	2	5
3	f	0	21	6	77.248		GE4	3	210	3	crus1	Lcrus1	Lateral	2	4
3	f	0	21	7	29.4726		GE4	3	210	6	sim	isim	IntPosterior	4	7
3	f	0	21	8	54.3022		GE4	3	210	6	sim	isim	IntPosterior	4	7
3	f	0	21	9	50.0669		GE4	3	210	6	crus1	icrus1	IntPosterior	4	8
3	f	0	21	10	137.139		GE4	3	210	6	pm	ipm	IntPosterior	4	10
3	f	0	21	12	148.354		GE4	3	210	11	2	m2	MedAnterior	5	13
3	f	0	21	13	75.7496		GE4	3	210	11	2	m2	MedAnterior	5	13
3	f	0	21	14	62.01		GE4	3	210	11	3	m3	MedAnterior	5	14
3	f	0	21	15	196.507		GE4	3	210	11	3	m3	MedAnterior	5	14
3	f	0	21	16	138.06		GE4	3	210	11	4/5	m4/5	MedAnterior	5	15
3	f	0	21	17			GE4	3	210	11	4/5	m4/5	MedAnterior	5	15
3	f	0	21	18	56.9019		GE4	3	210	11	4/5	m4/5	MedAnterior	5	15
3	f	0	21	19	147.08		GE4	3	210	11	6	m6	MedPosterior	6	16
3	f	0	21	20	57.0998		GE4	3	210	11	6	m6	MedPosterior	6	16
3	f	0	21	21	124.722		GE4	3	210	11	7	m7	MedPosterior	6	17
3	f	0	21	22	99.0918		GE4	3	210	11	8	m8	MedPosterior	6	18
3	f	0	21	23	79.0118		GE4	3	210	11	8	m8	MedPosterior	6	18
3	f	0	21	24	124.047		GE4	3	210	11	9	m9	MedPosterior	6	19
3	f	0	21	25	20.0016		GE4	3	210	11	9	m9	MedPosterior	6	19
3	f	0	21	26	45.5579		GE4	3	210	11	9	m9	MedPosterior	6	19
3	f	0	21	27	40.5278		GE4	3	210	11	10	m10	MedPosterior	6	20
3	f	0	21	28	33.9154		GE4	3	210	11	10	m10	MedPosterior	6	20
3	m	1	22	200528_1658	19.1004		GE1	4	400	2	pfl	Lpfl	Vestibular	1	1				#NAME?
3	m	1	22		24.7458		GE1	4	400	2	fl	Lfl	Vestibular	1	2
3	m	1	22		56.8059		GE1	4	400	3	fl	Lfl	Vestibular	1	2
3	m	1	22		32.5139		GE1	4	400	3	fl	Lfl	Vestibular	1	2
3	m	1	22		9.72435		GE1	4	400	3	pfl	Lpfl	Vestibular	1	1
3	m	1	22				GE1	4	400	3	pm	Lpm	Lateral
3	m	1	22		109.973		GE1	4	400	3	pm	Lpm	Lateral	2	6
3	m	1	22				GE1	4	400	3	crus2	Lcrus2	Lateral
3	m	1	22		40.1187		GE1	4	400	3	crus2	Lcrus2	Lateral	2	5
3	m	1	22		121.834		GE1	4	400	3	crus1	Lcrus1	Lateral	2	4
3	m	1	22		69.507		GE1	4	400	3	crus1	Lcrus1	Lateral	2	4
3	m	1	22		11.9359		GE1	4	400	3	sim	Lsim	Lateral	2	3
3	m	1	22		13.8958		GE1	4	400	6	cop	icop	IntPosterior	4	11
3	m	1	22		37.789		GE1	4	400	6	pm	ipm	IntPosterior	4	10
3	m	1	22		42.5145		GE1	4	400	6	crus2	icrus2	IntPosterior	4	9
3	m	1	22		134.137		GE1	4	400	6	crus1	icrus1	IntPosterior	4	8
3	m	1	22		42.9067		GE1	4	400	6	4/5	i4/5	IntAnterior	3	12
3	m	1	22		77.9063		GE1	4	400	12	2	m2	MedAnterior	5	13
3	m	1	22		43.9645		GE1	4	400	12	2	m2	MedAnterior	5	13
3	m	1	22		33.7908		GE1	4	400	12	3	m3	MedAnterior	5	14
3	m	1	22		66.3441		GE1	4	400	12	3	m3	MedAnterior	5	14
3	m	1	22		91.6576		GE1	4	400	12	3	m3	MedAnterior	5	14
3	m	1	22		122.268		GE1	4	400	12	4/5	m4/5	MedAnterior	5	15
3	m	1	22		104.698		GE1	4	400	12	4/5	m4/5	MedAnterior	5	15
3	m	1	22		59.2099		GE1	4	400	12	4/5	m4/5	MedAnterior	5	15
3	m	1	22		85.3906		GE1	4	400	12	6	m6	MedPosterior	6	16
3	m	1	22		53.4746		GE1	4	400	12	6	m6	MedPosterior	6	16
3	m	1	22				GE1	4	400	12	7	m7	MedPosterior
3	m	1	22		68.0667		GE1	4	400	12	8	m8	MedPosterior	6	18
3	m	1	22		43.5069		GE1	4	400	12	8	m8	MedPosterior	6	18
3	m	1	22		52.6926		GE1	4	400	12	9	m9	MedPosterior	6	19
3	m	1	22		55.5724		GE1	4	400	12	9	m9	MedPosterior	6	19
3	m	1	22		68.6069		GE1	4	400	12	9	m9	MedPosterior	6	19
3	m	1	22		40.7481		GE1	4	400	12	10	m10	MedPosterior	6	20
3	m	1	22		28.1237		GE1	4	400	12	10	m10	MedPosterior	6	20
3	m	1	22		21.0888		GE1	4	400	12	10	m10	MedPosterior	6	20
3	m	1	23	200713_2697	72.327		GE3	2	120	3	sim	Lsim	Lateral	2	3
3	m	1	23		115.046		GE3	2	120	3	sim	Lsim	Lateral	2	3
3	m	1	23				GE3	2	120	3	crus1	Lcrus1	Lateral	2	4
3	m	1	23		26.101		GE3	2	120	3	crus2	Lcrus2	Lateral	2	5
3	m	1	23		41.6399		GE3	2	120	6	sim	isim	IntPosterior	4	7
3	m	1	23				GE3	2	120	6	sim	isim	IntPosterior	4	7
3	m	1	23		44.7511		GE3	2	120	6	crus2	icrus2	IntPosterior	4	9
3	m	1	23		107.67		GE3	2	120	6	pm	ipm	IntPosterior	4	10
3	m	1	23				GE3	2	120	6	pm	ipm	IntPosterior	4	10
3	m	1	23		67.4798		GE3	2	120	12	2	m2	MedAnterior	5	13
3	m	1	23		59.6742		GE3	2	120	12	2	m2	MedAnterior	5	13
3	m	1	23		49.4319		GE3	2	120	12	3	m3	MedAnterior	5	14
3	m	1	23		57.6788		GE3	2	120	12	3	m3	MedAnterior	5	14
3	m	1	23		55.8642		GE3	2	120	12	3	m3	MedAnterior	5	14
3	m	1	23		25.9631		GE3	2	120	12	4/5	m4/5	MedAnterior	5	15
3	m	1	23		95.2811		GE3	2	120	12	4/5	m4/5	MedAnterior	5	15
3	m	1	23		50.0652		GE3	2	120	12	4/5	m4/5	MedAnterior	5	15
3	m	1	23		103.404		GE3	2	120	12	6	m6	MedPosterior	6	16
3	m	1	23		47.873		GE3	2	120	12	6	m6	MedPosterior	6	16
3	m	1	23		88.5404		GE3	2	120	12	6	m6	MedPosterior	6	16
3	m	1	23		29.01		GE3	2	120	12	7	m7	MedPosterior	6	17
3	m	1	23		67.5405		GE3	2	120	12	8	m8	MedPosterior	6	18
3	m	1	23		48.389		GE3	2	120	12	8	m8	MedPosterior	6	18
3	m	1	23		64.1103		GE3	2	120	12	9	m9	MedPosterior	6	19
3	m	1	23		98.4027		GE3	2	120	12	9	m9	MedPosterior	6	19
3	m	1	23		30.4395		GE3	2	120	12	9	m9	MedPosterior	6	19
3	m	1	23		48.5021		GE3	2	120	12	10	m10	MedPosterior	6	20
3	m	1	23		17.6464		GE3	2	120	12	10	m10	MedPosterior	6	20
3	m	1	24	200714a_1915			GE1	4	400	2	fl	Lfl	Vestibular	1	2
3	m	1	24		91.7622		GE1	4	400	2	fl	Lfl	Vestibular	1	2
3	m	1	24		70.8331		GE1	4	400	2	pfl	Lpfl	Vestibular	1	1
3	m	1	24		110.874		GE1	4	400	2	pfl	Lpfl	Vestibular	1	1
3	m	1	24		63.4625		GE1	4	400	3	pfl	Lpfl	Vestibular	1	1
3	m	1	24		44.5396		GE1	4	400	3	fl	Lfl	Vestibular	1	2
3	m	1	24		129.153		GE1	4	400	3	crus2	Lcrus2	Lateral	2	5
3	m	1	24		54.5288		GE1	4	400	3	crus1	Lcrus1	Lateral	2	4
3	m	1	24		129.521		GE1	4	400	6	sim	isim	IntPosterior	4	7
3	m	1	24		51.7476		GE1	4	400	6	crus2	icrus2	IntPosterior	4	9
3	m	1	24		87.1601		GE1	4	400	6	pm	ipm	IntPosterior	4	10
3	m	1	24		72.2383		GE1	4	400	6	pm	ipm	IntPosterior	4	10
3	m	1	24		55.4175		GE1	4	400	7	sim	isim	IntPosterior	4	7
3	m	1	24		127.565		GE1	4	400	7	crus1	icrus1	IntPosterior	4	8
3	m	1	24		96.8171		GE1	4	400	7	crus2	icrus2	IntPosterior	4	9
3	m	1	24		25.5737		GE1	4	400	7	cop	icop	IntPosterior	4	11
3	m	1	24		52.6169		GE1	4	400	11	2	m2	MedAnterior	5	13
3	m	1	24		66.6314		GE1	4	400	11	2	m2	MedAnterior	5	13
3	m	1	24		65.7027		GE1	4	400	11	3	m3	MedAnterior	5	14
3	m	1	24		62.9142		GE1	4	400	11	3	m3	MedAnterior	5	14
3	m	1	24		67.8479		GE1	4	400	11	3	m3	MedAnterior	5	14
3	m	1	24		29.2489		GE1	4	400	11	4/5	m4/5	MedAnterior	5	15
3	m	1	24		68.03		GE1	4	400	11	4/5	m4/5	MedAnterior	5	15
3	m	1	24		85.3668		GE1	4	400	11	6	m6	MedPosterior	6	16
3	m	1	24		46.7007		GE1	4	400	11	7	m7	MedPosterior	6	17
3	m	1	24		115.149		GE1	4	400	11	7	m7	MedPosterior	6	17
3	m	1	24		60.4709		GE1	4	400	11	8	m8	MedPosterior	6	18
3	m	1	24		79.9927		GE1	4	400	11	8	m8	MedPosterior	6	18
3	m	1	24		131.449		GE1	4	400	11	9	m9	MedPosterior	6	19
3	m	1	24		23.4826		GE1	4	400	11	9	m9	MedPosterior	6	19
3	m	1	24		43.3505		GE1	4	400	11	9	m9	MedPosterior	6	19
3	m	1	24		26.3667		GE1	4	400	11	10	m10	MedPosterior	6	20
3	m	1	24		25.5065		GE1	4	400	11	10	m10	MedPosterior	6	20
3	f	0	25	200714b_1875	44.1059		GE1	4	400	3	pfl	Lpfl	Vestibular	1	1
3	f	0	25	2	77.9292		GE1	4	400	3	fl	Lfl	Vestibular	1	2
3	f	0	25	3	69.2981		GE1	4	400	3	crus1	Lcrus1	Lateral	2	4
3	f	0	25	4	66.9468		GE1	4	400	3	crus1	Lcrus1	Lateral	2	4
3	f	0	25	5	120.232		GE1	4	400	3	crus2	Lcrus2	Lateral	2	5
3	f	0	25	6	11.1212		GE1	4	400	3	pm	Lpm	Lateral	2	6
3	f	0	25	7	50.8875		GE1	4	400	3	cop	Lcop	#N/A	#N/A	#N/A
3	f	0	25	8	71.9155		GE1	4	400	6	4/5	i4/5	IntAnterior	3	12
3	f	0	25	9	45.0785		GE1	4	400	6	sim	isim	IntPosterior	4	7
3	f	0	25	10	52.6671		GE1	4	400	6	sim	isim	IntPosterior	4	7
3	f	0	25	11	75.1264		GE1	4	400	6	crus1	icrus1	IntPosterior	4	8
3	f	0	25	12	136.493		GE1	4	400	6	crus2	icrus2	IntPosterior	4	9
3	f	0	25	13	124.251		GE1	4	400	6	pm	ipm	IntPosterior	4	10
3	f	0	25	14	67.4165		GE1	4	400	6	cop	icop	IntPosterior	4	11
3	f	0	25	15	85.5776		GE1	4	400	12	2	m2	MedAnterior	5	13
3	f	0	25	16	27.4336		GE1	4	400	12	2	m2	MedAnterior	5	13
3	f	0	25	17	50.7152		GE1	4	400	12	3	m3	MedAnterior	5	14
3	f	0	25	18	55.9424		GE1	4	400	12	3	m3	MedAnterior	5	14
3	f	0	25	19	61.6167		GE1	4	400	12	3	m3	MedAnterior	5	14
3	f	0	25	20	110.506		GE1	4	400	12	4/5	m4/5	MedAnterior	5	15
3	f	0	25	21	48.7885		GE1	4	400	12	4/5	m4/5	MedAnterior	5	15
3	f	0	25	22	73.8626		GE1	4	400	12	4/5	m4/5	MedAnterior	5	15
3	f	0	25	23	53.737		GE1	4	400	12	6	m6	MedPosterior	6	16
3	f	0	25	24	68.4525		GE1	4	400	12	6	m6	MedPosterior	6	16
3	f	0	25	25	106.988		GE1	4	400	12	7	m7	MedPosterior	6	17
3	f	0	25	26	76.6058		GE1	4	400	12	8	m8	MedPosterior	6	18
3	f	0	25	27	45.3882		GE1	4	400	12	8	m8	MedPosterior	6	18
3	f	0	25	28	64.0936		GE1	4	400	12	9	m9	MedPosterior	6	19
3	f	0	25	29	34.1534		GE1	4	400	12	9	m9	MedPosterior	6	19
3	f	0	25	30	39.0733		GE1	4	400	12	10	m10	MedPosterior	6	20
3	f	0	25	31	36.3108		GE1	4	400	12	10	m10	MedPosterior	6	20
3	f	0	25	32	33.2582		GE1	4	400	12	10	m10	MedPosterior	6	20
3	m	1	26	200715_1917	22.7068		GE1	4	400	2	pfl	Lpfl	Vestibular	1	1
3	m	1	26	2	103.643		GE1	4	400	2	fl	Lfl	Vestibular	1	2
3	m	1	26	3	57.0225		GE1	4	400	2	pfl	Lpfl	Vestibular	1	1
3	m	1	26	4	15.0304		GE1	4	400	2	fl	Lfl	Vestibular	1	2
3	m	1	26	5	48.4485		GE1	4	400	2	sim	Lsim	Lateral	2	3
3	m	1	26	6	43.5043		GE1	4	400	2	crus1	Lcrus1	Lateral	2	4
3	m	1	26	7	64.8656		GE1	4	400	2	crus1	Lcrus1	Lateral	2	4
3	m	1	26	8	71.7283		GE1	4	400	2	crus2	Lcrus2	Lateral	2	5
3	m	1	26	9			GE1	4	400	2	crus2	Lcrus2	Lateral	2	5
3	m	1	26	10	16.7948		GE1	4	400	2	pm	Lpm	Lateral	2	6
3	m	1	26	11			GE1	4	400	6	cop	icop	IntPosterior	4	11
3	m	1	26	12	65.8576		GE1	4	400	6	cop	icop	IntPosterior	4	11
3	m	1	26	13	40.2689		GE1	4	400	6	pm	ipm	IntPosterior	4	10
3	m	1	26	14	46.8362		GE1	4	400	6	pm	ipm	IntPosterior	4	10
3	m	1	26	15	74.777		GE1	4	400	6	crus2	icrus2	IntPosterior	4	9
3	m	1	26	16	54.8516		GE1	4	400	6	sim	isim	IntPosterior	4	7
3	m	1	26	17	30.9727		GE1	4	400	6	4/5	i4/5	IntAnterior	3	12
3	m	1	26	18	68.1953		GE1	4	400	6	4/5	i4/5	IntAnterior	3	12
3	m	1	26	19	69.3106		GE1	4	400	12	2	m2	MedAnterior	5	13
3	m	1	26	20	51.0874		GE1	4	400	12	2	m2	MedAnterior	5	13
3	m	1	26	21	60.0738		GE1	4	400	12	3	m3	MedAnterior	5	14
3	m	1	26	22	62.8049		GE1	4	400	12	3	m3	MedAnterior	5	14
3	m	1	26	23	90.8823		GE1	4	400	12	3	m3	MedAnterior	5	14
3	m	1	26	24	105.979		GE1	4	400	12	4/5	m4/5	MedAnterior	5	15
3	m	1	26	25	74.1509		GE1	4	400	12	4/5	m4/5	MedAnterior	5	15
3	m	1	26	26	146.2		GE1	4	400	12	4/5	m4/5	MedAnterior	5	15
3	m	1	26	27	59.2334		GE1	4	400	12	6	m6	MedPosterior	6	16
3	m	1	26	28	79.9996		GE1	4	400	12	6	m6	MedPosterior	6	16
3	m	1	26	29	73.0809		GE1	4	400	12	6	m6	MedPosterior	6	16
3	m	1	26	30	90.1348		GE1	4	400	12	7	m7	MedPosterior	6	17
3	m	1	26	31	32.5808		GE1	4	400	12	7	m7	MedPosterior	6	17
3	m	1	26	32	64.7528		GE1	4	400	12	8	m8	MedPosterior	6	18
3	m	1	26	33	81.3535		GE1	4	400	12	8	m8	MedPosterior	6	18
3	m	1	26	34	92.6159		GE1	4	400	12	9	m9	MedPosterior	6	19
3	m	1	26	35	59.465		GE1	4	400	12	9	m9	MedPosterior	6	19
3	m	1	26	36	60.8855		GE1	4	400	12	9	m9	MedPosterior	6	19
3	m	1	26	37	6.67786		GE1	4	400	12	10	m10	MedPosterior	6	20
3	m	1	26	38	29.6723		GE1	4	400	12	10	m10	MedPosterior	6	20
3	m	1	26	39	33.3155		GE1	4	400	12	10	m10	MedPosterior	6	20

## Sheet: AtmWt Wt; Aptx- -
AtmWt/Wt; Aptx-/-			Total # of animals	30
Genotype	sex	sex code (1=m)	sex code (1=m)	Exp. Date_Animal ID	Average frequency	Average frequency	Group	Age	Age days	slice	folia	Position name	Region name	Gross Region ID	Position ID								1-5 vs 6-10
4	m	1	1	190417_1386	75.0155		GE2	1	45	4	pfl	Lpfl	Vestibular	1	1		All time points												m					f
4	m	1	1	2	110.224		GE2	1	45	4	pfl	Lpfl	Vestibular	1	1		By Position ID	average	stdev	n	sem		By major regions	average	stdev	n	sem		average	stdev	n	sem		average	stdev	n	sem
4	m	1	1	3	26.1591		GE2	1	45	4	pm	Lpm	Lateral	2	6		Lpfl	50.0661	33.8947	10	10.7184	1	Vestibular	44.0144	31.7577	15	8.19981	1	46.3599	35.505	7	13.4196		52.9657	28.508	8	10.0791
4	m	1	1	4	51.3844		GE2	1	45	4	crus2	Lcrus2	Lateral	2	5		Lfl	49.5167	33.5499	5	15.004	2	Lateral	59.5562	46.1725	105	4.50598	2	75.084	49.9402	52	6.92546		67.9191	42.3301	53	5.81449
4	m	1	1	5	139.302		GE2	1	45	4	crus2	Lcrus2	Lateral	2	5		Lsim	73.2831	49.0237	21	10.6979	3	IntAnterior	46.2291	37.4834	28	7.08369	3	70.1336	33.5647	11	10.1202		51.8445	38.3593	17	9.3035
4	m	1	1	6	94.5099		GE2	1	45	4	crus2	Lcrus2	Lateral	2	5		Lcrus1	57.6641	49.9007	29	9.26633	4	IntPosterior	63.8777	33.3736	110	3.18205	4	66.6867	28.5752	57	3.78487		71.7039	37.9742	53	5.21616
4	m	1	1	7	29.4896		GE2	1	45	4	crus2	Lcrus2	Lateral	2	5		Lcrus2	80.8279	52.2858	43	7.97351	5	MedAnterior	76.4154	30.7029	248	1.94964	5	76.414	27.9995	127	2.48455		79.5746	33.3466	121	3.03151
4	m	1	1	8	76.3546		GE2	1	45	4	crus1	Lcrus1	Lateral	2	4		Lpm	68.1063	38.7044	12	11.173	6	MedPosterior	61.9951	32.3273	296	1.87898	6	60.9275	30.1236	147	2.48455		66.3769	34.2282	149	2.80409
4	m	1	1	9			GE2	1	45	4	sim	Lsim		#N/A	3		isim	68.9536	37.1494	21	8.10667	7
4	m	1	1	10	22.2706		GE2	1	45	7	cop	icop	IntPosterior	4	11		icrus1	65.8654	31.247	26	6.12805	8
4	m	1	1	11	30.8311		GE2	1	45	7	cop	icop	IntPosterior	4	11		icrus2	78.4958	40.358	24	8.23804	9
4	m	1	1	12	51.1129		GE2	1	45	7	pm	ipm	IntPosterior	4	10		ipm	75.8873	39.7206	21	8.66775	10
4	m	1	1	13	78.0629		GE2	1	45	7	pm	ipm	IntPosterior	4	10		icop	53.5216	33.4155	18	7.8761	11
4	m	1	1	14	59.7688		GE2	1	45	7	pm	ipm	IntPosterior	4	10		i4/5	57.324	40.7294	25	8.14588	12
4	m	1	1	15	51.3709		GE2	1	45	7	crus2	icrus2	IntPosterior	4	9		m2	71.878	24.9874	69	3.00812	13
4	m	1	1	16	61.2187		GE2	1	45	7	crus1	icrus1	IntPosterior	4	8		m3	80.5031	34.8917	79	3.92562	14
4	m	1	1	17	62.9626		GE2	1	45	7	sim	isim	IntPosterior	4	7		m4/5	80.1377	34.4052	100	3.44052	15
4	m	1	1	18	56.1629		GE2	1	45	7	sim	isim	IntPosterior	4	7		m6	79.2661	33.6826	66	4.14604	16
4	m	1	1	19	24.788		GE2	1	45	7	sim	isim	IntPosterior	4	7		m7	76.8976	29.5936	31	5.31517	17
4	m	1	1	20	18.584		GE2	1	45	10	10	m10	MedPosterior	6	20		m8	75.493	32.9711	54	4.4868	18
4	m	1	1	21	13.9835		GE2	1	45	10	10	m10	MedPosterior	6	20		m9	60.8814	29.5554	80	3.3044	19
4	m	1	1	22	44.1583		GE2	1	45	10	10	m10	MedPosterior	6	20		m10	35.1382	19.2669	65	2.38976	20
4	m	1	1	23	40.5989		GE2	1	45	10	9	m9	MedPosterior	6	19
4	m	1	1	24	47.8119		GE2	1	45	10	9	m9	MedPosterior	6	19
4	m	1	1	25	64.7777		GE2	1	45	10	9	m9	MedPosterior	6	19
4	m	1	1	26	60.6678		GE2	1	45	10	9	m9	MedPosterior	6	19
4	m	1	1	27	73.3359		GE2	1	45	10	9	m9	MedPosterior	6	19
4	m	1	1	28	101.666		GE2	1	45	10	8	m8	MedPosterior	6	18
4	m	1	1	29	165.994		GE2	1	45	10	8	m8	MedPosterior	6	18
4	m	1	1	30	66.9927		GE2	1	45	10	8	m8	MedPosterior	6	18
4	m	1	1	31			GE2	1	45	10	7	m7		#N/A	17
4	m	1	1	32	43.1396		GE2	1	45	10	6	m6	MedPosterior	6	16
4	m	1	1	33	56.5925		GE2	1	45	10	6	m6	MedPosterior	6	16
4	m	1	1	34	66.5679		GE2	1	45	10	6	m6	MedPosterior	6	16
4	m	1	1	35	56.6852		GE2	1	45	10	4/5	m4/5	MedAnterior	5	15
4	m	1	1	36	73.9237		GE2	1	45	10	4/5	m4/5	MedAnterior	5	15
4	m	1	1	37	56.686		GE2	1	45	10	4/5	m4/5	MedAnterior	5	15
4	m	1	1	38	92.1982		GE2	1	45	10	4/5	m4/5	MedAnterior	5	15
4	m	1	1	39	75.998		GE2	1	45	10	3	m3	MedAnterior	5	14
4	m	1	1	40	75.1173		GE2	1	45	10	3	m3	MedAnterior	5	14
4	m	1	1	41	124.283		GE2	1	45	10	3	m3	MedAnterior	5	14		GE2	45 days	N	8									m					f
4	m	1	1	42	42.7833		GE2	1	45	10	3	m3	MedAnterior	5	14		By Position ID	average	stdev	n	sem		By major regions	average	stdev	n	sem		average	stdev	n	sem		average	stdev	n	sem
4	m	1	1	43	44.8546		GE2	1	45	10	3	m3	MedAnterior	5	14		Lpfl	87.7282	19.5367	3	11.2795		Vestibular	87.7282	19.5367	3	11.2795		92.6197	24.896	2	17.6042		77.9454	#DIV/0!	1	#DIV/0!
4	m	1	1	44	68.1534		GE2	1	45	10	2	m2	MedAnterior	5	13		Lfl	#DIV/0!	#DIV/0!	0	#DIV/0!		Lateral	69.7114	46.3612	42	7.15369		69.6057	#N/A	17	#N/A		69.7833	#N/A	25	#N/A
4	m	1	1	45	58.7115		GE2	1	45	10	2	m2	MedAnterior	5	13		Lsim	76.5999	53.1191	8	18.7804		IntAnterior	70.8515	35.7976	17	8.68218		76.362	#N/A	6	#N/A		67.8458	#N/A	11	#N/A
4	m	1	1	46	72.7204		GE2	1	45	10	2	m2	MedAnterior	5	13		Lcrus1	55.7549	50.7588	12	14.6528		IntPosterior	59.3105	27.9308	43	4.25941		58.5913	#N/A	23	#N/A		60.1376	#N/A	20	#N/A
4	m	1	1	47	56.9625		GE2	1	45	10	2	m2	MedAnterior	5	13		Lcrus2	77.3093	51.6218	18	12.1674		MedAnterior	74.5094	27.7485	72	3.27019		73.9217	#N/A	43	#N/A		75.3809	#N/A	29	#N/A
4	f	0	2	190418_1442	64.4938		GE2	1	45	3	sim	Lsim	Lateral	2	3		Lpm	63.6133	38.5664	4	19.2832		MedPosterior	61.0141	28.8295	98	2.91222		62.2088	#N/A	54	#N/A		59.5479	#N/A	44	#N/A
4	f	0	2	2	75.3448		GE2	1	45	3	sim	Lsim	Lateral	2	3		isim	57.9493	31.1919	10	9.86373
4	f	0	2	3	120.79		GE2	1	45	3	sim	Lsim	Lateral	2	3		icrus1	64.9614	20.8531	9	6.95104
4	f	0	2	4	12.9904		GE2	1	45	3	sim	Lsim	Lateral	2	3		icrus2	55.0619	26.8924	6	10.9788
4	f	0	2	5	196.372		GE2	1	45	3	crus1	Lcrus1	Lateral	2	4		ipm	67.062	28.305	7	10.6983
4	f	0	2	6	22.5236		GE2	1	45	3	crus1	Lcrus1	Lateral	2	4		icop	53.309	32.9791	11	9.94358
4	f	0	2	7			GE2	1	45	3	crus1	Lcrus1		#N/A	4		i4/5	70.3394	41.118	14	10.9892
4	f	0	2	8	11.1587		GE2	1	45	3	crus1	Lcrus1	Lateral	2	4		m2	70.5851	23.3363	17	5.65989
4	f	0	2	9			GE2	1	45	3	crus1	Lcrus1		#N/A	4		m3	83.4887	38.5447	22	8.21775
4	f	0	2	10	116.485		GE2	1	45	3	crus2	Lcrus2	Lateral	2	5		m4/5	70.5448	28.5843	33	4.97588
4	f	0	2	11	70.479		GE2	1	45	3	crus2	Lcrus2	Lateral	2	5		m6	65.1891	21.1981	21	4.6258
4	f	0	2	12	127.514		GE2	1	45	3	crus2	Lcrus2	Lateral	2	5		m7	84.0928	42.0575	9	14.0192
4	f	0	2	13			GE2	1	45	3	crus2	Lcrus2		#N/A	5		m8	74.3664	31.7838	20	7.10707
4	f	0	2	14	65.4747		GE2	1	45	3	pm	Lpm	Lateral	2	6		m9	57.6427	24.9476	26	4.89263
4	f	0	2	15	48.8695		GE2	1	45	7	3	i3	intanterior	3	#N/A		m10	39.4337	22.5046	22	4.798
4	f	0	2	16	68.9989		GE2	1	45	7	3	i3	intanterior	3	#N/A
4	f	0	2	17	118.705		GE2	1	45	7	4/5	i4/5	IntAnterior	3	12
4	f	0	2	18	74.8616		GE2	1	45	7	4/5	i4/5	IntAnterior	3	12
4	f	0	2	19	22.7559		GE2	1	45	7	4/5	i4/5	IntAnterior	3	12
4	f	0	2	20	117.086		GE2	1	45	7	4/5	i4/5	IntAnterior	3	12
4	f	0	2	21	57.1164		GE2	1	45	7	sim	isim	IntPosterior	4	7
4	f	0	2	22	37.7717		GE2	1	45	7	sim	isim	IntPosterior	4	7
4	f	0	2	23	84.0217		GE2	1	45	7	crus2	icrus2	IntPosterior	4	9
4	f	0	2	24	87.0516		GE2	1	45	7	pm	ipm	IntPosterior	4	10
4	f	0	2	25	45.493		GE2	1	45	7	pm	ipm	IntPosterior	4	10
4	f	0	2	26	47.3415		GE2	1	45	7	cop	icop	IntPosterior	4	11
4	f	0	2	27	28.8728		GE2	1	45	7	cop	icop	IntPosterior	4	11
4	f	0	2	28	17.1352		GE2	1	45	10	10	m10	MedPosterior	6	20
4	f	0	2	29	19.6556		GE2	1	45	10	10	m10	MedPosterior	6	20
4	f	0	2	30	49.5737		GE2	1	45	10	10	m10	MedPosterior	6	20
4	f	0	2	31	49.0627		GE2	1	45	10	10	m10	MedPosterior	6	20
4	f	0	2	32	47.1001		GE2	1	45	10	9	m9	MedPosterior	6	19
4	f	0	2	33	58.2392		GE2	1	45	10	9	m9	MedPosterior	6	19
4	f	0	2	34	45.5566		GE2	1	45	10	9	m9	MedPosterior	6	19
4	f	0	2	35	58.7416		GE2	1	45	10	8	m8	MedPosterior	6	18		GE3	120 days	N	8									m	N	4			f	N	4
4	f	0	2	36	69.4275		GE2	1	45	10	8	m8	MedPosterior	6	18		By Position ID	average	stdev	n	sem		By major regions	average	stdev	n	sem		average	stdev	n	sem		average	stdev	n	sem
4	f	0	2	37	77.8462		GE2	1	45	10	8	m8	MedPosterior	6	18		Lpfl	22.2253	#DIV/0!	1	#DIV/0!		Vestibular	22.2253	#DIV/0!	1	#DIV/0!		22.2253	#DIV/0!	1	#DIV/0!		#DIV/0!	#DIV/0!	0	#DIV/0!
4	f	0	2	38	48.2155		GE2	1	45	10	7	m7	MedPosterior	6	17		Lfl	#DIV/0!	#DIV/0!	0	#DIV/0!		Lateral	70.5504	39.6843	28	7.49963		77.2331	47.3148	15	12.2166		62.8396	28.4844	13	7.90015
4	f	0	2	39	43.5556		GE2	1	45	10	6	m6	MedPosterior	6	16		Lsim	44.861	23.2187	5	10.3837		IntAnterior	36.2301	23.7024	3	13.6846		62.2711	#DIV/0!	1	#DIV/0!		23.2096	10.3152	2	7.29398
4	f	0	2	40	105.937		GE2	1	45	10	6	m6	MedPosterior	6	16		Lcrus1	52.9441	41.341	8	14.6162		IntPosterior	76.997	29.8158	31	5.35508		76.5608	28.9019	16	7.22547		77.4624	31.7731	15	8.20378
4	f	0	2	41	71.4171		GE2	1	45	10	6	m6	MedPosterior	6	16		Lcrus2	92.1787	55.1685	10	17.4458		MedAnterior	71.4615	27.6785	64	3.45981		73.1626	26.3408	36	4.39014		69.2744	29.6533	28	5.60395
4	f	0	2	42	78.8368		GE2	1	45	10	6	m6	MedPosterior	6	16		Lpm	81.1531	40.9645	5	18.3199		MedPosterior	63.9982	31.1796	73	3.64929		66.1253	29.0193	39	4.64681		61.5584	33.7624	34	5.7902
4	f	0	2	43	122.45		GE2	1	45	10	4/5	m4/5	MedAnterior	5	15		isim	49.8966	15.2744	2	10.8006
4	f	0	2	44	50.229		GE2	1	45	10	4/5	m4/5	MedAnterior	5	15		icrus1	73.2952	23.5128	9	7.83761
4	f	0	2	45	52.0861		GE2	1	45	10	4/5	m4/5	MedAnterior	5	15		icrus2	89.185	41.8901	9	13.9634
4	f	0	2	46	105.803		GE2	1	45	10	3	m3	MedAnterior	5	14		ipm	78.3983	35.4222	7	13.3883
4	f	0	2	47	103.84		GE2	1	45	10	3	m3	MedAnterior	5	14		icop	69.0013	35.9874	4	17.9937
4	f	0	2	48			GE2	1	45	10	3	m3		#N/A	14		i4/5	36.2301	26.5083	3	15.3046
4	f	0	2	49	73.4876		GE2	1	45	10	3	m3	MedAnterior	5	14		m2	67.2491	26.3494	17	6.39066
4	f	0	2	50	30.5264		GE2	1	45	10	2	m2	MedAnterior	5	13		m3	69.6438	30.4826	20	6.81612
4	f	0	2	51	112.576		GE2	1	45	10	2	m2	MedAnterior	5	13		m4/5	75.4603	26.8195	27	5.16141
4	f	0	2	52	81.4083		GE2	1	45	10	2	m2	MedAnterior	5	13		m6	84.4017	34.398	16	8.59951
4	m	1	3	190422_1445			GE2	1	45	3	pm	Lpm		#N/A	6		m7	78.6739	23.7298	10	7.50402
4	m	1	3	2			GE2	1	45	3	crus2	Lcrus2		#N/A	5		m8	66.3501	20.9791	11	6.32542
4	m	1	3	3			GE2	1	45	3	crus2	Lcrus2		#N/A	5		m9	60.7166	27.521	21	6.00558
4	m	1	3	4	94.9223		GE2	1	45	3	crus1	Lcrus1	Lateral	2	4		m10	35.3203	22.154	15	5.72013
4	m	1	3	5	31.1142		GE2	1	45	3	crus1	Lcrus1	Lateral	2	4
4	m	1	3	6	101.856		GE2	1	45	7	3	i3	intanterior	3	#N/A
4	m	1	3	7	86.2055		GE2	1	45	7	4/5	i4/5	IntAnterior	3	12
4	m	1	3	8	2.85681		GE2	1	45	7	4/5	i4/5	IntAnterior	3	12
4	m	1	3	9	137.798		GE2	1	45	7	sim	isim	IntPosterior	4	7
4	m	1	3	10	84.2538		GE2	1	45	7	crus1	icrus1	IntPosterior	4	8
4	m	1	3	11	16.7368		GE2	1	45	11	10	m10	MedPosterior	6	20
4	m	1	3	12	44.1708		GE2	1	45	11	10	m10	MedPosterior	6	20
4	m	1	3	13	45.2426		GE2	1	45	11	10	m10	MedPosterior	6	20
4	m	1	3	14	79.4685		GE2	1	45	11	10	m10	MedPosterior	6	20
4	m	1	3	15	101.169		GE2	1	45	11	10	m10	MedPosterior	6	20
4	m	1	3	16	81.7556		GE2	1	45	11	9	m9	MedPosterior	6	19
4	m	1	3	17	104.586		GE2	1	45	11	9	m9	MedPosterior	6	19
4	m	1	3	18	32.0858		GE2	1	45	11	9	m9	MedPosterior	6	19
4	m	1	3	19	49.567		GE2	1	45	11	9	m9	MedPosterior	6	19
4	m	1	3	20	41.0541		GE2	1	45	11	8	m8	MedPosterior	6	18
4	m	1	3	21	77.6067		GE2	1	45	11	8	m8	MedPosterior	6	18
4	m	1	3	22	109.033		GE2	1	45	11	8	m8	MedPosterior	6	18
4	m	1	3	23	40.4135		GE2	1	45	11	8	m8	MedPosterior	6	18		GE4	210 days	N	7									m	N	3			f	N	4
4	m	1	3	24	53.2363		GE2	1	45	11	7	m7	MedPosterior	6	17		By Position ID	average	stdev	n	sem		By major regions	average	stdev	n	sem		average	stdev	n	sem		average	stdev	n	sem
4	m	1	3	25	75.6565		GE2	1	45	11	7	m7	MedPosterior	6	17		Lpfl	#DIV/0!	#DIV/0!	0	#DIV/0!		Vestibular	66.1968	#DIV/0!	1	#DIV/0!		#DIV/0!	#DIV/0!	0	#DIV/0!		66.1968	#DIV/0!	1	#DIV/0!
4	m	1	3	26	56.2904		GE2	1	45	11	6	m6	MedPosterior	6	16		Lfl	66.1968	#DIV/0!	1	#DIV/0!		Lateral	71.5103	60.7442	20	13.5828		68.9013	59.8608	13	16.6024		76.3556	66.9015	7	25.2864
4	m	1	3	27	58.904		GE2	1	45	11	6	m6	MedPosterior	6	16		Lsim	64.1562	42.3487	5	18.9389		IntAnterior	31.7068	28.4141	5	12.7072		41.7199	23.5463	2	16.6497		25.0314	34.2112	3	19.7519
4	m	1	3	28	74.1741		GE2	1	45	11	6	m6	MedPosterior	6	16		Lcrus1	82.8815	88.5962	4	44.2981		IntPosterior	88.5942	37.548	15	9.69486		72.497	26.9215	8	9.51819		106.991	41.2767	7	15.6011
4	m	1	3	29	28.4772		GE2	1	45	11	6	m6	MedPosterior	6	16		Lcrus2	79.3726	66.0261	9	22.0087		MedAnterior	86.3072	36.5317	61	4.6774		80.6662	35.1408	27	6.76285		90.7868	37.5078	34	6.43253
4	m	1	3	30	57.1804		GE2	1	45	11	4/5	m4/5	MedAnterior	5	15		Lpm	31.7728	2.85675	2	2.02003		MedPosterior	69.7962	33.282	70	3.97797		63.964	33.4707	29	6.21536		73.9215	32.9312	41	5.143
4	m	1	3	31	99.0038		GE2	1	45	11	4/5	m4/5	MedAnterior	5	15		isim	76.4782	42.5999	5	19.0513
4	m	1	3	32	98.8043		GE2	1	45	11	4/5	m4/5	MedAnterior	5	15		icrus1	88.3193	48.4339	3	27.9633
4	m	1	3	33	89.0042		GE2	1	45	11	4/5	m4/5	MedAnterior	5	15		icrus2	88.3801	54.6343	4	27.3171
4	m	1	3	34	107.51		GE2	1	45	11	4/5	m4/5	MedAnterior	5	15		ipm	132.471	81.3314	2	57.51
4	m	1	3	35	73.5885		GE2	1	45	11	4/5	m4/5	MedAnterior	5	15		icop	63.1011	#DIV/0!	1	#DIV/0!
4	m	1	3	36	38.8641		GE2	1	45	11	4/5	m4/5	MedAnterior	5	15		i4/5	31.7068	28.5209	5	12.7549
4	m	1	3	37	83.3961		GE2	1	45	11	3	m3	MedAnterior	5	14		m2	79.2043	27.3558	21	5.96952
4	m	1	3	38	83.8064		GE2	1	45	11	3	m3	MedAnterior	5	14		m3	88.5373	40.6795	20	9.0962
4	m	1	3	39	102.352		GE2	1	45	11	3	m3	MedAnterior	5	14		m4/5	91.5353	47.406	20	10.6003
4	m	1	3	40	112.916		GE2	1	45	11	3	m3	MedAnterior	5	14		m6	99.2787	29.3238	17	7.11206
4	m	1	3	41	46.1191		GE2	1	45	11	3	m3	MedAnterior	5	14		m7	72.6696	24.7635	9	8.25451
4	m	1	3	42	98.3937		GE2	1	45	11	3	m3	MedAnterior	5	14		m8	84.2165	36.2158	14	9.67908
4	m	1	3	43	94.6655		GE2	1	45	11	2	m2	MedAnterior	5	13		m9	58.0255	22.8969	15	5.91197
4	m	1	3	44	116.486		GE2	1	45	11	2	m2	MedAnterior	5	13		m10	32.9706	15.5732	15	4.02098
4	f	0	4	190604_1644	77.9454		GE2	1	45	3	pfl	Lpfl	Vestibular	1	1
4	f	0	4	2	64.5321		GE2	1	45	3	crus2	Lcrus2	Lateral	2	5
4	f	0	4	3	96.0679		GE2	1	45	3	crus2	Lcrus2	Lateral	2	5
4	f	0	4	4	51.787		GE2	1	45	3	crus1	Lcrus1	Lateral	2	4
4	f	0	4	5	29.1071		GE2	1	45	3	sim	Lsim	Lateral	2	3
4	f	0	4	6	32.4254		GE2	1	45	7	cop	icop	IntPosterior	4	11
4	f	0	4	7	45.8322		GE2	1	45	7	cop	icop	IntPosterior	4	11
4	f	0	4	8	83.6418		GE2	1	45	7	cop	icop	IntPosterior	4	11
4	f	0	4	9	137.444		GE2	1	45	7	cop	icop	IntPosterior	4	11
4	f	0	4	10	50.9853		GE2	1	45	7	cop	icop	IntPosterior	4	11
4	f	0	4	11	96.7823		GE2	1	45	7	crus1	icrus1	IntPosterior	4	8
4	f	0	4	12	43.8344		GE2	1	45	7	crus1	icrus1	IntPosterior	4	8
4	f	0	4	13	52.9793		GE2	1	45	7	sim	isim	IntPosterior	4	7
4	f	0	4	14	24.0634		GE2	1	45	7	4/5	i4/5	IntAnterior	3	12
4	f	0	4	15	89.6517		GE2	1	45	7	4/5	i4/5	IntAnterior	3	12
4	f	0	4	16	28.2286		GE2	1	45	10	10	m10	MedPosterior	6	20
4	f	0	4	17	56.6294		GE2	1	45	10	10	m10	MedPosterior	6	20
4	f	0	4	18	60.7672		GE2	1	45	10	9	m9	MedPosterior	6	19
4	f	0	4	19	39.773		GE2	1	45	10	9	m9	MedPosterior	6	19
4	f	0	4	20	51.8395		GE2	1	45	10	9	m9	MedPosterior	6	19		GE1	400 days	N	7									m	N	3			f	N	4
4	f	0	4	21	38.062		GE2	1	45	10	8	m8	MedPosterior	6	18		By Position ID	average	stdev	n	sem		By major regions	average	stdev	n	sem		average	stdev	n	sem		average	stdev	n	sem
4	f	0	4	22	56.0571		GE2	1	45	10	8	m8	MedPosterior	6	18		Lpfl	35.8752	23.4906	6	9.59		Vestibular	39.6638	26.6273	10	8.42029		29.2636	15.6315	4	7.81576		46.5972	30.4846	6	12.4453
4	f	0	4	23	152.597		GE2	1	45	10	7	m7	MedPosterior	6	17		Lfl	45.3467	34.9357	4	17.4678		Lateral	78.0391	37.9521	15	9.79919		95.2652	29.0851	7	10.9931		62.9662	39.9905	8	14.1388
4	f	0	4	24	82.3069		GE2	1	45	10	6	m6	MedPosterior	6	16		Lsim	127.02	66.7604	3	38.5441		IntAnterior	60.3754	45.386	3	26.2036		83.7931	12.4676	2	8.8159		13.54	9.57421	1	9.57421
4	f	0	4	25	84.2019		GE2	1	45	10	6	m6	MedPosterior	6	16		Lcrus1	49.624	22.3915	5	10.0138		IntPosterior	63.5846	38.6248	21	8.42862		64.8594	27.5618	10	8.7158		62.4257	47.9266	11	14.4504
4	f	0	4	26	81.9586		GE2	1	45	10	4/5	m4/5	MedAnterior	5	15		Lcrus2	74.6491	32.6999	6	13.3497		MedAnterior	80.9832	28.8292	51	4.03689		81.6237	24.9765	21	5.45031		80.5349	31.6582	30	5.77997
4	f	0	4	27	53.4476		GE2	1	45	10	4/5	m4/5	MedAnterior	5	15		Lpm	93.5115	66.1226	1	66.1226		MedPosterior	60.1729	37.6115	55	5.07153		46.5291	22.2193	25	4.44387		71.5426	43.7294	30	7.98386
4	f	0	4	28	145.396		GE2	1	45	10	4/5	m4/5	MedAnterior	5	15		isim	96.5871	45.0116	4	22.5058
4	f	0	4	29	63.7704		GE2	1	45	10	4/5	m4/5	MedAnterior	5	15		icrus1	40.6465	28.0201	5	12.531
4	f	0	4	30	74.9987		GE2	1	45	10	4/5	m4/5	MedAnterior	5	15		icrus2	79.4685	35.7473	5	15.9867
4	f	0	4	31	73.6034		GE2	1	45	10	3	m3	MedAnterior	5	14		ipm	62.0938	36.5977	5	16.367
4	f	0	4	32	125.629		GE2	1	45	10	3	m3	MedAnterior	5	14		icop	18.9421	17.441	2	12.3327
4	f	0	4	33	88.0324		GE2	1	45	10	2	m2	MedAnterior	5	13		i4/5	60.3754	42.2221	3	24.377
4	f	0	4	34	86.1118		GE2	1	45	10	2	m2	MedAnterior	5	13		m2	68.0795	21.3874	14	5.71603
4	f	0	5	190611a_1726	99.7458		GE2	1	45	3	pm	Lpm	Lateral	2	6		m3	79.9632	24.596	17	5.96541
4	f	0	5	2	29.3133		GE2	1	45	3	crus2	Lcrus2	Lateral	2	5		m4/5	90.8828	33.7338	20	7.5431
4	f	0	5	3	115.418		GE2	1	45	3	crus2	Lcrus2	Lateral	2	5		m6	68.7022	40.6417	12	11.7323
4	f	0	5	4	61.6739		GE2	1	45	3	crus2	Lcrus2	Lateral	2	5		m7	62.075	16.9467	3	9.7842
4	f	0	5	5	37.9885		GE2	1	45	3	crus1	Lcrus1	Lateral	2	4		m8	75.6012	42.94	9	14.3133
4	f	0	5	6			GE2	1	45	3	sim	Lsim		#N/A	3		m9	68.1316	41.2968	18	9.73376
4	f	0	5	7	93.6742		GE2	1	45	6	4/5	i4/5	IntAnterior	3	12		m10	30.1597	12.5509	13	3.48099
4	f	0	5	8	64.3176		GE2	1	45	6	crus1	icrus1	IntPosterior	4	8
4	f	0	5	9	51.217		GE2	1	45	10	2	m2	MedAnterior	5	13
4	f	0	5	10	51.8553		GE2	1	45	10	2	m2	MedAnterior	5	13
4	f	0	5	11	62.0504		GE2	1	45	10	3	m3	MedAnterior	5	14
4	f	0	5	12			GE2	1	45	10	3	m3		#N/A	14
4	f	0	5	13	66.4648		GE2	1	45	10	4/5	m4/5	MedAnterior	5	15
4	f	0	5	14	41.8529		GE2	1	45	10	4/5	m4/5	MedAnterior	5	15
4	f	0	5	15	72.1695		GE2	1	45	10	6	m6	MedPosterior	6	16
4	f	0	5	16	50.9127		GE2	1	45	10	6	m6	MedPosterior	6	16
4	f	0	5	17	69.5093		GE2	1	45	10	7	m7	MedPosterior	6	17
4	f	0	5	18	49.7476		GE2	1	45	10	8	m8	MedPosterior	6	18
4	f	0	5	19	52.3024		GE2	1	45	10	8	m8	MedPosterior	6	18
4	f	0	5	20	13.982		GE2	1	45	10	9	m9	MedPosterior	6	19
4	f	0	5	21	49.8607		GE2	1	45	10	9	m9	MedPosterior	6	19
4	f	0	5	22			GE2	1	45	10	9	m9		#N/A	19
4	f	0	5	23	65.5472		GE2	1	45	10	10	m10	MedPosterior	6	20
4	f	0	5	24	28.8327		GE2	1	45	10	10	m10	MedPosterior	6	20
4	f	0	6	190612b_1760	63.0735		GE2	1	45	3	pm	Lpm	Lateral	2	6
4	f	0	6	2	26.4004		GE2	1	45	3	crus2	Lcrus2	Lateral	2	5
4	f	0	6	3	58.7679		GE2	1	45	3	crus2	Lcrus2	Lateral	2	5
4	f	0	6	4	45.6368		GE2	1	45	3	crus1	Lcrus1	Lateral	2	4
4	f	0	6	5	81.4448		GE2	1	45	3	sim	Lsim	Lateral	2	3
4	f	0	6	6	20.5935		GE2	1	45	7	crus2	icrus2	IntPosterior	4	9
4	f	0	6	7	57.128		GE2	1	45	7	crus2	icrus2	IntPosterior	4	9
4	f	0	6	8	44.6822		GE2	1	45	7	crus1	icrus1	IntPosterior	4	8
4	f	0	6	9	84.4364		GE2	1	45	7	crus1	icrus1	IntPosterior	4	8
4	f	0	6	10	55.6306		GE2	1	45	7	4/5	i4/5	IntAnterior	3	12
4	f	0	6	11	32.0062		GE2	1	45	7	4/5	i4/5	IntAnterior	3	12
4	f	0	6	12	44.8959		GE2	1	45	13	10	m10	MedPosterior	6	20
4	f	0	6	13	19.3428		GE2	1	45	13	10	m10	MedPosterior	6	20
4	f	0	6	14	38.3539		GE2	1	45	13	9	m9	MedPosterior	6	19
4	f	0	6	15	59.8191		GE2	1	45	13	9	m9	MedPosterior	6	19
4	f	0	6	16	121.951		GE2	1	45	13	9	m9	MedPosterior	6	19
4	f	0	6	17	82.4449		GE2	1	45	13	8	m8	MedPosterior	6	18
4	f	0	6	18	70.1844		GE2	1	45	13	8	m8	MedPosterior	6	18
4	f	0	6	19	86.4765		GE2	1	45	13	7	m7	MedPosterior	6	17
4	f	0	6	20	83.1947		GE2	1	45	13	6	m6	MedPosterior	6	16
4	f	0	6	21	69.818		GE2	1	45	13	6	m6	MedPosterior	6	16
4	f	0	6	22	56.497		GE2	1	45	13	4/5	m4/5	MedAnterior	5	15
4	f	0	6	23	56.3167		GE2	1	45	13	4/5	m4/5	MedAnterior	5	15
4	f	0	6	24	89.7458		GE2	1	45	13	4/5	m4/5	MedAnterior	5	15
4	f	0	6	25	15.791		GE2	1	45	13	4/5	m4/5	MedAnterior	5	15
4	f	0	6	26	118.641		GE2	1	45	13	4/5	m4/5	MedAnterior	5	15
4	f	0	6	27			GE2	1	45	13	3	m3		#N/A	14
4	f	0	6	28	50.259		GE2	1	45	13	2	m2	MedAnterior	5	13
4	m	1	7	190619a_1756	19.7463		GE2	1	45	3	crus2	Lcrus2	Lateral	2	5
4	m	1	7	2	91.7583		GE2	1	45	3	crus2	Lcrus2	Lateral	2	5
4	m	1	7	3	31.5277		GE2	1	45	3	crus1	Lcrus1	Lateral	2	4
4	m	1	7	4	68.7976		GE2	1	45	3	sim	Lsim	Lateral	2	3
4	m	1	7	5	58.6009		GE2	1	45	7	sim	isim	IntPosterior	4	7
4	m	1	7	6			GE2	1	45	7	4/5	i4/5		#N/A	12
4	m	1	7	7	116.798		GE2	1	45	7	4/5	i4/5	IntAnterior	3	12
4	m	1	7	8	90.8182		GE2	1	45	7	4/5	i4/5	IntAnterior	3	12
4	m	1	7	9	58.6557		GE2	1	45	11	2	m2	MedAnterior	5	13
4	m	1	7	10	51.1538		GE2	1	45	11	2	m2	MedAnterior	5	13
4	m	1	7	11	88.0685		GE2	1	45	11	3	m3	MedAnterior	5	14
4	m	1	7	12	136.024		GE2	1	45	11	3	m3	MedAnterior	5	14
4	m	1	7	13	55.3309		GE2	1	45	11	3	m3	MedAnterior	5	14
4	m	1	7	14	92.9167		GE2	1	45	11	4/5	m4/5	MedAnterior	5	15
4	m	1	7	15	56.3574		GE2	1	45	11	4/5	m4/5	MedAnterior	5	15
4	m	1	7	16	58.7214		GE2	1	45	11	4/5	m4/5	MedAnterior	5	15
4	m	1	7	17	17.2156		GE2	1	45	11	6	m6	MedPosterior	6	16
4	m	1	7	18	65.8129		GE2	1	45	11	6	m6	MedPosterior	6	16
4	m	1	7	19	54.3659		GE2	1	45	11	7	m7	MedPosterior	6	17
4	m	1	7	20	119.99		GE2	1	45	11	7	m7	MedPosterior	6	17
4	m	1	7	21	79.3687		GE2	1	45	11	8	m8	MedPosterior	6	18
4	m	1	7	22	37.8766		GE2	1	45	11	8	m8	MedPosterior	6	18
4	m	1	7	23	84.5854		GE2	1	45	11	9	m9	MedPosterior	6	19
4	m	1	7	24	36.8085		GE2	1	45	11	9	m9	MedPosterior	6	19
4	m	1	7	25	47.1337		GE2	1	45	11	9	m9	MedPosterior	6	19
4	m	1	7	26	39.0714		GE2	1	45	11	10	m10	MedPosterior	6	20
4	m	1	7	27	45.3128		GE2	1	45	11	10	m10	MedPosterior	6	20
4	m	1	8	190620a_1757	159.832		GE2	1	45	3	sim	Lsim	Lateral	2	3
4	m	1	8	2			GE2	1	45	3	sim	Lsim		#N/A	3
4	m	1	8	3	14.3771		GE2	1	45	3	crus1	Lcrus1	Lateral	2	4
4	m	1	8	4	55.297		GE2	1	45	3	crus1	Lcrus1	Lateral	2	4
4	m	1	8	5	185.334		GE2	1	45	3	crus2	Lcrus2	Lateral	2	5
4	m	1	8	6	13.392		GE2	1	45	3	crus2	Lcrus2	Lateral	2	5
4	m	1	8	7	65.1801		GE2	1	45	6	cop	icop	IntPosterior	4	11
4	m	1	8	8	41.574		GE2	1	45	6	cop	icop	IntPosterior	4	11
4	m	1	8	9	32.6315		GE2	1	45	6	pm	ipm	IntPosterior	4	10
4	m	1	8	10	115.313		GE2	1	45	6	pm	ipm	IntPosterior	4	10
4	m	1	8	11	30.8264		GE2	1	45	6	crus2	icrus2	IntPosterior	4	9
4	m	1	8	12	86.431		GE2	1	45	6	crus2	icrus2	IntPosterior	4	9
4	m	1	8	13	68.9242		GE2	1	45	6	crus1	icrus1	IntPosterior	4	8
4	m	1	8	14	36.2028		GE2	1	45	6	crus1	icrus1	IntPosterior	4	8
4	m	1	8	15	61.7395		GE2	1	45	6	sim	isim	IntPosterior	4	7
4	m	1	8	16	29.5737		GE2	1	45	6	sim	isim	IntPosterior	4	7
4	m	1	8	17	59.6373		GE2	1	45	6	4/5	i4/5	IntAnterior	3	12
4	m	1	8	18	15.3232		GE2	1	45	11	10	m10	MedPosterior	6	20
4	m	1	8	19	25.4155		GE2	1	45	11	10	m10	MedPosterior	6	20
4	m	1	8	20	54.9593		GE2	1	45	11	9	m9	MedPosterior	6	19
4	m	1	8	21	55.1056		GE2	1	45	11	9	m9	MedPosterior	6	19
4	m	1	8	22	77.6878		GE2	1	45	11	9	m9	MedPosterior	6	19
4	m	1	8	23	102.78		GE2	1	45	11	8	m8	MedPosterior	6	18
4	m	1	8	24	109.731		GE2	1	45	11	8	m8	MedPosterior	6	18
4	m	1	8	25	96.7883		GE2	1	45	11	7	m7	MedPosterior	6	17
4	m	1	8	26	63.1772		GE2	1	45	11	6	m6	MedPosterior	6	16
4	m	1	8	27	96.2694		GE2	1	45	11	6	m6	MedPosterior	6	16
4	m	1	8	28	57.3404		GE2	1	45	11	4/5	m4/5	MedAnterior	5	15
4	m	1	8	29	69.6009		GE2	1	45	11	4/5	m4/5	MedAnterior	5	15
4	m	1	8	30	28.063		GE2	1	45	11	4/5	m4/5	MedAnterior	5	15
4	m	1	8	31	31.8856		GE2	1	45	11	4/5	m4/5	MedAnterior	5	15
4	m	1	8	32	33.3072		GE2	1	45	11	3	m3	MedAnterior	5	14
4	m	1	8	33	89.588		GE2	1	45	11	3	m3	MedAnterior	5	14
4	m	1	8	34	70.452		GE2	1	45	11	2	m2	MedAnterior	5	13
4	f	0	9	190725a_1569	54.9223		GE3	2	120	3	pm	Lpm	Lateral	2	6
4	f	0	9	2	87.7372		GE3	2	120	5	cop	icop	IntPosterior	4	11
4	f	0	9	3	82.017		GE3	2	120	5	pm	ipm	IntPosterior	4	10
4	f	0	9	4	90.8724		GE3	2	120	5	crus1	icrus1	IntPosterior	4	8
4	f	0	9	5	25.888		GE3	2	120	10	2	m2	MedAnterior	5	13
4	f	0	9	6	38.4575		GE3	2	120	10	2	m2	MedAnterior	5	13
4	f	0	9	7	41.2711		GE3	2	120	10	3	m3	MedAnterior	5	14
4	f	0	9	8	48.0474		GE3	2	120	10	4/5	m4/5	MedAnterior	5	15
4	f	0	9	9	58.7401		GE3	2	120	10	4/5	m4/5	MedAnterior	5	15
4	f	0	9	10	76.9776		GE3	2	120	10	4/5	m4/5	MedAnterior	5	15
4	f	0	9	11	106.405		GE3	2	120	10	6	m6	MedPosterior	6	16
4	f	0	9	12	106.642		GE3	2	120	10	7	m7	MedPosterior	6	17
4	f	0	9	13	42.4457		GE3	2	120	10	7	m7	MedPosterior	6	17
4	f	0	9	14	59.7892		GE3	2	120	10	8	m8	MedPosterior	6	18
4	f	0	9	15	33.8913		GE3	2	120	10	8	m8	MedPosterior	6	18
4	f	0	9	16	52.9047		GE3	2	120	10	9	m9	MedPosterior	6	19
4	f	0	9	17	11.8624		GE3	2	120	10	10	m10	MedPosterior	6	20
4	f	0	9	18	16.2514		GE3	2	120	10	10	m10	MedPosterior	6	20
4	f	0	10	190726a_1567	39.4324		GE3	2	120	3	sim	Lsim	Lateral	2	3
4	f	0	10	2			GE3	2	120	3	sim	Lsim		#N/A	3
4	f	0	10	3	102.039		GE3	2	120	3	crus1	Lcrus1	Lateral	2	4
4	f	0	10	4	84.3288		GE3	2	120	3	crus1	Lcrus1	Lateral	2	4
4	f	0	10	5			GE3	2	120	3	crus2	Lcrus2		#N/A	5
4	f	0	10	6	78.5927		GE3	2	120	3	crus2	Lcrus2	Lateral	2	5
4	f	0	10	7	56.5192		GE3	2	120	6	cop	icop	IntPosterior	4	11
4	f	0	10	8	105.176		GE3	2	120	6	pm	ipm	IntPosterior	4	10
4	f	0	10	9	69.5264		GE3	2	120	6	crus2	icrus2	IntPosterior	4	9
4	f	0	10	10	55.3783		GE3	2	120	6	crus1	icrus1	IntPosterior	4	8
4	f	0	10	11	39.096		GE3	2	120	6	sim	isim	IntPosterior	4	7
4	f	0	10	12	15.9156		GE3	2	120	6	4/5	i4/5	IntAnterior	3	12
4	f	0	10	13	47.3183		GE3	2	120	10	2	m2	MedAnterior	5	13
4	f	0	10	14	46.8322		GE3	2	120	10	2	m2	MedAnterior	5	13
4	f	0	10	15	97.4679		GE3	2	120	10	3	m3	MedAnterior	5	14
4	f	0	10	16	80.7356		GE3	2	120	10	3	m3	MedAnterior	5	14
4	f	0	10	17	58.3099		GE3	2	120	10	3	m3	MedAnterior	5	14
4	f	0	10	18	93.1476		GE3	2	120	10	4/5	m4/5	MedAnterior	5	15
4	f	0	10	19	64.4806		GE3	2	120	10	4/5	m4/5	MedAnterior	5	15
4	f	0	10	20	72.7493		GE3	2	120	10	4/5	m4/5	MedAnterior	5	15
4	f	0	10	21	47.4988		GE3	2	120	10	6	m6	MedPosterior	6	16
4	f	0	10	22	91.6862		GE3	2	120	10	6	m6	MedPosterior	6	16
4	f	0	10	23	92.8179		GE3	2	120	10	6	m6	MedPosterior	6	16
4	f	0	10	24	75.4684		GE3	2	120	10	8	m8	MedPosterior	6	18
4	f	0	10	25	51.5803		GE3	2	120	10	9	m9	MedPosterior	6	19
4	f	0	10	26	38.0605		GE3	2	120	10	10	m10	MedPosterior	6	20
4	m	1	11	190807a_1622	35.685		GE3	2	120	2	sim	Lsim	Lateral	2	3
4	m	1	11	2			GE3	2	120	2	crus1	Lcrus1		#N/A	4
4	m	1	11	3	111.373		GE3	2	120	2	crus1	Lcrus1	Lateral	2	4
4	m	1	11	4	48.1324		GE3	2	120	2	crus2	Lcrus2	Lateral	2	5
4	m	1	11	5			GE3	2	120	2	crus2	Lcrus2		#N/A	5
4	m	1	11	6	92.8383		GE3	2	120	2	crus2	Lcrus2	Lateral	2	5
4	m	1	11	7	22.2253		GE3	2	120	2	pfl	Lpfl	Vestibular	1	1
4	m	1	11	8	48.0115		GE3	2	120	6	pm	ipm	IntPosterior	4	10
4	m	1	11	9	91.8679		GE3	2	120	6	pm	ipm	IntPosterior	4	10
4	m	1	11	10	75.6791		GE3	2	120	6	crus2	icrus2	IntPosterior	4	9
4	m	1	11	11	124.072		GE3	2	120	6	crus2	icrus2	IntPosterior	4	9
4	m	1	11	12	55.9171		GE3	2	120	6	crus1	icrus1	IntPosterior	4	8
4	m	1	11	13	23.9297		GE3	2	120	12	10	m10	MedPosterior	6	20
4	m	1	11	14	49.2932		GE3	2	120	12	10	m10	MedPosterior	6	20
4	m	1	11	15	37.5509		GE3	2	120	12	9	m9	MedPosterior	6	19
4	m	1	11	16	50.1778		GE3	2	120	12	9	m9	MedPosterior	6	19
4	m	1	11	17	51.2679		GE3	2	120	12	9	m9	MedPosterior	6	19
4	m	1	11	18	42.3976		GE3	2	120	12	9	m9	MedPosterior	6	19
4	m	1	11	19	40.8608		GE3	2	120	12	8	m8	MedPosterior	6	18
4	m	1	11	20	78.1346		GE3	2	120	12	7	m7	MedPosterior	6	17
4	m	1	11	21	93.4854		GE3	2	120	12	6	m6	MedPosterior	6	16
4	m	1	11	22	78.4858		GE3	2	120	12	4/5	m4/5	MedAnterior	5	15
4	m	1	11	23	71.3888		GE3	2	120	12	4/5	m4/5	MedAnterior	5	15
4	m	1	11	24	37.3118		GE3	2	120	12	4/5	m4/5	MedAnterior	5	15
4	m	1	11	25	71.7382		GE3	2	120	12	3	m3	MedAnterior	5	14
4	m	1	11	26	107.591		GE3	2	120	12	3	m3	MedAnterior	5	14
4	m	1	11	27	98.5888		GE3	2	120	12	2	m2	MedAnterior	5	13
4	m	1	11	28	62.7824		GE3	2	120	12	2	m2	MedAnterior	5	13
4	m	1	12	190809a_1638	44.6036		GE3	2	120	2	crus1	Lcrus1	Lateral	2	4
4	m	1	12	2	19.2633		GE3	2	120	2	crus1	Lcrus1	Lateral	2	4
4	m	1	12	3	175.487		GE3	2	120	2	crus2	Lcrus2	Lateral	2	5
4	m	1	12	4	43.6373		GE3	2	120	5	pm	ipm	IntPosterior	4	10
4	m	1	12	5	75.9602		GE3	2	120	5	crus2	icrus2	IntPosterior	4	9
4	m	1	12	6	59.5739		GE3	2	120	5	crus2	icrus2	IntPosterior	4	9
4	m	1	12	7	60.323		GE3	2	120	5	crus1	icrus1	IntPosterior	4	8
4	m	1	12	8	45.3193		GE3	2	120	5	cop	icop	IntPosterior	4	11
4	m	1	12	9	53.3052		GE3	2	120	11	10	m10	MedPosterior	6	20
4	m	1	12	10	24.8605		GE3	2	120	11	10	m10	MedPosterior	6	20
4	m	1	12	11	49.69		GE3	2	120	11	9	m9	MedPosterior	6	19
4	m	1	12	12	91.9777		GE3	2	120	11	9	m9	MedPosterior	6	19
4	m	1	12	13	88.4845		GE3	2	120	11	9	m9	MedPosterior	6	19
4	m	1	12	14	89.8293		GE3	2	120	11	8	m8	MedPosterior	6	18
4	m	1	12	15	75.0625		GE3	2	120	11	8	m8	MedPosterior	6	18
4	m	1	12	16	61.9211		GE3	2	120	11	7	m7	MedPosterior	6	17
4	m	1	12	17	50.854		GE3	2	120	11	6	m6	MedPosterior	6	16
4	m	1	12	18	42.9226		GE3	2	120	11	6	m6	MedPosterior	6	16
4	m	1	12	19	33.3403		GE3	2	120	11	6	m6	MedPosterior	6	16
4	m	1	12	20	63.023		GE3	2	120	11	4/5	m4/5	MedAnterior	5	15
4	m	1	12	21	47.1256		GE3	2	120	11	4/5	m4/5	MedAnterior	5	15
4	m	1	12	22	44.8305		GE3	2	120	11	4/5	m4/5	MedAnterior	5	15
4	m	1	12	23	67.6339		GE3	2	120	11	4/5	m4/5	MedAnterior	5	15
4	m	1	12	24	44.6226		GE3	2	120	11	4/5	m4/5	MedAnterior	5	15
4	m	1	12	25	48.8865		GE3	2	120	11	3	m3	MedAnterior	5	14
4	m	1	12	26	37.4047		GE3	2	120	11	3	m3	MedAnterior	5	14
4	m	1	12	27	68.4413		GE3	2	120	11	3	m3	MedAnterior	5	14
4	m	1	12	28	48.5149		GE3	2	120	11	3	m3	MedAnterior	5	14
4	m	1	12	29	41.4309		GE3	2	120	11	2	m2	MedAnterior	5	13
4	m	1	12	30	65.2985		GE3	2	120	11	2	m2	MedAnterior	5	13
4	m	1	12	31	42.9226		GE3	2	120	11	2	m2	MedAnterior	5	13
4	m	1	13	190819a_1706	92.8735		GE3	2	120	3	pm	Lpm	Lateral	2	6
4	m	1	13	2	49.5277		GE3	2	120	3	pm	Lpm	Lateral	2	6
4	m	1	13	3	130.165		GE3	2	120	3	crus2	Lcrus2	Lateral	2	5
4	m	1	13	4	135.075		GE3	2	120	3	crus2	Lcrus2	Lateral	2	5
4	m	1	13	5			GE3	2	120	3	crus1	Lcrus1		#N/A	4
4	m	1	13	6			GE3	2	120	3	crus1	Lcrus1		#N/A	4
4	m	1	13	7			GE3	2	120	6	cop	icop		#N/A	11
4	m	1	13	8	80.8111		GE3	2	120	6	pm	ipm	IntPosterior	4	10
4	m	1	13	9	121.586		GE3	2	120	6	crus1	icrus1	IntPosterior	4	8
4	m	1	13	10	52.9255		GE3	2	120	6	crus1	icrus1	IntPosterior	4	8
4	m	1	13	11			GE3	2	120	6	4/5	i4/5		#N/A	12
4	m	1	13	12	92.6198		GE3	2	120	12	10	m10	MedPosterior	6	20
4	m	1	13	13	56.3609		GE3	2	120	12	10	m10	MedPosterior	6	20
4	m	1	13	14	87.548		GE3	2	120	12	9	m9	MedPosterior	6	19
4	m	1	13	15	70.9531		GE3	2	120	12	9	m9	MedPosterior	6	19
4	m	1	13	16	102.015		GE3	2	120	12	9	m9	MedPosterior	6	19
4	m	1	13	17	43.3829		GE3	2	120	12	8	m8	MedPosterior	6	18
4	m	1	13	18	86.5878		GE3	2	120	12	7	m7	MedPosterior	6	17
4	m	1	13	19	90.4006		GE3	2	120	12	6	m6	MedPosterior	6	16
4	m	1	13	20	66.4648		GE3	2	120	12	6	m6	MedPosterior	6	16
4	m	1	13	21	166.322		GE3	2	120	12	4/5	m4/5	MedAnterior	5	15
4	m	1	13	22	73.6486		GE3	2	120	12	4/5	m4/5	MedAnterior	5	15
4	m	1	13	23	114.643		GE3	2	120	12	4/5	m4/5	MedAnterior	5	15
4	m	1	13	24	85.7837		GE3	2	120	12	3	m3	MedAnterior	5	14
4	m	1	13	25	68.2552		GE3	2	120	12	3	m3	MedAnterior	5	14
4	m	1	13	26	69.1511		GE3	2	120	12	2	m2	MedAnterior	5	13
4	m	1	13	27	80.8842		GE3	2	120	12	2	m2	MedAnterior	5	13
4	f	0	14	190822_1724	43.9557		GE3	2	120	3	sim	Lsim	Lateral	2	3
4	f	0	14	1	60.517		GE3	2	120	3	sim	Lsim	Lateral	2	3
4	f	0	14	2	19.9639		GE3	2	120	3	crus1	Lcrus1	Lateral	2	4
4	f	0	14	3	82.3753		GE3	2	120	3	crus2	Lcrus2	Lateral	2	5
4	f	0	14	4	81.8216		GE3	2	120	3	crus2	Lcrus2	Lateral	2	5
4	f	0	14	5	31.7221		GE3	2	120	3	crus2	Lcrus2	Lateral	2	5
4	f	0	14	6	106.712		GE3	2	120	3	pm	Lpm	Lateral	2	6
4	f	0	14	7	30.5036		GE3	2	120	6	4/5	i4/5	IntAnterior	3	12
4	f	0	14	8	60.6972		GE3	2	120	6	sim	isim	IntPosterior	4	7
4	f	0	14	9	61.3396		GE3	2	120	6	crus1	icrus1	IntPosterior	4	8
4	f	0	14	10	41.2864		GE3	2	120	6	crus2	icrus2	IntPosterior	4	9
4	f	0	14	11	165.025		GE3	2	120	6	crus2	icrus2	IntPosterior	4	9
4	f	0	14	12	97.2673		GE3	2	120	6	pm	ipm	IntPosterior	4	10
4	f	0	14	13	126.879		GE3	2	120	12	2	m2	MedAnterior	5	13
4	f	0	14	14	95.8982		GE3	2	120	12	2	m2	MedAnterior	5	13
4	f	0	14	15	39.6086		GE3	2	120	12	3	m3	MedAnterior	5	14
4	f	0	14	16	7.43218		GE3	2	120	12	3	m3	MedAnterior	5	14
4	f	0	14	17	98.8549		GE3	2	120	12	3	m3	MedAnterior	5	14
4	f	0	14	18	88.7441		GE3	2	120	12	4/5	m4/5	MedAnterior	5	15
4	f	0	14	19	55.4362		GE3	2	120	12	4/5	m4/5	MedAnterior	5	15
4	f	0	14	20	56.1166		GE3	2	120	12	6	m6	MedPosterior	6	16
4	f	0	14	21	119.18		GE3	2	120	12	6	m6	MedPosterior	6	16
4	f	0	14	22	85.0423		GE3	2	120	12	7	m7	MedPosterior	6	17
4	f	0	14	23	73.145		GE3	2	120	12	7	m7	MedPosterior	6	17
4	f	0	14	24	89.734		GE3	2	120	12	8	m8	MedPosterior	6	18
4	f	0	14	25	52.7943		GE3	2	120	12	8	m8	MedPosterior	6	18
4	f	0	14	26	69.7364		GE3	2	120	12	9	m9	MedPosterior	6	19
4	f	0	14	27	128.872		GE3	2	120	12	9	m9	MedPosterior	6	19
4	f	0	14	28	29.3765		GE3	2	120	12	9	m9	MedPosterior	6	19
4	f	0	14	29	28.8466		GE3	2	120	12	10	m10	MedPosterior	6	20
4	f	0	14	30	29.291		GE3	2	120	12	10	m10	MedPosterior	6	20
4	f	0	15	190822a_1725	30.5312		GE3	2	120	3	crus1	Lcrus1	Lateral	2	4
4	f	0	15	2	93.3922		GE3	2	120	7	crus1	icrus1	IntPosterior	4	8
4	f	0	15	3	52.4098		GE3	2	120	7					#N/A
4	f	0	15	4	104.807		GE3	2	120	7	crus1	crus1			#N/A
4	f	0	15	5	56.6057		GE3	2	120	7	crus2	icrus2	IntPosterior	4	9
4	f	0	15	6	15.3677		GE3	2	120	12	10	m10	MedPosterior	6	20
4	f	0	15	7	26.26		GE3	2	120	12	10	m10	MedPosterior	6	20
4	f	0	15	8	29.1393		GE3	2	120	12	9	m9	MedPosterior	6	19
4	f	0	15	9	28.9167		GE3	2	120	12	9	m9	MedPosterior	6	19
4	f	0	15	10	45.4499		GE3	2	120	12	9	m9	MedPosterior	6	19
4	f	0	15	11	49.5868		GE3	2	120	12	7	m7	MedPosterior	6	17
4	f	0	15	12	119.779		GE3	2	120	12	7	m7	MedPosterior	6	17
4	f	0	15	13	74.5126		GE3	2	120	12	6	m6	MedPosterior	6	16
4	f	0	15	14	114.535		GE3	2	120	12	6	m6	MedPosterior	6	16
4	f	0	15	15	61.1185		GE3	2	120	12	4/5	m4/5	MedAnterior	5	15
4	f	0	15	16	86.0063		GE3	2	120	12	4/5	m4/5	MedAnterior	5	15
4	f	0	15	17	67.1814		GE3	2	120	12	4/5	m4/5	MedAnterior	5	15
4	f	0	15	18	140.574		GE3	2	120	12	3	m3	MedAnterior	5	14
4	f	0	15	19	45.7457		GE3	2	120	12	3	m3	MedAnterior	5	14
4	f	0	15	20			GE3	2	120	12				#N/A	#N/A
4	f	0	15	21	85.7806		GE3	2	120	12	2	m2	MedAnterior	5	13
4	f	0	15	22	89.999		GE3	2	120	12	2	m2	MedAnterior	5	13
4	m	1	16	190903_1735	101.73		GE3	2	120	3	pm	Lpm	Lateral	2	6
4	m	1	16	2			GE3	2	120	3	pm	Lpm		#N/A	6
4	m	1	16	3	65.5769		GE3	2	120	3	crus2	Lcrus2	Lateral	2	5
4	m	1	16	4			GE3	2	120	3	crus2	Lcrus2		#N/A	5
4	m	1	16	5			GE3	2	120	3	crus1	Lcrus1		#N/A	4
4	m	1	16	6	11.4502		GE3	2	120	3	crus1	Lcrus1	Lateral	2	4
4	m	1	16	7			GE3	2	120	3	sim	Lsim		#N/A	3
4	m	1	16	8	44.7149		GE3	2	120	3	sim	Lsim	Lateral	2	3
4	m	1	16	9	86.4296		GE3	2	120	6	cop	icop	IntPosterior	4	11
4	m	1	16	10			GE3	2	120	6	pm	ipm		#N/A	10
4	m	1	16	11	134.936		GE3	2	120	6	crus2	icrus2	IntPosterior	4	9
4	m	1	16	12	67.923		GE3	2	120	6	crus1	icrus1	IntPosterior	4	8
4	m	1	16	13	62.2711		GE3	2	120	6	4/5	i4/5	IntAnterior	3	12
4	m	1	16	14	59.4302		GE3	2	120	11	2	m2	MedAnterior	5	13
4	m	1	16	15	65.6933		GE3	2	120	11	2	m2	MedAnterior	5	13
4	m	1	16	16	89.5901		GE3	2	120	11	3	m3	MedAnterior	5	14
4	m	1	16	17	63.806		GE3	2	120	11	3	m3	MedAnterior	5	14
4	m	1	16	18	92.8632		GE3	2	120	11	3	m3	MedAnterior	5	14
4	m	1	16	19	96.3138		GE3	2	120	11	4/5	m4/5	MedAnterior	5	15
4	m	1	16	20	87.4517		GE3	2	120	11	4/5	m4/5	MedAnterior	5	15
4	m	1	16	21	101.274		GE3	2	120	11	4/5	m4/5	MedAnterior	5	15
4	m	1	16	22	103.25		GE3	2	120	11	4/5	m4/5	MedAnterior	5	15
4	m	1	16	23	67.4735		GE3	2	120	11	4/5	m4/5	MedAnterior	5	15
4	m	1	16	24	105.707		GE3	2	120	11	6	m6	MedPosterior	6	16
4	m	1	16	25	164.5		GE3	2	120	11	6	m6	MedPosterior	6	16
4	m	1	16	26	83.4552		GE3	2	120	11	7	m7	MedPosterior	6	17
4	m	1	16	27	88.1433		GE3	2	120	11	8	m8	MedPosterior	6	18
4	m	1	16	28	80.8953		GE3	2	120	11	8	m8	MedPosterior	6	18
4	m	1	16	29	32.7002		GE3	2	120	11	9	m9	MedPosterior	6	19
4	m	1	16	30	86.0352		GE3	2	120	11	9	m9	MedPosterior	6	19
4	m	1	16	31	48.2755		GE3	2	120	11	9	m9	MedPosterior	6	19
4	m	1	16	32			GE3	2	120	11	10	m10		#N/A	20
4	m	1	16	33	41.829		GE3	2	120	11	10	m10	MedPosterior	6	20
4	m	1	16	34	21.6671		GE3	2	120	11	10	m10	MedPosterior	6	20
4	m	1	17	191004a_1449	73.8418		GE4	3	210	3	sim	Lsim	Lateral	2	3
4	m	1	17	2	93.0851		GE4	3	210	3	sim	Lsim	Lateral	2	3
4	m	1	17	3	32.0745		GE4	3	210	3	sim	Lsim	Lateral	2	3
4	m	1	17	4	215.56		GE4	3	210	3	crus1	Lcrus1	Lateral	2	4
4	m	1	17	5	39.7027		GE4	3	210	3	crus1	Lcrus1	Lateral	2	4
4	m	1	17	6	143.594		GE4	3	210	3	crus2	Lcrus2	Lateral	2	5
4	m	1	17	7	29.7527		GE4	3	210	3	pm	Lpm	Lateral	2	6
4	m	1	17	8	35.5655		GE4	3	210	6	crus2	icrus2	IntPosterior	4	9
4	m	1	17	9	55.9284		GE4	3	210	6	sim	isim	IntPosterior	4	7
4	m	1	17	10	25.0702		GE4	3	210	6	4/5	i4/5	IntAnterior	3	12
4	m	1	17	11	55.7909		GE4	3	210	11	2	m2	MedAnterior	5	13
4	m	1	17	12	75.7964		GE4	3	210	11	2	m2	MedAnterior	5	13
4	m	1	17	13	65.2595		GE4	3	210	11	3	m3	MedAnterior	5	14
4	m	1	17	14	77.6302		GE4	3	210	11	3	m3	MedAnterior	5	14
4	m	1	17	15	43.0858		GE4	3	210	11	4/5	m4/5	MedAnterior	5	15
4	m	1	17	16	57.0962		GE4	3	210	11	4/5	m4/5	MedAnterior	5	15
4	m	1	17	17	52.8278		GE4	3	210	11	4/5	m4/5	MedAnterior	5	15
4	m	1	17	18	42.4123		GE4	3	210	11	4/5	m4/5	MedAnterior	5	15
4	m	1	17	19	108.607		GE4	3	210	11	6	m6	MedPosterior	6	16
4	m	1	17	20	71.2976		GE4	3	210	11	6	m6	MedPosterior	6	16
4	m	1	17	21	100.426		GE4	3	210	11	7	m7	MedPosterior	6	17
4	m	1	17	22	60.6612		GE4	3	210	11	7	m7	MedPosterior	6	17
4	m	1	17	23	37.552		GE4	3	210	11	8	m8	MedPosterior	6	18
4	m	1	17	24	56.3871		GE4	3	210	11	9	m9	MedPosterior	6	19
4	m	1	17	25	44.7974		GE4	3	210	11	10	m10	MedPosterior	6	20
4	m	1	17	26	26.9794		GE4	3	210	11	10	m10	MedPosterior	6	20				#NAME?
4	m	1	18	191004b_1447	4.79366		GE4	3	210	3	crus2	Lcrus2	Lateral	2	5
4	m	1	18	2	6.84153		GE4	3	210	3	crus2	Lcrus2	Lateral	2	5
4	m	1	18	3	70.963		GE4	3	210	3	crus2	Lcrus2	Lateral	2	5
4	m	1	18	4	109.244		GE4	3	210	3	crus2	Lcrus2	Lateral	2	5
4	m	1	18	5	58.3697		GE4	3	210	6	4/5	i4/5	IntAnterior	3	12
4	m	1	18	6	42.9427		GE4	3	210	6	sim	isim	IntPosterior	4	7
4	m	1	18	7	104.683		GE4	3	210	6	crus2	icrus2	IntPosterior	4	9
4	m	1	18	8	104.807		GE4	3	210	6	pm	ipm	IntPosterior	4	10
4	m	1	18	9	71.2869		GE4	3	210	12	2	m2	MedAnterior	5	13
4	m	1	18	10	77.1106		GE4	3	210	12	2	m2	MedAnterior	5	13
4	m	1	18	11	63.6249		GE4	3	210	12	2	m2	MedAnterior	5	13
4	m	1	18	12	88.1527		GE4	3	210	12	3	m3	MedAnterior	5	14
4	m	1	18	13	70.9111		GE4	3	210	12	3	m3	MedAnterior	5	14
4	m	1	18	14	132.57		GE4	3	210	12	3	m3	MedAnterior	5	14
4	m	1	18	15	92.9101		GE4	3	210	12	4/5	m4/5	MedAnterior	5	15
4	m	1	18	16	79.9632		GE4	3	210	12	4/5	m4/5	MedAnterior	5	15
4	m	1	18	17	133.599		GE4	3	210	12	4/5	m4/5	MedAnterior	5	15
4	m	1	18	18	199.803		GE4	3	210	12	4/5	m4/5	MedAnterior	5	15
4	m	1	18	19	145.603		GE4	3	210	12	6	m6	MedPosterior	6	16
4	m	1	18	20	116.924		GE4	3	210	12	6	m6	MedPosterior	6	16
4	m	1	18	21	67.4069		GE4	3	210	12	6	m6	MedPosterior	6	16
4	m	1	18	22	36.8222		GE4	3	210	12	7	m7	MedPosterior	6	17
4	m	1	18	23	45.8534		GE4	3	210	12	7	m7	MedPosterior	6	17
4	m	1	18	24	80.6473		GE4	3	210	12	7	m7	MedPosterior	6	17
4	m	1	18	25	73.348		GE4	3	210	12	8	m8	MedPosterior	6	18
4	m	1	18	26	46.5944		GE4	3	210	12	8	m8	MedPosterior	6	18
4	m	1	18	27	65.7597		GE4	3	210	12	9	m9	MedPosterior	6	19
4	m	1	18	28	36.7702		GE4	3	210	12	9	m9	MedPosterior	6	19
4	m	1	18	29	27.1571		GE4	3	210	12	10	m10	MedPosterior	6	20
4	m	1	18	30	29.2583		GE4	3	210	12	10	m10	MedPosterior	6	20
4	f	0	19	191030_1576	9.93688		GE4	3	210	3	sim	Lsim	Lateral	2	3
4	f	0	19		111.843		GE4	3	210	3	sim	Lsim	Lateral	2	3
4	f	0	19		5.19726		GE4	3	210	6	4/5	i4/5	IntAnterior	3	12
4	f	0	19		125.364		GE4	3	210	6	sim	isim	IntPosterior	4	7
4	f	0	19		16.4626		GE4	3	210	11	10	m10	MedPosterior	6	20
4	f	0	19		52.2205		GE4	3	210	11	10	m10	MedPosterior	6	20
4	f	0	19		54.6222		GE4	3	210	11	9	m9	MedPosterior	6	19
4	f	0	19		59.9663		GE4	3	210	11	9	m9	MedPosterior	6	19
4	f	0	19		56.6704		GE4	3	210	11	9	m9	MedPosterior	6	19
4	f	0	19		67.7226		GE4	3	210	11	9	m9	MedPosterior	6	19
4	f	0	19		97.0409		GE4	3	210	11	8	m8	MedPosterior	6	18
4	f	0	19		77.1628		GE4	3	210	11	8	m8	MedPosterior	6	18
4	f	0	19		119.23		GE4	3	210	11	8	m8	MedPosterior	6	18
4	f	0	19		84.4068		GE4	3	210	11	6	m6	MedPosterior	6	16
4	f	0	19		88.9953		GE4	3	210	11	6	m6	MedPosterior	6	16
4	f	0	19		77.0738		GE4	3	210	11	4/5	m4/5	MedAnterior	5	15
4	f	0	19		103.581		GE4	3	210	11	4/5	m4/5	MedAnterior	5	15
4	f	0	19		96.5491		GE4	3	210	11	4/5	m4/5	MedAnterior	5	15
4	f	0	19		64.0476		GE4	3	210	11	3	m3	MedAnterior	5	14
4	f	0	19		86.6929		GE4	3	210	11	3	m3	MedAnterior	5	14
4	f	0	19		65.9604		GE4	3	210	11	3	m3	MedAnterior	5	14
4	f	0	19		217.493		GE4	3	210	11	3	m3	MedAnterior	5	14
4	f	0	19		119.197		GE4	3	210	11	2	m2	MedAnterior	5	13
4	f	0	19		111.598		GE4	3	210	11	2	m2	MedAnterior	5	13
4	f	0	19		121.211		GE4	3	210	11	2	m2	MedAnterior	5	13
4	f	0	20	191031_1616	49.4312		GE4	3	210	2	crus2	Lcrus2	Lateral	2	5
4	f	0	20	2			GE4	3	210	2				#N/A	#N/A
4	f	0	20	3	160.27		GE4	3	210	2	crus2	Lcrus2	Lateral	2	5
4	f	0	20	4	160.337		GE4	3	210	2	crus2	Lcrus2	Lateral	2	5
4	f	0	20	5	66.1968		GE4	3	210	2	fl	Lfl	Vestibular	1	2
4	f	0	20	6			GE4	3	210	6	4/5	i4/5		#N/A	12
4	f	0	20	7	38.4041		GE4	3	210	6	sim	isim	IntPosterior	4	7
4	f	0	20	8			GE4	3	210	6	crus2	icrus2		#N/A	9
4	f	0	20	9	75.2589		GE4	3	210	6	crus2	icrus2	IntPosterior	4	9
4	f	0	20	10			GE4	3	210	6	pm	ipm		#N/A	10
4	f	0	20	11	23.4529		GE4	3	210	12	10	m10	MedPosterior	6	20
4	f	0	20	12	23.293		GE4	3	210	12	10	m10	MedPosterior	6	20
4	f	0	20	13	61.7144		GE4	3	210	12	9	m9	MedPosterior	6	19
4	f	0	20	14	56.9229		GE4	3	210	12	9	m9	MedPosterior	6	19
4	f	0	20	15	47.5687		GE4	3	210	12	9	m9	MedPosterior	6	19
4	f	0	20	16	43.321		GE4	3	210	12	9	m9	MedPosterior	6	19
4	f	0	20	17			GE4	3	210	12	8	m8		#N/A	18
4	f	0	20	18	112.179		GE4	3	210	12	8	m8	MedPosterior	6	18
4	f	0	20	19	75.2589		GE4	3	210	12	7	m7	MedPosterior	6	17
4	f	0	20	20	93.4871		GE4	3	210	12	7	m7	MedPosterior	6	17
4	f	0	20	21	113.527		GE4	3	210	12	6	m6	MedPosterior	6	16
4	f	0	20	22	73.6129		GE4	3	210	12	6	m6	MedPosterior	6	16
4	f	0	20	23	59.584		GE4	3	210	12	6	m6	MedPosterior	6	16
4	f	0	20	24			GE4	3	210	12	4/5	m4/5		#N/A	15
4	f	0	20	25	179.157		GE4	3	210	12	4/5	m4/5	MedAnterior	5	15
4	f	0	20	26	68.7565		GE4	3	210	12	4/5	m4/5	MedAnterior	5	15
4	f	0	20	27	43.8009		GE4	3	210	12	3	m3	MedAnterior	5	14
4	f	0	20	28	133.998		GE4	3	210	12	3	m3	MedAnterior	5	14
4	f	0	20	29	85.0093		GE4	3	210	12	3	m3	MedAnterior	5	14
4	f	0	20	30	93.411		GE4	3	210	12	2	m2	MedAnterior	5	13
4	f	0	20	31	93.218		GE4	3	210	12	2	m2	MedAnterior	5	13
4	f	0	20	32	37.198		GE4	3	210	12	2	m2	MedAnterior	5	13
4	f	0	20	33	85.4729		GE4	3	210	12	2	m2	MedAnterior	5	13
4	f	0	20	34	109.439		GE4	3	210	12	2	m2	MedAnterior	5	13
4	f	0	21	191101_1575	119.752		GE4	3	210	6	sim	isim	IntPosterior	4	7
4	f	0	21	2			GE4	3	210	6	crus1	icrus1		#N/A	8
4	f	0	21	3			GE4	3	210	6	crus1	icrus1		#N/A	8
4	f	0	21	4	59.0996		GE4	3	210	12	2	m2	MedAnterior	5	13
4	f	0	21	5	79.8312		GE4	3	210	12	2	m2	MedAnterior	5	13
4	f	0	21	6	73.0449		GE4	3	210	12	3	m3	MedAnterior	5	14
4	f	0	21	7	83.8336		GE4	3	210	12	3	m3	MedAnterior	5	14
4	f	0	21	8	130.663		GE4	3	210	12	3	m3	MedAnterior	5	14
4	f	0	21	9	99.1904		GE4	3	210	12	4/5	m4/5	MedAnterior	5	15
4	f	0	21	10			GE4	3	210	12	4/5	m4/5		#N/A	15
4	f	0	21	11	129.009		GE4	3	210	12	6	m6	MedPosterior	6	16
4	f	0	21	12	143.089		GE4	3	210	12	6	m6	MedPosterior	6	16
4	f	0	21	13	106.538		GE4	3	210	12	7	m7	MedPosterior	6	17
4	f	0	21	14	54.0158		GE4	3	210	12	8	m8	MedPosterior	6	18
4	f	0	21	15	141.535		GE4	3	210	12	8	m8	MedPosterior	6	18
4	f	0	21	16	104.151		GE4	3	210	12	8	m8	MedPosterior	6	18
4	f	0	21	17			GE4	3	210	12	9	m9		#N/A	19
4	f	0	21	18	51.0895		GE4	3	210	12	9	m9	MedPosterior	6	19
4	f	0	21	19	63.6046		GE4	3	210	12	9	m9	MedPosterior	6	19
4	f	0	21	20	69.4377		GE4	3	210	12	10	m10	MedPosterior	6	20
4	f	0	21	21	22.9611		GE4	3	210	12	10	m10	MedPosterior	6	20
4	m	1	22	191111a_1642	44.2391		GE4	3	210	3	crus1	Lcrus1	Lateral	2	4
4	m	1	22	2	32.0237		GE4	3	210	3	crus1	Lcrus1	Lateral	2	4
4	m	1	22	3	87.6118		GE4	3	210	6	crus1	icrus1	IntPosterior	4	8
4	m	1	22	4	85.3367		GE4	3	210	6	crus1	icrus1	IntPosterior	4	8
4	m	1	22	5	63.1011		GE4	3	210	6	cop	icop	IntPosterior	4	11
4	m	1	22	6	15.3368		GE4	3	210	12	10	m10	MedPosterior	6	20
4	m	1	22	7	31.4106		GE4	3	210	12	10	m10	MedPosterior	6	20
4	m	1	22	8	35.9214		GE4	3	210	12	10	m10	MedPosterior	6	20
4	m	1	22	9	96.4414		GE4	3	210	12	8	m8	MedPosterior	6	18
4	m	1	22	10	71.567		GE4	3	210	12	8	m8	MedPosterior	6	18
4	m	1	22	11	54.3316		GE4	3	210	12	7	m7	MedPosterior	6	17
4	m	1	22	12	58.9301		GE4	3	210	12	6	m6	MedPosterior	6	16
4	m	1	22	13	74.5787		GE4	3	210	12	6	m6	MedPosterior	6	16
4	m	1	22	14	137.587		GE4	3	210	12	6	m6	MedPosterior	6	16
4	m	1	22	15	109.154		GE4	3	210	12	4/5	m4/5	MedAnterior	5	15
4	m	1	22	16	63.5382		GE4	3	210	12	4/5	m4/5	MedAnterior	5	15
4	m	1	22	17	84.2551		GE4	3	210	12	4/5	m4/5	MedAnterior	5	15
4	m	1	22	18	40.5639		GE4	3	210	12	3	m3	MedAnterior	5	14
4	m	1	22	19	50.9754		GE4	3	210	12	3	m3	MedAnterior	5	14
4	m	1	22	20	103.088		GE4	3	210	12	3	m3	MedAnterior	5	14
4	m	1	22	21	118.215		GE4	3	210	12	2	m2	MedAnterior	5	13
4	m	1	22	22	47.3622		GE4	3	210	12	2	m2	MedAnterior	5	13
4	m	1	22	23	81.0058		GE4	3	210	12	2	m2	MedAnterior	5	13
4	f	0	23	191111b_1645	33.7928		GE4	3	210	3	pm	Lpm	Lateral	2	6
4	f	0	23	2	8.87904		GE4	3	210	3	crus2	Lcrus2	Lateral	2	5
4	f	0	23	3	160.135		GE4	3	210	6	pm	ipm	IntPosterior	4	10
4	f	0	23	4	138.013		GE4	3	210	6	crus2	icrus2	IntPosterior	4	9
4	f	0	23	5	92.0092		GE4	3	210	6	crus1	icrus1	IntPosterior	4	8
4	f	0	23	6	5.36185		GE4	3	210	6	4/5	i4/5	IntAnterior	3	12
4	f	0	23	7	64.5349		GE4	3	210	6	4/5	i4/5	IntAnterior	3	12
4	f	0	23	8	28.9938		GE4	3	210	11	2	m2	MedAnterior	5	13
4	f	0	23	9	47.022		GE4	3	210	11	2	m2	MedAnterior	5	13
4	f	0	23	10	87.4056		GE4	3	210	11	2	m2	MedAnterior	5	13
4	f	0	23	11	95.0607		GE4	3	210	11	3	m3	MedAnterior	5	14
4	f	0	23	12	61.9898		GE4	3	210	11	3	m3	MedAnterior	5	14
4	f	0	23	13			GE4	3	210	11				#N/A	#N/A
4	f	0	23	14	101.162		GE4	3	210	11	4/5	m4/5	MedAnterior	5	15
4	f	0	23	15	60.0971		GE4	3	210	11	4/5	m4/5	MedAnterior	5	15
4	f	0	23	16	86.495		GE4	3	210	11	4/5	m4/5	MedAnterior	5	15
4	f	0	23	17	104.69		GE4	3	210	11	6	m6	MedPosterior	6	16
4	f	0	23	18	109.89		GE4	3	210	11	6	m6	MedPosterior	6	16
4	f	0	23	19	55.3902		GE4	3	210	11	8	m8	MedPosterior	6	18
4	f	0	23	20	92.8236		GE4	3	210	11	8	m8	MedPosterior	6	18
4	f	0	23	21	95.1397		GE4	3	210	11	9	m9	MedPosterior	6	19
4	f	0	23	22	53.1232		GE4	3	210	11	9	m9	MedPosterior	6	19
4	f	0	23	23			GE4	3	210	11	9	m9		#N/A	19
4	f	0	23	24	54.416		GE4	3	210	11	10	m10	MedPosterior	6	20
4	f	0	23	25	21.4541		GE4	3	210	11	10	m10	MedPosterior	6	20
4	f	0	24	200102b_1004	30.3241		GE1	4	400	3	PFl	LPFl	Vestibular	1	1
4	f	0	24	2	117.937		GE1	4	400	3	Sim	LSim	Lateral	2	3
4	f	0	24	3	94.7732		GE1	4	400	5	PM	iPM	IntPosterior	4	10
4	f	0	24	4	104.905		GE1	4	400	5	Crus2	iCrus2	IntPosterior	4	9
4	f	0	24	5	1.57611		GE1	4	400	5	Crus1	iCrus1	IntPosterior	4	8
4	f	0	24	6	160.727		GE1	4	400	5	Sim	iSim	IntPosterior	4	7
4	f	0	24	7			GE1	4	400	5	4/5	i4/5		#N/A	12
4	f	0	24	8	25.871		GE1	4	400	12	2	m2	MedAnterior	5	13
4	f	0	24	9	79.5986		GE1	4	400	12	2	m2	MedAnterior	5	13
4	f	0	24	10	90.3922		GE1	4	400	12	3	m3	MedAnterior	5	14
4	f	0	24	11	134.148		GE1	4	400	12	3	m3	MedAnterior	5	14
4	f	0	24	12	83.5002		GE1	4	400	12	3	m3	MedAnterior	5	14
4	f	0	24	13	60.8264		GE1	4	400	12	4/5	m4/5	MedAnterior	5	15
4	f	0	24	14	162.075		GE1	4	400	12	4/5	m4/5	MedAnterior	5	15
4	f	0	24	15	70.7517		GE1	4	400	12	4/5	m4/5	MedAnterior	5	15
4	f	0	24	16	109.347		GE1	4	400	12	6	m6	MedPosterior	6	16
4	f	0	24	17			GE1	4	400	12				#N/A	#N/A
4	f	0	24	18	81.6414		GE1	4	400	12	7	m7	MedPosterior	6	17
4	f	0	24	19	119.864		GE1	4	400	12	8	m8	MedPosterior	6	18
4	f	0	24	20	144.577		GE1	4	400	12	8	m8	MedPosterior	6	18
4	f	0	24	21	165.098		GE1	4	400	12	9	m9	MedPosterior	6	19
4	f	0	24	22	160.676		GE1	4	400	12	9	m9	MedPosterior	6	19
4	f	0	24	23	30.8823		GE1	4	400	12	10	m10	MedPosterior	6	20
4	f	0	24	24	12.7217		GE1	4	400	12	10	m10	MedPosterior	6	20
4	f	0	25	200103a_1001	17.4538		GE1	4	400	3	PFl	LPFl	Vestibular	1	1
4	f	0	25	2	75.5659		GE1	4	400	3	PFl	LPFl	Vestibular	1	1
4	f	0	25	3	33.9609		GE1	4	400	3	Crus2	LCrus2	Lateral	2	5
4	f	0	25	4	30.8428		GE1	4	400	3	Crus1	LCrus1	Lateral	2	4
4	f	0	25	5	5.35583		GE1	4	400	6	cop	icop	IntPosterior	4	11
4	f	0	25	6	38.8201		GE1	4	400	6	PM	iPM	IntPosterior	4	10
4	f	0	25	7			GE1	4	400	6	Crus1	iCrus1		#N/A	8
4	f	0	25	8	28.7534		GE1	4	400	6	Crus2	iCrus2	IntPosterior	4	9
4	f	0	25	9	13.54		GE1	4	400	6	4/5	i4/5	IntAnterior	3	12
4	f	0	25	10	69.4711		GE1	4	400	12	2	m2	MedAnterior	5	13
4	f	0	25	11	39.8935		GE1	4	400	12	2	m2	MedAnterior	5	13
4	f	0	25	12	75.4631		GE1	4	400	12	3	m3	MedAnterior	5	14
4	f	0	25	13	53.864		GE1	4	400	12	3	m3	MedAnterior	5	14
4	f	0	25	14	87.6118		GE1	4	400	12	3	m3	MedAnterior	5	14
4	f	0	25	15	66.9134		GE1	4	400	12	4/5	m4/5	MedAnterior	5	15
4	f	0	25	16	139.041		GE1	4	400	12	4/5	m4/5	MedAnterior	5	15
4	f	0	25	17	86.8105		GE1	4	400	12	4/5	m4/5	MedAnterior	5	15
4	f	0	25	18	35.7373		GE1	4	400	12	6	m6	MedPosterior	6	16
4	f	0	25	19	17.5708		GE1	4	400	12	6	m6	MedPosterior	6	16
4	f	0	25	20			GE1	4	400	12	8	m8		#N/A	18
4	f	0	25	21	33.7496		GE1	4	400	12	9	m9	MedPosterior	6	19
4	f	0	25	22	56.5326		GE1	4	400	12	9	m9	MedPosterior	6	19
4	f	0	25	23	60.1976		GE1	4	400	12	9	m9	MedPosterior	6	19
4	f	0	25	24	18.9783		GE1	4	400	12	10	m10	MedPosterior	6	20
4	f	0	25	25	21.9262		GE1	4	400	12	10	m10	MedPosterior	6	20
4	f	0	26	200105b_1003	41.1496		GE1	4	400	3	PFl	LPFl	Vestibular	1	1
4	f	0	26	2	92.3575		GE1	4	400	3	Fl	LFl	Vestibular	1	2
4	f	0	26	3	38.7821		GE1	4	400	3	Crus2	LCrus2	Lateral	2	5
4	f	0	26	4	38.7692		GE1	4	400	3	crus1	Lcrus1	Lateral	2	4
4	f	0	26	5			GE1	4	400	6	cop	icop		#N/A	11
4	f	0	26	6	71.9728		GE1	4	400	6	crus2	icrus2	IntPosterior	4	9
4	f	0	26	7	66.3317		GE1	4	400	6	crus1	icrus1	IntPosterior	4	8
4	f	0	26	8			GE1	4	400	6	4/5	i4/5	IntAnterior	3	12
4	f	0	26	9	68.7971		GE1	4	400	12	2	m2	MedAnterior	5	13
4	f	0	26	10	42.4333		GE1	4	400	12	2	m2	MedAnterior	5	13
4	f	0	26	11	58.9185		GE1	4	400	12	3	m3	MedAnterior	5	14
4	f	0	26	12	73.9763		GE1	4	400	12	3	m3	MedAnterior	5	14
4	f	0	26	13	91.478		GE1	4	400	12	4/5	m4/5	MedAnterior	5	15
4	f	0	26	14	100.303		GE1	4	400	12	4/5	m4/5	MedAnterior	5	15
4	f	0	26	15	149.122		GE1	4	400	12	4/5	m4/5	MedAnterior	5	15
4	f	0	26	16	93.2674		GE1	4	400	12	6	m6	MedPosterior	6	16
4	f	0	26	17	109.803		GE1	4	400	12	6	m6	MedPosterior	6	16
4	f	0	26	18	80.2683		GE1	4	400	12	8	m8	MedPosterior	6	18
4	f	0	26	19	74.4982		GE1	4	400	12	9	m9	MedPosterior	6	19
4	f	0	26	20	41.7846		GE1	4	400	12	10	m10	MedPosterior	6	20
4	f	0	26	21	21.5147		GE1	4	400	12	10	m10	MedPosterior	6	20
4	f	0	27	200109_1024	22.7324		GE1	4	400	3	PFl	LPFl	Vestibular	1	1
4	f	0	27	2	93.5115		GE1	4	400	3	PM	LPM	Lateral	2	6
4	f	0	27	3	119.169		GE1	4	400	3	Crus2	LCrus2	Lateral	2	5
4	f	0	27	4	30.7565		GE1	4	400	3	crus1	Lcrus1	Lateral	2	4
4	f	0	27	5			GE1	4	400	3	Sim	LSim		#N/A	3
4	f	0	27	6			GE1	4	400	6	4/5	i4/5		#N/A	12
4	f	0	27	7	85.3139		GE1	4	400	6	sim	isim	IntPosterior	4	7
4	f	0	27	8			GE1	4	400	6				#N/A	#N/A
4	f	0	27	9	28.1532		GE1	4	400	6	pm	ipm	IntPosterior	4	10
4	f	0	27	10	75.6405		GE1	4	400	12	2	m2	MedAnterior	5	13
4	f	0	27	11	69.2115		GE1	4	400	12	2	m2	MedAnterior	5	13
4	f	0	27	12	38.4211		GE1	4	400	12	3	m3	MedAnterior	5	14
4	f	0	27	13	83.1979		GE1	4	400	12	3	m3	MedAnterior	5	14
4	f	0	27	14	67.6652		GE1	4	400	12	4/5	m4/5	MedAnterior	5	15
4	f	0	27	15	73.1845		GE1	4	400	12	4/5	m4/5	MedAnterior	5	15
4	f	0	27	16	97.4671		GE1	4	400	12	4/5	m4/5	MedAnterior	5	15
4	f	0	27	17	82.7178		GE1	4	400	12	6	m6	MedPosterior	6	16
4	f	0	27	18	121.697		GE1	4	400	12	6	m6	MedPosterior	6	16
4	f	0	27	19	49.8249		GE1	4	400	12	8	m8	MedPosterior	6	18
4	f	0	27	20	69.7989		GE1	4	400	12	8	m8	MedPosterior	6	18
4	f	0	27	21	103.97		GE1	4	400	12	9	m9	MedPosterior	6	19
4	f	0	27	22	41.5444		GE1	4	400	12	9	m9	MedPosterior	6	19
4	f	0	27	23	102.805		GE1	4	400	12	9	m9	MedPosterior	6	19
4	f	0	27	24	40.7025		GE1	4	400	12	10	m10	MedPosterior	6	20
4	f	0	27	25	42.5814		GE1	4	400	12	10	m10	MedPosterior	6	20
4	m	1	28	200114_1104	37.2847		GE1	4	400	3	Fl	LFl	Vestibular	1	2
4	m	1	28	2	15.7871		GE1	4	400	3	Fl	LFl	Vestibular	1	2
4	m	1	28	3			GE1	4	400	3	PFl	LPFl		#N/A	1
4	m	1	28	4	72.7196		GE1	4	400	3	crus1	Lcrus1	Lateral	2	4
4	m	1	28	5			GE1	4	400	3				#N/A	#N/A
4	m	1	28	6	81.9634		GE1	4	400	3	crus2	Lcrus2	Lateral	2	5
4	m	1	28	7	55.3278		GE1	4	400	6	sim	isim	IntPosterior	4	7
4	m	1	28	8	44.7599		GE1	4	400	6	crus1	icrus1	IntPosterior	4	8
4	m	1	28	9	70.3687		GE1	4	400	6	crus2	icrus2	IntPosterior	4	9
4	m	1	28	10	88.8762		GE1	4	400	6	PM	iPM	IntPosterior	4	10
4	m	1	28	11	53.2986		GE1	4	400	12	2	m2	MedAnterior	5	13
4	m	1	28	12	99.6269		GE1	4	400	12	2	m2	MedAnterior	5	13
4	m	1	28	13	64.6336		GE1	4	400	12	3	m3	MedAnterior	5	14
4	m	1	28	14	130.07		GE1	4	400	12	3	m3	MedAnterior	5	14
4	m	1	28	15	57.3822		GE1	4	400	12	3	m3	MedAnterior	5	14
4	m	1	28	16	46.2895		GE1	4	400	12	4/5	m4/5	MedAnterior	5	15
4	m	1	28	17	74.7342		GE1	4	400	12	4/5	m4/5	MedAnterior	5	15
4	m	1	28	18	77.3606		GE1	4	400	12	4/5	m4/5	MedAnterior	5	15
4	m	1	28	19	84.2482		GE1	4	400	12	6	m6	MedPosterior	6	16
4	m	1	28	20	8.05997		GE1	4	400	12	6	m6	MedPosterior	6	16
4	m	1	28	21	52.048		GE1	4	400	12	7	m7	MedPosterior	6	17
4	m	1	28	22	47.0982		GE1	4	400	12	8	m8	MedPosterior	6	18
4	m	1	28	23	46.5685		GE1	4	400	12	8	m8	MedPosterior	6	18
4	m	1	28	24	44.9146		GE1	4	400	12	9	m9	MedPosterior	6	19
4	m	1	28	25	63.6344		GE1	4	400	12	9	m9	MedPosterior	6	19
4	m	1	28	26	29.5794		GE1	4	400	12	9	m9	MedPosterior	6	19
4	m	1	28	27	16.7199		GE1	4	400	12	10	m10	MedPosterior	6	20
4	m	1	28	28	20.0568		GE1	4	400	12	10	m10	MedPosterior	6	20
4	m	1	29	200115a_1049	35.9572		GE1	4	400	2	Fl	LFl	Vestibular	1	2
4	m	1	29	2	75.032		GE1	4	400	3	crus1	Lcrus1	Lateral	2	4
4	m	1	29	3	92.6364		GE1	4	400	3	crus2	Lcrus2	Lateral	2	5
4	m	1	29	4	74.9772		GE1	4	400	6	4/5	i4/5	IntAnterior	3	12
4	m	1	29	5	32.9792		GE1	4	400	6	crus1	icrus1	IntPosterior	4	8
4	m	1	29	6	121.343		GE1	4	400	6	crus2	icrus2	IntPosterior	4	9
4	m	1	29	7	59.8463		GE1	4	400	6	PM	iPM	IntPosterior	4	10
4	m	1	29	8	32.5285		GE1	4	400	6	cop	icop	IntPosterior	4	11
4	m	1	29	9	93.4667		GE1	4	400	12	2	m2	MedAnterior	5	13
4	m	1	29	10	75.8916		GE1	4	400	12	2	m2	MedAnterior	5	13
4	m	1	29	11	79.8197		GE1	4	400	12	3	m3	MedAnterior	5	14
4	m	1	29	12	88.0949		GE1	4	400	12	3	m3	MedAnterior	5	14
4	m	1	29	13	108.116		GE1	4	400	12	4/5	m4/5	MedAnterior	5	15
4	m	1	29	14	121.178		GE1	4	400	12	4/5	m4/5	MedAnterior	5	15
4	m	1	29	15	43.4336		GE1	4	400	12	6	m6	MedPosterior	6	16
4	m	1	29	16			GE1	4	400	12	6	m6	MedPosterior	6	16
4	m	1	29	17	52.5356		GE1	4	400	12	7	m7	MedPosterior	6	17
4	m	1	29	18	30.028		GE1	4	400	12	8	m8	MedPosterior	6	18
4	m	1	29	19	86.9281		GE1	4	400	12	9	m9	MedPosterior	6	19
4	m	1	29	20	29.0067		GE1	4	400	12	9	m9	MedPosterior	6	19
4	m	1	29	21	45.3311		GE1	4	400	12	9	m9	MedPosterior	6	19
4	m	1	29	22	50.6749		GE1	4	400	12	10	m10	MedPosterior	6	20
4	m	1	29	23	28.807		GE1	4	400	12	10	m10	MedPosterior	6	20
4	m	1	30	200116_1069			GE1	4	400	3	Fl	LFl	Vestibular	1	2
4	m	1	30	2	28.0254		GE1	4	400	3	PFl	LPFl	Vestibular	1	1
4	m	1	30	3			GE1	4	400	3	PM	LPM		#N/A	6
4	m	1	30	4	81.3821		GE1	4	400	3	Crus2	LCrus2	Lateral	2	5
4	m	1	30	5	155.505		GE1	4	400	3	sim	Lsim	Lateral	2	3
4	m	1	30	6	107.618		GE1	4	400	3	sim	Lsim	Lateral	2	3
4	m	1	30	7	92.609		GE1	4	400	6	4/5	i4/5	IntAnterior	3	12
4	m	1	30	8	84.9791		GE1	4	400	6	sim	isim	IntPosterior	4	7
4	m	1	30	9	57.5854		GE1	4	400	6	crus1	icrus1	IntPosterior	4	8
4	m	1	30	10			GE1	4	400	6	PM	iPM		#N/A	10
4	m	1	30	11	44.7253		GE1	4	400	12	10	m10	MedPosterior	6	20
4	m	1	30	12	40.7566		GE1	4	400	12	9	m9	MedPosterior	6	19
4	m	1	30	13	45.3867		GE1	4	400	12	9	m9	MedPosterior	6	19
4	m	1	30	14	41.7601		GE1	4	400	12	9	m9	MedPosterior	6	19
4	m	1	30	15	92.3827		GE1	4	400	12	8	m8	MedPosterior	6	18
4	m	1	30	16	53.0335		GE1	4	400	12	6	m6	MedPosterior	6	16
4	m	1	30	17	65.5106		GE1	4	400	12	6	m6	MedPosterior	6	16
4	m	1	30	18	49.7454		GE1	4	400	12	4/5	m4/5	MedAnterior	5	15
4	m	1	30	19	123.302		GE1	4	400	12	4/5	m4/5	MedAnterior	5	15
4	m	1	30	20	51.2929		GE1	4	400	12	4/5	m4/5	MedAnterior	5	15
4	m	1	30	21	92.6991		GE1	4	400	12	3	m3	MedAnterior	5	14
4	m	1	30	22	67.1814		GE1	4	400	12	3	m3	MedAnterior	5	14
4	m	1	30	23	92.5617		GE1	4	400	12	2	m2	MedAnterior	5	13
4	m	1	30	24	67.3515		GE1	4	400	12	2	m2	MedAnterior	5	13

## Sheet: AtmN Wt; Aptx- -
AtmN/Wt; Aptx-/-			Total # of animals	10
Genotype	sex	sex code (1=m)	sex code (1=m)	Exp. Date_Animal ID	Average frequency	Average frequency	Group	Age	Age days	slice	folia	Position name	Region name	Gross Region ID	Position ID								1-5 vs 6-10
5	m	1	1	191119_1665	9.19015		GE4	3	210	3	crus1	Lcrus1	Lateral	2	4		All time points												m					f
5	m	1	1	2	41.8605		GE4	3	210	3	crus2	Lcrus2	Lateral	2	5		By Position ID	average	stdev	n	sem		By major regions	average	stdev	n	sem		average	stdev	n	sem		average	stdev	n	sem
5	m	1	1	3	103.113		GE4	3	210	3	crus2	Lcrus2	Lateral	2	5		Lpfl	57.8994	66.75	4	33.375	1	Vestibular	48.3604	43.5884	11	13.1424	1	49.9884	50.6258	7	19.1348		57.6016	37.0036	4	18.5018
5	m	1	1	4	50.447		GE4	3	210	6	cop	icop	IntPosterior	4	11		Lfl	49.8182	31.5929	7	11.941	2	Lateral	51.1207	53.9928	23	11.2583	2	69.2373	53.2163	15	13.7404		68.2726	57.9763	8	20.4977
5	m	1	1	5	70.8178		GE4	3	210	6	crus2	icrus2	IntPosterior	4	9		Lsim	52.2534	44.8452	7	16.9499	3	IntAnterior	61.1346	55.5302	5	24.8339	3	89.7301	62.2098	3	35.9168		48.8087	57.8971	2	40.9394
5	m	1	1	6	132.55		GE4	3	210	6	crus1	icrus1	IntPosterior	4	8		Lcrus1	64.5283	59.0693	8	20.8841	4	IntPosterior	51.8366	40.0833	24	8.18196	4	62.9887	40.7282	19	9.3437		71.6625	33.2566	5	14.8728
5	m	1	1	7	60.4066		GE4	3	210	6	sim	isim	IntPosterior	4	7		Lcrus2	89.9615	56.0115	6	22.8666	5	MedAnterior	70.9364	30.919	79	3.47866	5	71.4751	27.4321	56	3.66577		75.7933	38.6283	23	8.05456
5	m	1	1	8			GE4	3	210	6	4/5	i4/5	IntAnterior	3	12		Lpm	81.4858	64.5788	2	45.6641	6	MedPosterior	60.4818	36.3675	79	4.09167	6	65.4328	36.413	58	4.78126		64.0881	37.0827	21	8.09212
5	m	1	1	9	23.9517		GE4	3	210	11	2	m2	MedAnterior	5	13		isim	69.9027	45.7007	6	18.6572	7
5	m	1	1	10	88.612		GE4	3	210	11	2	m2	MedAnterior	5	13		icrus1	83.735	49.1362	4	24.5681	8
5	m	1	1	11	51.9744		GE4	3	210	11	2	m2	MedAnterior	5	13		icrus2	65.1351	34.9451	3	20.1755	9
5	m	1	1	12	54.5237		GE4	3	210	11	2	m2	MedAnterior	5	13		ipm	57.6641	35.2387	8	12.4588	10
5	m	1	1	13	78.1203		GE4	3	210	11	2	m2	MedAnterior	5	13		icop	48.008	26.381	3	15.2311	11
5	m	1	1	14	67.5793		GE4	3	210	11	3	m3	MedAnterior	5	14		i4/5	73.3616	55.5302	5	24.8339	12
5	m	1	1	15	98.964		GE4	3	210	11	3	m3	MedAnterior	5	14		m2	65.8087	20.7914	27	4.00131	13
5	m	1	1	16	55.3479		GE4	3	210	11	4/5	m4/5	MedAnterior	5	15		m3	71.7781	26.2678	26	5.15154	14
5	m	1	1	17	69.6508		GE4	3	210	11	4/5	m4/5	MedAnterior	5	15		m4/5	80.8764	41.6225	26	8.16285	15
5	m	1	1	18	57.4372		GE4	3	210	11	4/5	m4/5	MedAnterior	5	15		m6	85.8278	36.1881	21	7.89688	16
5	m	1	1	19	146.515		GE4	3	210	11	6	m6	MedPosterior	6	16		m7	90.4524	51.8453	4	25.9226	17
5	m	1	1	20	73.8594		GE4	3	210	11	6	m6	MedPosterior	6	16		m8	74.5036	33.4707	17	8.11783	18
5	m	1	1	21	87.5305		GE4	3	210	11	8	m8	MedPosterior	6	18		m9	59.0587	31.6036	19	7.25036	19
5	m	1	1	22	51.0779		GE4	3	210	11	8	m8	MedPosterior	6	18		m10	32.6713	13.5578	18	3.19561	20
5	m	1	1	23	100.348		GE4	3	210	11	9	m9	MedPosterior	6	19
5	m	1	1	24	69.7792		GE4	3	210	11	9	m9	MedPosterior	6	19
5	m	1	1	25	26.3185		GE4	3	210	11	10	m10	MedPosterior	6	20
5	m	1	1	26	34.3745		GE4	3	210	11	10	m10	MedPosterior	6	20
5	m	1	2	191126_861	22.5349		GE1	4	400	3	fl	Lfl	Vestibular	1	2
5	m	1	2	2	22.6332		GE1	4	400	3	fl	Lfl	Vestibular	1	2
5	m	1	2	3	156.665		GE1	4	400	3	pfl	Lpfl	Vestibular	1	1
5	m	1	2	4	60.0243		GE1	4	400	6	cop	icop	IntPosterior	4	11
5	m	1	2	5	35.5808		GE1	4	400	6	pm	ipm	IntPosterior	4	10
5	m	1	2	6	45.4761		GE1	4	400	11	2	m2	MedAnterior	5	13
5	m	1	2	7	60.2537		GE1	4	400	11	2	m2	MedAnterior	5	13
5	m	1	2	8	50.1675		GE1	4	400	11	2	m2	MedAnterior	5	13
5	m	1	2	9	36.9991		GE1	4	400	11	3	m3	MedAnterior	5	14
5	m	1	2	10	63.5352		GE1	4	400	11	3	m3	MedAnterior	5	14
5	m	1	2	11	44.4863		GE1	4	400	11	3	m3	MedAnterior	5	14
5	m	1	2	12	47.0463		GE1	4	400	11	4/5	m4/5	MedAnterior	5	15
5	m	1	2	13	66.1976		GE1	4	400	11	4/5	m4/5	MedAnterior	5	15
5	m	1	2	14	85.3424		GE1	4	400	11	4/5	m4/5	MedAnterior	5	15
5	m	1	2	15	88.9155		GE1	4	400	11	6	m6	MedPosterior	6	16		GE2	45 days											m					f
5	m	1	2	16	74.1264		GE1	4	400	11	6	m6	MedPosterior	6	16		By Position ID	average	stdev	n	sem		By major regions	average	stdev	n	sem		average	stdev	n	sem		average	stdev	n	sem
5	m	1	2	17	47.7686		GE1	4	400	11	8	m8	MedPosterior	6	18		Lpfl	#DIV/0!	#DIV/0!	0	#DIV/0!		Vestibular	#DIV/0!	#DIV/0!	0	#DIV/0!		#DIV/0!	#DIV/0!	0	#DIV/0!		#DIV/0!	#DIV/0!	0	#DIV/0!
5	m	1	2	18	52.0688		GE1	4	400	11	8	m8	MedPosterior	6	18		Lfl	#DIV/0!	#DIV/0!	0	#DIV/0!		Lateral	#DIV/0!	#DIV/0!	0	#DIV/0!		#DIV/0!	#DIV/0!	0	#DIV/0!		#DIV/0!	#DIV/0!	0	#DIV/0!
5	m	1	2	19	66.1312		GE1	4	400	11	9	m9	MedPosterior	6	19		Lsim	#DIV/0!	#DIV/0!	0	#DIV/0!		IntAnterior	#DIV/0!	#DIV/0!	0	#DIV/0!		#DIV/0!	#DIV/0!	0	#DIV/0!		#DIV/0!	#DIV/0!	0	#DIV/0!
5	m	1	2	20	42.8554		GE1	4	400	11	9	m9	MedPosterior	6	19		Lcrus1	#DIV/0!	#DIV/0!	0	#DIV/0!		IntPosterior	#DIV/0!	#DIV/0!	0	#DIV/0!		#DIV/0!	#DIV/0!	0	#DIV/0!		#DIV/0!	#DIV/0!	0	#DIV/0!
5	m	1	2	21	36.4096		GE1	4	400	11	10	m10	MedPosterior	6	20		Lcrus2	#DIV/0!	#DIV/0!	0	#DIV/0!		MedAnterior	#DIV/0!	#DIV/0!	0	#DIV/0!		#DIV/0!	#DIV/0!	0	#DIV/0!		#DIV/0!	#DIV/0!	0	#DIV/0!
5	m	1	2	22	31.7827		GE1	4	400	11	10	m10	MedPosterior	6	20		Lpm	#DIV/0!	#DIV/0!	0	#DIV/0!		MedPosterior	#DIV/0!	#DIV/0!	0	#DIV/0!		#DIV/0!	#DIV/0!	0	#DIV/0!		#DIV/0!	#DIV/0!	0	#DIV/0!
5	m	1	3	191127_862	39.5081		GE1	4	400	2	pfl	Lpfl	Vestibular	1	1		isim	#DIV/0!	#DIV/0!	0	#DIV/0!
5	m	1	3	2			GE1	4	400	2	crus1	Lcrus1	Lateral	2	4		icrus1	#DIV/0!	#DIV/0!	0	#DIV/0!
5	m	1	3	3	18.5649		GE1	4	400	6	pm	ipm	IntPosterior	4	10		icrus2	#DIV/0!	#DIV/0!	0	#DIV/0!
5	m	1	3	4			GE1	4	400	6	crus2	icrus2	IntPosterior	4	9		ipm	#DIV/0!	#DIV/0!	0	#DIV/0!
5	m	1	3	5	125.585		GE1	4	400	6	sim	isim	IntPosterior	4	7		icop	#DIV/0!	#DIV/0!	0	#DIV/0!
5	m	1	3	6	59.7981		GE1	4	400	12	2	m2	MedAnterior	5	13		i4/5	#DIV/0!	#DIV/0!	0	#DIV/0!
5	m	1	3	7	42.0883		GE1	4	400	12	2	m2	MedAnterior	5	13		m2	#DIV/0!	#DIV/0!	0	#DIV/0!
5	m	1	3	8	61.0959		GE1	4	400	12	3	m3	MedAnterior	5	14		m3	#DIV/0!	#DIV/0!	0	#DIV/0!
5	m	1	3	9	116.133		GE1	4	400	12	3	m3	MedAnterior	5	14		m4/5	#DIV/0!	#DIV/0!	0	#DIV/0!
5	m	1	3	10	80.3206		GE1	4	400	12	3	m3	MedAnterior	5	14		m6	#DIV/0!	#DIV/0!	0	#DIV/0!
5	m	1	3	11	80.1066		GE1	4	400	12	4/5	m4/5	MedAnterior	5	15		m7	#DIV/0!	#DIV/0!	0	#DIV/0!
5	m	1	3	12	84.1456		GE1	4	400	12	4/5	m4/5	MedAnterior	5	15		m8	#DIV/0!	#DIV/0!	0	#DIV/0!
5	m	1	3	13	79.7924		GE1	4	400	12	6	m6	MedPosterior	6	16		m9	#DIV/0!	#DIV/0!	0	#DIV/0!
5	m	1	3	14	14.1954		GE1	4	400	12	6	m6	MedPosterior	6	16		m10	#DIV/0!	#DIV/0!	0	#DIV/0!
5	m	1	3	15	90.9577		GE1	4	400	12	6	m6	MedPosterior	6	16
5	m	1	3	16			GE1	4	400	12	7	m7	MedPosterior	6	17
5	m	1	3	17	65.6118		GE1	4	400	12	8	m8	MedPosterior	6	18
5	m	1	3	18			GE1	4	400	12	9	m9	MedPosterior	6	19
5	m	1	3	19	49.0484		GE1	4	400	12	9	m9	MedPosterior	6	19
5	m	1	3	20	32.8189		GE1	4	400	12	10	m10	MedPosterior	6	20
5	m	1	3	21	31.3704		GE1	4	400	12	10	m10	MedPosterior	6	20
5	m	1	4	191209_896	70.7465		GE1	4	400	3	Fl	LFl	Vestibular	1	2
5	m	1	4	2	52.1435		GE1	4	400	3	Crus2	LCrus2	Lateral	2	5
5	m	1	4	3	3.62735		GE1	4	400	3	crus1	Lcrus1	Lateral	2	4
5	m	1	4	4	27.8758		GE1	4	400	3	sim	Lsim	Lateral	2	3
5	m	1	4	5	60.1624		GE1	4	400	6	4/5	i4/5	IntAnterior	3	12
5	m	1	4	6	22.1989		GE1	4	400	6	sim	isim	IntPosterior	4	7
5	m	1	4	7	60.6346		GE1	4	400	6	Crus2	iCrus2	IntPosterior	4	9
5	m	1	4	8			GE1	4	400	6	cop	icop	IntPosterior	4	11
5	m	1	4	9	18.9067		GE1	4	400	12	10	m10	MedPosterior	6	20
5	m	1	4	10	31.7143		GE1	4	400	12	10	m10	MedPosterior	6	20
5	m	1	4	11	54.1687		GE1	4	400	12	9	m9	MedPosterior	6	19
5	m	1	4	12	41.9641		GE1	4	400	12	9	m9	MedPosterior	6	19
5	m	1	4	13	81.8177		GE1	4	400	12	8	m8	MedPosterior	6	18		GE3	110 days											m	N	0			f	N	0
5	m	1	4	14	27.8628		GE1	4	400	12	8	m8	MedPosterior	6	18		By Position ID	average	stdev	n	sem		By major regions	average	stdev	n	sem		average	stdev	n	sem		average	stdev	n	sem
5	m	1	4	15	50.8738		GE1	4	400	12	8	m8	MedPosterior	6	18		Lpfl	#DIV/0!	#DIV/0!	0	#DIV/0!		Vestibular	#DIV/0!	#DIV/0!	0	#DIV/0!		#DIV/0!	#DIV/0!	0	#DIV/0!		#DIV/0!	#DIV/0!	0	#DIV/0!
5	m	1	4	16	95.7807		GE1	4	400	12	6	m6	MedPosterior	6	16		Lfl	#DIV/0!	#DIV/0!	0	#DIV/0!		Lateral	#DIV/0!	#DIV/0!	0	#DIV/0!		#DIV/0!	#DIV/0!	0	#DIV/0!		#DIV/0!	#DIV/0!	0	#DIV/0!
5	m	1	4	17	79.0155		GE1	4	400	12	6	m6	MedPosterior	6	16		Lsim	#DIV/0!	#DIV/0!	0	#DIV/0!		IntAnterior	#DIV/0!	#DIV/0!	0	#DIV/0!		#DIV/0!	#DIV/0!	0	#DIV/0!		#DIV/0!	#DIV/0!	0	#DIV/0!
5	m	1	4	18	112.102		GE1	4	400	12	4/5	m4/5	MedAnterior	5	15		Lcrus1	#DIV/0!	#DIV/0!	0	#DIV/0!		IntPosterior	#DIV/0!	#DIV/0!	0	#DIV/0!		#DIV/0!	#DIV/0!	0	#DIV/0!		#DIV/0!	#DIV/0!	0	#DIV/0!
5	m	1	4	19	100.13		GE1	4	400	12	4/5	m4/5	MedAnterior	5	15		Lcrus2	#DIV/0!	#DIV/0!	0	#DIV/0!		MedAnterior	#DIV/0!	#DIV/0!	0	#DIV/0!		#DIV/0!	#DIV/0!	0	#DIV/0!		#DIV/0!	#DIV/0!	0	#DIV/0!
5	m	1	4	20	48.3112		GE1	4	400	12	4/5	m4/5	MedAnterior	5	15		Lpm	#DIV/0!	#DIV/0!	0	#DIV/0!		MedPosterior	#DIV/0!	#DIV/0!	0	#DIV/0!		#DIV/0!	#DIV/0!	0	#DIV/0!		#DIV/0!	#DIV/0!	0	#DIV/0!
5	m	1	4	21	63.2595		GE1	4	400	12	3	m3	MedAnterior	5	14		isim	#DIV/0!	#DIV/0!	0	#DIV/0!
5	m	1	4	22			GE1	4	400	12				#N/A	#N/A		icrus1	#DIV/0!	#DIV/0!	0	#DIV/0!
5	m	1	4	23	24.7203		GE1	4	400	12	3	m3	MedAnterior	5	14		icrus2	#DIV/0!	#DIV/0!	0	#DIV/0!
5	m	1	4	24	73.3252		GE1	4	400	12	3	m3	MedAnterior	5	14		ipm	#DIV/0!	#DIV/0!	0	#DIV/0!
5	m	1	4	25	59.2416		GE1	4	400	12	2	m2	MedAnterior	5	13		icop	#DIV/0!	#DIV/0!	0	#DIV/0!
5	m	1	4	26	94.9168		GE1	4	400	12	2	m2	MedAnterior	5	13		i4/5	#DIV/0!	#DIV/0!	0	#DIV/0!
5	m	1	4	27	74.9571		GE1	4	400	12	2	m2	MedAnterior	5	13		m2	#DIV/0!	#DIV/0!	0	#DIV/0!
5	m	1	5	191211a_893	85.7721		GE1	4	400	3	sim	Lsim	Lateral	2	3		m3	#DIV/0!	#DIV/0!	0	#DIV/0!
5	m	1	5	2			GE1	4	400	3	Crus1	LCrus1	Lateral	2	4		m4/5	#DIV/0!	#DIV/0!	0	#DIV/0!
5	m	1	5	3	102.902		GE1	4	400	3	Crus1	LCrus1	Lateral	2	4		m6	#DIV/0!	#DIV/0!	0	#DIV/0!
5	m	1	5	4			GE1	4	400	3	Crus2	LCrus2	Lateral	2	5		m7	#DIV/0!	#DIV/0!	0	#DIV/0!
5	m	1	5	5			GE1	4	400	3	Crus2	LCrus2	Lateral	2	5		m8	#DIV/0!	#DIV/0!	0	#DIV/0!
5	m	1	5	6	150.667		GE1	4	400	6	4/5	i4/5	IntAnterior	3	12		m9	#DIV/0!	#DIV/0!	0	#DIV/0!
5	m	1	5	7	15.0125		GE1	4	400	6	sim	isim	IntPosterior	4	7		m10	#DIV/0!	#DIV/0!	0	#DIV/0!
5	m	1	5	8	53.5347		GE1	4	400	6	Crus1	iCrus1	IntPosterior	4	8
5	m	1	5	9			GE1	4	400	6	Crus2	iCrus2	IntPosterior	4	9
5	m	1	5	10	90.5152		GE1	4	400	6	PM	iPM	IntPosterior	4	10
5	m	1	5	11	33.5528		GE1	4	400	6	Cop	iCop	IntPosterior	4	11
5	m	1	5	12	20.0884		GE1	4	400	12	10	m10	MedPosterior	6	20
5	m	1	5	13	26.7445		GE1	4	400	12	10	m10	MedPosterior	6	20
5	m	1	5	14	42.7625		GE1	4	400	12	9	m9	MedPosterior	6	19
5	m	1	5	15	71.4677		GE1	4	400	12	9	m9	MedPosterior	6	19
5	m	1	5	16	37.1479		GE1	4	400	12	9	m9	MedPosterior	6	19
5	m	1	5	17	59.2429		GE1	4	400	12	8	m8	MedPosterior	6	18
5	m	1	5	18	86.6842		GE1	4	400	12	8	m8	MedPosterior	6	18
5	m	1	5	19	86.7885		GE1	4	400	12	7	m7	MedPosterior	6	17
5	m	1	5	20	84.0273		GE1	4	400	12	6	m6	MedPosterior	6	16
5	m	1	5	21	114.227		GE1	4	400	12	6	m6	MedPosterior	6	16
5	m	1	5	22	75.7366		GE1	4	400	12	4/5	m4/5	MedAnterior	5	15
5	m	1	5	23	31.0349		GE1	4	400	12	4/5	m4/5	MedAnterior	5	15
5	m	1	5	24	74.1525		GE1	4	400	12	4/5	m4/5	MedAnterior	5	15
5	m	1	5	25	77.6848		GE1	4	400	12	3	m3	MedAnterior	5	14
5	m	1	5	26	49.9318		GE1	4	400	12	3	m3	MedAnterior	5	14		GE4	220 days											m	N	1			f	N	0
5	m	1	5	27	77.2481		GE1	4	400	12	2	m2	MedAnterior	5	13		By Position ID	average	stdev	n	sem		By major regions	average	stdev	n	sem		average	stdev	n	sem		average	stdev	n	sem
5	m	1	5	28	58.7415		GE1	4	400	12	2	m2	MedAnterior	5	13		Lpfl	#DIV/0!	#DIV/0!	0	#DIV/0!		Vestibular	#DIV/0!	#DIV/0!	0	#DIV/0!		#DIV/0!	#DIV/0!	0	#DIV/0!		#DIV/0!	#DIV/0!	0	#DIV/0!
5	m	1	5	29	75.8133		GE1	4	400	12	2	m2	MedAnterior	5	13		Lfl	#DIV/0!	#DIV/0!	0	#DIV/0!		Lateral	51.3877	47.6805	3	27.5284		51.3877	47.6805	3	27.5284		#DIV/0!	#DIV/0!	0	#DIV/0!
5	m	1	5	30	70.2434		GE1	4	400	12	2	m2	MedAnterior	5	13		Lsim	#DIV/0!	#DIV/0!	0	#DIV/0!		IntAnterior	#DIV/0!	#DIV/0!	0	#DIV/0!		#DIV/0!	#DIV/0!	0	#DIV/0!		#DIV/0!	#DIV/0!	0	#DIV/0!
5	f	0	6	191211b_892	81.7662		GE1	4	400	3	Fl	LFl	Vestibular	1	2		Lcrus1	9.19015	#DIV/0!	1	#DIV/0!		IntPosterior	78.5554	36.9449	4	18.4725		78.5554	36.9449	4	18.4725		#DIV/0!	#DIV/0!	0	#DIV/0!
5	f	0	6	2			GE1	4	400	3	Fl	LFl	Vestibular	1	2		Lcrus2	72.4865	43.3118	2	30.626		MedAnterior	64.6161	21.147	10	6.68728		64.6161	21.147	10	6.68728		#DIV/0!	#DIV/0!	0	#DIV/0!
5	f	0	6	3	58.2		GE1	4	400	3	sim	Lsim	Lateral	2	3		Lpm	#DIV/0!	#DIV/0!	0	#DIV/0!		MedPosterior	73.7254	38.7705	8	13.7075		73.7254	38.7705	8	13.7075		#DIV/0!	#DIV/0!	0	#DIV/0!
5	f	0	6	4	6.13429		GE1	4	400	3	sim	Lsim	Lateral	2	3		isim	60.4066	#DIV/0!	1	#DIV/0!
5	f	0	6	5			GE1	4	400	3	crus1	Lcrus1	Lateral	2	4		icrus1	132.55	#DIV/0!	1	#DIV/0!
5	f	0	6	6			GE1	4	400	3	crus1	Lcrus1	Lateral	2	4		icrus2	70.8178	#DIV/0!	1	#DIV/0!
5	f	0	6	7	143.39		GE1	4	400	3	Crus2	LCrus2	Lateral	2	5		ipm	#DIV/0!	#DIV/0!	0	#DIV/0!
5	f	0	6	8	35.8217		GE1	4	400	3	PM	LPM	Lateral	2	6		icop	50.447	#DIV/0!	1	#DIV/0!
5	f	0	6	9	84.458		GE1	4	400	6	sim	isim	IntPosterior	4	7		i4/5	#DIV/0!	#DIV/0!	0	#DIV/0!
5	f	0	6	10	63.953		GE1	4	400	6	Crus2	iCrus2	IntPosterior	4	9		m2	59.4364	25.1957	5	11.2678
5	f	0	6	11	21.0299		GE1	4	400	6	PM	iPM	IntPosterior	4	10		m3	83.2717	22.1924	2	15.6924
5	f	0	6	12	35.6685		GE1	4	400	12	2	m2	MedAnterior	5	13		m4/5	60.812	7.72561	3	4.46038
5	f	0	6	13	56.1242		GE1	4	400	12	2	m2	MedAnterior	5	13		m6	110.187	51.3753	2	36.3279
5	f	0	6	14	94.2075		GE1	4	400	12	3	m3	MedAnterior	5	14		m7	#DIV/0!	#DIV/0!	0	#DIV/0!
5	f	0	6	15	93.815		GE1	4	400	12	3	m3	MedAnterior	5	14		m8	69.3042	25.7759	2	18.2263
5	f	0	6	16	46.3297		GE1	4	400	12	4/5	m4/5	MedAnterior	5	15		m9	85.0635	21.6152	2	15.2843
5	f	0	6	17	58.4361		GE1	4	400	12	4/5	m4/5	MedAnterior	5	15		m10	30.3465	5.69646	2	4.028
5	f	0	6	18	46.221		GE1	4	400	12	4/5	m4/5	MedAnterior	5	15
5	f	0	6	19	50.5332		GE1	4	400	12	6	m6	MedPosterior	6	16
5	f	0	6	20	62.6487		GE1	4	400	12	6	m6	MedPosterior	6	16
5	f	0	6	21	116.921		GE1	4	400	12	7	m7	MedPosterior	6	17
5	f	0	6	22	71.5045		GE1	4	400	12	8	m8	MedPosterior	6	18
5	f	0	6	23	111.995		GE1	4	400	12	8	m8	MedPosterior	6	18
5	f	0	6	24	68.7835		GE1	4	400	12	9	m9	MedPosterior	6	19
5	f	0	6	25	12.4888		GE1	4	400	12	9	m9	MedPosterior	6	19
5	f	0	6	26	24.906		GE1	4	400	12	10	m10	MedPosterior	6	20
5	f	0	6	27			GE1	4	400	12	10	m10	MedPosterior	6	20
5	m	1	7	191218b_941	15.4379		GE1	4	400	3	Fl	LFl	Vestibular	1	2
5	m	1	7	2	22.3931		GE1	4	400	3	pfl	Lpfl	Vestibular	1	1
5	m	1	7	3	130.886		GE1	4	400	3	Crus2	LCrus2	Lateral	2	5
5	m	1	7	4	68.3764		GE1	4	400	3	Crus2	LCrus2	Lateral	2	5
5	m	1	7	5			GE1	4	400	3	crus2	Lcrus2	Lateral	2	5
5	m	1	7	6	171.792		GE1	4	400	3	Crus1	LCrus1	Lateral	2	4
5	m	1	7	7	85.1991		GE1	4	400	3	crus1	Lcrus1	Lateral	2	4
5	m	1	7	8	58.3611		GE1	4	400	6	4/5	i4/5	IntAnterior	3	12
5	m	1	7	9	57.3983		GE1	4	400	6	Crus1	iCrus1	IntPosterior	4	8
5	m	1	7	10			GE1	4	400	6	crus1	icrus1	IntPosterior	4	8		GE1	400 days	N	9									m	N	6			f	N	3
5	m	1	7	11			GE1	4	400	6	Crus2	iCrus2	IntPosterior	4	9		By Position ID	average	stdev	n	sem		By major regions	average	stdev	n	sem		average	stdev	n	sem		average	stdev	n	sem
5	m	1	7	12	77.3399		GE1	4	400	6	pm	ipm	IntPosterior	4	10		Lpfl	57.8994	66.75	4	33.375		Vestibular	52.7568	43.5884	11	13.1424		49.9884	50.6258	7	19.1348		57.6016	37.0036	4	18.5018
5	m	1	7	13			GE1	4	400	6				#N/A	#N/A		Lfl	49.8182	31.5929	7	11.941		Lateral	71.5289	55.4142	20	12.391		73.6997	55.4863	12	16.0175		68.2726	57.9763	8	20.4977
5	m	1	7	14	100.259		GE1	4	400	12	2	m2	MedAnterior	5	13		Lsim	52.2534	44.8452	7	16.9499		IntAnterior	73.3616	52.2807	5	23.3806		89.7301	52.7804	3	30.4728		48.8087	57.8971	2	40.9394
5	m	1	7	15	81.2419		GE1	4	400	12	2	m2	MedAnterior	5	13		Lcrus1	72.4337	60.9479	7	23.0361		IntPosterior	62.0438	39.5998	20	8.85479		58.8376	39.5176	15	10.2034		71.6625	33.2566	5	14.8728
5	m	1	7	16	71.9974		GE1	4	400	12	3	m3	MedAnterior	5	14		Lcrus2	98.699	61.671	4	30.8355		MedAnterior	73.9085	32.0709	69	3.86089		72.9662	28.6711	46	4.22733		75.7933	38.6283	23	8.05456
5	m	1	7	17	84.7651		GE1	4	400	12	3	m3	MedAnterior	5	14		Lpm	81.4858	64.5788	2	45.6641		MedPosterior	64.1007	36.0969	71	4.28392		64.106	36.0086	50	5.09239		64.0881	37.0827	21	8.09212
5	m	1	7	18	70.752		GE1	4	400	12	3	m3	MedAnterior	5	14		isim	71.8019	50.8295	5	22.7316
5	m	1	7	19	154.231		GE1	4	400	12	4/5	m4/5	MedAnterior	5	15		icrus1	67.4632	37.7909	3	21.8186
5	m	1	7	20			GE1	4	400	12	4/5	m4/5	MedAnterior	5	15		icrus2	62.2938	32.1855	2	22.7586
5	m	1	7	21	123.144		GE1	4	400	12	6	m6	MedPosterior	6	16		ipm	57.6641	35.2387	8	12.4588
5	m	1	7	22			GE1	4	400	12	6	m6	MedPosterior	6	16		icop	46.7885	30.0817	2	21.2709
5	m	1	7	23	63.1664		GE1	4	400	12	6	m6	MedPosterior	6	16		i4/5	73.3616	52.2807	5	23.3806
5	m	1	7	24			GE1	4	400	12				#N/A	#N/A		m2	67.257	20.0605	22	4.27691
5	m	1	7	25			GE1	4	400	12	7	m7	MedPosterior	6	17		m3	70.8203	26.7608	24	5.46252
5	m	1	7	26	86.7819		GE1	4	400	12	8	m8	MedPosterior	6	18		m4/5	83.4935	43.7657	23	9.12578
5	m	1	7	27			GE1	4	400	12	8	m8	MedPosterior	6	18		m6	83.2637	34.8716	19	8.0001
5	m	1	7	28	78.1509		GE1	4	400	12	9	m9	MedPosterior	6	19		m7	90.4524	51.8453	4	25.9226
5	m	1	7	29	116.615		GE1	4	400	12	9	m9	MedPosterior	6	19		m8	75.1968	35.0028	15	9.03768
5	m	1	7	30	32.6192		GE1	4	400	12	9	m9	MedPosterior	6	19		m9	55.9993	31.2921	17	7.58944
5	m	1	7	31	62.8615		GE1	4	400	12	10	m10	MedPosterior	6	20		m10	32.9619	14.3078	16	3.57694
5	m	1	7	32	22.327		GE1	4	400	12	10	m10	MedPosterior	6	20
5	f	0	8	191229a_1005	63.109		GE1	4	400	3	Fl	LFl	Vestibular	1	2
5	f	0	8	2	72.4996		GE1	4	400	3	Fl	LFl	Vestibular	1	2
5	f	0	8	3	13.0315		GE1	4	400	3	PFl	LPFl	Vestibular	1	1
5	f	0	8	4	134.518		GE1	4	400	3	sim	Lsim	Lateral	2	3
5	f	0	8	5	33.934		GE1	4	400	3	sim	Lsim	Lateral	2	3
5	f	0	8	6			GE1	4	400	3	crus1	Lcrus1	Lateral	2	4
5	f	0	8	7	127.15		GE1	4	400	3	PM	LPM	Lateral	2	6
5	f	0	8	8	111.755		GE1	4	400	6	Sim	iSim	IntPosterior	4	7
5	f	0	8	9	77.1162		GE1	4	400	6	PM	iPM	IntPosterior	4	10
5	f	0	8	10	37.9917		GE1	4	400	11	2	m2	MedAnterior	5	13
5	f	0	8	11	103.719		GE1	4	400	11	2	m2	MedAnterior	5	13
5	f	0	8	12	22.3072		GE1	4	400	11	3	m3	MedAnterior	5	14
5	f	0	8	13	123.161		GE1	4	400	11	3	m3	MedAnterior	5	14
5	f	0	8	14	91.6772		GE1	4	400	11	3	m3	MedAnterior	5	14
5	f	0	8	15	46.6359		GE1	4	400	11	4/5	m4/5	MedAnterior	5	15
5	f	0	8	16	88.4689		GE1	4	400	11	4/5	m4/5	MedAnterior	5	15
5	f	0	8	17	139.584		GE1	4	400	11	4/5	m4/5	MedAnterior	5	15
5	f	0	8	18	142.794		GE1	4	400	11	6	m6	MedPosterior	6	16
5	f	0	8	19	81.7106		GE1	4	400	11	6	m6	MedPosterior	6	16
5	f	0	8	20	44.8946		GE1	4	400	11	6	m6	MedPosterior	6	16
5	f	0	8	21	83.3101		GE1	4	400	11	8	m8	MedPosterior	6	18
5	f	0	8	22	33.2561		GE1	4	400	11	9	m9	MedPosterior	6	19
5	f	0	8	23	53.7788		GE1	4	400	11	10	m10	MedPosterior	6	20
5	f	0	8	24	44.1353		GE1	4	400	11	10	m10	MedPosterior	6	20
5	f	0	9	200102a_1002	7.03289		GE1	4	400	3	Crus1	LCrus1	Lateral	2	4
5	f	0	9	2	7.86934		GE1	4	400	5	4/5	i4/5	IntAnterior	3	12
5	f	0	9	3	89.7481		GE1	4	400	5	4/5	i4/5	IntAnterior	3	12
5	f	0	9	4	78.2119		GE1	4	400	12	2	m2	MedAnterior	5	13
5	f	0	9	5	69.1342		GE1	4	400	12	2	m2	MedAnterior	5	13
5	f	0	9	6	72.992		GE1	4	400	12	3	m3	MedAnterior	5	14
5	f	0	9	7	55.1843		GE1	4	400	12	3	m3	MedAnterior	5	14
5	f	0	9	8	35.9631		GE1	4	400	12	3	m3	MedAnterior	5	14
5	f	0	9	9	56.0445		GE1	4	400	12	4/5	m4/5	MedAnterior	5	15
5	f	0	9	10	185.984		GE1	4	400	12	4/5	m4/5	MedAnterior	5	15
5	f	0	9	11	105.384		GE1	4	400	12	4/5	m4/5	MedAnterior	5	15
5	f	0	9	12	117.001		GE1	4	400	12	6	m6	MedPosterior	6	16
5	f	0	9	13	68.2597		GE1	4	400	12	6	m6	MedPosterior	6	16
5	f	0	9	14	51.1505		GE1	4	400	12	7	m7	MedPosterior	6	17
5	f	0	9	15	62.5686		GE1	4	400	12	8	m8	MedPosterior	6	18
5	f	0	9	16	14.0008		GE1	4	400	12	9	m9	MedPosterior	6	19
5	f	0	9	17	29.2098		GE1	4	400	12	10	m10	MedPosterior	6	20
5	m	1	10	200115b_1042	19.3392		GE1	4	400	3	sim	Lsim	Lateral	2	3
5	m	1	10	2	120.911		GE1	4	400	3	crus1	Lcrus1	Lateral	2	4
5	m	1	10	3	15.5713		GE1	4	400	3	crus1	Lcrus1	Lateral	2	4
5	m	1	10	4	110.303		GE1	4	400	6	PM	iPM	IntPosterior	4	10
5	m	1	10	5			GE1	4	400	6	crus2	icrus2	IntPosterior	4	9
5	m	1	10	6	91.4566		GE1	4	400	6	crus1	icrus1	IntPosterior	4	8
5	m	1	10	7	30.8627		GE1	4	400	6	PM	iPM	IntPosterior	4	10
5	m	1	10	8	96.444		GE1	4	400	12	2	m2	MedAnterior	5	13
5	m	1	10	9	51.9135		GE1	4	400	12	2	m2	MedAnterior	5	13
5	m	1	10	10	104.908		GE1	4	400	12	3	m3	MedAnterior	5	14
5	m	1	10	11	86.4654		GE1	4	400	12	3	m3	MedAnterior	5	14
5	m	1	10	12			GE1	4	400	12	4/5	m4/5	MedAnterior	5	15
5	m	1	10	13	68.2513		GE1	4	400	12	4/5	m4/5	MedAnterior	5	15
5	m	1	10	14	120.474		GE1	4	400	12	4/5	m4/5	MedAnterior	5	15
5	m	1	10	15	106.82		GE1	4	400	12	6	m6	MedPosterior	6	16
5	m	1	10	16	106.95		GE1	4	400	12	7	m7	MedPosterior	6	17
5	m	1	10	17	156.712		GE1	4	400	12	8	m8	MedPosterior	6	18
5	m	1	10	18	83.149		GE1	4	400	12	8	m8	MedPosterior	6	18
5	m	1	10	19	83.9088		GE1	4	400	12	9	m9	MedPosterior	6	19
5	m	1	10	20	106.619		GE1	4	400	12	9	m9	MedPosterior	6	19
5	m	1	10	21	39.486		GE1	4	400	12	10	m10	MedPosterior	6	20
5	m	1	10	22	20.8504		GE1	4	400	12	10	m10	MedPosterior	6	20
																			#NAME?

## Sheet: Animal Masked ID#
	190409a_1382	AtmN/N; Aptx-/-	1
	190409b_1385	AtmN/N; Aptx-/-	2
	190411a_1412	AtmN/N; Aptx-/-	3
	190412a_1413	AtmN/N; Aptx-/-	4
	190611b_1727	AtmN/N; Aptx-/-	5
	190612a_1729	AtmN/N; Aptx-/-	6
	190612c_1710	AtmN/N; Aptx-/-	7
	190725b_1574	AtmN/N; Aptx-/-	8
	190812a_1657	AtmN/N; Aptx-/-	9
	190823a_1670	AtmN/N; Aptx-/-	10
	190823b_1671	AtmN/N; Aptx-/-	11
	190826a_1695	AtmN/N; Aptx-/-	12
	190924a_1830	AtmN/N; Aptx-/-	13
	191008_1874	AtmN/N; Aptx-/-	14
	191122b_1711	AtmN/N; Aptx-/-	15
	191216_952	AtmN/N; Aptx-/-	16
	191223_1785	AtmN/N; Aptx-/-	17
	191229b_989	AtmN/N; Aptx-/-	18
	200105a_2226	AtmN/N; Aptx-/-	19
	200129a_2004	AtmN/N; Aptx-/-	20
	200129b_2040	AtmN/N; Aptx-/-	21
	200225_2580	AtmN/N; Aptx-/-	22
	200709_1906	AtmN/N; Aptx-/-	23
	200303b_1276	AtmN/N; Aptx+/-	1
	200305b_1284	AtmN/N; Aptx+/-	2
	191204b_2155	AtmN/N; Aptx+/+	1
	191213a_2408	AtmN/N; Aptx+/+	2
	191213b_2407	AtmN/N; Aptx+/+	3
	200113_1923	AtmN/N; Aptx+/+	4
	200131_2303	AtmN/N; Aptx+/+	5
	200205a_2319	AtmN/N; Aptx+/+	6
	200205b_2321	AtmN/N; Aptx+/+	7
	200220_2118	AtmN/N; Aptx+/+	8
	200227_2573	AtmN/N; Aptx+/+	9
	200228_2577	AtmN/N; Aptx+/+	10
	200302_2151	AtmN/N; Aptx+/+	11
	200303a_1266	AtmN/N; Aptx+/+	12
	200304_1306	AtmN/N; Aptx+/+	13
	200305a_1262	AtmN/N; Aptx+/+	14
	200309_2597	AtmN/N; Aptx+/+	15
	2003010_2178	AtmN/N; Aptx+/+	16
	2003012_2638	AtmN/N; Aptx+/+	17
	200401_2629	AtmN/N; Aptx+/+	18
	200429_2563	AtmN/N; Aptx+/+	19
	200507a_2311	AtmN/N; Aptx+/+	20
	200507b_2314	AtmN/N; Aptx+/+	21
	200528_1658	AtmN/N; Aptx+/+	22
	200713_2697	AtmN/N; Aptx+/+	23
	200714a_1915	AtmN/N; Aptx+/+	24
	200714b_1875	AtmN/N; Aptx+/+	25
	200715_1917	AtmN/N; Aptx+/+	26
	191119_1665	AtmN/Wt; Aptx-/-	1
	191126_861	AtmN/Wt; Aptx-/-	2
	191127_862	AtmN/Wt; Aptx-/-	3
	191209_896	AtmN/Wt; Aptx-/-	4
	191211a_893	AtmN/Wt; Aptx-/-	5
	191211b_892	AtmN/Wt; Aptx-/-	6
	191218b_941	AtmN/Wt; Aptx-/-	7
	191229a_1005	AtmN/Wt; Aptx-/-	8
	200102a_1002	AtmN/Wt; Aptx-/-	9
	200115b_1042	AtmN/Wt; Aptx-/-	10
	190417_1386	AtmWt/Wt; Aptx-/-	1
	190418_1442	AtmWt/Wt; Aptx-/-	2
	190422_1445	AtmWt/Wt; Aptx-/-	3
	190604_1644	AtmWt/Wt; Aptx-/-	4
	190611a_1726	AtmWt/Wt; Aptx-/-	5
	190612b_1760	AtmWt/Wt; Aptx-/-	6
	190619a_1756	AtmWt/Wt; Aptx-/-	7
	190620a_1757	AtmWt/Wt; Aptx-/-	8
	190725a_1569	AtmWt/Wt; Aptx-/-	9
	190726a_1567	AtmWt/Wt; Aptx-/-	10
	190807a_1622	AtmWt/Wt; Aptx-/-	11
	190809a_1638	AtmWt/Wt; Aptx-/-	12
	190819a_1706	AtmWt/Wt; Aptx-/-	13
	190822_1724	AtmWt/Wt; Aptx-/-	14
	190822a_1725	AtmWt/Wt; Aptx-/-	15
	190903_1735	AtmWt/Wt; Aptx-/-	16
	191004a_1449	AtmWt/Wt; Aptx-/-	17
	191004b_1447	AtmWt/Wt; Aptx-/-	18
	191030_1576	AtmWt/Wt; Aptx-/-	19
	191031_1616	AtmWt/Wt; Aptx-/-	20
	191101_1575	AtmWt/Wt; Aptx-/-	21
	191111a_1642	AtmWt/Wt; Aptx-/-	22
	191111b_1645	AtmWt/Wt; Aptx-/-	23
	200102b_1004	AtmWt/Wt; Aptx-/-	24
	200103a_1001	AtmWt/Wt; Aptx-/-	25
	200105b_1003	AtmWt/Wt; Aptx-/-	26
	200109_1024	AtmWt/Wt; Aptx-/-	27
	200114_1104	AtmWt/Wt; Aptx-/-	28
	200115a_1049	AtmWt/Wt; Aptx-/-	29
	200116_1069	AtmWt/Wt; Aptx-/-	30
	190114_1011	AtmWt/Wt; Aptx+/+	1
	190115_1012	AtmWt/Wt; Aptx+/+	2
	190408_1373	AtmWt/Wt; Aptx+/+	3
	190416_1374	AtmWt/Wt; Aptx+/+	4
	190812b_1949	AtmWt/Wt; Aptx+/+	5
	190819b_1709	AtmWt/Wt; Aptx+/+	6
	190920a_1820	AtmWt/Wt; Aptx+/+	7
	190923a_1809	AtmWt/Wt; Aptx+/+	8
	190923b_1818	AtmWt/Wt; Aptx+/+	9
	191112_2117	AtmWt/Wt; Aptx+/+	10
	191114_2091	AtmWt/Wt; Aptx+/+	11
	191115a_2299	AtmWt/Wt; Aptx+/+	12
	191115b_2300	AtmWt/Wt; Aptx+/+	13
	191121a_1693	AtmWt/Wt; Aptx+/+	14
	191122b_1694	AtmWt/Wt; Aptx+/+	15
	191202a_1743	AtmWt/Wt; Aptx+/+	16
	191202b_1741	AtmWt/Wt; Aptx+/+	17
	191204a_2152	AtmWt/Wt; Aptx+/+	18
	191206_2167	AtmWt/Wt; Aptx+/+	19
	191217a_940	AtmWt/Wt; Aptx+/+	20
	191217b_939	AtmWt/Wt; Aptx+/+	21
	191218a_962	AtmWt/Wt; Aptx+/+	22
	191230a_1010	AtmWt/Wt; Aptx+/+	23
	191230b_1009	AtmWt/Wt; Aptx+/+	24
	200103b_969	AtmWt/Wt; Aptx+/+	25
	200107_1018	AtmWt/Wt; Aptx+/+	26
	200127a_2035	AtmWt/Wt; Aptx+/+	27
	200127b_2018	AtmWt/Wt; Aptx+/+	28
	200221_2087	AtmWt/Wt; Aptx+/+	29

## Sheet: all
sex	sex code (1=m)	animal ID		Average frequency	Age	Genotype	age	Group	slice	folia	Position name	Region name	Gross Region ID	Position ID
f	0	4	9	156.913	1	1	45	GE2	2	pfl	Lpfl	Vestibular	1	1
m	1	7	5	28.3741	2	1	120	GE3	3	pfl	Lpfl	Vestibular	1	1			Position ID			Gross Region ID
m	1	7	6		2	1	120	GE3	3	pfl	Lpfl	Vestibular	1	1			Lpfl	1		Vestibular	1
m	1	9	7	34.405	2	1	120	GE3	3	pfl	Lpfl	Vestibular	1	1			Lfl	2		Lateral	2
f	0	14	2	51.1401	3	1	210	GE4	3	pfl	Lpfl	Vestibular	1	1			Lsim	3		IntAnterior	3
f	0	14	3	52.6203	3	1	210	GE4	3	pfl	Lpfl	Vestibular	1	1			Lcrus1	4		IntPosterior	4
f	0	15	191122b_1694	30.9035	3	1	210	GE4	3	pfl	Lpfl	Vestibular	1	1			Lcrus2	5		MedAnterior	5
f	0	15	2	74.3152	3	1	210	GE4	3	pfl	Lpfl	Vestibular	1	1			Lpm	6		MedPosterior	6
f	0	28	200127b_2018	65.8088	3	1	210	GE4	3	PFl	LPFl	Vestibular	1	1			isim	7
f	0	28	2	8.78667	3	1	210	GE4	3	PFl	LPFl	Vestibular	1	1			icrus1	8
m	1	29	200221_2087	31.7406	3	1	210	GE4	3		LPFl	Vestibular	1	1			icrus2	9		Genotype ID
m	1	29		31.3247	3	1	210	GE4	3		lPFl	Vestibular	1	1			ipm	10		AtmWt/Wt; Aptx+/+	1
f	0	23	191230a_1010	62.3627	4	1	400	GE1	3	PFl	LPFl	Vestibular	1	1			icop	11		AtmN/N; Aptx-/-	2
f	0	23		33.6799	4	1	400	GE1	3	PFl	LPFl	Vestibular	1	1			i4/5	12		AtmN/N; Aptx+/+	3
f	0	24	191230b_1009	41.1202	4	1	400	GE1	3	PFl	LPFl	Vestibular	1	1			m2	13		AtmWt/Wt; Aptx-/-	4
f	0	26	3	17.9927	4	1	400	GE1	2	PFl	LPFl	Vestibular	1	1			m3	14		AtmN/Wt; Aptx-/-	5
m	1	20	2	19.5522	4	1	400	GE1	3	PFl	LPFl	Vestibular	1	1			m4/5	15
m	1	21	191217b_939	23.0195	4	1	400	GE1	3	PFl	LPFl	Vestibular	1	1			m6	16
m	1	21	2	26.0263	4	1	400	GE1	3	PFl	LPFl	Vestibular	1	1			m7	17
m	1	22	3	52.3761	4	1	400	GE1	3	PFl	LPFl	Vestibular	1	1			m8	18
f	0	22	200225_2580	13.7856	1	2	45	GE2	3	PFl	LPFl	Vestibular	1	1			m9	19
f	0	22		16.48	1	2	45	GE2	3	PFl	LPFl	Vestibular	1	1			m10	20
m	1	5	7	17.6309	1	2	45	GE2	2	pfl	Lpfl	Vestibular	1	1
m	1	5	8	71.7681	1	2	45	GE2	2	pfl	Lpfl	Vestibular	1	1
f	0	8	190725b_1574	56.1454	2	2	120	GE3	3	pfl	Lpfl	Vestibular	1	1
f	0	8	2	51.4891	2	2	120	GE3	3	pfl	Lpfl	Vestibular	1	1
f	0	10		17.085	2	2	120	GE3	3	pfl	Lpfl	Vestibular	1	1
m	1	13	9	27.4684	2	2	120	GE3	2	pfl	Lpfl	Vestibular	1	1
m	1	14	6	23.1282	2	2	120	GE3	3	pfl	Lpfl	Vestibular	1	1
m	1	14	7	6.73257	2	2	120	GE3	3	pfl	Lpfl	Vestibular	1	1
m	1	19		1.91477	2	2	120	GE3	3	PFl	LPFl	Vestibular	1	1
m	1	19		4.07863	2	2	120	GE3	3	PFl	LPFl	Vestibular	1	1
m	1	17	3	31.9591	3	2	210	GE4	3	PFl	LPFl	Vestibular	1	1
m	1	20	200129a_2004	30.6412	3	2	210	GE4	3	PFl	LPFl	Vestibular	1	1
m	1	20		55.4673	3	2	210	GE4	3	PFl	LPFl	Vestibular	1	1
f	0	16	191216_952		4	2	400	GE1	3	PFl	LPFl	Vestibular	1	1
m	1	23		21.5281	4	2	400	GE1	2	pfl	Lpfl	Vestibular	1	1
m	1	23		38.3563	4	2	400	GE1	2	pfl	Lpfl	Vestibular	1	1
m	1	23		20.6223	4	2	400	GE1	3	pfl	Lpfl	Vestibular	1	1
m	1	23		43.9022	4	2	400	GE1	3	pfl	Lpfl	Vestibular	1	1
f	0	15	200309_2597	35.5806	1	3	45	GE2	3	pfl	Lpfl	Vestibular	1	1
f	0	15		9.48919	1	3	45	GE2	3	pfl	Lpfl	Vestibular	1	1
f	0	17		14.114	1	3	45	GE2	3	pfl	Lpfl	Vestibular	1	1
f	0	17		16.9306	1	3	45	GE2	3	pfl	Lpfl	Vestibular	1	1
f	0	18	200401_2629	26.2018	1	3	45	GE2	3	pfl	Lpfl	Vestibular	1	1
m	1	2	191213a_2408		1	3	45	GE2	3	PFl	LPFl	Vestibular	1	1
m	1	3	191213b_2407	16.8982	1	3	45	GE2	3	PFl	LPFl	Vestibular	1	1
m	1	3		62.5748	1	3	45	GE2	3	PFl	LPFl	Vestibular	1	1
m	1	9	2	7.41151	1	3	45	GE2	3	PFl	LPFl	Vestibular	1	1
m	1	10	200228_2577	69.2009	1	3	45	GE2	3	PFl	LPFl	Vestibular	1	1
m	1	10	2	73.7795	1	3	45	GE2	3	PFl	LPFl	Vestibular	1	1
f	0	1	191204b_2155	22.3807	2	3	120	GE3	3	pfl	Lpfl	Vestibular	1	1
m	1	5	200131_2303	17.2006	2	3	120	GE3	3	PFl	LPFl	Vestibular	1	1
m	1	5			2	3	120	GE3	3	PFl	LPFl	Vestibular	1	1
m	1	6		14.148	2	3	120	GE3	3	PFl	LPFl	Vestibular	1	1
m	1	7	200205b_2321	60.7057	2	3	120	GE3	3	PFl	LPFl	Vestibular	1	1
f	0	16	2003010_2178	8.49855	3	3	210	GE4	3	pfl	Lpfl	Vestibular	1	1
f	0	16	2	70.616	3	3	210	GE4	3	pfl	Lpfl	Vestibular	1	1
f	0	16	3		3	3	210	GE4	3	pfl	Lpfl	Vestibular	1	1
f	0	21	2	17.6353	3	3	210	GE4	3	pfl	Lpfl	Vestibular	1	1
f	0	21	3		3	3	210	GE4	3	pfl	Lpfl	Vestibular	1	1
m	1	8	200220_2118	28.2083	3	3	210	GE4	3	PFl	LPFl	Vestibular	1	1
m	1	11	200302_2151		3	3	210	GE4	3	pfl	Lpfl	Vestibular	1	1
f	0	13		59.7521	4	3	400	GE1	3	pfl	Lpfl	Vestibular	1	1
f	0	25	200714b_1875	44.1059	4	3	400	GE1	3	pfl	Lpfl	Vestibular	1	1
m	1	12	200303a_1266	7.09621	4	3	400	GE1	3	pfl	Lpfl	Vestibular	1	1
m	1	22	200528_1658	19.1004	4	3	400	GE1	2	pfl	Lpfl	Vestibular	1	1
m	1	22		9.72435	4	3	400	GE1	3	pfl	Lpfl	Vestibular	1	1
m	1	24		70.8331	4	3	400	GE1	2	pfl	Lpfl	Vestibular	1	1
m	1	24		110.874	4	3	400	GE1	2	pfl	Lpfl	Vestibular	1	1
m	1	24		63.4625	4	3	400	GE1	3	pfl	Lpfl	Vestibular	1	1
m	1	26	200715_1917	22.7068	4	3	400	GE1	2	pfl	Lpfl	Vestibular	1	1
m	1	26	3	57.0225	4	3	400	GE1	2	pfl	Lpfl	Vestibular	1	1
f	0	4	190604_1644	77.9454	1	4	45	GE2	3	pfl	Lpfl	Vestibular	1	1
m	1	1	190417_1386	75.0155	1	4	45	GE2	4	pfl	Lpfl	Vestibular	1	1
m	1	1	2	110.224	1	4	45	GE2	4	pfl	Lpfl	Vestibular	1	1
m	1	11	7	22.2253	2	4	120	GE3	2	pfl	Lpfl	Vestibular	1	1
f	0	24	200102b_1004	30.3241	4	4	400	GE1	3	PFl	LPFl	Vestibular	1	1
f	0	25	200103a_1001	17.4538	4	4	400	GE1	3	PFl	LPFl	Vestibular	1	1
f	0	25	2	75.5659	4	4	400	GE1	3	PFl	LPFl	Vestibular	1	1
f	0	26	200105b_1003	41.1496	4	4	400	GE1	3	PFl	LPFl	Vestibular	1	1
f	0	27	200109_1024	22.7324	4	4	400	GE1	3	PFl	LPFl	Vestibular	1	1
m	1	28	3		4	4	400	GE1	3	PFl	LPFl		#N/A	1
m	1	30	2	28.0254	4	4	400	GE1	3	PFl	LPFl	Vestibular	1	1
f	0	8	3	13.0315	4	5	400	GE1	3	PFl	LPFl	Vestibular	1	1
m	1	2	3	156.665	4	5	400	GE1	3	pfl	Lpfl	Vestibular	1	1
m	1	3	191127_862	39.5081	4	5	400	GE1	2	pfl	Lpfl	Vestibular	1	1
m	1	7	2	22.3931	4	5	400	GE1	3	pfl	Lpfl	Vestibular	1	1
f	0	18	191204a_2152	119.292	2	1	120	GE3	3	Fl	LFl	Vestibular	1	2
f	0	19	191206_2167	26.7172	2	1	120	GE3	3	Fl	LFl	Vestibular	1	2
m	1	8	4	38.2914	2	1	120	GE3	3	fl	Lfl	Vestibular	1	2
m	1	9	8	25.6864	2	1	120	GE3	3	fl	Lfl	Vestibular	1	2
m	1	9	9	93.8477	2	1	120	GE3	3	fl	Lfl	Vestibular	1	2
f	0	28	3	60.6044	3	1	210	GE4	3	Fl	LFl	Vestibular	1	2
m	1	16	191202a_1743	56.8299	3	1	210	GE4	2	fl	Lfl	Vestibular	1	2
m	1	29		55.5743	3	1	210	GE4	3		lFl	Vestibular	1	2
f	0	25	200103b_969	116.35	4	1	400	GE1	3	Fl	LFl	Vestibular	1	2
f	0	25	2	131.122	4	1	400	GE1	3	Fl	LFl	Vestibular	1	2
f	0	26	200107_1018	57.5223	4	1	400	GE1	2	Fl	LFl	Vestibular	1	2
f	0	26	2	105.412	4	1	400	GE1	2	Fl	LFl	Vestibular	1	2
m	1	20	191217a_940	85.6056	4	1	400	GE1	3	Fl	LFl	Vestibular	1	2
m	1	21	3	10.8709	4	1	400	GE1	3	Fl	LFl	Vestibular	1	2
m	1	22	191218a_962	106.403	4	1	400	GE1	3	Fl	LFl	Vestibular	1	2
m	1	22	2		4	1	400	GE1	3	Fl	LFl	Vestibular	1	2
m	1	14	8	48.3449	2	2	120	GE3	3	fl	Lfl	Vestibular	1	2
m	1	14	9	58.162	2	2	120	GE3	3	fl	Lfl	Vestibular	1	2
m	1	19	200105a_2226	32.4529	2	2	120	GE3	3	Fl	LFl	Vestibular	1	2
m	1	17	191223_1785	51.9358	3	2	210	GE4	3	Fl	LFl	Vestibular	1	2
m	1	17	2	19.0154	3	2	210	GE4	3	Fl	LFl	Vestibular	1	2
m	1	20		10.2456	3	2	210	GE4	3	Fl	LFl	Vestibular	1	2
m	1	20		9.31753	3	2	210	GE4	3	Fl	LFl	Vestibular	1	2
m	1	21	200129b_2040	18.5146	3	2	210	GE4	3	Fl	LFl	Vestibular	1	2
m	1	21		44.7434	3	2	210	GE4	3	Fl	LFl	Vestibular	1	2
f	0	16		15.088	4	2	400	GE1	3	Fl	LFl	Vestibular	1	2
m	1	18	191229b_989	35.1897	4	2	400	GE1	3	Fl	LFl	Vestibular	1	2
f	0	17	2003012_2638	85.6664	1	3	45	GE2	3	fl	Lfl	Vestibular	1	2
f	0	17		64.1995	1	3	45	GE2	3	fl	Lfl	Vestibular	1	2
m	1	5		115.519	2	3	120	GE3	3	Fl	LFl	Vestibular	1	2
m	1	6	200205a_2319		2	3	120	GE3	3	Fl	LFl	Vestibular	1	2
m	1	19		21.6511	2	3	120	GE3	3	fl	Lfl	Vestibular	1	2
f	0	21	200507b_2314	4.73596	3	3	210	GE4	3	fl	Lfl	Vestibular	1	2
m	1	4	200113_1923	32.4618	3	3	210	GE4	2	Fl	LFl	Vestibular	1	2
m	1	4		81.7897	3	3	210	GE4	2	Fl	LFl	Vestibular	1	2
m	1	4		34.5585	3	3	210	GE4	2	Fl	LFl	Vestibular	1	2
m	1	11	2	57.4812	3	3	210	GE4	3	fl	Lfl	Vestibular	1	2
f	0	13	200304_1306	13.8456	4	3	400	GE1	3	fl	Lfl	Vestibular	1	2
f	0	13		35.5157	4	3	400	GE1	3	fl	Lfl	Vestibular	1	2
f	0	14	200305a_1262	86.7939	4	3	400	GE1	3	fl	Lfl	Vestibular	1	2
f	0	25	2	77.9292	4	3	400	GE1	3	fl	Lfl	Vestibular	1	2
m	1	12		54.0747	4	3	400	GE1	3	fl	Lfl	Vestibular	1	2
m	1	12		46.0633	4	3	400	GE1	3	fl	Lfl	Vestibular	1	2
m	1	22		24.7458	4	3	400	GE1	2	fl	Lfl	Vestibular	1	2
m	1	22		56.8059	4	3	400	GE1	3	fl	Lfl	Vestibular	1	2
m	1	22		32.5139	4	3	400	GE1	3	fl	Lfl	Vestibular	1	2
m	1	24	200714a_1915		4	3	400	GE1	2	fl	Lfl	Vestibular	1	2
m	1	24		91.7622	4	3	400	GE1	2	fl	Lfl	Vestibular	1	2
m	1	24		44.5396	4	3	400	GE1	3	fl	Lfl	Vestibular	1	2
m	1	26	2	103.643	4	3	400	GE1	2	fl	Lfl	Vestibular	1	2
m	1	26	4	15.0304	4	3	400	GE1	2	fl	Lfl	Vestibular	1	2
f	0	20	5	66.1968	3	4	210	GE4	2	fl	Lfl	Vestibular	1	2
f	0	26	2	92.3575	4	4	400	GE1	3	Fl	LFl	Vestibular	1	2
m	1	28	200114_1104	37.2847	4	4	400	GE1	3	Fl	LFl	Vestibular	1	2
m	1	28	2	15.7871	4	4	400	GE1	3	Fl	LFl	Vestibular	1	2
m	1	29	200115a_1049	35.9572	4	4	400	GE1	2	Fl	LFl	Vestibular	1	2
m	1	30	200116_1069	28.0254	4	4	400	GE1	3	Fl	LFl	Vestibular	1	2
f	0	6	191211b_892	81.7662	4	5	400	GE1	3	Fl	LFl	Vestibular	1	2
f	0	6	2		4	5	400	GE1	3	Fl	LFl	Vestibular	1	2
f	0	8	191229a_1005	63.109	4	5	400	GE1	3	Fl	LFl	Vestibular	1	2
f	0	8	2	72.4996	4	5	400	GE1	3	Fl	LFl	Vestibular	1	2
m	1	2	191126_861	22.5349	4	5	400	GE1	3	fl	Lfl	Vestibular	1	2
m	1	2	2	22.6332	4	5	400	GE1	3	fl	Lfl	Vestibular	1	2
m	1	4	191209_896	70.7465	4	5	400	GE1	3	Fl	LFl	Vestibular	1	2
m	1	7	191218b_941	15.4379	4	5	400	GE1	3	Fl	LFl	Vestibular	1	2
f	0	3	190408_1373	4.92272	1	1	45	GE2	3	sim	Lsim	Lateral	2	3
f	0	3	2	61.7198	1	1	45	GE2	3	sim	Lsim	Lateral	2	3
f	0	4	8	21.9762	1	1	45	GE2	2	sim	Lsim	Lateral	2	3
f	0	13	191115b_2300	15.993	1	1	45	GE2	3	sim	Lsim	Lateral	2	3
m	1	2	6	137.485	1	1	45	GE2	4	sim	Lsim	Lateral	2	3
f	0	10	191112_2117	25.4932	2	1	120	GE3	3	sim	Lsim	Lateral	2	3
f	0	10	2	16.6412	2	1	120	GE3	3	sim	Lsim	Lateral	2	3
f	0	19	8	126.015	2	1	120	GE3	3	Sim	LSim	Lateral	2	3
f	0	19	9	42.7682	2	1	120	GE3	3	Sim	LSim	Lateral	2	3
m	1	6	3	47.0183	2	1	120	GE3	2	sim	Lsim	Lateral	2	3
m	1	9	190923b_1818	62.5491	2	1	120	GE3	3	sim	Lsim	Lateral	2	3
m	1	9	2		2	1	120	GE3	3	sim	Lsim	Lateral	2	3
f	0	15	4		3	1	210	GE4	3	sim	Lsim	Lateral	2	3
f	0	28	4	141.475	3	1	210	GE4	3	sim	Lsim	Lateral	2	3
m	1	17	191202b_1741	104.846	3	1	210	GE4	2	sim	Lsim	Lateral	2	3
m	1	17	2	21.6577	3	1	210	GE4	2	sim	Lsim	Lateral	2	3
m	1	29			3	1	210	GE4	3		lSim	Lateral	2	3
f	0	24	7	27.2466	4	1	400	GE1	3	Sim	LSim	Lateral	2	3
f	0	24	8	129.011	4	1	400	GE1	3	Sim	LSim	Lateral	2	3
f	0	25	3	5.80492	4	1	400	GE1	3	Sim	LSim	Lateral	2	3
m	1	20	3	28.7165	4	1	400	GE1	3	Sim	LSim	Lateral	2	3
m	1	20	4	109.098	4	1	400	GE1	3	Sim	LSim	Lateral	2	3
m	1	22	4	181.736	4	1	400	GE1	3	sim	Lsim	Lateral	2	3
m	1	22	5	32.8491	4	1	400	GE1	3	sim	Lsim	Lateral	2	3
f	0	1	190409a_1382	34.9878	1	2	45	GE2	3	sim	Lsim	Lateral	2	3
f	0	2	3	82.8459	1	2	45	GE2	3	sim	Lsim	Lateral	2	3
f	0	2	4	58.2834	1	2	45	GE2	3	sim	Lsim	Lateral	2	3
f	0	7	190612c_1710	66.3018	1	2	45	GE2	3	sim	Lsim	Lateral	2	3
f	0	7	2	129.268	1	2	45	GE2	3	sim	Lsim	Lateral	2	3
m	1	4	8	77.024	1	2	45	GE2	2	sim	Lsim	Lateral	2	3
m	1	5	190611b_1727	23.4351	1	2	45	GE2	2	sim	Lsim	Lateral	2	3
f	0	12	190826a_1695	61.0936	2	2	120	GE3	3	sim	Lsim	Lateral	2	3
m	1	13	190924a_1830	107.827	2	2	120	GE3	2	sim	Lsim	Lateral	2	3
m	1	13	2	46.2438	2	2	120	GE3	2	sim	Lsim	Lateral	2	3
m	1	13	3	41.4078	2	2	120	GE3	2	sim	Lsim	Lateral	2	3
m	1	13	4	39.2702	2	2	120	GE3	2	sim	Lsim	Lateral	2	3
m	1	14	5	61.4576	2	2	120	GE3	3	sim	Lsim	Lateral	2	3
m	1	17	4	56.5182	3	2	210	GE4	3	Sim	LSim	Lateral	2	3
m	1	17	5	33.5249	3	2	210	GE4	3	Sim	LSim	Lateral	2	3
m	1	20		34.6261	3	2	210	GE4	3	sim	Lsim	Lateral	2	3
m	1	20		5.80686	3	2	210	GE4	3	sim	Lsim	Lateral	2	3
m	1	21		9.4436	3	2	210	GE4	3	Sim	LSim	Lateral	2	3
f	0	15			1	3	45	GE2	3	sim	Lsim	Lateral	2	3
f	0	17		100.275	1	3	45	GE2	3	sim	Lsim	Lateral	2	3
f	0	17		30.0457	1	3	45	GE2	3	sim	Lsim	Lateral	2	3
f	0	18	6	27.532	1	3	45	GE2	3	sim	Lsim	Lateral	2	3
m	1	10	6		1	3	45	GE2	3	sim	Lsim	Lateral	2	3
m	1	5		55.1946	2	3	120	GE3	3	sim	Lsim	Lateral	2	3
m	1	7		29.092	2	3	120	GE3	3	sim	Lsim	Lateral	2	3
m	1	23	200713_2697	72.327	2	3	120	GE3	3	sim	Lsim	Lateral	2	3
m	1	23		115.046	2	3	120	GE3	3	sim	Lsim	Lateral	2	3
f	0	16	7	18.3386	3	3	210	GE4	3	sim	Lsim	Lateral	2	3
f	0	20	200507a_2311	128.31	3	3	210	GE4	3	sim	Lsim	Lateral	2	3
m	1	4		147.864	3	3	210	GE4	3	Sim	LSim	Lateral	2	3
m	1	4		43.7584	3	3	210	GE4	3	sim	Lsim	Lateral	2	3
m	1	8		73.4378	3	3	210	GE4	3	sim	Lsim	Lateral	2	3
m	1	22		11.9359	4	3	400	GE1	3	sim	Lsim	Lateral	2	3
m	1	26	5	48.4485	4	3	400	GE1	2	sim	Lsim	Lateral	2	3
f	0	2	190418_1442	64.4938	1	4	45	GE2	3	sim	Lsim	Lateral	2	3
f	0	2	2	75.3448	1	4	45	GE2	3	sim	Lsim	Lateral	2	3
f	0	2	3	120.79	1	4	45	GE2	3	sim	Lsim	Lateral	2	3
f	0	2	4	12.9904	1	4	45	GE2	3	sim	Lsim	Lateral	2	3
f	0	4	5	29.1071	1	4	45	GE2	3	sim	Lsim	Lateral	2	3
f	0	5	6		1	4	45	GE2	3	sim	Lsim		#N/A	3
f	0	6	5	81.4448	1	4	45	GE2	3	sim	Lsim	Lateral	2	3
m	1	1	9		1	4	45	GE2	4	sim	Lsim		#N/A	3
m	1	7	4	68.7976	1	4	45	GE2	3	sim	Lsim	Lateral	2	3
m	1	8	190620a_1757	159.832	1	4	45	GE2	3	sim	Lsim	Lateral	2	3
m	1	8	2		1	4	45	GE2	3	sim	Lsim		#N/A	3
f	0	10	190726a_1567	39.4324	2	4	120	GE3	3	sim	Lsim	Lateral	2	3
f	0	10	2		2	4	120	GE3	3	sim	Lsim		#N/A	3
f	0	14	190822_1724	43.9557	2	4	120	GE3	3	sim	Lsim	Lateral	2	3
f	0	14	1	60.517	2	4	120	GE3	3	sim	Lsim	Lateral	2	3
m	1	11	190807a_1622	35.685	2	4	120	GE3	2	sim	Lsim	Lateral	2	3
m	1	16	7		2	4	120	GE3	3	sim	Lsim		#N/A	3
m	1	16	8	44.7149	2	4	120	GE3	3	sim	Lsim	Lateral	2	3
f	0	19	191030_1576	9.93688	3	4	210	GE4	3	sim	Lsim	Lateral	2	3
f	0	19		111.843	3	4	210	GE4	3	sim	Lsim	Lateral	2	3
m	1	17	191004a_1449	73.8418	3	4	210	GE4	3	sim	Lsim	Lateral	2	3
m	1	17	2	93.0851	3	4	210	GE4	3	sim	Lsim	Lateral	2	3
m	1	17	3	32.0745	3	4	210	GE4	3	sim	Lsim	Lateral	2	3
f	0	24	2	117.937	4	4	400	GE1	3	Sim	LSim	Lateral	2	3
f	0	27	5		4	4	400	GE1	3	Sim	LSim		#N/A	3
m	1	30	5	155.505	4	4	400	GE1	3	sim	Lsim	Lateral	2	3
m	1	30	6	107.618	4	4	400	GE1	3	sim	Lsim	Lateral	2	3
f	0	6	3	58.2	4	5	400	GE1	3	sim	Lsim	Lateral	2	3
f	0	6	4	6.13429	4	5	400	GE1	3	sim	Lsim	Lateral	2	3
f	0	8	4	134.518	4	5	400	GE1	3	sim	Lsim	Lateral	2	3
f	0	8	5	33.934	4	5	400	GE1	3	sim	Lsim	Lateral	2	3
m	1	4	4	27.8758	4	5	400	GE1	3	sim	Lsim	Lateral	2	3
m	1	5	191211a_893	85.7721	4	5	400	GE1	3	sim	Lsim	Lateral	2	3
m	1	10	200115b_1042	19.3392	4	5	400	GE1	3	sim	Lsim	Lateral	2	3
f	0	3	3	29.6772	1	1	45	GE2	3	crus1	Lcrus1	Lateral	2	4
f	0	4	5		1	1	45	GE2	2	crus1	Lcrus1	Lateral	2	4
f	0	4	6	70.5702	1	1	45	GE2	2	crus1	Lcrus1	Lateral	2	4
f	0	4	7	105.444	1	1	45	GE2	2	crus1	Lcrus1	Lateral	2	4
f	0	12	191115a_2299	173.974	1	1	45	GE2	3	crus1	Lcrus1	Lateral	2	4
f	0	13	2	53.1947	1	1	45	GE2	3	crus1	Lcrus1	Lateral	2	4
f	0	13	3		1	1	45	GE2	3	crus1	Lcrus1	Lateral	2	4
m	1	1	7	20.7807	1	1	45	GE2	3	crus1	Lcrus1	Lateral	2	4
m	1	2	3	5.03059	1	1	45	GE2	4	crus1	Lcrus1	Lateral	2	4
m	1	2	4	68.4195	1	1	45	GE2	4	crus1	Lcrus1	Lateral	2	4
m	1	2	5	29.3667	1	1	45	GE2	4	crus1	Lcrus1	Lateral	2	4
m	1	5	5	42.301	1	1	45	GE2	3	crus1	Lcrus1	Lateral	2	4
f	0	10	3	141.053	2	1	120	GE3	3	crus1	Lcrus1	Lateral	2	4
f	0	11	191114_2091	108.426	2	1	120	GE3	3	crus1	Lcrus1	Lateral	2	4
f	0	19	6	66.689	2	1	120	GE3	3	Crus1	LCrus1	Lateral	2	4
f	0	19	7	79.0555	2	1	120	GE3	3	Crus1	LCrus1	Lateral	2	4
m	1	6	2	17.5745	2	1	120	GE3	2	crus1	Lcrus1	Lateral	2	4
m	1	7	3	39.1135	2	1	120	GE3	3	crus1	Lcrus1	Lateral	2	4
m	1	7	4	43.4674	2	1	120	GE3	3	crus1	Lcrus1	Lateral	2	4
m	1	8	190923a_1809		2	1	120	GE3	3	crus1	Lcrus1	Lateral	2	4
m	1	8	2		2	1	120	GE3	3	crus1	Lcrus1	Lateral	2	4
m	1	9	3	70.734	2	1	120	GE3	3	crus1	Lcrus1	Lateral	2	4
f	0	14	5	111.37	3	1	210	GE4	3	crus1	Lcrus1	Lateral	2	4
f	0	15	5	13.259	3	1	210	GE4	3	crus1	Lcrus1	Lateral	2	4
f	0	27	200127a_2035	31.904	3	1	210	GE4	3	crus1	Lcrus1	Lateral	2	4
f	0	28	5	56.1465	3	1	210	GE4	3	crus1	Lcrus1	Lateral	2	4
m	1	17	3	28.0359	3	1	210	GE4	2	crus1	Lcrus1	Lateral	2	4
m	1	17	4	65.4818	3	1	210	GE4	2	crus1	Lcrus1	Lateral	2	4
m	1	29		54.1941	3	1	210	GE4	3	crus1	lCrus1	Lateral	2	4
f	0	23		47.4078	4	1	400	GE1	3	Crus1	LCrus1	Lateral	2	4
f	0	24	5		4	1	400	GE1	3	Crus1	LCrus1	Lateral	2	4
f	0	24	6	113.63	4	1	400	GE1	3	Crus1	LCrus1	Lateral	2	4
f	0	25	4	119.763	4	1	400	GE1	3	Crus1	LCrus1	Lateral	2	4
m	1	20	5	16.2105	4	1	400	GE1	3	Crus1	LCrus1	Lateral	2	4
m	1	21	4	119.131	4	1	400	GE1	3	Crus1	LCrus1	Lateral	2	4
m	1	21	5		4	1	400	GE1	3	Crus1	LCrus1	Lateral	2	4
m	1	22	6	68.3094	4	1	400	GE1	3	crus1	Lcrus1	Lateral	2	4
m	1	22	7	22.4211	4	1	400	GE1	3	crus1	Lcrus1	Lateral	2	4
f	0	2	190409b_1385	48.6082	1	2	45	GE2	3	crus1	Lcrus1	Lateral	2	4
f	0	2	2	47.3426	1	2	45	GE2	3	crus1	Lcrus1	Lateral	2	4
f	0	7	4	12.033	1	2	45	GE2	3	crus1	Lcrus1	Lateral	2	4
f	0	22		29.8821	1	2	45	GE2	3	Crus1	LCrus1	Lateral	2	4
f	0	22		47.1882	1	2	45	GE2	3	Crus1	LCrus1	Lateral	2	4
m	1	3	4	11.2903	1	2	45	GE2	2	crus1	Lcrus1	Lateral	2	4
m	1	3	5	41.3468	1	2	45	GE2	2	crus1	Lcrus1	Lateral	2	4
m	1	3	6	39.0843	1	2	45	GE2	2	crus1	Lcrus1	Lateral	2	4
m	1	4	6	75.4923	1	2	45	GE2	2	crus1	Lcrus1	Lateral	2	4
m	1	4	7	12.281	1	2	45	GE2	2	crus1	Lcrus1	Lateral	2	4
m	1	5	2	44.6234	1	2	45	GE2	2	crus1	Lcrus1	Lateral	2	4
m	1	5	3	24.0202	1	2	45	GE2	2	crus1	Lcrus1	Lateral	2	4
m	1	5	4	138.385	1	2	45	GE2	2	crus1	Lcrus1	Lateral	2	4
m	1	6	190612a_1729	52.8432	1	2	45	GE2	3	crus1	Lcrus1	Lateral	2	4
f	0	8	3	20.15	2	2	120	GE3	3	crus1	Lcrus1	Lateral	2	4
f	0	10	190823a_1670	24.4024	2	2	120	GE3	3	crus1	Lcrus1	Lateral	2	4
f	0	12	2	31.4945	2	2	120	GE3	3	crus1	Lcrus1	Lateral	2	4
f	0	12	3	30.623	2	2	120	GE3	3	crus1	Lcrus1	Lateral	2	4
m	1	9	190812a_1657	25.242	2	2	120	GE3	2	crus1	Lcrus1	Lateral	2	4
m	1	13	5	28.3044	2	2	120	GE3	2	crus1	Lcrus1	Lateral	2	4
m	1	14	4	41.8718	2	2	120	GE3	3	crus1	Lcrus1	Lateral	2	4
m	1	19		21.1551	2	2	120	GE3	3	Crus1	LCrus1	Lateral	2	4
m	1	17	6	28.458	3	2	210	GE4	3	Crus1	LCrus1	Lateral	2	4
m	1	17	7	24.8843	3	2	210	GE4	3	Crus1	LCrus1	Lateral	2	4
m	1	20		44.9935	3	2	210	GE4	3	crus1	Lcrus1	Lateral	2	4
m	1	21		79.2132	3	2	210	GE4	3	crus1	Lcrus1	Lateral	2	4
f	0	16		8.75654	4	2	400	GE1	3	Crus1	LCrus1	Lateral	2	4
m	1	18	2	53.7558	4	2	400	GE1	3	crus1	Lcrus1	Lateral	2	4
m	1	18	3	38.8734	4	2	400	GE1	3	crus1	Lcrus1	Lateral	2	4
m	1	23		60.227	4	2	400	GE1	3	crus1	Lcrus1	Lateral	2	4
m	1	23		2.94602	4	2	400	GE1	3	crus1	Lcrus1	Lateral	2	4
f	0	15		87.0726	1	3	45	GE2	3	crus1	Lcrus1	Lateral	2	4
f	0	17		10.4547	1	3	45	GE2	3	crus1	Lcrus1	Lateral	2	4
f	0	17			1	3	45	GE2	3	crus1	Lcrus1	Lateral	2	4
f	0	18	5	63.9441	1	3	45	GE2	3	crus1	Lcrus1	Lateral	2	4
m	1	3		57.6156	1	3	45	GE2	3	crus1	Lcrus1	Lateral	2	4
m	1	3		74.3085	1	3	45	GE2	3	crus1	Lcrus1	Lateral	2	4
m	1	9	200227_2573	56.0466	1	3	45	GE2	3	Crus1	LCrus1	Lateral	2	4
m	1	10	5	26.9511	1	3	45	GE2	3	Crus1	LCrus1	Lateral	2	4
f	0	1	3		2	3	120	GE3	3	Crus1	LCrus1	Lateral	2	4
f	0	1	4	95.501	2	3	120	GE3	3	Crus1	LCrus1	Lateral	2	4
m	1	5		4.92941	2	3	120	GE3	3	crus1	Lcrus1	Lateral	2	4
m	1	6		55.0108	2	3	120	GE3	3	crus1	Lcrus1	Lateral	2	4
m	1	6		2.62807	2	3	120	GE3	3	crus1	Lcrus1	Lateral	2	4
m	1	19	200429_2563	55.0021	2	3	120	GE3	3	crus1	Lcrus1	Lateral	2	4
m	1	23			2	3	120	GE3	3	crus1	Lcrus1	Lateral	2	4
f	0	16	6	27.0783	3	3	210	GE4	3	crus1	Lcrus1	Lateral	2	4
f	0	21	6	77.248	3	3	210	GE4	3	crus1	Lcrus1	Lateral	2	4
m	1	4			3	3	210	GE4	3	crus1	Lcrus1	Lateral	2	4
f	0	13		49.2423	4	3	400	GE1	3	crus1	Lcrus1	Lateral	2	4
f	0	13		35.9252	4	3	400	GE1	3	crus1	Lcrus1	Lateral	2	4
f	0	14		32.5634	4	3	400	GE1	3	crus1	Lcrus1	Lateral	2	4
f	0	25	3	69.2981	4	3	400	GE1	3	crus1	Lcrus1	Lateral	2	4
f	0	25	4	66.9468	4	3	400	GE1	3	crus1	Lcrus1	Lateral	2	4
m	1	12		32.1353	4	3	400	GE1	3	crus1	Lcrus1	Lateral	2	4
m	1	22		121.834	4	3	400	GE1	3	crus1	Lcrus1	Lateral	2	4
m	1	22		69.507	4	3	400	GE1	3	crus1	Lcrus1	Lateral	2	4
m	1	24		54.5288	4	3	400	GE1	3	crus1	Lcrus1	Lateral	2	4
m	1	26	6	43.5043	4	3	400	GE1	2	crus1	Lcrus1	Lateral	2	4
m	1	26	7	64.8656	4	3	400	GE1	2	crus1	Lcrus1	Lateral	2	4
f	0	2	5	196.372	1	4	45	GE2	3	crus1	Lcrus1	Lateral	2	4
f	0	2	6	22.5236	1	4	45	GE2	3	crus1	Lcrus1	Lateral	2	4
f	0	2	7		1	4	45	GE2	3	crus1	Lcrus1		#N/A	4
f	0	2	8	11.1587	1	4	45	GE2	3	crus1	Lcrus1	Lateral	2	4
f	0	2	9		1	4	45	GE2	3	crus1	Lcrus1		#N/A	4
f	0	4	4	51.787	1	4	45	GE2	3	crus1	Lcrus1	Lateral	2	4
f	0	5	5	37.9885	1	4	45	GE2	3	crus1	Lcrus1	Lateral	2	4
f	0	6	4	45.6368	1	4	45	GE2	3	crus1	Lcrus1	Lateral	2	4
m	1	1	8	76.3546	1	4	45	GE2	4	crus1	Lcrus1	Lateral	2	4
m	1	3	4	94.9223	1	4	45	GE2	3	crus1	Lcrus1	Lateral	2	4
m	1	3	5	31.1142	1	4	45	GE2	3	crus1	Lcrus1	Lateral	2	4
m	1	7	3	31.5277	1	4	45	GE2	3	crus1	Lcrus1	Lateral	2	4
m	1	8	3	14.3771	1	4	45	GE2	3	crus1	Lcrus1	Lateral	2	4
m	1	8	4	55.297	1	4	45	GE2	3	crus1	Lcrus1	Lateral	2	4
f	0	10	3	102.039	2	4	120	GE3	3	crus1	Lcrus1	Lateral	2	4
f	0	10	4	84.3288	2	4	120	GE3	3	crus1	Lcrus1	Lateral	2	4
f	0	14	2	19.9639	2	4	120	GE3	3	crus1	Lcrus1	Lateral	2	4
f	0	15	190822a_1725	30.5312	2	4	120	GE3	3	crus1	Lcrus1	Lateral	2	4
m	1	11	2		2	4	120	GE3	2	crus1	Lcrus1		#N/A	4
m	1	11	3	111.373	2	4	120	GE3	2	crus1	Lcrus1	Lateral	2	4
m	1	12	190809a_1638	44.6036	2	4	120	GE3	2	crus1	Lcrus1	Lateral	2	4
m	1	12	2	19.2633	2	4	120	GE3	2	crus1	Lcrus1	Lateral	2	4
m	1	13	5		2	4	120	GE3	3	crus1	Lcrus1		#N/A	4
m	1	13	6		2	4	120	GE3	3	crus1	Lcrus1		#N/A	4
m	1	16	5		2	4	120	GE3	3	crus1	Lcrus1		#N/A	4
m	1	16	6	11.4502	2	4	120	GE3	3	crus1	Lcrus1	Lateral	2	4
m	1	17	4	215.56	3	4	210	GE4	3	crus1	Lcrus1	Lateral	2	4
m	1	17	5	39.7027	3	4	210	GE4	3	crus1	Lcrus1	Lateral	2	4
m	1	22	191111a_1642	44.2391	3	4	210	GE4	3	crus1	Lcrus1	Lateral	2	4
m	1	22	2	32.0237	3	4	210	GE4	3	crus1	Lcrus1	Lateral	2	4
f	0	25	4	30.8428	4	4	400	GE1	3	Crus1	LCrus1	Lateral	2	4
f	0	26	4	38.7692	4	4	400	GE1	3	crus1	Lcrus1	Lateral	2	4
f	0	27	4	30.7565	4	4	400	GE1	3	crus1	Lcrus1	Lateral	2	4
m	1	28	4	72.7196	4	4	400	GE1	3	crus1	Lcrus1	Lateral	2	4
m	1	29	2	75.032	4	4	400	GE1	3	crus1	Lcrus1	Lateral	2	4
m	1	1	191119_1665	9.19015	3	5	210	GE4	3	crus1	Lcrus1	Lateral	2	4
f	0	6	5		4	5	400	GE1	3	crus1	Lcrus1	Lateral	2	4
f	0	6	6		4	5	400	GE1	3	crus1	Lcrus1	Lateral	2	4
f	0	8	6		4	5	400	GE1	3	crus1	Lcrus1	Lateral	2	4
f	0	9	200102a_1002	7.03289	4	5	400	GE1	3	Crus1	LCrus1	Lateral	2	4
m	1	3	2		4	5	400	GE1	2	crus1	Lcrus1	Lateral	2	4
m	1	4	3	3.62735	4	5	400	GE1	3	crus1	Lcrus1	Lateral	2	4
m	1	5	2		4	5	400	GE1	3	Crus1	LCrus1	Lateral	2	4
m	1	5	3	102.902	4	5	400	GE1	3	Crus1	LCrus1	Lateral	2	4
m	1	7	6	171.792	4	5	400	GE1	3	Crus1	LCrus1	Lateral	2	4
m	1	7	7	85.1991	4	5	400	GE1	3	crus1	Lcrus1	Lateral	2	4
m	1	10	2	120.911	4	5	400	GE1	3	crus1	Lcrus1	Lateral	2	4
m	1	10	3	15.5713	4	5	400	GE1	3	crus1	Lcrus1	Lateral	2	4
f	0	3	4	55.561	1	1	45	GE2	3	crus2	Lcrus2	Lateral	2	5
f	0	4	3	119.624	1	1	45	GE2	2	crus2	Lcrus2	Lateral	2	5
f	0	4	4		1	1	45	GE2	2	crus2	Lcrus2	Lateral	2	5
f	0	12	2		1	1	45	GE2	3	crus2	Lcrus2	Lateral	2	5
f	0	12	3	13.6879	1	1	45	GE2	3	crus2	Lcrus2	Lateral	2	5
f	0	13	4	96.7454	1	1	45	GE2	3	crus2	Lcrus2	Lateral	2	5
f	0	13	5		1	1	45	GE2	3	crus2	Lcrus2	Lateral	2	5
m	1	1	4	40.0355	1	1	45	GE2	3	crus2	Lcrus2	Lateral	2	5
m	1	1	5	132.153	1	1	45	GE2	3	crus2	Lcrus2	Lateral	2	5
m	1	1	6	118.949	1	1	45	GE2	3	crus2	Lcrus2	Lateral	2	5
m	1	2	2	66.3637	1	1	45	GE2	4	crus2	Lcrus2	Lateral	2	5
m	1	5	3	25.2463	1	1	45	GE2	3	crus2	Lcrus2	Lateral	2	5
m	1	5	4	92.0211	1	1	45	GE2	3	crus2	Lcrus2	Lateral	2	5
f	0	11	2		2	1	120	GE3	3	crus2	Lcrus2	Lateral	2	5
f	0	19	4	13.4301	2	1	120	GE3	3	Crus2	LCrus2	Lateral	2	5
f	0	19	5	188.187	2	1	120	GE3	3	Crus2	LCrus2	Lateral	2	5
m	1	6	190819b_1709	24.0957	2	1	120	GE3	2	crus2	Lcrus2	Lateral	2	5
m	1	7	2	41.8911	2	1	120	GE3	3	crus2	Lcrus2	Lateral	2	5
m	1	8	3	122.251	2	1	120	GE3	3	crus2	Lcrus2	Lateral	2	5
m	1	9	4	79.8069	2	1	120	GE3	3	crus2	Lcrus2	Lateral	2	5
f	0	14	4		3	1	210	GE4	3	crus2	Lcrus2	Lateral	2	5
f	0	27		8.36283	3	1	210	GE4	3	crus2	Lcrus2	Lateral	2	5
f	0	28	6	105.961	3	1	210	GE4	3	crus2	Lcrus2	Lateral	2	5
m	1	16	2	147.294	3	1	210	GE4	2	crus2	Lcrus2	Lateral	2	5
m	1	16	3	67.4823	3	1	210	GE4	2	crus2	Lcrus2	Lateral	2	5
m	1	17	5	36.0077	3	1	210	GE4	2	crus2	Lcrus2	Lateral	2	5
m	1	17	6		3	1	210	GE4	2	crus2	Lcrus2	Lateral	2	5
m	1	29			3	1	210	GE4	3		lCrus2	Lateral	2	5
m	1	29			3	1	210	GE4	3		lCrus2	Lateral	2	5
f	0	23			4	1	400	GE1	3	Crus2	LCrus2	Lateral	2	5
f	0	24	4		4	1	400	GE1	3	Crus2	LCrus2	Lateral	2	5
m	1	20	6	192.398	4	1	400	GE1	3	Crus2	LCrus2	Lateral	2	5
m	1	22	8	98.3149	4	1	400	GE1	3	crus2	Lcrus2	Lateral	2	5
f	0	22		81.3886	1	2	45	GE2	3	Crus2	LCrus2	Lateral	2	5
f	0	22		63.57	1	2	45	GE2	3	Crus2	LCrus2	Lateral	2	5
m	1	3	190411a_1412	52.1713	1	2	45	GE2	2	crus2	Lcrus2	Lateral	2	5
m	1	3	2	30.04	1	2	45	GE2	2	crus2	Lcrus2	Lateral	2	5
m	1	3	3	24.8622	1	2	45	GE2	2	crus2	Lcrus2	Lateral	2	5
m	1	4	3	12.8978	1	2	45	GE2	2	crus2	Lcrus2	Lateral	2	5
m	1	4	4	4.65377	1	2	45	GE2	2	crus2	Lcrus2	Lateral	2	5
m	1	5	5	73.6182	1	2	45	GE2	2	crus2	Lcrus2	Lateral	2	5
m	1	5	6	27.1413	1	2	45	GE2	2	crus2	Lcrus2	Lateral	2	5
m	1	6	2	51.9887	1	2	45	GE2	3	crus2	Lcrus2	Lateral	2	5
f	0	8	4	24.7092	2	2	120	GE3	3	crus2	Lcrus2	Lateral	2	5
f	0	10		64.6242	2	2	120	GE3	3	crus2	Lcrus2	Lateral	2	5
f	0	11	190823b_1671	58.249	2	2	120	GE3	3	crus2	Lcrus2	Lateral	2	5
f	0	12	4	63.8363	2	2	120	GE3	3	crus2	Lcrus2	Lateral	2	5
f	0	12	5	106.383	2	2	120	GE3	3	crus2	Lcrus2	Lateral	2	5
m	1	13	6	103.568	2	2	120	GE3	2	crus2	Lcrus2	Lateral	2	5
m	1	14	2	56.2824	2	2	120	GE3	3	crus2	Lcrus2	Lateral	2	5
m	1	14	3	47.0978	2	2	120	GE3	3	crus2	Lcrus2	Lateral	2	5
m	1	19		20.5459	2	2	120	GE3	3	Crus2	LCrus2	Lateral	2	5
m	1	19		5.70773	2	2	120	GE3	3	Crus2	LCrus2	Lateral	2	5
f	0	15	2	79.455	3	2	210	GE4	2	crus2	Lcrus2	Lateral	2	5
f	0	15	3	39.8467	3	2	210	GE4	2	crus2	Lcrus2	Lateral	2	5
m	1	17	8	50.5401	3	2	210	GE4	3	Crus2	LCrus2	Lateral	2	5
m	1	17	9	50.193	3	2	210	GE4	3	Crus2	LCrus2	Lateral	2	5
m	1	21		84.6014	3	2	210	GE4	3	crus2	Lcrus2	Lateral	2	5
f	0	16		97.5877	4	2	400	GE1	3	Crus2	LCrus2	Lateral	2	5
f	0	16		6.32014	4	2	400	GE1	3	Crus2	LCrus2	Lateral	2	5
m	1	18	4		4	2	400	GE1	3	crus2	Lcrus2	Lateral	2	5
m	1	23		84.8903	4	2	400	GE1	3	crus2	Lcrus2	Lateral	2	5
m	1	23		45.4683	4	2	400	GE1	3	crus2	Lcrus2	Lateral	2	5
f	0	15		130.538	1	3	45	GE2	3	crus2	Lcrus2	Lateral	2	5
f	0	17		46.2024	1	3	45	GE2	3	crus2	Lcrus2	Lateral	2	5
f	0	17		57.8984	1	3	45	GE2	3	crus2	Lcrus2	Lateral	2	5
f	0	18	4	19.0226	1	3	45	GE2	3	crus2	Lcrus2	Lateral	2	5
m	1	3			1	3	45	GE2	3	Crus2	LCrus2	Lateral	2	5
m	1	10	4	141.312	1	3	45	GE2	3	Crus2	LCrus2	Lateral	2	5
f	0	1	2	54.2715	2	3	120	GE3	3	Crus2	LCrus2	Lateral	2	5
m	1	5		59.6773	2	3	120	GE3	3	crus2	Lcrus2	Lateral	2	5
m	1	19			2	3	120	GE3	3	crus2	Lcrus2	Lateral	2	5
m	1	19		29.9209	2	3	120	GE3	3	crus2	Lcrus2	Lateral	2	5
m	1	23		26.101	2	3	120	GE3	3	crus2	Lcrus2	Lateral	2	5
f	0	16	4		3	3	210	GE4	3	crus2	Lcrus2	Lateral	2	5
f	0	16	5	76.2624	3	3	210	GE4	3	crus2	Lcrus2	Lateral	2	5
f	0	20		161.724	3	3	210	GE4	3	crus2	Lcrus2	Lateral	2	5
f	0	20		24.1334	3	3	210	GE4	2	crus2	Lcrus2	Lateral	2	5
f	0	21	4		3	3	210	GE4	3	crus2	Lcrus2	Lateral	2	5
f	0	21	5	197.087	3	3	210	GE4	3	crus2	Lcrus2	Lateral	2	5
m	1	4		127.614	3	3	210	GE4	3	crus2	Lcrus2	Lateral	2	5
f	0	13		61.0818	4	3	400	GE1	3	crus2	Lcrus2	Lateral	2	5
f	0	25	5	120.232	4	3	400	GE1	3	crus2	Lcrus2	Lateral	2	5
m	1	12		153.637	4	3	400	GE1	3	crus2	Lcrus2	Lateral	2	5
m	1	12		121.186	4	3	400	GE1	3	crus2	Lcrus2	Lateral	2	5
m	1	22		40.1187	4	3	400	GE1	3	crus2	Lcrus2	Lateral	2	5
m	1	24		129.153	4	3	400	GE1	3	crus2	Lcrus2	Lateral	2	5
m	1	26	8	71.7283	4	3	400	GE1	2	crus2	Lcrus2	Lateral	2	5
m	1	26	9		4	3	400	GE1	2	crus2	Lcrus2	Lateral	2	5
f	0	2	10	116.485	1	4	45	GE2	3	crus2	Lcrus2	Lateral	2	5
f	0	2	11	70.479	1	4	45	GE2	3	crus2	Lcrus2	Lateral	2	5
f	0	2	12	127.514	1	4	45	GE2	3	crus2	Lcrus2	Lateral	2	5
f	0	2	13		1	4	45	GE2	3	crus2	Lcrus2		#N/A	5
f	0	4	2	64.5321	1	4	45	GE2	3	crus2	Lcrus2	Lateral	2	5
f	0	4	3	96.0679	1	4	45	GE2	3	crus2	Lcrus2	Lateral	2	5
f	0	5	2	29.3133	1	4	45	GE2	3	crus2	Lcrus2	Lateral	2	5
f	0	5	3	115.418	1	4	45	GE2	3	crus2	Lcrus2	Lateral	2	5
f	0	5	4	61.6739	1	4	45	GE2	3	crus2	Lcrus2	Lateral	2	5
f	0	6	2	26.4004	1	4	45	GE2	3	crus2	Lcrus2	Lateral	2	5
f	0	6	3	58.7679	1	4	45	GE2	3	crus2	Lcrus2	Lateral	2	5
m	1	1	4	51.3844	1	4	45	GE2	4	crus2	Lcrus2	Lateral	2	5
m	1	1	5	139.302	1	4	45	GE2	4	crus2	Lcrus2	Lateral	2	5
m	1	1	6	94.5099	1	4	45	GE2	4	crus2	Lcrus2	Lateral	2	5
m	1	1	7	29.4896	1	4	45	GE2	4	crus2	Lcrus2	Lateral	2	5
m	1	3	2		1	4	45	GE2	3	crus2	Lcrus2		#N/A	5
m	1	3	3		1	4	45	GE2	3	crus2	Lcrus2		#N/A	5
m	1	7	190619a_1756	19.7463	1	4	45	GE2	3	crus2	Lcrus2	Lateral	2	5
m	1	7	2	91.7583	1	4	45	GE2	3	crus2	Lcrus2	Lateral	2	5
m	1	8	5	185.334	1	4	45	GE2	3	crus2	Lcrus2	Lateral	2	5
m	1	8	6	13.392	1	4	45	GE2	3	crus2	Lcrus2	Lateral	2	5
f	0	10	5		2	4	120	GE3	3	crus2	Lcrus2		#N/A	5
f	0	10	6	78.5927	2	4	120	GE3	3	crus2	Lcrus2	Lateral	2	5
f	0	14	3	82.3753	2	4	120	GE3	3	crus2	Lcrus2	Lateral	2	5
f	0	14	4	81.8216	2	4	120	GE3	3	crus2	Lcrus2	Lateral	2	5
f	0	14	5	31.7221	2	4	120	GE3	3	crus2	Lcrus2	Lateral	2	5
m	1	11	4	48.1324	2	4	120	GE3	2	crus2	Lcrus2	Lateral	2	5
m	1	11	5		2	4	120	GE3	2	crus2	Lcrus2		#N/A	5
m	1	11	6	92.8383	2	4	120	GE3	2	crus2	Lcrus2	Lateral	2	5
m	1	12	3	175.487	2	4	120	GE3	2	crus2	Lcrus2	Lateral	2	5
m	1	13	3	130.165	2	4	120	GE3	3	crus2	Lcrus2	Lateral	2	5
m	1	13	4	135.075	2	4	120	GE3	3	crus2	Lcrus2	Lateral	2	5
m	1	16	3	65.5769	2	4	120	GE3	3	crus2	Lcrus2	Lateral	2	5
m	1	16	4		2	4	120	GE3	3	crus2	Lcrus2		#N/A	5
f	0	20	191031_1616	49.4312	3	4	210	GE4	2	crus2	Lcrus2	Lateral	2	5
f	0	20	3	160.27	3	4	210	GE4	2	crus2	Lcrus2	Lateral	2	5
f	0	20	4	160.337	3	4	210	GE4	2	crus2	Lcrus2	Lateral	2	5
f	0	23	2	8.87904	3	4	210	GE4	3	crus2	Lcrus2	Lateral	2	5
m	1	17	6	143.594	3	4	210	GE4	3	crus2	Lcrus2	Lateral	2	5
m	1	18	191004b_1447	4.79366	3	4	210	GE4	3	crus2	Lcrus2	Lateral	2	5
m	1	18	2	6.84153	3	4	210	GE4	3	crus2	Lcrus2	Lateral	2	5
m	1	18	3	70.963	3	4	210	GE4	3	crus2	Lcrus2	Lateral	2	5
m	1	18	4	109.244	3	4	210	GE4	3	crus2	Lcrus2	Lateral	2	5
f	0	25	3	33.9609	4	4	400	GE1	3	Crus2	LCrus2	Lateral	2	5
f	0	26	3	38.7821	4	4	400	GE1	3	Crus2	LCrus2	Lateral	2	5
f	0	27	3	119.169	4	4	400	GE1	3	Crus2	LCrus2	Lateral	2	5
m	1	28	6	81.9634	4	4	400	GE1	3	crus2	Lcrus2	Lateral	2	5
m	1	29	3	92.6364	4	4	400	GE1	3	crus2	Lcrus2	Lateral	2	5
m	1	30	4	81.3821	4	4	400	GE1	3	Crus2	LCrus2	Lateral	2	5
m	1	1	2	41.8605	3	5	210	GE4	3	crus2	Lcrus2	Lateral	2	5
m	1	1	3	103.113	3	5	210	GE4	3	crus2	Lcrus2	Lateral	2	5
f	0	6	7	143.39	4	5	400	GE1	3	Crus2	LCrus2	Lateral	2	5
m	1	4	2	52.1435	4	5	400	GE1	3	Crus2	LCrus2	Lateral	2	5
m	1	5	4		4	5	400	GE1	3	Crus2	LCrus2	Lateral	2	5
m	1	5	5		4	5	400	GE1	3	Crus2	LCrus2	Lateral	2	5
m	1	7	3	130.886	4	5	400	GE1	3	Crus2	LCrus2	Lateral	2	5
m	1	7	4	68.3764	4	5	400	GE1	3	Crus2	LCrus2	Lateral	2	5
m	1	7	5		4	5	400	GE1	3	crus2	Lcrus2	Lateral	2	5
f	0	3	5	20.4295	1	1	45	GE2	3	pm	Lpm	Lateral	2	6
f	0	4	190416_1374	93.0629	1	1	45	GE2	2	pm	Lpm	Lateral	2	6
f	0	4	2	98.1638	1	1	45	GE2	2	pm	Lpm	Lateral	2	6
f	0	12	4		1	1	45	GE2	3	pm	Lpm	Lateral	2	6
m	1	1	190114_1011	11.2297	1	1	45	GE2	3	pm	Lpm	Lateral	2	6
m	1	1	2	8.30312	1	1	45	GE2	3	pm	Lpm	Lateral	2	6
m	1	1	3	19.0321	1	1	45	GE2	3	pm	Lpm	Lateral	2	6
m	1	2	190115_1012	5.54871	1	1	45	GE2	4	pm	Lpm	Lateral	2	6
m	1	5	2	86.7827	1	1	45	GE2	3	pm	Lpm	Lateral	2	6
f	0	11	3	167.808	2	1	120	GE3	3	pm	Lpm	Lateral	2	6
f	0	19	2		2	1	120	GE3	3	PM	LPM	Lateral	2	6
f	0	19	3		2	1	120	GE3	3	PM	LPM	Lateral	2	6
m	1	7	190920a_1820	67.4344	2	1	120	GE3	3	pm	Lpm	Lateral	2	6
m	1	9	5	12.2567	2	1	120	GE3	3	pm	Lpm	Lateral	2	6
m	1	9	6	80.8369	2	1	120	GE3	3	pm	Lpm	Lateral	2	6
f	0	14	6	75.5023	3	1	210	GE4	3	pm	Lpm	Lateral	2	6
f	0	15	3	19.5618	3	1	210	GE4	3	pm	Lpm	Lateral	2	6
f	0	28	7	131.966	3	1	210	GE4	3	PM	LPM	Lateral	2	6
f	0	24	2	133.821	4	1	400	GE1	3	PM	LPM	Lateral	2	6
f	0	24	3	52.3828	4	1	400	GE1	3	PM	LPM	Lateral	2	6
f	0	25	5	68.0685	4	1	400	GE1	3	PM	LPM	Lateral	2	6
m	1	20	7	87.9727	4	1	400	GE1	3	PM	LPM	Lateral	2	6
m	1	20	8	77.0467	4	1	400	GE1	3	PM	LPM	Lateral	2	6
f	0	1	3	53.9382	1	2	45	GE2	3	pm	Lpm	Lateral	2	6
m	1	4	190412a_1413	40.4223	1	2	45	GE2	2	pm	Lpm	Lateral	2	6
m	1	4	2	106.826	1	2	45	GE2	2	pm	Lpm	Lateral	2	6
m	1	6	3	43.2865	1	2	45	GE2	3	pm	Lpm	Lateral	2	6
f	0	8	5	29.9914	2	2	120	GE3	3	pm	Lpm	Lateral	2	6
f	0	11		18.8668	2	2	120	GE3	3	pm	Lpm	Lateral	2	6
f	0	12	6	67.734	2	2	120	GE3	3	pm	Lpm	Lateral	2	6
m	1	13	7	146.7	2	2	120	GE3	2	pm	Lpm	Lateral	2	6
m	1	13	8	114.325	2	2	120	GE3	2	pm	Lpm	Lateral	2	6
m	1	14	191008_1874	44.0673	2	2	120	GE3	3	pm	Lpm	Lateral	2	6
m	1	19		74.1045	2	2	120	GE3	3	PM	LPM	Lateral	2	6
m	1	17	10	39.897	3	2	210	GE4	3	PM	LPM	Lateral	2	6
m	1	17	11	110.189	3	2	210	GE4	3	PM	LPM	Lateral	2	6
m	1	20		35.7318	3	2	210	GE4	3	PM	LPM	Lateral	2	6
m	1	21		75.9467	3	2	210	GE4	3	PM	LPM	Lateral	2	6
f	0	16		35.0095	4	2	400	GE1	3	PM	LPM	Lateral	2	6
m	1	18	5	61.4354	4	2	400	GE1	3	PM	LPM	Lateral	2	6
f	0	17		101.009	1	3	45	GE2	3	pm	Lpm	Lateral	2	6
f	0	18	2		1	3	45	GE2	3	pm	Lpm	Lateral	2	6
f	0	18	3	74.6208	1	3	45	GE2	3	pm	Lpm	Lateral	2	6
m	1	3		84.1536	1	3	45	GE2	3	PM	LPM	Lateral	2	6
m	1	10	3	48.7332	1	3	45	GE2	3	PM	LPM	Lateral	2	6
m	1	5			2	3	120	GE3	3	PM	LPM	Lateral	2	6
m	1	7		95.3194	2	3	120	GE3	3	PM	LPM	Lateral	2	6
m	1	4		21.2624	3	3	210	GE4	3	PM	LPM	Lateral	2	6
m	1	8		70.999	3	3	210	GE4	3	PM	LPM	Lateral	2	6
m	1	11	3		3	3	210	GE4	3	Pm	LPm	Lateral	2	6
f	0	13		107.162	4	3	400	GE1	3	pm	Lpm	Lateral	2	6
f	0	25	6	11.1212	4	3	400	GE1	3	pm	Lpm	Lateral	2	6
m	1	12			4	3	400	GE1	3	pm	Lpm	Lateral	2	6
m	1	12		68.6708	4	3	400	GE1	3	pm	Lpm	Lateral	2	6
m	1	22		109.973	4	3	400	GE1	3	pm	Lpm	Lateral	2	6
m	1	26	10	16.7948	4	3	400	GE1	2	pm	Lpm	Lateral	2	6
f	0	2	14	65.4747	1	4	45	GE2	3	pm	Lpm	Lateral	2	6
f	0	5	190611a_1726	99.7458	1	4	45	GE2	3	pm	Lpm	Lateral	2	6
f	0	6	190612b_1760	63.0735	1	4	45	GE2	3	pm	Lpm	Lateral	2	6
m	1	1	3	26.1591	1	4	45	GE2	4	pm	Lpm	Lateral	2	6
m	1	3	190422_1445		1	4	45	GE2	3	pm	Lpm		#N/A	6
f	0	9	190725a_1569	54.9223	2	4	120	GE3	3	pm	Lpm	Lateral	2	6
f	0	14	6	106.712	2	4	120	GE3	3	pm	Lpm	Lateral	2	6
m	1	13	190819a_1706	92.8735	2	4	120	GE3	3	pm	Lpm	Lateral	2	6
m	1	13	2	49.5277	2	4	120	GE3	3	pm	Lpm	Lateral	2	6
m	1	16	190903_1735	101.73	2	4	120	GE3	3	pm	Lpm	Lateral	2	6
m	1	16	2		2	4	120	GE3	3	pm	Lpm		#N/A	6
f	0	23	191111b_1645	33.7928	3	4	210	GE4	3	pm	Lpm	Lateral	2	6
m	1	17	7	29.7527	3	4	210	GE4	3	pm	Lpm	Lateral	2	6
f	0	27	2	93.5115	4	4	400	GE1	3	PM	LPM	Lateral	2	6
m	1	30	3		4	4	400	GE1	3	PM	LPM		#N/A	6
f	0	6	8	35.8217	4	5	400	GE1	3	PM	LPM	Lateral	2	6
f	0	8	7	127.15	4	5	400	GE1	3	PM	LPM	Lateral	2	6
f	0	4	15	94.7523	1	1	45	GE2	6	sim	isim	IntPosterior	4	7
f	0	13	7	75.0423	1	1	45	GE2	6	sim	isim	IntPosterior	4	7
m	1	2	14	83.1875	1	1	45	GE2	8	sim	isim	IntPosterior	4	7
m	1	5	7	67.27	1	1	45	GE2	6	sim	isim	IntPosterior	4	7
m	1	5	8	55.0763	1	1	45	GE2	6	sim	isim	IntPosterior	4	7
m	1	5	9	28.0163	1	1	45	GE2	6	sim	isim	IntPosterior	4	7
f	0	11	5	19.3518	2	1	120	GE3	6	sim	isim	IntPosterior	4	7
f	0	19	11		2	1	120	GE3	6	Sim	iSim	IntPosterior	4	7
m	1	7	11	80.5286	2	1	120	GE3	7	sim	isim	IntPosterior	4	7
f	0	14	8	68.9101	3	1	210	GE4	6	sim	isim	IntPosterior	4	7
f	0	15	9	86.0449	3	1	210	GE4	6	sim	isim	IntPosterior	4	7
f	0	28	8	126.94	3	1	210	GE4	6	sim	isim	IntPosterior	4	7
m	1	16	4	56.9389	3	1	210	GE4	6	sim	isim	IntPosterior	4	7
m	1	17	11	96.6615	3	1	210	GE4	6	sim	isim	IntPosterior	4	7
m	1	29		136.559	3	1	210	GE4	6		iSim	IntPosterior	4	7
f	0	23		9.58353	4	1	400	GE1	6	Sim	iSim	IntPosterior	4	7
f	0	24	12	4.94433	4	1	400	GE1	6	Sim	iSim	IntPosterior	4	7
f	0	26	4	10.8124	4	1	400	GE1	6	sim	isim	IntPosterior	4	7
f	0	26	5	81.3608	4	1	400	GE1	6	sim	isim	IntPosterior	4	7
m	1	20	9	76.5823	4	1	400	GE1	6	Sim	iSim	IntPosterior	4	7
m	1	21	9	53.294	4	1	400	GE1	6	sim	isim	IntPosterior	4	7
m	1	22	9	69.3225	4	1	400	GE1	6	sim	isim	IntPosterior	4	7
f	0	1	6	24.9691	1	2	45	GE2	6	sim	isim	IntPosterior	4	7
f	0	2	10	120.592	1	2	45	GE2	6	sim	isim	IntPosterior	4	7
f	0	2	11	49.1994	1	2	45	GE2	6	sim	isim	IntPosterior	4	7
f	0	2	12	58.3281	1	2	45	GE2	6	sim	isim	IntPosterior	4	7
f	0	2	13	17.3159	1	2	45	GE2	6	sim	isim	IntPosterior	4	7
f	0	2	14	76.4201	1	2	45	GE2	6	sim	isim	IntPosterior	4	7
f	0	7	6	10.5227	1	2	45	GE2	6	sim	isim	IntPosterior	4	7
f	0	7	7	128.308	1	2	45	GE2	6	sim	isim	IntPosterior	4	7
f	0	7	8	50.918	1	2	45	GE2	6	sim	isim	IntPosterior	4	7
f	0	22		43.6505	1	2	45	GE2	7	sim	isim	IntPosterior	4	7
m	1	4	9	55.2687	1	2	45	GE2	6	sim	isim	IntPosterior	4	7
m	1	4	10	47.6411	1	2	45	GE2	6	sim	isim	IntPosterior	4	7
m	1	4	11	34.7534	1	2	45	GE2	6	sim	isim	IntPosterior	4	7
m	1	4	12	31.4501	1	2	45	GE2	6	sim	isim	IntPosterior	4	7
m	1	5	10	57.1302	1	2	45	GE2	6	sim	isim	IntPosterior	4	7
m	1	5	11	27.756	1	2	45	GE2	6	sim	isim	IntPosterior	4	7
m	1	5	12	21.0806	1	2	45	GE2	6	sim	isim	IntPosterior	4	7
m	1	6	10	50.6915	1	2	45	GE2	7	sim	isim	IntPosterior	4	7
m	1	6	11	12.1281	1	2	45	GE2	7	sim	isim	IntPosterior	4	7
f	0	8	7	34.7045	2	2	120	GE3	7	sim	isim	IntPosterior	4	7
f	0	8	8	17.3222	2	2	120	GE3	7	sim	isim	IntPosterior	4	7
f	0	10		42.0772	2	2	120	GE3	6	sim	isim	IntPosterior	4	7
f	0	11		56.0984	2	2	120	GE3	7	sim	isim	IntPosterior	4	7
f	0	12	8	25.2423	2	2	120	GE3	5	sim	isim	IntPosterior	4	7
f	0	12	9	51.5305	2	2	120	GE3	5	sim	isim	IntPosterior	4	7
m	1	9	2	60.7605	2	2	120	GE3	6	sim	isim	IntPosterior	4	7
m	1	13	12	24.1716	2	2	120	GE3	6	sim	isim	IntPosterior	4	7
m	1	13	13	75.3022	2	2	120	GE3	6	sim	isim	IntPosterior	4	7
m	1	14	16	43.7757	2	2	120	GE3	6	sim	isim	IntPosterior	4	7
m	1	14	17	45.6323	2	2	120	GE3	6	sim	isim	IntPosterior	4	7
m	1	19		22.0154	2	2	120	GE3	6	Sim	iSim	IntPosterior	4	7
f	0	15	6	32.7829	3	2	210	GE4	6	sim	isim	IntPosterior	4	7
f	0	15	7	118.891	3	2	210	GE4	6	sim	isim	IntPosterior	4	7
m	1	17	13	67.1218	3	2	210	GE4	6	Sim	iSim	IntPosterior	4	7
m	1	20		16.1719	3	2	210	GE4	6	sim	isim	IntPosterior	4	7
m	1	21		49.7198	3	2	210	GE4	6	sim	isim	IntPosterior	4	7
f	0	16			4	2	400	GE1	6	sim	isim	IntPosterior	4	7
f	0	16		46.8276	4	2	400	GE1	6	sim	isim	IntPosterior	4	7
m	1	18	9	41.5417	4	2	400	GE1	7	sim	isim	IntPosterior	4	7
m	1	23		34.1554	4	2	400	GE1	6	sim	isim	IntPosterior	4	7
m	1	23		41.1372	4	2	400	GE1	5	sim	isim	IntPosterior	4	7
f	0	15		128.572	1	3	45	GE2	6	sim	isim	IntPosterior	4	7
f	0	18	8	97.5272	1	3	45	GE2	7	sim	isim	IntPosterior	4	7
f	0	18	9	95.6374	1	3	45	GE2	7	sim	isim	IntPosterior	4	7
m	1	3		15.6286	1	3	45	GE2	6	Sim	iSim	IntPosterior	4	7
m	1	9	4	115.073	1	3	45	GE2	6	sim	isim	IntPosterior	4	7
m	1	5		47.4353	2	3	120	GE3	6	sim	isim	IntPosterior	4	7
m	1	6		43.7083	2	3	120	GE3	6	sim	isim	IntPosterior	4	7
m	1	19		59.1126	2	3	120	GE3	6	sim	isim	IntPosterior	4	7
m	1	23		41.6399	2	3	120	GE3	6	sim	isim	IntPosterior	4	7
m	1	23			2	3	120	GE3	6	sim	isim	IntPosterior	4	7
f	0	20		28.5534	3	3	210	GE4	6	sim	isim	IntPosterior	4	7
f	0	21	7	29.4726	3	3	210	GE4	6	sim	isim	IntPosterior	4	7
f	0	21	8	54.3022	3	3	210	GE4	6	sim	isim	IntPosterior	4	7
m	1	8			3	3	210	GE4	6	sim	isim	IntPosterior	4	7
f	0	25	9	45.0785	4	3	400	GE1	6	sim	isim	IntPosterior	4	7
f	0	25	10	52.6671	4	3	400	GE1	6	sim	isim	IntPosterior	4	7
m	1	12			4	3	400	GE1	6	sim	isim	IntPosterior	4	7
m	1	24		129.521	4	3	400	GE1	6	sim	isim	IntPosterior	4	7
m	1	24		55.4175	4	3	400	GE1	7	sim	isim	IntPosterior	4	7
m	1	26	16	54.8516	4	3	400	GE1	6	sim	isim	IntPosterior	4	7
f	0	2	21	57.1164	1	4	45	GE2	7	sim	isim	IntPosterior	4	7
f	0	2	22	37.7717	1	4	45	GE2	7	sim	isim	IntPosterior	4	7
f	0	4	13	52.9793	1	4	45	GE2	7	sim	isim	IntPosterior	4	7
m	1	1	17	62.9626	1	4	45	GE2	7	sim	isim	IntPosterior	4	7
m	1	1	18	56.1629	1	4	45	GE2	7	sim	isim	IntPosterior	4	7
m	1	1	19	24.788	1	4	45	GE2	7	sim	isim	IntPosterior	4	7
m	1	3	9	137.798	1	4	45	GE2	7	sim	isim	IntPosterior	4	7
m	1	7	5	58.6009	1	4	45	GE2	7	sim	isim	IntPosterior	4	7
m	1	8	15	61.7395	1	4	45	GE2	6	sim	isim	IntPosterior	4	7
m	1	8	16	29.5737	1	4	45	GE2	6	sim	isim	IntPosterior	4	7
f	0	10	11	39.096	2	4	120	GE3	6	sim	isim	IntPosterior	4	7
f	0	14	8	60.6972	2	4	120	GE3	6	sim	isim	IntPosterior	4	7
f	0	19		125.364	3	4	210	GE4	6	sim	isim	IntPosterior	4	7
f	0	20	7	38.4041	3	4	210	GE4	6	sim	isim	IntPosterior	4	7
f	0	21	191101_1575	119.752	3	4	210	GE4	6	sim	isim	IntPosterior	4	7
m	1	17	9	55.9284	3	4	210	GE4	6	sim	isim	IntPosterior	4	7
m	1	18	6	42.9427	3	4	210	GE4	6	sim	isim	IntPosterior	4	7
f	0	24	6	160.727	4	4	400	GE1	5	Sim	iSim	IntPosterior	4	7
f	0	27	7	85.3139	4	4	400	GE1	6	sim	isim	IntPosterior	4	7
m	1	28	7	55.3278	4	4	400	GE1	6	sim	isim	IntPosterior	4	7
m	1	30	8	84.9791	4	4	400	GE1	6	sim	isim	IntPosterior	4	7
m	1	1	7	60.4066	3	5	210	GE4	6	sim	isim	IntPosterior	4	7
f	0	6	9	84.458	4	5	400	GE1	6	sim	isim	IntPosterior	4	7
f	0	8	8	111.755	4	5	400	GE1	6	Sim	iSim	IntPosterior	4	7
m	1	3	5	125.585	4	5	400	GE1	6	sim	isim	IntPosterior	4	7
m	1	4	6	22.1989	4	5	400	GE1	6	sim	isim	IntPosterior	4	7
m	1	5	7	15.0125	4	5	400	GE1	6	sim	isim	IntPosterior	4	7
f	0	3	9	68.6996	1	1	45	GE2	6	crus1	icrus1	IntPosterior	4	8
f	0	4	14	31.2742	1	1	45	GE2	6	crus1	icrus1	IntPosterior	4	8
f	0	13	8	51.0971	1	1	45	GE2	6	crus1	icrus1	IntPosterior	4	8
m	1	5	10	66.1577	1	1	45	GE2	6	crus1	icrus1	IntPosterior	4	8
f	0	11	7		2	1	120	GE3	6	crus1	icrus1	IntPosterior	4	8
f	0	19	12	33.586	2	1	120	GE3	6	Crus1	iCrus1	IntPosterior	4	8
m	1	7	12	129.639	2	1	120	GE3	7	crus1	icrus1	IntPosterior	4	8
m	1	7	13	20.6193	2	1	120	GE3	7	crus1	icrus1	IntPosterior	4	8
m	1	8	6	72.3357	2	1	120	GE3	7	crus1	icrus1	IntPosterior	4	8
m	1	9	11	79.7176	2	1	120	GE3	6	crus1	icrus1	IntPosterior	4	8
f	0	14	9	58.7738	3	1	210	GE4	6	crus1	icrus1	IntPosterior	4	8
f	0	15	8	86.0995	3	1	210	GE4	6	crus1	icrus1	IntPosterior	4	8
f	0	27		151.447	3	1	210	GE4	6	crus1	icrus1	IntPosterior	4	8
f	0	28	9	121.428	3	1	210	GE4	6	crus1	icrus1	IntPosterior	4	8
m	1	16	5		3	1	210	GE4	6	crus1	icrus1	IntPosterior	4	8
m	1	29		93.7591	3	1	210	GE4	6		iCrus1	IntPosterior	4	8
f	0	23		101.675	4	1	400	GE1	6	Crus1	iCrus1	IntPosterior	4	8
f	0	25	8	119.151	4	1	400	GE1	6	Crus1	iCrus1	IntPosterior	4	8
f	0	26	6	31.3598	4	1	400	GE1	6	crus1	icrus1	IntPosterior	4	8
f	0	26	7	84.671	4	1	400	GE1	6	crus1	icrus1	IntPosterior	4	8
m	1	21	8	116.788	4	1	400	GE1	6	crus1	icrus1	IntPosterior	4	8
f	0	22		125.795	1	2	45	GE2	7	Crus1	iCrus1	IntPosterior	4	8
m	1	4	13	31.4086	1	2	45	GE2	6	crus1	icrus1	IntPosterior	4	8
m	1	4	14	51.5667	1	2	45	GE2	6	crus1	icrus1	IntPosterior	4	8
m	1	4	15	78.4261	1	2	45	GE2	6	crus1	icrus1	IntPosterior	4	8
m	1	4	16	50.3933	1	2	45	GE2	6	crus1	icrus1	IntPosterior	4	8
m	1	6	8	64.5048	1	2	45	GE2	7	crus1	icrus1	IntPosterior	4	8
m	1	6	9	52.1051	1	2	45	GE2	7	crus1	icrus1	IntPosterior	4	8
f	0	12	10	76.0032	2	2	120	GE3	5	crus1	icrus1	IntPosterior	4	8
m	1	14	14	28.4308	2	2	120	GE3	6	crus1	icrus1	IntPosterior	4	8
m	1	14	15	64.2566	2	2	120	GE3	6	crus1	icrus1	IntPosterior	4	8
m	1	19		24.9375	2	2	120	GE3	6	Crus1	iCrus1	IntPosterior	4	8
m	1	17	15	25.7996	3	2	210	GE4	6	Crus1	iCrus1	IntPosterior	4	8
m	1	17	16	39.8226	3	2	210	GE4	6	crus1	icrus1	IntPosterior	4	8
m	1	20		40.512	3	2	210	GE4	6	crus1	icrus1	IntPosterior	4	8
m	1	21		25.7773	3	2	210	GE4	6	crus1	icrus1	IntPosterior	4	8
f	0	16		48.5761	4	2	400	GE1	6	crus1	icrus1	IntPosterior	4	8
f	0	16		64.0954	4	2	400	GE1	6	crus1	icrus1	IntPosterior	4	8
m	1	18	8	62.3544	4	2	400	GE1	7	crus1	icrus1	IntPosterior	4	8
m	1	23		49.2136	4	2	400	GE1	5	crus1	icrus1	IntPosterior	4	8
f	0	15		182.876	1	3	45	GE2	6	crus1	icrus1	IntPosterior	4	8
m	1	3			1	3	45	GE2	6	Crus1	iCrus1	IntPosterior	4	8
m	1	9	5	37.1574	1	3	45	GE2	6	Crus1	iCrus1	IntPosterior	4	8
f	0	1	6		2	3	120	GE3	6	Crus1	iCrus1	IntPosterior	4	8
f	0	1	7	100.454	2	3	120	GE3	6	Crus1	iCrus1	IntPosterior	4	8
m	1	7		49.0721	2	3	120	GE3	5	crus1	icrus1	IntPosterior	4	8
m	1	7		137.533	2	3	120	GE3	5	crus1	icrus1	IntPosterior	4	8
m	1	19		68.6645	2	3	120	GE3	6	crus1	icrus1	IntPosterior	4	8
m	1	19		16.9227	2	3	120	GE3	6	crus1	icrus1	IntPosterior	4	8
f	0	16	9	94.6054	3	3	210	GE4	6	crus1	icrus1	IntPosterior	4	8
f	0	20		45.3106	3	3	210	GE4	6	crus1	icrus1	IntPosterior	4	8
f	0	21	9	50.0669	3	3	210	GE4	6	crus1	icrus1	IntPosterior	4	8
m	1	4		67.7941	3	3	210	GE4	6	crus1	icrus1	IntPosterior	4	8
f	0	13		90.3822	4	3	400	GE1	6	crus1	icrus1	IntPosterior	4	8
f	0	14		35.742	4	3	400	GE1	6	crus1	icrus1	IntPosterior	4	8
f	0	25	11	75.1264	4	3	400	GE1	6	crus1	icrus1	IntPosterior	4	8
m	1	12		52.3779	4	3	400	GE1	6	crus1	icrus1	IntPosterior	4	8
m	1	22		134.137	4	3	400	GE1	6	crus1	icrus1	IntPosterior	4	8
m	1	24		127.565	4	3	400	GE1	7	crus1	icrus1	IntPosterior	4	8
f	0	4	11	96.7823	1	4	45	GE2	7	crus1	icrus1	IntPosterior	4	8
f	0	4	12	43.8344	1	4	45	GE2	7	crus1	icrus1	IntPosterior	4	8
f	0	5	8	64.3176	1	4	45	GE2	6	crus1	icrus1	IntPosterior	4	8
f	0	6	8	44.6822	1	4	45	GE2	7	crus1	icrus1	IntPosterior	4	8
f	0	6	9	84.4364	1	4	45	GE2	7	crus1	icrus1	IntPosterior	4	8
m	1	1	16	61.2187	1	4	45	GE2	7	crus1	icrus1	IntPosterior	4	8
m	1	3	10	84.2538	1	4	45	GE2	7	crus1	icrus1	IntPosterior	4	8
m	1	8	13	68.9242	1	4	45	GE2	6	crus1	icrus1	IntPosterior	4	8
m	1	8	14	36.2028	1	4	45	GE2	6	crus1	icrus1	IntPosterior	4	8
f	0	9	4	90.8724	2	4	120	GE3	5	crus1	icrus1	IntPosterior	4	8
f	0	10	10	55.3783	2	4	120	GE3	6	crus1	icrus1	IntPosterior	4	8
f	0	14	9	61.3396	2	4	120	GE3	6	crus1	icrus1	IntPosterior	4	8
f	0	15	2	93.3922	2	4	120	GE3	7	crus1	icrus1	IntPosterior	4	8
m	1	11	12	55.9171	2	4	120	GE3	6	crus1	icrus1	IntPosterior	4	8
m	1	12	7	60.323	2	4	120	GE3	5	crus1	icrus1	IntPosterior	4	8
m	1	13	9	121.586	2	4	120	GE3	6	crus1	icrus1	IntPosterior	4	8
m	1	13	10	52.9255	2	4	120	GE3	6	crus1	icrus1	IntPosterior	4	8
m	1	16	12	67.923	2	4	120	GE3	6	crus1	icrus1	IntPosterior	4	8
f	0	21	2		3	4	210	GE4	6	crus1	icrus1		#N/A	8
f	0	21	3		3	4	210	GE4	6	crus1	icrus1		#N/A	8
f	0	23	5	92.0092	3	4	210	GE4	6	crus1	icrus1	IntPosterior	4	8
m	1	22	3	87.6118	3	4	210	GE4	6	crus1	icrus1	IntPosterior	4	8
m	1	22	4	85.3367	3	4	210	GE4	6	crus1	icrus1	IntPosterior	4	8
f	0	24	5	1.57611	4	4	400	GE1	5	Crus1	iCrus1	IntPosterior	4	8
f	0	25	7		4	4	400	GE1	6	Crus1	iCrus1		#N/A	8
f	0	26	7	66.3317	4	4	400	GE1	6	crus1	icrus1	IntPosterior	4	8
m	1	28	8	44.7599	4	4	400	GE1	6	crus1	icrus1	IntPosterior	4	8
m	1	29	5	32.9792	4	4	400	GE1	6	crus1	icrus1	IntPosterior	4	8
m	1	30	9	57.5854	4	4	400	GE1	6	crus1	icrus1	IntPosterior	4	8
m	1	1	6	132.55	3	5	210	GE4	6	crus1	icrus1	IntPosterior	4	8
m	1	5	8	53.5347	4	5	400	GE1	6	Crus1	iCrus1	IntPosterior	4	8
m	1	7	9	57.3983	4	5	400	GE1	6	Crus1	iCrus1	IntPosterior	4	8
m	1	7	10		4	5	400	GE1	6	crus1	icrus1	IntPosterior	4	8
m	1	10	6	91.4566	4	5	400	GE1	6	crus1	icrus1	IntPosterior	4	8
f	0	4	13	114.576	1	1	45	GE2	6	crus2	icrus2	IntPosterior	4	9
f	0	12	6		1	1	45	GE2	6	crus2	icrus2	IntPosterior	4	9
f	0	13	6	59.4093	1	1	45	GE2	6	crus2	icrus2	IntPosterior	4	9
f	0	13	9		1	1	45	GE2	6	crus2	icrus2	IntPosterior	4	9
m	1	2	15	12.4395	1	1	45	GE2	8	crus2	icrus2	IntPosterior	4	9
m	1	2	16	123.353	1	1	45	GE2	8	crus2	icrus2	IntPosterior	4	9
m	1	5	11	131.146	1	1	45	GE2	6	crus2	icrus2	IntPosterior	4	9
m	1	5	12	115.977	1	1	45	GE2	6	crus2	icrus2	IntPosterior	4	9
m	1	5	13	55.559	1	1	45	GE2	6	crus2	icrus2	IntPosterior	4	9
f	0	10	4		2	1	120	GE3	6	crus2	icrus2	IntPosterior	4	9
f	0	19	13		2	1	120	GE3	6	Crus2	iCrus2	IntPosterior	4	9
m	1	6	6	147.218	2	1	120	GE3	5	crus2	icrus2	IntPosterior	4	9
m	1	6	7	70.1684	2	1	120	GE3	5	crus2	icrus2	IntPosterior	4	9
m	1	8	5	17.2435	2	1	120	GE3	7	crus2	icrus2	IntPosterior	4	9
m	1	8	7	89.3814	2	1	120	GE3	7	crus2	icrus2	IntPosterior	4	9
f	0	14	10	155.621	3	1	210	GE4	6	crus2	icrus2	IntPosterior	4	9
f	0	15	7	108.693	3	1	210	GE4	6	crus2	icrus2	IntPosterior	4	9
m	1	16	6	74.3969	3	1	210	GE4	6	crus2	icrus2	IntPosterior	4	9
m	1	16	7		3	1	210	GE4	6	crus2	icrus2	IntPosterior	4	9
m	1	29		102.421	3	1	210	GE4	6		iCrus2	IntPosterior	4	9
m	1	29			3	1	210	GE4	6		iCrus2	IntPosterior	4	9
f	0	24	11	137.57	4	1	400	GE1	6	Crus2	iCrus2	IntPosterior	4	9
f	0	25	7	46.8286	4	1	400	GE1	6	Crus2	iCrus2	IntPosterior	4	9
f	0	26	8	134.794	4	1	400	GE1	6	crus2	icrus2	IntPosterior	4	9
f	0	26	9	110.662	4	1	400	GE1	6	crus2	icrus2	IntPosterior	4	9
m	1	21	7	26.2241	4	1	400	GE1	6	crus2	icrus2	IntPosterior	4	9
m	1	22	10	121.612	4	1	400	GE1	6	crus2	icrus2	IntPosterior	4	9
f	0	22		24.5427	1	2	45	GE2	7	Crus2	iCrus2	IntPosterior	4	9
m	1	3	10	13.6551	1	2	45	GE2	6	crus2	icrus2	IntPosterior	4	9
m	1	3	11	47.007	1	2	45	GE2	6	crus2	icrus2	IntPosterior	4	9
m	1	3	12	63.1373	1	2	45	GE2	6	crus2	icrus2	IntPosterior	4	9
m	1	4	17	51.1243	1	2	45	GE2	6	crus2	icrus2	IntPosterior	4	9
m	1	5	13	24.5295	1	2	45	GE2	6	crus2	icrus2	IntPosterior	4	9
m	1	6	7	92.5873	1	2	45	GE2	7	crus2	icrus2	IntPosterior	4	9
f	0	8	6	78.2759	2	2	120	GE3	7	crus2	icrus2	IntPosterior	4	9
f	0	10		103.522	2	2	120	GE3	6	crus2	icrus2	IntPosterior	4	9
f	0	11			2	2	120	GE3	7	crus2	icrus2	IntPosterior	4	9
m	1	9	3	107.879	2	2	120	GE3	6	crus2	icrus2	IntPosterior	4	9
m	1	14	12	71.8866	2	2	120	GE3	6	crus2	icrus2	IntPosterior	4	9
m	1	14	13	34.188	2	2	120	GE3	6	crus2	icrus2	IntPosterior	4	9
m	1	19		69.4811	2	2	120	GE3	6	Crus2	iCrus2	IntPosterior	4	9
f	0	15	4	38.2289	3	2	210	GE4	6	crus2	icrus2	IntPosterior	4	9
m	1	17	17	34.1736	3	2	210	GE4	6	Crus2	iCrus2	IntPosterior	4	9
m	1	20		45.2167	3	2	210	GE4	6	crus2	icrus2	IntPosterior	4	9
m	1	21		72.259	3	2	210	GE4	6	crus2	icrus2	IntPosterior	4	9
m	1	23		51.2354	4	2	400	GE1	5	crus2	icrus2	IntPosterior	4	9
f	0	15		24.5291	1	3	45	GE2	6	crus2	icrus2	IntPosterior	4	9
f	0	17		82.8321	1	3	45	GE2	6	crus2	icrus2	IntPosterior	4	9
m	1	9	6	43.2692	1	3	45	GE2	6	Crus2	iCrus2	IntPosterior	4	9
m	1	9	7	142.153	1	3	45	GE2	6	Crus2	iCrus2	IntPosterior	4	9
f	0	1	8	81.242	2	3	120	GE3	6	Crus2	iCrus2	IntPosterior	4	9
m	1	5		77.4499	2	3	120	GE3	6	crus2	icrus2	IntPosterior	4	9
m	1	6		111.552	2	3	120	GE3	6	crus2	icrus2	IntPosterior	4	9
m	1	7		104.089	2	3	120	GE3	5	crus2	icrus2	IntPosterior	4	9
m	1	7		17.3075	2	3	120	GE3	5	crus2	icrus2	IntPosterior	4	9
m	1	19			2	3	120	GE3	6	crus2	icrus2	IntPosterior	4	9
m	1	19		58.7862	2	3	120	GE3	6	crus2	icrus2	IntPosterior	4	9
m	1	23		44.7511	2	3	120	GE3	6	crus2	icrus2	IntPosterior	4	9
f	0	16	10	71.8838	3	3	210	GE4	6	crus2	icrus2	IntPosterior	4	9
f	0	20		95.2549	3	3	210	GE4	6	crus2	icrus2	IntPosterior	4	9
m	1	4		45.5389	3	3	210	GE4	6	crus2	icrus2	IntPosterior	4	9
m	1	8		60.2315	3	3	210	GE4	6	crus2	icrus2	IntPosterior	4	9
f	0	13		37.0733	4	3	400	GE1	6	crus2	icrus2	IntPosterior	4	9
f	0	25	12	136.493	4	3	400	GE1	6	crus2	icrus2	IntPosterior	4	9
m	1	12		60.6388	4	3	400	GE1	6	crus2	icrus2	IntPosterior	4	9
m	1	22		42.5145	4	3	400	GE1	6	crus2	icrus2	IntPosterior	4	9
m	1	24		51.7476	4	3	400	GE1	6	crus2	icrus2	IntPosterior	4	9
m	1	24		96.8171	4	3	400	GE1	7	crus2	icrus2	IntPosterior	4	9
m	1	26	15	74.777	4	3	400	GE1	6	crus2	icrus2	IntPosterior	4	9
f	0	2	23	84.0217	1	4	45	GE2	7	crus2	icrus2	IntPosterior	4	9
f	0	6	6	20.5935	1	4	45	GE2	7	crus2	icrus2	IntPosterior	4	9
f	0	6	7	57.128	1	4	45	GE2	7	crus2	icrus2	IntPosterior	4	9
m	1	1	15	51.3709	1	4	45	GE2	7	crus2	icrus2	IntPosterior	4	9
m	1	8	11	30.8264	1	4	45	GE2	6	crus2	icrus2	IntPosterior	4	9
m	1	8	12	86.431	1	4	45	GE2	6	crus2	icrus2	IntPosterior	4	9
f	0	10	9	69.5264	2	4	120	GE3	6	crus2	icrus2	IntPosterior	4	9
f	0	14	10	41.2864	2	4	120	GE3	6	crus2	icrus2	IntPosterior	4	9
f	0	14	11	165.025	2	4	120	GE3	6	crus2	icrus2	IntPosterior	4	9
f	0	15	5	56.6057	2	4	120	GE3	7	crus2	icrus2	IntPosterior	4	9
m	1	11	10	75.6791	2	4	120	GE3	6	crus2	icrus2	IntPosterior	4	9
m	1	11	11	124.072	2	4	120	GE3	6	crus2	icrus2	IntPosterior	4	9
m	1	12	5	75.9602	2	4	120	GE3	5	crus2	icrus2	IntPosterior	4	9
m	1	12	6	59.5739	2	4	120	GE3	5	crus2	icrus2	IntPosterior	4	9
m	1	16	11	134.936	2	4	120	GE3	6	crus2	icrus2	IntPosterior	4	9
f	0	20	8		3	4	210	GE4	6	crus2	icrus2		#N/A	9
f	0	20	9	75.2589	3	4	210	GE4	6	crus2	icrus2	IntPosterior	4	9
f	0	23	4	138.013	3	4	210	GE4	6	crus2	icrus2	IntPosterior	4	9
m	1	17	8	35.5655	3	4	210	GE4	6	crus2	icrus2	IntPosterior	4	9
m	1	18	7	104.683	3	4	210	GE4	6	crus2	icrus2	IntPosterior	4	9
f	0	24	4	104.905	4	4	400	GE1	5	Crus2	iCrus2	IntPosterior	4	9
f	0	25	8	28.7534	4	4	400	GE1	6	Crus2	iCrus2	IntPosterior	4	9
f	0	26	6	71.9728	4	4	400	GE1	6	crus2	icrus2	IntPosterior	4	9
m	1	28	9	70.3687	4	4	400	GE1	6	crus2	icrus2	IntPosterior	4	9
m	1	29	6	121.343	4	4	400	GE1	6	crus2	icrus2	IntPosterior	4	9
m	1	1	5	70.8178	3	5	210	GE4	6	crus2	icrus2	IntPosterior	4	9
f	0	6	10	63.953	4	5	400	GE1	6	Crus2	iCrus2	IntPosterior	4	9
m	1	3	4		4	5	400	GE1	6	crus2	icrus2	IntPosterior	4	9
m	1	4	7	60.6346	4	5	400	GE1	6	Crus2	iCrus2	IntPosterior	4	9
m	1	5	9		4	5	400	GE1	6	Crus2	iCrus2	IntPosterior	4	9
m	1	7	11		4	5	400	GE1	6	Crus2	iCrus2	IntPosterior	4	9
m	1	10	5		4	5	400	GE1	6	crus2	icrus2	IntPosterior	4	9
f	0	3	10	77.1388	1	1	45	GE2	6	pm	ipm	IntPosterior	4	10
f	0	3	11	95.4777	1	1	45	GE2	6	pm	ipm	IntPosterior	4	10
f	0	4	12	74.0849	1	1	45	GE2	6	pm	ipm	IntPosterior	4	10
f	0	12	7		1	1	45	GE2	6	pm	ipm	IntPosterior	4	10
m	1	5	14	75.8934	1	1	45	GE2	6	pm	ipm	IntPosterior	4	10
f	0	18	3	91.8438	2	1	120	GE3	7	pm	ipm	IntPosterior	4	10
f	0	18			2	1	120	GE3	7	pm	ipm	IntPosterior	4	10
f	0	19	14	39.6824	2	1	120	GE3	6	PM	iPM	IntPosterior	4	10
f	0	19	15	146.759	2	1	120	GE3	6	PM	iPM	IntPosterior	4	10
m	1	6	5		2	1	120	GE3	5	pm	ipm	IntPosterior	4	10
m	1	9	10		2	1	120	GE3	6	pm	ipm	IntPosterior	4	10
f	0	15	6		3	1	210	GE4	6	pm	ipm	IntPosterior	4	10
f	0	27		2.26554	3	1	210	GE4	6	pm	ipm	IntPosterior	4	10
f	0	28	10	131.16	3	1	210	GE4	6	pm	ipm	IntPosterior	4	10
m	1	17	12	114.646	3	1	210	GE4	6	pm	ipm	IntPosterior	4	10
m	1	29			3	1	210	GE4	6		iPM	IntPosterior	4	10
f	0	23		70.757	4	1	400	GE1	6	PM	iPM	IntPosterior	4	10
f	0	24	10	10.5971	4	1	400	GE1	6	PM	iPM	IntPosterior	4	10
f	0	25	9	72.0675	4	1	400	GE1	6	PM	iPM	IntPosterior	4	10
f	0	26	10	71.5668	4	1	400	GE1	6	PM	iPM	IntPosterior	4	10
m	1	22	11	55.5321	4	1	400	GE1	6	PM	iPM	IntPosterior	4	10
f	0	1	5	7.98669	1	2	45	GE2	6	pm	ipm	IntPosterior	4	10
f	0	2	7	46.3503	1	2	45	GE2	6	pm	ipm	IntPosterior	4	10
f	0	2	8	46.0714	1	2	45	GE2	6	pm	ipm	IntPosterior	4	10
f	0	2	9	48.4996	1	2	45	GE2	6	pm	ipm	IntPosterior	4	10
f	0	22		90.5766	1	2	45	GE2	7	PM	iPM	IntPosterior	4	10
m	1	3	13	63.9149	1	2	45	GE2	6	pm	ipm	IntPosterior	4	10
m	1	3	14	69.6851	1	2	45	GE2	6	pm	ipm	IntPosterior	4	10
m	1	3	15	17.6635	1	2	45	GE2	6	pm	ipm	IntPosterior	4	10
m	1	6	5	57.5404	1	2	45	GE2	7	pm	ipm	IntPosterior	4	10
m	1	6	6	96.3516	1	2	45	GE2	7	pm	ipm	IntPosterior	4	10
f	0	11		14.8045	2	2	120	GE3	7	pm	ipm	IntPosterior	4	10
f	0	12	11	163.523	2	2	120	GE3	5	pm	ipm	IntPosterior	4	10
f	0	12	12	5.05221	2	2	120	GE3	5	pm	ipm	IntPosterior	4	10
f	0	12	13	25.37	2	2	120	GE3	5	pm	ipm	IntPosterior	4	10
m	1	9	4	54.0176	2	2	120	GE3	6	pm	ipm	IntPosterior	4	10
m	1	9	5	98.4383	2	2	120	GE3	6	pm	ipm	IntPosterior	4	10
m	1	14	10	47.3956	2	2	120	GE3	6	pm	ipm	IntPosterior	4	10
m	1	14	11	59.0139	2	2	120	GE3	6	pm	ipm	IntPosterior	4	10
m	1	19		64.0252	2	2	120	GE3	6	PM	iPM	IntPosterior	4	10
m	1	20		46.6823	3	2	210	GE4	6	PM	iPM	IntPosterior	4	10
m	1	21		64.4024	3	2	210	GE4	6	PM	iPM	IntPosterior	4	10
m	1	18	7		4	2	400	GE1	7	PM	iPM	IntPosterior	4	10
m	1	23		49.6357	4	2	400	GE1	5	pm	ipm	IntPosterior	4	10
f	0	15		87.6226	1	3	45	GE2	6	pm	ipm	IntPosterior	4	10
f	0	17		70.5905	1	3	45	GE2	6	pm	ipm	IntPosterior	4	10
m	1	2	3	73.3074	1	3	45	GE2	6	PM	iPM	IntPosterior	4	10
m	1	9	8	104.828	1	3	45	GE2	6	PM	iPM	IntPosterior	4	10
m	1	10	7	9.05056	1	3	45	GE2	7	PM	iPM	IntPosterior	4	10
m	1	6		70.0674	2	3	120	GE3	6	PM	iPM	IntPosterior	4	10
m	1	19		55.7064	2	3	120	GE3	6	pm	ipm	IntPosterior	4	10
m	1	23		107.67	2	3	120	GE3	6	pm	ipm	IntPosterior	4	10
m	1	23			2	3	120	GE3	6	pm	ipm	IntPosterior	4	10
f	0	20		119.158	3	3	210	GE4	6	pm	ipm	IntPosterior	4	10
f	0	21	10	137.139	3	3	210	GE4	6	pm	ipm	IntPosterior	4	10
m	1	4		24.3443	3	3	210	GE4	6	pm	ipm	IntPosterior	4	10
m	1	8		73.1417	3	3	210	GE4	6	PM	iPM	IntPosterior	4	10
m	1	11	5	28.0457	3	3	210	GE4	6	PM	iPM	IntPosterior	4	10
f	0	14			4	3	400	GE1	6	pm	ipm	IntPosterior	4	10
f	0	25	13	124.251	4	3	400	GE1	6	pm	ipm	IntPosterior	4	10
m	1	12		49.7361	4	3	400	GE1	6	pm	ipm	IntPosterior	4	10
m	1	22		37.789	4	3	400	GE1	6	pm	ipm	IntPosterior	4	10
m	1	24		87.1601	4	3	400	GE1	6	pm	ipm	IntPosterior	4	10
m	1	24		72.2383	4	3	400	GE1	6	pm	ipm	IntPosterior	4	10
m	1	26	13	40.2689	4	3	400	GE1	6	pm	ipm	IntPosterior	4	10
m	1	26	14	46.8362	4	3	400	GE1	6	pm	ipm	IntPosterior	4	10
f	0	2	24	87.0516	1	4	45	GE2	7	pm	ipm	IntPosterior	4	10
f	0	2	25	45.493	1	4	45	GE2	7	pm	ipm	IntPosterior	4	10
m	1	1	12	51.1129	1	4	45	GE2	7	pm	ipm	IntPosterior	4	10
m	1	1	13	78.0629	1	4	45	GE2	7	pm	ipm	IntPosterior	4	10
m	1	1	14	59.7688	1	4	45	GE2	7	pm	ipm	IntPosterior	4	10
m	1	8	9	32.6315	1	4	45	GE2	6	pm	ipm	IntPosterior	4	10
m	1	8	10	115.313	1	4	45	GE2	6	pm	ipm	IntPosterior	4	10
f	0	9	3	82.017	2	4	120	GE3	5	pm	ipm	IntPosterior	4	10
f	0	10	8	105.176	2	4	120	GE3	6	pm	ipm	IntPosterior	4	10
f	0	14	12	97.2673	2	4	120	GE3	6	pm	ipm	IntPosterior	4	10
m	1	11	8	48.0115	2	4	120	GE3	6	pm	ipm	IntPosterior	4	10
m	1	11	9	91.8679	2	4	120	GE3	6	pm	ipm	IntPosterior	4	10
m	1	12	4	43.6373	2	4	120	GE3	5	pm	ipm	IntPosterior	4	10
m	1	13	8	80.8111	2	4	120	GE3	6	pm	ipm	IntPosterior	4	10
m	1	16	10		2	4	120	GE3	6	pm	ipm		#N/A	10
f	0	20	10		3	4	210	GE4	6	pm	ipm		#N/A	10
f	0	23	3	160.135	3	4	210	GE4	6	pm	ipm	IntPosterior	4	10
m	1	18	8	104.807	3	4	210	GE4	6	pm	ipm	IntPosterior	4	10
f	0	24	3	94.7732	4	4	400	GE1	5	PM	iPM	IntPosterior	4	10
f	0	25	6	38.8201	4	4	400	GE1	6	PM	iPM	IntPosterior	4	10
f	0	27	9	28.1532	4	4	400	GE1	6	pm	ipm	IntPosterior	4	10
m	1	28	10	88.8762	4	4	400	GE1	6	PM	iPM	IntPosterior	4	10
m	1	29	7	59.8463	4	4	400	GE1	6	PM	iPM	IntPosterior	4	10
m	1	30	10		4	4	400	GE1	6	PM	iPM		#N/A	10
f	0	6	11	21.0299	4	5	400	GE1	6	PM	iPM	IntPosterior	4	10
f	0	8	9	77.1162	4	5	400	GE1	6	PM	iPM	IntPosterior	4	10
m	1	2	5	35.5808	4	5	400	GE1	6	pm	ipm	IntPosterior	4	10
m	1	3	3	18.5649	4	5	400	GE1	6	pm	ipm	IntPosterior	4	10
m	1	5	10	90.5152	4	5	400	GE1	6	PM	iPM	IntPosterior	4	10
m	1	7	12	77.3399	4	5	400	GE1	6	pm	ipm	IntPosterior	4	10
m	1	10	4	110.303	4	5	400	GE1	6	PM	iPM	IntPosterior	4	10
m	1	10	7	30.8627	4	5	400	GE1	6	PM	iPM	IntPosterior	4	10
f	0	3	12	18.7598	1	1	45	GE2	6	cop	icop	IntPosterior	4	11
f	0	4	10	6.5249	1	1	45	GE2	6	cop	icop	IntPosterior	4	11
f	0	4	11	120.138	1	1	45	GE2	6	cop	icop	IntPosterior	4	11
f	0	13	10	98.7049	1	1	45	GE2	6	cop	icop	IntPosterior	4	11
f	0	13	11	56.4065	1	1	45	GE2	6	cop	icop	IntPosterior	4	11
m	1	5	15	184.192	1	1	45	GE2	6	cop	icop	IntPosterior	4	11
f	0	18		127.153	2	1	120	GE3	7	cop	icop	IntPosterior	4	11
m	1	6	4	127.253	2	1	120	GE3	5	cop	icop	IntPosterior	4	11
m	1	7	14	88.2149	2	1	120	GE3	7	cop	icop	IntPosterior	4	11
m	1	16	8	47.4579	3	1	210	GE4	6	cop	icop	IntPosterior	4	11
m	1	29		154.885	3	1	210	GE4	6		iCop	IntPosterior	4	11
f	0	24	9	26.3343	4	1	400	GE1	6	cop	icop	IntPosterior	4	11
f	0	25	6	67.4898	4	1	400	GE1	6	Cop	iCop	IntPosterior	4	11
f	0	2	5	53.7738	1	2	45	GE2	6	cop	icop	IntPosterior	4	11
f	0	2	6	62.0288	1	2	45	GE2	6	cop	icop	IntPosterior	4	11
m	1	5	14	54.4376	1	2	45	GE2	6	cop	icop	IntPosterior	4	11
m	1	6	4	42.7387	1	2	45	GE2	7	cop	icop	IntPosterior	4	11
f	0	10		10.4666	2	2	120	GE3	6	cop	icop	IntPosterior	4	11
f	0	10		41.2628	2	2	120	GE3	6	cop	icop	IntPosterior	4	11
m	1	9	6	41.4758	2	2	120	GE3	6	cop	icop	IntPosterior	4	11
m	1	14	18	13.5233	2	2	120	GE3	6	cop	icop	IntPosterior	4	11
m	1	19		33.2156	2	2	120	GE3	6	Cop	iCop	IntPosterior	4	11
m	1	17	18	17.6497	3	2	210	GE4	6	cop	icop	IntPosterior	4	11
m	1	20		45.4707	3	2	210	GE4	6	cop	icop	IntPosterior	4	11
m	1	21		53.3413	3	2	210	GE4	6	cop	icop	IntPosterior	4	11
m	1	18	6	28.4259	4	2	400	GE1	7	cop	icop	IntPosterior	4	11
m	1	23		30.3583	4	2	400	GE1	7	cop	icop	IntPosterior	4	11
m	1	23		17.1381	4	2	400	GE1	5	cop	icop	IntPosterior	4	11
f	0	15		88.6779	1	3	45	GE2	6	cop	icop	IntPosterior	4	11
f	0	17		60.5508	1	3	45	GE2	6	cop	icop	IntPosterior	4	11
m	1	2	2	68.0433	1	3	45	GE2	6	Cop	iCop	IntPosterior	4	11
m	1	3		102.402	1	3	45	GE2	6	Cop	iCop	IntPosterior	4	11
m	1	9	9	137.417	1	3	45	GE2	6	cop	icop	IntPosterior	4	11
m	1	7		40.9551	2	3	120	GE3	5	cop	icop	IntPosterior	4	11
m	1	19		90.0067	2	3	120	GE3	6	cop	icop	IntPosterior	4	11
m	1	19			2	3	120	GE3	6	cop	icop	IntPosterior	4	11
f	0	16	11		3	3	210	GE4	6	cop	icop	IntPosterior	4	11
f	0	20			3	3	210	GE4	6	cop	icop	IntPosterior	4	11
f	0	20		124.298	3	3	210	GE4	6	cop	icop	IntPosterior	4	11
m	1	4		67.9291	3	3	210	GE4	6	cop	icop	IntPosterior	4	11
f	0	14		33.5392	4	3	400	GE1	6	cop	icop	IntPosterior	4	11
f	0	25	14	67.4165	4	3	400	GE1	6	cop	icop	IntPosterior	4	11
m	1	22		13.8958	4	3	400	GE1	6	cop	icop	IntPosterior	4	11
m	1	24		25.5737	4	3	400	GE1	7	cop	icop	IntPosterior	4	11
m	1	26	11		4	3	400	GE1	6	cop	icop	IntPosterior	4	11
m	1	26	12	65.8576	4	3	400	GE1	6	cop	icop	IntPosterior	4	11
f	0	2	26	47.3415	1	4	45	GE2	7	cop	icop	IntPosterior	4	11
f	0	2	27	28.8728	1	4	45	GE2	7	cop	icop	IntPosterior	4	11
f	0	4	6	32.4254	1	4	45	GE2	7	cop	icop	IntPosterior	4	11
f	0	4	7	45.8322	1	4	45	GE2	7	cop	icop	IntPosterior	4	11
f	0	4	8	83.6418	1	4	45	GE2	7	cop	icop	IntPosterior	4	11
f	0	4	9	137.444	1	4	45	GE2	7	cop	icop	IntPosterior	4	11
f	0	4	10	50.9853	1	4	45	GE2	7	cop	icop	IntPosterior	4	11
m	1	1	10	22.2706	1	4	45	GE2	7	cop	icop	IntPosterior	4	11
m	1	1	11	30.8311	1	4	45	GE2	7	cop	icop	IntPosterior	4	11
m	1	8	7	65.1801	1	4	45	GE2	6	cop	icop	IntPosterior	4	11
m	1	8	8	41.574	1	4	45	GE2	6	cop	icop	IntPosterior	4	11
f	0	9	2	87.7372	2	4	120	GE3	5	cop	icop	IntPosterior	4	11
f	0	10	7	56.5192	2	4	120	GE3	6	cop	icop	IntPosterior	4	11
m	1	12	8	45.3193	2	4	120	GE3	5	cop	icop	IntPosterior	4	11
m	1	13	7		2	4	120	GE3	6	cop	icop		#N/A	11
m	1	16	9	86.4296	2	4	120	GE3	6	cop	icop	IntPosterior	4	11
m	1	22	5	63.1011	3	4	210	GE4	6	cop	icop	IntPosterior	4	11
f	0	25	5	5.35583	4	4	400	GE1	6	cop	icop	IntPosterior	4	11
f	0	26	5		4	4	400	GE1	6	cop	icop		#N/A	11
m	1	29	8	32.5285	4	4	400	GE1	6	cop	icop	IntPosterior	4	11
m	1	1	4	50.447	3	5	210	GE4	6	cop	icop	IntPosterior	4	11
m	1	2	4	60.0243	4	5	400	GE1	6	cop	icop	IntPosterior	4	11
m	1	4	8		4	5	400	GE1	6	cop	icop	IntPosterior	4	11
m	1	5	11	33.5528	4	5	400	GE1	6	Cop	iCop	IntPosterior	4	11
f	0	3	8	72.6967	1	1	45	GE2	6	4/5	i4/5	IntAnterior	3	12
f	0	12	5	81.3264	1	1	45	GE2	6	4/5	i4/5	IntAnterior	3	12
m	1	1	21	50.3355	1	1	45	GE2	7	4/5	i4/5	IntAnterior	3	12
m	1	2	11	92.531	1	1	45	GE2	8	4/5	i4/5	IntAnterior	3	12
m	1	2	12	85.6253	1	1	45	GE2	8	4/5	i4/5	IntAnterior	3	12
m	1	2	13	48.2362	1	1	45	GE2	8	4/5	i4/5	IntAnterior	3	12
m	1	5	6		1	1	45	GE2	6	4/5	i4/5	IntAnterior	3	12
f	0	11	6	54.175	2	1	120	GE3	6	4/5	i4/5	IntAnterior	3	12
f	0	18	2		2	1	120	GE3	7	4/5	i4/5	IntAnterior	3	12
f	0	19	10	17.8238	2	1	120	GE3	6	4/5	i4/5	IntAnterior	3	12
m	1	6	8	190.331	2	1	120	GE3	5	4/5	i4/5	IntAnterior	3	12
m	1	7	8	6.96584	2	1	120	GE3	7	4/5	i4/5	IntAnterior	3	12
m	1	7	9	62.1021	2	1	120	GE3	7	4/5	i4/5	IntAnterior	3	12
m	1	7	10		2	1	120	GE3	7	4/5	i4/5	IntAnterior	3	12
m	1	9	12		2	1	120	GE3	6	4/5	i4/5	IntAnterior	3	12
m	1	9	13	75.6107	2	1	120	GE3	6	4/5	i4/5	IntAnterior	3	12
f	0	14	7		3	1	210	GE4	6	4/5	i4/5	IntAnterior	3	12
m	1	17	7	107.672	3	1	210	GE4	6	4/5	i4/5	IntAnterior	3	12
m	1	17	8	19.4477	3	1	210	GE4	6	4/5	i4/5	IntAnterior	3	12
m	1	17	9	149.373	3	1	210	GE4	6	4/5	i4/5	IntAnterior	3	12
m	1	17	10	57.4775	3	1	210	GE4	6	4/5	i4/5	IntAnterior	3	12
m	1	29		53.2115	3	1	210	GE4	6		i4/5	IntAnterior	3	12
f	0	23		108.183	4	1	400	GE1	6	4/5	i4/5	IntAnterior	3	12
f	0	25	10	57.6865	4	1	400	GE1	6	4/5	i4/5	IntAnterior	3	12
f	0	1	4	143.49	1	2	45	GE2	6	4/5	i4/5	IntAnterior	3	12
f	0	2	15	125.427	1	2	45	GE2	6	4/5	i4/5	IntAnterior	3	12
f	0	7	5	21.3282	1	2	45	GE2	6	4/5	i4/5	IntAnterior	3	12
m	1	3	7	31.1748	1	2	45	GE2	6	4/5	i4/5	IntAnterior	3	12
m	1	3	8	25.6742	1	2	45	GE2	6	4/5	i4/5	IntAnterior	3	12
m	1	3	9	70.2004	1	2	45	GE2	6	4/5	i4/5	IntAnterior	3	12
m	1	5	9	49.6935	1	2	45	GE2	6	4/5	i4/5	IntAnterior	3	12
m	1	6	12	48.5925	1	2	45	GE2	7	4/5	i4/5	IntAnterior	3	12
f	0	8	9	19.698	2	2	120	GE3	7	4/5	i4/5	IntAnterior	3	12
f	0	8	10	53.2732	2	2	120	GE3	7	4/5	i4/5	IntAnterior	3	12
f	0	8	11	23.6967	2	2	120	GE3	7	4/5	i4/5	IntAnterior	3	12
f	0	10		20.8164	2	2	120	GE3	6	4/5	i4/5	IntAnterior	3	12
f	0	11		27.0384	2	2	120	GE3	7	4/5	i4/5	IntAnterior	3	12
f	0	11		26.7654	2	2	120	GE3	7	4/5	i4/5	IntAnterior	3	12
f	0	12	7	34.1156	2	2	120	GE3	5	4/5	i4/5	IntAnterior	3	12
m	1	13	10	43.1666	2	2	120	GE3	6	4/5	i4/5	IntAnterior	3	12
m	1	13	11	32.8469	2	2	120	GE3	6	4/5	i4/5	IntAnterior	3	12
m	1	19		22.28	2	2	120	GE3	6	4/5	i4/5	IntAnterior	3	12
m	1	17	12	14.3069	3	2	210	GE4	6	4/5	i4/5	IntAnterior	3	12
m	1	20		36.3793	3	2	210	GE4	6	4/5	i4/5	IntAnterior	3	12
m	1	21		25.9842	3	2	210	GE4	6	4/5	i4/5	IntAnterior	3	12
m	1	18	10	68.7877	4	2	400	GE1	7	4/5	i4/5	IntAnterior	3	12
m	1	23		63.8418	4	2	400	GE1	7	4/5	i4/5	IntAnterior	3	12
f	0	18	7	36.8348	1	3	45	GE2	7	4/5	i4/5	IntAnterior	3	12
m	1	9	3	76.2021	1	3	45	GE2	6	4/5	i4/5	IntAnterior	3	12
m	1	10	8		1	3	45	GE2	7	4/5	i4/5	IntAnterior	3	12
m	1	7		151.451	2	3	120	GE3	5	4/5	i4/5	IntAnterior	3	12
m	1	19		75.1728	2	3	120	GE3	6	4/5	i4/5	IntAnterior	3	12
f	0	16	8		3	3	210	GE4	6	4/5	i4/5	IntAnterior	3	12
f	0	20			3	3	210	GE4	6	4/5	i4/5	IntAnterior	3	12
m	1	11	4		3	3	210	GE4	6	4/5	i4/5	IntAnterior	3	12
f	0	25	8	71.9155	4	3	400	GE1	1900-01-06	4/5	i4/5	IntAnterior	3	12
m	1	12		48.6419	4	3	400	GE1	6	4/5	i4/5	IntAnterior	3	12
m	1	22		42.9067	4	3	400	GE1	6	4/5	i4/5	IntAnterior	3	12
m	1	26	17	30.9727	4	3	400	GE1	1900-01-06	4/5	i4/5	IntAnterior	3	12
m	1	26	18	68.1953	4	3	400	GE1	1900-01-06	4/5	i4/5	IntAnterior	3	12
f	0	2	17	118.705	1	4	45	GE2	7	4/5	i4/5	IntAnterior	3	12
f	0	2	18	74.8616	1	4	45	GE2	7	4/5	i4/5	IntAnterior	3	12
f	0	2	19	22.7559	1	4	45	GE2	7	4/5	i4/5	IntAnterior	3	12
f	0	2	20	117.086	1	4	45	GE2	7	4/5	i4/5	IntAnterior	3	12
f	0	4	14	24.0634	1	4	45	GE2	7	4/5	i4/5	IntAnterior	3	12
f	0	4	15	89.6517	1	4	45	GE2	7	4/5	i4/5	IntAnterior	3	12
f	0	5	7	93.6742	1	4	45	GE2	6	4/5	i4/5	IntAnterior	3	12
f	0	6	10	55.6306	1	4	45	GE2	7	4/5	i4/5	IntAnterior	3	12
f	0	6	11	32.0062	1	4	45	GE2	7	4/5	i4/5	IntAnterior	3	12
m	1	3	7	86.2055	1	4	45	GE2	7	4/5	i4/5	IntAnterior	3	12
m	1	3	8	2.85681	1	4	45	GE2	7	4/5	i4/5	IntAnterior	3	12
m	1	7	6		1	4	45	GE2	7	4/5	i4/5		#N/A	12
m	1	7	7	116.798	1	4	45	GE2	7	4/5	i4/5	IntAnterior	3	12
m	1	7	8	90.8182	1	4	45	GE2	7	4/5	i4/5	IntAnterior	3	12
m	1	8	17	59.6373	1	4	45	GE2	6	4/5	i4/5	IntAnterior	3	12
f	0	10	12	15.9156	2	4	120	GE3	6	4/5	i4/5	IntAnterior	3	12
f	0	14	7	30.5036	2	4	120	GE3	6	4/5	i4/5	IntAnterior	3	12
m	1	13	11		2	4	120	GE3	6	4/5	i4/5		#N/A	12
m	1	16	13	62.2711	2	4	120	GE3	6	4/5	i4/5	IntAnterior	3	12
f	0	19		5.19726	3	4	210	GE4	6	4/5	i4/5	IntAnterior	3	12
f	0	20	6		3	4	210	GE4	6	4/5	i4/5		#N/A	12
f	0	23	6	5.36185	3	4	210	GE4	6	4/5	i4/5	IntAnterior	3	12
f	0	23	7	64.5349	3	4	210	GE4	6	4/5	i4/5	IntAnterior	3	12
m	1	17	10	25.0702	3	4	210	GE4	6	4/5	i4/5	IntAnterior	3	12
m	1	18	5	58.3697	3	4	210	GE4	6	4/5	i4/5	IntAnterior	3	12
f	0	24	7		4	4	400	GE1	5	4/5	i4/5		#N/A	12
f	0	25	9	13.54	4	4	400	GE1	6	4/5	i4/5	IntAnterior	3	12
f	0	26	8		4	4	400	GE1	6	4/5	i4/5	IntAnterior	3	12
f	0	27	6		4	4	400	GE1	6	4/5	i4/5		#N/A	12
m	1	29	4	74.9772	4	4	400	GE1	6	4/5	i4/5	IntAnterior	3	12
m	1	30	7	92.609	4	4	400	GE1	6	4/5	i4/5	IntAnterior	3	12
m	1	1	8		3	5	210	GE4	6	4/5	i4/5	IntAnterior	3	12
f	0	9	2	7.86934	4	5	400	GE1	5	4/5	i4/5	IntAnterior	3	12
f	0	9	3	89.7481	4	5	400	GE1	5	4/5	i4/5	IntAnterior	3	12
m	1	4	5	60.1624	4	5	400	GE1	6	4/5	i4/5	IntAnterior	3	12
m	1	5	6	150.667	4	5	400	GE1	6	4/5	i4/5	IntAnterior	3	12
m	1	7	8	58.3611	4	5	400	GE1	6	4/5	i4/5	IntAnterior	3	12
f	0	3	13	59.9277	1	1	45	GE2	9	2	m2	MedAnterior	5	13
f	0	4	43	160.426	1	1	45	GE2	10	2	m2	MedAnterior	5	13
f	0	4	44	65.6566	1	1	45	GE2	10	2	m2	MedAnterior	5	13
f	0	4	45	129.766	1	1	45	GE2	10	2	m2	MedAnterior	5	13
f	0	12	23	128.827	1	1	45	GE2	12	2	m2	MedAnterior	5	13
f	0	12	24	169.218	1	1	45	GE2	12	2	m2	MedAnterior	5	13
f	0	13	12	79.974	1	1	45	GE2	12	2	m2	MedAnterior	5	13
f	0	13	13	82.1275	1	1	45	GE2	12	2	m2	MedAnterior	5	13
m	1	1	37	39.274	1	1	45	GE2	9	2	m2	MedAnterior	5	13
m	1	1	38	95.4469	1	1	45	GE2	9	2	m2	MedAnterior	5	13
m	1	1	39	68.4366	1	1	45	GE2	9	2	m2	MedAnterior	5	13
m	1	2	36	94.6632	1	1	45	GE2	11	2	m2	MedAnterior	5	13
m	1	2	37	73.4817	1	1	45	GE2	11	2	m2	MedAnterior	5	13
m	1	2	38	90.8974	1	1	45	GE2	11	2	m2	MedAnterior	5	13
m	1	5	16	72.4761	1	1	45	GE2	11	2	m2	MedAnterior	5	13
m	1	5	17	70.3482	1	1	45	GE2	11	2	m2	MedAnterior	5	13
m	1	5	18	27.43	1	1	45	GE2	11	2	m2	MedAnterior	5	13
f	0	10	5	122.393	2	1	120	GE3	11	2	m2	MedAnterior	5	13
f	0	10	6		2	1	120	GE3	11	2	m2	MedAnterior	5	13
f	0	10	7	85.9426	2	1	120	GE3	11	2	m2	MedAnterior	5	13
f	0	11	8	78.4888	2	1	120	GE3	12	2	m2	MedAnterior	5	13
f	0	11	9	88.9458	2	1	120	GE3	12	2	m2	MedAnterior	5	13
f	0	11	10	105.266	2	1	120	GE3	12	2	m2	MedAnterior	5	13
f	0	18			2	1	120	GE3	12	2	m2	MedAnterior	5	13
f	0	18		95.5659	2	1	120	GE3	12	2	m2	MedAnterior	5	13
f	0	18		81.2518	2	1	120	GE3	12	2	m2	MedAnterior	5	13
f	0	19	16	90.2656	2	1	120	GE3	11	2	m2	MedAnterior	5	13
f	0	19	17	74.4928	2	1	120	GE3	11	2	m2	MedAnterior	5	13
m	1	6	26		2	1	120	GE3	12	2	m2	MedAnterior	5	13
m	1	6	27	83.6609	2	1	120	GE3	12	2	m2	MedAnterior	5	13
m	1	7	15	52.2738	2	1	120	GE3	11	2	m2	MedAnterior	5	13
m	1	7	16	38.3277	2	1	120	GE3	11	2	m2	MedAnterior	5	13
m	1	8	8	50.7156	2	1	120	GE3	11	2	m2	MedAnterior	5	13
m	1	8	9	45.3258	2	1	120	GE3	11	2	m2	MedAnterior	5	13
m	1	9	31	47.0013	2	1	120	GE3	11	2	m2	MedAnterior	5	13
m	1	9	32	39.29	2	1	120	GE3	11	2	m2	MedAnterior	5	13
f	0	14	11	76.7646	3	1	210	GE4	12	2	m2	MedAnterior	5	13
f	0	14	12	81.2245	3	1	210	GE4	12	2	m2	MedAnterior	5	13
f	0	15	10	51.1988	3	1	210	GE4	12	2	m2	MedAnterior	5	13
f	0	15	11	71.6366	3	1	210	GE4	12	2	m2	MedAnterior	5	13
f	0	27		69.9565	3	1	210	GE4	12	2	m2	MedAnterior	5	13
f	0	27		86.6478	3	1	210	GE4	12	2	m2	MedAnterior	5	13
f	0	28	11	65.2471	3	1	210	GE4	12	2	m2	MedAnterior	5	13
f	0	28	12	73.4624	3	1	210	GE4	12	2	m2	MedAnterior	5	13
m	1	16	9	67.1761	3	1	210	GE4	11	2	m2	MedAnterior	5	13
m	1	16	10	72.3403	3	1	210	GE4	11	2	m2	MedAnterior	5	13
m	1	16	11	86.2473	3	1	210	GE4	11	2	m2	MedAnterior	5	13
m	1	17	13	173.351	3	1	210	GE4	11	2	m2	MedAnterior	5	13
m	1	17	14	66.4143	3	1	210	GE4	11	2	m2	MedAnterior	5	13
m	1	17	15	101.601	3	1	210	GE4	11	2	m2	MedAnterior	5	13
m	1	17	16	77.2729	3	1	210	GE4	11	2	m2	MedAnterior	5	13
m	1	29		78.507	3	1	210	GE4	12		m2	MedAnterior	5	13
m	1	29		61.4422	3	1	210	GE4	12		m2	MedAnterior	5	13
f	0	23		75.3438	4	1	400	GE1	12	2	m2	MedAnterior	5	13
f	0	23		79.8314	4	1	400	GE1	12	2	m2	MedAnterior	5	13
f	0	23		102.616	4	1	400	GE1	12	2	m2	MedAnterior	5	13
f	0	24	13	66.8407	4	1	400	GE1	12	2	m2	MedAnterior	5	13
f	0	24	14	51.2306	4	1	400	GE1	12	2	m2	MedAnterior	5	13
f	0	25	11	57.9147	4	1	400	GE1	12	2	m2	MedAnterior	5	13
f	0	25	12	69.5992	4	1	400	GE1	12	2	m2	MedAnterior	5	13
f	0	25	13		4	1	400	GE1	12	2	m2	MedAnterior	5	13
f	0	26	11	88.7478	4	1	400	GE1	12	2	m2	MedAnterior	5	13
f	0	26	12	58.4902	4	1	400	GE1	12	2	m2	MedAnterior	5	13
f	0	26	13	77.937	4	1	400	GE1	12	2	m2	MedAnterior	5	13
m	1	20	25	60.971	4	1	400	GE1	12	2	m2	MedAnterior	5	13
m	1	20	26	104.428	4	1	400	GE1	12	2	m2	MedAnterior	5	13
m	1	21	10	94.7724	4	1	400	GE1	12	2	m2	MedAnterior	5	13
m	1	21	11	50.0098	4	1	400	GE1	12	2	m2	MedAnterior	5	13
m	1	22	12	78.0694	4	1	400	GE1	12	2	m2	MedAnterior	5	13
m	1	22	13	122.711	4	1	400	GE1	12	2	m2	MedAnterior	5	13
m	1	22	14	78.5366	4	1	400	GE1	12	2	m2	MedAnterior	5	13
f	0	1	29	133.681	1	2	45	GE2	9	2	m2	MedAnterior	5	13
f	0	1	30	25.2864	1	2	45	GE2	9	2	m2	MedAnterior	5	13
f	0	1	31	85.231	1	2	45	GE2	9	2	m2	MedAnterior	5	13
f	0	2	16	21.1495	1	2	45	GE2	9	2	m2	MedAnterior	5	13
f	0	2	17	53.7547	1	2	45	GE2	9	2	m2	MedAnterior	5	13
f	0	2	18	49.3906	1	2	45	GE2	9	2	m2	MedAnterior	5	13
f	0	7	26	90.1557	1	2	45	GE2	10	2	m2	MedAnterior	5	13
f	0	22		22.0614	1	2	45	GE2	12	2	m2	MedAnterior	5	13
f	0	22		34.1255	1	2	45	GE2	12	2	m2	MedAnterior	5	13
m	1	3	35	46.9404	1	2	45	GE2	9	2	m2	MedAnterior	5	13
m	1	3	36	75.245	1	2	45	GE2	9	2	m2	MedAnterior	5	13
m	1	3	37	43.6436	1	2	45	GE2	9	2	m2	MedAnterior	5	13
m	1	3	38	34.1097	1	2	45	GE2	9	2	m2	MedAnterior	5	13
m	1	4	44	52.9514	1	2	45	GE2	9	2	m2	MedAnterior	5	13
m	1	4	45	37.1168	1	2	45	GE2	9	2	m2	MedAnterior	5	13
m	1	6	28	95.1335	1	2	45	GE2	11	2	m2	MedAnterior	5	13
m	1	6	29	50.7884	1	2	45	GE2	11	2	m2	MedAnterior	5	13
f	0	8	12	43.6371	2	2	120	GE3	10	2	m2	MedAnterior	5	13
f	0	8	13	42.5709	2	2	120	GE3	10	2	m2	MedAnterior	5	13
f	0	10		29.2374	2	2	120	GE3	11	2	m2	MedAnterior	5	13
f	0	10		84.5445	2	2	120	GE3	11	2	m2	MedAnterior	5	13
f	0	11		55.8347	2	2	120	GE3	11	2	m2	MedAnterior	5	13
f	0	11		24.055	2	2	120	GE3	11	2	m2	MedAnterior	5	13
f	0	11		19.7605	2	2	120	GE3	11	2	m2	MedAnterior	5	13
f	0	11		59.0412	2	2	120	GE3	11	2	m2	MedAnterior	5	13
f	0	12	33	37.9994	2	2	120	GE3	10	2	m2	MedAnterior	5	13
m	1	9	7	29.864	2	2	120	GE3	11	2	m2	MedAnterior	5	13
m	1	9	8	13.4652	2	2	120	GE3	11	2	m2	MedAnterior	5	13
m	1	13	14	50.3268	2	2	120	GE3	11	2	m2	MedAnterior	5	13
m	1	13	15	20.9151	2	2	120	GE3	11	2	m2	MedAnterior	5	13
m	1	14	19	50.1518	2	2	120	GE3	13	2	m2	MedAnterior	5	13
m	1	14	20	76.6204	2	2	120	GE3	13	2	m2	MedAnterior	5	13
m	1	14	21	44.1851	2	2	120	GE3	13	2	m2	MedAnterior	5	13
m	1	19		42.9152	2	2	120	GE3	12	2	m2	MedAnterior	5	13
m	1	19		51.9884	2	2	120	GE3	12	2	m2	MedAnterior	5	13
f	0	15	23	12.4497	3	2	210	GE4	12	2	m2	MedAnterior	5	13
f	0	15	24	82.0392	3	2	210	GE4	12	2	m2	MedAnterior	5	13
f	0	15	25	43.4881	3	2	210	GE4	12	2	m2	MedAnterior	5	13
m	1	17	33	23.4871	3	2	210	GE4	12	2	m2	MedAnterior	5	13
m	1	17	34	44.8691	3	2	210	GE4	12	2	m2	MedAnterior	5	13
m	1	20		36.6753	3	2	210	GE4	11	2	m2	MedAnterior	5	13
m	1	20		38.1564	3	2	210	GE4	11	2	m2	MedAnterior	5	13
m	1	21		16.8735	3	2	210	GE4	11	2	m2	MedAnterior	5	13
m	1	21		33.4172	3	2	210	GE4	11	2	m2	MedAnterior	5	13
f	0	16		44.7817	4	2	400	GE1	12	2	m2	MedAnterior	5	13
f	0	16		40.4501	4	2	400	GE1	12	2	m2	MedAnterior	5	13
m	1	18	27	60.2967	4	2	400	GE1	12	2	m2	MedAnterior	5	13
m	1	18	28	37.8747	4	2	400	GE1	12	2	m2	MedAnterior	5	13
m	1	23		41.2489	4	2	400	GE1	12	2	m2	MedAnterior	5	13
m	1	23		60.6298	4	2	400	GE1	12	2	m2	MedAnterior	5	13
m	1	23		56.015	4	2	400	GE1	12	2	m2	MedAnterior	5	13
f	0	15		32.3131	1	3	45	GE2	12	2	m2	MedAnterior	5	13
f	0	15		80.0627	1	3	45	GE2	12	2	m2	MedAnterior	5	13
f	0	17		57.6238	1	3	45	GE2	11	2	m2	MedAnterior	5	13
f	0	17		70.6624	1	3	45	GE2	11	2	m2	MedAnterior	5	13
f	0	18	10	45.0202	1	3	45	GE2	11	2	m2	MedAnterior	5	13
m	1	2	15	89.8242	1	3	45	GE2	12	2	m2	MedAnterior	5	13
m	1	2	16	100.717	1	3	45	GE2	12	2	m2	MedAnterior	5	13
m	1	3		57.8063	1	3	45	GE2	12	2	m2	MedAnterior	5	13
m	1	3		118.201	1	3	45	GE2	12	2	m2	MedAnterior	5	13
m	1	9	10	67.7455	1	3	45	GE2	11	2	m2	MedAnterior	5	13
m	1	9	11	53.272	1	3	45	GE2	11	2	m2	MedAnterior	5	13
m	1	10	10	54.7343	1	3	45	GE2	12	2	m2	MedAnterior	5	13
m	1	10	11	87.5778	1	3	45	GE2	12	2	m2	MedAnterior	5	13
f	0	1	9	61.5458	2	3	120	GE3	12	2	m2	MedAnterior	5	13
f	0	1	10	45.403	2	3	120	GE3	12	2	m2	MedAnterior	5	13
m	1	5		51.6642	2	3	120	GE3	12	2	m2	MedAnterior	5	13
m	1	5		54.6287	2	3	120	GE3	12	2	m2	MedAnterior	5	13
m	1	6		79.9397	2	3	120	GE3	12	2	m2	MedAnterior	5	13
m	1	6		66.391	2	3	120	GE3	12	2	m2	MedAnterior	5	13
m	1	7		47.177	2	3	120	GE3	12	2	m2	MedAnterior	5	13
m	1	7		121.961	2	3	120	GE3	12	2	m2	MedAnterior	5	13
m	1	19		57.7049	2	3	120	GE3	12	2	m2	MedAnterior	5	13
m	1	19		52.1845	2	3	120	GE3	12	2	m2	MedAnterior	5	13
m	1	23		67.4798	2	3	120	GE3	12	2	m2	MedAnterior	5	13
m	1	23		59.6742	2	3	120	GE3	12	2	m2	MedAnterior	5	13
f	0	16	12	39.3233	3	3	210	GE4	11	2	m2	MedAnterior	5	13
f	0	16	13	60.4754	3	3	210	GE4	11	2	m2	MedAnterior	5	13
f	0	20		40.2613	3	3	210	GE4	11	2	m2	MedAnterior	5	13
f	0	20		65.1834	3	3	210	GE4	11	2	m2	MedAnterior	5	13
f	0	21	12	148.354	3	3	210	GE4	11	2	m2	MedAnterior	5	13
f	0	21	13	75.7496	3	3	210	GE4	11	2	m2	MedAnterior	5	13
m	1	4		53.1817	3	3	210	GE4	11	2	m2	MedAnterior	4	13
m	1	4		60.2433	3	3	210	GE4	11	2	m2	MedAnterior	4	13
m	1	8		51.1972	3	3	210	GE4	12	2	m2	MedAnterior	5	13
m	1	8		87.3781	3	3	210	GE4	12	2	m2	MedAnterior	5	13
m	1	11	21	80.0279	3	3	210	GE4	12	2	m2	MedAnterior	5	13
m	1	11	22	81.0543	3	3	210	GE4	12	2	m2	MedAnterior	5	13
f	0	13		47.8507	4	3	400	GE1	12	2	m2	MedAnterior	5	13
f	0	13		73.0467	4	3	400	GE1	12	2	m2	MedAnterior	5	13
f	0	14		56.996	4	3	400	GE1	11	2	m2	MedAnterior	5	13
f	0	14		98.3824	4	3	400	GE1	11	2	m2	MedAnterior	5	13
f	0	25	15	85.5776	4	3	400	GE1	12	2	m2	MedAnterior	5	13
f	0	25	16	27.4336	4	3	400	GE1	12	2	m2	MedAnterior	5	13
m	1	12		62.7126	4	3	400	GE1	12	2	m2	MedAnterior	5	13
m	1	12		78.0672	4	3	400	GE1	12	2	m2	MedAnterior	5	13
m	1	22		77.9063	4	3	400	GE1	12	2	m2	MedAnterior	5	13
m	1	22		43.9645	4	3	400	GE1	12	2	m2	MedAnterior	5	13
m	1	24		52.6169	4	3	400	GE1	11	2	m2	MedAnterior	5	13
m	1	24		66.6314	4	3	400	GE1	11	2	m2	MedAnterior	5	13
m	1	26	19	69.3106	4	3	400	GE1	12	2	m2	MedAnterior	5	13
m	1	26	20	51.0874	4	3	400	GE1	12	2	m2	MedAnterior	5	13
f	0	2	50	30.5264	1	4	45	GE2	10	2	m2	MedAnterior	5	13
f	0	2	51	112.576	1	4	45	GE2	10	2	m2	MedAnterior	5	13
f	0	2	52	81.4083	1	4	45	GE2	10	2	m2	MedAnterior	5	13
f	0	4	33	88.0324	1	4	45	GE2	10	2	m2	MedAnterior	5	13
f	0	4	34	86.1118	1	4	45	GE2	10	2	m2	MedAnterior	5	13
f	0	5	9	51.217	1	4	45	GE2	10	2	m2	MedAnterior	5	13
f	0	5	10	51.8553	1	4	45	GE2	10	2	m2	MedAnterior	5	13
f	0	6	28	50.259	1	4	45	GE2	13	2	m2	MedAnterior	5	13
m	1	1	44	68.1534	1	4	45	GE2	10	2	m2	MedAnterior	5	13
m	1	1	45	58.7115	1	4	45	GE2	10	2	m2	MedAnterior	5	13
m	1	1	46	72.7204	1	4	45	GE2	10	2	m2	MedAnterior	5	13
m	1	1	47	56.9625	1	4	45	GE2	10	2	m2	MedAnterior	5	13
m	1	3	43	94.6655	1	4	45	GE2	11	2	m2	MedAnterior	5	13
m	1	3	44	116.486	1	4	45	GE2	11	2	m2	MedAnterior	5	13
m	1	7	9	58.6557	1	4	45	GE2	11	2	m2	MedAnterior	5	13
m	1	7	10	51.1538	1	4	45	GE2	11	2	m2	MedAnterior	5	13
m	1	8	34	70.452	1	4	45	GE2	11	2	m2	MedAnterior	5	13
f	0	9	5	25.888	2	4	120	GE3	10	2	m2	MedAnterior	5	13
f	0	9	6	38.4575	2	4	120	GE3	10	2	m2	MedAnterior	5	13
f	0	10	13	47.3183	2	4	120	GE3	10	2	m2	MedAnterior	5	13
f	0	10	14	46.8322	2	4	120	GE3	10	2	m2	MedAnterior	5	13
f	0	14	13	126.879	2	4	120	GE3	12	2	m2	MedAnterior	5	13
f	0	14	14	95.8982	2	4	120	GE3	12	2	m2	MedAnterior	5	13
f	0	15	21	85.7806	2	4	120	GE3	12	2	m2	MedAnterior	5	13
f	0	15	22	89.999	2	4	120	GE3	12	2	m2	MedAnterior	5	13
m	1	11	27	98.5888	2	4	120	GE3	12	2	m2	MedAnterior	5	13
m	1	11	28	62.7824	2	4	120	GE3	12	2	m2	MedAnterior	5	13
m	1	12	29	41.4309	2	4	120	GE3	11	2	m2	MedAnterior	5	13
m	1	12	30	65.2985	2	4	120	GE3	11	2	m2	MedAnterior	5	13
m	1	12	31	42.9226	2	4	120	GE3	11	2	m2	MedAnterior	5	13
m	1	13	26	69.1511	2	4	120	GE3	12	2	m2	MedAnterior	5	13
m	1	13	27	80.8842	2	4	120	GE3	12	2	m2	MedAnterior	5	13
m	1	16	14	59.4302	2	4	120	GE3	11	2	m2	MedAnterior	5	13
m	1	16	15	65.6933	2	4	120	GE3	11	2	m2	MedAnterior	5	13
f	0	19		119.197	3	4	210	GE4	11	2	m2	MedAnterior	5	13
f	0	19		111.598	3	4	210	GE4	11	2	m2	MedAnterior	5	13
f	0	19		121.211	3	4	210	GE4	11	2	m2	MedAnterior	5	13
f	0	20	30	93.411	3	4	210	GE4	12	2	m2	MedAnterior	5	13
f	0	20	31	93.218	3	4	210	GE4	12	2	m2	MedAnterior	5	13
f	0	20	32	37.198	3	4	210	GE4	12	2	m2	MedAnterior	5	13
f	0	20	33	85.4729	3	4	210	GE4	12	2	m2	MedAnterior	5	13
f	0	20	34	109.439	3	4	210	GE4	12	2	m2	MedAnterior	5	13
f	0	21	4	59.0996	3	4	210	GE4	12	2	m2	MedAnterior	5	13
f	0	21	5	79.8312	3	4	210	GE4	12	2	m2	MedAnterior	5	13
f	0	23	8	28.9938	3	4	210	GE4	11	2	m2	MedAnterior	5	13
f	0	23	9	47.022	3	4	210	GE4	11	2	m2	MedAnterior	5	13
f	0	23	10	87.4056	3	4	210	GE4	11	2	m2	MedAnterior	5	13
m	1	17	11	55.7909	3	4	210	GE4	11	2	m2	MedAnterior	5	13
m	1	17	12	75.7964	3	4	210	GE4	11	2	m2	MedAnterior	5	13
m	1	18	9	71.2869	3	4	210	GE4	12	2	m2	MedAnterior	5	13
m	1	18	10	77.1106	3	4	210	GE4	12	2	m2	MedAnterior	5	13
m	1	18	11	63.6249	3	4	210	GE4	12	2	m2	MedAnterior	5	13
m	1	22	21	118.215	3	4	210	GE4	12	2	m2	MedAnterior	5	13
m	1	22	22	47.3622	3	4	210	GE4	12	2	m2	MedAnterior	5	13
m	1	22	23	81.0058	3	4	210	GE4	12	2	m2	MedAnterior	5	13
f	0	24	8	25.871	4	4	400	GE1	12	2	m2	MedAnterior	5	13
f	0	24	9	79.5986	4	4	400	GE1	12	2	m2	MedAnterior	5	13
f	0	25	10	69.4711	4	4	400	GE1	12	2	m2	MedAnterior	5	13
f	0	25	11	39.8935	4	4	400	GE1	12	2	m2	MedAnterior	5	13
f	0	26	9	68.7971	4	4	400	GE1	12	2	m2	MedAnterior	5	13
f	0	26	10	42.4333	4	4	400	GE1	12	2	m2	MedAnterior	5	13
f	0	27	10	75.6405	4	4	400	GE1	12	2	m2	MedAnterior	5	13
f	0	27	11	69.2115	4	4	400	GE1	12	2	m2	MedAnterior	5	13
m	1	28	11	53.2986	4	4	400	GE1	12	2	m2	MedAnterior	5	13
m	1	28	12	99.6269	4	4	400	GE1	12	2	m2	MedAnterior	5	13
m	1	29	9	93.4667	4	4	400	GE1	12	2	m2	MedAnterior	5	13
m	1	29	10	75.8916	4	4	400	GE1	12	2	m2	MedAnterior	5	13
m	1	30	23	92.5617	4	4	400	GE1	12	2	m2	MedAnterior	5	13
m	1	30	24	67.3515	4	4	400	GE1	12	2	m2	MedAnterior	5	13
m	1	1	9	23.9517	3	5	210	GE4	11	2	m2	MedAnterior	5	13
m	1	1	10	88.612	3	5	210	GE4	11	2	m2	MedAnterior	5	13
m	1	1	11	51.9744	3	5	210	GE4	11	2	m2	MedAnterior	5	13
m	1	1	12	54.5237	3	5	210	GE4	11	2	m2	MedAnterior	5	13
m	1	1	13	78.1203	3	5	210	GE4	11	2	m2	MedAnterior	5	13
f	0	6	12	35.6685	4	5	400	GE1	12	2	m2	MedAnterior	5	13
f	0	6	13	56.1242	4	5	400	GE1	12	2	m2	MedAnterior	5	13
f	0	8	10	37.9917	4	5	400	GE1	11	2	m2	MedAnterior	5	13
f	0	8	11	103.719	4	5	400	GE1	11	2	m2	MedAnterior	5	13
f	0	9	4	78.2119	4	5	400	GE1	12	2	m2	MedAnterior	5	13
f	0	9	5	69.1342	4	5	400	GE1	12	2	m2	MedAnterior	5	13
m	1	2	6	45.4761	4	5	400	GE1	11	2	m2	MedAnterior	5	13
m	1	2	7	60.2537	4	5	400	GE1	11	2	m2	MedAnterior	5	13
m	1	2	8	50.1675	4	5	400	GE1	11	2	m2	MedAnterior	5	13
m	1	3	6	59.7981	4	5	400	GE1	12	2	m2	MedAnterior	5	13
m	1	3	7	42.0883	4	5	400	GE1	12	2	m2	MedAnterior	5	13
m	1	4	25	59.2416	4	5	400	GE1	12	2	m2	MedAnterior	5	13
m	1	4	26	94.9168	4	5	400	GE1	12	2	m2	MedAnterior	5	13
m	1	4	27	74.9571	4	5	400	GE1	12	2	m2	MedAnterior	5	13
m	1	5	27	77.2481	4	5	400	GE1	12	2	m2	MedAnterior	5	13
m	1	5	28	58.7415	4	5	400	GE1	12	2	m2	MedAnterior	5	13
m	1	5	29	75.8133	4	5	400	GE1	12	2	m2	MedAnterior	5	13
m	1	5	30	70.2434	4	5	400	GE1	12	2	m2	MedAnterior	5	13
m	1	7	14	100.259	4	5	400	GE1	12	2	m2	MedAnterior	5	13
m	1	7	15	81.2419	4	5	400	GE1	12	2	m2	MedAnterior	5	13
m	1	10	8	96.444	4	5	400	GE1	12	2	m2	MedAnterior	5	13
m	1	10	9	51.9135	4	5	400	GE1	12	2	m2	MedAnterior	5	13
f	0	3	14	86.469	1	1	45	GE2	9	3	m3	MedAnterior	5	14
f	0	3	15	118.991	1	1	45	GE2	9	3	m3	MedAnterior	5	14
f	0	4	38	39.8284	1	1	45	GE2	10	3	m3	MedAnterior	5	14
f	0	4	39	70.2203	1	1	45	GE2	10	3	m3	MedAnterior	5	14
f	0	4	40	179.774	1	1	45	GE2	10	3	m3	MedAnterior	5	14
f	0	4	41	60.302	1	1	45	GE2	10	3	m3	MedAnterior	5	14
f	0	4	42	105.093	1	1	45	GE2	10	3	m3	MedAnterior	5	14
f	0	12	20	97.8861	1	1	45	GE2	12	3	m3	MedAnterior	5	14
f	0	12	21	152.793	1	1	45	GE2	12	3	m3	MedAnterior	5	14
f	0	12	22	40.9671	1	1	45	GE2	12	3	m3	MedAnterior	5	14
f	0	13	14	81.7598	1	1	45	GE2	12	3	m3	MedAnterior	5	14
m	1	1	35	87.6924	1	1	45	GE2	9	3	m3	MedAnterior	5	14
m	1	1	36	34.7429	1	1	45	GE2	9	3	m3	MedAnterior	5	14
m	1	2	34	117.49	1	1	45	GE2	11	3	m3	MedAnterior	5	14
m	1	2	35	54.9057	1	1	45	GE2	11	3	m3	MedAnterior	5	14
m	1	5	19	67.1288	1	1	45	GE2	11	3	m3	MedAnterior	5	14
m	1	5	20	74.213	1	1	45	GE2	11	3	m3	MedAnterior	5	14
f	0	10	8		2	1	120	GE3	11	3	m3	MedAnterior	5	14
f	0	10	9	93.67	2	1	120	GE3	11	3	m3	MedAnterior	5	14
f	0	10	10	88.6078	2	1	120	GE3	11	3	m3	MedAnterior	5	14
f	0	11	11		2	1	120	GE3	12	3	m3	MedAnterior	5	14
f	0	11	12	183.662	2	1	120	GE3	12	3	m3	MedAnterior	5	14
f	0	11	13	201.077	2	1	120	GE3	12	3	m3	MedAnterior	5	14
f	0	18		114.252	2	1	120	GE3	12	3	m3	MedAnterior	5	14
f	0	18		149.894	2	1	120	GE3	12	3	m3	MedAnterior	5	14
f	0	18		68.1201	2	1	120	GE3	12	3	m3	MedAnterior	5	14
f	0	19	18	85.3012	2	1	120	GE3	11	3	m3	MedAnterior	5	14
f	0	19	19	97.3065	2	1	120	GE3	11	3	m3	MedAnterior	5	14
f	0	19	20	100.536	2	1	120	GE3	11	3	m3	MedAnterior	5	14
m	1	6	23	68.6385	2	1	120	GE3	12	3	m3	MedAnterior	5	14
m	1	6	24		2	1	120	GE3	12	3	m3	MedAnterior	5	14
m	1	6	25	70.5603	2	1	120	GE3	12	3	m3	MedAnterior	5	14
m	1	7	17	66.1789	2	1	120	GE3	11	3	m3	MedAnterior	5	14
m	1	7	18	33.5516	2	1	120	GE3	11	3	m3	MedAnterior	5	14
m	1	7	19	90.1871	2	1	120	GE3	11	3	m3	MedAnterior	5	14
m	1	8	10	42.2671	2	1	120	GE3	11	3	m3	MedAnterior	5	14
m	1	8	11	53.0179	2	1	120	GE3	11	3	m3	MedAnterior	5	14
m	1	8	12	79.0943	2	1	120	GE3	11	3	m3	MedAnterior	5	14
m	1	8	13		2	1	120	GE3	11	3	m3	MedAnterior	5	14
m	1	9	28	78.8049	2	1	120	GE3	11	3	m3	MedAnterior	5	14
m	1	9	29	110.289	2	1	120	GE3	11	3	m3	MedAnterior	5	14
m	1	9	30	58.6065	2	1	120	GE3	11	3	m3	MedAnterior	5	14
f	0	14	13	65.1105	3	1	210	GE4	12	3	m3	MedAnterior	5	14
f	0	14	14	86.3881	3	1	210	GE4	12	3	m3	MedAnterior	5	14
f	0	15	12	109.904	3	1	210	GE4	12	3	m3	MedAnterior	5	14
f	0	15	13	110.963	3	1	210	GE4	12	3	m3	MedAnterior	5	14
f	0	15	14	105.917	3	1	210	GE4	12	3	m3	MedAnterior	5	14
f	0	27		74.8886	3	1	210	GE4	12	3	m3	MedAnterior	5	14
f	0	27		96.8006	3	1	210	GE4	12	3	m3	MedAnterior	5	14
f	0	28	13	39.7585	3	1	210	GE4	12	3	m3	MedAnterior	5	14
f	0	28	14	95.5131	3	1	210	GE4	12	3	m3	MedAnterior	5	14
m	1	16	12	87.0639	3	1	210	GE4	11	3	m3	MedAnterior	5	14
m	1	16	13	120.022	3	1	210	GE4	11	3	m3	MedAnterior	5	14
m	1	16	14	121.15	3	1	210	GE4	11	3	m3	MedAnterior	5	14
m	1	17	17	69.2923	3	1	210	GE4	11	3	m3	MedAnterior	5	14
m	1	17	18	129.134	3	1	210	GE4	11	3	m3	MedAnterior	5	14
m	1	17	19		3	1	210	GE4	11	3	m3	MedAnterior	5	14
m	1	29		55.7777	3	1	210	GE4	12		m3	MedAnterior	5	14
m	1	29		79.4287	3	1	210	GE4	12		m3	MedAnterior	5	14
f	0	23		61.9648	4	1	400	GE1	12	3	m3	MedAnterior	5	14
f	0	23		99.0267	4	1	400	GE1	12	3	m3	MedAnterior	5	14
f	0	23		70.2167	4	1	400	GE1	12	3	m3	MedAnterior	5	14
f	0	24	15	79.6851	4	1	400	GE1	12	3	m3	MedAnterior	5	14
f	0	24	16	47.7107	4	1	400	GE1	12	3	m3	MedAnterior	5	14
f	0	25	14	64.4639	4	1	400	GE1	12	3	m3	MedAnterior	5	14
f	0	25	15	111.58	4	1	400	GE1	12	3	m3	MedAnterior	5	14
f	0	25	16	80.5474	4	1	400	GE1	12	3	m3	MedAnterior	5	14
f	0	26	14	50.8972	4	1	400	GE1	12	3	m3	MedAnterior	5	14
f	0	26	15	83.3571	4	1	400	GE1	12	3	m3	MedAnterior	5	14
f	0	26	16	40.0719	4	1	400	GE1	12	3	m3	MedAnterior	5	14
m	1	20	22	104.366	4	1	400	GE1	12	3	m3	MedAnterior	5	14
m	1	20	23	31.094	4	1	400	GE1	12	3	m3	MedAnterior	5	14
m	1	20	24	116.963	4	1	400	GE1	12	3	m3	MedAnterior	5	14
m	1	21	12	135.664	4	1	400	GE1	12	3	m3	MedAnterior	5	14
m	1	21	13	126.856	4	1	400	GE1	12	3	m3	MedAnterior	5	14
m	1	22	15	69.1066	4	1	400	GE1	12	3	m3	MedAnterior	5	14
m	1	22	16	195.015	4	1	400	GE1	12	3	m3	MedAnterior	5	14
f	0	1	26	60.9485	1	2	45	GE2	9	3	m3	MedAnterior	5	14
f	0	1	27	61.8402	1	2	45	GE2	9	3	m3	MedAnterior	5	14
f	0	1	28	34.5215	1	2	45	GE2	9	3	m3	MedAnterior	5	14
f	0	2	19	34.5144	1	2	45	GE2	9	3	m3	MedAnterior	5	14
f	0	2	20	45.6335	1	2	45	GE2	9	3	m3	MedAnterior	5	14
f	0	2	21	40.7152	1	2	45	GE2	9	3	m3	MedAnterior	5	14
f	0	7	23	24.7422	1	2	45	GE2	10	3	m3	MedAnterior	5	14
f	0	7	24	63.1886	1	2	45	GE2	10	3	m3	MedAnterior	5	14
f	0	7	25	58.1519	1	2	45	GE2	10	3	m3	MedAnterior	5	14
f	0	22		84.7458	1	2	45	GE2	12	3	m3	MedAnterior	5	14
f	0	22		78.2957	1	2	45	GE2	12	3	m3	MedAnterior	5	14
m	1	3	31	43.2895	1	2	45	GE2	9	3	m3	MedAnterior	5	14
m	1	3	32	39.2492	1	2	45	GE2	9	3	m3	MedAnterior	5	14
m	1	3	33	22.1305	1	2	45	GE2	9	3	m3	MedAnterior	5	14
m	1	3	34	41.8466	1	2	45	GE2	9	3	m3	MedAnterior	5	14
m	1	4	40	68.8464	1	2	45	GE2	9	3	m3	MedAnterior	5	14
m	1	4	41	45.4245	1	2	45	GE2	9	3	m3	MedAnterior	5	14
m	1	4	42	43.0726	1	2	45	GE2	9	3	m3	MedAnterior	5	14
m	1	4	43	49.4302	1	2	45	GE2	9	3	m3	MedAnterior	5	14
m	1	5	28	72.3477	1	2	45	GE2	10	3	m3	MedAnterior	5	14
m	1	5	29	49.9756	1	2	45	GE2	10	3	m3	MedAnterior	5	14
m	1	5	30	33.9787	1	2	45	GE2	10	3	m3	MedAnterior	5	14
m	1	5	31	77.2049	1	2	45	GE2	10	3	m3	MedAnterior	5	14
m	1	6	27	51.4073	1	2	45	GE2	11	3	m3	MedAnterior	5	14
f	0	8	14	20.9688	2	2	120	GE3	10	3	m3	MedAnterior	5	14
f	0	8	15	43.5487	2	2	120	GE3	10	3	m3	MedAnterior	5	14
f	0	8	16	35.3872	2	2	120	GE3	10	3	m3	MedAnterior	5	14
f	0	10		35.2792	2	2	120	GE3	11	3	m3	MedAnterior	5	14
f	0	10		51.2844	2	2	120	GE3	11	3	m3	MedAnterior	5	14
f	0	10		99.5207	2	2	120	GE3	11	3	m3	MedAnterior	5	14
f	0	11		42.421	2	2	120	GE3	11	3	m3	MedAnterior	5	14
f	0	11		45.5681	2	2	120	GE3	11	3	m3	MedAnterior	5	14
f	0	12	29	51.5783	2	2	120	GE3	10	3	m3	MedAnterior	5	14
f	0	12	30	65.0473	2	2	120	GE3	10	3	m3	MedAnterior	5	14
f	0	12	31	117.991	2	2	120	GE3	10	3	m3	MedAnterior	5	14
f	0	12	32	87.4962	2	2	120	GE3	10	3	m3	MedAnterior	5	14
m	1	9	9	100.944	2	2	120	GE3	11	3	m3	MedAnterior	5	14
m	1	9	10	49.986	2	2	120	GE3	11	3	m3	MedAnterior	5	14
m	1	9	11	14.4819	2	2	120	GE3	11	3	m3	MedAnterior	5	14
m	1	13	16	57.3342	2	2	120	GE3	11	3	m3	MedAnterior	5	14
m	1	13	17	43.1452	2	2	120	GE3	11	3	m3	MedAnterior	5	14
m	1	14	22	51.4515	2	2	120	GE3	13	3	m3	MedAnterior	5	14
m	1	14	23	45.99	2	2	120	GE3	13	3	m3	MedAnterior	5	14
m	1	19		49.2657	2	2	120	GE3	12	3	m3	MedAnterior	5	14
m	1	19		36.2379	2	2	120	GE3	12	3	m3	MedAnterior	5	14
m	1	19		41.3783	2	2	120	GE3	12	3	m3	MedAnterior	5	14
f	0	15	20	34.8243	3	2	210	GE4	12	3	m3	MedAnterior	5	14
f	0	15	21	39.3505	3	2	210	GE4	12	3	m3	MedAnterior	5	14
f	0	15	22	28.2877	3	2	210	GE4	12	3	m3	MedAnterior	5	14
m	1	17	30	60.8722	3	2	210	GE4	12	3	m3	MedAnterior	5	14
m	1	17	31	18.7648	3	2	210	GE4	12	3	m3	MedAnterior	5	14
m	1	17	32	10.2774	3	2	210	GE4	12	3	m3	MedAnterior	5	14
m	1	20		11.045	3	2	210	GE4	11	3	m3	MedAnterior	5	14
m	1	20		54.2047	3	2	210	GE4	11	3	m3	MedAnterior	5	14
m	1	21		29.888	3	2	210	GE4	11	3	m3	MedAnterior	5	14
m	1	21		32.7813	3	2	210	GE4	11	3	m3	MedAnterior	5	14
m	1	21		43.5877	3	2	210	GE4	11	3	m3	MedAnterior	5	14
f	0	16		14.2727	4	2	400	GE1	12	3	m3	MedAnterior	5	14
f	0	16		52.187	4	2	400	GE1	12	3	m3	MedAnterior	5	14
f	0	16		48.2646	4	2	400	GE1	12	3	m3	MedAnterior	5	14
m	1	18	24	13.1931	4	2	400	GE1	12	3	m3	MedAnterior	5	14
m	1	18	25	37.8929	4	2	400	GE1	12	3	m3	MedAnterior	5	14
m	1	18	26	28.612	4	2	400	GE1	12	3	m3	MedAnterior	5	14
m	1	23		41.0876	4	2	400	GE1	12	3	m3	MedAnterior	5	14
m	1	23		24.9756	4	2	400	GE1	12	3	m3	MedAnterior	5	14
m	1	23		36.7586	4	2	400	GE1	12	3	m3	MedAnterior	5	14
f	0	15		44.1378	1	3	45	GE2	12	3	m3	MedAnterior	5	14
f	0	15		74.6444	1	3	45	GE2	12	3	m3	MedAnterior	5	14
f	0	17		96.2757	1	3	45	GE2	11	3	m3	MedAnterior	5	14
f	0	17		74.6962	1	3	45	GE2	11	3	m3	MedAnterior	5	14
f	0	18	11		1	3	45	GE2	11	3	m3	MedAnterior	5	14
f	0	18	12	119.522	1	3	45	GE2	11	3	m3	MedAnterior	5	14
m	1	2	13	99.5987	1	3	45	GE2	12	3	m3	MedAnterior	5	14
m	1	2	14	145.318	1	3	45	GE2	12	3	m3	MedAnterior	5	14
m	1	3			1	3	45	GE2	12	3	m3	MedAnterior	5	14
m	1	3		178.145	1	3	45	GE2	12	3	m3	MedAnterior	5	14
m	1	3			1	3	45	GE2	12	3	m3		#N/A	14
m	1	9	12	72.1202	1	3	45	GE2	11	3	m3	MedAnterior	5	14
m	1	9	13	78.8855	1	3	45	GE2	11	3	m3	MedAnterior	5	14
m	1	10	12	126.988	1	3	45	GE2	12	3	m3	MedAnterior	5	14
m	1	10	13	95.4213	1	3	45	GE2	12	3	m3	MedAnterior	5	14
f	0	1	11	47.6686	2	3	120	GE3	12	3	m3	MedAnterior	5	14
f	0	1	12	75.3289	2	3	120	GE3	12	3	m3	MedAnterior	5	14
f	0	1	13	112.237	2	3	120	GE3	12	3	m3	MedAnterior	5	14
m	1	5		40.1039	2	3	120	GE3	12	3	m3	MedAnterior	5	14
m	1	5		126.539	2	3	120	GE3	12	3	m3	MedAnterior	5	14
m	1	5		101.331	2	3	120	GE3	12	3	m3	MedAnterior	5	14
m	1	6		76.2427	2	3	120	GE3	12	3	m3	MedAnterior	5	14
m	1	6		61.4109	2	3	120	GE3	12	3	m3	MedAnterior	5	14
m	1	6		54.0406	2	3	120	GE3	12	3	m3	MedAnterior	5	14
m	1	7		114.842	2	3	120	GE3	12	3	m3	MedAnterior	5	14
m	1	7		84.95	2	3	120	GE3	12	3	m3	MedAnterior	5	14
m	1	19		86.6927	2	3	120	GE3	12	3	m3	MedAnterior	5	14
m	1	19		91.6806	2	3	120	GE3	12	3	m3	MedAnterior	5	14
m	1	19		75.0163	2	3	120	GE3	12	3	m3	MedAnterior	5	14
m	1	23		49.4319	2	3	120	GE3	12	3	m3	MedAnterior	5	14
m	1	23		57.6788	2	3	120	GE3	12	3	m3	MedAnterior	5	14
m	1	23		55.8642	2	3	120	GE3	12	3	m3	MedAnterior	5	14
f	0	16	14	61.5414	3	3	210	GE4	11	3	m3	MedAnterior	5	14
f	0	16	15	90.9499	3	3	210	GE4	11	3	m3	MedAnterior	5	14
f	0	16	16	69.4748	3	3	210	GE4	11	3	m3	MedAnterior	5	14
f	0	20		53.9137	3	3	210	GE4	11	3	m3	MedAnterior	5	14
f	0	21	14	62.01	3	3	210	GE4	11	3	m3	MedAnterior	5	14
f	0	21	15	196.507	3	3	210	GE4	11	3	m3	MedAnterior	5	14
m	1	4			3	3	210	GE4	11	3	m3	MedAnterior	5	14
m	1	4		115.877	3	3	210	GE4	11	3	m3	MedAnterior	5	14
m	1	8		60.163	3	3	210	GE4	12	3	m3	MedAnterior	5	14
m	1	8		62.2385	3	3	210	GE4	12	3	m3	MedAnterior	5	14
m	1	11	19	74.8502	3	3	210	GE4	12	3	m3	MedAnterior	5	14
m	1	11	20	66.7362	3	3	210	GE4	12	3	m3	MedAnterior	5	14
f	0	13		46.5506	4	3	400	GE1	12	3	m3	MedAnterior	5	14
f	0	13		191.464	4	3	400	GE1	12	3	m3	MedAnterior	5	14
f	0	13		48.8878	4	3	400	GE1	12	3	m3	MedAnterior	5	14
f	0	14		82.4383	4	3	400	GE1	11	3	m3	MedAnterior	5	14
f	0	14		101.483	4	3	400	GE1	11	3	m3	MedAnterior	5	14
f	0	25	17	50.7152	4	3	400	GE1	12	3	m3	MedAnterior	5	14
f	0	25	18	55.9424	4	3	400	GE1	12	3	m3	MedAnterior	5	14
f	0	25	19	61.6167	4	3	400	GE1	12	3	m3	MedAnterior	5	14
m	1	12		99.1421	4	3	400	GE1	12	3	m3	MedAnterior	5	14
m	1	12		38.9477	4	3	400	GE1	12	3	m3	MedAnterior	5	14
m	1	22		33.7908	4	3	400	GE1	12	3	m3	MedAnterior	5	14
m	1	22		66.3441	4	3	400	GE1	12	3	m3	MedAnterior	5	14
m	1	22		91.6576	4	3	400	GE1	12	3	m3	MedAnterior	5	14
m	1	24		65.7027	4	3	400	GE1	11	3	m3	MedAnterior	5	14
m	1	24		62.9142	4	3	400	GE1	11	3	m3	MedAnterior	5	14
m	1	24		67.8479	4	3	400	GE1	11	3	m3	MedAnterior	5	14
m	1	26	21	60.0738	4	3	400	GE1	12	3	m3	MedAnterior	5	14
m	1	26	22	62.8049	4	3	400	GE1	12	3	m3	MedAnterior	5	14
m	1	26	23	90.8823	4	3	400	GE1	12	3	m3	MedAnterior	5	14
f	0	2	46	105.803	1	4	45	GE2	10	3	m3	MedAnterior	5	14
f	0	2	47	103.84	1	4	45	GE2	10	3	m3	MedAnterior	5	14
f	0	2	48		1	4	45	GE2	10	3	m3		#N/A	14
f	0	2	49	73.4876	1	4	45	GE2	10	3	m3	MedAnterior	5	14
f	0	4	31	73.6034	1	4	45	GE2	10	3	m3	MedAnterior	5	14
f	0	4	32	125.629	1	4	45	GE2	10	3	m3	MedAnterior	5	14
f	0	5	11	62.0504	1	4	45	GE2	10	3	m3	MedAnterior	5	14
f	0	5	12		1	4	45	GE2	10	3	m3		#N/A	14
f	0	6	27		1	4	45	GE2	13	3	m3		#N/A	14
m	1	1	39	75.998	1	4	45	GE2	10	3	m3	MedAnterior	5	14
m	1	1	40	75.1173	1	4	45	GE2	10	3	m3	MedAnterior	5	14
m	1	1	41	124.283	1	4	45	GE2	10	3	m3	MedAnterior	5	14
m	1	1	42	42.7833	1	4	45	GE2	10	3	m3	MedAnterior	5	14
m	1	1	43	44.8546	1	4	45	GE2	10	3	m3	MedAnterior	5	14
m	1	3	37	83.3961	1	4	45	GE2	11	3	m3	MedAnterior	5	14
m	1	3	38	83.8064	1	4	45	GE2	11	3	m3	MedAnterior	5	14
m	1	3	39	102.352	1	4	45	GE2	11	3	m3	MedAnterior	5	14
m	1	3	40	112.916	1	4	45	GE2	11	3	m3	MedAnterior	5	14
m	1	3	41	46.1191	1	4	45	GE2	11	3	m3	MedAnterior	5	14
m	1	3	42	98.3937	1	4	45	GE2	11	3	m3	MedAnterior	5	14
m	1	7	11	88.0685	1	4	45	GE2	11	3	m3	MedAnterior	5	14
m	1	7	12	136.024	1	4	45	GE2	11	3	m3	MedAnterior	5	14
m	1	7	13	55.3309	1	4	45	GE2	11	3	m3	MedAnterior	5	14
m	1	8	32	33.3072	1	4	45	GE2	11	3	m3	MedAnterior	5	14
m	1	8	33	89.588	1	4	45	GE2	11	3	m3	MedAnterior	5	14
f	0	9	7	41.2711	2	4	120	GE3	10	3	m3	MedAnterior	5	14
f	0	10	15	97.4679	2	4	120	GE3	10	3	m3	MedAnterior	5	14
f	0	10	16	80.7356	2	4	120	GE3	10	3	m3	MedAnterior	5	14
f	0	10	17	58.3099	2	4	120	GE3	10	3	m3	MedAnterior	5	14
f	0	14	15	39.6086	2	4	120	GE3	12	3	m3	MedAnterior	5	14
f	0	14	16	7.43218	2	4	120	GE3	12	3	m3	MedAnterior	5	14
f	0	14	17	98.8549	2	4	120	GE3	12	3	m3	MedAnterior	5	14
f	0	15	18	140.574	2	4	120	GE3	12	3	m3	MedAnterior	5	14
f	0	15	19	45.7457	2	4	120	GE3	12	3	m3	MedAnterior	5	14
m	1	11	25	71.7382	2	4	120	GE3	12	3	m3	MedAnterior	5	14
m	1	11	26	107.591	2	4	120	GE3	12	3	m3	MedAnterior	5	14
m	1	12	25	48.8865	2	4	120	GE3	11	3	m3	MedAnterior	5	14
m	1	12	26	37.4047	2	4	120	GE3	11	3	m3	MedAnterior	5	14
m	1	12	27	68.4413	2	4	120	GE3	11	3	m3	MedAnterior	5	14
m	1	12	28	48.5149	2	4	120	GE3	11	3	m3	MedAnterior	5	14
m	1	13	24	85.7837	2	4	120	GE3	12	3	m3	MedAnterior	5	14
m	1	13	25	68.2552	2	4	120	GE3	12	3	m3	MedAnterior	5	14
m	1	16	16	89.5901	2	4	120	GE3	11	3	m3	MedAnterior	5	14
m	1	16	17	63.806	2	4	120	GE3	11	3	m3	MedAnterior	5	14
m	1	16	18	92.8632	2	4	120	GE3	11	3	m3	MedAnterior	5	14
f	0	19		64.0476	3	4	210	GE4	11	3	m3	MedAnterior	5	14
f	0	19		86.6929	3	4	210	GE4	11	3	m3	MedAnterior	5	14
f	0	19		65.9604	3	4	210	GE4	11	3	m3	MedAnterior	5	14
f	0	19		217.493	3	4	210	GE4	11	3	m3	MedAnterior	5	14
f	0	20	27	43.8009	3	4	210	GE4	12	3	m3	MedAnterior	5	14
f	0	20	28	133.998	3	4	210	GE4	12	3	m3	MedAnterior	5	14
f	0	20	29	85.0093	3	4	210	GE4	12	3	m3	MedAnterior	5	14
f	0	21	6	73.0449	3	4	210	GE4	12	3	m3	MedAnterior	5	14
f	0	21	7	83.8336	3	4	210	GE4	12	3	m3	MedAnterior	5	14
f	0	21	8	130.663	3	4	210	GE4	12	3	m3	MedAnterior	5	14
f	0	23	11	95.0607	3	4	210	GE4	11	3	m3	MedAnterior	5	14
f	0	23	12	61.9898	3	4	210	GE4	11	3	m3	MedAnterior	5	14
m	1	17	13	65.2595	3	4	210	GE4	11	3	m3	MedAnterior	5	14
m	1	17	14	77.6302	3	4	210	GE4	11	3	m3	MedAnterior	5	14
m	1	18	12	88.1527	3	4	210	GE4	12	3	m3	MedAnterior	5	14
m	1	18	13	70.9111	3	4	210	GE4	12	3	m3	MedAnterior	5	14
m	1	18	14	132.57	3	4	210	GE4	12	3	m3	MedAnterior	5	14
m	1	22	18	40.5639	3	4	210	GE4	12	3	m3	MedAnterior	5	14
m	1	22	19	50.9754	3	4	210	GE4	12	3	m3	MedAnterior	5	14
m	1	22	20	103.088	3	4	210	GE4	12	3	m3	MedAnterior	5	14
f	0	24	10	90.3922	4	4	400	GE1	12	3	m3	MedAnterior	5	14
f	0	24	11	134.148	4	4	400	GE1	12	3	m3	MedAnterior	5	14
f	0	24	12	83.5002	4	4	400	GE1	12	3	m3	MedAnterior	5	14
f	0	25	12	75.4631	4	4	400	GE1	12	3	m3	MedAnterior	5	14
f	0	25	13	53.864	4	4	400	GE1	12	3	m3	MedAnterior	5	14
f	0	25	14	87.6118	4	4	400	GE1	12	3	m3	MedAnterior	5	14
f	0	26	11	58.9185	4	4	400	GE1	12	3	m3	MedAnterior	5	14
f	0	26	12	73.9763	4	4	400	GE1	12	3	m3	MedAnterior	5	14
f	0	27	12	38.4211	4	4	400	GE1	12	3	m3	MedAnterior	5	14
f	0	27	13	83.1979	4	4	400	GE1	12	3	m3	MedAnterior	5	14
m	1	28	13	64.6336	4	4	400	GE1	12	3	m3	MedAnterior	5	14
m	1	28	14	130.07	4	4	400	GE1	12	3	m3	MedAnterior	5	14
m	1	28	15	57.3822	4	4	400	GE1	12	3	m3	MedAnterior	5	14
m	1	29	11	79.8197	4	4	400	GE1	12	3	m3	MedAnterior	5	14
m	1	29	12	88.0949	4	4	400	GE1	12	3	m3	MedAnterior	5	14
m	1	30	21	92.6991	4	4	400	GE1	12	3	m3	MedAnterior	5	14
m	1	30	22	67.1814	4	4	400	GE1	12	3	m3	MedAnterior	5	14
m	1	1	14	67.5793	3	5	210	GE4	11	3	m3	MedAnterior	5	14
m	1	1	15	98.964	3	5	210	GE4	11	3	m3	MedAnterior	5	14
f	0	6	14	94.2075	4	5	400	GE1	12	3	m3	MedAnterior	5	14
f	0	6	15	93.815	4	5	400	GE1	12	3	m3	MedAnterior	5	14
f	0	8	12	22.3072	4	5	400	GE1	11	3	m3	MedAnterior	5	14
f	0	8	13	123.161	4	5	400	GE1	11	3	m3	MedAnterior	5	14
f	0	8	14	91.6772	4	5	400	GE1	11	3	m3	MedAnterior	5	14
f	0	9	6	72.992	4	5	400	GE1	12	3	m3	MedAnterior	5	14
f	0	9	7	55.1843	4	5	400	GE1	12	3	m3	MedAnterior	5	14
f	0	9	8	35.9631	4	5	400	GE1	12	3	m3	MedAnterior	5	14
m	1	2	9	36.9991	4	5	400	GE1	11	3	m3	MedAnterior	5	14
m	1	2	10	63.5352	4	5	400	GE1	11	3	m3	MedAnterior	5	14
m	1	2	11	44.4863	4	5	400	GE1	11	3	m3	MedAnterior	5	14
m	1	3	8	61.0959	4	5	400	GE1	12	3	m3	MedAnterior	5	14
m	1	3	9	116.133	4	5	400	GE1	12	3	m3	MedAnterior	5	14
m	1	3	10	80.3206	4	5	400	GE1	12	3	m3	MedAnterior	5	14
m	1	4	21	63.2595	4	5	400	GE1	12	3	m3	MedAnterior	5	14
m	1	4	23	24.7203	4	5	400	GE1	12	3	m3	MedAnterior	5	14
m	1	4	24	73.3252	4	5	400	GE1	12	3	m3	MedAnterior	5	14
m	1	5	25	77.6848	4	5	400	GE1	12	3	m3	MedAnterior	5	14
m	1	5	26	49.9318	4	5	400	GE1	12	3	m3	MedAnterior	5	14
m	1	7	16	71.9974	4	5	400	GE1	12	3	m3	MedAnterior	5	14
m	1	7	17	84.7651	4	5	400	GE1	12	3	m3	MedAnterior	5	14
m	1	7	18	70.752	4	5	400	GE1	12	3	m3	MedAnterior	5	14
m	1	10	10	104.908	4	5	400	GE1	12	3	m3	MedAnterior	5	14
m	1	10	11	86.4654	4	5	400	GE1	12	3	m3	MedAnterior	5	14
f	0	3	16	29.1656	1	1	45	GE2	9	4/5	m4/5	MedAnterior	5	15
f	0	3	17	64.5354	1	1	45	GE2	9	4/5	m4/5	MedAnterior	5	15
f	0	3	18	85.2443	1	1	45	GE2	9	4/5	m4/5	MedAnterior	5	15
f	0	3	19	59.8316	1	1	45	GE2	9	4/5	m4/5	MedAnterior	5	15
f	0	4	32	183.242	1	1	45	GE2	10	4/5	m4/5	MedAnterior	5	15
f	0	4	33	95.6255	1	1	45	GE2	10	4/5	m4/5	MedAnterior	5	15
f	0	4	34	67.4242	1	1	45	GE2	10	4/5	m4/5	MedAnterior	5	15
f	0	4	35	130.873	1	1	45	GE2	10	4/5	m4/5	MedAnterior	5	15
f	0	4	36		1	1	45	GE2	10	4/5	m4/5	MedAnterior	5	15
f	0	4	37		1	1	45	GE2	10	4/5	m4/5	MedAnterior	5	15
f	0	12	17	66.1347	1	1	45	GE2	12	4/5	m4/5	MedAnterior	5	15
f	0	12	18	153.469	1	1	45	GE2	12	4/5	m4/5	MedAnterior	5	15
f	0	12	19	91.8434	1	1	45	GE2	12	4/5	m4/5	MedAnterior	5	15
f	0	13	15	106.752	1	1	45	GE2	12	4/5	m4/5	MedAnterior	5	15
f	0	13	16		1	1	45	GE2	12	4/5	m4/5	MedAnterior	5	15
f	0	13	17	117.073	1	1	45	GE2	12	4/5	m4/5	MedAnterior	5	15
f	0	13	18	47.351	1	1	45	GE2	12	4/5	m4/5	MedAnterior	5	15
m	1	1	32	90.6509	1	1	45	GE2	9	4/5	m4/5	MedAnterior	5	15
m	1	1	33	117.293	1	1	45	GE2	9	4/5	m4/5	MedAnterior	5	15
m	1	1	34	133.228	1	1	45	GE2	9	4/5	m4/5	MedAnterior	5	15
m	1	2	29	45.2858	1	1	45	GE2	11	4/5	m4/5	MedAnterior	5	15
m	1	2	30	36.5434	1	1	45	GE2	11	4/5	m4/5	MedAnterior	5	15
m	1	2	31	76.8297	1	1	45	GE2	11	4/5	m4/5	MedAnterior	5	15
m	1	2	32	68.0688	1	1	45	GE2	11	4/5	m4/5	MedAnterior	5	15
m	1	2	33	98.9592	1	1	45	GE2	11	4/5	m4/5	MedAnterior	5	15
m	1	5	21	61.7075	1	1	45	GE2	11	4/5	m4/5	MedAnterior	5	15
m	1	5	22	89.8506	1	1	45	GE2	11	4/5	m4/5	MedAnterior	5	15
m	1	5	23	21.432	1	1	45	GE2	11	4/5	m4/5	MedAnterior	5	15
f	0	10	11	107.669	2	1	120	GE3	11	4/5	m4/5	MedAnterior	5	15
f	0	10	12	178.99	2	1	120	GE3	11	4/5	m4/5	MedAnterior	5	15
f	0	11	14	103.09	2	1	120	GE3	12	4/5	m4/5	MedAnterior	5	15
f	0	11	15		2	1	120	GE3	12	4/5	m4/5	MedAnterior	5	15
f	0	11	16	103.749	2	1	120	GE3	12	4/5	m4/5	MedAnterior	5	15
f	0	18		47.3092	2	1	120	GE3	12	4/5	m4/5	MedAnterior	5	15
f	0	18			2	1	120	GE3	12	4/5	m4/5	MedAnterior	5	15
f	0	18		103.3	2	1	120	GE3	12	4/5	m4/5	MedAnterior	5	15
f	0	19	21	68.4548	2	1	120	GE3	11	4/5	m4/5	MedAnterior	5	15
f	0	19	22	103.298	2	1	120	GE3	11	4/5	m4/5	MedAnterior	5	15
f	0	19	23	168.344	2	1	120	GE3	11	4/5	m4/5	MedAnterior	5	15
m	1	6	20	103.551	2	1	120	GE3	12	4/5	m4/5	MedAnterior	5	15
m	1	6	21	66.7152	2	1	120	GE3	12	4/5	m4/5	MedAnterior	5	15
m	1	6	22	77.7899	2	1	120	GE3	12	4/5	m4/5	MedAnterior	5	15
m	1	7	20	59.5377	2	1	120	GE3	11	4/5	m4/5	MedAnterior	5	15
m	1	7	21	57.642	2	1	120	GE3	11	4/5	m4/5	MedAnterior	5	15
m	1	8	14	90.5813	2	1	120	GE3	11	4/5	m4/5	MedAnterior	5	15
m	1	8	15	95.1019	2	1	120	GE3	11	4/5	m4/5	MedAnterior	5	15
m	1	8	16	93.0071	2	1	120	GE3	11	4/5	m4/5	MedAnterior	5	15
m	1	8	17	67.1775	2	1	120	GE3	11	4/5	m4/5	MedAnterior	5	15
m	1	9	25		2	1	120	GE3	11	4/5	m4/5	MedAnterior	5	15
m	1	9	26	147.818	2	1	120	GE3	11	4/5	m4/5	MedAnterior	5	15
m	1	9	27	88.8398	2	1	120	GE3	11	4/5	m4/5	MedAnterior	5	15
f	0	14	15		3	1	210	GE4	12	4/5	m4/5	MedAnterior	5	15
f	0	14	16	24.1045	3	1	210	GE4	12	4/5	m4/5	MedAnterior	5	15
f	0	14	17	154.338	3	1	210	GE4	12	4/5	m4/5	MedAnterior	5	15
f	0	15	15	74.1226	3	1	210	GE4	12	4/5	m4/5	MedAnterior	5	15
f	0	15	16	84.5727	3	1	210	GE4	12	4/5	m4/5	MedAnterior	5	15
f	0	15	17	59.9681	3	1	210	GE4	12	4/5	m4/5	MedAnterior	5	15
f	0	27		78.4758	3	1	210	GE4	12	4/5	m4/5	MedAnterior	5	15
f	0	27		111.759	3	1	210	GE4	12	4/5	m4/5	MedAnterior	5	15
f	0	27		137.511	3	1	210	GE4	12	4/5	m4/5	MedAnterior	5	15
f	0	28	15	27.1115	3	1	210	GE4	12	4/5	m4/5	MedAnterior	5	15
f	0	28	16	156.972	3	1	210	GE4	12	4/5	m4/5	MedAnterior	5	15
f	0	28	17	119.639	3	1	210	GE4	12	4/5	m4/5	MedAnterior	5	15
m	1	16	15	107.166	3	1	210	GE4	11	4/5	m4/5	MedAnterior	5	15
m	1	16	16		3	1	210	GE4	11	4/5	m4/5	MedAnterior	5	15
m	1	16	17	89.3769	3	1	210	GE4	11	4/5	m4/5	MedAnterior	5	15
m	1	17	20	126.557	3	1	210	GE4	11	4/5	m4/5	MedAnterior	5	15
m	1	17	21	92.4506	3	1	210	GE4	11	4/5	m4/5	MedAnterior	5	15
m	1	17	22	93.634	3	1	210	GE4	11	4/5	m4/5	MedAnterior	5	15
m	1	29		124.654	3	1	210	GE4	12		m4/5	MedAnterior	5	15
m	1	29		145.165	3	1	210	GE4	12		m4/5	MedAnterior	5	15
m	1	29		105.744	3	1	210	GE4	12		m4/5	MedAnterior	5	15
f	0	23		54.148	4	1	400	GE1	12	4/5	m4/5	MedAnterior	5	15
f	0	23		158.168	4	1	400	GE1	12	4/5	m4/5	MedAnterior	5	15
f	0	23		93.8131	4	1	400	GE1	12	4/5	m4/5	MedAnterior	5	15
f	0	24	17	82.3819	4	1	400	GE1	12	4/5	m4/5	MedAnterior	5	15
f	0	24	18	119.675	4	1	400	GE1	12	4/5	m4/5	MedAnterior	5	15
f	0	24	19	102.574	4	1	400	GE1	12	4/5	m4/5	MedAnterior	5	15
f	0	25	17	167.923	4	1	400	GE1	12	4/5	m4/5	MedAnterior	5	15
f	0	25	18	236.225	4	1	400	GE1	12	4/5	m4/5	MedAnterior	5	15
f	0	25	19	88.4909	4	1	400	GE1	12	4/5	m4/5	MedAnterior	5	15
f	0	26	17	147.268	4	1	400	GE1	12	4/5	m4/5	MedAnterior	5	15
f	0	26	18	129.58	4	1	400	GE1	12	4/5	m4/5	MedAnterior	5	15
f	0	26	19	59.8853	4	1	400	GE1	12	4/5	m4/5	MedAnterior	5	15
m	1	20	19	92.6465	4	1	400	GE1	12	4/5	m4/5	MedAnterior	5	15
m	1	20	20	98.8868	4	1	400	GE1	12	4/5	m4/5	MedAnterior	5	15
m	1	20	21	89.9189	4	1	400	GE1	12	4/5	m4/5	MedAnterior	5	15
m	1	21	14	105.221	4	1	400	GE1	12	4/5	m4/5	MedAnterior	5	15
m	1	21	15	134.034	4	1	400	GE1	12	4/5	m4/5	MedAnterior	5	15
m	1	22	17	139.992	4	1	400	GE1	12	4/5	m4/5	MedAnterior	5	15
m	1	22	18	73.0192	4	1	400	GE1	12	4/5	m4/5	MedAnterior	5	15
m	1	22	19		4	1	400	GE1	12	4/5	m4/5	MedAnterior	5	15
f	0	1	22	58.7164	1	2	45	GE2	9	4/5	m4/5	MedAnterior	5	15
f	0	1	24	61.5314	1	2	45	GE2	9	4/5	m4/5	MedAnterior	5	15
f	0	2	22	85.6808	1	2	45	GE2	9	4/5	m4/5	MedAnterior	5	15
f	0	2	23	86.1987	1	2	45	GE2	9	4/5	m4/5	MedAnterior	5	15
f	0	2	24	15.6708	1	2	45	GE2	9	4/5	m4/5	MedAnterior	5	15
f	0	7	19	22.3704	1	2	45	GE2	10	4/5	m4/5	MedAnterior	5	15
f	0	7	20	94.6054	1	2	45	GE2	10	4/5	m4/5	MedAnterior	5	15
f	0	7	21	43.3439	1	2	45	GE2	10	4/5	m4/5	MedAnterior	5	15
f	0	7	22	37.1696	1	2	45	GE2	10	4/5	m4/5	MedAnterior	5	15
f	0	22		66.2969	1	2	45	GE2	12	4/5	m4/5	MedAnterior	5	15
f	0	22		19.6051	1	2	45	GE2	12	4/5	m4/5	MedAnterior	5	15
f	0	22		74.8037	1	2	45	GE2	12	4/5	m4/5	MedAnterior	5	15
m	1	3	26	12.4086	1	2	45	GE2	9	4/5	m4/5	MedAnterior	5	15
m	1	3	27	21.6885	1	2	45	GE2	9	4/5	m4/5	MedAnterior	5	15
m	1	3	28	30.5925	1	2	45	GE2	9	4/5	m4/5	MedAnterior	5	15
m	1	3	29	46.7114	1	2	45	GE2	9	4/5	m4/5	MedAnterior	5	15
m	1	3	30	14.9503	1	2	45	GE2	9	4/5	m4/5	MedAnterior	5	15
m	1	4	33	38.2345	1	2	45	GE2	9	4/5	m4/5	MedAnterior	5	15
m	1	4	34	33.6611	1	2	45	GE2	9	4/5	m4/5	MedAnterior	5	15
m	1	4	35	47.3705	1	2	45	GE2	9	4/5	m4/5	MedAnterior	5	15
m	1	4	36	26.8623	1	2	45	GE2	9	4/5	m4/5	MedAnterior	5	15
m	1	4	37	49.5579	1	2	45	GE2	9	4/5	m4/5	MedAnterior	5	15
m	1	4	38	83.1916	1	2	45	GE2	9	4/5	m4/5	MedAnterior	5	15
m	1	4	39	91.6619	1	2	45	GE2	9	4/5	m4/5	MedAnterior	5	15
m	1	5	25	95.675	1	2	45	GE2	10	4/5	m4/5	MedAnterior	5	15
m	1	5	26	101.156	1	2	45	GE2	10	4/5	m4/5	MedAnterior	5	15
m	1	5	27	61.4217	1	2	45	GE2	10	4/5	m4/5	MedAnterior	5	15
m	1	6	24	45.773	1	2	45	GE2	11	4/5	m4/5	MedAnterior	5	15
m	1	6	25	49.5038	1	2	45	GE2	11	4/5	m4/5	MedAnterior	5	15
m	1	6	26	61.5573	1	2	45	GE2	11	4/5	m4/5	MedAnterior	5	15
f	0	8	17	32.6397	2	2	120	GE3	10	4/5	m4/5	MedAnterior	5	15
f	0	8	18	79.9029	2	2	120	GE3	10	4/5	m4/5	MedAnterior	5	15
f	0	8	19	33.5359	2	2	120	GE3	10	4/5	m4/5	MedAnterior	5	15
f	0	8	20	61.9259	2	2	120	GE3	10	4/5	m4/5	MedAnterior	5	15
f	0	10		74.4941	2	2	120	GE3	11	4/5	m4/5	MedAnterior	5	15
f	0	10		32.301	2	2	120	GE3	11	4/5	m4/5	MedAnterior	5	15
f	0	10		49.2635	2	2	120	GE3	11	4/5	m4/5	MedAnterior	5	15
f	0	11		23.8449	2	2	120	GE3	11	4/5	m4/5	MedAnterior	5	15
f	0	11		11.2919	2	2	120	GE3	11	4/5	m4/5	MedAnterior	5	15
f	0	12	26	126.863	2	2	120	GE3	10	4/5	m4/5	MedAnterior	5	15
f	0	12	27	61.7596	2	2	120	GE3	10	4/5	m4/5	MedAnterior	5	15
f	0	12	28	31.3638	2	2	120	GE3	10	4/5	m4/5	MedAnterior	5	15
m	1	9	12	32.3948	2	2	120	GE3	11	4/5	m4/5	MedAnterior	5	15
m	1	9	13	87.2166	2	2	120	GE3	11	4/5	m4/5	MedAnterior	5	15
m	1	9	14	89.6916	2	2	120	GE3	11	4/5	m4/5	MedAnterior	5	15
m	1	13	18	4.93361	2	2	120	GE3	11	4/5	m4/5	MedAnterior	5	15
m	1	14	24	49.1294	2	2	120	GE3	13	4/5	m4/5	MedAnterior	5	15
m	1	14	25	45.5573	2	2	120	GE3	13	4/5	m4/5	MedAnterior	5	15
m	1	19		58.7025	2	2	120	GE3	12	4/5	m4/5	MedAnterior	5	15
m	1	19		102.283	2	2	120	GE3	12	4/5	m4/5	MedAnterior	5	15
m	1	19		137.452	2	2	120	GE3	12	4/5	m4/5	MedAnterior	5	15
f	0	15	17	47.2535	3	2	210	GE4	12	4/5	m4/5	MedAnterior	5	15
f	0	15	18	56.0762	3	2	210	GE4	12	4/5	m4/5	MedAnterior	5	15
f	0	15	19	22.9383	3	2	210	GE4	12	4/5	m4/5	MedAnterior	5	15
m	1	17	28	13.4893	3	2	210	GE4	12	4/5	m4/5	MedAnterior	5	15
m	1	17	29	54.6872	3	2	210	GE4	12	4/5	m4/5	MedAnterior	5	15
m	1	20		42.878	3	2	210	GE4	11	4/5	m4/5	MedAnterior	5	15
m	1	20		69.4037	3	2	210	GE4	11	4/5	m4/5	MedAnterior	5	15
m	1	20		49.4908	3	2	210	GE4	11	4/5	m4/5	MedAnterior	5	15
m	1	21		43.4466	3	2	210	GE4	11	4/5	m4/5	MedAnterior	5	15
m	1	21		53.2219	3	2	210	GE4	11	4/5	m4/5	MedAnterior	5	15
m	1	21		48.5243	3	2	210	GE4	11	4/5	m4/5	MedAnterior	5	15
f	0	16		47.6754	4	2	400	GE1	12	4/5	m4/5	MedAnterior	5	15
f	0	16		86.3782	4	2	400	GE1	12	4/5	m4/5	MedAnterior	5	15
m	1	18	21	39.1289	4	2	400	GE1	12	4/5	m4/5	MedAnterior	5	15
m	1	18	22	82.5613	4	2	400	GE1	12	4/5	m4/5	MedAnterior	5	15
m	1	18	23	37.5056	4	2	400	GE1	12	4/5	m4/5	MedAnterior	5	15
m	1	23		56.7032	4	2	400	GE1	12	4/5	m4/5	MedAnterior	5	15
m	1	23		60.8508	4	2	400	GE1	12	4/5	m4/5	MedAnterior	5	15
m	1	23		44.2754	4	2	400	GE1	12	4/5	m4/5	MedAnterior	5	15
f	0	15		63.5748	1	3	45	GE2	12	4/5	m4/5	MedAnterior	5	15
f	0	15		66.5268	1	3	45	GE2	12	4/5	m4/5	MedAnterior	5	15
f	0	15		59.3841	1	3	45	GE2	12	4/5	m4/5	MedAnterior	5	15
f	0	17		78.7321	1	3	45	GE2	11	4/5	m4/5	MedAnterior	5	15
f	0	17		64.6942	1	3	45	GE2	11	4/5	m4/5	MedAnterior	5	15
f	0	18	13	27.0782	1	3	45	GE2	11	4/5	m4/5	MedAnterior	5	15
f	0	18	14	64.5439	1	3	45	GE2	11	4/5	m4/5	MedAnterior	5	15
f	0	18	15	157.259	1	3	45	GE2	11	4/5	m4/5	MedAnterior	5	15
m	1	2	11	91.9631	1	3	45	GE2	12	4/5	m4/5	MedAnterior	5	15
m	1	2	12	139.973	1	3	45	GE2	12	4/5	m4/5	MedAnterior	5	15
m	1	3		64.0173	1	3	45	GE2	12	4/5	m4/5	MedAnterior	5	15
m	1	3		74.4023	1	3	45	GE2	12	4/5	m4/5	MedAnterior	5	15
m	1	3		88.1895	1	3	45	GE2	12	4/5	m4/5	MedAnterior	5	15
m	1	9	14	109.625	1	3	45	GE2	11	4/5	m4/5	MedAnterior	5	15
m	1	9	15	131.393	1	3	45	GE2	11	4/5	m4/5	MedAnterior	5	15
m	1	9	16	131.896	1	3	45	GE2	11	4/5	m4/5	MedAnterior	5	15
m	1	10	14	128.175	1	3	45	GE2	12	4/5	m4/5	MedAnterior	5	15
m	1	10	15	146.671	1	3	45	GE2	12	4/5	m4/5	MedAnterior	5	15
m	1	10	16	86.0043	1	3	45	GE2	12	4/5	m4/5	MedAnterior	5	15
f	0	1	14	39.8438	2	3	120	GE3	12	4/5	m4/5	MedAnterior	5	15
f	0	1	15	117.121	2	3	120	GE3	12	4/5	m4/5	MedAnterior	5	15
f	0	1	16	104.449	2	3	120	GE3	12	4/5	m4/5	MedAnterior	5	15
m	1	5		25.4714	2	3	120	GE3	12	4/5	m4/5	MedAnterior	5	15
m	1	5		133.294	2	3	120	GE3	12	4/5	m4/5	MedAnterior	5	15
m	1	5		81.5129	2	3	120	GE3	12	4/5	m4/5	MedAnterior	5	15
m	1	6		82.6422	2	3	120	GE3	12	4/5	m4/5	MedAnterior	5	15
m	1	6		132.434	2	3	120	GE3	12	4/5	m4/5	MedAnterior	5	15
m	1	6		89.1375	2	3	120	GE3	12	4/5	m4/5	MedAnterior	5	15
m	1	7		86.0035	2	3	120	GE3	12	4/5	m4/5	MedAnterior	5	15
m	1	7		114.985	2	3	120	GE3	12	4/5	m4/5	MedAnterior	5	15
m	1	7		83.0022	2	3	120	GE3	12	4/5	m4/5	MedAnterior	5	15
m	1	19		96.1625	2	3	120	GE3	12	4/5	m4/5	MedAnterior	5	15
m	1	19		43.109	2	3	120	GE3	12	4/5	m4/5	MedAnterior	5	15
m	1	23		25.9631	2	3	120	GE3	1900-01-12	4/5	m4/5	MedAnterior	5	15
m	1	23		95.2811	2	3	120	GE3	1900-01-12	4/5	m4/5	MedAnterior	5	15
m	1	23		50.0652	2	3	120	GE3	1900-01-12	4/5	m4/5	MedAnterior	5	15
f	0	16	17	65.7102	3	3	210	GE4	11	4/5	m4/5	MedAnterior	5	15
f	0	16	18	89.3985	3	3	210	GE4	11	4/5	m4/5	MedAnterior	5	15
f	0	16	19	90.1954	3	3	210	GE4	11	4/5	m4/5	MedAnterior	5	15
f	0	20		171.743	3	3	210	GE4	11	4/5	m4/5	MedAnterior	5	15
f	0	20		98.6329	3	3	210	GE4	11	4/5	m4/5	MedAnterior	5	15
f	0	20		104.124	3	3	210	GE4	11	4/5	m4/5	MedAnterior	5	15
f	0	21	16	138.06	3	3	210	GE4	11	4/5	m4/5	MedAnterior	5	15
f	0	21	17		3	3	210	GE4	11	4/5	m4/5	MedAnterior	5	15
f	0	21	18	56.9019	3	3	210	GE4	11	4/5	m4/5	MedAnterior	5	15
m	1	4		114.531	3	3	210	GE4	11	4/5	m4/5	MedAnterior	5	15
m	1	4		96.015	3	3	210	GE4	11	4/5	m4/5	MedAnterior	5	15
m	1	4		132.171	3	3	210	GE4	11	4/5	m4/5	MedAnterior	5	15
m	1	8		20.3203	3	3	210	GE4	12	4/5	m4/5	MedAnterior	5	15
m	1	8			3	3	210	GE4	12	4/5	m4/5	MedAnterior	5	15
m	1	8		76.8772	3	3	210	GE4	12	4/5	m4/5	MedAnterior	5	15
m	1	11	16	177.917	3	3	210	GE4	12	4/5	m4/5	MedAnterior	5	15
m	1	11	17	118.041	3	3	210	GE4	12	4/5	m4/5	MedAnterior	5	15
m	1	11	18	39.635	3	3	210	GE4	12	4/5	m4/5	MedAnterior	5	15
f	0	13		175.042	4	3	400	GE1	12	4/5	m4/5	MedAnterior	5	15
f	0	13		154.363	4	3	400	GE1	12	4/5	m4/5	MedAnterior	5	15
f	0	14		80.8622	4	3	400	GE1	11	4/5	m4/5	MedAnterior	5	15
f	0	14		99.2218	4	3	400	GE1	11	4/5	m4/5	MedAnterior	5	15
f	0	14		93.3554	4	3	400	GE1	11	4/5	m4/5	MedAnterior	5	15
f	0	25	20	110.506	4	3	400	GE1	1900-01-12	4/5	m4/5	MedAnterior	5	15
f	0	25	21	48.7885	4	3	400	GE1	1900-01-12	4/5	m4/5	MedAnterior	5	15
f	0	25	22	73.8626	4	3	400	GE1	1900-01-12	4/5	m4/5	MedAnterior	5	15
m	1	12		65.0682	4	3	400	GE1	12	4/5	m4/5	MedAnterior	5	15
m	1	12		95.6376	4	3	400	GE1	12	4/5	m4/5	MedAnterior	5	15
m	1	12		107.948	4	3	400	GE1	12	4/5	m4/5	MedAnterior	5	15
m	1	22		122.268	4	3	400	GE1	12	4/5	m4/5	MedAnterior	5	15
m	1	22		104.698	4	3	400	GE1	12	4/5	m4/5	MedAnterior	5	15
m	1	22		59.2099	4	3	400	GE1	12	4/5	m4/5	MedAnterior	5	15
m	1	24		29.2489	4	3	400	GE1	1900-01-11	4/5	m4/5	MedAnterior	5	15
m	1	24		68.03	4	3	400	GE1	1900-01-11	4/5	m4/5	MedAnterior	5	15
m	1	26	24	105.979	4	3	400	GE1	1900-01-12	4/5	m4/5	MedAnterior	5	15
m	1	26	25	74.1509	4	3	400	GE1	1900-01-12	4/5	m4/5	MedAnterior	5	15
m	1	26	26	146.2	4	3	400	GE1	1900-01-12	4/5	m4/5	MedAnterior	5	15
f	0	2	43	122.45	1	4	45	GE2	10	4/5	m4/5	MedAnterior	5	15
[truncated: 1,358 more rows]
