# Supplementary material for: A novel, ataxic mouse model of ataxia telangiectasia caused by a clinically relevant nonsense mutation
Source: eLife journal article supplement (doi:10.7554/elife.64695), 2021-11-01
Supplement: fig4-data1 [file Figure 5-CV.xlsx]

## Sheet: AtmWt Wt; Aptx+ +
AtmWt/Wt; Aptx+/+			Total # of animals	29
Genotype	sex	sex code (1=m)	sex code (1=m)	Exp. Date_Animal ID	CV	CV	Group	Age	Age days	slice	folia	Position name	Region name	Gross Region ID	Position ID
1	m	1	1	190114_1011	0.543925	0.543925	GE2	1	45	3	pm	Lpm	Lateral	2	6		All time points		N	29									m					f
1	m	1	1	2	0.936346	0.936346	GE2	1	45	3	pm	Lpm	Lateral	2	6		By Position ID	average	stdev	n	sem		By major regions	average	stdev	n	sem		average	stdev	n	sem		average	stdev	n	sem
1	m	1	1	3	0.706726	0.706726	GE2	1	45	3	pm	Lpm	Lateral	2	6		Lpfl	0.347101	0.432305	19	0.0991775	1	Vestibular	0.375588	0.68405	34	0.117314	1	0.326801	0.482842	16	0.12071		0.418955	0.835694	18	0.196975
1	m	1	1	4	0.220588	0.220588	GE2	1	45	3	crus2	Lcrus2	Lateral	2	5		Lfl	0.411673	0.927462	15	0.23947	2	Lateral	0.510942	0.566187	98	0.0571935	2	0.526296	0.575535	50	0.0813929		0.494949	0.561916	48	0.0811057
1	m	1	1	5	0.107693	0.107693	GE2	1	45	3	crus2	Lcrus2	Lateral	2	5		Lsim	0.665751	0.891659	20	0.199381	3	IntAnterior	0.553523	0.761476	25	0.152295	3	0.626743	0.830567	17	0.201442		0.397931	0.608749	8	0.215225
1	m	1	1	6	0.214141	0.214141	GE2	1	45	3	crus2	Lcrus2	Lateral	2	5		Lcrus1	0.529785	0.558847	33	0.0972828	4	IntPosterior	0.305274	0.424435	100	0.0424435	4	0.226445	0.165774	51	0.023213		0.38732	0.573976	49	0.0819965
1	m	1	1	7	0.163355	0.163355	GE2	1	45	3	crus1	Lcrus1	Lateral	2	4		Lcrus2	0.399393	0.352138	24	0.0718799	5	MedAnterior	0.216704	0.852568	224	0.0569646	5	0.169266	0.118021	100	0.0118021		0.25496	1.14163	124	0.102521
1	m	1	1	8	0.0574895	0.0574895	GE2	1	45	7	10	i10	intposterior	4	#N/A		Lpm	0.455683	0.347031	20	0.0775984	6	MedPosterior	0.130623	0.111287	277	0.00668658	6	0.133096	0.0884185	117	0.00817429		0.128815	0.125645	160	0.00993312
1	m	1	1	9	0.0899328	0.0899328	GE2	1	45	7	10	i10	intposterior	4	#N/A		isim	0.558678	0.74128	21	0.161761	7
1	m	1	1	10	0.112704	0.112704	GE2	1	45	7	10	i10	intposterior	4	#N/A		icrus1	0.178521	0.119092	18	0.0280702	8
1	m	1	1	11	0.169352	0.169352	GE2	1	45	7	10	i10	intposterior	4	#N/A		icrus2	0.259817	0.175277	21	0.0382487	9
1	m	1	1	12	0.0480121	0.0480121	GE2	1	45	7	9	i9	intposterior	4	#N/A		ipm	0.358314	0.514576	14	0.137526	10
1	m	1	1	13	0.1587	0.1587	GE2	1	45	7	9	i9	intposterior	4	#N/A		icop	0.279019	0.172415	12	0.049772	11
1	m	1	1	14	0.114141	0.114141	GE2	1	45	7	9	i9	intposterior	4	#N/A		i4/5	0.62154	0.832905	18	0.196318	12
1	m	1	1	15	0.142443	0.142443	GE2	1	45	7	8	i8	intposterior	4	#N/A		m2	0.133578	0.107951	67	0.0131883	13
1	m	1	1	16	0.110878	0.110878	GE2	1	45	7	8	i8	intposterior	4	#N/A		m3	0.167591	0.0798254	72	0.00940751	14
1	m	1	1	17	0.146117	0.146117	GE2	1	45	7	8	i8	intposterior	4	#N/A		m4/5	0.323829	1.37693	85	0.149349	15
1	m	1	1	18	0.118054	0.118054	GE2	1	45	7	7	i7	intposterior	4	#N/A		m6	0.159381	0.177332	62	0.0225212	16
1	m	1	1	19	0.132552	0.132552	GE2	1	45	7	6	i6	intposterior	4	#N/A		m7	0.167587	0.091454	21	0.0199569	17
1	m	1	1	20	0.0865128	0.0865128	GE2	1	45	7	6	i6	intposterior	4	#N/A		m8	0.13043	0.0679714	58	0.00892508	18
1	m	1	1	21	0.123913	0.123913	GE2	1	45	7	4/5	i4/5	IntAnterior	3	12		m9	0.117136	0.0877604	77	0.0100012	19
1	m	1	1	22	0.0899691	0.0899691	GE2	1	45	7	3	i3	intanterior	3	#N/A		m10	0.105038	0.0778349	59	0.0101332	20
1	m	1	1	23	0.0521996	0.0521996	GE2	1	45	9	10	m10	MedPosterior	6	20
1	m	1	1	24	0.110365	0.110365	GE2	1	45	9	10	m10	MedPosterior	6	20
1	m	1	1	25	0.0915696	0.0915696	GE2	1	45	9	9	m9	MedPosterior	6	19
1	m	1	1	26	0.104884	0.104884	GE2	1	45	9	8	m8	MedPosterior	6	18
1	m	1	1	27	0.190109	0.190109	GE2	1	45	9	8	m8	MedPosterior	6	18
1	m	1	1	28	0.0457459	0.0457459	GE2	1	45	9	8	m8	MedPosterior	6	18
1	m	1	1	29	0.118041	0.118041	GE2	1	45	9	6	m6	MedPosterior	6	16
1	m	1	1	30	0.158164	0.158164	GE2	1	45	9	6	m6	MedPosterior	6	16
1	m	1	1	31	0.115714	0.115714	GE2	1	45	9	6	m6	MedPosterior	6	16
1	m	1	1	32	0.12667	0.12667	GE2	1	45	9	4/5	m4/5	MedAnterior	5	15
1	m	1	1	33	0.2546	0.2546	GE2	1	45	9	4/5	m4/5	MedAnterior	5	15
1	m	1	1	34	0.15127	0.15127	GE2	1	45	9	4/5	m4/5	MedAnterior	5	15
1	m	1	1	35	0.150255	0.150255	GE2	1	45	9	3	m3	MedAnterior	5	14
1	m	1	1	36	0.0921927	0.0921927	GE2	1	45	9	3	m3	MedAnterior	5	14
1	m	1	1	37	0.0890002	0.0890002	GE2	1	45	9	2	m2	MedAnterior	5	13
1	m	1	1	38	0.0578959	0.0578959	GE2	1	45	9	2	m2	MedAnterior	5	13
1	m	1	1	39	0.0465746	0.0465746	GE2	1	45	9	2	m2	MedAnterior	5	13
1	m	1	2	190115_1012	0.930696	0.930696	GE2	1	45	4	pm	Lpm	Lateral	2	6
1	m	1	2	2	0.389526	0.389526	GE2	1	45	4	crus2	Lcrus2	Lateral	2	5		GE2	45 days	N	7									m					f
1	m	1	2	3	0.637887	0.637887	GE2	1	45	4	crus1	Lcrus1	Lateral	2	4		By Position ID	average	stdev	n	sem		By major regions	average	stdev	n	sem		average	stdev	n	sem		average	stdev	n	sem
1	m	1	2	4	0.371053	0.371053	GE2	1	45	4	crus1	Lcrus1	Lateral	2	4		Lpfl	0.0982222	#DIV/0!	1	#DIV/0!		Vestibular	0.0982222	#DIV/0!	1	#DIV/0!		#DIV/0!	#DIV/0!	0	#DIV/0!		0.0982222	#DIV/0!	1	#DIV/0!			2.38413
1	m	1	2	5	2.66372	2.66372	GE2	1	45	4	crus1	Lcrus1	Lateral	2	4		Lfl	#DIV/0!	#DIV/0!	0	#DIV/0!		Lateral	0.498206	#VALUE!	36	#VALUE!		0.54439	0.586984	18	0.138353		0.452022	0.46457	18	0.1095			#DIV/0!
1	m	1	2	6	0.190814	0.190814	GE2	1	45	4	sim	Lsim	Lateral	2	3		Lsim	0.424171	0.300875	5	0.134555		IntAnterior	0.540175	0.882258	13	0.244694		0.70331	1.03338	9	0.34446		0.173124	0.0798423	4	0.0399211			0.62089
1	m	1	2	7	0.215458	0.215458	GE2	1	45	8	3	i3	intanterior	3	#N/A		Lcrus1	0.628679	0.869433	11	0.262144		IntPosterior	0.232986	0.188501	41	0.0294389		0.229506	0.198763	26	0.0389806		0.239019	0.175821	15	0.0453968			0.542301
1	m	1	2	8	0.171261	0.171261	GE2	1	45	8	3	i3	intanterior	3	#N/A		Lcrus2	0.378235	0.242199	11	0.0730258		MedAnterior	0.167194	0.09677	61	0.0123901		0.166943	0.113727	26	0.0223037		0.16738	0.083757	35	0.0141575			1.84664
1	m	1	2	9	1.62044	1.62044	GE2	1	45	8	3	i3	intanterior	3	#N/A		Lpm	0.520401	0.319028	8	0.112794		MedPosterior	0.12258	0.0621742	71	0.00737872		0.109468	0.0587489	30	0.010726		0.132174	0.0665103	41	0.0103872			0.29462
1	m	1	2	10	0.289131	0.289131	GE2	1	45	8	3	i3	intanterior	3	#N/A		isim	0.36372	0.334922	6	0.136732																			0.544858
1	m	1	2	11	0.516854	0.516854	GE2	1	45	8	4/5	i4/5	IntAnterior	3	12		icrus1	0.256697	0.140695	4	0.0703474																			0.493804
1	m	1	2	12	0.157235	0.157235	GE2	1	45	8	4/5	i4/5	IntAnterior	3	12		icrus2	0.258498	0.142467	7	0.0538476																			0.923924
1	m	1	2	13	3.14553	3.14553	GE2	1	45	8	4/5	i4/5	IntAnterior	3	12		ipm	0.187446	0.171888	4	0.0859441																			1.00496
1	m	1	2	14	0.737835	0.737835	GE2	1	45	8	sim	isim	IntPosterior	4	7		icop	0.337173	0.203531	6	0.0830913																			0.546304
1	m	1	2	15	0.404226	0.404226	GE2	1	45	8	crus2	icrus2	IntPosterior	4	9		i4/5	0.728653	1.19325	6	0.487143																			0.232842
1	m	1	2	16	0.117303	0.117303	GE2	1	45	8	crus2	icrus2	IntPosterior	4	9		m2	0.147345	0.122598	17	0.0297343																			0.927857
1	m	1	2	17	0.27413	0.27413	GE2	1	45	8	8	i8	intposterior	4	#N/A		m3	0.165458	0.073992	17	0.0179457																			0.99546
1	m	1	2	18	0.0593635	0.0593635	GE2	1	45	11	10	m10	MedPosterior	6	20		m4/5	0.180784	0.0924144	27	0.0177852																			0.720261
1	m	1	2	19	0.110669	0.110669	GE2	1	45	11	10	m10	MedPosterior	6	20		m6	0.136778	0.0664443	15	0.0171558																			1.35361
1	m	1	2	20	0.105064	0.105064	GE2	1	45	11	9	m9	MedPosterior	6	19		m7	0.183904	0.102543	5	0.0458588																			0.610971
1	m	1	2	21	0.0755405	0.0755405	GE2	1	45	11	9	m9	MedPosterior	6	19		m8	0.123396	0.0455916	17	0.0110576																			1.26213
1	m	1	2	22	0.0421346	0.0421346	GE2	1	45	11	9	m9	MedPosterior	6	19		m9	0.108135	0.0528031	20	0.0118071																			1.21013
1	m	1	2	23	0.09877	0.09877	GE2	1	45	11	9	m9	MedPosterior	6	19		m10	0.105111	0.0621468	14	0.0166094																			0.970746
1	m	1	2	24	0.10496	0.10496	GE2	1	45	11	8	m8	MedPosterior	6	18																									#DIV/0!
1	m	1	2	25	0.0697954	0.0697954	GE2	1	45	11	8	m8	MedPosterior	6	18																									#DIV/0!
1	m	1	2	26	0.0726663	0.0726663	GE2	1	45	11	7	m7	MedPosterior	6	17																									#DIV/0!
1	m	1	2	27	0.0620723	0.0620723	GE2	1	45	11	6	m6	MedPosterior	6	16																									#DIV/0!
1	m	1	2	28	0.108595	0.108595	GE2	1	45	11	6	m6	MedPosterior	6	16																									#DIV/0!
1	m	1	2	29	0.0885875	0.0885875	GE2	1	45	11	4/5	m4/5	MedAnterior	5	15																									#DIV/0!
1	m	1	2	30	0.169055	0.169055	GE2	1	45	11	4/5	m4/5	MedAnterior	5	15																									#DIV/0!
1	m	1	2	31	0.121551	0.121551	GE2	1	45	11	4/5	m4/5	MedAnterior	5	15																									#DIV/0!
1	m	1	2	32	0.146968	0.146968	GE2	1	45	11	4/5	m4/5	MedAnterior	5	15																									#DIV/0!
1	m	1	2	33	0.176947	0.176947	GE2	1	45	11	4/5	m4/5	MedAnterior	5	15																									#DIV/0!
1	m	1	2	34	0.0841884	0.0841884	GE2	1	45	11	3	m3	MedAnterior	5	14																									#DIV/0!
1	m	1	2	35	0.172877	0.172877	GE2	1	45	11	3	m3	MedAnterior	5	14																									#DIV/0!
1	m	1	2	36	0.126049	0.126049	GE2	1	45	11	2	m2	MedAnterior	5	13																									#DIV/0!
1	m	1	2	37	0.100775	0.100775	GE2	1	45	11	2	m2	MedAnterior	5	13																									#DIV/0!
1	m	1	2	38	0.0888783	0.0888783	GE2	1	45	11	2	m2	MedAnterior	5	13																									#DIV/0!
1	f	0	3	190408_1373	0.94234	0.94234	GE2	1	45	3	sim	Lsim	Lateral	2	3																									#DIV/0!
1	f	0	3	2	0.27026	0.27026	GE2	1	45	3	sim	Lsim	Lateral	2	3																									#DIV/0!
1	f	0	3	3	0.19369	0.19369	GE2	1	45	3	crus1	Lcrus1	Lateral	2	4																									#DIV/0!
1	f	0	3	4	0.236016	0.236016	GE2	1	45	3	crus2	Lcrus2	Lateral	2	5																									#DIV/0!
1	f	0	3	5	0.261154	0.261154	GE2	1	45	3	pm	Lpm	Lateral	2	6		GE3	120 days	N	8									m	N	4			f	N	4				#VALUE!
1	f	0	3	6	0.111899	0.111899	GE2	1	45	6	2	i2	intanterior	3	#N/A		By Position ID	average	stdev	n	sem		By major regions	average	stdev	n	sem		average	stdev	n	sem		average	stdev	n	sem			#VALUE!
1	f	0	3	7	0.152208	0.152208	GE2	1	45	6	3	i3	intanterior	3	#N/A		Lpfl	0.467918	0.46053	2	0.325644		Vestibular	0.760683	1.33499	7	0.504578		0.282791	0.285879	5	0.127849		1.95541	2.52381	2	1.7846			0.424518
1	f	0	3	8	0.138152	0.138152	GE2	1	45	6	4/5	i4/5	IntAnterior	3	12		Lfl	0.877789	1.60009	5	0.71558		Lateral	0.610679	0.682356	24	0.139285		0.568924	0.473818	13	0.131414		0.660026	0.892498	11	0.269098			0.0931672
1	f	0	3	9	0.106314	0.106314	GE2	1	45	6	crus1	icrus1	IntPosterior	4	8		Lsim	0.953327	1.18307	6	0.482986		IntAnterior	0.548156	0.752846	5	0.336683		0.195306	0.00413793	3	0.00238903		1.07743	1.15468	2	0.816486			0.302798
1	f	0	3	10	0.0817869	0.0817869	GE2	1	45	6	pm	ipm	IntPosterior	4	10		Lcrus1	0.473646	0.275666	8	0.0974628		IntPosterior	0.422183	0.687378	17	0.166714		0.244639	0.159347	11	0.0480449		0.747679	1.12459	6	0.45911			1.10211
1	f	0	3	11	0.125817	0.125817	GE2	1	45	6	pm	ipm	IntPosterior	4	10		Lcrus2	0.571464	0.608516	6	0.248425		MedAnterior	0.188769	0.120663	57	0.0159822		0.190171	0.104689	29	0.0194403		0.187317	0.137214	28	0.0259309			0.600049
1	f	0	3	12	0.115121	0.115121	GE2	1	45	6	cop	icop	IntPosterior	4	11		Lpm	0.429597	0.332818	4	0.166409		MedPosterior	0.14159	0.0881039	80	0.00985032		0.158238	0.101729	39	0.0162898		0.125754	0.0705111	41	0.011012			0.399443
1	f	0	3	13	0.0921897	0.0921897	GE2	1	45	9	2	m2	MedAnterior	5	13		isim	1.59871	1.95519	2	1.38253																			0.190664
1	f	0	3	14	0.150903	0.150903	GE2	1	45	9	3	m3	MedAnterior	5	14		icrus1	0.204153	0.176665	5	0.079007																			0.83526
1	f	0	3	15	0.16053	0.16053	GE2	1	45	9	3	m3	MedAnterior	5	14		icrus2	0.390628	0.280433	5	0.125413																			0.329515
1	f	0	3	16	0.291241	0.291241	GE2	1	45	9	4/5	m4/5	MedAnterior	5	15		ipm	0.218141	0.114151	2	0.0807167																			0.977126
1	f	0	3	17	0.104981	0.104981	GE2	1	45	9	4/5	m4/5	MedAnterior	5	15		icop	0.189838	0.118989	3	0.0686982																			2.08728
1	f	0	3	18	0.104418	0.104418	GE2	1	45	9	4/5	m4/5	MedAnterior	5	15		i4/5	0.548156	0.752846	5	0.336683																			0.544168
1	f	0	3	19	0.142143	0.142143	GE2	1	45	9	4/5	m4/5	MedAnterior	5	15		m2	0.131502	0.057102	16	0.0142755																			1.33619
1	f	0	3	20	0.238434	0.238434	GE2	1	45	9	6	m6	MedPosterior	6	16		m3	0.216861	0.0998477	21	0.0217885																			0.793701
1	f	0	3	21	0.0852703	0.0852703	GE2	1	45	9	6	m6	MedPosterior	6	16		m4/5	0.205085	0.161027	20	0.0360068																			1.17111
1	f	0	3	22	0.149982	0.149982	GE2	1	45	9	7	m7	MedPosterior	6	17		m6	0.126741	0.0571498	17	0.0138609																			1.5813
1	f	0	3	23	0.123016	0.123016	GE2	1	45	9	7	m7	MedPosterior	6	17		m7	0.225737	0.115195	6	0.0470281																			0.539188
1	f	0	3	24	0.150437	0.150437	GE2	1	45	9	8	m8	MedPosterior	6	18		m8	0.144616	0.0803332	19	0.0184297																			0.932309
1	f	0	3	25	0.116616	0.116616	GE2	1	45	9	8	m8	MedPosterior	6	18		m9	0.150815	0.108671	22	0.0231688																			0.959707
1	f	0	3	26	0.0821038	0.0821038	GE2	1	45	9	9	m9	MedPosterior	6	19		m10	0.109532	0.0661979	16	0.0165495																			1.17713
1	f	0	3	27	0.138873	0.138873	GE2	1	45	9	9	m9	MedPosterior	6	19																									#DIV/0!
1	f	0	3	28	0.101395	0.101395	GE2	1	45	9	10	m10	MedPosterior	6	20																									#DIV/0!
1	f	0	3	29	0.154105	0.154105	GE2	1	45	9	10	m10	MedPosterior	6	20																									#DIV/0!
1	f	0	4	190416_1374	0.104031	0.104031	GE2	1	45	2	pm	Lpm	Lateral	2	6																									#DIV/0!
1	f	0	4	2	0.463226	0.463226	GE2	1	45	2	pm	Lpm	Lateral	2	6																									#DIV/0!
1	f	0	4	3	0.213906	0.213906	GE2	1	45	2	crus2	Lcrus2	Lateral	2	5																									#DIV/0!
1	f	0	4	4	0.698452	0.698452	GE2	1	45	2	crus2	Lcrus2	Lateral	2	5																									#DIV/0!
1	f	0	4	5	2.00679	2.00679	GE2	1	45	2	crus1	Lcrus1	Lateral	2	4																									#DIV/0!
1	f	0	4	6	0.0629877	0.0629877	GE2	1	45	2	crus1	Lcrus1	Lateral	2	4																									#DIV/0!
1	f	0	4	7	0.219321	0.219321	GE2	1	45	2	crus1	Lcrus1	Lateral	2	4																									#DIV/0!
1	f	0	4	8	0.417425	0.417425	GE2	1	45	2	sim	Lsim	Lateral	2	3																									#DIV/0!
1	f	0	4	9	0.0982222	0.0982222	GE2	1	45	2	pfl	Lpfl	Vestibular	1	1																									#DIV/0!
1	f	0	4	10	0.539457	0.539457	GE2	1	45	6	cop	icop	IntPosterior	4	11																									#DIV/0!
1	f	0	4	11	0.153136	0.153136	GE2	1	45	6	cop	icop	IntPosterior	4	11																									#DIV/0!
1	f	0	4	12	0.0983458	0.0983458	GE2	1	45	6	pm	ipm	IntPosterior	4	10																									#DIV/0!
1	f	0	4	13	0.117897	0.117897	GE2	1	45	6	crus2	icrus2	IntPosterior	4	9																									#DIV/0!
1	f	0	4	14	0.413527	0.413527	GE2	1	45	6	crus1	icrus1	IntPosterior	4	8																									#DIV/0!
1	f	0	4	15	0.104354	0.104354	GE2	1	45	6	sim	isim	IntPosterior	4	7																									#DIV/0!
1	f	0	4	16	0.138575	0.138575	GE2	1	45	10	10	m10	MedPosterior	6	20		GE4	210 days	N	7									m	N	3			f	N	4				#VALUE!
1	f	0	4	17	0.0900272	0.0900272	GE2	1	45	10	10	m10	MedPosterior	6	20		By Position ID	average	stdev	n	sem		By major regions	average	stdev	n	sem		average	stdev	n	sem		average	stdev	n	sem			#VALUE!
1	f	0	4	18	0.0714966	0.0714966	GE2	1	45	10	9	m9	MedPosterior	6	19		Lpfl	0.459348	0.626291	8	0.221427		Vestibular	0.361403	0.550237	11	0.165903		0.614944	0.922511	4	0.461256		0.216522	0.108366	7	0.0409587			0.269984
1	f	0	4	19	0.0748784	0.0748784	GE2	1	45	10	9	m9	MedPosterior	6	19		Lfl	0.100216	0.0162629	3	0.00938939		Lateral	0.579638	0.717566	17	0.174035		0.711764	0.963379	8	0.340606		0.462193	0.429813	9	0.143271			5.38568
1	f	0	4	20	0.0714657	0.0714657	GE2	1	45	10	9	m9	MedPosterior	6	19		Lsim	1.23617	1.59327	3	0.919872		IntAnterior	0.747785	0.672677	5	0.30083		0.747785	0.672677	5	0.30083		#DIV/0!	#DIV/0!	0	#DIV/0!			0.706284
1	f	0	4	21	0.0603545	0.0603545	GE2	1	45	10	9	m9	MedPosterior	6	19		Lcrus1	0.44821	0.265604	7	0.100389		IntPosterior	0.233669	0.210405	20	0.0470479		0.209712	0.114898	9	0.0382993		0.253269	0.269468	11	0.0812476			0.605246
1	f	0	4	22	0.117308	0.117308	GE2	1	45	10	9	m9	MedPosterior	6	19		Lcrus2	0.308292	0.168436	4	0.0842179		MedAnterior	0.382601	1.76114	52	0.244226		0.13287	0.103606	24	0.0211485		0.596656	2.39718	28	0.453025			0.745212
1	f	0	4	23	0.120713	0.120713	GE2	1	45	10	8	m8	MedPosterior	6	18		Lpm	0.591564	0.687049	3	0.396668		MedPosterior	0.124856	0.0943444	65	0.011702		0.136812	0.108337	26	0.0212466		0.116885	0.0842988	39	0.0134986			0.423714
1	f	0	4	24	0.0766607	0.0766607	GE2	1	45	10	8	m8	MedPosterior	6	18		isim	0.238259	0.179335	6	0.0732134																			0.852994
1	f	0	4	25	0.0764384	0.0764384	GE2	1	45	10	8	m8	MedPosterior	6	18		icrus1	0.134177	0.0327914	5	0.0146648																			1.63852
1	f	0	4	26	0.177182	0.177182	GE2	1	45	10	8	m8	MedPosterior	6	18		icrus2	0.22191	0.110782	4	0.0553912																			0.682841
1	f	0	4	27	#DIV/0!		GE2	1	45	10	7	m7	MedPosterior				ipm	0.380901	0.488995	3	0.282321																			0.454379
1	f	0	4	28	0.0582848	0.0582848	GE2	1	45	10	6	m6	MedPosterior	6	16		icop	0.271294	0.207215	2	0.146523																			0.436521
1	f	0	4	29	0.0685831	0.0685831	GE2	1	45	10	6	m6	MedPosterior	6	16		i4/5	0.747785	0.672677	5	0.30083																			0.429439
1	f	0	4	30	0.113264	0.113264	GE2	1	45	10	6	m6	MedPosterior	6	16		m2	0.107223	0.027153	17	0.00658556																			1.0636
1	f	0	4	31	0.145381	0.145381	GE2	1	45	10	6	m6	MedPosterior	6	16		m3	0.147671	0.0553934	16	0.0138483																			0.781128
1	f	0	4	32	0.200198	0.200198	GE2	1	45	10	4/5	m4/5	MedAnterior	5	15		m4/5	0.826828	2.90787	19	0.66711																			0.147763
1	f	0	4	33	0.133195	0.133195	GE2	1	45	10	4/5	m4/5	MedAnterior	5	15		m6	0.1374	0.0668149	15	0.0172515																			0.720946
1	f	0	4	34	0.0487424	0.0487424	GE2	1	45	10	4/5	m4/5	MedAnterior	5	15		m7	0.115119	0.023662	6	0.00965996																			0.717928
1	f	0	4	35	0.0944048	0.0944048	GE2	1	45	10	4/5	m4/5	MedAnterior	5	15		m8	0.135483	0.0768634	11	0.0231752																			1.12433
1	f	0	4	36	0.144736	0.144736	GE2	1	45	10	4/5	m4/5	MedAnterior	5	15		m9	0.114413	0.116043	18	0.0273517																			0.93368
1	f	0	4	37	0.145935	0.145935	GE2	1	45	10	4/5	m4/5	MedAnterior	5	15		m10	0.120944	0.122472	15	0.031622																			1.05664
1	f	0	4	38	0.150196	0.150196	GE2	1	45	10	3	m3	MedAnterior	5	14																									#DIV/0!
1	f	0	4	39	0.138037	0.138037	GE2	1	45	10	3	m3	MedAnterior	5	14																									#DIV/0!
1	f	0	4	40	0.0924284	0.0924284	GE2	1	45	10	3	m3	MedAnterior	5	14																									#DIV/0!
1	f	0	4	41	0.0891639	0.0891639	GE2	1	45	10	3	m3	MedAnterior	5	14																									#DIV/0!
1	f	0	4	42	0.0707279	0.0707279	GE2	1	45	10	3	m3	MedAnterior	5	14																									#DIV/0!
1	f	0	4	43	0.0735282	0.0735282	GE2	1	45	10	2	m2	MedAnterior	5	13																									#DIV/0!
1	f	0	4	44	0.267148	0.267148	GE2	1	45	10	2	m2	MedAnterior	5	13																									#DIV/0!
1	f	0	4	45	0.0588039	0.0588039	GE2	1	45	10	2	m2	MedAnterior	5	13																									#DIV/0!
1	m	1	5	190812b_1949	0.575292	0.575292	GE2	1	45	3	cop	Lcop	lateral	2	#N/A																									#DIV/0!
1	m	1	5	2	0.217103	0.217103	GE2	1	45	3	pm	Lpm	Lateral	2	6																									#DIV/0!
1	m	1	5	3	0.439714	0.439714	GE2	1	45	3	crus2	Lcrus2	Lateral	2	5																									#DIV/0!
1	m	1	5	4	0.266952	0.266952	GE2	1	45	3	crus2	Lcrus2	Lateral	2	5																									#DIV/0!
1	m	1	5	5	0.223485	0.223485	GE2	1	45	3	crus1	Lcrus1	Lateral	2	4																									#DIV/0!
1	m	1	5	6	#DIV/0!		GE2	1	45	6	4/5	i4/5	IntAnterior																											#DIV/0!
1	m	1	5	7	0.174885	0.174885	GE2	1	45	6	sim	isim	IntPosterior	4	7																									#DIV/0!
1	m	1	5	8	0.847422	0.847422	GE2	1	45	6	sim	isim	IntPosterior	4	7																									#DIV/0!
1	m	1	5	9	0.166452	0.166452	GE2	1	45	6	sim	isim	IntPosterior	4	7																									#DIV/0!
1	m	1	5	10	0.17552	0.17552	GE2	1	45	6	crus1	icrus1	IntPosterior	4	8																									#DIV/0!
1	m	1	5	11	0.136916	0.136916	GE2	1	45	6	crus2	icrus2	IntPosterior	4	9																									#DIV/0!
1	m	1	5	12	0.262562	0.262562	GE2	1	45	6	crus2	icrus2	IntPosterior	4	9		GE1	400 days	N	7									m	N	3			f	N	4				#VALUE!
1	m	1	5	13	0.301955	0.301955	GE2	1	45	6	crus2	icrus2	IntPosterior	4	9		By Position ID	average	stdev	n	sem		By major regions	average	stdev	n	sem		average	stdev	n	sem		average	stdev	n	sem			#VALUE!
1	m	1	5	14	0.443836	0.443836	GE2	1	45	6	pm	ipm	IntPosterior	4	10		Lpfl	0.23576	0.128233	8	0.0453373		Vestibular	0.224772	0.136883	15	0.035343		0.193585	0.158658	7	0.059967		0.252061	0.118634	8	0.0419433			0.707562
1	m	1	5	15	0.437217	0.437217	GE2	1	45	6	cop	icop	IntPosterior	4	11		Lfl	0.212214	0.155532	7	0.0587856		Lateral	0.36318	0.296748	21	0.0647557		0.311423	0.192381	11	0.0580052		0.420112	0.384303	10	0.121527			1.74699
1	m	1	5	16	0.101109	0.101109	GE2	1	45	11	2	m2	MedAnterior	5	13		Lsim	0.294281	0.123807	6	0.0505439		IntAnterior	0.168046	0.101558	2	0.071812		#DIV/0!	#DIV/0!	0	#DIV/0!		0.168046	0.101558	2	0.071812			#DIV/0!
1	m	1	5	17	0.172149	0.172149	GE2	1	45	11	2	m2	MedAnterior	5	13		Lcrus1	0.520115	0.465394	7	0.175903		IntPosterior	0.41475	0.58551	22	0.124831		0.200623	0.0654154	5	0.0292547		0.477728	0.656004	17	0.159104			1.02421
1	m	1	5	18	0.53542	0.53542	GE2	1	45	11	2	m2	MedAnterior	5	13		Lcrus2	0.2543	0.158005	3	0.0912244		MedAnterior	0.142367	0.10728	54	0.0145989		0.18487	0.150355	21	0.0328101		0.11532	0.0547049	33	0.0095229			1.81766
1	m	1	5	19	0.350895	0.350895	GE2	1	45	11	3	m3	MedAnterior	5	14		Lpm	0.291476	0.135008	5	0.0603772		MedPosterior	0.131748	0.180198	61	0.0230719		0.116357	0.05255	22	0.0112037		0.140431	0.222552	39	0.0356369			0.996549
1	m	1	5	20	0.203895	0.203895	GE2	1	45	11	3	m3	MedAnterior	5	14		isim	0.703278	0.740693	7	0.279956																			0.229547
1	m	1	5	21	0.135729	0.135729	GE2	1	45	11	4/5	m4/5	MedAnterior	5	15		icrus1	0.123734	0.0316837	4	0.0158418																			1.54574
1	m	1	5	22	0.162814	0.162814	GE2	1	45	11	4/5	m4/5	MedAnterior	5	15		icrus2	0.161179	0.0180948	5	0.00809222										aa									0.469813
1	m	1	5	23	0.434168	0.434168	GE2	1	45	11	4/5	m4/5	MedAnterior	5	15		ipm	0.537525	0.797521	5	0.356662																			0.269644
1	m	1	5	24	0.169581	0.169581	GE2	1	45	11	6	m6	MedPosterior	6	16		icop	0.213088	#DIV/0!	1	#DIV/0!																			0.920531
1	m	1	5	25	0.129559	0.129559	GE2	1	45	11	6	m6	MedPosterior	6	16		i4/5	0.168046	0.101558	2	0.071812																			0.881456
1	m	1	5	26	0.329357	0.329357	GE2	1	45	11	7	m7	MedPosterior	6	17		m2	0.148119	0.167563	17	0.04064																			0.597886
1	m	1	5	27	0.109309	0.109309	GE2	1	45	11	8	m8	MedPosterior	6	18		m3	0.129832	0.0462323	18	0.0108971																			1.05868
1	m	1	5	28	0.0929091	0.0929091	GE2	1	45	11	8	m8	MedPosterior	6	18		m4/5	0.149097	0.0816999	19	0.0187433																			0.646372
1	m	1	5	29	0.258709	0.258709	GE2	1	45	11	9	m9	MedPosterior	6	19		m6	0.240955	0.338995	15	0.0875282																			0.607726
1	m	1	5	30	0.0466804	0.0466804	GE2	1	45	11	9	m9	MedPosterior	6	19		m7	0.138667	0.0697256	4	0.0348628																			0.872059
1	m	1	5	31	0.114469	0.114469	GE2	1	45	11	9	m9	MedPosterior	6	19		m8	0.111747	0.0678688	11	0.0204632																			1.63739
1	m	1	5	32	0.0988751	0.0988751	GE2	1	45	11	10	m10	MedPosterior	6	20		m9	0.0870225	0.0288563	17	0.00699868																			3.82076
1	m	1	5	33	0.0381729	0.0381729	GE2	1	45	11	10	m10	MedPosterior	6	20		m10	0.0827888	0.0332817	14	0.00889492																			2.0229
1	m	1	6	190819b_1709	1.78768	1.78768	GE3	2	120	2	crus2	Lcrus2	Lateral	2	5																									#DIV/0!
1	m	1	6	2	0.994804	0.994804	GE3	2	120	2	crus1	Lcrus1	Lateral	2	4																									#DIV/0!
1	m	1	6	3	0.98231	0.98231	GE3	2	120	2	sim	Lsim	Lateral	2	3																									#DIV/0!
1	m	1	6	4	0.318588	0.318588	GE3	2	120	5	cop	icop	IntPosterior	4	11																									#DIV/0!
1	m	1	6	5	#DIV/0!		GE3	2	120	5	pm	ipm	IntPosterior																											#DIV/0!
1	m	1	6	6	0.144359	0.144359	GE3	2	120	5	crus2	icrus2	IntPosterior	4	9																									#DIV/0!
1	m	1	6	7	0.478664	0.478664	GE3	2	120	5	crus2	icrus2	IntPosterior	4	9																									#DIV/0!
1	m	1	6	8	0.191271	0.191271	GE3	2	120	5	4/5	i4/5	IntAnterior	3	12																									#DIV/0!
1	m	1	6	9	0.296584	0.296584	GE3	2	120	12	10	m10	MedPosterior	6	20																									#DIV/0!
1	m	1	6	10	0.217986	0.217986	GE3	2	120	12	10	m10	MedPosterior	6	20																									#DIV/0!
1	m	1	6	11	0.190555	0.190555	GE3	2	120	12	9	m9	MedPosterior	6	19																									#DIV/0!
1	m	1	6	12	0.0738726	0.0738726	GE3	2	120	12	9	m9	MedPosterior	6	19																									#DIV/0!
1	m	1	6	13	0.32977	0.32977	GE3	2	120	12	9	m9	MedPosterior	6	19																									#DIV/0!
1	m	1	6	14	0.149694	0.149694	GE3	2	120	12	8	m8	MedPosterior	6	18																									#DIV/0!
1	m	1	6	15	0.155187	0.155187	GE3	2	120	12	8	m8	MedPosterior	6	18																									#DIV/0!
1	m	1	6	16	0.129563	0.129563	GE3	2	120	12	8	m8	MedPosterior	6	18																									#DIV/0!
1	m	1	6	17	0.118688	0.118688	GE3	2	120	12	7	m7	MedPosterior	6	17																									#DIV/0!
1	m	1	6	18	#DIV/0!		GE3	2	120	12	6	m6	MedPosterior																											#DIV/0!
1	m	1	6	19	0.294006	0.294006	GE3	2	120	12	6	m6	MedPosterior	6	16																									#DIV/0!
1	m	1	6	20	0.231017	0.231017	GE3	2	120	12	4/5	m4/5	MedAnterior	5	15																									#DIV/0!
1	m	1	6	21	0.0864915	0.0864915	GE3	2	120	12	4/5	m4/5	MedAnterior	5	15																									#DIV/0!
1	m	1	6	22	0.16143	0.16143	GE3	2	120	12	4/5	m4/5	MedAnterior	5	15																									#DIV/0!
1	m	1	6	23	0.180165	0.180165	GE3	2	120	12	3	m3	MedAnterior	5	14																									#DIV/0!
1	m	1	6	24	#DIV/0!		GE3	2	120	12	3	m3	MedAnterior																											#DIV/0!
1	m	1	6	25	0.109287	0.109287	GE3	2	120	12	3	m3	MedAnterior	5	14																									#DIV/0!
1	m	1	6	26	#DIV/0!		GE3	2	120	12	2	m2	MedAnterior																											#DIV/0!
1	m	1	6	27	0.220716	0.220716	GE3	2	120	12	2	m2	MedAnterior	5	13																									#DIV/0!
1	m	1	7	190920a_1820	0.413765	0.413765	GE3	2	120	3	pm	Lpm	Lateral	2	6																									#DIV/0!
1	m	1	7	2	0.13632	0.13632	GE3	2	120	3	crus2	Lcrus2	Lateral	2	5																									#DIV/0!
1	m	1	7	3	0.378291	0.378291	GE3	2	120	3	crus1	Lcrus1	Lateral	2	4																									#DIV/0!
1	m	1	7	4	0.304544	0.304544	GE3	2	120	3	crus1	Lcrus1	Lateral	2	4																									#DIV/0!
1	m	1	7	5	0.793561	0.793561	GE3	2	120	3	pfl	Lpfl	Vestibular	1	1																									#DIV/0!
1	m	1	7	6	#DIV/0!		GE3	2	120	3	pfl	Lpfl	Vestibular																											#DIV/0!
1	m	1	7	7	#DIV/0!		GE3	2	120	3																														#DIV/0!
1	m	1	7	8	#DIV/0!		GE3	2	120	7	4/5	i4/5	IntAnterior	3	12																									#DIV/0!
1	m	1	7	9	0.19954	0.19954	GE3	2	120	7	4/5	i4/5	IntAnterior	3	12																									#DIV/0!
1	m	1	7	10	#DIV/0!		GE3	2	120	7	4/5	i4/5	IntAnterior																											#DIV/0!
1	m	1	7	11	0.216181	0.216181	GE3	2	120	7	sim	isim	IntPosterior	4	7																									#DIV/0!
1	m	1	7	12	0.103939	0.103939	GE3	2	120	7	crus1	icrus1	IntPosterior	4	8																									#DIV/0!
1	m	1	7	13	0.500466	0.500466	GE3	2	120	7	crus1	icrus1	IntPosterior	4	8																									#DIV/0!
1	m	1	7	14	0.0839192	0.0839192	GE3	2	120	7	cop	icop	IntPosterior	4	11																									#DIV/0!
1	m	1	7	15	0.10302	0.10302	GE3	2	120	11	2	m2	MedAnterior	5	13																									#DIV/0!
1	m	1	7	16	0.0998823	0.0998823	GE3	2	120	11	2	m2	MedAnterior	5	13																									#DIV/0!
1	m	1	7	17	0.29809	0.29809	GE3	2	120	11	3	m3	MedAnterior	5	14																									#DIV/0!
1	m	1	7	18	0.126937	0.126937	GE3	2	120	11	3	m3	MedAnterior	5	14																									#DIV/0!
1	m	1	7	19	0.25171	0.25171	GE3	2	120	11	3	m3	MedAnterior	5	14																									#DIV/0!
1	m	1	7	20	0.201976	0.201976	GE3	2	120	11	4/5	m4/5	MedAnterior	5	15																									#DIV/0!
1	m	1	7	21	0.0966109	0.0966109	GE3	2	120	11	4/5	m4/5	MedAnterior	5	15																									#DIV/0!
1	m	1	7	22	0.147883	0.147883	GE3	2	120	11	6	m6	MedPosterior	6	16																									#DIV/0!
1	m	1	7	23	0.333697	0.333697	GE3	2	120	11	7	m7	MedPosterior	6	17																									#DIV/0!
1	m	1	7	24	0.0715589	0.0715589	GE3	2	120	11	8	m8	MedPosterior	6	18																									#DIV/0!
1	m	1	7	25	0.0578554	0.0578554	GE3	2	120	11	8	m8	MedPosterior	6	18																									#DIV/0!
1	m	1	7	26	0.0874133	0.0874133	GE3	2	120	11	9	m9	MedPosterior	6	19																									#DIV/0!
1	m	1	7	27	0.0692246	0.0692246	GE3	2	120	11	9	m9	MedPosterior	6	19																									#DIV/0!
1	m	1	7	28	0.0872905	0.0872905	GE3	2	120	11	9	m9	MedPosterior	6	19																									#DIV/0!
1	m	1	7	29	0.0947284	0.0947284	GE3	2	120	11	10	m10	MedPosterior	6	20																									#DIV/0!
1	m	1	7	30	0.0663701	0.0663701	GE3	2	120	11	10	m10	MedPosterior	6	20																									#DIV/0!
1	m	1	8	190923a_1809	#DIV/0!		GE3	2	120	3	crus1	Lcrus1	Lateral																											#DIV/0!
1	m	1	8	2	#DIV/0!		GE3	2	120	3	crus1	Lcrus1	Lateral																											#DIV/0!
1	m	1	8	3	0.234689	0.234689	GE3	2	120	3	crus2	Lcrus2	Lateral	2	5																									#DIV/0!
1	m	1	8	4	0.17046	0.17046	GE3	2	120	3	fl	Lfl	Vestibular	1	2																									#DIV/0!
1	m	1	8	5	0.412808	0.412808	GE3	2	120	7	crus2	icrus2	IntPosterior	4	9																									#DIV/0!
1	m	1	8	6	0.235497	0.235497	GE3	2	120	7	crus1	icrus1	IntPosterior	4	8																									#DIV/0!
1	m	1	8	7	0.114833	0.114833	GE3	2	120	7	crus2	icrus2	IntPosterior	4	9																									#DIV/0!
1	m	1	8	8	0.0790865	0.0790865	GE3	2	120	11	2	m2	MedAnterior	5	13																									#DIV/0!
1	m	1	8	9	0.0847363	0.0847363	GE3	2	120	11	2	m2	MedAnterior	5	13																									#DIV/0!
1	m	1	8	10	0.141906	0.141906	GE3	2	120	11	3	m3	MedAnterior	5	14																									#DIV/0!
1	m	1	8	11	0.254292	0.254292	GE3	2	120	11	3	m3	MedAnterior	5	14																									#DIV/0!
1	m	1	8	12	0.184552	0.184552	GE3	2	120	11	3	m3	MedAnterior	5	14																									#DIV/0!
1	m	1	8	13	#DIV/0!		GE3	2	120	11	3	m3	MedAnterior																											#DIV/0!
1	m	1	8	14	0.158541	0.158541	GE3	2	120	11	4/5	m4/5	MedAnterior	5	15																									#DIV/0!
1	m	1	8	15	0.145079	0.145079	GE3	2	120	11	4/5	m4/5	MedAnterior	5	15																									#DIV/0!
1	m	1	8	16	0.330671	0.330671	GE3	2	120	11	4/5	m4/5	MedAnterior	5	15																									#DIV/0!
1	m	1	8	17	0.441374	0.441374	GE3	2	120	11	4/5	m4/5	MedAnterior	5	15																									#DIV/0!
1	m	1	8	18	0.166381	0.166381	GE3	2	120	11	6	m6	MedPosterior	6	16																									#DIV/0!
1	m	1	8	19	0.0730124	0.0730124	GE3	2	120	11	6	m6	MedPosterior	6	16																									#DIV/0!
1	m	1	8	20	0.19045	0.19045	GE3	2	120	11	7	m7	MedPosterior	6	17																									#DIV/0!
1	m	1	8	21	0.101391	0.101391	GE3	2	120	11	8	m8	MedPosterior	6	18																									#DIV/0!
1	m	1	8	22	0.371006	0.371006	GE3	2	120	11	8	m8	MedPosterior	6	18																									#DIV/0!
1	m	1	8	23	0.347022	0.347022	GE3	2	120	11	9	m9	MedPosterior	6	19																									#DIV/0!
1	m	1	8	24	0.0954772	0.0954772	GE3	2	120	11	9	m9	MedPosterior	6	19																									#DIV/0!
1	m	1	8	25	0.0889963	0.0889963	GE3	2	120	11	10	m10	MedPosterior	6	20																									#DIV/0!
1	m	1	8	26	0.0863832	0.0863832	GE3	2	120	11	10	m10	MedPosterior	6	20																									#DIV/0!
1	m	1	9	190923b_1818	0.179781	0.179781	GE3	2	120	3	sim	Lsim	Lateral	2	3																									#DIV/0!
1	m	1	9	2	#DIV/0!		GE3	2	120	3	sim	Lsim	Lateral																											#DIV/0!
1	m	1	9	3	0.382702	0.382702	GE3	2	120	3	crus1	Lcrus1	Lateral	2	4																									#DIV/0!
1	m	1	9	4	0.473116	0.473116	GE3	2	120	3	crus2	Lcrus2	Lateral	2	5																									#DIV/0!
1	m	1	9	5	0.904534	0.904534	GE3	2	120	3	pm	Lpm	Lateral	2	6																									#DIV/0!
1	m	1	9	6	0.223485	0.223485	GE3	2	120	3	pm	Lpm	Lateral	2	6																									#DIV/0!
1	m	1	9	7	0.142274	0.142274	GE3	2	120	3	pfl	Lpfl	Vestibular	1	1																									#DIV/0!
1	m	1	9	8	0.167893	0.167893	GE3	2	120	3	fl	Lfl	Vestibular	1	2																									#DIV/0!
1	m	1	9	9	0.139764	0.139764	GE3	2	120	3	fl	Lfl	Vestibular	1	2																									#DIV/0!
1	m	1	9	10	#DIV/0!		GE3	2	120	6	pm	ipm	IntPosterior																											#DIV/0!
1	m	1	9	11	0.0817799	0.0817799	GE3	2	120	6	crus1	icrus1	IntPosterior	4	8																									#DIV/0!
1	m	1	9	12	#DIV/0!		GE3	2	120	6	4/5	i4/5	IntAnterior																											#DIV/0!
1	m	1	9	13	0.195108	0.195108	GE3	2	120	6	4/5	i4/5	IntAnterior	3	12																									#DIV/0!
1	m	1	9	14	0.0955174	0.0955174	GE3	2	120	11	10	m10	MedPosterior	6	20
1	m	1	9	15	0.113822	0.113822	GE3	2	120	11	10	m10	MedPosterior	6	20
1	m	1	9	16	0.165917	0.165917	GE3	2	120	11	9	m9	MedPosterior	6	19
1	m	1	9	17	0.0816133	0.0816133	GE3	2	120	11	9	m9	MedPosterior	6	19
1	m	1	9	18	0.058318	0.058318	GE3	2	120	11	9	m9	MedPosterior	6	19
1	m	1	9	19	0.460684	0.460684	GE3	2	120	11	9	m9	MedPosterior	6	19
1	m	1	9	20	0.170747	0.170747	GE3	2	120	11	8	m8	MedPosterior	6	18
1	m	1	9	21	0.12445	0.12445	GE3	2	120	11	8	m8	MedPosterior	6	18
1	m	1	9	22	0.0847136	0.0847136	GE3	2	120	11	6	m6	MedPosterior	6	16
1	m	1	9	23	0.103824	0.103824	GE3	2	120	11	6	m6	MedPosterior	6	16
1	m	1	9	24	0.219621	0.219621	GE3	2	120	11	6	m6	MedPosterior	6	16
1	m	1	9	25	#DIV/0!		GE3	2	120	11	4/5	m4/5	MedAnterior
1	m	1	9	26	0.242098	0.242098	GE3	2	120	11	4/5	m4/5	MedAnterior	5	15
1	m	1	9	27	0.111489	0.111489	GE3	2	120	11	4/5	m4/5	MedAnterior	5	15
1	m	1	9	28	0.188492	0.188492	GE3	2	120	11	3	m3	MedAnterior	5	14
1	m	1	9	29	0.192121	0.192121	GE3	2	120	11	3	m3	MedAnterior	5	14
1	m	1	9	30	0.523303	0.523303	GE3	2	120	11	3	m3	MedAnterior	5	14
1	m	1	9	31	0.145066	0.145066	GE3	2	120	11	2	m2	MedAnterior	5	13
1	m	1	9	32	0.124809	0.124809	GE3	2	120	11	2	m2	MedAnterior	5	13
1	f	0	10	191112_2117	0.722456	0.722456	GE3	2	120	3	sim	Lsim	Lateral	2	3
1	f	0	10	2	3.27643	3.27643	GE3	2	120	3	sim	Lsim	Lateral	2	3
1	f	0	10	3	0.265574	0.265574	GE3	2	120	3	crus1	Lcrus1	Lateral	2	4
1	f	0	10	4	#DIV/0!		GE3	2	120	6	crus2	icrus2	IntPosterior
1	f	0	10	5	0.0640321	0.0640321	GE3	2	120	11	2	m2	MedAnterior	5	13
1	f	0	10	6	#DIV/0!		GE3	2	120	11	2	m2	MedAnterior
1	f	0	10	7	0.277489	0.277489	GE3	2	120	11	2	m2	MedAnterior	5	13
1	f	0	10	8	#DIV/0!		GE3	2	120	11	3	m3	MedAnterior
1	f	0	10	9	0.288119	0.288119	GE3	2	120	11	3	m3	MedAnterior	5	14
1	f	0	10	10	0.22793	0.22793	GE3	2	120	11	3	m3	MedAnterior	5	14
1	f	0	10	11	0.0750408	0.0750408	GE3	2	120	11	4/5	m4/5	MedAnterior	5	15
1	f	0	10	12	0.17249	0.17249	GE3	2	120	11	4/5	m4/5	MedAnterior	5	15
1	f	0	10	13	0.136698	0.136698	GE3	2	120	11	6	m6	MedPosterior	6	16
1	f	0	10	14	0.106042	0.106042	GE3	2	120	11	6	m6	MedPosterior	6	16
1	f	0	10	15	#DIV/0!		GE3	2	120	11	7	m7	MedPosterior
1	f	0	10	16	0.189527	0.189527	GE3	2	120	11	8	m8	MedPosterior	6	18
1	f	0	10	17	0.145176	0.145176	GE3	2	120	11	8	m8	MedPosterior	6	18
1	f	0	10	18	0.255	0.255	GE3	2	120	11	8	m8	MedPosterior	6	18
1	f	0	10	19	0.0999459	0.0999459	GE3	2	120	11	9	m9	MedPosterior	6	19
1	f	0	10	20	0.0946409	0.0946409	GE3	2	120	11	9	m9	MedPosterior	6	19
1	f	0	10	21	0.106744	0.106744	GE3	2	120	11	9	m9	MedPosterior	6	19
1	f	0	10	22	0.067214	0.067214	GE3	2	120	11	10	m10	MedPosterior	6	20
1	f	0	10	23	0.177775	0.177775	GE3	2	120	11	10	m10	MedPosterior	6	20
1	f	0	11	191114_2091	0.674219	0.674219	GE3	2	120	3	crus1	Lcrus1	Lateral	2	4
1	f	0	11	2	#DIV/0!		GE3	2	120	3	crus2	Lcrus2	Lateral
1	f	0	11	3	0.176604	0.176604	GE3	2	120	3	pm	Lpm	Lateral	2	6
1	f	0	11	4	#DIV/0!		GE3	2	120
1	f	0	11	5	2.98123	2.98123	GE3	2	120	6	sim	isim	IntPosterior	4	7
1	f	0	11	6	1.89392	1.89392	GE3	2	120	6	4/5	i4/5	IntAnterior	3	12
1	f	0	11	7	#DIV/0!		GE3	2	120	6	crus1	icrus1	IntPosterior
1	f	0	11	8	0.0917538	0.0917538	GE3	2	120	12	2	m2	MedAnterior	5	13
1	f	0	11	9	0.0899873	0.0899873	GE3	2	120	12	2	m2	MedAnterior	5	13
1	f	0	11	10	0.125221	0.125221	GE3	2	120	12	2	m2	MedAnterior	5	13
1	f	0	11	11	#DIV/0!		GE3	2	120	12	3	m3	MedAnterior
1	f	0	11	12	0.0999424	0.0999424	GE3	2	120	12	3	m3	MedAnterior	5	14
1	f	0	11	13	0.17186	0.17186	GE3	2	120	12	3	m3	MedAnterior	5	14
1	f	0	11	14	0.162397	0.162397	GE3	2	120	12	4/5	m4/5	MedAnterior	5	15
1	f	0	11	15	#DIV/0!		GE3	2	120	12	4/5	m4/5	MedAnterior
1	f	0	11	16	0.148904	0.148904	GE3	2	120	12	4/5	m4/5	MedAnterior	5	15
1	f	0	11	17	0.130312	0.130312	GE3	2	120	12	6	m6	MedPosterior	6	16
1	f	0	11	18	0.121948	0.121948	GE3	2	120	12	6	m6	MedPosterior	6	16
1	f	0	11	19	0.0923987	0.0923987	GE3	2	120	12	6	m6	MedPosterior	6	16
1	f	0	11	20	0.0816478	0.0816478	GE3	2	120	12	6	m6	MedPosterior	6	16
1	f	0	11	21	0.231572	0.231572	GE3	2	120	12	7	m7	MedPosterior	6	17
1	f	0	11	22	0.384139	0.384139	GE3	2	120	12	7	m7	MedPosterior	6	17
1	f	0	11	23	0.13008	0.13008	GE3	2	120	12	8	m8	MedPosterior	6	18
1	f	0	11	24	0.0644354	0.0644354	GE3	2	120	12	8	m8	MedPosterior	6	18
1	f	0	11	25	0.105804	0.105804	GE3	2	120	12	9	m9	MedPosterior	6	19
1	f	0	11	26	0.300818	0.300818	GE3	2	120	12	9	m9	MedPosterior	6	19
1	f	0	11	27	0.0532107	0.0532107	GE3	2	120	12	10	m10	MedPosterior	6	20
1	f	0	11	28	0.0591131	0.0591131	GE3	2	120	12	10	m10	MedPosterior	6	20
1	f	0	12	191115a_2299	0.143588	0.143588	GE2	1	45	3	crus1	Lcrus1	Lateral	2	4
1	f	0	12	2	#DIV/0!		GE2	1	45	3	crus2	Lcrus2	Lateral
1	f	0	12	3	0.916091	0.916091	GE2	1	45	3	crus2	Lcrus2	Lateral	2	5
1	f	0	12	4	#DIV/0!		GE2	1	45	3	pm	Lpm	Lateral
1	f	0	12	5	0.290237	0.290237	GE2	1	45	6	4/5	i4/5	IntAnterior	3	12
1	f	0	12	6	#DIV/0!		GE2	1	45	6	crus2	icrus2	IntPosterior
1	f	0	12	7	#DIV/0!		GE2	1	45	6	pm	ipm	IntPosterior
1	f	0	12	8	0.288578	0.288578	GE2	1	45	12	10	m10	MedPosterior	6	20
1	f	0	12	9	0.0957268	0.0957268	GE2	1	45	12	10	m10	MedPosterior	6	20
1	f	0	12	10	0.147284	0.147284	GE2	1	45	12	9	m9	MedPosterior	6	19
1	f	0	12	11	0.140084	0.140084	GE2	1	45	12	9	m9	MedPosterior	6	19
1	f	0	12	12	0.108142	0.108142	GE2	1	45	12	9	m9	MedPosterior	6	19
1	f	0	12	13	0.158208	0.158208	GE2	1	45	12	8	m8	MedPosterior	6	18
1	f	0	12	14	0.211586	0.211586	GE2	1	45	12	8	m8	MedPosterior	6	18
1	f	0	12	15	#DIV/0!		GE2	1	45	12	7	m7	MedPosterior
1	f	0	12	16	0.180491	0.180491	GE2	1	45	12	6	m6	MedPosterior	6	16
1	f	0	12	17	0.20846	0.20846	GE2	1	45	12	4/5	m4/5	MedAnterior	5	15
1	f	0	12	18	0.207855	0.207855	GE2	1	45	12	4/5	m4/5	MedAnterior	5	15
1	f	0	12	19	0.202807	0.202807	GE2	1	45	12	4/5	m4/5	MedAnterior	5	15
1	f	0	12	20	0.242164	0.242164	GE2	1	45	12	3	m3	MedAnterior	5	14
1	f	0	12	21	0.201613	0.201613	GE2	1	45	12	3	m3	MedAnterior	5	14
1	f	0	12	22	0.197832	0.197832	GE2	1	45	12	3	m3	MedAnterior	5	14
1	f	0	12	23	0.305733	0.305733	GE2	1	45	12	2	m2	MedAnterior	5	13
1	f	0	12	24	0.172824	0.172824	GE2	1	45	12	2	m2	MedAnterior	5	13
1	f	0	13	191115b_2300	0.300015	0.300015	GE2	1	45	3	sim	Lsim	Lateral	2	3
1	f	0	13	2	0.229593	0.229593	GE2	1	45	3	crus1	Lcrus1	Lateral	2	4
1	f	0	13	3	#DIV/0!		GE2	1	45	3	crus1	Lcrus1	Lateral
1	f	0	13	4	0.457503	0.457503	GE2	1	45	3	crus2	Lcrus2	Lateral	2	5
1	f	0	13	5	#DIV/0!		GE2	1	45	3	crus2	Lcrus2	Lateral
1	f	0	13	6	0.468625	0.468625	GE2	1	45	6	crus2	icrus2	IntPosterior	4	9
1	f	0	13	7	0.151372	0.151372	GE2	1	45	6	sim	isim	IntPosterior	4	7
1	f	0	13	8	0.331428	0.331428	GE2	1	45	6	crus1	icrus1	IntPosterior	4	8
1	f	0	13	9	#DIV/0!		GE2	1	45	6	crus2	icrus2	IntPosterior
1	f	0	13	10	0.572952	0.572952	GE2	1	45	6	cop	icop	IntPosterior	4	11
1	f	0	13	11	0.205154	0.205154	GE2	1	45	6	cop	icop	IntPosterior	4	11
1	f	0	13	12	0.114474	0.114474	GE2	1	45	12	2	m2	MedAnterior	5	13
1	f	0	13	13	0.102317	0.102317	GE2	1	45	12	2	m2	MedAnterior	5	13
1	f	0	13	14	0.264886	0.264886	GE2	1	45	12	3	m3	MedAnterior	5	14
1	f	0	13	15	0.185262	0.185262	GE2	1	45	12	4/5	m4/5	MedAnterior	5	15
1	f	0	13	16	#DIV/0!		GE2	1	45	12	4/5	m4/5	MedAnterior
1	f	0	13	17	0.446369	0.446369	GE2	1	45	12	4/5	m4/5	MedAnterior	5	15
1	f	0	13	18	0.252051	0.252051	GE2	1	45	12	4/5	m4/5	MedAnterior	5	15
1	f	0	13	19	0.300228	0.300228	GE2	1	45	12	6	m6	MedPosterior	6	16
1	f	0	13	20	0.244502	0.244502	GE2	1	45	12	7	m7	MedPosterior	6	17
1	f	0	13	21	0.144046	0.144046	GE2	1	45	12	8	m8	MedPosterior	6	18
1	f	0	13	22	0.148128	0.148128	GE2	1	45	12	8	m8	MedPosterior	6	18
1	f	0	13	23	0.209918	0.209918	GE2	1	45	12	9	m9	MedPosterior	6	19
1	f	0	13	24	0.107856	0.107856	GE2	1	45	12	9	m9	MedPosterior	6	19
1	f	0	13	25	0.0548008	0.0548008	GE2	1	45	12	10	m10	MedPosterior	6	20
1	f	0	13	26	0.0787012	0.0787012	GE2	1	45	12	10	m10	MedPosterior	6	20
1	f	0	14	191121a_1693	#DIV/0!		GE4	3	210	3
1	f	0	14	2	0.32434	0.32434	GE4	3	210	3	pfl	Lpfl	Vestibular	1	1
1	f	0	14	3	0.125503	0.125503	GE4	3	210	3	pfl	Lpfl	Vestibular	1	1
1	f	0	14	4	#DIV/0!		GE4	3	210	3	crus2	Lcrus2	Lateral
1	f	0	14	5	0.391561	0.391561	GE4	3	210	3	crus1	Lcrus1	Lateral	2	4
1	f	0	14	6	1.38485	1.38485	GE4	3	210	3	pm	Lpm	Lateral	2	6
1	f	0	14	7	#DIV/0!		GE4	3	210	6	4/5	i4/5	IntAnterior
1	f	0	14	8	0.574702	0.574702	GE4	3	210	6	sim	isim	IntPosterior	4	7
1	f	0	14	9	0.166811	0.166811	GE4	3	210	6	crus1	icrus1	IntPosterior	4	8
1	f	0	14	10	0.133123	0.133123	GE4	3	210	6	crus2	icrus2	IntPosterior	4	9
1	f	0	14	11	0.104993	0.104993	GE4	3	210	12	2	m2	MedAnterior	5	13
1	f	0	14	12	0.0814503	0.0814503	GE4	3	210	12	2	m2	MedAnterior	5	13
1	f	0	14	13	0.11079	0.11079	GE4	3	210	12	3	m3	MedAnterior	5	14
1	f	0	14	14	0.103221	0.103221	GE4	3	210	12	3	m3	MedAnterior	5	14
1	f	0	14	15	#DIV/0!		GE4	3	210	12	4/5	m4/5	MedAnterior
1	f	0	14	16	12.8262	12.8262	GE4	3	210	12	4/5	m4/5	MedAnterior	5	15
1	f	0	14	17	0.160208	0.160208	GE4	3	210	12	4/5	m4/5	MedAnterior	5	15
1	f	0	14	18	0.146969	0.146969	GE4	3	210	12	6	m6	MedPosterior	6	16
1	f	0	14	19	0.0981024	0.0981024	GE4	3	210	12	6	m6	MedPosterior	6	16
1	f	0	14	20	0.0559009	0.0559009	GE4	3	210	12	6	m6	MedPosterior	6	16
1	f	0	14	21	0.125643	0.125643	GE4	3	210	12	8	m8	MedPosterior	6	18
1	f	0	14	22	0.0835481	0.0835481	GE4	3	210	12	8	m8	MedPosterior	6	18
1	f	0	14	23	0.14927	0.14927	GE4	3	210	12	9	m9	MedPosterior	6	19
1	f	0	14	24	0.553921	0.553921	GE4	3	210	12	9	m9	MedPosterior	6	19
1	f	0	14	25	0.0619616	0.0619616	GE4	3	210	12	10	m10	MedPosterior	6	20
1	f	0	14	26	0.0694614	0.0694614	GE4	3	210	12	10	m10	MedPosterior	6	20
1	f	0	15	191122b_1694	0.185618	0.185618	GE4	3	210	3	pfl	Lpfl	Vestibular	1	1
1	f	0	15	2	0.152074	0.152074	GE4	3	210	3	pfl	Lpfl	Vestibular	1	1
1	f	0	15	3	0.202553	0.202553	GE4	3	210	3	pm	Lpm	Lateral	2	6
1	f	0	15	4	#DIV/0!		GE4	3	210	3	sim	Lsim	Lateral
1	f	0	15	5	0.345659	0.345659	GE4	3	210	3	crus1	Lcrus1	Lateral	2	4
1	f	0	15	6	#DIV/0!		GE4	3	210	6	pm	ipm	IntPosterior
1	f	0	15	7	0.150138	0.150138	GE4	3	210	6	crus2	icrus2	IntPosterior	4	9
1	f	0	15	8	0.0872395	0.0872395	GE4	3	210	6	crus1	icrus1	IntPosterior	4	8
1	f	0	15	9	0.280472	0.280472	GE4	3	210	6	sim	isim	IntPosterior	4	7
1	f	0	15	10	0.145503	0.145503	GE4	3	210	12	2	m2	MedAnterior	5	13
1	f	0	15	11	0.127429	0.127429	GE4	3	210	12	2	m2	MedAnterior	5	13
1	f	0	15	12	0.259718	0.259718	GE4	3	210	12	3	m3	MedAnterior	5	14
1	f	0	15	13	0.170962	0.170962	GE4	3	210	12	3	m3	MedAnterior	5	14
1	f	0	15	14	0.218933	0.218933	GE4	3	210	12	3	m3	MedAnterior	5	14
1	f	0	15	15	0.166485	0.166485	GE4	3	210	12	4/5	m4/5	MedAnterior	5	15
1	f	0	15	16	0.228105	0.228105	GE4	3	210	12	4/5	m4/5	MedAnterior	5	15
1	f	0	15	17	0.14032	0.14032	GE4	3	210	12	4/5	m4/5	MedAnterior	5	15
1	f	0	15	18	0.212871	0.212871	GE4	3	210	12	6	m6	MedPosterior	6	16
1	f	0	15	19	0.0850771	0.0850771	GE4	3	210	12	6	m6	MedPosterior	6	16
1	f	0	15	20	0.155303	0.155303	GE4	3	210	12	7	m7	MedPosterior	6	17
1	f	0	15	21	0.0991262	0.0991262	GE4	3	210	12	8	m8	MedPosterior	6	18
1	f	0	15	22	0.110173	0.110173	GE4	3	210	12	9	m9	MedPosterior	6	19
1	f	0	15	23	0.0525811	0.0525811	GE4	3	210	12	9	m9	MedPosterior	6	19
1	f	0	15	24	0.0562408	0.0562408	GE4	3	210	12	9	m9	MedPosterior	6	19
1	f	0	15	25	0.174467	0.174467	GE4	3	210	12	9	m9	MedPosterior	6	19
1	f	0	15	26	0.0838577	0.0838577	GE4	3	210	12	10	m10	MedPosterior	6	20
1	f	0	15	27	0.145677	0.145677	GE4	3	210	12	10	m10	MedPosterior	6	20
1	f	0	18	191204a_2152	0.170811	0.170811	GE3	2	120	3	Fl	LFl	Vestibular	1	2				#NAME?
1	f	0	18	2	#DIV/0!		GE3	2	120	7	4/5	i4/5	IntAnterior
1	f	0	18	3	0.298857	0.298857	GE3	2	120	7	pm	ipm	IntPosterior	4	10
1	f	0	18	4	#DIV/0!		GE3	2	120	7	pm	ipm	IntPosterior
1	f	0	18	5	0.167008	0.167008	GE3	2	120	7	cop	icop	IntPosterior	4	11
1	f	0	18	6	#DIV/0!		GE3	2	120	12	2	m2	MedAnterior
1	f	0	18	7	0.137474	0.137474	GE3	2	120	12	2	m2	MedAnterior	5	13
1	f	0	18	8	0.19086	0.19086	GE3	2	120	12	2	m2	MedAnterior	5	13
1	f	0	18	9	0.256677	0.256677	GE3	2	120	12	3	m3	MedAnterior	5	14
1	f	0	18	10	0.24924	0.24924	GE3	2	120	12	3	m3	MedAnterior	5	14
1	f	0	18	11	0.378479	0.378479	GE3	2	120	12	3	m3	MedAnterior	5	14
1	f	0	18	12	0.778822	0.778822	GE3	2	120	12	4/5	m4/5	MedAnterior	5	15
1	f	0	18	13	#DIV/0!		GE3	2	120	12	4/5	m4/5	MedAnterior
1	f	0	18	14	0.175783	0.175783	GE3	2	120	12	4/5	m4/5	MedAnterior	5	15
1	f	0	18	15	0.111256	0.111256	GE3	2	120	12	6	m6	MedPosterior	6	16
1	f	0	18	16	0.0644062	0.0644062	GE3	2	120	12	6	m6	MedPosterior	6	16
1	f	0	18	17	0.258609	0.258609	GE3	2	120	12	8	m8	MedPosterior	6	18
1	f	0	18	18	0.149996	0.149996	GE3	2	120	12	8	m8	MedPosterior	6	18
1	f	0	18	19	0.132613	0.132613	GE3	2	120	12	9	m9	MedPosterior	6	19
1	f	0	18	20	0.0959746	0.0959746	GE3	2	120	12	9	m9	MedPosterior	6	19
1	f	0	18	21	0.0959323	0.0959323	GE3	2	120	12	10	m10	MedPosterior	6	20
1	f	0	18	22	0.0606151	0.0606151	GE3	2	120	12	10	m10	MedPosterior	6	20
1	m	1	16	191202a_1743	0.104232	0.104232	GE4	3	210	2	fl	Lfl	Vestibular	1	2
1	m	1	16	2	0.253952	0.253952	GE4	3	210	2	crus2	Lcrus2	Lateral	2	5
1	m	1	16	3	0.544623	0.544623	GE4	3	210	2	crus2	Lcrus2	Lateral	2	5
1	m	1	16	4	0.220233	0.220233	GE4	3	210	6	sim	isim	IntPosterior	4	7
1	m	1	16	5	#DIV/0!		GE4	3	210	6	crus1	icrus1	IntPosterior
1	m	1	16	6	0.375994	0.375994	GE4	3	210	6	crus2	icrus2	IntPosterior	4	9
1	m	1	16	7	#DIV/0!		GE4	3	210	6	crus2	icrus2	IntPosterior
1	m	1	16	8	0.417817	0.417817	GE4	3	210	6	cop	icop	IntPosterior	4	11
1	m	1	16	9	0.0613947	0.0613947	GE4	3	210	11	2	m2	MedAnterior	5	13
1	m	1	16	10	0.0755813	0.0755813	GE4	3	210	11	2	m2	MedAnterior	5	13
1	m	1	16	11	0.161985	0.161985	GE4	3	210	11	2	m2	MedAnterior	5	13
1	m	1	16	12	0.173848	0.173848	GE4	3	210	11	3	m3	MedAnterior	5	14
1	m	1	16	13	0.199794	0.199794	GE4	3	210	11	3	m3	MedAnterior	5	14
1	m	1	16	14	0.213153	0.213153	GE4	3	210	11	3	m3	MedAnterior	5	14
1	m	1	16	15	0.105849	0.105849	GE4	3	210	11	4/5	m4/5	MedAnterior	5	15
1	m	1	16	16	#DIV/0!		GE4	3	210	11	4/5	m4/5	MedAnterior
1	m	1	16	17	0.160405	0.160405	GE4	3	210	11	4/5	m4/5	MedAnterior	5	15
1	m	1	16	18	0.221092	0.221092	GE4	3	210	11	6	m6	MedPosterior	6	16
1	m	1	16	19	0.0968775	0.0968775	GE4	3	210	11	6	m6	MedPosterior	6	16
1	m	1	16	20	0.285697	0.285697	GE4	3	210	11	6	m6	MedPosterior	6	16
1	m	1	16	21	0.108745	0.108745	GE4	3	210	11	7	m7	MedPosterior	6	17
1	m	1	16	22	0.246166	0.246166	GE4	3	210	11	8	m8	MedPosterior	6	18
1	m	1	16	23	0.0950765	0.0950765	GE4	3	210	11	9	m9	MedPosterior	6	19
1	m	1	16	24	0.326768	0.326768	GE4	3	210	11	10	m10	MedPosterior	6	20
1	m	1	16	25	0.484505	0.484505	GE4	3	210	11	10	m10	MedPosterior	6	20
1	m	1	16	26	0.0756209	0.0756209	GE4	3	210	11	10	m10	MedPosterior	6	20
1	m	1	17	191202b_1741	0.378812	0.378812	GE4	3	210	2	sim	Lsim	Lateral	2	3
1	m	1	17	2	3.07453	3.07453	GE4	3	210	2	sim	Lsim	Lateral	2	3
1	m	1	17	3	0.551555	0.551555	GE4	3	210	2	crus1	Lcrus1	Lateral	2	4
1	m	1	17	4	0.410035	0.410035	GE4	3	210	2	crus1	Lcrus1	Lateral	2	4
1	m	1	17	5	0.287106	0.287106	GE4	3	210	2	crus2	Lcrus2	Lateral	2	5
1	m	1	17	6	#DIV/0!		GE4	3	210	2	crus2	Lcrus2	Lateral
1	m	1	17	7	0.138858	0.138858	GE4	3	210	6	4/5	i4/5	IntAnterior	3	12
1	m	1	17	8	1.55718	1.55718	GE4	3	210	6	4/5	i4/5	IntAnterior	3	12
1	m	1	17	9	0.201624	0.201624	GE4	3	210	6	4/5	i4/5	IntAnterior	3	12
1	m	1	17	10	1.38216	1.38216	GE4	3	210	6	4/5	i4/5	IntAnterior	3	12
1	m	1	17	11	0.15582	0.15582	GE4	3	210	6	sim	isim	IntPosterior	4	7
1	m	1	17	12	0.123141	0.123141	GE4	3	210	6	pm	ipm	IntPosterior	4	10
1	m	1	17	13	0.111985	0.111985	GE4	3	210	11	2	m2	MedAnterior	5	13
1	m	1	17	14	0.0851909	0.0851909	GE4	3	210	11	2	m2	MedAnterior	5	13
1	m	1	17	15	0.0709734	0.0709734	GE4	3	210	11	2	m2	MedAnterior	5	13
1	m	1	17	16	0.109339	0.109339	GE4	3	210	11	2	m2	MedAnterior	5	13
1	m	1	17	17	0.0803126	0.0803126	GE4	3	210	11	3	m3	MedAnterior	5	14
1	m	1	17	18	0.0775464	0.0775464	GE4	3	210	11	3	m3	MedAnterior	5	14
1	m	1	17	19	#DIV/0!		GE4	3	210	11	3	m3	MedAnterior
1	m	1	17	20	0.185115	0.185115	GE4	3	210	11	4/5	m4/5	MedAnterior	5	15
1	m	1	17	21	0.0830972	0.0830972	GE4	3	210	11	4/5	m4/5	MedAnterior	5	15
1	m	1	17	22	0.573353	0.573353	GE4	3	210	11	4/5	m4/5	MedAnterior	5	15
1	m	1	17	23	0.120534	0.120534	GE4	3	210	11	6	m6	MedPosterior	6	16
1	m	1	17	24	#DIV/0!		GE4	3	210	11	6	m6	MedPosterior
1	m	1	17	25	#DIV/0!		GE4	3	210	11	7	m7	MedPosterior
1	m	1	17	26	0.108336	0.108336	GE4	3	210	11	7	m7	MedPosterior	6	17
1	m	1	17	27	0.0778406	0.0778406	GE4	3	210	11	8	m8	MedPosterior	6	18
1	m	1	17	28	0.303952	0.303952	GE4	3	210	11	8	m8	MedPosterior	6	18
1	m	1	17	29	0.0630876	0.0630876	GE4	3	210	11	9	m9	MedPosterior	6	19
1	m	1	17	30	0.0771604	0.0771604	GE4	3	210	11	9	m9	MedPosterior	6	19
1	m	1	17	31	0.102757	0.102757	GE4	3	210	11	10	m10	MedPosterior	6	20
1	m	1	17	32	0.0343837	0.0343837	GE4	3	210	11	10	m10	MedPosterior	6	20
1	f	0	19	191206_2167	3.74001	3.74001	GE3	2	120	3	Fl	LFl	Vestibular	1	2
1	f	0	19	2	#DIV/0!		GE3	2	120	3	PM	LPM	Lateral
1	f	0	19	3	#DIV/0!		GE3	2	120	3	PM	LPM	Lateral
1	f	0	19	4	0.39849	0.39849	GE3	2	120	3	Crus2	LCrus2	Lateral	2	5
1	f	0	19	5	0.39849	0.39849	GE3	2	120	3	Crus2	LCrus2	Lateral	2	5
1	f	0	19	6	0.151276	0.151276	GE3	2	120	3	Crus1	LCrus1	Lateral	2	4
1	f	0	19	7	0.637758	0.637758	GE3	2	120	3	Crus1	LCrus1	Lateral	2	4
1	f	0	19	8	0.136608	0.136608	GE3	2	120	3	Sim	LSim	Lateral	2	3
1	f	0	19	9	0.422379	0.422379	GE3	2	120	3	Sim	LSim	Lateral	2	3
1	f	0	19	10	0.260947	0.260947	GE3	2	120	6	4/5	i4/5	IntAnterior	3	12
1	f	0	19	11	#DIV/0!		GE3	2	120	6	Sim	iSim	IntPosterior
1	f	0	19	12	0.0990815	0.0990815	GE3	2	120	6	Crus1	iCrus1	IntPosterior	4	8
1	f	0	19	13	0.802474	0.802474	GE3	2	120	6	Crus2	iCrus2	IntPosterior	4	9
1	f	0	19	14	#DIV/0!		GE3	2	120	6	PM	iPM	IntPosterior
1	f	0	19	15	0.137424	0.137424	GE3	2	120	6	PM	iPM	IntPosterior	4	10
1	f	0	19	16	0.1106	0.1106	GE3	2	120	11	2	m2	MedAnterior	5	13
1	f	0	19	17	0.159306	0.159306	GE3	2	120	11	2	m2	MedAnterior	5	13
1	f	0	19	18	0.120538	0.120538	GE3	2	120	11	3	m3	MedAnterior	5	14
1	f	0	19	19	0.137063	0.137063	GE3	2	120	11	3	m3	MedAnterior	5	14
1	f	0	19	20	0.173368	0.173368	GE3	2	120	11	3	m3	MedAnterior	5	14
1	f	0	19	21	0.164643	0.164643	GE3	2	120	11	4/5	m4/5	MedAnterior	5	15
1	f	0	19	22	0.0669643	0.0669643	GE3	2	120	11	4/5	m4/5	MedAnterior	5	15
1	f	0	19	23	0.149884	0.149884	GE3	2	120	11	4/5	m4/5	MedAnterior	5	15
1	f	0	19	24	0.112441	0.112441	GE3	2	120	11	6	m6	MedPosterior	6	16
1	f	0	19	25	0.10801	0.10801	GE3	2	120	11	6	m6	MedPosterior	6	16
1	f	0	19	26	0.0958757	0.0958757	GE3	2	120	11	7	m7	MedPosterior	6	17
1	f	0	19	27	#DIV/0!		GE3	2	120	11	7	m7	MedPosterior
1	f	0	19	28	0.0722731	0.0722731	GE3	2	120	11	8	m8	MedPosterior	6	18
1	f	0	19	29	0.0688169	0.0688169	GE3	2	120	11	8	m8	MedPosterior	6	18
1	f	0	19	30	0.0823427	0.0823427	GE3	2	120	11	8	m8	MedPosterior	6	18
1	f	0	19	31	#DIV/0!		GE3	2	120
1	f	0	19	32	0.118109	0.118109	GE3	2	120	11	9	m9	MedPosterior	6	19
1	f	0	19	33	0.142225	0.142225	GE3	2	120	11	9	m9	MedPosterior	6	19
1	f	0	19	34	0.0738959	0.0738959	GE3	2	120	11	9	m9	MedPosterior	6	19
1	f	0	19	35	0.0979404	0.0979404	GE3	2	120	11	10	m10	MedPosterior	6	20
1	f	0	19	36	0.0803233	0.0803233	GE3	2	120	11	10	m10	MedPosterior	6	20
1	m	1	20	191217a_940	0.134269	0.134269	GE1	4	400	3	Fl	LFl	Vestibular	1	2
1	m	1	20	2	0.247253	0.247253	GE1	4	400	3	PFl	LPFl	Vestibular	1	1
1	m	1	20	3	#DIV/0!		GE1	4	400	3	Sim	LSim	Lateral	2	3
1	m	1	20	4	0.269549	0.269549	GE1	4	400	3	Sim	LSim	Lateral	2	3
1	m	1	20	5	0.792357	0.792357	GE1	4	400	3	Crus1	LCrus1	Lateral	2	4
1	m	1	20	6	0.157898	0.157898	GE1	4	400	3	Crus2	LCrus2	Lateral	2	5
1	m	1	20	7	0.348635	0.348635	GE1	4	400	3	PM	LPM	Lateral	2	6
1	m	1	20	8	0.120705	0.120705	GE1	4	400	3	PM	LPM	Lateral	2	6
1	m	1	20	9	0.307033	0.307033	GE1	4	400	6	Sim	iSim	IntPosterior	4	7
1	m	1	20	10	#DIV/0!		GE1	4	400	12	10	m10	MedPosterior
1	m	1	20	11	0.108223	0.108223	GE1	4	400	12	10	m10	MedPosterior	6	20
1	m	1	20	12	0.0772586	0.0772586	GE1	4	400	12	9	m9	MedPosterior	6	19
1	m	1	20	13	0.0806729	0.0806729	GE1	4	400	12	9	m9	MedPosterior	6	19
1	m	1	20	14	0.160312	0.160312	GE1	4	400	12	8	m8	MedPosterior	6	18
1	m	1	20	15	0.083955	0.083955	GE1	4	400	12	8	m8	MedPosterior	6	18
1	m	1	20	16	#DIV/0!		GE1	4	400	12	7	m7	MedPosterior
1	m	1	20	17	0.174172	0.174172	GE1	4	400	12	6	m6	MedPosterior	6	16
1	m	1	20	18	0.0908813	0.0908813	GE1	4	400	12	6	m6	MedPosterior	6	16
1	m	1	20	19	0.124635	0.124635	GE1	4	400	12	4/5	m4/5	MedAnterior	5	15
1	m	1	20	20	0.119234	0.119234	GE1	4	400	12	4/5	m4/5	MedAnterior	5	15
1	m	1	20	21	0.24187	0.24187	GE1	4	400	12	4/5	m4/5	MedAnterior	5	15
1	m	1	20	22	0.213043	0.213043	GE1	4	400	12	3	m3	MedAnterior	5	14
1	m	1	20	23	0.165129	0.165129	GE1	4	400	12	3	m3	MedAnterior	5	14
1	m	1	20	24	0.138789	0.138789	GE1	4	400	12	3	m3	MedAnterior	5	14
1	m	1	20	25	0.236269	0.236269	GE1	4	400	12	2	m2	MedAnterior	5	13
1	m	1	20	26	0.123583	0.123583	GE1	4	400	12	2	m2	MedAnterior	5	13
1	m	1	21	191217b_939	0.100561	0.100561	GE1	4	400	3	PFl	LPFl	Vestibular	1	1
1	m	1	21	2	0.17529	0.17529	GE1	4	400	3	PFl	LPFl	Vestibular	1	1
1	m	1	21	3	0.527081	0.527081	GE1	4	400	3	Fl	LFl	Vestibular	1	2
1	m	1	21	4	0.301664	0.301664	GE1	4	400	3	Crus1	LCrus1	Lateral	2	4
1	m	1	21	5	#DIV/0!		GE1	4	400	3	Crus1	LCrus1	Lateral
1	m	1	21	7	#DIV/0!		GE1	4	400	6	crus2	icrus2	IntPosterior
1	m	1	21	8	#DIV/0!		GE1	4	400	6	crus1	icrus1	IntPosterior	4	8
1	m	1	21	9	0.141098	0.141098	GE1	4	400	6	sim	isim	IntPosterior	4	7
1	m	1	21	10	0.781984	0.781984	GE1	4	400	12	2	m2	MedAnterior	5	13
1	m	1	21	11	0.106419	0.106419	GE1	4	400	12	2	m2	MedAnterior	5	13
1	m	1	21	12	0.102109	0.102109	GE1	4	400	12	3	m3	MedAnterior	5	14
1	m	1	21	13	0.168646	0.168646	GE1	4	400	12	3	m3	MedAnterior	5	14
1	m	1	21	14	0.344458	0.344458	GE1	4	400	12	4/5	m4/5	MedAnterior	5	15
1	m	1	21	15	0.189808	0.189808	GE1	4	400	12	4/5	m4/5	MedAnterior	5	15
1	m	1	21	16	0.304915	0.304915	GE1	4	400	12	6	m6	MedPosterior	6	16
1	m	1	21	17	0.115864	0.115864	GE1	4	400	12	7	m7	MedPosterior	6	17
1	m	1	21	18	0.144338	0.144338	GE1	4	400	12	6	m6	MedPosterior	6	16
1	m	1	21	19	#DIV/0!		GE1	4	400	12	8	m8	MedPosterior
1	m	1	21	20	0.153395	0.153395	GE1	4	400	12	9	m9	MedPosterior	6	19
1	m	1	21	21	0.104614	0.104614	GE1	4	400	12	9	m9	MedPosterior	6	19
1	m	1	21	22	#DIV/0!		GE1	4	400	12	9	m9	MedPosterior
1	m	1	21	23	0.0552087	0.0552087	GE1	4	400	12	10	m10	MedPosterior	6	20
1	m	1	21	24	0.130985	0.130985	GE1	4	400	12	10	m10	MedPosterior	6	20
1	m	1	22	191218a_962	0.0631326	0.0631326	GE1	4	400	3	Fl	LFl	Vestibular	1	2
1	m	1	22	2	#DIV/0!		GE1	4	400	3	Fl	LFl	Vestibular
1	m	1	22	3	0.107506	0.107506	GE1	4	400	3	PFl	LPFl	Vestibular	1	1
1	m	1	22	4	0.216148	0.216148	GE1	4	400	3	sim	Lsim	Lateral	2	3
1	m	1	22	5	0.241752	0.241752	GE1	4	400	3	sim	Lsim	Lateral	2	3
1	m	1	22	6	0.294793	0.294793	GE1	4	400	3	crus1	Lcrus1	Lateral	2	4
1	m	1	22	7	0.513796	0.513796	GE1	4	400	3	crus1	Lcrus1	Lateral	2	4
1	m	1	22	8	0.168353	0.168353	GE1	4	400	3	crus2	Lcrus2	Lateral	2	5
1	m	1	22	9	0.183164	0.183164	GE1	4	400	6	sim	isim	IntPosterior	4	7
1	m	1	22	10	0.15841	0.15841	GE1	4	400	6	crus2	icrus2	IntPosterior	4	9
1	m	1	22	11	0.213411	0.213411	GE1	4	400	6	PM	iPM	IntPosterior	4	10
1	m	1	22	12	0.0955191	0.0955191	GE1	4	400	12	2	m2	MedAnterior	5	13
1	m	1	22	13	0.107836	0.107836	GE1	4	400	12	2	m2	MedAnterior	5	13
1	m	1	22	14	0.113044	0.113044	GE1	4	400	12	2	m2	MedAnterior	5	13
1	m	1	22	15	0.0804875	0.0804875	GE1	4	400	12	3	m3	MedAnterior	5	14
1	m	1	22	16	0.137149	0.137149	GE1	4	400	12	3	m3	MedAnterior	5	14
1	m	1	22	17	0.127639	0.127639	GE1	4	400	12	4/5	m4/5	MedAnterior	5	15
1	m	1	22	18	0.164617	0.164617	GE1	4	400	12	4/5	m4/5	MedAnterior	5	15
1	m	1	22	19	#DIV/0!		GE1	4	400	12	4/5	m4/5	MedAnterior
1	m	1	22	20	0.113614	0.113614	GE1	4	400	12	6	m6	MedPosterior	6	16
1	m	1	22	21	0.0528865	0.0528865	GE1	4	400	12	6	m6	MedPosterior	6	16
1	m	1	22	22	#DIV/0!		GE1	4	400	12	7	m7	MedPosterior
1	m	1	22	23	0.0913851	0.0913851	GE1	4	400	12	8	m8	MedPosterior	6	18
1	m	1	22	24	0.096533	0.096533	GE1	4	400	12	8	m8	MedPosterior	6	18
1	m	1	22	25	0.101179	0.101179	GE1	4	400	12	9	m9	MedPosterior	6	19
1	m	1	22	26	0.107963	0.107963	GE1	4	400	12	9	m9	MedPosterior	6	19
1	m	1	22	27	0.0861081	0.0861081	GE1	4	400	12	10	m10	MedPosterior	6	20
1	m	1	22	28	0.125381	0.125381	GE1	4	400	12	10	m10	MedPosterior	6	20
1	f	0	23	191230a_1010	0.327385	0.327385	GE1	4	400	3	PFl	LPFl	Vestibular	1	1
1	f	0	23		0.204507	0.204507	GE1	4	400	3	PFl	LPFl	Vestibular	1	1
1	f	0	23		#DIV/0!		GE1	4	400	3
1	f	0	23		1.43855	1.43855	GE1	4	400	3	Crus1	LCrus1	Lateral	2	4
1	f	0	23		#DIV/0!		GE1	4	400	3	Crus2	LCrus2	Lateral
1	f	0	23		0.161837	0.161837	GE1	4	400	6	PM	iPM	IntPosterior	4	10
1	f	0	23		0.105239	0.105239	GE1	4	400	6	Crus1	iCrus1	IntPosterior	4	8
1	f	0	23		1.09717	1.09717	GE1	4	400	6	Sim	iSim	IntPosterior	4	7
1	f	0	23		0.096234	0.096234	GE1	4	400	6	4/5	i4/5	IntAnterior	3	12
1	f	0	23		0.111184	0.111184	GE1	4	400	12	2	m2	MedAnterior	5	13
1	f	0	23		0.128727	0.128727	GE1	4	400	12	2	m2	MedAnterior	5	13
1	f	0	23		0.0889569	0.0889569	GE1	4	400	12	2	m2	MedAnterior	5	13
1	f	0	23		0.0848695	0.0848695	GE1	4	400	12	3	m3	MedAnterior	5	14
1	f	0	23		0.228704	0.228704	GE1	4	400	12	3	m3	MedAnterior	5	14
1	f	0	23		0.187154	0.187154	GE1	4	400	12	3	m3	MedAnterior	5	14
1	f	0	23		0.217828	0.217828	GE1	4	400	12	4/5	m4/5	MedAnterior	5	15
1	f	0	23		0.0863821	0.0863821	GE1	4	400	12	4/5	m4/5	MedAnterior	5	15
1	f	0	23		0.318992	0.318992	GE1	4	400	12	4/5	m4/5	MedAnterior	5	15
1	f	0	23		#DIV/0!		GE1	4	400	12
1	f	0	23		0.39014	0.39014	GE1	4	400	12	6	m6	MedPosterior	6	16
1	f	0	23		0.0507582	0.0507582	GE1	4	400	12	6	m6	MedPosterior	6	16
1	f	0	23		0.126933	0.126933	GE1	4	400	12	7	m7	MedPosterior	6	17
1	f	0	23		0.108885	0.108885	GE1	4	400	12	8	m8	MedPosterior	6	18
1	f	0	23		0.0708882	0.0708882	GE1	4	400	12	8	m8	MedPosterior	6	18
1	f	0	23		0.0829832	0.0829832	GE1	4	400	12	9	m9	MedPosterior	6	19
1	f	0	23		0.0411588	0.0411588	GE1	4	400	12	9	m9	MedPosterior	6	19
1	f	0	23		0.0549154	0.0549154	GE1	4	400	12	10	m10	MedPosterior	6	20
1	f	0	23		0.0432274	0.0432274	GE1	4	400	12	10	m10	MedPosterior	6	20
1	f	0	23		0.0466095	0.0466095	GE1	4	400	12	10	m10	MedPosterior	6	20
1	f	0	24	191230b_1009	0.228651	0.228651	GE1	4	400	3	PFl	LPFl	Vestibular	1	1
1	f	0	24	2	0.212297	0.212297	GE1	4	400	3	PM	LPM	Lateral	2	6
1	f	0	24	3	0.476259	0.476259	GE1	4	400	3	PM	LPM	Lateral	2	6
1	f	0	24	4	0.436649	0.436649	GE1	4	400	3	Crus2	LCrus2	Lateral	2	5
1	f	0	24	5	#DIV/0!		GE1	4	400	3	Crus1	LCrus1	Lateral
1	f	0	24	6	0.217518	0.217518	GE1	4	400	3	Crus1	LCrus1	Lateral	2	4
1	f	0	24	7	0.364157	0.364157	GE1	4	400	3	Sim	LSim	Lateral	2	3
1	f	0	24	8	0.16583	0.16583	GE1	4	400	3	Sim	LSim	Lateral	2	3
1	f	0	24	9	#DIV/0!		GE1	4	400	6	cop	icop	IntPosterior	4	11
1	f	0	24	10	1.9627	1.9627	GE1	4	400	6	PM	iPM	IntPosterior	4	10
1	f	0	24	11	0.137499	0.137499	GE1	4	400	6	Crus2	iCrus2	IntPosterior	4	9
1	f	0	24	12	2.13141	2.13141	GE1	4	400	6	Sim	iSim	IntPosterior	4	7
1	f	0	24	13	0.0838143	0.0838143	GE1	4	400	12	2	m2	MedAnterior	5	13
1	f	0	24	14	0.108186	0.108186	GE1	4	400	12	2	m2	MedAnterior	5	13
1	f	0	24	15	0.0696733	0.0696733	GE1	4	400	12	3	m3	MedAnterior	5	14
1	f	0	24	16	0.0813773	0.0813773	GE1	4	400	12	3	m3	MedAnterior	5	14
1	f	0	24	17	0.181933	0.181933	GE1	4	400	12	4/5	m4/5	MedAnterior	5	15
1	f	0	24	18	0.0966948	0.0966948	GE1	4	400	12	4/5	m4/5	MedAnterior	5	15
1	f	0	24	19	0.0897202	0.0897202	GE1	4	400	12	4/5	m4/5	MedAnterior	5	15
1	f	0	24	20	0.13277	0.13277	GE1	4	400	12	6	m6	MedPosterior	6	16
1	f	0	24	21	0.164288	0.164288	GE1	4	400	12	6	m6	MedPosterior	6	16
1	f	0	24	22	#DIV/0!		GE1	4	400	12	7	m7	MedPosterior
1	f	0	24	23	0.237577	0.237577	GE1	4	400	12	7	m7	MedPosterior	6	17
1	f	0	24	24	0.130393	0.130393	GE1	4	400	12	8	m8	MedPosterior	6	18
1	f	0	24	25	0.289516	0.289516	GE1	4	400	12	8	m8	MedPosterior	6	18
1	f	0	24	26	0.0767342	0.0767342	GE1	4	400	12	9	m9	MedPosterior	6	19
1	f	0	24	27	0.126866	0.126866	GE1	4	400	12	9	m9	MedPosterior	6	19
1	f	0	24	28	0.104017	0.104017	GE1	4	400	12	9	m9	MedPosterior	6	19
1	f	0	24	29	0.0627358	0.0627358	GE1	4	400	12	10	m10	MedPosterior	6	20
1	f	0	24	30	0.0938026	0.0938026	GE1	4	400	12	10	m10	MedPosterior	6	20
1	f	0	25	200103b_969	0.240052	0.240052	GE1	4	400	3	Fl	LFl	Vestibular	1	2
1	f	0	25	2	0.153597	0.153597	GE1	4	400	3	Fl	LFl	Vestibular	1	2
1	f	0	25	3	0.508249	0.508249	GE1	4	400	3	Sim	LSim	Lateral	2	3
1	f	0	25	4	0.0821349	0.0821349	GE1	4	400	3	Crus1	LCrus1	Lateral	2	4
1	f	0	25	5	0.299484	0.299484	GE1	4	400	3	PM	LPM	Lateral	2	6
1	f	0	25	6	0.213088	0.213088	GE1	4	400	6	Cop	iCop	IntPosterior	4	11
1	f	0	25	7	0.180026	0.180026	GE1	4	400	6	Crus2	iCrus2	IntPosterior	4	9
1	f	0	25	8	0.169484	0.169484	GE1	4	400	6	Crus1	iCrus1	IntPosterior	4	8
1	f	0	25	9	0.13143	0.13143	GE1	4	400	6	PM	iPM	IntPosterior	4	10
1	f	0	25	10	0.239858	0.239858	GE1	4	400	6	4/5	i4/5	IntAnterior	3	12
1	f	0	25	11	0.0801958	0.0801958	GE1	4	400	12	2	m2	MedAnterior	5	13
1	f	0	25	12	0.105446	0.105446	GE1	4	400	12	2	m2	MedAnterior	5	13
1	f	0	25	13	#DIV/0!		GE1	4	400	12	2	m2	MedAnterior
1	f	0	25	14	0.118836	0.118836	GE1	4	400	12	3	m3	MedAnterior	5	14
1	f	0	25	15	0.126835	0.126835	GE1	4	400	12	3	m3	MedAnterior	5	14
1	f	0	25	16	0.104785	0.104785	GE1	4	400	12	3	m3	MedAnterior	5	14
1	f	0	25	17	0.095631	0.095631	GE1	4	400	12	4/5	m4/5	MedAnterior	5	15
1	f	0	25	18	0.0534444	0.0534444	GE1	4	400	12	4/5	m4/5	MedAnterior	5	15
1	f	0	25	19	0.0952463	0.0952463	GE1	4	400	12	4/5	m4/5	MedAnterior	5	15
1	f	0	25	20	0.219776	0.219776	GE1	4	400	12	6	m6	MedPosterior	6	16
1	f	0	25	21	0.0594681	0.0594681	GE1	4	400	12	6	m6	MedPosterior	6	16
1	f	0	25	22	#DIV/0!		GE1	4	400	12	7	m7	MedPosterior
1	f	0	25	23	0.104478	0.104478	GE1	4	400	12	8	m8	MedPosterior	6	18
1	f	0	25	24	0.0740977	0.0740977	GE1	4	400	12	9	m9	MedPosterior	6	19
1	f	0	25	25	0.0680027	0.0680027	GE1	4	400	12	9	m9	MedPosterior	6	19
1	f	0	25	26	0.0734361	0.0734361	GE1	4	400	12	9	m9	MedPosterior	6	19
1	f	0	25	27	0.124317	0.124317	GE1	4	400	12	10	m10	MedPosterior	6	20
1	f	0	25	28	0.0522858	0.0522858	GE1	4	400	12	10	m10	MedPosterior	6	20
1	f	0	26	200107_1018	0.260694	0.260694	GE1	4	400	2	Fl	LFl	Vestibular	1	2
1	f	0	26	2	0.106675	0.106675	GE1	4	400	2	Fl	LFl	Vestibular	1	2
1	f	0	26	3	0.494926	0.494926	GE1	4	400	2	PFl	LPFl	Vestibular	1	1
1	f	0	26	4	0.915262	0.915262	GE1	4	400	6	sim	isim	IntPosterior	4	7
1	f	0	26	5	0.147814	0.147814	GE1	4	400	6	sim	isim	IntPosterior	4	7
1	f	0	26	6	0.120233	0.120233	GE1	4	400	6	crus1	icrus1	IntPosterior	4	8
1	f	0	26	7	0.0999813	0.0999813	GE1	4	400	6	crus1	icrus1	IntPosterior	4	8
1	f	0	26	8	0.151618	0.151618	GE1	4	400	6	crus2	icrus2	IntPosterior	4	9
1	f	0	26	9	0.178344	0.178344	GE1	4	400	6	crus2	icrus2	IntPosterior	4	9
1	f	0	26	10	0.218251	0.218251	GE1	4	400	6	PM	iPM	IntPosterior	4	10
1	f	0	26	11	0.110287	0.110287	GE1	4	400	12	2	m2	MedAnterior	5	13
1	f	0	26	12	0.0600194	0.0600194	GE1	4	400	12	2	m2	MedAnterior	5	13
1	f	0	26	13	0.0765446	0.0765446	GE1	4	400	12	2	m2	MedAnterior	5	13
1	f	0	26	14	0.121032	0.121032	GE1	4	400	12	3	m3	MedAnterior	5	14
1	f	0	26	15	0.096383	0.096383	GE1	4	400	12	3	m3	MedAnterior	5	14
1	f	0	26	16	0.111971	0.111971	GE1	4	400	12	3	m3	MedAnterior	5	14
1	f	0	26	17	0.119748	0.119748	GE1	4	400	12	4/5	m4/5	MedAnterior	5	15
1	f	0	26	18	0.0802166	0.0802166	GE1	4	400	12	4/5	m4/5	MedAnterior	5	15
1	f	0	26	19	0.0847437	0.0847437	GE1	4	400	12	4/5	m4/5	MedAnterior	5	15
1	f	0	26	20	0.151912	0.151912	GE1	4	400	12	6	m6	MedPosterior	6	16
1	f	0	26	21	0.144388	0.144388	GE1	4	400	12	6	m6	MedPosterior	6	16
1	f	0	26	22	1.42002	1.42002	GE1	4	400	12	6	m6	MedPosterior	6	16
1	f	0	26	23	0.0742927	0.0742927	GE1	4	400	12	7	m7	MedPosterior	6	17
1	f	0	26	24	#DIV/0!		GE1	4	400	12	7	m7	MedPosterior	6	17
1	f	0	26	25	0.0524794	0.0524794	GE1	4	400	12	8	m8	MedPosterior	6	18
1	f	0	26	26	0.0403894	0.0403894	GE1	4	400	12	8	m8	MedPosterior	6	18
1	f	0	26	27	0.0947623	0.0947623	GE1	4	400	12	9	m9	MedPosterior	6	19
1	f	0	26	28	0.0332242	0.0332242	GE1	4	400	12	9	m9	MedPosterior	6	19
1	f	0	26	29	0.0790166	0.0790166	GE1	4	400	12	9	m9	MedPosterior	6	19
1	f	0	26	30	0.0562529	0.0562529	GE1	4	400	12	10	m10	MedPosterior	6	20
1	f	0	26	31	0.118992	0.118992	GE1	4	400	12	10	m10	MedPosterior	6	20
1	f	0	27	200127a_2035	0.991173	0.991173	GE4	3	210	3	crus1	Lcrus1	Lateral	2	4
1	f	0	27		#DIV/0!		GE4	3	210	3	crus2	Lcrus2	Lateral	2	5
1	f	0	27		0.944851	0.944851	GE4	3	210	6	pm	ipm	IntPosterior	4	10
1	f	0	27		0.160656	0.160656	GE4	3	210	6	crus1	icrus1	IntPosterior	4	8
1	f	0	27		#DIV/0!		GE4	3	210	6
1	f	0	27		0.119313	0.119313	GE4	3	210	12	2	m2	MedAnterior	5	13
1	f	0	27		0.118894	0.118894	GE4	3	210	12	2	m2	MedAnterior	5	13
1	f	0	27		0.169519	0.169519	GE4	3	210	12	3	m3	MedAnterior	5	14
1	f	0	27		0.10982	0.10982	GE4	3	210	12	3	m3	MedAnterior	5	14
1	f	0	27		0.128603	0.128603	GE4	3	210	12	4/5	m4/5	MedAnterior	5	15
1	f	0	27		0.240755	0.240755	GE4	3	210	12	4/5	m4/5	MedAnterior	5	15
1	f	0	27		0.115032	0.115032	GE4	3	210	12	4/5	m4/5	MedAnterior	5	15
1	f	0	27		0.203207	0.203207	GE4	3	210	12	6	m6	MedPosterior	6	16
1	f	0	27		0.164707	0.164707	GE4	3	210	12	6	m6	MedPosterior	6	16
1	f	0	27		0.0987604	0.0987604	GE4	3	210	12	7	m7	MedPosterior	6	17
1	f	0	27		0.187813	0.187813	GE4	3	210	12	8	m8	MedPosterior	6	18
1	f	0	27		0.0815634	0.0815634	GE4	3	210	12	8	m8	MedPosterior	6	18
1	f	0	27		0.0697006	0.0697006	GE4	3	210	12	9	m9	MedPosterior	6	19
1	f	0	27		0.119895	0.119895	GE4	3	210	12	9	m9	MedPosterior	6	19
1	f	0	27		0.150152	0.150152	GE4	3	210	12	9	m9	MedPosterior	6	19
1	f	0	27		0.108019	0.108019	GE4	3	210	12	10	m10	MedPosterior	6	20
1	f	0	27		0.0743683	0.0743683	GE4	3	210	12	10	m10	MedPosterior	6	20
1	f	0	28	200127b_2018	0.273905	0.273905	GE4	3	210	3	PFl	LPFl	Vestibular	1	1
1	f	0	28	2	0.371891	0.371891	GE4	3	210	3	PFl	LPFl	Vestibular	1	1
1	f	0	28	3	0.0823214	0.0823214	GE4	3	210	3	Fl	LFl	Vestibular	1	2
1	f	0	28	4	0.255171	0.255171	GE4	3	210	3	sim	Lsim	Lateral	2	3
1	f	0	28	5	0.253992	0.253992	GE4	3	210	3	crus1	Lcrus1	Lateral	2	4
1	f	0	28	6	0.147488	0.147488	GE4	3	210	3	crus2	Lcrus2	Lateral	2	5
1	f	0	28	7	0.187288	0.187288	GE4	3	210	3	PM	LPM	Lateral	2	6
1	f	0	28	8	0.0965202	0.0965202	GE4	3	210	6	sim	isim	IntPosterior	4	7
1	f	0	28	9	0.116738	0.116738	GE4	3	210	6	crus1	icrus1	IntPosterior	4	8
1	f	0	28	10	0.0747111	0.0747111	GE4	3	210	6	pm	ipm	IntPosterior	4	10
1	f	0	28	11	0.129126	0.129126	GE4	3	210	12	2	m2	MedAnterior	5	13
1	f	0	28	12	0.118446	0.118446	GE4	3	210	12	2	m2	MedAnterior	5	13
1	f	0	28	13	0.15633	0.15633	GE4	3	210	12	3	m3	MedAnterior	5	14
1	f	0	28	14	0.117771	0.117771	GE4	3	210	12	3	m3	MedAnterior	5	14
1	f	0	28	15	0.131142	0.131142	GE4	3	210	12	4/5	m4/5	MedAnterior	5	15
1	f	0	28	16	0.103603	0.103603	GE4	3	210	12	4/5	m4/5	MedAnterior	5	15
1	f	0	28	17	0.103723	0.103723	GE4	3	210	12	4/5	m4/5	MedAnterior	5	15
1	f	0	28	18	0.120976	0.120976	GE4	3	210	12	6	m6	MedPosterior	6	16
1	f	0	28	19	0.0756285	0.0756285	GE4	3	210	12	6	m6	MedPosterior	6	16
1	f	0	28	20	0.090119	0.090119	GE4	3	210	12	7	m7	MedPosterior	6	17
1	f	0	28	21	0.0792269	0.0792269	GE4	3	210	12	8	m8	MedPosterior	6	18
1	f	0	28	22	0.0976668	0.0976668	GE4	3	210	12	8	m8	MedPosterior	6	18
1	f	0	28	23	0.092164	0.092164	GE4	3	210	12	9	m9	MedPosterior	6	19
1	f	0	28	24	0.0583621	0.0583621	GE4	3	210	12	9	m9	MedPosterior	6	19
1	f	0	28	25	0.0625387	0.0625387	GE4	3	210	12	9	m9	MedPosterior	6	19
1	f	0	28	26	0.0611584	0.0611584	GE4	3	210	12	10	m10	MedPosterior	6	20
1	f	0	28	27	0.0423323	0.0423323	GE4	3	210	12	10	m10	MedPosterior	6	20
1	m	1	29	200221_2087	1.9953	1.9953	GE4	3	210	3		LPFl	Vestibular	1	1
1	m	1	29		0.114095	0.114095	GE4	3	210	3		lFl	Vestibular	1	2
1	m	1	29		0.246147	0.246147	GE4	3	210	3		lPFl	Vestibular	1	1
1	m	1	29		#DIV/0!		GE4	3	210	3		lCrus2	Lateral
1	m	1	29		#DIV/0!		GE4	3	210	3		lCrus2	Lateral
1	m	1	29		0.193496	0.193496	GE4	3	210	3		lCrus1	Lateral	2	4
1	m	1	29		#DIV/0!		GE4	3	210	3		lSim	Lateral
1	m	1	29		0.124771	0.124771	GE4	3	210	6		iCop	IntPosterior	4	11
1	m	1	29		#DIV/0!		GE4	3	210	6		iPM	IntPosterior
1	m	1	29		0.228386	0.228386	GE4	3	210	6		iCrus2	IntPosterior	4	9
1	m	1	29		#DIV/0!		GE4	3	210	6		iCrus2	IntPosterior
1	m	1	29		0.139441	0.139441	GE4	3	210	6		iCrus1	IntPosterior	4	8
1	m	1	29		0.101808	0.101808	GE4	3	210	6		iSim	IntPosterior	4	7
1	m	1	29		0.459102	0.459102	GE4	3	210	6		i4/5	IntAnterior	3	12
1	m	1	29		0.113839	0.113839	GE4	3	210	12		m2	MedAnterior	5	13
1	m	1	29		0.0873498	0.0873498	GE4	3	210	12		m2	MedAnterior	5	13
1	m	1	29		0.105123	0.105123	GE4	3	210	12		m3	MedAnterior	5	14
1	m	1	29		0.0958907	0.0958907	GE4	3	210	12		m3	MedAnterior	5	14
1	m	1	29		0.0973274	0.0973274	GE4	3	210	12		m4/5	MedAnterior	5	15
1	m	1	29		0.0764244	0.0764244	GE4	3	210	12		m4/5	MedAnterior	5	15
1	m	1	29		0.0840137	0.0840137	GE4	3	210	12		m4/5	MedAnterior	5	15
1	m	1	29		0.103386	0.103386	GE4	3	210	12		m6	MedPosterior	6	16
1	m	1	29		0.0699755	0.0699755	GE4	3	210	12		m6	MedPosterior	6	16
1	m	1	29		0.129451	0.129451	GE4	3	210	12		m7	MedPosterior	6	17
1	m	1	29		0.107769	0.107769	GE4	3	210	12		m8	MedPosterior	6	18
1	m	1	29		#DIV/0!		GE4	3	210	12		m8	MedPosterior
1	m	1	29		0.0513591	0.0513591	GE4	3	210	12		m9	MedPosterior	6	19
1	m	1	29		0.0534937	0.0534937	GE4	3	210	12		m9	MedPosterior	6	19
1	m	1	29		0.0697868	0.0697868	GE4	3	210	12		m9	MedPosterior	6	19
1	m	1	29		0.0875167	0.0875167	GE4	3	210	12		m10	MedPosterior	6	20
1	m	1	29		0.0557711	0.0557711	GE4	3	210	12		m10	MedPosterior	6	20
						0.433314
						#VALUE!
						0.108926
						0.099519

## Sheet: AtmN N; Aptx- -
AtmN/N; Aptx-/-			Total # of animals	23
Genotype	sex	sex code (1=m)	sex code (1=m)	Exp. Date_Animal ID	Average frequency	Average frequency	Group	Age	Age days	slice	folia	Position name	Region name	Gross Region ID	Position ID								1-5 vs 6-10
2	f	0	1	190409a_1382	0.433314	0.433314	GE2	1	45	3	sim	Lsim	Lateral	2	3		All time points		N	23									m					f
2	f	0	1	2	#DIV/0!		GE2	1	45	3	crus1			#N/A	#N/A		By Position ID	average	stdev	n	sem		By major regions	average	stdev	n	sem		average	stdev	n	sem		average	stdev	n	sem
2	f	0	1	3	0.108926	0.108926	GE2	1	45	3	pm	Lpm	Lateral	2	6		Lpfl	0.186344	0.098039	17	0.023778	1	Vestibular	0.238485	0.405011	28	0.0765399	1	0.259685	0.450594	22	0.096067		0.279997	0.180685	6	0.0737645
2	f	0	1	4	0.099519	0.099519	GE2	1	45	6	4/5	i4/5	IntAnterior	3	12		Lfl	0.384109	0.633555	11	0.191024	2	Lateral	0.390085	0.45185	96	0.0461168	2	0.395753	0.507646	63	0.0639574		0.39743	0.326835	33	0.0568947
2	f	0	1	5	0.320322	0.320322	GE2	1	45	6	pm	ipm	IntPosterior	4	10		Lsim	0.441166	0.555396	18	0.130908	3	IntAnterior	0.24347	0.1532	23	0.0319443	3	0.193706	0.12096	13	0.0335482		0.308164	0.17215	10	0.0544386
2	f	0	1	6	0.591861	0.591861	GE2	1	45	6	sim	isim	IntPosterior	4	7		Lcrus1	0.409606	0.307279	31	0.0551889	4	IntPosterior	0.199828	0.157371	114	0.0147391	4	0.176771	0.123526	74	0.0143596		0.257469	0.197129	40	0.0311689
2	f	0	1	7	#DIV/0!		GE2	1	45					#N/A	#N/A		Lcrus2	0.46246	0.606026	29	0.112536	5	MedAnterior	0.151409	0.150283	186	0.0110193	5	0.145057	0.170402	105	0.0166295		0.161514	0.119687	81	0.0132986
2	f	0	1	8	0.0714104	0.0714104	GE2	1	45	9	10	m10	MedPosterior	6	20		Lpm	0.199884	0.103151	17	0.0250177	6	MedPosterior	0.143073	0.13976	222	0.00938007	6	0.140356	0.159117	122	0.0144058		0.154972	0.111984	100	0.0111984
2	f	0	1	9	0.100699	0.100699	GE2	1	45	9	10	m10	MedPosterior	6	20		isim	0.227126	0.195087	40	0.030846	7
2	f	0	1	10	0.112326	0.112326	GE2	1	45	9	10	m10	MedPosterior	6	20		icrus1	0.169149	0.0870114	19	0.0199618	8
2	f	0	1	11	0.132508	0.132508	GE2	1	45	9	9	m9	MedPosterior	6	19		icrus2	0.173665	0.111981	18	0.0263942	9
2	f	0	1	12	0.296143	0.296143	GE2	1	45	9	9	m9	MedPosterior	6	19		ipm	0.195146	0.119946	22	0.0255726	10
2	f	0	1	13	0.112507	0.112507	GE2	1	45	9	9	m9	MedPosterior	6	19		icop	0.244118	0.202812	15	0.0523657	11
2	f	0	1	14	0.297431	0.297431	GE2	1	45	9	8	m8	MedPosterior	6	18		i4/5	0.24347	0.1532	23	0.0319443	12
2	f	0	1	15	0.190562	0.190562	GE2	1	45	9	8	m8	MedPosterior	6	18		m2	0.139868	0.121447	51	0.017006	13
2	f	0	1	16	0.172286	0.172286	GE2	1	45	9	8	m8	MedPosterior	6	18		m3	0.155236	0.112665	66	0.0138681	14
2	f	0	1	17	0.119766	0.119766	GE2	1	45	9	7	m7	MedPosterior	6	17		m4/5	0.158475	0.195711	69	0.0235608	15
2	f	0	1	18	0.189302	0.189302	GE2	1	45	9	7	m7	MedPosterior	6	17		m6	0.174411	0.12219	47	0.0178233	16
2	f	0	1	19	0.0905054	0.0905054	GE2	1	45	9	6	m6	MedPosterior	6	16		m7	0.113559	0.0596452	20	0.0133371	17
2	f	0	1	20	0.23396	0.23396	GE2	1	45	9	6	m6	MedPosterior	6	16		m8	0.149265	0.0662081	45	0.00986972	18
2	f	0	1	21	0.481747	0.481747	GE2	1	45	9	6	m6	MedPosterior	6	16		m9	0.154835	0.216798	61	0.0277582	19
2	f	0	1	22	0.109831	0.109831	GE2	1	45	9	4/5	m4/5	MedAnterior	5	15		m10	0.122251	0.0976522	49	0.0139503	20
2	f	0	1	23	#DIV/0!		GE2	1	45	9	4/5			#N/A	#N/A
2	f	0	1	24	0.189352	0.189352	GE2	1	45	9	4/5	m4/5	MedAnterior	5	15
2	f	0	1	25	#DIV/0!		GE2	1	45	9	4/5			#N/A	#N/A
2	f	0	1	26	0.115465	0.115465	GE2	1	45	9	3	m3	MedAnterior	5	14
2	f	0	1	27	0.109519	0.109519	GE2	1	45	9	3	m3	MedAnterior	5	14
2	f	0	1	28	0.237544	0.237544	GE2	1	45	9	3	m3	MedAnterior	5	14
2	f	0	1	29	0.10303	0.10303	GE2	1	45	9	2	m2	MedAnterior	5	13
2	f	0	1	30	0.11713	0.11713	GE2	1	45	9	2	m2	MedAnterior	5	13
2	f	0	1	31	0.119342	0.119342	GE2	1	45	9	2	m2	MedAnterior	5	13
2	f	0	2	190409b_1385	0.216728	0.216728	GE2	1	45	3	crus1	Lcrus1	Lateral	2	4
2	f	0	2	2	0.136258	0.136258	GE2	1	45	3	crus1	Lcrus1	Lateral	2	4
2	f	0	2	3	0.128623	0.128623	GE2	1	45	3	sim	Lsim	Lateral	2	3
2	f	0	2	4	0.346809	0.346809	GE2	1	45	3	sim	Lsim	Lateral	2	3
2	f	0	2	5	0.383225	0.383225	GE2	1	45	6	cop	icop	IntPosterior	4	11
2	f	0	2	6	0.0844326	0.0844326	GE2	1	45	6	cop	icop	IntPosterior	4	11
2	f	0	2	7	0.320788	0.320788	GE2	1	45	6	pm	ipm	IntPosterior	4	10
2	f	0	2	8	0.389548	0.389548	GE2	1	45	6	pm	ipm	IntPosterior	4	10
2	f	0	2	9	0.143988	0.143988	GE2	1	45	6	pm	ipm	IntPosterior	4	10
2	f	0	2	10	0.121013	0.121013	GE2	1	45	6	sim	isim	IntPosterior	4	7		GE2	45 days	N	8									m					f
2	f	0	2	11	0.104107	0.104107	GE2	1	45	6	sim	isim	IntPosterior	4	7		By Position ID	average	stdev	n	sem		By major regions	average	stdev	n	sem		average	stdev	n	sem		average	stdev	n	sem
2	f	0	2	12	0.129933	0.129933	GE2	1	45	6	sim	isim	IntPosterior	4	7		Lpfl	0.234175	0.126854	4	0.0634268		Vestibular	0.234175	0.126854	4	0.0634268		0.21851	0.163785	2	0.115814		0.249839	0.143068	2	0.101164
2	f	0	2	13	0.207998	0.207998	GE2	1	45	6	sim	isim	IntPosterior	4	7		Lfl	#DIV/0!	#DIV/0!	0	#DIV/0!		Lateral	0.406129	0.538827	35	0.0910785		0.454792	0.637557	22	0.135928		0.323778	0.315578	13	0.0875256
2	f	0	2	14	0.186731	0.186731	GE2	1	45	6	sim	isim	IntPosterior	4	7		Lsim	0.263363	0.140823	7	0.053226		IntAnterior	0.169661	0.117431	8	0.0415182		0.143626	0.0734365	5	0.0328418		0.213052	0.181551	3	0.104818
2	f	0	2	15	0.117197	0.117197	GE2	1	45	6	4/5	i4/5	IntAnterior	3	12		Lcrus1	0.340933	0.314605	14	0.0840818		IntPosterior	0.19032	0.119109	47	0.0173738		0.160833	0.0953555	28	0.0180205		0.233774	0.138819	19	0.0318472
2	f	0	2	16	0.167526	0.167526	GE2	1	45	9	2	m2	MedAnterior	5	13		Lcrus2	0.698464	0.891028	10	0.281768		MedAnterior	0.143618	0.0912344	70	0.0109046		0.127418	0.0618249	38	0.0100293		0.162856	0.115157	32	0.0203571
2	f	0	2	17	0.0622701	0.0622701	GE2	1	45	9	2	m2	MedAnterior	5	13		Lpm	0.15332	0.0513171	4	0.0256585		MedPosterior	0.139177	0.0808807	86	0.00872159		0.133044	0.0688117	43	0.0104937		0.14531	0.0944464	43	0.0144029
2	f	0	2	18	0.134199	0.134199	GE2	1	45	9	2	m2	MedAnterior	5	13		isim	0.198176	0.127866	19	0.0293344
2	f	0	2	19	0.156575	0.156575	GE2	1	45	9	3	m3	MedAnterior	5	14		icrus1	0.126758	0.0303309	7	0.011464
2	f	0	2	20	0.267592	0.267592	GE2	1	45	9	3	m3	MedAnterior	5	14		icrus2	0.238832	0.150052	7	0.0567142
2	f	0	2	21	0.243665	0.243665	GE2	1	45	9	3	m3	MedAnterior	5	14		ipm	0.188376	0.113441	10	0.0358731
2	f	0	2	22	0.0964125	0.0964125	GE2	1	45	9	4/5	m4/5	MedAnterior	5	15		icop	0.184199	0.136327	4	0.0681635
2	f	0	2	23	0.104917	0.104917	GE2	1	45	9	4/5	m4/5	MedAnterior	5	15		i4/5	0.169661	0.117431	8	0.0415182
2	f	0	2	24	0.138245	0.138245	GE2	1	45	9	4/5	m4/5	MedAnterior	5	15		m2	0.136715	0.0689253	17	0.0167168
2	f	0	2	25	0.102843	0.102843	GE2	1	45	9	6	m6	MedPosterior	6	16		m3	0.164707	0.135288	24	0.0276155
2	f	0	2	26	0.0792229	0.0792229	GE2	1	45	9	6	m6	MedPosterior	6	16		m4/5	0.130211	0.0465466	29	0.00864349
2	f	0	2	27	0.0793715	0.0793715	GE2	1	45	9	8	m8	MedPosterior	6	18		m6	0.185143	0.114201	19	0.0261996
2	f	0	2	28	0.139113	0.139113	GE2	1	45	9	8	m8	MedPosterior	6	18		m7	0.11236	0.0489684	9	0.0163228
2	f	0	2	29	0.104562	0.104562	GE2	1	45	9	9	m9	MedPosterior	6	19		m8	0.155741	0.0657868	16	0.0164467
2	f	0	2	30	0.206954	0.206954	GE2	1	45	9	9	m9	MedPosterior	6	19		m9	0.130858	0.0638855	23	0.0133211
2	f	0	2	31	0.0579498	0.0579498	GE2	1	45	9	9	m9	MedPosterior	6	19		m10	0.102036	0.0617287	19	0.0141615
2	f	0	2	32	0.0707146	0.0707146	GE2	1	45	9	9	m9	MedPosterior	6	19
2	f	0	2	33	0.078443	0.078443	GE2	1	45	9	10	m10	MedPosterior	6	20
2	f	0	2	34	0.0760429	0.0760429	GE2	1	45	9	10	m10	MedPosterior	6	20
2	m	1	3	190411a_1412	0.210257	0.210257	GE2	1	45	2	crus2	Lcrus2	Lateral	2	5
2	m	1	3	2	0.363449	0.363449	GE2	1	45	2	crus2	Lcrus2	Lateral	2	5
2	m	1	3	3	0.150376	0.150376	GE2	1	45	2	crus2	Lcrus2	Lateral	2	5
2	m	1	3	4	0.247617	0.247617	GE2	1	45	2	crus1	Lcrus1	Lateral	2	4
2	m	1	3	5	0.256244	0.256244	GE2	1	45	2	crus1	Lcrus1	Lateral	2	4
2	m	1	3	6	0.249332	0.249332	GE2	1	45	2	crus1	Lcrus1	Lateral	2	4
2	m	1	3	7	0.136931	0.136931	GE2	1	45	6	4/5	i4/5	IntAnterior	3	12
2	m	1	3	8	0.140652	0.140652	GE2	1	45	6	4/5	i4/5	IntAnterior	3	12
2	m	1	3	9	0.1133	0.1133	GE2	1	45	6	4/5	i4/5	IntAnterior	3	12
2	m	1	3	10	0.304072	0.304072	GE2	1	45	6	crus2	icrus2	IntPosterior	4	9
2	m	1	3	11	0.100222	0.100222	GE2	1	45	6	crus2	icrus2	IntPosterior	4	9
2	m	1	3	12	0.0683307	0.0683307	GE2	1	45	6	crus2	icrus2	IntPosterior	4	9
2	m	1	3	13	0.168286	0.168286	GE2	1	45	6	pm	ipm	IntPosterior	4	10
2	m	1	3	14	0.100571	0.100571	GE2	1	45	6	pm	ipm	IntPosterior	4	10
2	m	1	3	15	0.0553985	0.0553985	GE2	1	45	6	pm	ipm	IntPosterior	4	10
2	m	1	3	16	0.117621	0.117621	GE2	1	45	9	10	m10	MedPosterior	6	20
2	m	1	3	17	0.0703456	0.0703456	GE2	1	45	9	10	m10	MedPosterior	6	20		GE3	120 days	N	8									m	N	4			f	N	4
2	m	1	3	18	0.119649	0.119649	GE2	1	45	9	9	m9	MedPosterior	6	19		By Position ID	average	stdev	n	sem		By major regions	average	stdev	n	sem		average	stdev	n	sem		average	stdev	n	sem
2	m	1	3	19	0.117188	0.117188	GE2	1	45	9	9	m9	MedPosterior	6	19		Lpfl	0.198639	0.0873792	6	0.0356724		Vestibular	0.159687	0.0911298	9	0.0303766		0.144144	0.102569	6	0.0418735		0.190772	0.0688739	3	0.0397644
2	m	1	3	20	0.204889	0.204889	GE2	1	45	9	9	m9	MedPosterior	6	19		Lfl	0.0817811	0.0217929	3	0.0125821		Lateral	0.348057	0.26591	32	0.0470067		0.344103	0.314469	18	0.0741211		0.35314	0.198099	14	0.0529441
2	m	1	3	21	#DIV/0!		GE2	1	45	9	8	m8	MedPosterior	6	18		Lsim	0.288666	0.178455	6	0.0728541		IntAnterior	0.298289	0.157072	10	0.0496706		0.180137	0.00968775	3	0.00559322		0.348926	0.164332	7	0.0621115
2	m	1	3	22	#DIV/0!		GE2	1	45	9	8	m8	MedPosterior	6	18		Lcrus1	0.522009	0.255794	8	0.0904367		IntPosterior	0.250327	0.224967	36	0.0374945		0.218862	0.177271	21	0.0386836		0.294378	0.279407	15	0.0721427
2	m	1	3	23	0.120727	0.120727	GE2	1	45	9	8	m8	MedPosterior	6	18		Lcrus2	0.342906	0.33481	10	0.105876		MedAnterior	0.19661	0.230819	61	0.0295533		0.21999	0.305784	28	0.0577877		0.176773	0.141835	33	0.0246903
2	m	1	3	24	0.0895716	0.0895716	GE2	1	45	9	7	m7	MedPosterior	6	17		Lpm	0.1716	0.0593642	7	0.0224375		MedPosterior	0.147983	0.109404	80	0.0122318		0.130271	0.0698958	37	0.0114908		0.163224	0.133461	43	0.0203527
2	m	1	3	25	0.111938	0.111938	GE2	1	45	9	6	m6	MedPosterior	6	16		isim	0.304816	0.297904	12	0.0859974
2	m	1	3	26	0.10556	0.10556	GE2	1	45	9	4/5	m4/5	MedAnterior	5	15		icrus1	0.17052	0.0774434	4	0.0387217
2	m	1	3	27	0.132654	0.132654	GE2	1	45	9	4/5	m4/5	MedAnterior	5	15		icrus2	0.128718	0.0474677	6	0.0193786
2	m	1	3	28	0.112954	0.112954	GE2	1	45	9	4/5	m4/5	MedAnterior	5	15		ipm	0.213151	0.149712	9	0.0499039
2	m	1	3	29	#DIV/0!		GE2	1	45	9	4/5	m4/5	MedAnterior	5	15		icop	0.396246	0.281884	5	0.126062
2	m	1	3	30	0.0650642	0.0650642	GE2	1	45	9	4/5	m4/5	MedAnterior	5	15		i4/5	0.298289	0.157072	10	0.0496706
2	m	1	3	31	0.172242	0.172242	GE2	1	45	9	3	m3	MedAnterior	5	14		m2	0.175712	0.186829	18	0.044036
2	m	1	3	32	0.0999071	0.0999071	GE2	1	45	9	3	m3	MedAnterior	5	14		m3	0.172123	0.106911	22	0.0227934
2	m	1	3	33	0.31816	0.31816	GE2	1	45	9	3	m3	MedAnterior	5	14		m4/5	0.240177	0.339287	21	0.0740385
2	m	1	3	34	0.116357	0.116357	GE2	1	45	9	3	m3	MedAnterior	5	14		m6	0.200416	0.133499	16	0.0333749
2	m	1	3	35	0.095641	0.095641	GE2	1	45	9	2	m2	MedAnterior	5	13		m7	0.121715	0.0794864	8	0.0281027
2	m	1	3	36	0.132368	0.132368	GE2	1	45	9	2	m2	MedAnterior	5	13		m8	0.134827	0.0639487	18	0.0150729
2	m	1	3	37	0.207592	0.207592	GE2	1	45	9	2	m2	MedAnterior	5	13		m9	0.144738	0.095622	21	0.0208664
2	m	1	3	38	0.145213	0.145213	GE2	1	45	9	2	m2	MedAnterior	5	13		m10	0.128933	0.141997	17	0.0344393
2	m	1	4	190412a_1413	0.189702	0.189702	GE2	1	45	2	pm	Lpm	Lateral	2	6
2	m	1	4	2	0.109506	0.109506	GE2	1	45	2	pm	Lpm	Lateral	2	6
2	m	1	4	3	2.70356	2.70356	GE2	1	45	2	crus2	Lcrus2	Lateral	2	5
2	m	1	4	4	1.97096	1.97096	GE2	1	45	2	crus2	Lcrus2	Lateral	2	5
2	m	1	4	5	#DIV/0!		GE2	1	45	2	crus1			#N/A	#N/A
2	m	1	4	6	0.115804	0.115804	GE2	1	45	2	crus1	Lcrus1	Lateral	2	4
2	m	1	4	7	0.706182	0.706182	GE2	1	45	2	crus1	Lcrus1	Lateral	2	4
2	m	1	4	8	0.0775447	0.0775447	GE2	1	45	2	sim	Lsim	Lateral	2	3
2	m	1	4	9	0.0630266	0.0630266	GE2	1	45	6	sim	isim	IntPosterior	4	7
2	m	1	4	10	0.0961292	0.0961292	GE2	1	45	6	sim	isim	IntPosterior	4	7
2	m	1	4	11	0.111406	0.111406	GE2	1	45	6	sim	isim	IntPosterior	4	7
2	m	1	4	12	0.300712	0.300712	GE2	1	45	6	sim	isim	IntPosterior	4	7
2	m	1	4	13	0.168721	0.168721	GE2	1	45	6	crus1	icrus1	IntPosterior	4	8
2	m	1	4	14	0.149207	0.149207	GE2	1	45	6	crus1	icrus1	IntPosterior	4	8
2	m	1	4	15	0.0889649	0.0889649	GE2	1	45	6	crus1	icrus1	IntPosterior	4	8
2	m	1	4	16	0.124272	0.124272	GE2	1	45	6	crus1	icrus1	IntPosterior	4	8
2	m	1	4	17	0.189504	0.189504	GE2	1	45	6	crus2	icrus2	IntPosterior	4	9
2	m	1	4	18	0.0665122	0.0665122	GE2	1	45	9	10	m10	MedPosterior	6	20
2	m	1	4	19	0.057585	0.057585	GE2	1	45	9	10	m10	MedPosterior	6	20		GE4	210 days	N	4									m	N	3			f	N	1
2	m	1	4	20	0.129654	0.129654	GE2	1	45	9	10	m10	MedPosterior	6	20		By Position ID	average	stdev	n	sem		By major regions	average	stdev	n	sem		average	stdev	n	sem		average	stdev	n	sem
2	m	1	4	21	0.0915892	0.0915892	GE2	1	45	9	9	m9	MedPosterior	6	19		Lpfl	0.124017	0.0397758	3	0.0229646		Vestibular	0.401159	0.691857	9	0.230619		0.401159	0.691857	9	0.230619		#DIV/0!	#DIV/0!	0	#DIV/0!
2	m	1	4	22	0.220783	0.220783	GE2	1	45	9	9	m9	MedPosterior	6	19		Lfl	0.539731	0.834329	6	0.340613		Lateral	0.422327	0.555213	18	0.130865		0.430565	0.588409	16	0.147102		0.356419	0.193107	2	0.136547
2	m	1	4	23	0.0854335	0.0854335	GE2	1	45	9	9	m9	MedPosterior	6	19		Lsim	0.873088	0.958132	5	0.42849		IntAnterior	0.321128	0.192483	3	0.11113		0.321128	0.192483	3	0.11113		#DIV/0!	#DIV/0!	0	#DIV/0!
2	m	1	4	24	0.0957721	0.0957721	GE2	1	45	9	9	m9	MedPosterior	6	19		Lcrus1	0.271278	0.0855798	4	0.0427899		IntPosterior	0.177951	0.0908604	18	0.021416		0.178773	0.0994641	15	0.0256815		0.173842	0.0298413	3	0.0172289
2	m	1	4	25	0.245882	0.245882	GE2	1	45	9	8	m8	MedPosterior	6	18		Lcrus2	0.229743	0.156307	5	0.0699028		MedAnterior	0.117392	0.0459338	31	0.00824995		0.118831	0.0476292	22	0.0101546		0.113876	0.0440188	9	0.0146729
2	m	1	4	26	0.0811851	0.0811851	GE2	1	45	9	8	m8	MedPosterior	6	18		Lpm	0.250654	0.112771	4	0.0563856		MedPosterior	0.118683	0.0540292	33	0.00940528		0.114105	0.0573761	25	0.0114752		0.13299	0.0418216	8	0.0147862
2	m	1	4	27	0.0592247	0.0592247	GE2	1	45	9	8	m8	MedPosterior	6	18		isim	0.203234	0.118377	5	0.0529398
2	m	1	4	28	0.0938836	0.0938836	GE2	1	45	9	7	m7	MedPosterior	6	17		icrus1	0.219851	0.118007	4	0.0590033
2	m	1	4	29	0.0756609	0.0756609	GE2	1	45	9	7	m7	MedPosterior	6	17		icrus2	0.151529	0.066872	4	0.033436
2	m	1	4	30	0.217952	0.217952	GE2	1	45	9	6	m6	MedPosterior	6	16		ipm	0.173074	0.011418	2	0.00807373
2	m	1	4	31	0.101381	0.101381	GE2	1	45	9	6	m6	MedPosterior	6	16		icop	0.118425	0.0513895	3	0.0296697
2	m	1	4	32	0.33881	0.33881	GE2	1	45	9	6	m6	MedPosterior	6	16		i4/5	0.321128	0.192483	3	0.11113
2	m	1	4	33	0.074897	0.074897	GE2	1	45	9	4/5	m4/5	MedAnterior	5	15		m2	0.114043	0.0461882	9	0.0153961
2	m	1	4	34	0.0992182	0.0992182	GE2	1	45	9	4/5	m4/5	MedAnterior	5	15		m3	0.11535	0.0552407	11	0.0166557
2	m	1	4	35	0.138422	0.138422	GE2	1	45	9	4/5	m4/5	MedAnterior	5	15		m4/5	0.122175	0.0391367	11	0.0118002
2	m	1	4	36	0.180135	0.180135	GE2	1	45	9	4/5	m4/5	MedAnterior	5	15		m6	0.0990581	0.0334962	6	0.0136748
2	m	1	4	37	0.163779	0.163779	GE2	1	45	9	4/5	m4/5	MedAnterior	5	15		m7	0.0826473	0.0409051	2	0.0289243
2	m	1	4	38	0.100787	0.100787	GE2	1	45	9	4/5	m4/5	MedAnterior	5	15		m8	0.152328	0.0470345	7	0.0177774
2	m	1	4	39	0.0962038	0.0962038	GE2	1	45	9	4/5	m4/5	MedAnterior	5	15		m9	0.106825	0.0573705	10	0.0181421
2	m	1	4	40	0.0969091	0.0969091	GE2	1	45	9	3	m3	MedAnterior	5	14		m10	0.127795	0.0636191	8	0.0224927
2	m	1	4	41	0.11484	0.11484	GE2	1	45	9	3	m3	MedAnterior	5	14
2	m	1	4	42	0.0935496	0.0935496	GE2	1	45	9	3	m3	MedAnterior	5	14
2	m	1	4	43	0.0692381	0.0692381	GE2	1	45	9	3	m3	MedAnterior	5	14
2	m	1	4	44	0.344393	0.344393	GE2	1	45	9	2	m2	MedAnterior	5	13
2	m	1	4	45	0.0834834	0.0834834	GE2	1	45	9	2	m2	MedAnterior	5	13
2	m	1	5	190611b_1727	0.150504	0.150504	GE2	1	45	2	sim	Lsim	Lateral	2	3
2	m	1	5	2	0.355594	0.355594	GE2	1	45	2	crus1	Lcrus1	Lateral	2	4
2	m	1	5	3	0.235845	0.235845	GE2	1	45	2	crus1	Lcrus1	Lateral	2	4
2	m	1	5	4	0.191785	0.191785	GE2	1	45	2	crus1	Lcrus1	Lateral	2	4
2	m	1	5	5	0.614649	0.614649	GE2	1	45	2	crus2	Lcrus2	Lateral	2	5
2	m	1	5	6	0.236572	0.236572	GE2	1	45	2	crus2	Lcrus2	Lateral	2	5
2	m	1	5	7	0.334324	0.334324	GE2	1	45	2	pfl	Lpfl	Vestibular	1	1
2	m	1	5	8	0.102697	0.102697	GE2	1	45	2	pfl	Lpfl	Vestibular	1	1
2	m	1	5	9	0.0641292	0.0641292	GE2	1	45	6	4/5	i4/5	IntAnterior	3	12
2	m	1	5	10	0.080489	0.080489	GE2	1	45	6	sim	isim	IntPosterior	4	7
2	m	1	5	11	0.15109	0.15109	GE2	1	45	6	sim	isim	IntPosterior	4	7
2	m	1	5	12	0.355672	0.355672	GE2	1	45	6	sim	isim	IntPosterior	4	7
2	m	1	5	13	0.40808	0.40808	GE2	1	45	6	crus2	icrus2	IntPosterior	4	9
2	m	1	5	14	0.15971	0.15971	GE2	1	45	6	cop	icop	IntPosterior	4	11
2	m	1	5	15	0.118563	0.118563	GE2	1	45	10	10	m10	MedPosterior	6	20		GE1	400 days	N	3									m	N	2			f	N	1
2	m	1	5	16	0.0802167	0.0802167	GE2	1	45	10	10	m10	MedPosterior	6	20		By Position ID	average	stdev	n	sem		By major regions	average	stdev	n	sem		average	stdev	n	sem		average	stdev	n	sem
2	m	1	5	17	0.0623638	0.0623638	GE2	1	45	10	9	m9	MedPosterior	6	19		Lpfl	0.166815	0.116809	4	0.0584047		Vestibular	0.234789	0.204428	6	0.0834576		0.160149	0.102252	5	0.0457285		0.607988	#DIV/0!	1	#DIV/0!
2	m	1	5	18	0.156622	0.156622	GE2	1	45	10	9	m9	MedPosterior	6	19		Lfl	0.370737	0.335524	2	0.237251		Lateral	0.463037	0.441949	11	0.133253		0.26345	0.223784	7	0.0845824		0.812315	0.543412	4	0.271706
2	m	1	5	19	0.120264	0.120264	GE2	1	45	10	9	m9	MedPosterior	6	19		Lsim	#DIV/0!	#DIV/0!	0	#DIV/0!		IntAnterior	0.148125	0.117302	2	0.0829452		0.148125	0.117302	2	0.0829452		#DIV/0!	#DIV/0!	0	#DIV/0!
2	m	1	5	20	0.140859	0.140859	GE2	1	45	10	8	m8	MedPosterior	6	18		Lcrus1	0.532709	0.432006	5	0.193199		IntPosterior	0.170763	0.100711	13	0.0279323		0.130006	0.0624808	10	0.0197582		0.306617	0.0854356	3	0.0493263
2	m	1	5	21	0.0924837	0.0924837	GE2	1	45	10	8	m8	MedPosterior	6	18		Lcrus2	0.462231	0.59464	4	0.29732		MedAnterior	0.109497	0.0772186	24	0.0157622		0.0950061	0.0704425	17	0.0170848		0.144691	0.0870902	7	0.032917
2	m	1	5	22	0.0720672	0.0720672	GE2	1	45	10	7	m7	MedPosterior	6	17		Lpm	0.29047	0.249098	2	0.176139		MedPosterior	0.21288	0.343121	23	0.0715457		0.219404	0.39372	17	0.0954912		0.194395	0.146343	6	0.0597442
2	m	1	5	23	0.200005	0.200005	GE2	1	45	10	6	m6	MedPosterior	6	16		isim	0.161435	0.128161	4	0.0640806
2	m	1	5	24	0.156291	0.156291	GE2	1	45	10	6	m6	MedPosterior	6	16		icrus1	0.191262	0.124048	4	0.0620238
2	m	1	5	25	0.132348	0.132348	GE2	1	45	10	4/5	m4/5	MedAnterior	5	15		icrus2	0.0757241	#DIV/0!	1	#DIV/0!
2	m	1	5	26	0.146623	0.146623	GE2	1	45	10	4/5	m4/5	MedAnterior	5	15		ipm	0.14494	#DIV/0!	1	#DIV/0!
2	m	1	5	27	0.112823	0.112823	GE2	1	45	10	4/5	m4/5	MedAnterior	5	15		icop	0.196154	0.0794101	3	0.0458474
2	m	1	5	28	0.100732	0.100732	GE2	1	45	10	3	m3	MedAnterior	5	14		i4/5	0.148125	0.117302	2	0.0829452
2	m	1	5	29	0.0772896	0.0772896	GE2	1	45	10	3	m3	MedAnterior	5	14		m2	0.088558	0.0233955	7	0.00884267
2	m	1	5	30	0.0933553	0.0933553	GE2	1	45	10	3	m3	MedAnterior	5	14		m3	0.137451	0.114451	9	0.0381504
2	m	1	5	31	0.0933553	0.0933553	GE2	1	45	10	3	m3	MedAnterior	5	14		m4/5	0.0963721	0.0501224	8	0.017721
2	m	1	5	32	0.0707199	0.0707199	GE2	1	45	10	10	m10	MedPosterior	6	20		m6	0.146435	0.159582	6	0.0651491
2	m	1	6	190612a_1729	0.329171	0.329171	GE2	1	45	3	crus1	Lcrus1	Lateral	2	4		m7	0.120926	#DIV/0!	1	#DIV/0!
2	m	1	6	2	0.335607	0.335607	GE2	1	45	3	crus2	Lcrus2	Lateral	2	5		m8	0.182973	0.109739	4	0.0548695
2	m	1	6	3	0.205148	0.205148	GE2	1	45	3	pm	Lpm	Lateral	2	6		m9	0.332492	0.613523	7	0.23189
2	m	1	6	4	0.109428	0.109428	GE2	1	45	7	cop	icop	IntPosterior	4	11		m10	0.167473	0.0692835	5	0.0309845
2	m	1	6	5	0.158756	0.158756	GE2	1	45	7	pm	ipm	IntPosterior	4	10
2	m	1	6	6	0.0986441	0.0986441	GE2	1	45	7	pm	ipm	IntPosterior	4	10
2	m	1	6	7	0.152834	0.152834	GE2	1	45	7	crus2	icrus2	IntPosterior	4	9
2	m	1	6	8	0.10717	0.10717	GE2	1	45	7	crus1	icrus1	IntPosterior	4	8
2	m	1	6	9	0.0977799	0.0977799	GE2	1	45	7	crus1	icrus1	IntPosterior	4	8
2	m	1	6	10	0.347632	0.347632	GE2	1	45	7	sim	isim	IntPosterior	4	7
2	m	1	6	11	0.187211	0.187211	GE2	1	45	7	sim	isim	IntPosterior	4	7
2	m	1	6	12	0.263119	0.263119	GE2	1	45	7	4/5	i4/5	IntAnterior	3	12
2	m	1	6	13	0.12533	0.12533	GE2	1	45	11	10	m10	MedPosterior	6	20
2	m	1	6	14	0.331039	0.331039	GE2	1	45	11	10	m10	MedPosterior	6	20
2	m	1	6	15	#DIV/0!		GE2	1	45
2	m	1	6	16	#DIV/0!		GE2	1	45
2	m	1	6	17	0.0894302	0.0894302	GE2	1	45	11	9	m9	MedPosterior	6	19
2	m	1	6	18	0.242167	0.242167	GE2	1	45	11	9	m9	MedPosterior	6	19
2	m	1	6	19	0.211721	0.211721	GE2	1	45	11	8	m8	MedPosterior	6	18
2	m	1	6	20	0.126635	0.126635	GE2	1	45	11	8	m8	MedPosterior	6	18
2	m	1	6	21	0.192919	0.192919	GE2	1	45	11	7	m7	MedPosterior	6	17
2	m	1	6	22	0.10283	0.10283	GE2	1	45	11	6	m6	MedPosterior	6	16
2	m	1	6	23	0.115127	0.115127	GE2	1	45	11	6	m6	MedPosterior	6	16
2	m	1	6	24	0.0908718	0.0908718	GE2	1	45	11	4/5	m4/5	MedAnterior	5	15
2	m	1	6	25	0.0723879	0.0723879	GE2	1	45	11	4/5	m4/5	MedAnterior	5	15
2	m	1	6	26	0.219636	0.219636	GE2	1	45	11	4/5	m4/5	MedAnterior	5	15
2	m	1	6	27	0.100634	0.100634	GE2	1	45	11	3	m3	MedAnterior	5	14
2	m	1	6	28	0.175293	0.175293	GE2	1	45	11	2	m2	MedAnterior	5	13
2	m	1	6	29	0.0669563	0.0669563	GE2	1	45	11	2	m2	MedAnterior	5	13
2	f	0	7	190612c_1710	0.325856	0.325856	GE2	1	45	3	sim	Lsim	Lateral	2	3
2	f	0	7	2	0.380894	0.380894	GE2	1	45	3	sim	Lsim	Lateral	2	3
2	f	0	7	3	#DIV/0!		GE2	1	45	3	sim			#N/A	#N/A
2	f	0	7	4	0.16936	0.16936	GE2	1	45	3	crus1	Lcrus1	Lateral	2	4
2	f	0	7	5	0.42244	0.42244	GE2	1	45	6	4/5	i4/5	IntAnterior	3	12
2	f	0	7	6	0.207453	0.207453	GE2	1	45	6	sim	isim	IntPosterior	4	7
2	f	0	7	7	0.193321	0.193321	GE2	1	45	6	sim	isim	IntPosterior	4	7
2	f	0	7	8	0.104669	0.104669	GE2	1	45	6	sim	isim	IntPosterior	4	7
2	f	0	7	9	#DIV/0!		GE2	1	45					#N/A	#N/A
2	f	0	7	10	0.117456	0.117456	GE2	1	45	10	10	m10	MedPosterior	6	20
2	f	0	7	11	0.0465468	0.0465468	GE2	1	45	10	10	m10	MedPosterior	6	20
2	f	0	7	12	0.134832	0.134832	GE2	1	45	10	9	m9	MedPosterior	6	19
2	f	0	7	13	0.224282	0.224282	GE2	1	45	10	8	m8	MedPosterior	6	18
2	f	0	7	14	0.152387	0.152387	GE2	1	45	10	6	m6	MedPosterior	6	16
2	f	0	7	15	#DIV/0!		GE2	1	45	10	6			#N/A	#N/A
2	f	0	7	16	0.24916	0.24916	GE2	1	45	10	6	m6	MedPosterior	6	16
2	f	0	7	17	0.181037	0.181037	GE2	1	45	10	6	m6	MedPosterior	6	16
2	f	0	7	18	0.398419	0.398419	GE2	1	45	10	6	m6	MedPosterior	6	16
2	f	0	7	19	0.229218	0.229218	GE2	1	45	10	4/5	m4/5	MedAnterior	5	15
2	f	0	7	20	0.117704	0.117704	GE2	1	45	10	4/5	m4/5	MedAnterior	5	15
2	f	0	7	21	0.214464	0.214464	GE2	1	45	10	4/5	m4/5	MedAnterior	5	15
2	f	0	7	22	0.215134	0.215134	GE2	1	45	10	4/5	m4/5	MedAnterior	5	15
2	f	0	7	23	0.711172	0.711172	GE2	1	45	10	3	m3	MedAnterior	5	14
2	f	0	7	24	0.12702	0.12702	GE2	1	45	10	3	m3	MedAnterior	5	14
2	f	0	7	25	0.124658	0.124658	GE2	1	45	10	3	m3	MedAnterior	5	14
2	f	0	7	26	0.0695348	0.0695348	GE2	1	45	10	2	m2	MedAnterior	5	13
2	f	0	22	200225_2580	0.148675	0.148675	GE2	1	45	3	PFl	LPFl	Vestibular	1	1
2	f	0	22		0.351004	0.351004	GE2	1	45	3	PFl	LPFl	Vestibular	1	1
2	f	0	22		0.247902	0.247902	GE2	1	45	3	Crus1	LCrus1	Lateral	2	4
2	f	0	22		1.31524	1.31524	GE2	1	45	3	Crus1	LCrus1	Lateral	2	4
2	f	0	22		0.249412	0.249412	GE2	1	45	3	Crus2	LCrus2	Lateral	2	5
2	f	0	22		0.149789	0.149789	GE2	1	45	3	Crus2	LCrus2	Lateral	2	5
2	f	0	22		0.224885	0.224885	GE2	1	45	7	sim	isim	IntPosterior	4	7
2	f	0	22		0.448784	0.448784	GE2	1	45	7	Crus2	iCrus2	IntPosterior	4	9
2	f	0	22		0.151192	0.151192	GE2	1	45	7	Crus1	iCrus1	IntPosterior	4	8
2	f	0	22		0.12746	0.12746	GE2	1	45	7	PM	iPM	IntPosterior	4	10
2	f	0	22		0.10707	0.10707	GE2	1	45	12	2	m2	MedAnterior	5	13
2	f	0	22		0.193117	0.193117	GE2	1	45	12	2	m2	MedAnterior	5	13
2	f	0	22		#DIV/0!		GE2	1	45	12				#N/A	#N/A
2	f	0	22		0.0726296	0.0726296	GE2	1	45	12	3	m3	MedAnterior	5	14
2	f	0	22		0.240553	0.240553	GE2	1	45	12	3	m3	MedAnterior	5	14
2	f	0	22		0.098502	0.098502	GE2	1	45	12	4/5	m4/5	MedAnterior	5	15
2	f	0	22		0.122794	0.122794	GE2	1	45	12	4/5	m4/5	MedAnterior	5	15
2	f	0	22		0.0951922	0.0951922	GE2	1	45	12	4/5	m4/5	MedAnterior	5	15
2	f	0	22		0.141876	0.141876	GE2	1	45	12	6	m6	MedPosterior	6	16
2	f	0	22		0.06223	0.06223	GE2	1	45	12	6	m6	MedPosterior	6	16
2	f	0	22		0.0590398	0.0590398	GE2	1	45	12	7	m7	MedPosterior	6	17
2	f	0	22		0.119032	0.119032	GE2	1	45	12	7	m7	MedPosterior	6	17
2	f	0	22		0.162774	0.162774	GE2	1	45	12	8	m8	MedPosterior	6	18
2	f	0	22		0.147323	0.147323	GE2	1	45	12	8	m8	MedPosterior	6	18
2	f	0	22		0.148915	0.148915	GE2	1	45	12	9	m9	MedPosterior	6	19
2	f	0	22		0.0849555	0.0849555	GE2	1	45	12	9	m9	MedPosterior	6	19
2	f	0	22		0.0535406	0.0535406	GE2	1	45	12	9	m9	MedPosterior	6	19
2	f	0	22		0.0495476	0.0495476	GE2	1	45	12	10	m10	MedPosterior	6	20
2	f	0	22		0.118625	0.118625	GE2	1	45	12	10	m10	MedPosterior	6	20
2	f	0	8	190725b_1574	0.141654	0.141654	GE3	2	120	3	pfl	Lpfl	Vestibular	1	1
2	f	0	8	2	0.269499	0.269499	GE3	2	120	3	pfl	Lpfl	Vestibular	1	1
2	f	0	8	3	0.260678	0.260678	GE3	2	120	3	crus1	Lcrus1	Lateral	2	4
2	f	0	8	4	0.476154	0.476154	GE3	2	120	3	crus2	Lcrus2	Lateral	2	5
2	f	0	8	5	0.145206	0.145206	GE3	2	120	3	pm	Lpm	Lateral	2	6
2	f	0	8	6	0.054189	0.054189	GE3	2	120	7	crus2	icrus2	IntPosterior	4	9
2	f	0	8	7	0.222134	0.222134	GE3	2	120	7	sim	isim	IntPosterior	4	7
2	f	0	8	8	0.20065	0.20065	GE3	2	120	7	sim	isim	IntPosterior	4	7
2	f	0	8	9	0.52667	0.52667	GE3	2	120	7	4/5	i4/5	IntAnterior	3	12
2	f	0	8	10	0.217168	0.217168	GE3	2	120	7	4/5	i4/5	IntAnterior	3	12
2	f	0	8	11	0.56187	0.56187	GE3	2	120	7	4/5	i4/5	IntAnterior	3	12
2	f	0	8	12	0.0349997	0.0349997	GE3	2	120	10	2	m2	MedAnterior	5	13
2	f	0	8	13	0.04148	0.04148	GE3	2	120	10	2	m2	MedAnterior	5	13
2	f	0	8	14	0.247902	0.247902	GE3	2	120	10	3	m3	MedAnterior	5	14
2	f	0	8	15	0.159194	0.159194	GE3	2	120	10	3	m3	MedAnterior	5	14
2	f	0	8	16	0.184586	0.184586	GE3	2	120	10	3	m3	MedAnterior	5	14
2	f	0	8	17	0.195638	0.195638	GE3	2	120	10	4/5	m4/5	MedAnterior	5	15
2	f	0	8	18	0.285775	0.285775	GE3	2	120	10	4/5	m4/5	MedAnterior	5	15
2	f	0	8	19	0.172373	0.172373	GE3	2	120	10	4/5	m4/5	MedAnterior	5	15
2	f	0	8	20	0.314502	0.314502	GE3	2	120	10	4/5	m4/5	MedAnterior	5	15
2	f	0	8	21	0.268034	0.268034	GE3	2	120	10	6	m6	MedPosterior	6	16
2	f	0	8	22	0.0771296	0.0771296	GE3	2	120	10	6	m6	MedPosterior	6	16
2	f	0	8	23	0.310341	0.310341	GE3	2	120	10	7	m7	MedPosterior	6	17
2	f	0	8	24	0.18828	0.18828	GE3	2	120	10	8	m8	MedPosterior	6	18
2	f	0	8	25	0.0976776	0.0976776	GE3	2	120	10	8	m8	MedPosterior	6	18
2	f	0	8	26	0.0652857	0.0652857	GE3	2	120	10	8	m8	MedPosterior	6	18
2	f	0	8	27	0.149795	0.149795	GE3	2	120	10	9	m9	MedPosterior	6	19
2	f	0	8	28	0.0594153	0.0594153	GE3	2	120	10	9	m9	MedPosterior	6	19
2	f	0	8	29	0.0245931	0.0245931	GE3	2	120	10	9	m9	MedPosterior	6	19
2	f	0	8	30	0.2228	0.2228	GE3	2	120	10	10	m10	MedPosterior	6	20
2	f	0	8	31	0.361181	0.361181	GE3	2	120	10	10	m10	MedPosterior	6	20
2	f	0	8	32	0.0281021	0.0281021	GE3	2	120	10	10	m10	MedPosterior	6	20
2	m	1	9	190812a_1657	0.840418	0.840418	GE3	2	120	2	crus1	Lcrus1	Lateral	2	4
2	m	1	9	2	0.200519	0.200519	GE3	2	120	6	sim	isim	IntPosterior	4	7
2	m	1	9	3	0.140641	0.140641	GE3	2	120	6	crus2	icrus2	IntPosterior	4	9
2	m	1	9	4	0.191502	0.191502	GE3	2	120	6	pm	ipm	IntPosterior	4	10
2	m	1	9	5	0.0981	0.0981	GE3	2	120	6	pm	ipm	IntPosterior	4	10
2	m	1	9	6	0.145232	0.145232	GE3	2	120	6	cop	icop	IntPosterior	4	11
2	m	1	9	7	0.114798	0.114798	GE3	2	120	11	2	m2	MedAnterior	5	13
2	m	1	9	8	0.258663	0.258663	GE3	2	120	11	2	m2	MedAnterior	5	13
2	m	1	9	9	0.21743	0.21743	GE3	2	120	11	3	m3	MedAnterior	5	14
2	m	1	9	10	0.140828	0.140828	GE3	2	120	11	3	m3	MedAnterior	5	14
2	m	1	9	11	0.476394	0.476394	GE3	2	120	11	3	m3	MedAnterior	5	14
2	m	1	9	12	0.245978	0.245978	GE3	2	120	11	4/5	m4/5	MedAnterior	5	15
2	m	1	9	13	0.119251	0.119251	GE3	2	120	11	4/5	m4/5	MedAnterior	5	15
2	m	1	9	14	0.121368	0.121368	GE3	2	120	11	4/5	m4/5	MedAnterior	5	15
2	m	1	9	15	0.249215	0.249215	GE3	2	120	11	6	m6	MedPosterior	6	16
2	m	1	9	16	0.0732188	0.0732188	GE3	2	120	11	7	m7	MedPosterior	6	17
2	m	1	9	17	0.0896749	0.0896749	GE3	2	120	11	8	m8	MedPosterior	6	18
2	m	1	9	18	0.304678	0.304678	GE3	2	120	11	8	m8	MedPosterior	6	18
2	m	1	9	19	0.0795907	0.0795907	GE3	2	120	11	9	m9	MedPosterior	6	19
2	m	1	9	20	0.165113	0.165113	GE3	2	120	11	9	m9	MedPosterior	6	19
2	m	1	9	21	0.0824192	0.0824192	GE3	2	120	11	10	m10	MedPosterior	6	20
2	f	0	10	190823a_1670	0.559395	0.559395	GE3	2	120	3	crus1	Lcrus1	Lateral	2	4
2	f	0	10		0.152209	0.152209	GE3	2	120	3	crus2	Lcrus2	Lateral	2	5
2	f	0	10		0.161163	0.161163	GE3	2	120	3	pfl	Lpfl	Vestibular	1	1
2	f	0	10		0.236231	0.236231	GE3	2	120	6	4/5	i4/5	IntAnterior	3	12
2	f	0	10		0.176689	0.176689	GE3	2	120	6	sim	isim	IntPosterior	4	7
2	f	0	10		0.144643	0.144643	GE3	2	120	6	crus2	icrus2	IntPosterior	4	9
2	f	0	10		0.842331	0.842331	GE3	2	120	6	cop	icop	IntPosterior	4	11
2	f	0	10		0.194743	0.194743	GE3	2	120	6	cop	icop	IntPosterior	4	11
2	f	0	10		0.082612	0.082612	GE3	2	120	11	2	m2	MedAnterior	5	13
2	f	0	10		0.110324	0.110324	GE3	2	120	11	2	m2	MedAnterior	5	13
2	f	0	10		0.18534	0.18534	GE3	2	120	11	3	m3	MedAnterior	5	14
2	f	0	10		0.405509	0.405509	GE3	2	120	11	3	m3	MedAnterior	5	14
2	f	0	10		0.185497	0.185497	GE3	2	120	11	3	m3	MedAnterior	5	14
2	f	0	10		0.155569	0.155569	GE3	2	120	11	4/5	m4/5	MedAnterior	5	15
2	f	0	10		0.0739542	0.0739542	GE3	2	120	11	4/5	m4/5	MedAnterior	5	15
2	f	0	10		0.146524	0.146524	GE3	2	120	11	4/5	m4/5	MedAnterior	5	15
2	f	0	10		0.619465	0.619465	GE3	2	120	11	6	m6	MedPosterior	6	16
2	f	0	10		0.138355	0.138355	GE3	2	120	11	6	m6	MedPosterior	6	16
2	f	0	10		0.111194	0.111194	GE3	2	120	11	7	m7	MedPosterior	6	17
2	f	0	10		0.165877	0.165877	GE3	2	120	11	8	m8	MedPosterior	6	18
2	f	0	10		0.136951	0.136951	GE3	2	120	11	8	m8	MedPosterior	6	18
2	f	0	10		0.421567	0.421567	GE3	2	120	11	9	m9	MedPosterior	6	19
2	f	0	10		0.0642572	0.0642572	GE3	2	120	11	9	m9	MedPosterior	6	19
2	f	0	10		0.107142	0.107142	GE3	2	120	11	9	m9	MedPosterior	6	19
2	f	0	10		0.106277	0.106277	GE3	2	120	11	10	m10	MedPosterior	6	20
2	f	0	10		0.0856485	0.0856485	GE3	2	120	11	10	m10	MedPosterior	6	20
2	f	0	11	190823b_1671	0.0912547	0.0912547	GE3	2	120	3	crus2	Lcrus2	Lateral	2	5
2	f	0	11		0.23121	0.23121	GE3	2	120	3	pm	Lpm	Lateral	2	6
2	f	0	11		0.59949	0.59949	GE3	2	120	3	cop	Lcop	lateral	2	#N/A
2	f	0	11		0.123309	0.123309	GE3	2	120	7	pm	ipm	IntPosterior	4	10
2	f	0	11		#DIV/0!		GE3	2	120	7	crus2	icrus2	IntPosterior	4	9
2	f	0	11		0.115772	0.115772	GE3	2	120	7	sim	isim	IntPosterior	4	7
2	f	0	11		0.310904	0.310904	GE3	2	120	7	4/5	i4/5	IntAnterior	3	12
2	f	0	11		#DIV/0!		GE3	2	120	7	4/5			#N/A	#N/A
2	f	0	11		0.449301	0.449301	GE3	2	120	7	4/5	i4/5	IntAnterior	3	12
2	f	0	11		0.0772274	0.0772274	GE3	2	120	11	10	m10	MedPosterior	6	20
2	f	0	11		0.0468593	0.0468593	GE3	2	120	11	10	m10	MedPosterior	6	20
2	f	0	11		0.0746078	0.0746078	GE3	2	120	11	9	m9	MedPosterior	6	19
2	f	0	11		0.190244	0.190244	GE3	2	120	11	9	m9	MedPosterior	6	19
2	f	0	11		0.301438	0.301438	GE3	2	120	11	9	m9	MedPosterior	6	19
2	f	0	11		0.141009	0.141009	GE3	2	120	11	8	m8	MedPosterior	6	18
2	f	0	11		0.119859	0.119859	GE3	2	120	11	8	m8	MedPosterior	6	18
2	f	0	11		0.115067	0.115067	GE3	2	120	11	7	m7	MedPosterior	6	17
2	f	0	11		0.098733	0.098733	GE3	2	120	11	6	m6	MedPosterior	6	16
2	f	0	11		0.179833	0.179833	GE3	2	120	11	6	m6	MedPosterior	6	16
2	f	0	11		0.523099	0.523099	GE3	2	120	11	4/5	m4/5	MedAnterior	5	15
2	f	0	11		0.19486	0.19486	GE3	2	120	11	4/5	m4/5	MedAnterior	5	15
2	f	0	11		#DIV/0!		GE3	2	120	11	3			#N/A	#N/A
2	f	0	11		0.0968173	0.0968173	GE3	2	120	11	3	m3	MedAnterior	5	14
2	f	0	11		0.0902166	0.0902166	GE3	2	120	11	3	m3	MedAnterior	5	14
2	f	0	11		0.092461	0.092461	GE3	2	120	11	2	m2	MedAnterior	5	13
2	f	0	11		0.170361	0.170361	GE3	2	120	11	2	m2	MedAnterior	5	13
2	f	0	11		0.686666	0.686666	GE3	2	120	11	2	m2	MedAnterior	5	13
2	f	0	11		0.305133	0.305133	GE3	2	120	11	2	m2	MedAnterior	5	13
2	f	0	12	190826a_1695	0.59702	0.59702	GE3	2	120	3	sim	Lsim	Lateral	2	3
2	f	0	12	2	0.573738	0.573738	GE3	2	120	3	crus1	Lcrus1	Lateral	2	4
2	f	0	12	3	0.589149	0.589149	GE3	2	120	3	crus1	Lcrus1	Lateral	2	4
2	f	0	12	4	0.200277	0.200277	GE3	2	120	3	crus2	Lcrus2	Lateral	2	5
2	f	0	12	5	0.216283	0.216283	GE3	2	120	3	crus2	Lcrus2	Lateral	2	5
2	f	0	12	6	0.251897	0.251897	GE3	2	120	3	pm	Lpm	Lateral	2	6
2	f	0	12	7	0.140335	0.140335	GE3	2	120	5	4/5	i4/5	IntAnterior	3	12
2	f	0	12	8	0.987036	0.987036	GE3	2	120	5	sim	isim	IntPosterior	4	7
2	f	0	12	9	0.228817	0.228817	GE3	2	120	5	sim	isim	IntPosterior	4	7
2	f	0	12	10	0.128553	0.128553	GE3	2	120	5	crus1	icrus1	IntPosterior	4	8
2	f	0	12	11	0.120734	0.120734	GE3	2	120	5	pm	ipm	IntPosterior	4	10
2	f	0	12	12	0.314236	0.314236	GE3	2	120	5	pm	ipm	IntPosterior	4	10
2	f	0	12	13	0.561828	0.561828	GE3	2	120	5	pm	ipm	IntPosterior	4	10
2	f	0	12	14	#DIV/0!		GE3	2	120	5	cop			#N/A	#N/A
2	f	0	12	15	0.585659	0.585659	GE3	2	120	10	10	m10	MedPosterior	6	20
2	f	0	12	16	0.0828825	0.0828825	GE3	2	120	10	10	m10	MedPosterior	6	20
2	f	0	12	17	0.0654422	0.0654422	GE3	2	120	10	10	m10	MedPosterior	6	20
2	f	0	12	18	0.292194	0.292194	GE3	2	120	10	9	m9	MedPosterior	6	19
2	f	0	12	19	0.089265	0.089265	GE3	2	120	10	9	m9	MedPosterior	6	19
2	f	0	12	20	0.120147	0.120147	GE3	2	120	10	8	m8	MedPosterior	6	18
2	f	0	12	21	0.0861215	0.0861215	GE3	2	120	10	8	m8	MedPosterior	6	18
2	f	0	12	22	0.102296	0.102296	GE3	2	120	10	7	m7	MedPosterior	6	17
2	f	0	12	23	0.138305	0.138305	GE3	2	120	10	6	m6	MedPosterior	6	16
2	f	0	12	24	0.0658686	0.0658686	GE3	2	120	10	6	m6	MedPosterior	6	16
2	f	0	12	25	0.236186	0.236186	GE3	2	120	10	6	m6	MedPosterior	6	16
2	f	0	12	26	0.158425	0.158425	GE3	2	120	10	4/5	m4/5	MedAnterior	5	15
2	f	0	12	27	0.0633214	0.0633214	GE3	2	120	10	4/5	m4/5	MedAnterior	5	15
2	f	0	12	28	0.0672802	0.0672802	GE3	2	120	10	4/5	m4/5	MedAnterior	5	15
2	f	0	12	29	0.0673367	0.0673367	GE3	2	120	10	3	m3	MedAnterior	5	14
2	f	0	12	30	0.108089	0.108089	GE3	2	120	10	3	m3	MedAnterior	5	14
2	f	0	12	31	0.0661045	0.0661045	GE3	2	120	10	3	m3	MedAnterior	5	14
2	f	0	12	32	0.099033	0.099033	GE3	2	120	10	3	m3	MedAnterior	5	14
2	f	0	12	33	0.0625338	0.0625338	GE3	2	120	10	2	m2	MedAnterior	5	13
2	m	1	13	190924a_1830	0.141235	0.141235	GE3	2	120	2	sim	Lsim	Lateral	2	3
2	m	1	13	2	0.148772	0.148772	GE3	2	120	2	sim	Lsim	Lateral	2	3
2	m	1	13	3	0.159951	0.159951	GE3	2	120	2	sim	Lsim	Lateral	2	3
2	m	1	13	4	0.327067	0.327067	GE3	2	120	2	sim	Lsim	Lateral	2	3
2	m	1	13	5	0.868864	0.868864	GE3	2	120	2	crus1	Lcrus1	Lateral	2	4
2	m	1	13	6	0.170839	0.170839	GE3	2	120	2	crus2	Lcrus2	Lateral	2	5
2	m	1	13	7	0.209131	0.209131	GE3	2	120	2	pm	Lpm	Lateral	2	6
2	m	1	13	8	0.150171	0.150171	GE3	2	120	2	pm	Lpm	Lateral	2	6
2	m	1	13	9	0.080633	0.080633	GE3	2	120	2	pfl	Lpfl	Vestibular	1	1
2	m	1	13	10	0.181649	0.181649	GE3	2	120	6	4/5	i4/5	IntAnterior	3	12
2	m	1	13	11	0.169782	0.169782	GE3	2	120	6	4/5	i4/5	IntAnterior	3	12
2	m	1	13	12	0.875801	0.875801	GE3	2	120	6	sim	isim	IntPosterior	4	7
2	m	1	13	13	0.116063	0.116063	GE3	2	120	6	sim	isim	IntPosterior	4	7
2	m	1	13	14	0.075195	0.075195	GE3	2	120	11	2	m2	MedAnterior	5	13
2	m	1	13	15	0.615074	0.615074	GE3	2	120	11	2	m2	MedAnterior	5	13
2	m	1	13	16	0.199711	0.199711	GE3	2	120	11	3	m3	MedAnterior	5	14
2	m	1	13	17	0.298697	0.298697	GE3	2	120	11	3	m3	MedAnterior	5	14
2	m	1	13	18	1.64766	1.64766	GE3	2	120	11	4/5	m4/5	MedAnterior	5	15
2	m	1	13	19	#DIV/0!		GE3	2	120	11	4/5			#N/A	#N/A
2	m	1	13	20	0.316302	0.316302	GE3	2	120	11	6	m6	MedPosterior	6	16
2	m	1	13	21	0.0992922	0.0992922	GE3	2	120	11	6	m6	MedPosterior	6	16
2	m	1	13	22	0.0760666	0.0760666	GE3	2	120	11	7	m7	MedPosterior	6	17
2	m	1	13	23	0.0861314	0.0861314	GE3	2	120	11	8	m8	MedPosterior	6	18
2	m	1	13	24	0.0892379	0.0892379	GE3	2	120	11	9	m9	MedPosterior	6	19
2	m	1	13	25	0.182804	0.182804	GE3	2	120	11	9	m9	MedPosterior	6	19
2	m	1	13	26	0.0633663	0.0633663	GE3	2	120	11	10	m10	MedPosterior	6	20
2	m	1	13	27	0.0638958	0.0638958	GE3	2	120	11	10	m10	MedPosterior	6	20
2	m	1	14	191008_1874	0.116244	0.116244	GE3	2	120	3	pm	Lpm	Lateral	2	6
2	m	1	14	2	0.32554	0.32554	GE3	2	120	3	crus2	Lcrus2	Lateral	2	5
2	m	1	14	3	0.261608	0.261608	GE3	2	120	3	crus2	Lcrus2	Lateral	2	5
2	m	1	14	4	0.206305	0.206305	GE3	2	120	3	crus1	Lcrus1	Lateral	2	4
2	m	1	14	5	0.357952	0.357952	GE3	2	120	3	sim	Lsim	Lateral	2	3
2	m	1	14	6	0.317144	0.317144	GE3	2	120	3	pfl	Lpfl	Vestibular	1	1
2	m	1	14	7	0.221744	0.221744	GE3	2	120	3	pfl	Lpfl	Vestibular	1	1
2	m	1	14	8	0.0594526	0.0594526	GE3	2	120	3	fl	Lfl	Vestibular	1	2
2	m	1	14	9	0.102996	0.102996	GE3	2	120	3	fl	Lfl	Vestibular	1	2
2	m	1	14	10	0.169111	0.169111	GE3	2	120	6	pm	ipm	IntPosterior	4	10
2	m	1	14	11	0.245575	0.245575	GE3	2	120	6	pm	ipm	IntPosterior	4	10
2	m	1	14	12	0.184649	0.184649	GE3	2	120	6	crus2	icrus2	IntPosterior	4	9
2	m	1	14	13	0.0913463	0.0913463	GE3	2	120	6	crus2	icrus2	IntPosterior	4	9
2	m	1	14	14	0.1649	0.1649	GE3	2	120	6	crus1	icrus1	IntPosterior	4	8
2	m	1	14	15	0.107518	0.107518	GE3	2	120	6	crus1	icrus1	IntPosterior	4	8
2	m	1	14	16	0.272783	0.272783	GE3	2	120	6	sim	isim	IntPosterior	4	7
2	m	1	14	17	0.108088	0.108088	GE3	2	120	6	sim	isim	IntPosterior	4	7
2	m	1	14	18	0.486668	0.486668	GE3	2	120	6	cop	icop	IntPosterior	4	11
2	m	1	14	19	0.136871	0.136871	GE3	2	120	13	2	m2	MedAnterior	5	13
2	m	1	14	20	0.0498024	0.0498024	GE3	2	120	13	2	m2	MedAnterior	5	13
2	m	1	14	21	0.123813	0.123813	GE3	2	120	13	2	m2	MedAnterior	5	13
2	m	1	14	22	0.117124	0.117124	GE3	2	120	13	3	m3	MedAnterior	5	14
2	m	1	14	23	0.0889154	0.0889154	GE3	2	120	13	3	m3	MedAnterior	5	14
2	m	1	14	24	0.0751182	0.0751182	GE3	2	120	13	4/5	m4/5	MedAnterior	5	15
2	m	1	14	25	0.107972	0.107972	GE3	2	120	13	4/5	m4/5	MedAnterior	5	15
2	m	1	14	26	0.193081	0.193081	GE3	2	120	13	6	m6	MedPosterior	6	16
2	m	1	14	27	0.136354	0.136354	GE3	2	120	13	6	m6	MedPosterior	6	16
2	m	1	14	28	0.124415	0.124415	GE3	2	120	13	7	m7	MedPosterior	6	17
2	m	1	14	29	0.209418	0.209418	GE3	2	120	13	8	m8	MedPosterior	6	18
2	m	1	14	30	0.0790721	0.0790721	GE3	2	120	13	8	m8	MedPosterior	6	18
2	m	1	14	31	0.213026	0.213026	GE3	2	120	13	8	m8	MedPosterior	6	18
2	m	1	14	32	0.0975827	0.0975827	GE3	2	120	13	9	m9	MedPosterior	6	19
2	m	1	14	33	0.168598	0.168598	GE3	2	120	13	8	m8	MedPosterior	6	18
2	m	1	14	34	0.143874	0.143874	GE3	2	120	13	9	m9	MedPosterior	6	19
2	m	1	14	35	0.087266	0.087266	GE3	2	120	13	9	m9	MedPosterior	6	19
2	m	1	14	36	0.0484137	0.0484137	GE3	2	120	13	10	m10	MedPosterior	6	20
2	m	1	14	37	0.115922	0.115922	GE3	2	120	13	10	m10	MedPosterior	6	20
2	m	1	19	200105a_2226	0.082895	0.082895	GE3	2	120	3	Fl	LFl	Vestibular	1	2
2	m	1	19		#DIV/0!		GE3	2	120	3	PFl	LPFl	Vestibular	1	1
2	m	1	19		#DIV/0!		GE3	2	120	3	PFl	LPFl	Vestibular	1	1
2	m	1	19		0.277519	0.277519	GE3	2	120	3	Crus1	LCrus1	Lateral	2	4
2	m	1	19		0.288878	0.288878	GE3	2	120	3	Crus2	LCrus2	Lateral	2	5
2	m	1	19		1.24602	1.24602	GE3	2	120	3	Crus2	LCrus2	Lateral	2	5
2	m	1	19		0.0973372	0.0973372	GE3	2	120	3	PM	LPM	Lateral	2	6
2	m	1	19		0.312257	0.312257	GE3	2	120	6	Cop	iCop	IntPosterior	4	11
2	m	1	19		0.093963	0.093963	GE3	2	120	6	PM	iPM	IntPosterior	4	10
2	m	1	19		0.156837	0.156837	GE3	2	120	6	Crus2	iCrus2	IntPosterior	4	9
2	m	1	19		0.281111	0.281111	GE3	2	120	6	Crus1	iCrus1	IntPosterior	4	8
2	m	1	19		0.153443	0.153443	GE3	2	120	6	Sim	iSim	IntPosterior	4	7
2	m	1	19		0.18898	0.18898	GE3	2	120	6	4/5	i4/5	IntAnterior	3	12
2	m	1	19		0.0946566	0.0946566	GE3	2	120	12	2	m2	MedAnterior	5	13
2	m	1	19		0.107367	0.107367	GE3	2	120	12	2	m2	MedAnterior	5	13
2	m	1	19		0.0790315	0.0790315	GE3	2	120	12	3	m3	MedAnterior	5	14
2	m	1	19		0.164268	0.164268	GE3	2	120	12	3	m3	MedAnterior	5	14
2	m	1	19		0.108671	0.108671	GE3	2	120	12	3	m3	MedAnterior	5	14
2	m	1	19		0.121813	0.121813	GE3	2	120	12	4/5	m4/5	MedAnterior	5	15
2	m	1	19		0.11419	0.11419	GE3	2	120	12	4/5	m4/5	MedAnterior	5	15
2	m	1	19		0.139051	0.139051	GE3	2	120	12	4/5	m4/5	MedAnterior	5	15
2	m	1	19		0.151349	0.151349	GE3	2	120	12	6	m6	MedPosterior	6	16
2	m	1	19		0.239149	0.239149	GE3	2	120	12	6	m6	MedPosterior	6	16
2	m	1	19		0.0611186	0.0611186	GE3	2	120	12	7	m7	MedPosterior	6	17
2	m	1	19		0.0984874	0.0984874	GE3	2	120	12	8	m8	MedPosterior	6	18
2	m	1	19		0.0565923	0.0565923	GE3	2	120	12	8	m8	MedPosterior	6	18
2	m	1	19		0.199426	0.199426	GE3	2	120	12	9	m9	MedPosterior	6	19
2	m	1	19		0.102055	0.102055	GE3	2	120	12	9	m9	MedPosterior	6	19
2	m	1	19		0.118032	0.118032	GE3	2	120	12	9	m9	MedPosterior	6	19
2	m	1	19		0.0606998	0.0606998	GE3	2	120	12	10	m10	MedPosterior	6	20
2	m	1	19		0.0950726	0.0950726	GE3	2	120	12	10	m10	MedPosterior	6	20
2	f	0	15	191122b_1711	#DIV/0!		GE4	3	210	2	crus2			#N/A	#N/A
2	f	0	15	2	0.492967	0.492967	GE4	3	210	2	crus2	Lcrus2	Lateral	2	5
2	f	0	15	3	0.219872	0.219872	GE4	3	210	2	crus2	Lcrus2	Lateral	2	5
2	f	0	15	4	0.195638	0.195638	GE4	3	210	6	crus2	icrus2	IntPosterior	4	9
2	f	0	15	5	#DIV/0!		GE4	3	210	6	crus2			#N/A	#N/A
2	f	0	15	6	0.186057	0.186057	GE4	3	210	6	sim	isim	IntPosterior	4	7
2	f	0	15	7	0.139831	0.139831	GE4	3	210	6	sim	isim	IntPosterior	4	7
2	f	0	15	8	0.088507	0.088507	GE4	3	210	12	10	m10	MedPosterior	6	20
2	f	0	15	9	0.0810201	0.0810201	GE4	3	210	12	10	m10	MedPosterior	6	20
2	f	0	15	10	0.21452	0.21452	GE4	3	210	12	9	m9	MedPosterior	6	19
2	f	0	15	11	0.145372	0.145372	GE4	3	210	12	9	m9	MedPosterior	6	19
2	f	0	15	12	0.132533	0.132533	GE4	3	210	12	9	m9	MedPosterior	6	19
2	f	0	15	13	0.146971	0.146971	GE4	3	210	12	8	m8	MedPosterior	6	18
2	f	0	15	14	#DIV/0!		GE4	3	210	12	8			#N/A	#N/A
2	f	0	15	15	0.111572	0.111572	GE4	3	210	12	7	m7	MedPosterior	6	17
2	f	0	15	16	0.143424	0.143424	GE4	3	210	12	6	m6	MedPosterior	6	16
2	f	0	15	17	0.0985786	0.0985786	GE4	3	210	12	4/5	m4/5	MedAnterior	5	15
2	f	0	15	18	0.0956867	0.0956867	GE4	3	210	12	4/5	m4/5	MedAnterior	5	15
2	f	0	15	19	0.100712	0.100712	GE4	3	210	12	4/5	m4/5	MedAnterior	5	15
2	f	0	15	20	0.101847	0.101847	GE4	3	210	12	3	m3	MedAnterior	5	14
2	f	0	15	21	0.0695726	0.0695726	GE4	3	210	12	3	m3	MedAnterior	5	14
2	f	0	15	22	0.130192	0.130192	GE4	3	210	12	3	m3	MedAnterior	5	14
2	f	0	15	23	0.223727	0.223727	GE4	3	210	12	2	m2	MedAnterior	5	13
2	f	0	15	24	0.107451	0.107451	GE4	3	210	12	2	m2	MedAnterior	5	13
2	f	0	15	25	0.0971153	0.0971153	GE4	3	210	12	2	m2	MedAnterior	5	13
2	m	1	17	191223_1785	0.0786446	0.0786446	GE4	3	210	3	Fl	LFl	Vestibular	1	2
2	m	1	17	2	0.393096	0.393096	GE4	3	210	3	Fl	LFl	Vestibular	1	2
2	m	1	17	3	0.152484	0.152484	GE4	3	210	3	PFl	LPFl	Vestibular	1	1
2	m	1	17	4	0.106083	0.106083	GE4	3	210	3	Sim	LSim	Lateral	2	3
2	m	1	17	5	0.166883	0.166883	GE4	3	210	3	Sim	LSim	Lateral	2	3
2	m	1	17	6	0.171616	0.171616	GE4	3	210	3	Crus1	LCrus1	Lateral	2	4
2	m	1	17	7	0.371682	0.371682	GE4	3	210	3	Crus1	LCrus1	Lateral	2	4
2	m	1	17	8	0.184725	0.184725	GE4	3	210	3	Crus2	LCrus2	Lateral	2	5
2	m	1	17	9	0.0775353	0.0775353	GE4	3	210	3	Crus2	LCrus2	Lateral	2	5
2	m	1	17	10	0.416943	0.416943	GE4	3	210	3	PM	LPM	Lateral	2	6
2	m	1	17	11	0.173702	0.173702	GE4	3	210	3	PM	LPM	Lateral	2	6
2	m	1	17	12	0.436342	0.436342	GE4	3	210	6	4/5	i4/5	IntAnterior	3	12
2	m	1	17	13	0.167384	0.167384	GE4	3	210	6	Sim	iSim	IntPosterior	4	7
2	m	1	17	14	#DIV/0!		GE4	3	210	6				#N/A	#N/A
2	m	1	17	15	0.198521	0.198521	GE4	3	210	6	Crus1	iCrus1	IntPosterior	4	8
2	m	1	17	16	0.234787	0.234787	GE4	3	210	6	crus1	icrus1	IntPosterior	4	8
2	m	1	17	17	0.210221	0.210221	GE4	3	210	6	Crus2	iCrus2	IntPosterior	4	9
2	m	1	17	18	0.175055	0.175055	GE4	3	210	6	cop	icop	IntPosterior	4	11
2	m	1	17	19	0.120812	0.120812	GE4	3	210	12	10	m10	MedPosterior	6	20
2	m	1	17	20	0.175284	0.175284	GE4	3	210	12	10	m10	MedPosterior	6	20
2	m	1	17	21	#DIV/0!		GE4	3	210	12	9			#N/A	#N/A
2	m	1	17	22	0.143275	0.143275	GE4	3	210	12	9	m9	MedPosterior	6	19
2	m	1	17	23	0.0647603	0.0647603	GE4	3	210	12	9	m9	MedPosterior	6	19
2	m	1	17	24	0.116159	0.116159	GE4	3	210	12	8	m8	MedPosterior	6	18
2	m	1	17	25	0.168861	0.168861	GE4	3	210	12	8	m8	MedPosterior	6	18
2	m	1	17	26	0.0530444	0.0530444	GE4	3	210	12	6	m6	MedPosterior	6	16
2	m	1	17	27	0.0747767	0.0747767	GE4	3	210	12	6	m6	MedPosterior	6	16
2	m	1	17	28	0.201444	0.201444	GE4	3	210	12	4/5	m4/5	MedAnterior	5	15
2	m	1	17	29	0.130328	0.130328	GE4	3	210	12	4/5	m4/5	MedAnterior	5	15
2	m	1	17	30	0.1079	0.1079	GE4	3	210	12	3	m3	MedAnterior	5	14
2	m	1	17	31	0.159364	0.159364	GE4	3	210	12	3	m3	MedAnterior	5	14
2	m	1	17	32	0.0980997	0.0980997	GE4	3	210	12	3	m3	MedAnterior	5	14
2	m	1	17	33	0.133499	0.133499	GE4	3	210	12	2	m2	MedAnterior	5	13
2	m	1	17	34	0.0823647	0.0823647	GE4	3	210	12	2	m2	MedAnterior	5	13
2	m	1	20	200129a_2004	0.140997	0.140997	GE4	3	210	3	PFl	LPFl	Vestibular	1	1
2	m	1	20		0.0785688	0.0785688	GE4	3	210	3	PFl	LPFl	Vestibular	1	1
2	m	1	20		2.21321	2.21321	GE4	3	210	3	Fl	LFl	Vestibular	1	2
2	m	1	20		0.395707	0.395707	GE4	3	210	3	Fl	LFl	Vestibular	1	2
2	m	1	20		0.251354	0.251354	GE4	3	210	3	sim	Lsim	Lateral	2	3
2	m	1	20		1.8753	1.8753	GE4	3	210	3	sim	Lsim	Lateral	2	3
2	m	1	20		0.302194	0.302194	GE4	3	210	3	crus1	Lcrus1	Lateral	2	4
2	m	1	20		0.188841	0.188841	GE4	3	210	3	PM	LPM	Lateral	2	6
2	m	1	20		0.098918	0.098918	GE4	3	210	6	4/5	i4/5	IntAnterior	3	12
2	m	1	20		0.409223	0.409223	GE4	3	210	6	sim	isim	IntPosterior	4	7
2	m	1	20		0.0797336	0.0797336	GE4	3	210	6	crus1	icrus1	IntPosterior	4	8
2	m	1	20		0.0631058	0.0631058	GE4	3	210	6	crus2	icrus2	IntPosterior	4	9
2	m	1	20		0.165	0.165	GE4	3	210	6	PM	iPM	IntPosterior	4	10
2	m	1	20		0.0747574	0.0747574	GE4	3	210	6	cop	icop	IntPosterior	4	11
2	m	1	20		0.0596484	0.0596484	GE4	3	210	11	2	m2	MedAnterior	5	13
2	m	1	20		0.117514	0.117514	GE4	3	210	11	2	m2	MedAnterior	5	13
2	m	1	20		0.243615	0.243615	GE4	3	210	11	3	m3	MedAnterior	5	14
2	m	1	20		0.0713109	0.0713109	GE4	3	210	11	3	m3	MedAnterior	5	14
2	m	1	20		0.125549	0.125549	GE4	3	210	11	4/5	m4/5	MedAnterior	5	15
2	m	1	20		0.0767024	0.0767024	GE4	3	210	11	4/5	m4/5	MedAnterior	5	15
2	m	1	20		0.0801886	0.0801886	GE4	3	210	11	4/5	m4/5	MedAnterior	5	15
2	m	1	20		0.118646	0.118646	GE4	3	210	11	6	m6	MedPosterior	6	16
2	m	1	20		0.0859342	0.0859342	GE4	3	210	11	6	m6	MedPosterior	6	16
2	m	1	20		#DIV/0!		GE4	3	210	11	7	m7	MedPosterior	6	17
2	m	1	20		0.238737	0.238737	GE4	3	210	11	8	m8	MedPosterior	6	18
2	m	1	20		0.156294	0.156294	GE4	3	210	11	8	m8	MedPosterior	6	18
2	m	1	20		0.146834	0.146834	GE4	3	210	11	9	m9	MedPosterior	6	19
2	m	1	20		0.0477273	0.0477273	GE4	3	210	11	9	m9	MedPosterior	6	19
2	m	1	20		0.24017	0.24017	GE4	3	210	11	10	m10	MedPosterior	6	20
2	m	1	20		0.178793	0.178793	GE4	3	210	11	10	m10	MedPosterior	6	20				#NAME?
2	m	1	21	200129b_2040	0.0659142	0.0659142	GE4	3	210	3	Fl	LFl	Vestibular	1	2
2	m	1	21		0.0918094	0.0918094	GE4	3	210	3	Fl	LFl	Vestibular	1	2
2	m	1	21		1.96582	1.96582	GE4	3	210	3	Sim	LSim	Lateral	2	3
2	m	1	21		0.239617	0.239617	GE4	3	210	3	crus1	Lcrus1	Lateral	2	4
2	m	1	21		0.173616	0.173616	GE4	3	210	3	crus2	Lcrus2	Lateral	2	5
2	m	1	21		0.223129	0.223129	GE4	3	210	3	PM	LPM	Lateral	2	6
2	m	1	21		0.428123	0.428123	GE4	3	210	6	4/5	i4/5	IntAnterior	3	12
2	m	1	21		0.113674	0.113674	GE4	3	210	6	sim	isim	IntPosterior	4	7
2	m	1	21		0.366363	0.366363	GE4	3	210	6	crus1	icrus1	IntPosterior	4	8
2	m	1	21		0.137154	0.137154	GE4	3	210	6	crus2	icrus2	IntPosterior	4	9
2	m	1	21		0.181147	0.181147	GE4	3	210	6	PM	iPM	IntPosterior	4	10
2	m	1	21		0.105464	0.105464	GE4	3	210	6	cop	icop	IntPosterior	4	11
2	m	1	21		0.0958815	0.0958815	GE4	3	210	11	2	m2	MedAnterior	5	13
2	m	1	21		0.109184	0.109184	GE4	3	210	11	2	m2	MedAnterior	5	13
2	m	1	21		0.157704	0.157704	GE4	3	210	11	3	m3	MedAnterior	5	14
2	m	1	21		0.0786715	0.0786715	GE4	3	210	11	3	m3	MedAnterior	5	14
2	m	1	21		0.0505712	0.0505712	GE4	3	210	11	3	m3	MedAnterior	5	14
2	m	1	21		0.165575	0.165575	GE4	3	210	11	4/5	m4/5	MedAnterior	5	15
2	m	1	21		0.15922	0.15922	GE4	3	210	11	4/5	m4/5	MedAnterior	5	15
2	m	1	21		0.109939	0.109939	GE4	3	210	11	4/5	m4/5	MedAnterior	5	15
2	m	1	21		0.118523	0.118523	GE4	3	210	11	6	m6	MedPosterior	6	16
2	m	1	21		#DIV/0!		GE4	3	210	11	6	m6	MedPosterior	6	16
2	m	1	21		0.053723	0.053723	GE4	3	210	11	7	m7	MedPosterior	6	17
2	m	1	21		0.151604	0.151604	GE4	3	210	11	8	m8	MedPosterior	6	18
2	m	1	21		0.0876722	0.0876722	GE4	3	210	11	8	m8	MedPosterior	6	18
2	m	1	21		0.0537171	0.0537171	GE4	3	210	11	9	m9	MedPosterior	6	19
2	m	1	21		0.0744962	0.0744962	GE4	3	210	11	9	m9	MedPosterior	6	19
2	m	1	21		0.0450144	0.0450144	GE4	3	210	11	9	m9	MedPosterior	6	19
2	m	1	21		0.076844	0.076844	GE4	3	210	11	10	m10	MedPosterior	6	20
2	m	1	21		0.0609273	0.0609273	GE4	3	210	11	10	m10	MedPosterior	6	20
2	f	0	16	191216_952	#DIV/0!		GE1	4	400	3	PFl	LPFl	Vestibular	1	1
2	f	0	16		0.607988	0.607988	GE1	4	400	3	Fl	LFl	Vestibular	1	2
2	f	0	16		0.466609	0.466609	GE1	4	400	3	PM	LPM	Lateral	2	6
2	f	0	16		0.236678	0.236678	GE1	4	400	3	Crus2	LCrus2	Lateral	2	5
2	f	0	16		1.34573	1.34573	GE1	4	400	3	Crus2	LCrus2	Lateral	2	5
2	f	0	16		1.20024	1.20024	GE1	4	400	3	Crus1	LCrus1	Lateral	2	4
2	f	0	16		#DIV/0!		GE1	4	400	6	sim	isim	IntPosterior	4	7
2	f	0	16		0.351393	0.351393	GE1	4	400	6	sim	isim	IntPosterior	4	7
2	f	0	16		0.2081	0.2081	GE1	4	400	6	crus1	icrus1	IntPosterior	4	8
2	f	0	16		0.360358	0.360358	GE1	4	400	6	crus1	icrus1	IntPosterior	4	8
2	f	0	16		0.0882052	0.0882052	GE1	4	400	12	2	m2	MedAnterior	5	13
2	f	0	16		0.124453	0.124453	GE1	4	400	12	2	m2	MedAnterior	5	13
2	f	0	16		0.325439	0.325439	GE1	4	400	12	3	m3	MedAnterior	5	14
2	f	0	16		0.0829733	0.0829733	GE1	4	400	12	3	m3	MedAnterior	5	14
2	f	0	16		0.0772069	0.0772069	GE1	4	400	12	3	m3	MedAnterior	5	14
2	f	0	16		0.140574	0.140574	GE1	4	400	12	4/5	m4/5	MedAnterior	5	15
2	f	0	16		0.173982	0.173982	GE1	4	400	12	4/5	m4/5	MedAnterior	5	15
2	f	0	16		0.466359	0.466359	GE1	4	400	12	6	m6	MedPosterior	6	16
2	f	0	16		#DIV/0!		GE1	4	400	12	8	m8	MedPosterior	6	18
2	f	0	16		0.241664	0.241664	GE1	4	400	12	8	m8	MedPosterior	6	18
2	f	0	16		0.0808335	0.0808335	GE1	4	400	12	9	m9	MedPosterior	6	19
2	f	0	16		0.112781	0.112781	GE1	4	400	12	9	m9	MedPosterior	6	19
2	f	0	16		0.0897627	0.0897627	GE1	4	400	12	10	m10	MedPosterior	6	20
2	f	0	16		0.174967	0.174967	GE1	4	400	12	10	m10	MedPosterior	6	20
2	m	1	18	191229b_989	0.133486	0.133486	GE1	4	400	3	Fl	LFl	Vestibular	1	2
2	m	1	18	2	0.15705	0.15705	GE1	4	400	3	crus1	Lcrus1	Lateral	2	4
2	m	1	18	3	0.621859	0.621859	GE1	4	400	3	crus1	Lcrus1	Lateral	2	4
2	m	1	18	4	#DIV/0!		GE1	4	400	3	crus2	Lcrus2	Lateral	2	5
2	m	1	18	5	0.114331	0.114331	GE1	4	400	3	PM	LPM	Lateral	2	6
2	m	1	18	6	0.264979	0.264979	GE1	4	400	7	cop	icop	IntPosterior	4	11
2	m	1	18	7	#DIV/0!		GE1	4	400	7	PM	iPM	IntPosterior	4	10
2	m	1	18	8	0.0987358	0.0987358	GE1	4	400	7	crus1	icrus1	IntPosterior	4	8
2	m	1	18	9	0.10766	0.10766	GE1	4	400	7	sim	isim	IntPosterior	4	7
2	m	1	18	10	0.23107	0.23107	GE1	4	400	7	4/5	i4/5	IntAnterior	3	12
2	m	1	18	11	#DIV/0!		GE1	4	400	12	10	m10	MedPosterior	6	20
2	m	1	18	12	0.262215	0.262215	GE1	4	400	12	10	m10	MedPosterior	6	20
2	m	1	18	13	0.137319	0.137319	GE1	4	400	12	9	m9	MedPosterior	6	19
2	m	1	18	14	0.123915	0.123915	GE1	4	400	12	9	m9	MedPosterior	6	19
2	m	1	18	15	1.7217	1.7217	GE1	4	400	12	9	m9	MedPosterior	6	19
2	m	1	18	16	0.303956	0.303956	GE1	4	400	12	8	m8	MedPosterior	6	18
2	m	1	18	17	0.123995	0.123995	GE1	4	400	12	8	m8	MedPosterior	6	18
2	m	1	18	18	0.120926	0.120926	GE1	4	400	12	7	m7	MedPosterior	6	17
2	m	1	18	19	0.0599118	0.0599118	GE1	4	400	12	6	m6	MedPosterior	6	16
2	m	1	18	20	0.131179	0.131179	GE1	4	400	12	6	m6	MedPosterior	6	16
2	m	1	18	21	0.095341	0.095341	GE1	4	400	12	4/5	m4/5	MedAnterior	5	15
2	m	1	18	22	0.0704352	0.0704352	GE1	4	400	12	4/5	m4/5	MedAnterior	5	15
2	m	1	18	23	0.143312	0.143312	GE1	4	400	12	4/5	m4/5	MedAnterior	5	15
2	m	1	18	24	0.345519	0.345519	GE1	4	400	12	3	m3	MedAnterior	5	14
2	m	1	18	25	0.0653444	0.0653444	GE1	4	400	12	3	m3	MedAnterior	5	14
2	m	1	18	26	0.0766395	0.0766395	GE1	4	400	12	3	m3	MedAnterior	5	14
2	m	1	18	27	0.0947765	0.0947765	GE1	4	400	12	2	m2	MedAnterior	5	13
2	m	1	18	28	0.0963765	0.0963765	GE1	4	400	12	2	m2	MedAnterior	5	13
2	m	1	23	200709_1906	0.136295	0.136295	GE1	4	400	2	pfl	Lpfl	Vestibular	1	1
2	m	1	23	2	0.338538	0.338538	GE1	4	400	2	pfl	Lpfl	Vestibular	1	1
2	m	1	23	3	0.0797236	0.0797236	GE1	4	400	3	pfl	Lpfl	Vestibular	1	1
2	m	1	23	4	0.112703	0.112703	GE1	4	400	3	pfl	Lpfl	Vestibular	1	1
2	m	1	23	5	0.213582	0.213582	GE1	4	400	3	crus2	Lcrus2	Lateral	2	5
2	m	1	23	6	0.0529353	0.0529353	GE1	4	400	3	crus2	Lcrus2	Lateral	2	5
2	m	1	23	7	0.143128	0.143128	GE1	4	400	3	crus1	Lcrus1	Lateral	2	4
2	m	1	23	8	0.541265	0.541265	GE1	4	400	3	crus1	Lcrus1	Lateral	2	4
2	m	1	23	9	0.116009	0.116009	GE1	4	400	6	sim	isim	IntPosterior	4	7
2	m	1	23	10	0.06518	0.06518	GE1	4	400	7	4/5	i4/5	IntAnterior	3	12
2	m	1	23	11	0.10927	0.10927	GE1	4	400	7	cop	icop	IntPosterior	4	11
2	m	1	23	12	0.214213	0.214213	GE1	4	400	5	cop	icop	IntPosterior	4	11
2	m	1	23	13	0.14494	0.14494	GE1	4	400	5	pm	ipm	IntPosterior	4	10
2	m	1	23	14	0.0978524	0.0978524	GE1	4	400	5	crus1	icrus1	IntPosterior	4	8
2	m	1	23	15	0.0757241	0.0757241	GE1	4	400	5	crus2	icrus2	IntPosterior	4	9
2	m	1	23	16	0.07068	0.07068	GE1	4	400	5	sim	isim	IntPosterior	4	7
2	m	1	23	17	0.111456	0.111456	GE1	4	400	12	10	m10	MedPosterior	6	20
2	m	1	23	18	0.198966	0.198966	GE1	4	400	12	10	m10	MedPosterior	6	20
2	m	1	23	19	0.115597	0.115597	GE1	4	400	12	9	m9	MedPosterior	6	19
2	m	1	23	20	0.0352994	0.0352994	GE1	4	400	12	9	m9	MedPosterior	6	19
2	m	1	23	21	0.0622754	0.0622754	GE1	4	400	12	8	m8	MedPosterior	6	18
2	m	1	23	22	0.0529752	0.0529752	GE1	4	400	12	6	m6	MedPosterior	6	16
2	m	1	23	23	0.0646761	0.0646761	GE1	4	400	12	6	m6	MedPosterior	6	16
2	m	1	23	24	0.103508	0.103508	GE1	4	400	12	6	m6	MedPosterior	6	16
2	m	1	23	25	0.0533364	0.0533364	GE1	4	400	12	4/5	m4/5	MedAnterior	5	15
2	m	1	23	26	0.045613	0.045613	GE1	4	400	12	4/5	m4/5	MedAnterior	5	15
2	m	1	23	27	0.0483832	0.0483832	GE1	4	400	12	4/5	m4/5	MedAnterior	5	15
2	m	1	23	28	0.0595413	0.0595413	GE1	4	400	12	3	m3	MedAnterior	5	14
2	m	1	23	29	0.134679	0.134679	GE1	4	400	12	3	m3	MedAnterior	5	14
2	m	1	23	30	0.069712	0.069712	GE1	4	400	12	3	m3	MedAnterior	5	14
2	m	1	23	31	0.0801286	0.0801286	GE1	4	400	12	2	m2	MedAnterior	5	13
2	m	1	23	32	0.0458698	0.0458698	GE1	4	400	12	2	m2	MedAnterior	5	13
2	m	1	23	33	0.0900962	0.0900962	GE1	4	400	12	2	m2	MedAnterior	5	13

## Sheet: AtmN N; Aptx+ +
AtmN/N; Aptx+/+			Total # of animals	26
Genotype	sex	sex code (1=m)	sex code (1=m)	Exp. Date_Animal ID	Average frequency	Average frequency	Group	Age	Age days	slice	folia	Position name	Region name	Gross Region ID	Position ID								1-5 vs 6-10
3	f	0	1	191204b_2155	0.341904	0.341904	GE3	2	120	3	pfl	Lpfl	Vestibular	1	1		All time points		N	26									m					f
3	f	0	1	2	0.628492	0.628492	GE3	2	120	3	Crus2	LCrus2	Lateral	2	5		By Position ID	average	stdev	n	sem		By major regions	average	stdev	n	sem		average	stdev	n	sem		average	stdev	n	sem
3	f	0	1	3	#DIV/0!		GE3	2	120	3	Crus1	LCrus1	Lateral	2	4		Lpfl	0.365871	0.367509	28	0.0694527	1	Vestibular	0.263128	#N/A	50	#N/A	1	0.278685	#N/A	32	#N/A		0.3378	#N/A	18	#N/A
3	f	0	1	4	0.380125	0.380125	GE3	2	120	3	Crus1	LCrus1	Lateral	2	4		Lfl	0.216088	0.216094	22	0.0460715	2	Lateral	0.296082	#N/A	73	#N/A	2	0.356314	#N/A	42	#N/A		0.372057	#N/A	31	#N/A
3	f	0	1	5	#DIV/0!		GE3	2	120	6				#N/A	#N/A		Lsim	0.35342	0.193888	14	0.0518188	3	IntAnterior	0.226214	#N/A	10	#N/A	3	0.301189	#N/A	8	#N/A		0.343941	#N/A	2	#N/A
3	f	0	1	6	#DIV/0!		GE3	2	120	6	Crus1	iCrus1	IntPosterior	4	8		Lcrus1	0.35054	0.226467	25	0.0452933	4	IntPosterior	0.236234	#N/A	90	#N/A	4	0.285609	#N/A	57	#N/A		0.236851	#N/A	33	#N/A
3	f	0	1	7	0.295808	0.295808	GE3	2	120	6	Crus1	iCrus1	IntPosterior	4	8		Lcrus2	0.337095	0.229002	21	0.0499724	5	MedAnterior	0.147665	#N/A	180	#N/A	5	0.162109	#N/A	113	#N/A		0.138733	#N/A	67	#N/A
3	f	0	1	8	0.219471	0.219471	GE3	2	120	6	Crus2	iCrus2	IntPosterior	4	9		Lpm	0.463412	0.282982	12	0.0816898	6	MedPosterior	0.117771	#N/A	232	#N/A	6	0.125662	#N/A	146	#N/A		0.118068	#N/A	86	#N/A
3	f	0	1	9	0.0873491	0.0873491	GE3	2	120	12	2	m2	MedAnterior	5	13		isim	0.349541	0.338769	17	0.0821636	7
3	f	0	1	10	0.0909141	0.0909141	GE3	2	120	12	2	m2	MedAnterior	5	13		icrus1	0.197349	0.195911	17	0.0475153	8
3	f	0	1	11	0.137917	0.137917	GE3	2	120	12	3	m3	MedAnterior	5	14		icrus2	0.284002	0.27002	22	0.0575684	9
3	f	0	1	12	0.287725	0.287725	GE3	2	120	12	3	m3	MedAnterior	5	14		ipm	0.32409	0.39257	20	0.0877813	10
3	f	0	1	13	0.367115	0.367115	GE3	2	120	12	3	m3	MedAnterior	5	14		icop	0.147776	0.0632421	14	0.0169022	11
3	f	0	1	14	0.19633	0.19633	GE3	2	120	12	4/5	m4/5	MedAnterior	5	15		i4/5	0.326753	0.226208	9	0.0754025	12
3	f	0	1	15	0.140387	0.140387	GE3	2	120	12	4/5	m4/5	MedAnterior	5	15		m2	0.122117	0.0663834	50	0.00938802	13
3	f	0	1	16	0.256604	0.256604	GE3	2	120	12	4/5	m4/5	MedAnterior	5	15		m3	0.155623	0.0988567	59	0.01287	14
3	f	0	1	17	0.19973	0.19973	GE3	2	120	12	6	m6	MedPosterior	6	16		m4/5	0.173602	0.170729	71	0.0202618	15
3	f	0	1	18	0.0967618	0.0967618	GE3	2	120	12	6	m6	MedPosterior	6	16		m6	0.120312	0.0530556	45	0.00790906	16
3	f	0	1	19	#DIV/0!		GE3	2	120	12				#N/A	#N/A		m7	0.151935	0.120608	20	0.0269688	17
3	f	0	1	20	#DIV/0!		GE3	2	120	12				#N/A	#N/A		m8	0.108024	0.054105	45	0.0080655	18
3	f	0	1	21	0.292496	0.292496	GE3	2	120	12	8	m8	MedPosterior	6	18		m9	0.103235	0.0625938	68	0.00759062	19
3	f	0	1	22	0.114623	0.114623	GE3	2	120	12	9	m9	MedPosterior	6	19		m10	0.151235	0.206338	54	0.028079	20
3	f	0	1	23	0.0653773	0.0653773	GE3	2	120	12	9	m9	MedPosterior	6	19
3	f	0	1	24	0.0830419	0.0830419	GE3	2	120	12	9	m9	MedPosterior	6	19
3	f	0	1	25	0.0864387	0.0864387	GE3	2	120	12	10	m10	MedPosterior	6	20
3	f	0	1	26	0.0593115	0.0593115	GE3	2	120	12	10	m10	MedPosterior	6	20
3	m	1	2	191213a_2408	#DIV/0!		GE2	1	45	3	PFl	LPFl	Vestibular	1	1
3	m	1	2	2	0.111231	0.111231	GE2	1	45	6	Cop	iCop	IntPosterior	4	11
3	m	1	2	3	0.214979	0.214979	GE2	1	45	6	PM	iPM	IntPosterior	4	10
3	m	1	2	4	0.0601327	0.0601327	GE2	1	45	12	10	m10	MedPosterior	6	20
3	m	1	2	5	0.210191	0.210191	GE2	1	45	12	10	m10	MedPosterior	6	20
3	m	1	2	6	0.184333	0.184333	GE2	1	45	12	9	m9	MedPosterior	6	19
3	m	1	2	7	0.119635	0.119635	GE2	1	45	12	9	m9	MedPosterior	6	19
3	m	1	2	8	0.135531	0.135531	GE2	1	45	12	9	m9	MedPosterior	6	19
3	m	1	2	9	0.12035	0.12035	GE2	1	45	12	8	m8	MedPosterior	6	18
3	m	1	2	10	#DIV/0!		GE2	1	45	12	6	m6	MedPosterior	6	16
3	m	1	2	11	0.196161	0.196161	GE2	1	45	12	4/5	m4/5	MedAnterior	5	15
3	m	1	2	12	0.230369	0.230369	GE2	1	45	12	4/5	m4/5	MedAnterior	5	15
3	m	1	2	13	0.207829	0.207829	GE2	1	45	12	3	m3	MedAnterior	5	14
3	m	1	2	14	0.188341	0.188341	GE2	1	45	12	3	m3	MedAnterior	5	14
3	m	1	2	15	0.182291	0.182291	GE2	1	45	12	2	m2	MedAnterior	5	13		GE2	45 days	N	7									m					f
3	m	1	2	16	0.233576	0.233576	GE2	1	45	12	2	m2	MedAnterior	5	13		By Position ID	average	stdev	n	sem		By major regions	average	stdev	n	sem		average	stdev	n	sem		average	stdev	n	sem
3	m	1	3	191213b_2407	0.143682	0.143682	GE2	1	45	3	PFl	LPFl	Vestibular	1	1		Lpfl	0.345697	0.324353	10	0.102569		Vestibular	0.313063	#N/A	12	#N/A		0.385812	#N/A	5	#N/A		0.2611	#N/A	7	#N/A
3	m	1	3		1.15017	1.15017	GE2	1	45	3	PFl	LPFl	Vestibular	1	1		Lfl	0.149895	0.00209522	2	0.00148155		Lateral	0.39774	#N/A	19	#N/A		0.390279	#N/A	7	#N/A		0.402091	#N/A	12	#N/A
3	m	1	3		0.698153	0.698153	GE2	1	45	3	PM	LPM	Lateral	2	6		Lsim	0.528636	0.31964	3	0.184544		IntAnterior	0.250149	#N/A	3	#N/A		0.149186	#N/A	2	#N/A		0.452076	#N/A	1	#N/A
3	m	1	3		#DIV/0!		GE2	1	45	3	Crus2	LCrus2	Lateral	2	5		Lcrus1	0.313238	0.205637	7	0.0777235		IntPosterior	0.232616	#N/A	21	#N/A		0.290735	#N/A	11	#N/A		0.168685	#N/A	10	#N/A
3	m	1	3		0.129301	0.129301	GE2	1	45	3	crus1	Lcrus1	Lateral	2	4		Lcrus2	0.272432	0.14842	5	0.0663756		MedAnterior	0.200358	#N/A	44	#N/A		0.240822	#N/A	26	#N/A		0.141911	#N/A	18	#N/A
3	m	1	3		0.121929	0.121929	GE2	1	45	3	crus1	Lcrus1	Lateral	2	4		Lpm	0.60408	0.233557	4	0.116778		MedPosterior	0.152399	#N/A	56	#N/A		0.161693	#N/A	34	#N/A		0.138034	#N/A	22	#N/A
3	m	1	3		1.24885	1.24885	GE2	1	45	6	Sim	iSim	IntPosterior	4	7		isim	0.35952	0.498552	5	0.222959
3	m	1	3		#DIV/0!		GE2	1	45	6	Crus1	iCrus1	IntPosterior	4	8		icrus1	0.107566	0.00193178	2	0.00136597
3	m	1	3		0.0810035	0.0810035	GE2	1	45	6	Cop	iCop	IntPosterior	4	11		icrus2	0.256354	0.0843222	4	0.0421611
3	m	1	3		0.464688	0.464688	GE2	1	45	12	2	m2	MedAnterior	5	13		ipm	0.247933	0.133193	5	0.0595657
3	m	1	3		0.117554	0.117554	GE2	1	45	12	2	m2	MedAnterior	5	13		icop	0.121425	0.0372802	5	0.0166722
3	m	1	3		#DIV/0!		GE2	1	45	12	3	m3	MedAnterior	5	14		i4/5	0.296916	0.21943	2	0.15516
3	m	1	3		0.126358	0.126358	GE2	1	45	12	3	m3	MedAnterior	5	14		m2	0.150018	0.10458	13	0.0290054
3	m	1	3		#DIV/0!		GE2	1	45	12	3	m3		#N/A	14		m3	0.206308	0.149079	12	0.0430354
3	m	1	3		0.201339	0.201339	GE2	1	45	12	4/5	m4/5	MedAnterior	5	15		m4/5	0.231044	0.302465	19	0.0693902
3	m	1	3		1.46915	1.46915	GE2	1	45	12	4/5	m4/5	MedAnterior	5	15		m6	0.135683	0.0483177	10	0.0152794
3	m	1	3		0.187045	0.187045	GE2	1	45	12	4/5	m4/5	MedAnterior	5	15		m7	0.160804	0.0304761	4	0.0152381
3	m	1	3		0.160558	0.160558	GE2	1	45	12	6	m6	MedPosterior	6	16		m8	0.136721	0.0613377	13	0.017012
3	m	1	3		0.212311	0.212311	GE2	1	45	12	6	m6	MedPosterior	6	16		m9	0.114963	0.0518424	16	0.0129606
3	m	1	3		0.120502	0.120502	GE2	1	45	12	7	m7	MedPosterior	6	17		m10	0.224422	0.272744	13	0.0756456
3	m	1	3		0.0931333	0.0931333	GE2	1	45	12	8	m8	MedPosterior	6	18
3	m	1	3		0.258474	0.258474	GE2	1	45	12	8	m8	MedPosterior	6	18
3	m	1	3		#DIV/0!		GE2	1	45	12				#N/A	#N/A
3	m	1	3		0.197574	0.197574	GE2	1	45	12	9	m9	MedPosterior	6	19
3	m	1	3		0.0909181	0.0909181	GE2	1	45	12	9	m9	MedPosterior	6	19
3	m	1	3		0.103771	0.103771	GE2	1	45	12	10	m10	MedPosterior	6	20
3	m	1	3		0.0520418	0.0520418	GE2	1	45	12	10	m10	MedPosterior	6	20
3	m	1	4	200113_1923	0.246923	0.246923	GE4	3	210	2	Fl	LFl	Vestibular	1	2
3	m	1	4		0.0924649	0.0924649	GE4	3	210	2	Fl	LFl	Vestibular	1	2
3	m	1	4		0.0719019	0.0719019	GE4	3	210	2	Fl	LFl	Vestibular	1	2
3	m	1	4		0.21578	0.21578	GE4	3	210	3	Sim	LSim	Lateral	2	3
3	m	1	4		0.338726	0.338726	GE4	3	210	3	sim	Lsim	Lateral	2	3
3	m	1	4		#DIV/0!		GE4	3	210	3	crus1	Lcrus1	Lateral	2	4
3	m	1	4		0.189521	0.189521	GE4	3	210	3	crus2	Lcrus2	Lateral	2	5
3	m	1	4		1.03601	1.03601	GE4	3	210	3	PM	LPM	Lateral	2	6
3	m	1	4		0.147618	0.147618	GE4	3	210	3	cop	Lcop	lateral	2	#N/A
3	m	1	4		0.103498	0.103498	GE4	3	210	6	cop	icop	IntPosterior	4	11
3	m	1	4		1.67385	1.67385	GE4	3	210	6	pm	ipm	IntPosterior	4	10
3	m	1	4		0.298029	0.298029	GE4	3	210	6	crus2	icrus2	IntPosterior	4	9
3	m	1	4		0.0882409	0.0882409	GE4	3	210	6	crus1	icrus1	IntPosterior	4	8		GE3	120 days	N	6									m	N	5			f	N	1
3	m	1	4		0.13183	0.13183	GE4	3	210	11	2	m2	MedAnterior	5	13		By Position ID	average	stdev	n	sem		By major regions	average	stdev	n	sem		average	stdev	n	sem		average	stdev	n	sem
3	m	1	4		0.171796	0.171796	GE4	3	210	11	2	m2	MedAnterior	5	13		Lpfl	0.38398	0.341933	4	0.170967		Vestibular	0.312894	#N/A	6	#N/A		0.307092	#N/A	5	#N/A		0.341904	#N/A	1	#N/A
3	m	1	4		#DIV/0!		GE4	3	210	11	3	m3	MedAnterior	5	14		Lfl	0.170721	0.120704	2	0.085351		Lateral	0.460348	#N/A	14	#N/A		0.453022	#N/A	12	#N/A		0.504308	#N/A	2	#N/A
3	m	1	4		0.0824478	0.0824478	GE4	3	210	11	3	m3	MedAnterior	5	14		Lsim	0.260363	0.148371	4	0.0741856		IntAnterior	0.238401	#N/A	2	#N/A		0.238401	#N/A	2	#N/A		#DIV/0!	#N/A	0	#N/A
3	m	1	4		0.18593	0.18593	GE4	3	210	11	4/5	m4/5	MedAnterior	5	15		Lcrus1	0.543913	0.285633	5	0.127739		IntPosterior	0.293648	#N/A	21	#N/A		0.297439	#N/A	19	#N/A		0.257639	#N/A	2	#N/A
3	m	1	4		0.0941542	0.0941542	GE4	3	210	11	4/5	m4/5	MedAnterior	5	15		Lcrus2	0.599705	0.179518	4	0.0897588		MedAnterior	0.158339	#N/A	46	#N/A		0.150507	#N/A	38	#N/A		0.195543	#N/A	8	#N/A
3	m	1	4		0.238051	0.238051	GE4	3	210	11	4/5	m4/5	MedAnterior	5	15		Lpm	0.285042	#DIV/0!	1	#DIV/0!		MedPosterior	0.10136	#N/A	51	#N/A		0.097014	#N/A	43	#N/A		0.124723	#N/A	8	#N/A
3	m	1	4		0.194142	0.194142	GE4	3	210	11	6	m6	MedPosterior	6	16		isim	0.349962	0.2471	4	0.12355
3	m	1	4		0.0518282	0.0518282	GE4	3	210	11	6	m6	MedPosterior	6	16		icrus1	0.268864	0.0526757	5	0.0235573
3	m	1	4		#DIV/0!		GE4	3	210	11	7	m7	MedPosterior	6	17		icrus2	0.355528	0.226448	7	0.0855892
3	m	1	4		0.0710548	0.0710548	GE4	3	210	11	8	m8	MedPosterior	6	18		ipm	0.200864	0.161193	3	0.093065
3	m	1	4		0.0848584	0.0848584	GE4	3	210	11	8	m8	MedPosterior	6	18		icop	0.165582	0.0532012	2	0.0376189
3	m	1	4		0.0920226	0.0920226	GE4	3	210	11	9	m9	MedPosterior	6	19		i4/5	0.238401	0.0907737	2	0.0641867
3	m	1	4		0.0308693	0.0308693	GE4	3	210	11	9	m9	MedPosterior	6	19		m2	0.116668	0.0443443	12	0.0128011
3	m	1	4		0.0649274	0.0649274	GE4	3	210	11	9	m9	MedPosterior	6	19		m3	0.172847	0.11418	17	0.0276928
3	m	1	4		0.0835369	0.0835369	GE4	3	210	11	10	m10	MedPosterior	6	20		m4/5	0.173245	0.109788	17	0.0266275
3	m	1	4		0.085532	0.085532	GE4	3	210	11	10	m10	MedPosterior	6	20		m6	0.106902	0.0452101	12	0.013051
3	m	1	5	200131_2303	0.873793	0.873793	GE3	2	120	3	PFl	LPFl	Vestibular	1	1		m7	0.0869688	0.0181811	4	0.00909053
3	m	1	5		#DIV/0!		GE3	2	120	3	PFl	LPFl	Vestibular	1	1		m8	0.112643	0.0794067	8	0.0280745
3	m	1	5		0.256072	0.256072	GE3	2	120	3	Fl	LFl	Vestibular	1	2		m9	0.0913729	0.0371569	15	0.00959386
3	m	1	5		0.398483	0.398483	GE3	2	120	3	sim	Lsim	Lateral	2	3		m10	0.105579	0.0715723	12	0.0206611
3	m	1	5		0.826585	0.826585	GE3	2	120	3	crus1	Lcrus1	Lateral	2	4
3	m	1	5		0.386291	0.386291	GE3	2	120	3	crus2	Lcrus2	Lateral	2	5
3	m	1	5		#DIV/0!		GE3	2	120	3	PM	LPM	Lateral	2	6
3	m	1	5		0.681127	0.681127	GE3	2	120	6	sim	isim	IntPosterior	4	7
3	m	1	5		0.353247	0.353247	GE3	2	120	6	crus2	icrus2	IntPosterior	4	9
3	m	1	5		0.0672215	0.0672215	GE3	2	120	12	2	m2	MedAnterior	5	13
3	m	1	5		0.1253	0.1253	GE3	2	120	12	2	m2	MedAnterior	5	13
3	m	1	5		0.0890589	0.0890589	GE3	2	120	12	3	m3	MedAnterior	5	14
3	m	1	5		0.12437	0.12437	GE3	2	120	12	3	m3	MedAnterior	5	14
3	m	1	5		0.0856957	0.0856957	GE3	2	120	12	3	m3	MedAnterior	5	14
3	m	1	5		0.534161	0.534161	GE3	2	120	12	4/5	m4/5	MedAnterior	5	15
3	m	1	5		0.0795469	0.0795469	GE3	2	120	12	4/5	m4/5	MedAnterior	5	15
3	m	1	5		0.148872	0.148872	GE3	2	120	12	4/5	m4/5	MedAnterior	5	15
3	m	1	5		0.129552	0.129552	GE3	2	120	12	6	m6	MedPosterior	6	16
3	m	1	5		0.0439268	0.0439268	GE3	2	120	12	6	m6	MedPosterior	6	16
3	m	1	5		0.0789405	0.0789405	GE3	2	120	12	7	m7	MedPosterior	6	17
3	m	1	5		0.0644682	0.0644682	GE3	2	120	12	8	m8	MedPosterior	6	18
3	m	1	5		0.0547199	0.0547199	GE3	2	120	12	8	m8	MedPosterior	6	18
3	m	1	5		0.0621531	0.0621531	GE3	2	120	12	9	m9	MedPosterior	6	19		GE4	210 days	N	6									m	N	3			f	N	3
3	m	1	5		0.046074	0.046074	GE3	2	120	12	9	m9	MedPosterior	6	19		By Position ID	average	stdev	n	sem		By major regions	average	stdev	n	sem		average	stdev	n	sem		average	stdev	n	sem
3	m	1	5		0.0334792	0.0334792	GE3	2	120	12	9	m9	MedPosterior	6	19		Lpfl	0.270291	0.278493	4	0.139247		Vestibular	0.303209	#N/A	9	#N/A		0.126616	#N/A	5	#N/A		0.52395	#N/A	4	#N/A
3	m	1	5		0.309425	0.309425	GE3	2	120	12	10	m10	MedPosterior	6	20		Lfl	0.329543	0.428132	5	0.191467		Lateral	0.409148	#N/A	15	#N/A		0.42949	#N/A	7	#N/A		0.391348	#N/A	8	#N/A
3	m	1	5		0.0583995	0.0583995	GE3	2	120	12	10	m10	MedPosterior	6	20		Lsim	0.31114	0.13747	5	0.0614783		IntAnterior	#DIV/0!	#N/A	0	#N/A		#DIV/0!	#N/A	0	#N/A		#DIV/0!	#N/A	0	#N/A
3	m	1	6	200205a_2319	#DIV/0!		GE3	2	120	3	Fl	LFl	Vestibular	1	2		Lcrus1	0.511774	0.425116	2	0.300603		IntPosterior	0.438129	#N/A	18	#N/A		0.717722	#N/A	7	#N/A		0.260206	#N/A	11	#N/A
3	m	1	6		0.0936537	0.0936537	GE3	2	120	3	PFl	LPFl	Vestibular	1	1		Lcrus2	0.365274	0.32206	5	0.14403		MedAnterior	0.135005	#N/A	38	#N/A		0.145449	#N/A	19	#N/A		0.12456	#N/A	19	#N/A
3	m	1	6		0.761325	0.761325	GE3	2	120	3	crus1	Lcrus1	Lateral	2	4		Lpm	0.791991	0.345092	2	0.244017		MedPosterior	0.11591	#N/A	55	#N/A		0.125097	#N/A	26	#N/A		0.107672	#N/A	29	#N/A
3	m	1	6		0.616387	0.616387	GE3	2	120	3	crus1	Lcrus1	Lateral	2	4		isim	0.568134	0.30175	3	0.174216
3	m	1	6		0.387822	0.387822	GE3	2	120	6	sim	isim	IntPosterior	4	7		icrus1	0.0945727	0.0208108	4	0.0104054
3	m	1	6		0.0813246	0.0813246	GE3	2	120	6	crus2	icrus2	IntPosterior	4	9		icrus2	0.445987	0.543372	4	0.271686
3	m	1	6		0.384783	0.384783	GE3	2	120	6	PM	iPM	IntPosterior	4	10		ipm	0.761197	0.608158	5	0.271977
3	m	1	6		0.225117	0.225117	GE3	2	120	12	2	m2	MedAnterior	5	13		icop	0.106844	0.00473309	2	0.0033468
3	m	1	6		0.146357	0.146357	GE3	2	120	12	2	m2	MedAnterior	5	13		i4/5	#DIV/0!	#DIV/0!	0	#DIV/0!
3	m	1	6		0.172925	0.172925	GE3	2	120	12	3	m3	MedAnterior	5	14		m2	0.123818	0.0607636	11	0.0183209
3	m	1	6		0.147802	0.147802	GE3	2	120	12	3	m3	MedAnterior	5	14		m3	0.133072	0.0335252	11	0.0101082
3	m	1	6		0.178043	0.178043	GE3	2	120	12	3	m3	MedAnterior	5	14		m4/5	0.144025	0.0638429	16	0.0159607
3	m	1	6		0.130333	0.130333	GE3	2	120	12	4/5	m4/5	MedAnterior	5	15		m6	0.131134	0.0679987	11	0.0205024
3	m	1	6		0.105715	0.105715	GE3	2	120	12	4/5	m4/5	MedAnterior	5	15		m7	0.143672	0.120719	5	0.0539872
3	m	1	6		0.253433	0.253433	GE3	2	120	12	4/5	m4/5	MedAnterior	5	15		m8	0.0929622	0.0289012	10	0.00913936
3	m	1	6		0.133118	0.133118	GE3	2	120	12	6	m6	MedPosterior	6	16		m9	0.0964204	0.0438306	17	0.0106305
3	m	1	6		0.120085	0.120085	GE3	2	120	12	6	m6	MedPosterior	6	16		m10	0.137119	0.095279	12	0.0275047
3	m	1	6		0.113983	0.113983	GE3	2	120	12	7	m7	MedPosterior	6	17
3	m	1	6		0.106024	0.106024	GE3	2	120	12	8	m8	MedPosterior	6	18
3	m	1	6		0.105733	0.105733	GE3	2	120	12	9	m9	MedPosterior	6	19
3	m	1	6		0.0706416	0.0706416	GE3	2	120	12	10	m10	MedPosterior	6	20
3	m	1	6		0.124089	0.124089	GE3	2	120	12	10	m10	MedPosterior	6	20
3	m	1	7	200205b_2321	0.22657	0.22657	GE3	2	120	3	PFl	LPFl	Vestibular	1	1
3	m	1	7		0.376975	0.376975	GE3	2	120	3	sim	Lsim	Lateral	2	3
3	m	1	7		0.285042	0.285042	GE3	2	120	3	PM	LPM	Lateral	2	6
3	m	1	7		0.203201	0.203201	GE3	2	120	5	cop	icop	IntPosterior	4	11
3	m	1	7		0.426676	0.426676	GE3	2	120	5	crus2	icrus2	IntPosterior	4	9
3	m	1	7		0.636398	0.636398	GE3	2	120	5	crus2	icrus2	IntPosterior	4	9
3	m	1	7		0.331332	0.331332	GE3	2	120	5	crus1	icrus1	IntPosterior	4	8
3	m	1	7		0.289385	0.289385	GE3	2	120	5	crus1	icrus1	IntPosterior	4	8
3	m	1	7		0.302588	0.302588	GE3	2	120	5	4/5	i4/5	IntAnterior	3	12
3	m	1	7		0.143268	0.143268	GE3	2	120	12	2	m2	MedAnterior	5	13
3	m	1	7		0.144667	0.144667	GE3	2	120	12	2	m2	MedAnterior	5	13
3	m	1	7		0.155418	0.155418	GE3	2	120	12	3	m3	MedAnterior	5	14
3	m	1	7		0.124845	0.124845	GE3	2	120	12	3	m3	MedAnterior	5	14
3	m	1	7		0.236858	0.236858	GE3	2	120	12	4/5	m4/5	MedAnterior	5	15
3	m	1	7		0.118513	0.118513	GE3	2	120	12	4/5	m4/5	MedAnterior	5	15		GE1	400 days	N	7									m	N	4			f	N	3
3	m	1	7		0.17461	0.17461	GE3	2	120	12	4/5	m4/5	MedAnterior	5	15		By Position ID	average	stdev	n	sem		By major regions	average	stdev	n	sem		average	stdev	n	sem		average	stdev	n	sem
3	m	1	7		0.123568	0.123568	GE3	2	120	12	6	m6	MedPosterior	6	16		Lpfl	0.417032	0.477066	10	0.150862		Vestibular	0.288492	#N/A	23	#N/A		0.283548	#N/A	17	#N/A		0.302499	#N/A	6	#N/A
3	m	1	7		0.144526	0.144526	GE3	2	120	12	6	m6	MedPosterior	6	16		Lfl	0.189614	0.110498	13	0.0306467		Lateral	0.254392	#N/A	25	#N/A		0.236908	#N/A	16	#N/A		0.285475	#N/A	9	#N/A
3	m	1	7		0.0804103	0.0804103	GE3	2	120	12	7	m7	MedPosterior	6	17		Lsim	0.382411	0.0732956	2	0.0518278		IntAnterior	0.374029	#N/A	5	#N/A		0.408585	#N/A	4	#N/A		0.235807	#N/A	1	#N/A
3	m	1	7		#DIV/0!		GE3	2	120	12	8	m8	MedPosterior	6	18		Lcrus1	0.257067	0.111936	11	0.0337499		IntPosterior	0.171932	#N/A	30	#N/A		0.120313	#N/A	20	#N/A		0.27517	#N/A	10	#N/A
3	m	1	7		0.118987	0.118987	GE3	2	120	12	9	m9	MedPosterior	6	19		Lcrus2	0.213093	0.0824504	7	0.0311633		MedAnterior	0.122767	#N/A	52	#N/A		0.119138	#N/A	30	#N/A		0.127716	#N/A	22	#N/A
3	m	1	7		0.164922	0.164922	GE3	2	120	12	9	m9	MedPosterior	6	19		Lpm	0.25512	0.116523	5	0.0521106		MedPosterior	0.120311	#N/A	70	#N/A		0.126162	#N/A	43	#N/A		0.110994	#N/A	27	#N/A
3	m	1	7		0.0768682	0.0768682	GE3	2	120	12	10	m10	MedPosterior	6	20		isim	0.208069	0.241256	5	0.107893
3	m	1	7		0.0504663	0.0504663	GE3	2	120	12	10	m10	MedPosterior	6	20		icrus1	0.2362	0.318965	6	0.130217
3	m	1	8	200220_2118	0.0710814	0.0710814	GE4	3	210	3	PFl	LPFl	Vestibular	1	1		icrus2	0.135711	0.0556846	7	0.0210468
3	m	1	8		0.530807	0.530807	GE4	3	210	3	sim	Lsim	Lateral	2	3		ipm	0.11908	0.0167634	7	0.00633597
3	m	1	8		0.547974	0.547974	GE4	3	210	3	PM	LPM	Lateral	2	6		icop	0.183376	0.0862974	5	0.0385934
3	m	1	8		#DIV/0!		GE4	3	210	6	sim	isim	IntPosterior	4	7		i4/5	0.374029	0.284781	5	0.127358
3	m	1	8		1.25094	1.25094	GE4	3	210	6	crus2	icrus2	IntPosterior	4	9		m2	0.0995446	0.0255586	14	0.00683083
3	m	1	8		0.599535	0.599535	GE4	3	210	6	PM	iPM	IntPosterior	4	10		m3	0.121257	0.0463119	19	0.0106247
3	m	1	8		0.0939757	0.0939757	GE4	3	210	12	2	m2	MedAnterior	5	13		m4/5	0.141388	0.0490217	19	0.0112463
3	m	1	8		0.0839002	0.0839002	GE4	3	210	12	2	m2	MedAnterior	5	13		m6	0.110992	0.0497914	12	0.0143735
3	m	1	8		0.110576	0.110576	GE4	3	210	12	3	m3	MedAnterior	5	14		m7	0.189894	0.176392	7	0.0666698
3	m	1	8		0.163238	0.163238	GE4	3	210	12	3	m3	MedAnterior	5	14		m8	0.0894956	0.0328739	14	0.00878592
3	m	1	8		0.3052	0.3052	GE4	3	210	12	4/5	m4/5	MedAnterior	5	15		m9	0.108542	0.0936004	20	0.0209297
3	m	1	8		#DIV/0!		GE4	3	210	12	4/5	m4/5	MedAnterior	5	15		m10	0.137462	0.263077	17	0.0638055
3	m	1	8		0.136611	0.136611	GE4	3	210	12	4/5	m4/5	MedAnterior	5	15
3	m	1	8		0.109457	0.109457	GE4	3	210	12	6	m6	MedPosterior	6	16
3	m	1	8		#DIV/0!		GE4	3	210	12	6	m6	MedPosterior	6	16
3	m	1	8		0.358971	0.358971	GE4	3	210	12	7	m7	MedPosterior	6	17
3	m	1	8		#DIV/0!		GE4	3	210	12	8	m8	MedPosterior	6	18
3	m	1	8		0.064344	0.064344	GE4	3	210	12	9	m9	MedPosterior	6	19
3	m	1	8		0.0793315	0.0793315	GE4	3	210	12	9	m9	MedPosterior	6	19
3	m	1	8		0.175499	0.175499	GE4	3	210	12	9	m9	MedPosterior	6	19
3	m	1	8		0.182967	0.182967	GE4	3	210	12	10	m10	MedPosterior	6	20
3	m	1	8		0.118474	0.118474	GE4	3	210	12	10	m10	MedPosterior	6	20
3	m	1	9	200227_2573	0.482915	0.482915	GE2	1	45	3	Crus1	LCrus1	Lateral	2	4
3	m	1	9	2	0.330738	0.330738	GE2	1	45	3	PFl	LPFl	Vestibular	1	1
3	m	1	9	3	0.141756	0.141756	GE2	1	45	6	4/5	i4/5	IntAnterior	3	12
3	m	1	9	4	0.201674	0.201674	GE2	1	45	6	sim	isim	IntPosterior	4	7
3	m	1	9	5	0.108932	0.108932	GE2	1	45	6	Crus1	iCrus1	IntPosterior	4	8
3	m	1	9	6	0.356089	0.356089	GE2	1	45	6	Crus2	iCrus2	IntPosterior	4	9
3	m	1	9	7	0.176427	0.176427	GE2	1	45	6	Crus2	iCrus2	IntPosterior	4	9
3	m	1	9	8	0.156411	0.156411	GE2	1	45	6	PM	iPM	IntPosterior	4	10
3	m	1	9	9	0.176054	0.176054	GE2	1	45	6	cop	icop	IntPosterior	4	11
3	m	1	9	10	0.0894444	0.0894444	GE2	1	45	11	2	m2	MedAnterior	5	13
3	m	1	9	11	0.106102	0.106102	GE2	1	45	11	2	m2	MedAnterior	5	13
3	m	1	9	12	0.101441	0.101441	GE2	1	45	11	3	m3	MedAnterior	5	14
3	m	1	9	13	0.654507	0.654507	GE2	1	45	11	3	m3	MedAnterior	5	14
3	m	1	9	14	0.191438	0.191438	GE2	1	45	11	4/5	m4/5	MedAnterior	5	15
3	m	1	9	15	0.165327	0.165327	GE2	1	45	11	4/5	m4/5	MedAnterior	5	15
3	m	1	9	16	0.172748	0.172748	GE2	1	45	11	4/5	m4/5	MedAnterior	5	15
3	m	1	9	17	0.194056	0.194056	GE2	1	45	11	6	m6	MedPosterior	6	16
3	m	1	9	18	0.0849055	0.0849055	GE2	1	45	11	6	m6	MedPosterior	6	16
3	m	1	9	19	0.194254	0.194254	GE2	1	45	11	7	m7	MedPosterior	6	17
3	m	1	9	20	0.11713	0.11713	GE2	1	45	11	8	m8	MedPosterior	6	18
3	m	1	9	21	0.122277	0.122277	GE2	1	45	11	8	m8	MedPosterior	6	18
3	m	1	9	22	0.0659282	0.0659282	GE2	1	45	11	9	m9	MedPosterior	6	19
3	m	1	9	23	0.107414	0.107414	GE2	1	45	11	9	m9	MedPosterior	6	19
3	m	1	9	24	0.0624356	0.0624356	GE2	1	45	11	9	m9	MedPosterior	6	19
3	m	1	9	25	0.0948284	0.0948284	GE2	1	45	11	10	m10	MedPosterior	6	20
3	m	1	9	26	0.112618	0.112618	GE2	1	45	11	10	m10	MedPosterior	6	20
3	m	1	10	200228_2577	0.143176	0.143176	GE2	1	45	3	PFl	LPFl	Vestibular	1	1
3	m	1	10	2	0.161291	0.161291	GE2	1	45	3	PFl	LPFl	Vestibular	1	1
3	m	1	10	3	0.635757	0.635757	GE2	1	45	3	PM	LPM	Lateral	2	6
3	m	1	10	4	0.164413	0.164413	GE2	1	45	3	Crus2	LCrus2	Lateral	2	5
3	m	1	10	5	0.499489	0.499489	GE2	1	45	3	Crus1	LCrus1	Lateral	2	4
3	m	1	10	6	#DIV/0!		GE2	1	45	3	sim	Lsim	Lateral	2	3
3	m	1	10	7	0.366439	0.366439	GE2	1	45	7	PM	iPM	IntPosterior	4	10
3	m	1	10	8	#DIV/0!		GE2	1	45	7	4/5	i4/5	IntAnterior	3	12
3	m	1	10	9	0.156616	0.156616	GE2	1	45	7	3	i3	intanterior
3	m	1	10	10	0.134708	0.134708	GE2	1	45	12	2	m2	MedAnterior	5	13
3	m	1	10	11	0.102427	0.102427	GE2	1	45	12	2	m2	MedAnterior	5	13
3	m	1	10	12	0.0733022	0.0733022	GE2	1	45	12	3	m3	MedAnterior	5	14
3	m	1	10	13	0.152228	0.152228	GE2	1	45	12	3	m3	MedAnterior	5	14
3	m	1	10	14	0.211957	0.211957	GE2	1	45	12	4/5	m4/5	MedAnterior	5	15
3	m	1	10	15	0.093157	0.093157	GE2	1	45	12	4/5	m4/5	MedAnterior	5	15
3	m	1	10	16	0.20787	0.20787	GE2	1	45	12	4/5	m4/5	MedAnterior	5	15
3	m	1	10	17	0.142629	0.142629	GE2	1	45	12	6	m6	MedPosterior	6	16
3	m	1	10	18	0.167373	0.167373	GE2	1	45	12	7	m7	MedPosterior	6	17
3	m	1	10	19	0.12735	0.12735	GE2	1	45	12	8	m8	MedPosterior	6	18
3	m	1	10	20	0.281876	0.281876	GE2	1	45	12	8	m8	MedPosterior	6	18
3	m	1	10	21	0.232628	0.232628	GE2	1	45	12	9	m9	MedPosterior	6	19
3	m	1	10	22	0.0882279	0.0882279	GE2	1	45	12	9	m9	MedPosterior	6	19
3	m	1	10	23	0.121083	0.121083	GE2	1	45	12	9	m9	MedPosterior	6	19
3	m	1	10	24	0.0794354	0.0794354	GE2	1	45	12	10	m10	MedPosterior	6	20
3	m	1	10	25	0.981662	0.981662	GE2	1	45	12	10	m10	MedPosterior	6	20
3	m	1	11	200302_2151	#DIV/0!		GE4	3	210	3	pfl	Lpfl	Vestibular	1	1
3	m	1	11	2	0.150709	0.150709	GE4	3	210	3	fl	Lfl	Vestibular	1	2
3	m	1	11	3	#DIV/0!		GE4	3	210	3	Pm	LPm	Lateral	2	6
3	m	1	11	4	#DIV/0!		GE4	3	210	6	4/5	i4/5	IntAnterior	3	12
3	m	1	11	5	1.00996	1.00996	GE4	3	210	6	PM	iPM	IntPosterior	4	10
3	m	1	11	6	0.248341	0.248341	GE4	3	210	12	10	m10	MedPosterior	6	20
3	m	1	11	7	0.38116	0.38116	GE4	3	210	12	10	m10	MedPosterior	6	20
3	m	1	11	8	0.0668808	0.0668808	GE4	3	210	12	9	m9	MedPosterior	6	19
3	m	1	11	9	0.0879648	0.0879648	GE4	3	210	12	9	m9	MedPosterior	6	19
3	m	1	11	10	0.192245	0.192245	GE4	3	210	12	9	m9	MedPosterior	6	19
3	m	1	11	11	0.0774463	0.0774463	GE4	3	210	12	8	m8	MedPosterior	6	18
3	m	1	11	12	0.0706821	0.0706821	GE4	3	210	12	8	m8	MedPosterior	6	18
3	m	1	11	13	0.0977123	0.0977123	GE4	3	210	12	7	m7	MedPosterior	6	17
3	m	1	11	14	0.0796861	0.0796861	GE4	3	210	12	6	m6	MedPosterior	6	16
3	m	1	11	15	0.102597	0.102597	GE4	3	210	12	6	m6	MedPosterior	6	16
3	m	1	11	16	0.113713	0.113713	GE4	3	210	12	4/5	m4/5	MedAnterior	5	15
3	m	1	11	17	0.095089	0.095089	GE4	3	210	12	4/5	m4/5	MedAnterior	5	15
3	m	1	11	18	0.114323	0.114323	GE4	3	210	12	4/5	m4/5	MedAnterior	5	15
3	m	1	11	19	0.148326	0.148326	GE4	3	210	12	3	m3	MedAnterior	5	14
3	m	1	11	20	0.102628	0.102628	GE4	3	210	12	3	m3	MedAnterior	5	14
3	m	1	11	21	0.114679	0.114679	GE4	3	210	12	2	m2	MedAnterior	5	13
3	m	1	11	22	0.277069	0.277069	GE4	3	210	12	2	m2	MedAnterior	5	13
3	m	1	12	200303a_1266	0.974072	0.974072	GE1	4	400	3	pfl	Lpfl	Vestibular	1	1
3	m	1	12		0.093241	0.093241	GE1	4	400	3	fl	Lfl	Vestibular	1	2
3	m	1	12		0.407969	0.407969	GE1	4	400	3	fl	Lfl	Vestibular	1	2
3	m	1	12		#DIV/0!		GE1	4	400	3	pm	Lpm	Lateral	2	6
3	m	1	12		0.143103	0.143103	GE1	4	400	3	pm	Lpm	Lateral	2	6
3	m	1	12		0.251024	0.251024	GE1	4	400	3	crus2	Lcrus2	Lateral	2	5
3	m	1	12		0.293069	0.293069	GE1	4	400	3	crus2	Lcrus2	Lateral	2	5
3	m	1	12		0.257567	0.257567	GE1	4	400	3	crus1	Lcrus1	Lateral	2	4
3	m	1	12		0.0974362	0.0974362	GE1	4	400	6	pm	ipm	IntPosterior	4	10
3	m	1	12		0.174615	0.174615	GE1	4	400	6	crus2	icrus2	IntPosterior	4	9
3	m	1	12		0.109063	0.109063	GE1	4	400	6	crus1	icrus1	IntPosterior	4	8
3	m	1	12		#DIV/0!		GE1	4	400	6	sim	isim	IntPosterior	4	7
3	m	1	12		0.118926	0.118926	GE1	4	400	6	4/5	i4/5	IntAnterior	3	12
3	m	1	12		0.0647313	0.0647313	GE1	4	400	12	2	m2	MedAnterior	5	13
3	m	1	12		0.102056	0.102056	GE1	4	400	12	2	m2	MedAnterior	5	13
3	m	1	12		0.159979	0.159979	GE1	4	400	12	3	m3	MedAnterior	5	14
3	m	1	12		0.131373	0.131373	GE1	4	400	12	3	m3	MedAnterior	5	14
3	m	1	12		0.164106	0.164106	GE1	4	400	12	4/5	m4/5	MedAnterior	5	15
3	m	1	12		0.203108	0.203108	GE1	4	400	12	4/5	m4/5	MedAnterior	5	15
3	m	1	12		0.152204	0.152204	GE1	4	400	12	4/5	m4/5	MedAnterior	5	15
3	m	1	12		0.124583	0.124583	GE1	4	400	12	6	m6	MedPosterior	6	16
3	m	1	12		0.0696271	0.0696271	GE1	4	400	12	6	m6	MedPosterior	6	16
3	m	1	12		0.56346	0.56346	GE1	4	400	12	7	m7	MedPosterior	6	17
3	m	1	12		0.0896059	0.0896059	GE1	4	400	12	8	m8	MedPosterior	6	18
3	m	1	12		0.0983853	0.0983853	GE1	4	400	12	8	m8	MedPosterior	6	18
3	m	1	12		0.0507777	0.0507777	GE1	4	400	12	9	m9	MedPosterior	6	19
3	m	1	12		0.124296	0.124296	GE1	4	400	12	9	m9	MedPosterior	6	19
3	m	1	12		0.0596927	0.0596927	GE1	4	400	12	9	m9	MedPosterior	6	19
3	m	1	12		1.14644	1.14644	GE1	4	400	12	10	m10	MedPosterior	6	20
3	m	1	12		0.094013	0.094013	GE1	4	400	12	10	m10	MedPosterior	6	20
3	f	0	13	200304_1306	0.201454	0.201454	GE1	4	400	3	fl	Lfl	Vestibular	1	2
3	f	0	13		0.322597	0.322597	GE1	4	400	3	fl	Lfl	Vestibular	1	2
3	f	0	13		0.115874	0.115874	GE1	4	400	3	pfl	Lpfl	Vestibular	1	1
3	f	0	13		0.228085	0.228085	GE1	4	400	3	pm	Lpm	Lateral	2	6
3	f	0	13		0.0932568	0.0932568	GE1	4	400	3	crus2	Lcrus2	Lateral	2	5
3	f	0	13		0.256793	0.256793	GE1	4	400	3	crus1	Lcrus1	Lateral	2	4
3	f	0	13		0.165057	0.165057	GE1	4	400	3	crus1	Lcrus1	Lateral	2	4
3	f	0	13		0.11072	0.11072	GE1	4	400	6	crus1	icrus1	IntPosterior	4	8
3	f	0	13		0.227701	0.227701	GE1	4	400	6	crus2	icrus2	IntPosterior	4	9
3	f	0	13		0.103659	0.103659	GE1	4	400	12	2	m2	MedAnterior	5	13
3	f	0	13		0.138594	0.138594	GE1	4	400	12	2	m2	MedAnterior	5	13
3	f	0	13		0.166379	0.166379	GE1	4	400	12	3	m3	MedAnterior	5	14
3	f	0	13		0.245267	0.245267	GE1	4	400	12	3	m3	MedAnterior	5	14
3	f	0	13		0.174558	0.174558	GE1	4	400	12	3	m3	MedAnterior	5	14
3	f	0	13		0.0716578	0.0716578	GE1	4	400	12	4/5	m4/5	MedAnterior	5	15
3	f	0	13		0.131798	0.131798	GE1	4	400	12	4/5	m4/5	MedAnterior	5	15
3	f	0	13		0.0712007	0.0712007	GE1	4	400	11	8	m8	MedPosterior	6	18
3	f	0	13		0.0410358	0.0410358	GE1	4	400	11	8	m8	MedPosterior	6	18
3	f	0	13		0.0756718	0.0756718	GE1	4	400	11	9	m9	MedPosterior	6	19
3	f	0	13		0.0784085	0.0784085	GE1	4	400	11	9	m9	MedPosterior	6	19
3	f	0	13		0.0981469	0.0981469	GE1	4	400	11	9	m9	MedPosterior	6	19
3	f	0	13		0.0550262	0.0550262	GE1	4	400	11	10	m10	MedPosterior	6	20
3	f	0	13		0.0536366	0.0536366	GE1	4	400	11	10	m10	MedPosterior	6	20
3	f	0	14	200305a_1262	0.298964	0.298964	GE1	4	400	3	fl	Lfl	Vestibular	1	2
3	f	0	14		0.462269	0.462269	GE1	4	400	3	crus1	Lcrus1	Lateral	2	4
3	f	0	14		0.885246	0.885246	GE1	4	400	6	crus1	icrus1	IntPosterior	4	8
3	f	0	14		#DIV/0!		GE1	4	400	6	pm	ipm	IntPosterior	4	10
3	f	0	14		0.202285	0.202285	GE1	4	400	6	cop	icop	IntPosterior	4	11
3	f	0	14		0.124142	0.124142	GE1	4	400	11	2	m2	MedAnterior	5	13
3	f	0	14		0.112903	0.112903	GE1	4	400	11	2	m2	MedAnterior	5	13
3	f	0	14		0.105891	0.105891	GE1	4	400	11	3	m3	MedAnterior	5	14
3	f	0	14		0.106668	0.106668	GE1	4	400	11	3	m3	MedAnterior	5	14
3	f	0	14		0.0936526	0.0936526	GE1	4	400	11	4/5	m4/5	MedAnterior	5	15
3	f	0	14		0.190173	0.190173	GE1	4	400	11	4/5	m4/5	MedAnterior	5	15
3	f	0	14		0.103793	0.103793	GE1	4	400	11	4/5	m4/5	MedAnterior	5	15
3	f	0	14		0.0792422	0.0792422	GE1	4	400	11	6	m6	MedPosterior	6	16
3	f	0	14		0.139909	0.139909	GE1	4	400	11	6	m6	MedPosterior	6	16
3	f	0	14		0.163228	0.163228	GE1	4	400	11	7	m7	MedPosterior	6	17
3	f	0	14		0.109063	0.109063	GE1	4	400	11	8	m8	MedPosterior	6	18
3	f	0	14		0.0851834	0.0851834	GE1	4	400	11	8	m8	MedPosterior	6	18
3	f	0	14		0.0979091	0.0979091	GE1	4	400	11	9	m9	MedPosterior	6	19
3	f	0	14		0.064414	0.064414	GE1	4	400	11	9	m9	MedPosterior	6	19
3	f	0	14		0.465385	0.465385	GE1	4	400	11	9	m9	MedPosterior	6	19
3	f	0	14		0.0957531	0.0957531	GE1	4	400	11	10	m10	MedPosterior	6	20
3	f	0	14		0.218867	0.218867	GE1	4	400	11	10	m10	MedPosterior	6	20
3	f	0	15	200309_2597	0.101183	0.101183	GE2	1	45	3	pfl	Lpfl	Vestibular	1	1
3	f	0	15		0.646054	0.646054	GE2	1	45	3	pfl	Lpfl	Vestibular	1	1
3	f	0	15		#DIV/0!		GE2	1	45	3	sim	Lsim	Lateral	2	3
3	f	0	15		0.154928	0.154928	GE2	1	45	3	crus1	Lcrus1	Lateral	2	4
3	f	0	15		0.221815	0.221815	GE2	1	45	3	crus2	Lcrus2	Lateral	2	5
3	f	0	15		0.110912	0.110912	GE2	1	45	6	sim	isim	IntPosterior	4	7
3	f	0	15		0.1062	0.1062	GE2	1	45	6	crus1	icrus1	IntPosterior	4	8
3	f	0	15		0.295434	0.295434	GE2	1	45	6	crus2	icrus2	IntPosterior	4	9
3	f	0	15		0.0969074	0.0969074	GE2	1	45	6	pm	ipm	IntPosterior	4	10
3	f	0	15		0.0990598	0.0990598	GE2	1	45	6	cop	icop	IntPosterior	4	11
3	f	0	15		0.084443	0.084443	GE2	1	45	12	2	m2	MedAnterior	5	13
3	f	0	15		0.0918863	0.0918863	GE2	1	45	12	2	m2	MedAnterior	5	13
3	f	0	15		0.154449	0.154449	GE2	1	45	12	3	m3	MedAnterior	5	14
3	f	0	15		0.170307	0.170307	GE2	1	45	12	3	m3	MedAnterior	5	14
3	f	0	15		0.14358	0.14358	GE2	1	45	12	4/5	m4/5	MedAnterior	5	15
3	f	0	15		0.131605	0.131605	GE2	1	45	12	4/5	m4/5	MedAnterior	5	15
3	f	0	15		0.111998	0.111998	GE2	1	45	12	4/5	m4/5	MedAnterior	5	15
3	f	0	15		#DIV/0!		GE2	1	45	12	6	m6	MedPosterior	6	16
3	f	0	15		0.127315	0.127315	GE2	1	45	12	6	m6	MedPosterior	6	16
3	f	0	15		0.115945	0.115945	GE2	1	45	12	8	m8	MedPosterior	6	18
3	f	0	15		0.0760821	0.0760821	GE2	1	45	12	8	m8	MedPosterior	6	18
3	f	0	15		0.0739216	0.0739216	GE2	1	45	12	9	m9	MedPosterior	6	19
3	f	0	15		0.082239	0.082239	GE2	1	45	12	9	m9	MedPosterior	6	19
3	f	0	15		0.225966	0.225966	GE2	1	45	12	10	m10	MedPosterior	6	20
3	f	0	15		0.059539	0.059539	GE2	1	45	12	10	m10	MedPosterior	6	20
3	f	0	16	2003010_2178	0.252225	0.252225	GE4	3	210	3	pfl	Lpfl	Vestibular	1	1
3	f	0	16	2	0.0881877	0.0881877	GE4	3	210	3	pfl	Lpfl	Vestibular	1	1
3	f	0	16	3	#DIV/0!		GE4	3	210	3	pfl	Lpfl	Vestibular	1	1
3	f	0	16	4	#DIV/0!		GE4	3	210	3	crus2	Lcrus2	Lateral	2	5
3	f	0	16	5	0.169906	0.169906	GE4	3	210	3	crus2	Lcrus2	Lateral	2	5
3	f	0	16	6	0.211171	0.211171	GE4	3	210	3	crus1	Lcrus1	Lateral	2	4
3	f	0	16	7	0.180661	0.180661	GE4	3	210	3	sim	Lsim	Lateral	2	3
3	f	0	16	8	#DIV/0!		GE4	3	210	6	4/5	i4/5	IntAnterior	3	12
3	f	0	16	9	0.0933987	0.0933987	GE4	3	210	6	crus1	icrus1	IntPosterior	4	8
3	f	0	16	10	0.124058	0.124058	GE4	3	210	6	crus2	icrus2	IntPosterior	4	9
3	f	0	16	11	#DIV/0!		GE4	3	210	6	cop	icop	IntPosterior	4	11
3	f	0	16	12	0.079731	0.079731	GE4	3	210	11	2	m2	MedAnterior	5	13
3	f	0	16	13	0.139706	0.139706	GE4	3	210	11	2	m2	MedAnterior	5	13
3	f	0	16	14	0.147769	0.147769	GE4	3	210	11	3	m3	MedAnterior	5	14
3	f	0	16	15	0.128639	0.128639	GE4	3	210	11	3	m3	MedAnterior	5	14
3	f	0	16	16	0.125128	0.125128	GE4	3	210	11	3	m3	MedAnterior	5	14
3	f	0	16	17	0.103409	0.103409	GE4	3	210	11	4/5	m4/5	MedAnterior	5	15
3	f	0	16	18	0.0696887	0.0696887	GE4	3	210	11	4/5	m4/5	MedAnterior	5	15
3	f	0	16	19	0.105081	0.105081	GE4	3	210	11	4/5	m4/5	MedAnterior	5	15
3	f	0	16	20	0.11002	0.11002	GE4	3	210	11	6	m6	MedPosterior	6	16
3	f	0	16	21	0.0596266	0.0596266	GE4	3	210	11	6	m6	MedPosterior	6	16
3	f	0	16	22	0.0776837	0.0776837	GE4	3	210	11	7	m7	MedPosterior	6	17
3	f	0	16	23	0.0968418	0.0968418	GE4	3	210	11	8	m8	MedPosterior	6	18
3	f	0	16	24	0.0978457	0.0978457	GE4	3	210	11	8	m8	MedPosterior	6	18
3	f	0	16	25	0.0886139	0.0886139	GE4	3	210	11	9	m9	MedPosterior	6	19
3	f	0	16	26	0.0499889	0.0499889	GE4	3	210	11	9	m9	MedPosterior	6	19
3	f	0	16	27	0.115446	0.115446	GE4	3	210	11	10	m10	MedPosterior	6	20
3	f	0	16	28	0.105438	0.105438	GE4	3	210	11	10	m10	MedPosterior	6	20
3	f	0	17	2003012_2638	0.151376	0.151376	GE2	1	45	3	fl	Lfl	Vestibular	1	2
3	f	0	17		0.211209	0.211209	GE2	1	45	3	pfl	Lpfl	Vestibular	1	1
3	f	0	17		0.148413	0.148413	GE2	1	45	3	fl	Lfl	Vestibular	1	2
3	f	0	17		0.221154	0.221154	GE2	1	45	3	pfl	Lpfl	Vestibular	1	1
3	f	0	17		0.232879	0.232879	GE2	1	45	3	sim	Lsim	Lateral	2	3
3	f	0	17		0.485293	0.485293	GE2	1	45	3	sim	Lsim	Lateral	2	3
3	f	0	17		0.203343	0.203343	GE2	1	45	3	crus1	Lcrus1	Lateral	2	4
3	f	0	17		#DIV/0!		GE2	1	45	3	crus1	Lcrus1	Lateral	2	4
3	f	0	17		0.255109	0.255109	GE2	1	45	3	crus2	Lcrus2	Lateral	2	5
3	f	0	17		0.189967	0.189967	GE2	1	45	3	crus2	Lcrus2	Lateral	2	5
3	f	0	17		0.271124	0.271124	GE2	1	45	3	pm	Lpm	Lateral	2	6
3	f	0	17		0.139778	0.139778	GE2	1	45	6	cop	icop	IntPosterior	4	11
3	f	0	17		0.404927	0.404927	GE2	1	45	6	pm	ipm	IntPosterior	4	10
3	f	0	17		0.197465	0.197465	GE2	1	45	6	crus2	icrus2	IntPosterior	4	9
3	f	0	17		0.0766238	0.0766238	GE2	1	45	11	2	m2	MedAnterior	5	13
3	f	0	17		0.106564	0.106564	GE2	1	45	11	2	m2	MedAnterior	5	13
3	f	0	17		0.206599	0.206599	GE2	1	45	11	3	m3	MedAnterior	5	14
3	f	0	17		0.199087	0.199087	GE2	1	45	11	3	m3	MedAnterior	5	14
3	f	0	17		0.158946	0.158946	GE2	1	45	11	4/5	m4/5	MedAnterior	5	15
3	f	0	17		0.165871	0.165871	GE2	1	45	11	4/5	m4/5	MedAnterior	5	15
3	f	0	17		0.166411	0.166411	GE2	1	45	11	6	m6	MedPosterior	6	16
3	f	0	17		0.063883	0.063883	GE2	1	45	11	6	m6	MedPosterior	6	16
3	f	0	17		0.161086	0.161086	GE2	1	45	11	7	m7	MedPosterior	6	17
3	f	0	17		0.1013	0.1013	GE2	1	45	11	8	m8	MedPosterior	6	18
3	f	0	17		0.10745	0.10745	GE2	1	45	11	8	m8	MedPosterior	6	18
3	f	0	17		0.132724	0.132724	GE2	1	45	11	9	m9	MedPosterior	6	19
3	f	0	17		#DIV/0!		GE2	1	45	11	9	m9	MedPosterior	6	19
3	f	0	17		0.250437	0.250437	GE2	1	45	11	10	m10	MedPosterior	6	20
3	f	0	17		0.609219	0.609219	GE2	1	45	11	10	m10	MedPosterior	6	20
3	f	0	18	200401_2629	0.348307	0.348307	GE2	1	45	3	pfl	Lpfl	Vestibular	1	1
3	f	0	18	2	#DIV/0!		GE2	1	45	3	pm	Lpm	Lateral	2	6
3	f	0	18	3	0.811284	0.811284	GE2	1	45	3	pm	Lpm	Lateral	2	6
3	f	0	18	4	0.530857	0.530857	GE2	1	45	3	crus2	Lcrus2	Lateral	2	5
3	f	0	18	5	0.60076	0.60076	GE2	1	45	3	crus1	Lcrus1	Lateral	2	4
3	f	0	18	6	0.867736	0.867736	GE2	1	45	3	sim	Lsim	Lateral	2	3
3	f	0	18	7	0.452076	0.452076	GE2	1	45	7	4/5	i4/5	IntAnterior	3	12
3	f	0	18	8	0.120376	0.120376	GE2	1	45	7	sim	isim	IntPosterior	4	7
3	f	0	18	9	0.115789	0.115789	GE2	1	45	7	sim	isim	IntPosterior	4	7
3	f	0	18	10	0.159925	0.159925	GE2	1	45	11	2	m2	MedAnterior	5	13
3	f	0	18	11	#DIV/0!		GE2	1	45	11	3	m3	MedAnterior	5	14
3	f	0	18	12	0.241245	0.241245	GE2	1	45	11	3	m3	MedAnterior	5	14
3	f	0	18	13	0.124671	0.124671	GE2	1	45	11	4/5	m4/5	MedAnterior	5	15
3	f	0	18	14	0.127148	0.127148	GE2	1	45	11	4/5	m4/5	MedAnterior	5	15
3	f	0	18	15	0.0994541	0.0994541	GE2	1	45	11	4/5	m4/5	MedAnterior	5	15
3	f	0	18	16	0.109432	0.109432	GE2	1	45	11	6	m6	MedPosterior	6	16
3	f	0	18	17	0.0953323	0.0953323	GE2	1	45	11	6	m6	MedPosterior	6	16
3	f	0	18	18	#DIV/0!		GE2	1	45	11	7	m7	MedPosterior	6	17
3	f	0	18	19	0.123909	0.123909	GE2	1	45	11	8	m8	MedPosterior	6	18
3	f	0	18	20	0.132095	0.132095	GE2	1	45	11	8	m8	MedPosterior	6	18
3	f	0	18	21	0.0484874	0.0484874	GE2	1	45	11	9	m9	MedPosterior	6	19
3	f	0	18	22	0.096331	0.096331	GE2	1	45	11	9	m9	MedPosterior	6	19
3	f	0	18	23	0.077645	0.077645	GE2	1	45	11	10	m10	MedPosterior	6	20
3	m	1	19	200429_2563	0.135142	0.135142	GE3	2	120	3	crus1	Lcrus1	Lateral	2	4
3	m	1	19		#DIV/0!		GE3	2	120	3	crus2	Lcrus2	Lateral	2	5
3	m	1	19		#DIV/0!		GE3	2	120	3
3	m	1	19		0.820979	0.820979	GE3	2	120	3	crus2	Lcrus2	Lateral	2	5
3	m	1	19		0.0853696	0.0853696	GE3	2	120	3	fl	Lfl	Vestibular	1	2
3	m	1	19		0.174214	0.174214	GE3	2	120	6	4/5	i4/5	IntAnterior	3	12
3	m	1	19		0.12083	0.12083	GE3	2	120	6	sim	isim	IntPosterior	4	7
3	m	1	19		0.215743	0.215743	GE3	2	120	6	crus1	icrus1	IntPosterior	4	8
3	m	1	19		0.212051	0.212051	GE3	2	120	6	crus1	icrus1	IntPosterior	4	8
3	m	1	19		#DIV/0!		GE3	2	120	6	crus2	icrus2	IntPosterior	4	9
3	m	1	19		0.132623	0.132623	GE3	2	120	6	crus2	icrus2	IntPosterior	4	9
3	m	1	19		0.133678	0.133678	GE3	2	120	6	pm	ipm	IntPosterior	4	10
3	m	1	19		0.127963	0.127963	GE3	2	120	6	cop	icop	IntPosterior	4	11
3	m	1	19		#DIV/0!		GE3	2	120	6	cop	icop	IntPosterior	4	11
3	m	1	19		0.0800287	0.0800287	GE3	2	120	12	2	m2	MedAnterior	5	13
3	m	1	19		0.117263	0.117263	GE3	2	120	12	2	m2	MedAnterior	5	13
3	m	1	19		0.238369	0.238369	GE3	2	120	12	3	m3	MedAnterior	5	14
3	m	1	19		0.0689978	0.0689978	GE3	2	120	12	3	m3	MedAnterior	5	14
3	m	1	19		0.0927752	0.0927752	GE3	2	120	12	3	m3	MedAnterior	5	14
3	m	1	19		0.151335	0.151335	GE3	2	120	12	4/5	m4/5	MedAnterior	5	15
3	m	1	19		0.126304	0.126304	GE3	2	120	12	4/5	m4/5	MedAnterior	5	15
3	m	1	19		0.074042	0.074042	GE3	2	120	12	6	m6	MedPosterior	6	16
3	m	1	19		#DIV/0!		GE3	2	120	12	7	m7	MedPosterior	6	17
3	m	1	19		0.0846158	0.0846158	GE3	2	120	12	8	m8	MedPosterior	6	18
3	m	1	19		0.155979	0.155979	GE3	2	120	12	8	m8	MedPosterior	6	18
3	m	1	19		0.128668	0.128668	GE3	2	120	12	9	m9	MedPosterior	6	19
3	m	1	19		0.0759388	0.0759388	GE3	2	120	12	9	m9	MedPosterior	6	19
3	m	1	19		0.138444	0.138444	GE3	2	120	12	9	m9	MedPosterior	6	19
3	m	1	19		0.0536555	0.0536555	GE3	2	120	12	10	m10	MedPosterior	6	20
3	m	1	19		0.106323	0.106323	GE3	2	120	12	10	m10	MedPosterior	6	20
3	f	0	20	200507a_2311	0.289725	0.289725	GE4	3	210	3	sim	Lsim	Lateral	2	3
3	f	0	20		0.162334	0.162334	GE4	3	210	3	crus2	Lcrus2	Lateral	2	5
3	f	0	20		0.916762	0.916762	GE4	3	210	2	crus2	Lcrus2	Lateral	2	5
3	f	0	20		#DIV/0!		GE4	3	210	6	4/5	i4/5	IntAnterior	3	12
3	f	0	20		0.219708	0.219708	GE4	3	210	6	sim	isim	IntPosterior	4	7
3	f	0	20		0.0735302	0.0735302	GE4	3	210	6	crus1	icrus1	IntPosterior	4	8
3	f	0	20		0.110918	0.110918	GE4	3	210	6	crus2	icrus2	IntPosterior	4	9
3	f	0	20		0.432683	0.432683	GE4	3	210	6	pm	ipm	IntPosterior	4	10
3	f	0	20		#DIV/0!		GE4	3	210	6	cop	icop	IntPosterior	4	11
3	f	0	20		0.110191	0.110191	GE4	3	210	6	cop	icop	IntPosterior	4	11
3	f	0	20		0.0774075	0.0774075	GE4	3	210	11	2	m2	MedAnterior	5	13
3	f	0	20		0.0598997	0.0598997	GE4	3	210	11	2	m2	MedAnterior	5	13
3	f	0	20		0.116969	0.116969	GE4	3	210	11	3	m3	MedAnterior	5	14
3	f	0	20		0.168554	0.168554	GE4	3	210	11	4/5	m4/5	MedAnterior	5	15
3	f	0	20		0.204966	0.204966	GE4	3	210	11	4/5	m4/5	MedAnterior	5	15
3	f	0	20		0.171539	0.171539	GE4	3	210	11	4/5	m4/5	MedAnterior	5	15
3	f	0	20		0.243449	0.243449	GE4	3	210	11	6	m6	MedPosterior	6	16
3	f	0	20		0.0860684	0.0860684	GE4	3	210	11	6	m6	MedPosterior	6	16
3	f	0	20		#DIV/0!		GE4	3	210	11				#N/A	#N/A
3	f	0	20		0.10009	0.10009	GE4	3	210	11	7	m7	MedPosterior	6	17
3	f	0	20		0.0662529	0.0662529	GE4	3	210	11	8	m8	MedPosterior	6	18
3	f	0	20		0.132071	0.132071	GE4	3	210	11	8	m8	MedPosterior	6	18
3	f	0	20		0.104733	0.104733	GE4	3	210	11	9	m9	MedPosterior	6	19
3	f	0	20		0.0895451	0.0895451	GE4	3	210	11	9	m9	MedPosterior	6	19
3	f	0	20		0.081536	0.081536	GE4	3	210	11	9	m9	MedPosterior	6	19
3	f	0	20		0.147822	0.147822	GE4	3	210	11	10	m10	MedPosterior	6	20
3	f	0	20		0.0611355	0.0611355	GE4	3	210	11	10	m10	MedPosterior	6	20
3	f	0	21	200507b_2314	1.08572	1.08572	GE4	3	210	3	fl	Lfl	Vestibular	1	2
3	f	0	21	2	0.66967	0.66967	GE4	3	210	3	pfl	Lpfl	Vestibular	1	1
3	f	0	21	3	#DIV/0!		GE4	3	210	3	pfl	Lpfl	Vestibular	1	1
3	f	0	21	4	#DIV/0!		GE4	3	210	3	crus2	Lcrus2	Lateral	2	5
3	f	0	21	5	0.387847	0.387847	GE4	3	210	3	crus2	Lcrus2	Lateral	2	5
3	f	0	21	6	0.812376	0.812376	GE4	3	210	3	crus1	Lcrus1	Lateral	2	4
3	f	0	21	7	0.740555	0.740555	GE4	3	210	6	sim	isim	IntPosterior	4	7
3	f	0	21	8	0.744138	0.744138	GE4	3	210	6	sim	isim	IntPosterior	4	7
3	f	0	21	9	0.123121	0.123121	GE4	3	210	6	crus1	icrus1	IntPosterior	4	8
3	f	0	21	10	0.0899615	0.0899615	GE4	3	210	6	pm	ipm	IntPosterior	4	10
3	f	0	21	12	#DIV/0!		GE4	3	210	11	2	m2	MedAnterior	5	13
3	f	0	21	13	0.132004	0.132004	GE4	3	210	11	2	m2	MedAnterior	5	13
3	f	0	21	14	0.13059	0.13059	GE4	3	210	11	3	m3	MedAnterior	5	14
3	f	0	21	15	0.207482	0.207482	GE4	3	210	11	3	m3	MedAnterior	5	14
3	f	0	21	16	0.0963273	0.0963273	GE4	3	210	11	4/5	m4/5	MedAnterior	5	15
3	f	0	21	17	0.101755	0.101755	GE4	3	210	11	4/5	m4/5	MedAnterior	5	15
3	f	0	21	18	#DIV/0!		GE4	3	210	11	4/5	m4/5	MedAnterior	5	15
3	f	0	21	19	0.230829	0.230829	GE4	3	210	11	6	m6	MedPosterior	6	16
3	f	0	21	20	0.174769	0.174769	GE4	3	210	11	6	m6	MedPosterior	6	16
3	f	0	21	21	0.0839017	0.0839017	GE4	3	210	11	7	m7	MedPosterior	6	17
3	f	0	21	22	0.0784355	0.0784355	GE4	3	210	11	8	m8	MedPosterior	6	18
3	f	0	21	23	0.154134	0.154134	GE4	3	210	11	8	m8	MedPosterior	6	18
3	f	0	21	24	0.135536	0.135536	GE4	3	210	11	9	m9	MedPosterior	6	19
3	f	0	21	25	0.154642	0.154642	GE4	3	210	11	9	m9	MedPosterior	6	19
3	f	0	21	26	0.0804676	0.0804676	GE4	3	210	11	9	m9	MedPosterior	6	19
3	f	0	21	27	0.0588861	0.0588861	GE4	3	210	11	10	m10	MedPosterior	6	20
3	f	0	21	28	0.0566905	0.0566905	GE4	3	210	11	10	m10	MedPosterior	6	20
3	m	1	22	200528_1658	0.164643	0.164643	GE1	4	400	2	pfl	Lpfl	Vestibular	1	1				#NAME?
3	m	1	22		0.211313	0.211313	GE1	4	400	2	fl	Lfl	Vestibular	1	2
3	m	1	22		0.0835657	0.0835657	GE1	4	400	3	fl	Lfl	Vestibular	1	2
3	m	1	22		0.108541	0.108541	GE1	4	400	3	fl	Lfl	Vestibular	1	2
3	m	1	22		1.4562	1.4562	GE1	4	400	3	pfl	Lpfl	Vestibular	1	1
3	m	1	22		#DIV/0!		GE1	4	400	3	pm	Lpm	Lateral
3	m	1	22		0.197349	0.197349	GE1	4	400	3	pm	Lpm	Lateral	2	6
3	m	1	22		#DIV/0!		GE1	4	400	3	crus2	Lcrus2	Lateral
3	m	1	22		0.135159	0.135159	GE1	4	400	3	crus2	Lcrus2	Lateral	2	5
3	m	1	22		0.158179	0.158179	GE1	4	400	3	crus1	Lcrus1	Lateral	2	4
3	m	1	22		0.331039	0.331039	GE1	4	400	3	crus1	Lcrus1	Lateral	2	4
3	m	1	22		0.434238	0.434238	GE1	4	400	3	sim	Lsim	Lateral	2	3
3	m	1	22		0.257598	0.257598	GE1	4	400	6	cop	icop	IntPosterior	4	11
3	m	1	22		0.14125	0.14125	GE1	4	400	6	pm	ipm	IntPosterior	4	10
3	m	1	22		0.163443	0.163443	GE1	4	400	6	crus2	icrus2	IntPosterior	4	9
3	m	1	22		0.149672	0.149672	GE1	4	400	6	crus1	icrus1	IntPosterior	4	8
3	m	1	22		0.329788	0.329788	GE1	4	400	6	4/5	i4/5	IntAnterior	3	12
3	m	1	22		0.0713045	0.0713045	GE1	4	400	12	2	m2	MedAnterior	5	13
3	m	1	22		0.118486	0.118486	GE1	4	400	12	2	m2	MedAnterior	5	13
3	m	1	22		0.0931894	0.0931894	GE1	4	400	12	3	m3	MedAnterior	5	14
3	m	1	22		0.0749675	0.0749675	GE1	4	400	12	3	m3	MedAnterior	5	14
3	m	1	22		0.104632	0.104632	GE1	4	400	12	3	m3	MedAnterior	5	14
3	m	1	22		0.0994876	0.0994876	GE1	4	400	12	4/5	m4/5	MedAnterior	5	15
3	m	1	22		0.101358	0.101358	GE1	4	400	12	4/5	m4/5	MedAnterior	5	15
3	m	1	22		0.108148	0.108148	GE1	4	400	12	4/5	m4/5	MedAnterior	5	15
3	m	1	22		0.100353	0.100353	GE1	4	400	12	6	m6	MedPosterior	6	16
3	m	1	22		0.0854354	0.0854354	GE1	4	400	12	6	m6	MedPosterior	6	16
3	m	1	22		#DIV/0!		GE1	4	400	12	7	m7	MedPosterior
3	m	1	22		0.148402	0.148402	GE1	4	400	12	8	m8	MedPosterior	6	18
3	m	1	22		0.105717	0.105717	GE1	4	400	12	8	m8	MedPosterior	6	18
3	m	1	22		0.101302	0.101302	GE1	4	400	12	9	m9	MedPosterior	6	19
3	m	1	22		0.101302	0.101302	GE1	4	400	12	9	m9	MedPosterior	6	19
3	m	1	22		0.0664232	0.0664232	GE1	4	400	12	9	m9	MedPosterior	6	19
3	m	1	22		0.0635392	0.0635392	GE1	4	400	12	10	m10	MedPosterior	6	20
3	m	1	22		0.0567421	0.0567421	GE1	4	400	12	10	m10	MedPosterior	6	20
3	m	1	22		0.0647196	0.0647196	GE1	4	400	12	10	m10	MedPosterior	6	20
3	m	1	23	200713_2697	0.154472	0.154472	GE3	2	120	3	sim	Lsim	Lateral	2	3
3	m	1	23		0.111522	0.111522	GE3	2	120	3	sim	Lsim	Lateral	2	3
3	m	1	23		#DIV/0!		GE3	2	120	3	crus1	Lcrus1	Lateral	2	4
3	m	1	23		0.563058	0.563058	GE3	2	120	3	crus2	Lcrus2	Lateral	2	5
3	m	1	23		0.210068	0.210068	GE3	2	120	6	sim	isim	IntPosterior	4	7
3	m	1	23		#DIV/0!		GE3	2	120	6	sim	isim	IntPosterior	4	7
3	m	1	23		0.638954	0.638954	GE3	2	120	6	crus2	icrus2	IntPosterior	4	9
3	m	1	23		0.0841319	0.0841319	GE3	2	120	6	pm	ipm	IntPosterior	4	10
3	m	1	23		#DIV/0!		GE3	2	120	6	pm	ipm	IntPosterior	4	10
3	m	1	23		0.0748034	0.0748034	GE3	2	120	12	2	m2	MedAnterior	5	13
3	m	1	23		0.0977281	0.0977281	GE3	2	120	12	2	m2	MedAnterior	5	13
3	m	1	23		0.0729913	0.0729913	GE3	2	120	12	3	m3	MedAnterior	5	14
3	m	1	23		0.105043	0.105043	GE3	2	120	12	3	m3	MedAnterior	5	14
3	m	1	23		0.489313	0.489313	GE3	2	120	12	3	m3	MedAnterior	5	14
3	m	1	23		0.0830217	0.0830217	GE3	2	120	12	4/5	m4/5	MedAnterior	5	15
3	m	1	23		0.0569896	0.0569896	GE3	2	120	12	4/5	m4/5	MedAnterior	5	15
3	m	1	23		0.15216	0.15216	GE3	2	120	12	4/5	m4/5	MedAnterior	5	15
3	m	1	23		0.106136	0.106136	GE3	2	120	12	6	m6	MedPosterior	6	16
3	m	1	23		0.041467	0.041467	GE3	2	120	12	6	m6	MedPosterior	6	16
3	m	1	23		0.0699126	0.0699126	GE3	2	120	12	6	m6	MedPosterior	6	16
3	m	1	23		0.0745417	0.0745417	GE3	2	120	12	7	m7	MedPosterior	6	17
3	m	1	23		0.0735331	0.0735331	GE3	2	120	12	8	m8	MedPosterior	6	18
3	m	1	23		0.0693081	0.0693081	GE3	2	120	12	8	m8	MedPosterior	6	18
3	m	1	23		0.094409	0.094409	GE3	2	120	12	9	m9	MedPosterior	6	19
3	m	1	23		0.0522654	0.0522654	GE3	2	120	12	9	m9	MedPosterior	6	19
3	m	1	23		0.0864774	0.0864774	GE3	2	120	12	9	m9	MedPosterior	6	19
3	m	1	23		0.127583	0.127583	GE3	2	120	12	10	m10	MedPosterior	6	20
3	m	1	23		0.143744	0.143744	GE3	2	120	12	10	m10	MedPosterior	6	20
3	m	1	24	200714a_1915	#DIV/0!		GE1	4	400	2	fl	Lfl	Vestibular	1	2
3	m	1	24		0.0956364	0.0956364	GE1	4	400	2	fl	Lfl	Vestibular	1	2
3	m	1	24		0.223725	0.223725	GE1	4	400	2	pfl	Lpfl	Vestibular	1	1
3	m	1	24		0.267826	0.267826	GE1	4	400	2	pfl	Lpfl	Vestibular	1	1
3	m	1	24		0.0779409	0.0779409	GE1	4	400	3	pfl	Lpfl	Vestibular	1	1
3	m	1	24		0.0976775	0.0976775	GE1	4	400	3	fl	Lfl	Vestibular	1	2
3	m	1	24		0.167468	0.167468	GE1	4	400	3	crus2	Lcrus2	Lateral	2	5
3	m	1	24		0.0954938	0.0954938	GE1	4	400	3	crus1	Lcrus1	Lateral	2	4
3	m	1	24		0.137296	0.137296	GE1	4	400	6	sim	isim	IntPosterior	4	7
3	m	1	24		0.0744836	0.0744836	GE1	4	400	6	crus2	icrus2	IntPosterior	4	9
3	m	1	24		0.130239	0.130239	GE1	4	400	6	pm	ipm	IntPosterior	4	10
3	m	1	24		0.106463	0.106463	GE1	4	400	6	pm	ipm	IntPosterior	4	10
3	m	1	24		0.0728535	0.0728535	GE1	4	400	7	sim	isim	IntPosterior	4	7
3	m	1	24		0.078463	0.078463	GE1	4	400	7	crus1	icrus1	IntPosterior	4	8
3	m	1	24		0.104159	0.104159	GE1	4	400	7	crus2	icrus2	IntPosterior	4	9
3	m	1	24		0.0464715	0.0464715	GE1	4	400	7	cop	icop	IntPosterior	4	11
3	m	1	24		0.0765613	0.0765613	GE1	4	400	11	2	m2	MedAnterior	5	13
3	m	1	24		0.12745	0.12745	GE1	4	400	11	2	m2	MedAnterior	5	13
3	m	1	24		0.139674	0.139674	GE1	4	400	11	3	m3	MedAnterior	5	14
3	m	1	24		0.0773329	0.0773329	GE1	4	400	11	3	m3	MedAnterior	5	14
3	m	1	24		0.0792616	0.0792616	GE1	4	400	11	3	m3	MedAnterior	5	14
3	m	1	24		0.216885	0.216885	GE1	4	400	11	4/5	m4/5	MedAnterior	5	15
3	m	1	24		0.153758	0.153758	GE1	4	400	11	4/5	m4/5	MedAnterior	5	15
3	m	1	24		0.104679	0.104679	GE1	4	400	11	6	m6	MedPosterior	6	16
3	m	1	24		0.218211	0.218211	GE1	4	400	11	7	m7	MedPosterior	6	17
3	m	1	24		0.181446	0.181446	GE1	4	400	11	7	m7	MedPosterior	6	17
3	m	1	24		0.0362639	0.0362639	GE1	4	400	11	8	m8	MedPosterior	6	18
3	m	1	24		0.0678176	0.0678176	GE1	4	400	11	8	m8	MedPosterior	6	18
3	m	1	24		0.202914	0.202914	GE1	4	400	11	9	m9	MedPosterior	6	19
3	m	1	24		0.120185	0.120185	GE1	4	400	11	9	m9	MedPosterior	6	19
3	m	1	24		0.051794	0.051794	GE1	4	400	11	9	m9	MedPosterior	6	19
3	m	1	24		0.0712912	0.0712912	GE1	4	400	11	10	m10	MedPosterior	6	20
3	m	1	24		0.04968	0.04968	GE1	4	400	11	10	m10	MedPosterior	6	20
3	f	0	25	200714b_1875	0.73278	0.73278	GE1	4	400	3	pfl	Lpfl	Vestibular	1	1
3	f	0	25	2	0.143325	0.143325	GE1	4	400	3	fl	Lfl	Vestibular	1	2
3	f	0	25	3	0.291285	0.291285	GE1	4	400	3	crus1	Lcrus1	Lateral	2	4
3	f	0	25	4	0.311641	0.311641	GE1	4	400	3	crus1	Lcrus1	Lateral	2	4
3	f	0	25	5	0.311641	0.311641	GE1	4	400	3	crus2	Lcrus2	Lateral	2	5
3	f	0	25	6	0.449251	0.449251	GE1	4	400	3	pm	Lpm	Lateral	2	6
3	f	0	25	7	0.149293	0.149293	GE1	4	400	3	cop	Lcop	#N/A	#N/A	#N/A
3	f	0	25	8	0.235807	0.235807	GE1	4	400	6	4/5	i4/5	IntAnterior	3	12
3	f	0	25	9	0.118225	0.118225	GE1	4	400	6	sim	isim	IntPosterior	4	7
3	f	0	25	10	0.636783	0.636783	GE1	4	400	6	sim	isim	IntPosterior	4	7
3	f	0	25	11	0.0840357	0.0840357	GE1	4	400	6	crus1	icrus1	IntPosterior	4	8
3	f	0	25	12	0.124555	0.124555	GE1	4	400	6	crus2	icrus2	IntPosterior	4	9
3	f	0	25	13	0.11094	0.11094	GE1	4	400	6	pm	ipm	IntPosterior	4	10
3	f	0	25	14	0.251206	0.251206	GE1	4	400	6	cop	icop	IntPosterior	4	11
3	f	0	25	15	0.0635279	0.0635279	GE1	4	400	12	2	m2	MedAnterior	5	13
3	f	0	25	16	0.124517	0.124517	GE1	4	400	12	2	m2	MedAnterior	5	13
3	f	0	25	17	0.151297	0.151297	GE1	4	400	12	3	m3	MedAnterior	5	14
3	f	0	25	18	0.0716934	0.0716934	GE1	4	400	12	3	m3	MedAnterior	5	14
3	f	0	25	19	0.156535	0.156535	GE1	4	400	12	3	m3	MedAnterior	5	14
3	f	0	25	20	0.0817034	0.0817034	GE1	4	400	12	4/5	m4/5	MedAnterior	5	15
3	f	0	25	21	0.145669	0.145669	GE1	4	400	12	4/5	m4/5	MedAnterior	5	15
3	f	0	25	22	0.145669	0.145669	GE1	4	400	12	4/5	m4/5	MedAnterior	5	15
3	f	0	25	23	0.228161	0.228161	GE1	4	400	12	6	m6	MedPosterior	6	16
3	f	0	25	24	0.0738667	0.0738667	GE1	4	400	12	6	m6	MedPosterior	6	16
3	f	0	25	25	0.0701497	0.0701497	GE1	4	400	12	7	m7	MedPosterior	6	17
3	f	0	25	26	0.0782994	0.0782994	GE1	4	400	12	8	m8	MedPosterior	6	18
3	f	0	25	27	0.149728	0.149728	GE1	4	400	12	8	m8	MedPosterior	6	18
3	f	0	25	28	0.175052	0.175052	GE1	4	400	12	9	m9	MedPosterior	6	19
3	f	0	25	29	0.0604077	0.0604077	GE1	4	400	12	9	m9	MedPosterior	6	19
3	f	0	25	30	0.0629739	0.0629739	GE1	4	400	12	10	m10	MedPosterior	6	20
3	f	0	25	31	0.0540843	0.0540843	GE1	4	400	12	10	m10	MedPosterior	6	20
3	f	0	25	32	0.052033	0.052033	GE1	4	400	12	10	m10	MedPosterior	6	20
3	m	1	26	200715_1917	0.0935014	0.0935014	GE1	4	400	2	pfl	Lpfl	Vestibular	1	1
3	m	1	26	2	0.304807	0.304807	GE1	4	400	2	fl	Lfl	Vestibular	1	2
3	m	1	26	3	0.0637648	0.0637648	GE1	4	400	2	pfl	Lpfl	Vestibular	1	1
3	m	1	26	4	0.0958915	0.0958915	GE1	4	400	2	fl	Lfl	Vestibular	1	2
3	m	1	26	5	0.330583	0.330583	GE1	4	400	2	sim	Lsim	Lateral	2	3
3	m	1	26	6	0.369812	0.369812	GE1	4	400	2	crus1	Lcrus1	Lateral	2	4
3	m	1	26	7	0.128597	0.128597	GE1	4	400	2	crus1	Lcrus1	Lateral	2	4
3	m	1	26	8	0.24003	0.24003	GE1	4	400	2	crus2	Lcrus2	Lateral	2	5
3	m	1	26	9	#DIV/0!		GE1	4	400	2	crus2	Lcrus2	Lateral	2	5
3	m	1	26	10	0.257811	0.257811	GE1	4	400	2	pm	Lpm	Lateral	2	6
3	m	1	26	11	#DIV/0!		GE1	4	400	6	cop	icop	IntPosterior	4	11
3	m	1	26	12	0.159318	0.159318	GE1	4	400	6	cop	icop	IntPosterior	4	11
3	m	1	26	13	0.110671	0.110671	GE1	4	400	6	pm	ipm	IntPosterior	4	10
3	m	1	26	14	0.136557	0.136557	GE1	4	400	6	pm	ipm	IntPosterior	4	10
3	m	1	26	15	0.0810206	0.0810206	GE1	4	400	6	crus2	icrus2	IntPosterior	4	9
3	m	1	26	16	0.0751887	0.0751887	GE1	4	400	6	sim	isim	IntPosterior	4	7
3	m	1	26	17	0.859767	0.859767	GE1	4	400	6	4/5	i4/5	IntAnterior	3	12
3	m	1	26	18	0.325857	0.325857	GE1	4	400	6	4/5	i4/5	IntAnterior	3	12
3	m	1	26	19	0.0847151	0.0847151	GE1	4	400	12	2	m2	MedAnterior	5	13
3	m	1	26	20	0.080978	0.080978	GE1	4	400	12	2	m2	MedAnterior	5	13
3	m	1	26	21	0.0605067	0.0605067	GE1	4	400	12	3	m3	MedAnterior	5	14
3	m	1	26	22	0.0972797	0.0972797	GE1	4	400	12	3	m3	MedAnterior	5	14
3	m	1	26	23	0.1074	0.1074	GE1	4	400	12	3	m3	MedAnterior	5	14
3	m	1	26	24	0.257038	0.257038	GE1	4	400	12	4/5	m4/5	MedAnterior	5	15
3	m	1	26	25	0.119668	0.119668	GE1	4	400	12	4/5	m4/5	MedAnterior	5	15
3	m	1	26	26	0.146498	0.146498	GE1	4	400	12	4/5	m4/5	MedAnterior	5	15
3	m	1	26	27	0.0607278	0.0607278	GE1	4	400	12	6	m6	MedPosterior	6	16
3	m	1	26	28	0.087096	0.087096	GE1	4	400	12	6	m6	MedPosterior	6	16
3	m	1	26	29	0.178226	0.178226	GE1	4	400	12	6	m6	MedPosterior	6	16
3	m	1	26	30	0.0850888	0.0850888	GE1	4	400	12	7	m7	MedPosterior	6	17
3	m	1	26	31	0.047676	0.047676	GE1	4	400	12	7	m7	MedPosterior	6	17
3	m	1	26	32	0.0921494	0.0921494	GE1	4	400	12	8	m8	MedPosterior	6	18
3	m	1	26	33	0.0800872	0.0800872	GE1	4	400	12	8	m8	MedPosterior	6	18
3	m	1	26	34	0.0683657	0.0683657	GE1	4	400	12	9	m9	MedPosterior	6	19
3	m	1	26	35	0.036979	0.036979	GE1	4	400	12	9	m9	MedPosterior	6	19
3	m	1	26	36	0.0714176	0.0714176	GE1	4	400	12	9	m9	MedPosterior	6	19
3	m	1	26	37	0.088693	0.088693	GE1	4	400	12	10	m10	MedPosterior	6	20
3	m	1	26	38	0.0548293	0.0548293	GE1	4	400	12	10	m10	MedPosterior	6	20
3	m	1	26	39	0.0545331	0.0545331	GE1	4	400	12	10	m10	MedPosterior	6	20

## Sheet: AtmWt Wt; Aptx- -
AtmWt/Wt; Aptx-/-			Total # of animals	30
Genotype	sex	sex code (1=m)	sex code (1=m)	Exp. Date_Animal ID	Average frequency	Average frequency	Group	Age	Age days	slice	folia	Position name	Region name	Gross Region ID	Position ID								1-5 vs 6-10
4	m	1	1	190417_1386	0.182546	0.182546	GE2	1	45	4	pfl	Lpfl	Vestibular	1	1		All time points												m					f
4	m	1	1	2	0.246069	0.246069	GE2	1	45	4	pfl	Lpfl	Vestibular	1	1		By Position ID	average	stdev	n	sem		By major regions	average	stdev	n	sem		average	stdev	n	sem		average	stdev	n	sem
4	m	1	1	3	0.367435	0.367435	GE2	1	45	4	pm	Lpm	Lateral	2	6		Lpfl	0.235442	0.141688	10	0.0448057	1	Vestibular	0.192057	0.172149	15	0.0444487	1	0.118821	0.0710628	7	0.0268592		0.304153	0.191372	8	0.0676602
4	m	1	1	4	0.27876	0.27876	GE2	1	45	4	crus2	Lcrus2	Lateral	2	5		Lfl	0.182111	0.237031	5	0.106003	2	Lateral	0.295067	0.441515	96	0.0450619	2	0.310876	0.240804	49	0.0344005		0.431698	0.578328	47	0.0843578
4	m	1	1	5	0.115048	0.115048	GE2	1	45	4	crus2	Lcrus2	Lateral	2	5		Lsim	0.53348	0.519376	20	0.116136	3	IntAnterior	0.233324	0.258561	28	0.0488634	3	0.173053	0.13866	11	0.0418077		0.331341	0.300567	17	0.0728983
4	m	1	1	6	0.150419	0.150419	GE2	1	45	4	crus2	Lcrus2	Lateral	2	5		Lcrus1	0.289663	0.190092	27	0.0365832	4	IntPosterior	0.360373	1.63317	109	0.156429	4	0.494204	2.22747	57	0.295036		0.282977	0.42001	52	0.0582449
4	m	1	1	7	0.212333	0.212333	GE2	1	45	4	crus2	Lcrus2	Lateral	2	5		Lcrus2	0.410432	0.551867	40	0.0872579	5	MedAnterior	0.147023	0.101578	245	0.0064896	5	0.151343	0.116614	125	0.0104302		0.137144	0.0829622	120	0.00757338
4	m	1	1	8	0.143252	0.143252	GE2	1	45	4	crus1	Lcrus1	Lateral	2	4		Lpm	0.206429	0.109485	11	0.0330109	6	MedPosterior	0.112696	0.106779	295	0.0062169	6	0.11468	0.104715	147	0.00863673		0.115773	0.109143	148	0.0089715
4	m	1	1	9	#DIV/0!		GE2	1	45	4	sim	Lsim		#N/A	3		isim	0.15666	0.111648	21	0.0243635	7
4	m	1	1	10	0.0755972	0.0755972	GE2	1	45	7	cop	icop	IntPosterior	4	11		icrus1	0.922528	3.32964	25	0.665928	8
4	m	1	1	11	0.0886803	0.0886803	GE2	1	45	7	cop	icop	IntPosterior	4	11		icrus2	0.171648	0.0798308	24	0.0162954	9
4	m	1	1	12	0.0739458	0.0739458	GE2	1	45	7	pm	ipm	IntPosterior	4	10		ipm	0.380635	0.735412	21	0.16048	10
4	m	1	1	13	0.0572506	0.0572506	GE2	1	45	7	pm	ipm	IntPosterior	4	10		icop	0.24547	0.244808	18	0.0577019	11
4	m	1	1	14	0.111494	0.111494	GE2	1	45	7	pm	ipm	IntPosterior	4	10		i4/5	0.289322	0.266903	25	0.0533805	12
4	m	1	1	15	0.152458	0.152458	GE2	1	45	7	crus2	icrus2	IntPosterior	4	9		m2	0.115317	0.0653346	67	0.00798189	13
4	m	1	1	16	0.154331	0.154331	GE2	1	45	7	crus1	icrus1	IntPosterior	4	8		m3	0.173983	0.175416	82	0.0193714	14
4	m	1	1	17	0.0670351	0.0670351	GE2	1	45	7	sim	isim	IntPosterior	4	7		m4/5	0.153574	0.121378	99	0.012199	15
4	m	1	1	18	0.100805	0.100805	GE2	1	45	7	sim	isim	IntPosterior	4	7		m6	0.116872	0.057275	66	0.00705007	16
4	m	1	1	19	0.172768	0.172768	GE2	1	45	7	sim	isim	IntPosterior	4	7		m7	0.149611	0.147266	31	0.0264497	17
4	m	1	1	20	0.0778425	0.0778425	GE2	1	45	10	10	m10	MedPosterior	6	20		m8	0.113906	0.0916557	54	0.0124728	18
4	m	1	1	21	0.126271	0.126271	GE2	1	45	10	10	m10	MedPosterior	6	20		m9	0.108415	0.103162	81	0.0114624	19
4	m	1	1	22	0.211573	0.211573	GE2	1	45	10	10	m10	MedPosterior	6	20		m10	0.108992	0.136367	64	0.0170459	20
4	m	1	1	23	0.118558	0.118558	GE2	1	45	10	9	m9	MedPosterior	6	19
4	m	1	1	24	0.125814	0.125814	GE2	1	45	10	9	m9	MedPosterior	6	19
4	m	1	1	25	0.157854	0.157854	GE2	1	45	10	9	m9	MedPosterior	6	19
4	m	1	1	26	0.0536397	0.0536397	GE2	1	45	10	9	m9	MedPosterior	6	19
4	m	1	1	27	0.110862	0.110862	GE2	1	45	10	9	m9	MedPosterior	6	19
4	m	1	1	28	0.119091	0.119091	GE2	1	45	10	8	m8	MedPosterior	6	18
4	m	1	1	29	0.0696775	0.0696775	GE2	1	45	10	8	m8	MedPosterior	6	18
4	m	1	1	30	0.0860867	0.0860867	GE2	1	45	10	8	m8	MedPosterior	6	18
4	m	1	1	31	#DIV/0!		GE2	1	45	10	7	m7		#N/A	17
4	m	1	1	32	0.0832343	0.0832343	GE2	1	45	10	6	m6	MedPosterior	6	16
4	m	1	1	33	0.234491	0.234491	GE2	1	45	10	6	m6	MedPosterior	6	16
4	m	1	1	34	0.151429	0.151429	GE2	1	45	10	6	m6	MedPosterior	6	16
4	m	1	1	35	0.175408	0.175408	GE2	1	45	10	4/5	m4/5	MedAnterior	5	15
4	m	1	1	36	0.0613234	0.0613234	GE2	1	45	10	4/5	m4/5	MedAnterior	5	15
4	m	1	1	37	0.0871361	0.0871361	GE2	1	45	10	4/5	m4/5	MedAnterior	5	15
4	m	1	1	38	0.1118	0.1118	GE2	1	45	10	4/5	m4/5	MedAnterior	5	15
4	m	1	1	39	0.237814	0.237814	GE2	1	45	10	3	m3	MedAnterior	5	14
4	m	1	1	40	0.0740239	0.0740239	GE2	1	45	10	3	m3	MedAnterior	5	14
4	m	1	1	41	0.218152	0.218152	GE2	1	45	10	3	m3	MedAnterior	5	14		GE2	45 days	N	8									m					f
4	m	1	1	42	0.18952	0.18952	GE2	1	45	10	3	m3	MedAnterior	5	14		By Position ID	average	stdev	n	sem		By major regions	average	stdev	n	sem		average	stdev	n	sem		average	stdev	n	sem
4	m	1	1	43	0.169145	0.169145	GE2	1	45	10	3	m3	MedAnterior	5	14		Lpfl	0.230252	0.0420888	3	0.0243		Vestibular	0.230252	0.0420888	3	0.0243		0.214307	0.0449174	2	0.0317614		0.262141	#DIV/0!	1	#DIV/0!
4	m	1	1	44	0.17796	0.17796	GE2	1	45	10	2	m2	MedAnterior	5	13		Lfl	#DIV/0!	#DIV/0!	0	#DIV/0!		Lateral	0.294096	0.210174	36	0.0350289		0.271158	#N/A	16	#N/A		0.312447	#N/A	20	#N/A
4	m	1	1	45	0.258741	0.258741	GE2	1	45	10	2	m2	MedAnterior	5	13		Lsim	0.541931	0.362413	9	0.120804		IntAnterior	0.189709	0.124155	17	0.030112		0.18889	#N/A	6	#N/A		0.190155	#N/A	11	#N/A
4	m	1	1	46	0.0685891	0.0685891	GE2	1	45	10	2	m2	MedAnterior	5	13		Lcrus1	0.251828	0.120002	11	0.0361818		IntPosterior	0.176636	0.155222	42	0.0239512		0.184977	#N/A	23	#N/A		0.166539	#N/A	19	#N/A
4	m	1	1	47	0.0940078	0.0940078	GE2	1	45	10	2	m2	MedAnterior	5	13		Lcrus2	0.254788	0.206587	15	0.0533406		MedAnterior	0.158325	0.1439	70	0.0171993		0.175823	#N/A	42	#N/A		0.132077	#N/A	28	#N/A
4	f	0	2	190418_1442	0.283439	0.283439	GE2	1	45	3	sim	Lsim	Lateral	2	3		Lpm	0.25798	0.155748	3	0.0899211		MedPosterior	0.110843	0.0667887	97	0.00678136		0.114632	#N/A	54	#N/A		0.106086	#N/A	43	#N/A
4	f	0	2	2	0.38032	0.38032	GE2	1	45	3	sim	Lsim	Lateral	2	3		isim	0.115928	0.0414659	10	0.0131127
4	f	0	2	3	0.755104	0.755104	GE2	1	45	3	sim	Lsim	Lateral	2	3		icrus1	0.21891	0.178591	8	0.0631415
4	f	0	2	4	0.872892	0.872892	GE2	1	45	3	sim	Lsim	Lateral	2	3		icrus2	0.203101	0.0897539	6	0.0366419
4	f	0	2	5	0.348996	0.348996	GE2	1	45	3	crus1	Lcrus1	Lateral	2	4		ipm	0.170064	0.215096	7	0.0812987
4	f	0	2	6	0.421273	0.421273	GE2	1	45	3	crus1	Lcrus1	Lateral	2	4		icop	0.190828	0.193224	11	0.0582593
4	f	0	2	7	#DIV/0!		GE2	1	45	3	crus1	Lcrus1		#N/A	4		i4/5	0.208694	0.129365	14	0.0345743
4	f	0	2	8	0.429093	0.429093	GE2	1	45	3	crus1	Lcrus1	Lateral	2	4		m2	0.121435	0.058704	16	0.014676
4	f	0	2	9	#DIV/0!		GE2	1	45	3	crus1	Lcrus1		#N/A	4		m3	0.208782	0.283482	25	0.0566964
4	f	0	2	10	0.152028	0.152028	GE2	1	45	3	crus2	Lcrus2	Lateral	2	5		m4/5	0.179431	0.192416	32	0.0340147
4	f	0	2	11	#DIV/0!		GE2	1	45	3	crus2	Lcrus2	Lateral	2	5		m6	0.12214	0.0604443	21	0.01319
4	f	0	2	12	0.249214	0.249214	GE2	1	45	3	crus2	Lcrus2	Lateral	2	5		m7	0.112749	0.0489846	9	0.0163282
4	f	0	2	13	#DIV/0!		GE2	1	45	3	crus2	Lcrus2		#N/A	5		m8	0.120498	0.0815706	20	0.0182397
4	f	0	2	14	0.326832	0.326832	GE2	1	45	3	pm	Lpm	Lateral	2	6		m9	0.115558	0.0806706	27	0.0155251
4	f	0	2	15	0.111039	0.111039	GE2	1	45	7	3	i3	intanterior	3	#N/A		m10	0.0909174	0.0506272	21	0.0110478
4	f	0	2	16	0.108947	0.108947	GE2	1	45	7	3	i3	intanterior	3	#N/A
4	f	0	2	17	0.123357	0.123357	GE2	1	45	7	4/5	i4/5	IntAnterior	3	12
4	f	0	2	18	0.160968	0.160968	GE2	1	45	7	4/5	i4/5	IntAnterior	3	12
4	f	0	2	19	0.317743	0.317743	GE2	1	45	7	4/5	i4/5	IntAnterior	3	12
4	f	0	2	20	0.171343	0.171343	GE2	1	45	7	4/5	i4/5	IntAnterior	3	12
4	f	0	2	21	0.157264	0.157264	GE2	1	45	7	sim	isim	IntPosterior	4	7
4	f	0	2	22	0.0825177	0.0825177	GE2	1	45	7	sim	isim	IntPosterior	4	7
4	f	0	2	23	0.111288	0.111288	GE2	1	45	7	crus2	icrus2	IntPosterior	4	9
4	f	0	2	24	0.109565	0.109565	GE2	1	45	7	pm	ipm	IntPosterior	4	10
4	f	0	2	25	0.0854507	0.0854507	GE2	1	45	7	pm	ipm	IntPosterior	4	10
4	f	0	2	26	0.318176	0.318176	GE2	1	45	7	cop	icop	IntPosterior	4	11
4	f	0	2	27	0.222279	0.222279	GE2	1	45	7	cop	icop	IntPosterior	4	11
4	f	0	2	28	0.233722	0.233722	GE2	1	45	10	10	m10	MedPosterior	6	20
4	f	0	2	29	0.140448	0.140448	GE2	1	45	10	10	m10	MedPosterior	6	20
4	f	0	2	30	0.0844694	0.0844694	GE2	1	45	10	10	m10	MedPosterior	6	20
4	f	0	2	31	0.0621875	0.0621875	GE2	1	45	10	10	m10	MedPosterior	6	20
4	f	0	2	32	0.0748198	0.0748198	GE2	1	45	10	9	m9	MedPosterior	6	19
4	f	0	2	33	0.0983387	0.0983387	GE2	1	45	10	9	m9	MedPosterior	6	19
4	f	0	2	34	0.0275504	0.0275504	GE2	1	45	10	9	m9	MedPosterior	6	19
4	f	0	2	35	0.0471245	0.0471245	GE2	1	45	10	8	m8	MedPosterior	6	18		GE3	120 days	N	8									m	N	4			f	N	4
4	f	0	2	36	0.176398	0.176398	GE2	1	45	10	8	m8	MedPosterior	6	18		By Position ID	average	stdev	n	sem		By major regions	average	stdev	n	sem		average	stdev	n	sem		average	stdev	n	sem
4	f	0	2	37	0.0730699	0.0730699	GE2	1	45	10	8	m8	MedPosterior	6	18		Lpfl	0.100783	#DIV/0!	1	#DIV/0!		Vestibular	0.100783	#DIV/0!	1	#DIV/0!		0.100783	#DIV/0!	1	#DIV/0!		#DIV/0!	#DIV/0!	0	#DIV/0!
4	f	0	2	38	0.0938843	0.0938843	GE2	1	45	10	7	m7	MedPosterior	6	17		Lfl	#DIV/0!	#DIV/0!	0	#DIV/0!		Lateral	0.267466	0.203361	26	0.0398823		0.255588	0.209981	14	0.0561198		0.281323	0.203696	12	0.0588019
4	f	0	2	39	0.0962353	0.0962353	GE2	1	45	10	6	m6	MedPosterior	6	16		Lsim	0.466104	0.29668	3	0.171288		IntAnterior	0.27461	0.260789	3	0.150567		0.120027	#DIV/0!	1	#DIV/0!		0.351902	0.316509	2	0.223806
4	f	0	2	40	0.085157	0.085157	GE2	1	45	10	6	m6	MedPosterior	6	16		Lcrus1	0.342446	0.256139	8	0.0905588		IntPosterior	0.293469	0.418509	31	0.0751665		0.30926	0.548495	16	0.137124		0.276625	0.228905	15	0.0591029
4	f	0	2	41	0.0888836	0.0888836	GE2	1	45	10	6	m6	MedPosterior	6	16		Lcrus2	0.212795	0.114163	10	0.0361014		MedAnterior	0.147734	0.0882377	63	0.0111169		0.138111	0.0860648	35	0.0145476		0.159764	0.0910004	28	0.0171975
4	f	0	2	42	0.0788595	0.0788595	GE2	1	45	10	6	m6	MedPosterior	6	16		Lpm	0.137657	0.0308819	5	0.0138108		MedPosterior	0.136671	0.155527	73	0.0182031		0.126799	0.16169	39	0.0258911		0.147996	0.149744	34	0.0256809
4	f	0	2	43	0.0771918	0.0771918	GE2	1	45	10	4/5	m4/5	MedAnterior	5	15		isim	0.359665	0.234913	2	0.166109
4	f	0	2	44	0.0553715	0.0553715	GE2	1	45	10	4/5	m4/5	MedAnterior	5	15		icrus1	0.258796	0.275596	9	0.0918653
4	f	0	2	45	0.416134	0.416134	GE2	1	45	10	4/5	m4/5	MedAnterior	5	15		icrus2	0.184152	0.0878737	9	0.0292912
4	f	0	2	46	0.0852029	0.0852029	GE2	1	45	10	3	m3	MedAnterior	5	14		ipm	0.475653	0.829063	7	0.313356
4	f	0	2	47	0.0887241	0.0887241	GE2	1	45	10	3	m3	MedAnterior	5	14		icop	0.265525	0.120072	4	0.0600358
4	f	0	2	48	1.49848	1.49848	GE2	1	45	10	3	m3		#N/A	14		i4/5	0.27461	0.260789	3	0.150567
4	f	0	2	49	0.0825597	0.0825597	GE2	1	45	10	3	m3	MedAnterior	5	14		m2	0.122542	0.0975836	16	0.0243959
4	f	0	2	50	0.0602114	0.0602114	GE2	1	45	10	2	m2	MedAnterior	5	13		m3	0.17259	0.0894471	20	0.020001
4	f	0	2	51	0.0703619	0.0703619	GE2	1	45	10	2	m2	MedAnterior	5	13		m4/5	0.144251	0.079671	27	0.0153327
4	f	0	2	52	0.120968	0.120968	GE2	1	45	10	2	m2	MedAnterior	5	13		m6	0.111855	0.0417343	16	0.0104336
4	m	1	3	190422_1445	#DIV/0!		GE2	1	45	3	pm	Lpm		#N/A	6		m7	0.175127	0.111053	10	0.0351179
4	m	1	3	2	#DIV/0!		GE2	1	45	3	crus2	Lcrus2		#N/A	5		m8	0.103352	0.0624818	11	0.018839
4	m	1	3	3	#DIV/0!		GE2	1	45	3	crus2	Lcrus2		#N/A	5		m9	0.126475	0.171879	21	0.037507
4	m	1	3	4	0.125643	0.125643	GE2	1	45	3	crus1	Lcrus1	Lateral	2	4		m10	0.176215	0.255243	15	0.0659034
4	m	1	3	5	0.312722	0.312722	GE2	1	45	3	crus1	Lcrus1	Lateral	2	4
4	m	1	3	6	0.0833415	0.0833415	GE2	1	45	7	3	i3	intanterior	3	#N/A
4	m	1	3	7	0.104673	0.104673	GE2	1	45	7	4/5	i4/5	IntAnterior	3	12
4	m	1	3	8	0.569116	0.569116	GE2	1	45	7	4/5	i4/5	IntAnterior	3	12
4	m	1	3	9	0.0818803	0.0818803	GE2	1	45	7	sim	isim	IntPosterior	4	7
4	m	1	3	10	0.0580055	0.0580055	GE2	1	45	7	crus1	icrus1	IntPosterior	4	8
4	m	1	3	11	0.0929308	0.0929308	GE2	1	45	11	10	m10	MedPosterior	6	20
4	m	1	3	12	0.053238	0.053238	GE2	1	45	11	10	m10	MedPosterior	6	20
4	m	1	3	13	0.0524221	0.0524221	GE2	1	45	11	10	m10	MedPosterior	6	20
4	m	1	3	14	0.0804242	0.0804242	GE2	1	45	11	10	m10	MedPosterior	6	20
4	m	1	3	15	0.0787549	0.0787549	GE2	1	45	11	10	m10	MedPosterior	6	20
4	m	1	3	16	0.1107	0.1107	GE2	1	45	11	9	m9	MedPosterior	6	19
4	m	1	3	17	0.0895002	0.0895002	GE2	1	45	11	9	m9	MedPosterior	6	19
4	m	1	3	18	0.0802743	0.0802743	GE2	1	45	11	9	m9	MedPosterior	6	19
4	m	1	3	19	0.0722978	0.0722978	GE2	1	45	11	9	m9	MedPosterior	6	19
4	m	1	3	20	0.128928	0.128928	GE2	1	45	11	8	m8	MedPosterior	6	18
4	m	1	3	21	0.0620332	0.0620332	GE2	1	45	11	8	m8	MedPosterior	6	18
4	m	1	3	22	0.0756579	0.0756579	GE2	1	45	11	8	m8	MedPosterior	6	18
4	m	1	3	23	0.113147	0.113147	GE2	1	45	11	8	m8	MedPosterior	6	18		GE4	210 days	N	7									m	N	3			f	N	4
4	m	1	3	24	0.0978521	0.0978521	GE2	1	45	11	7	m7	MedPosterior	6	17		By Position ID	average	stdev	n	sem		By major regions	average	stdev	n	sem		average	stdev	n	sem		average	stdev	n	sem
4	m	1	3	25	0.133644	0.133644	GE2	1	45	11	7	m7	MedPosterior	6	17		Lpfl	#DIV/0!	#DIV/0!	0	#DIV/0!		Vestibular	0.117389	#DIV/0!	1	#DIV/0!		#DIV/0!	#DIV/0!	0	#DIV/0!		0.117389	#DIV/0!	1	#DIV/0!
4	m	1	3	26	0.226971	0.226971	GE2	1	45	11	6	m6	MedPosterior	6	16		Lfl	0.117389	#DIV/0!	1	#DIV/0!		Lateral	0.631036	0.817328	19	0.187508		0.437357	0.339057	12	0.0978774		0.963056	1.26083	7	0.476547
4	m	1	3	27	0.145822	0.145822	GE2	1	45	11	6	m6	MedPosterior	6	16		Lsim	0.748167	0.9312	5	0.416446		IntAnterior	0.402006	0.347177	5	0.155262		0.147377	0.0647385	2	0.045777		0.571759	0.361811	3	0.208892
4	m	1	3	28	0.0814457	0.0814457	GE2	1	45	11	6	m6	MedPosterior	6	16		Lcrus1	0.166263	0.0962893	3	0.0555926		IntPosterior	0.148981	0.0825662	15	0.0213185		0.134512	0.0590077	8	0.0208624		0.165518	0.106049	7	0.0400827
4	m	1	3	29	0.0841885	0.0841885	GE2	1	45	11	6	m6	MedPosterior	6	16		Lcrus2	0.789696	0.961417	9	0.320472		MedAnterior	0.144342	0.0870843	61	0.01115		0.162017	0.106791	27	0.020552		0.130307	0.0659141	34	0.0113042
4	m	1	3	30	0.0770759	0.0770759	GE2	1	45	11	4/5	m4/5	MedAnterior	5	15		Lpm	0.321399	0.0884561	2	0.0625479		MedPosterior	0.0988785	0.0770409	70	0.00920815		0.115994	0.110667	29	0.0205504		0.0867723	0.0360935	41	0.00563686
4	m	1	3	31	0.123042	0.123042	GE2	1	45	11	4/5	m4/5	MedAnterior	5	15		isim	0.167686	0.134093	5	0.0599681
4	m	1	3	32	0.0739753	0.0739753	GE2	1	45	11	4/5	m4/5	MedAnterior	5	15		icrus1	0.142992	0.0607346	3	0.0350651
4	m	1	3	33	0.112536	0.112536	GE2	1	45	11	4/5	m4/5	MedAnterior	5	15		icrus2	0.128312	0.0613807	4	0.0306903
4	m	1	3	34	0.15327	0.15327	GE2	1	45	11	4/5	m4/5	MedAnterior	5	15		ipm	0.149914	0.0352406	2	0.0249188
4	m	1	3	35	0.147044	0.147044	GE2	1	45	11	4/5	m4/5	MedAnterior	5	15		icop	0.154236	#DIV/0!	1	#DIV/0!
4	m	1	3	36	0.140145	0.140145	GE2	1	45	11	4/5	m4/5	MedAnterior	5	15		i4/5	0.402006	0.347177	5	0.155262
4	m	1	3	37	0.107312	0.107312	GE2	1	45	11	3	m3	MedAnterior	5	14		m2	0.106928	0.0562561	21	0.0122761
4	m	1	3	38	0.11839	0.11839	GE2	1	45	11	3	m3	MedAnterior	5	14		m3	0.185517	0.122137	20	0.0273106
4	m	1	3	39	0.127716	0.127716	GE2	1	45	11	3	m3	MedAnterior	5	14		m4/5	0.142453	0.0486234	20	0.0108725
4	m	1	3	40	0.112632	0.112632	GE2	1	45	11	3	m3	MedAnterior	5	14		m6	0.104306	0.0496462	17	0.012041
4	m	1	3	41	0.11962	0.11962	GE2	1	45	11	3	m3	MedAnterior	5	14		m7	0.0937092	0.0348601	9	0.01162
4	m	1	3	42	0.124354	0.124354	GE2	1	45	11	3	m3	MedAnterior	5	14		m8	0.118019	0.144779	14	0.0386938
4	m	1	3	43	0.209834	0.209834	GE2	1	45	11	2	m2	MedAnterior	5	13		m9	0.101526	0.0588011	15	0.0151824
4	m	1	3	44	0.110652	0.110652	GE2	1	45	11	2	m2	MedAnterior	5	13		m10	0.0753165	0.0424074	15	0.0109495
4	f	0	4	190604_1644	0.262141	0.262141	GE2	1	45	3	pfl	Lpfl	Vestibular	1	1
4	f	0	4	2	0.21596	0.21596	GE2	1	45	3	crus2	Lcrus2	Lateral	2	5
4	f	0	4	3	0.202296	0.202296	GE2	1	45	3	crus2	Lcrus2	Lateral	2	5
4	f	0	4	4	0.113446	0.113446	GE2	1	45	3	crus1	Lcrus1	Lateral	2	4
4	f	0	4	5	0.629799	0.629799	GE2	1	45	3	sim	Lsim	Lateral	2	3
4	f	0	4	6	0.0602905	0.0602905	GE2	1	45	7	cop	icop	IntPosterior	4	11
4	f	0	4	7	0.0729389	0.0729389	GE2	1	45	7	cop	icop	IntPosterior	4	11
4	f	0	4	8	0.104328	0.104328	GE2	1	45	7	cop	icop	IntPosterior	4	11
4	f	0	4	9	0.0690755	0.0690755	GE2	1	45	7	cop	icop	IntPosterior	4	11
4	f	0	4	10	0.0945291	0.0945291	GE2	1	45	7	cop	icop	IntPosterior	4	11
4	f	0	4	11	0.107041	0.107041	GE2	1	45	7	crus1	icrus1	IntPosterior	4	8
4	f	0	4	12	0.0927782	0.0927782	GE2	1	45	7	crus1	icrus1	IntPosterior	4	8
4	f	0	4	13	0.078847	0.078847	GE2	1	45	7	sim	isim	IntPosterior	4	7
4	f	0	4	14	0.209889	0.209889	GE2	1	45	7	4/5	i4/5	IntAnterior	3	12
4	f	0	4	15	0.110323	0.110323	GE2	1	45	7	4/5	i4/5	IntAnterior	3	12
4	f	0	4	16	0.0973078	0.0973078	GE2	1	45	10	10	m10	MedPosterior	6	20
4	f	0	4	17	0.0758152	0.0758152	GE2	1	45	10	10	m10	MedPosterior	6	20
4	f	0	4	18	0.098955	0.098955	GE2	1	45	10	9	m9	MedPosterior	6	19
4	f	0	4	19	0.0802178	0.0802178	GE2	1	45	10	9	m9	MedPosterior	6	19
4	f	0	4	20	0.0835961	0.0835961	GE2	1	45	10	9	m9	MedPosterior	6	19		GE1	400 days	N	7									m	N	3			f	N	4
4	f	0	4	21	0.130031	0.130031	GE2	1	45	10	8	m8	MedPosterior	6	18		By Position ID	average	stdev	n	sem		By major regions	average	stdev	n	sem		average	stdev	n	sem		average	stdev	n	sem
4	f	0	4	22	0.0945973	0.0945973	GE2	1	45	10	8	m8	MedPosterior	6	18		Lpfl	0.26048	0.17616	6	0.071917		Vestibular	0.235604	0.206544	10	0.0653148		0.0755869	0.0273527	4	0.0136763		0.342283	0.205423	6	0.0838637
4	f	0	4	23	0.0470941	0.0470941	GE2	1	45	10	7	m7	MedPosterior	6	17		Lfl	0.198291	0.270492	4	0.135246		Lateral	0.399429	0.389695	15	0.100619		0.295408	0.115693	7	0.043728		0.490447	0.521501	8	0.184378
4	f	0	4	24	0.0643877	0.0643877	GE2	1	45	10	6	m6	MedPosterior	6	16		Lsim	0.217691	0.0942137	3	0.0543943		IntAnterior	0.492489	0.545437	3	0.314908		0.177731	0.0237723	2	0.0168096		1.12201	#DIV/0!	1	#DIV/0!
4	f	0	4	25	0.0721367	0.0721367	GE2	1	45	10	6	m6	MedPosterior	6	16		Lcrus1	0.362486	0.227749	5	0.101852		IntPosterior	1.14921	3.65067	21	0.796642		1.78909	5.29281	10	1.67373		0.567505	0.812842	11	0.245081
4	f	0	4	26	0.114688	0.114688	GE2	1	45	10	4/5	m4/5	MedAnterior	5	15		Lcrus2	0.560039	0.563121	6	0.229893		MedAnterior	0.121181	0.0467594	51	0.00654762		0.110711	0.0431727	21	0.00942107		0.12851	0.0484699	30	0.00884935
4	f	0	4	27	0.0932555	0.0932555	GE2	1	45	10	4/5	m4/5	MedAnterior	5	15		Lpm	0.165695	#DIV/0!	1	#DIV/0!		MedPosterior	0.115311	0.115358	55	0.0155549		0.0943576	0.0442364	25	0.00884727		0.132772	0.149887	30	0.0273655
4	f	0	4	28	0.0772084	0.0772084	GE2	1	45	10	4/5	m4/5	MedAnterior	5	15		isim	0.143203	0.046103	4	0.0230515
4	f	0	4	29	0.104508	0.104508	GE2	1	45	10	4/5	m4/5	MedAnterior	5	15		icrus1	3.71076	7.35898	5	3.29104
4	f	0	4	30	0.613865	0.613865	GE2	1	45	10	4/5	m4/5	MedAnterior	5	15		icrus2	0.146066	0.0614305	5	0.0274726
4	f	0	4	31	0.111381	0.111381	GE2	1	45	10	3	m3	MedAnterior	5	14		ipm	0.634699	1.18437	5	0.529666
4	f	0	4	32	0.172421	0.172421	GE2	1	45	10	3	m3	MedAnterior	5	14		icop	0.551508	0.610022	2	0.43135
4	f	0	4	33	0.169576	0.169576	GE2	1	45	10	2	m2	MedAnterior	5	13		i4/5	0.492489	0.545437	3	0.314908
4	f	0	4	34	0.079839	0.079839	GE2	1	45	10	2	m2	MedAnterior	5	13		m2	0.112652	0.0400872	14	0.0107138
4	f	0	5	190611a_1726	#DIV/0!		GE2	1	45	3	pm	Lpm	Lateral	2	6		m3	0.110876	0.0415448	17	0.0100761
4	f	0	5	2	#DIV/0!		GE2	1	45	3	crus2	Lcrus2	Lateral	2	5		m4/5	0.135912	0.0531392	20	0.0118823
4	f	0	5	3	0.213887	0.213887	GE2	1	45	3	crus2	Lcrus2	Lateral	2	5		m6	0.132146	0.0786973	12	0.0227179
4	f	0	5	4	0.17992	0.17992	GE2	1	45	3	crus2	Lcrus2	Lateral	2	5		m7	0.342845	0.419416	3	0.24215
4	f	0	5	5	0.203353	0.203353	GE2	1	45	3	crus1	Lcrus1	Lateral	2	4		m8	0.105761	0.0233443	9	0.00778143
4	f	0	5	6	0.518541	0.518541	GE2	1	45	3	sim	Lsim		#N/A	3		m9	0.0823739	0.035798	18	0.00843767
4	f	0	5	7	0.207205	0.207205	GE2	1	45	6	4/5	i4/5	IntAnterior	3	12		m10	0.0994795	0.0866936	13	0.0240445
4	f	0	5	8	#DIV/0!		GE2	1	45	6	crus1	icrus1	IntPosterior	4	8
4	f	0	5	9	0.0926541	0.0926541	GE2	1	45	10	2	m2	MedAnterior	5	13
4	f	0	5	10	0.134558	0.134558	GE2	1	45	10	2	m2	MedAnterior	5	13
4	f	0	5	11	0.0694452	0.0694452	GE2	1	45	10	3	m3	MedAnterior	5	14
4	f	0	5	12	0.123081	0.123081	GE2	1	45	10	3	m3		#N/A	14
4	f	0	5	13	0.0694452	0.0694452	GE2	1	45	10	4/5	m4/5	MedAnterior	5	15
4	f	0	5	14	#DIV/0!		GE2	1	45	10	4/5	m4/5	MedAnterior	5	15
4	f	0	5	15	0.116153	0.116153	GE2	1	45	10	6	m6	MedPosterior	6	16
4	f	0	5	16	0.151466	0.151466	GE2	1	45	10	6	m6	MedPosterior	6	16
4	f	0	5	17	0.0980226	0.0980226	GE2	1	45	10	7	m7	MedPosterior	6	17
4	f	0	5	18	0.049445	0.049445	GE2	1	45	10	8	m8	MedPosterior	6	18
4	f	0	5	19	0.0910976	0.0910976	GE2	1	45	10	8	m8	MedPosterior	6	18
4	f	0	5	20	0.0571626	0.0571626	GE2	1	45	10	9	m9	MedPosterior	6	19
4	f	0	5	21	0.0721077	0.0721077	GE2	1	45	10	9	m9	MedPosterior	6	19
4	f	0	5	22	0.267165	0.267165	GE2	1	45	10	9	m9		#N/A	19
4	f	0	5	23	0.0379269	0.0379269	GE2	1	45	10	10	m10	MedPosterior	6	20
4	f	0	5	24	#DIV/0!		GE2	1	45	10	10	m10	MedPosterior	6	20
4	f	0	6	190612b_1760	0.0796718	0.0796718	GE2	1	45	3	pm	Lpm	Lateral	2	6
4	f	0	6	2	0.040908	0.040908	GE2	1	45	3	crus2	Lcrus2	Lateral	2	5
4	f	0	6	3	#DIV/0!		GE2	1	45	3	crus2	Lcrus2	Lateral	2	5
4	f	0	6	4	#DIV/0!		GE2	1	45	3	crus1	Lcrus1	Lateral	2	4
4	f	0	6	5	0.150504	0.150504	GE2	1	45	3	sim	Lsim	Lateral	2	3
4	f	0	6	6	0.355594	0.355594	GE2	1	45	7	crus2	icrus2	IntPosterior	4	9
4	f	0	6	7	0.235845	0.235845	GE2	1	45	7	crus2	icrus2	IntPosterior	4	9
4	f	0	6	8	0.191785	0.191785	GE2	1	45	7	crus1	icrus1	IntPosterior	4	8
4	f	0	6	9	0.614649	0.614649	GE2	1	45	7	crus1	icrus1	IntPosterior	4	8
4	f	0	6	10	0.236572	0.236572	GE2	1	45	7	4/5	i4/5	IntAnterior	3	12
4	f	0	6	11	0.334324	0.334324	GE2	1	45	7	4/5	i4/5	IntAnterior	3	12
4	f	0	6	12	0.102697	0.102697	GE2	1	45	13	10	m10	MedPosterior	6	20
4	f	0	6	13	0.0641292	0.0641292	GE2	1	45	13	10	m10	MedPosterior	6	20
4	f	0	6	14	0.080489	0.080489	GE2	1	45	13	9	m9	MedPosterior	6	19
4	f	0	6	15	0.15109	0.15109	GE2	1	45	13	9	m9	MedPosterior	6	19
4	f	0	6	16	0.355672	0.355672	GE2	1	45	13	9	m9	MedPosterior	6	19
4	f	0	6	17	0.40808	0.40808	GE2	1	45	13	8	m8	MedPosterior	6	18
4	f	0	6	18	0.15971	0.15971	GE2	1	45	13	8	m8	MedPosterior	6	18
4	f	0	6	19	0.118563	0.118563	GE2	1	45	13	7	m7	MedPosterior	6	17
4	f	0	6	20	0.0802167	0.0802167	GE2	1	45	13	6	m6	MedPosterior	6	16
4	f	0	6	21	0.0623638	0.0623638	GE2	1	45	13	6	m6	MedPosterior	6	16
4	f	0	6	22	0.156622	0.156622	GE2	1	45	13	4/5	m4/5	MedAnterior	5	15
4	f	0	6	23	0.120264	0.120264	GE2	1	45	13	4/5	m4/5	MedAnterior	5	15
4	f	0	6	24	0.140859	0.140859	GE2	1	45	13	4/5	m4/5	MedAnterior	5	15
4	f	0	6	25	0.0924837	0.0924837	GE2	1	45	13	4/5	m4/5	MedAnterior	5	15
4	f	0	6	26	0.0720672	0.0720672	GE2	1	45	13	4/5	m4/5	MedAnterior	5	15
4	f	0	6	27	0.200005	0.200005	GE2	1	45	13	3	m3		#N/A	14
4	f	0	6	28	0.156291	0.156291	GE2	1	45	13	2	m2	MedAnterior	5	13
4	m	1	7	190619a_1756	0.701635	0.701635	GE2	1	45	3	crus2	Lcrus2	Lateral	2	5
4	m	1	7	2	0.241307	0.241307	GE2	1	45	3	crus2	Lcrus2	Lateral	2	5
4	m	1	7	3	0.29416	0.29416	GE2	1	45	3	crus1	Lcrus1	Lateral	2	4
4	m	1	7	4	0.149537	0.149537	GE2	1	45	3	sim	Lsim	Lateral	2	3
4	m	1	7	5	0.16168	0.16168	GE2	1	45	7	sim	isim	IntPosterior	4	7
4	m	1	7	6	#DIV/0!		GE2	1	45	7	4/5	i4/5		#N/A	12
4	m	1	7	7	0.193299	0.193299	GE2	1	45	7	4/5	i4/5	IntAnterior	3	12
4	m	1	7	8	0.0882057	0.0882057	GE2	1	45	7	4/5	i4/5	IntAnterior	3	12
4	m	1	7	9	0.0614737	0.0614737	GE2	1	45	11	2	m2	MedAnterior	5	13
4	m	1	7	10	0.0772397	0.0772397	GE2	1	45	11	2	m2	MedAnterior	5	13
4	m	1	7	11	0.170564	0.170564	GE2	1	45	11	3	m3	MedAnterior	5	14
4	m	1	7	12	0.500036	0.500036	GE2	1	45	11	3	m3	MedAnterior	5	14
4	m	1	7	13	0.144217	0.144217	GE2	1	45	11	3	m3	MedAnterior	5	14
4	m	1	7	14	0.126782	0.126782	GE2	1	45	11	4/5	m4/5	MedAnterior	5	15
4	m	1	7	15	0.102899	0.102899	GE2	1	45	11	4/5	m4/5	MedAnterior	5	15
4	m	1	7	16	0.116479	0.116479	GE2	1	45	11	4/5	m4/5	MedAnterior	5	15
4	m	1	7	17	0.279197	0.279197	GE2	1	45	11	6	m6	MedPosterior	6	16
4	m	1	7	18	0.0948929	0.0948929	GE2	1	45	11	6	m6	MedPosterior	6	16
4	m	1	7	19	0.0597495	0.0597495	GE2	1	45	11	7	m7	MedPosterior	6	17
4	m	1	7	20	0.204766	0.204766	GE2	1	45	11	7	m7	MedPosterior	6	17
4	m	1	7	21	0.0589359	0.0589359	GE2	1	45	11	8	m8	MedPosterior	6	18
4	m	1	7	22	0.0892695	0.0892695	GE2	1	45	11	8	m8	MedPosterior	6	18
4	m	1	7	23	0.0792424	0.0792424	GE2	1	45	11	9	m9	MedPosterior	6	19
4	m	1	7	24	0.0308714	0.0308714	GE2	1	45	11	9	m9	MedPosterior	6	19
4	m	1	7	25	0.0737684	0.0737684	GE2	1	45	11	9	m9	MedPosterior	6	19
4	m	1	7	26	0.0510056	0.0510056	GE2	1	45	11	10	m10	MedPosterior	6	20
4	m	1	7	27	0.0525134	0.0525134	GE2	1	45	11	10	m10	MedPosterior	6	20
4	m	1	8	190620a_1757	#DIV/0!		GE2	1	45	3	sim	Lsim	Lateral	2	3
4	m	1	8	2	1.13724	1.13724	GE2	1	45	3	sim	Lsim		#N/A	3
4	m	1	8	3	0.266035	0.266035	GE2	1	45	3	crus1	Lcrus1	Lateral	2	4
4	m	1	8	4	0.112133	0.112133	GE2	1	45	3	crus1	Lcrus1	Lateral	2	4
4	m	1	8	5	0.77515	0.77515	GE2	1	45	3	crus2	Lcrus2	Lateral	2	5
4	m	1	8	6	0.0929491	0.0929491	GE2	1	45	3	crus2	Lcrus2	Lateral	2	5
4	m	1	8	7	0.292986	0.292986	GE2	1	45	6	cop	icop	IntPosterior	4	11
4	m	1	8	8	0.700224	0.700224	GE2	1	45	6	cop	icop	IntPosterior	4	11
4	m	1	8	9	0.0968556	0.0968556	GE2	1	45	6	pm	ipm	IntPosterior	4	10
4	m	1	8	10	0.655886	0.655886	GE2	1	45	6	pm	ipm	IntPosterior	4	10
4	m	1	8	11	0.136749	0.136749	GE2	1	45	6	crus2	icrus2	IntPosterior	4	9
4	m	1	8	12	0.226674	0.226674	GE2	1	45	6	crus2	icrus2	IntPosterior	4	9
4	m	1	8	13	0.228041	0.228041	GE2	1	45	6	crus1	icrus1	IntPosterior	4	8
4	m	1	8	14	0.304646	0.304646	GE2	1	45	6	crus1	icrus1	IntPosterior	4	8
4	m	1	8	15	0.158813	0.158813	GE2	1	45	6	sim	isim	IntPosterior	4	7
4	m	1	8	16	0.0976722	0.0976722	GE2	1	45	6	sim	isim	IntPosterior	4	7
4	m	1	8	17	0.0947063	0.0947063	GE2	1	45	6	4/5	i4/5	IntAnterior	3	12
4	m	1	8	18	0.0558015	0.0558015	GE2	1	45	11	10	m10	MedPosterior	6	20
4	m	1	8	19	0.0777855	0.0777855	GE2	1	45	11	10	m10	MedPosterior	6	20
4	m	1	8	20	0.0927737	0.0927737	GE2	1	45	11	9	m9	MedPosterior	6	19
4	m	1	8	21	0.333304	0.333304	GE2	1	45	11	9	m9	MedPosterior	6	19
4	m	1	8	22	0.14343	0.14343	GE2	1	45	11	9	m9	MedPosterior	6	19
4	m	1	8	23	0.214608	0.214608	GE2	1	45	11	8	m8	MedPosterior	6	18
4	m	1	8	24	0.162967	0.162967	GE2	1	45	11	8	m8	MedPosterior	6	18
4	m	1	8	25	0.161166	0.161166	GE2	1	45	11	7	m7	MedPosterior	6	17
4	m	1	8	26	0.145942	0.145942	GE2	1	45	11	6	m6	MedPosterior	6	16
4	m	1	8	27	0.141462	0.141462	GE2	1	45	11	6	m6	MedPosterior	6	16
4	m	1	8	28	0.358137	0.358137	GE2	1	45	11	4/5	m4/5	MedAnterior	5	15
4	m	1	8	29	1.00859	1.00859	GE2	1	45	11	4/5	m4/5	MedAnterior	5	15
4	m	1	8	30	0.265698	0.265698	GE2	1	45	11	4/5	m4/5	MedAnterior	5	15
4	m	1	8	31	0.296492	0.296492	GE2	1	45	11	4/5	m4/5	MedAnterior	5	15
4	m	1	8	32	0.288195	0.288195	GE2	1	45	11	3	m3	MedAnterior	5	14
4	m	1	8	33	0.0865638	0.0865638	GE2	1	45	11	3	m3	MedAnterior	5	14
4	m	1	8	34	#DIV/0!		GE2	1	45	11	2	m2	MedAnterior	5	13
4	f	0	9	190725a_1569	0.0867385	0.0867385	GE3	2	120	3	pm	Lpm	Lateral	2	6
4	f	0	9	2	0.40349	0.40349	GE3	2	120	5	cop	icop	IntPosterior	4	11
4	f	0	9	3	0.117972	0.117972	GE3	2	120	5	pm	ipm	IntPosterior	4	10
4	f	0	9	4	0.182132	0.182132	GE3	2	120	5	crus1	icrus1	IntPosterior	4	8
4	f	0	9	5	0.0723608	0.0723608	GE3	2	120	10	2	m2	MedAnterior	5	13
4	f	0	9	6	0.230042	0.230042	GE3	2	120	10	2	m2	MedAnterior	5	13
4	f	0	9	7	0.100383	0.100383	GE3	2	120	10	3	m3	MedAnterior	5	14
4	f	0	9	8	0.125383	0.125383	GE3	2	120	10	4/5	m4/5	MedAnterior	5	15
4	f	0	9	9	0.206327	0.206327	GE3	2	120	10	4/5	m4/5	MedAnterior	5	15
4	f	0	9	10	0.187893	0.187893	GE3	2	120	10	4/5	m4/5	MedAnterior	5	15
4	f	0	9	11	0.146861	0.146861	GE3	2	120	10	6	m6	MedPosterior	6	16
4	f	0	9	12	0.19839	0.19839	GE3	2	120	10	7	m7	MedPosterior	6	17
4	f	0	9	13	0.377581	0.377581	GE3	2	120	10	7	m7	MedPosterior	6	17
4	f	0	9	14	0.0793084	0.0793084	GE3	2	120	10	8	m8	MedPosterior	6	18
4	f	0	9	15	0.282966	0.282966	GE3	2	120	10	8	m8	MedPosterior	6	18
4	f	0	9	16	0.069039	0.069039	GE3	2	120	10	9	m9	MedPosterior	6	19
4	f	0	9	17	0.0627631	0.0627631	GE3	2	120	10	10	m10	MedPosterior	6	20
4	f	0	9	18	0.0644711	0.0644711	GE3	2	120	10	10	m10	MedPosterior	6	20
4	f	0	10	190726a_1567	0.356997	0.356997	GE3	2	120	3	sim	Lsim	Lateral	2	3
4	f	0	10	2	#DIV/0!		GE3	2	120	3	sim	Lsim		#N/A	3
4	f	0	10	3	0.346248	0.346248	GE3	2	120	3	crus1	Lcrus1	Lateral	2	4
4	f	0	10	4	0.139917	0.139917	GE3	2	120	3	crus1	Lcrus1	Lateral	2	4
4	f	0	10	5	#DIV/0!		GE3	2	120	3	crus2	Lcrus2		#N/A	5
4	f	0	10	6	0.323947	0.323947	GE3	2	120	3	crus2	Lcrus2	Lateral	2	5
4	f	0	10	7	0.202305	0.202305	GE3	2	120	6	cop	icop	IntPosterior	4	11
4	f	0	10	8	0.147276	0.147276	GE3	2	120	6	pm	ipm	IntPosterior	4	10
4	f	0	10	9	0.190403	0.190403	GE3	2	120	6	crus2	icrus2	IntPosterior	4	9
4	f	0	10	10	0.151892	0.151892	GE3	2	120	6	crus1	icrus1	IntPosterior	4	8
4	f	0	10	11	0.193557	0.193557	GE3	2	120	6	sim	isim	IntPosterior	4	7
4	f	0	10	12	0.575708	0.575708	GE3	2	120	6	4/5	i4/5	IntAnterior	3	12
4	f	0	10	13	0.36207	0.36207	GE3	2	120	10	2	m2	MedAnterior	5	13
4	f	0	10	14	0.124576	0.124576	GE3	2	120	10	2	m2	MedAnterior	5	13
4	f	0	10	15	0.142057	0.142057	GE3	2	120	10	3	m3	MedAnterior	5	14
4	f	0	10	16	0.187682	0.187682	GE3	2	120	10	3	m3	MedAnterior	5	14
4	f	0	10	17	0.192545	0.192545	GE3	2	120	10	3	m3	MedAnterior	5	14
4	f	0	10	18	0.200577	0.200577	GE3	2	120	10	4/5	m4/5	MedAnterior	5	15
4	f	0	10	19	0.199307	0.199307	GE3	2	120	10	4/5	m4/5	MedAnterior	5	15
4	f	0	10	20	0.109447	0.109447	GE3	2	120	10	4/5	m4/5	MedAnterior	5	15
4	f	0	10	21	0.16661	0.16661	GE3	2	120	10	6	m6	MedPosterior	6	16
4	f	0	10	22	0.132416	0.132416	GE3	2	120	10	6	m6	MedPosterior	6	16
4	f	0	10	23	0.0892626	0.0892626	GE3	2	120	10	6	m6	MedPosterior	6	16
4	f	0	10	24	0.089777	0.089777	GE3	2	120	10	8	m8	MedPosterior	6	18
4	f	0	10	25	0.188138	0.188138	GE3	2	120	10	9	m9	MedPosterior	6	19
4	f	0	10	26	0.0588531	0.0588531	GE3	2	120	10	10	m10	MedPosterior	6	20
4	m	1	11	190807a_1622	0.801887	0.801887	GE3	2	120	2	sim	Lsim	Lateral	2	3
4	m	1	11	2	#DIV/0!		GE3	2	120	2	crus1	Lcrus1		#N/A	4
4	m	1	11	3	0.288095	0.288095	GE3	2	120	2	crus1	Lcrus1	Lateral	2	4
4	m	1	11	4	0.214333	0.214333	GE3	2	120	2	crus2	Lcrus2	Lateral	2	5
4	m	1	11	5	#DIV/0!		GE3	2	120	2	crus2	Lcrus2		#N/A	5
4	m	1	11	6	0.204257	0.204257	GE3	2	120	2	crus2	Lcrus2	Lateral	2	5
4	m	1	11	7	0.100783	0.100783	GE3	2	120	2	pfl	Lpfl	Vestibular	1	1
4	m	1	11	8	0.147548	0.147548	GE3	2	120	6	pm	ipm	IntPosterior	4	10
4	m	1	11	9	0.132293	0.132293	GE3	2	120	6	pm	ipm	IntPosterior	4	10
4	m	1	11	10	0.115079	0.115079	GE3	2	120	6	crus2	icrus2	IntPosterior	4	9
4	m	1	11	11	0.132426	0.132426	GE3	2	120	6	crus2	icrus2	IntPosterior	4	9
4	m	1	11	12	0.211164	0.211164	GE3	2	120	6	crus1	icrus1	IntPosterior	4	8
4	m	1	11	13	0.136788	0.136788	GE3	2	120	12	10	m10	MedPosterior	6	20
4	m	1	11	14	0.0835973	0.0835973	GE3	2	120	12	10	m10	MedPosterior	6	20
4	m	1	11	15	0.0979704	0.0979704	GE3	2	120	12	9	m9	MedPosterior	6	19
4	m	1	11	16	0.0806071	0.0806071	GE3	2	120	12	9	m9	MedPosterior	6	19
4	m	1	11	17	0.0433572	0.0433572	GE3	2	120	12	9	m9	MedPosterior	6	19
4	m	1	11	18	0.0754219	0.0754219	GE3	2	120	12	9	m9	MedPosterior	6	19
4	m	1	11	19	0.0582343	0.0582343	GE3	2	120	12	8	m8	MedPosterior	6	18
4	m	1	11	20	0.103414	0.103414	GE3	2	120	12	7	m7	MedPosterior	6	17
4	m	1	11	21	0.182379	0.182379	GE3	2	120	12	6	m6	MedPosterior	6	16
4	m	1	11	22	0.090316	0.090316	GE3	2	120	12	4/5	m4/5	MedAnterior	5	15
4	m	1	11	23	0.447275	0.447275	GE3	2	120	12	4/5	m4/5	MedAnterior	5	15
4	m	1	11	24	0.0687434	0.0687434	GE3	2	120	12	4/5	m4/5	MedAnterior	5	15
4	m	1	11	25	0.139819	0.139819	GE3	2	120	12	3	m3	MedAnterior	5	14
4	m	1	11	26	0.127806	0.127806	GE3	2	120	12	3	m3	MedAnterior	5	14
4	m	1	11	27	0.0492726	0.0492726	GE3	2	120	12	2	m2	MedAnterior	5	13
4	m	1	11	28	#DIV/0!		GE3	2	120	12	2	m2	MedAnterior	5	13
4	m	1	12	190809a_1638	0.135222	0.135222	GE3	2	120	2	crus1	Lcrus1	Lateral	2	4
4	m	1	12	2	0.664026	0.664026	GE3	2	120	2	crus1	Lcrus1	Lateral	2	4
4	m	1	12	3	0.121448	0.121448	GE3	2	120	2	crus2	Lcrus2	Lateral	2	5
4	m	1	12	4	0.309039	0.309039	GE3	2	120	5	pm	ipm	IntPosterior	4	10
4	m	1	12	5	0.173794	0.173794	GE3	2	120	5	crus2	icrus2	IntPosterior	4	9
4	m	1	12	6	0.179287	0.179287	GE3	2	120	5	crus2	icrus2	IntPosterior	4	9
4	m	1	12	7	0.178654	0.178654	GE3	2	120	5	crus1	icrus1	IntPosterior	4	8
4	m	1	12	8	0.134806	0.134806	GE3	2	120	5	cop	icop	IntPosterior	4	11
4	m	1	12	9	0.976445	0.976445	GE3	2	120	11	10	m10	MedPosterior	6	20
4	m	1	12	10	0.0672232	0.0672232	GE3	2	120	11	10	m10	MedPosterior	6	20
4	m	1	12	11	0.0480463	0.0480463	GE3	2	120	11	9	m9	MedPosterior	6	19
4	m	1	12	12	0.10416	0.10416	GE3	2	120	11	9	m9	MedPosterior	6	19
4	m	1	12	13	0.0718802	0.0718802	GE3	2	120	11	9	m9	MedPosterior	6	19
4	m	1	12	14	0.0909348	0.0909348	GE3	2	120	11	8	m8	MedPosterior	6	18
4	m	1	12	15	0.11799	0.11799	GE3	2	120	11	8	m8	MedPosterior	6	18
4	m	1	12	16	0.10332	0.10332	GE3	2	120	11	7	m7	MedPosterior	6	17
4	m	1	12	17	0.0898503	0.0898503	GE3	2	120	11	6	m6	MedPosterior	6	16
4	m	1	12	18	0.0742974	0.0742974	GE3	2	120	11	6	m6	MedPosterior	6	16
4	m	1	12	19	0.0592443	0.0592443	GE3	2	120	11	6	m6	MedPosterior	6	16
4	m	1	12	20	0.0816436	0.0816436	GE3	2	120	11	4/5	m4/5	MedAnterior	5	15
4	m	1	12	21	0.0908333	0.0908333	GE3	2	120	11	4/5	m4/5	MedAnterior	5	15
4	m	1	12	22	0.141581	0.141581	GE3	2	120	11	4/5	m4/5	MedAnterior	5	15
4	m	1	12	23	0.109456	0.109456	GE3	2	120	11	4/5	m4/5	MedAnterior	5	15
4	m	1	12	24	0.0520458	0.0520458	GE3	2	120	11	4/5	m4/5	MedAnterior	5	15
4	m	1	12	25	0.167304	0.167304	GE3	2	120	11	3	m3	MedAnterior	5	14
4	m	1	12	26	0.160146	0.160146	GE3	2	120	11	3	m3	MedAnterior	5	14
4	m	1	12	27	0.0736388	0.0736388	GE3	2	120	11	3	m3	MedAnterior	5	14
4	m	1	12	28	0.0918127	0.0918127	GE3	2	120	11	3	m3	MedAnterior	5	14
4	m	1	12	29	0.0889694	0.0889694	GE3	2	120	11	2	m2	MedAnterior	5	13
4	m	1	12	30	0.0681445	0.0681445	GE3	2	120	11	2	m2	MedAnterior	5	13
4	m	1	12	31	0.0742974	0.0742974	GE3	2	120	11	2	m2	MedAnterior	5	13
4	m	1	13	190819a_1706	0.140844	0.140844	GE3	2	120	3	pm	Lpm	Lateral	2	6
4	m	1	13	2	0.149016	0.149016	GE3	2	120	3	pm	Lpm	Lateral	2	6
4	m	1	13	3	0.146808	0.146808	GE3	2	120	3	crus2	Lcrus2	Lateral	2	5
4	m	1	13	4	0.245014	0.245014	GE3	2	120	3	crus2	Lcrus2	Lateral	2	5
4	m	1	13	5	#DIV/0!		GE3	2	120	3	crus1	Lcrus1		#N/A	4
4	m	1	13	6	#DIV/0!		GE3	2	120	3	crus1	Lcrus1		#N/A	4
4	m	1	13	7	#DIV/0!		GE3	2	120	6	cop	icop		#N/A	11
4	m	1	13	8	2.34981	2.34981	GE3	2	120	6	pm	ipm	IntPosterior	4	10
4	m	1	13	9	0.200602	0.200602	GE3	2	120	6	crus1	icrus1	IntPosterior	4	8
4	m	1	13	10	0.207378	0.207378	GE3	2	120	6	crus1	icrus1	IntPosterior	4	8
4	m	1	13	11	#DIV/0!		GE3	2	120	6	4/5	i4/5		#N/A	12
4	m	1	13	12	0.304606	0.304606	GE3	2	120	12	10	m10	MedPosterior	6	20
4	m	1	13	13	0.0726467	0.0726467	GE3	2	120	12	10	m10	MedPosterior	6	20
4	m	1	13	14	0.107998	0.107998	GE3	2	120	12	9	m9	MedPosterior	6	19
4	m	1	13	15	0.147935	0.147935	GE3	2	120	12	9	m9	MedPosterior	6	19
4	m	1	13	16	0.152284	0.152284	GE3	2	120	12	9	m9	MedPosterior	6	19
4	m	1	13	17	0.0856305	0.0856305	GE3	2	120	12	8	m8	MedPosterior	6	18
4	m	1	13	18	0.106608	0.106608	GE3	2	120	12	7	m7	MedPosterior	6	17
4	m	1	13	19	0.0555703	0.0555703	GE3	2	120	12	6	m6	MedPosterior	6	16
4	m	1	13	20	0.062203	0.062203	GE3	2	120	12	6	m6	MedPosterior	6	16
4	m	1	13	21	0.118056	0.118056	GE3	2	120	12	4/5	m4/5	MedAnterior	5	15
4	m	1	13	22	0.148184	0.148184	GE3	2	120	12	4/5	m4/5	MedAnterior	5	15
4	m	1	13	23	0.225338	0.225338	GE3	2	120	12	4/5	m4/5	MedAnterior	5	15
4	m	1	13	24	0.260147	0.260147	GE3	2	120	12	3	m3	MedAnterior	5	14
4	m	1	13	25	0.215472	0.215472	GE3	2	120	12	3	m3	MedAnterior	5	14
4	m	1	13	26	0.33534	0.33534	GE3	2	120	12	2	m2	MedAnterior	5	13
4	m	1	13	27	0.0815647	0.0815647	GE3	2	120	12	2	m2	MedAnterior	5	13
4	f	0	14	190822_1724	#VALUE!		GE3	2	120	3	sim	Lsim	Lateral	2	3
4	f	0	14	1	0.239426	0.239426	GE3	2	120	3	sim	Lsim	Lateral	2	3
4	f	0	14	2	0.806854	0.806854	GE3	2	120	3	crus1	Lcrus1	Lateral	2	4
4	f	0	14	3	0.476475	0.476475	GE3	2	120	3	crus2	Lcrus2	Lateral	2	5
4	f	0	14	4	0.121021	0.121021	GE3	2	120	3	crus2	Lcrus2	Lateral	2	5
4	f	0	14	5	0.167248	0.167248	GE3	2	120	3	crus2	Lcrus2	Lateral	2	5
4	f	0	14	6	0.14133	0.14133	GE3	2	120	3	pm	Lpm	Lateral	2	6
4	f	0	14	7	0.128096	0.128096	GE3	2	120	6	4/5	i4/5	IntAnterior	3	12
4	f	0	14	8	0.525774	0.525774	GE3	2	120	6	sim	isim	IntPosterior	4	7
4	f	0	14	9	0.125315	0.125315	GE3	2	120	6	crus1	icrus1	IntPosterior	4	8
4	f	0	14	10	0.371971	0.371971	GE3	2	120	6	crus2	icrus2	IntPosterior	4	9
4	f	0	14	11	0.256531	0.256531	GE3	2	120	6	crus2	icrus2	IntPosterior	4	9
4	f	0	14	12	0.125628	0.125628	GE3	2	120	6	pm	ipm	IntPosterior	4	10
4	f	0	14	13	0.08081	0.08081	GE3	2	120	12	2	m2	MedAnterior	5	13
4	f	0	14	14	0.0674077	0.0674077	GE3	2	120	12	2	m2	MedAnterior	5	13
4	f	0	14	15	0.0913876	0.0913876	GE3	2	120	12	3	m3	MedAnterior	5	14
4	f	0	14	16	0.412465	0.412465	GE3	2	120	12	3	m3	MedAnterior	5	14
4	f	0	14	17	0.0977865	0.0977865	GE3	2	120	12	3	m3	MedAnterior	5	14
4	f	0	14	18	0.133817	0.133817	GE3	2	120	12	4/5	m4/5	MedAnterior	5	15
4	f	0	14	19	0.14092	0.14092	GE3	2	120	12	4/5	m4/5	MedAnterior	5	15
4	f	0	14	20	0.104112	0.104112	GE3	2	120	12	6	m6	MedPosterior	6	16
4	f	0	14	21	0.135682	0.135682	GE3	2	120	12	6	m6	MedPosterior	6	16
4	f	0	14	22	0.130396	0.130396	GE3	2	120	12	7	m7	MedPosterior	6	17
4	f	0	14	23	0.0757585	0.0757585	GE3	2	120	12	7	m7	MedPosterior	6	17
4	f	0	14	24	0.0847161	0.0847161	GE3	2	120	12	8	m8	MedPosterior	6	18
4	f	0	14	25	0.114699	0.114699	GE3	2	120	12	8	m8	MedPosterior	6	18
4	f	0	14	26	0.145313	0.145313	GE3	2	120	12	9	m9	MedPosterior	6	19
4	f	0	14	27	0.0731395	0.0731395	GE3	2	120	12	9	m9	MedPosterior	6	19
4	f	0	14	28	0.857275	0.857275	GE3	2	120	12	9	m9	MedPosterior	6	19
4	f	0	14	29	0.057546	0.057546	GE3	2	120	12	10	m10	MedPosterior	6	20
4	f	0	14	30	0.110164	0.110164	GE3	2	120	12	10	m10	MedPosterior	6	20
4	f	0	15	190822a_1725	0.16968	0.16968	GE3	2	120	3	crus1	Lcrus1	Lateral	2	4
4	f	0	15	2	0.985502	0.985502	GE3	2	120	7	crus1	icrus1	IntPosterior	4	8
4	f	0	15	3	0.125438	0.125438	GE3	2	120	7					#N/A
4	f	0	15	4	0.191289	0.191289	GE3	2	120	7	crus1	crus1			#N/A
4	f	0	15	5	0.169626	0.169626	GE3	2	120	7	crus2	icrus2	IntPosterior	4	9
4	f	0	15	6	0.0456892	0.0456892	GE3	2	120	12	10	m10	MedPosterior	6	20
4	f	0	15	7	0.0381774	0.0381774	GE3	2	120	12	10	m10	MedPosterior	6	20
4	f	0	15	8	0.0631779	0.0631779	GE3	2	120	12	9	m9	MedPosterior	6	19
4	f	0	15	9	0.0744842	0.0744842	GE3	2	120	12	9	m9	MedPosterior	6	19
4	f	0	15	10	0.0606099	0.0606099	GE3	2	120	12	9	m9	MedPosterior	6	19
4	f	0	15	11	0.364895	0.364895	GE3	2	120	12	7	m7	MedPosterior	6	17
4	f	0	15	12	0.194566	0.194566	GE3	2	120	12	7	m7	MedPosterior	6	17
4	f	0	15	13	0.173272	0.173272	GE3	2	120	12	6	m6	MedPosterior	6	16
4	f	0	15	14	0.121762	0.121762	GE3	2	120	12	6	m6	MedPosterior	6	16
4	f	0	15	15	0.0757882	0.0757882	GE3	2	120	12	4/5	m4/5	MedAnterior	5	15
4	f	0	15	16	0.101646	0.101646	GE3	2	120	12	4/5	m4/5	MedAnterior	5	15
4	f	0	15	17	0.175419	0.175419	GE3	2	120	12	4/5	m4/5	MedAnterior	5	15
4	f	0	15	18	0.124281	0.124281	GE3	2	120	12	3	m3	MedAnterior	5	14
4	f	0	15	19	0.361992	0.361992	GE3	2	120	12	3	m3	MedAnterior	5	14
4	f	0	15	20	#DIV/0!		GE3	2	120	12				#N/A	#N/A
4	f	0	15	21	0.0629991	0.0629991	GE3	2	120	12	2	m2	MedAnterior	5	13
4	f	0	15	22	0.106015	0.106015	GE3	2	120	12	2	m2	MedAnterior	5	13
4	m	1	16	190903_1735	0.170359	0.170359	GE3	2	120	3	pm	Lpm	Lateral	2	6
4	m	1	16	2	#DIV/0!		GE3	2	120	3	pm	Lpm		#N/A	6
4	m	1	16	3	0.107403	0.107403	GE3	2	120	3	crus2	Lcrus2	Lateral	2	5
4	m	1	16	4	#DIV/0!		GE3	2	120	3	crus2	Lcrus2		#N/A	5
4	m	1	16	5	#DIV/0!		GE3	2	120	3	crus1	Lcrus1		#N/A	4
4	m	1	16	6	0.189523	0.189523	GE3	2	120	3	crus1	Lcrus1	Lateral	2	4
4	m	1	16	7	#DIV/0!		GE3	2	120	3	sim	Lsim		#N/A	3
4	m	1	16	8	#DIV/0!		GE3	2	120	3	sim	Lsim	Lateral	2	3
4	m	1	16	9	0.321499	0.321499	GE3	2	120	6	cop	icop	IntPosterior	4	11
4	m	1	16	10	#DIV/0!		GE3	2	120	6	pm	ipm		#N/A	10
4	m	1	16	11	0.0682559	0.0682559	GE3	2	120	6	crus2	icrus2	IntPosterior	4	9
4	m	1	16	12	0.0865225	0.0865225	GE3	2	120	6	crus1	icrus1	IntPosterior	4	8
4	m	1	16	13	0.120027	0.120027	GE3	2	120	6	4/5	i4/5	IntAnterior	3	12
4	m	1	16	14	0.069872	0.069872	GE3	2	120	11	2	m2	MedAnterior	5	13
4	m	1	16	15	0.0869347	0.0869347	GE3	2	120	11	2	m2	MedAnterior	5	13
4	m	1	16	16	0.180477	0.180477	GE3	2	120	11	3	m3	MedAnterior	5	14
4	m	1	16	17	0.0992588	0.0992588	GE3	2	120	11	3	m3	MedAnterior	5	14
4	m	1	16	18	0.225345	0.225345	GE3	2	120	11	3	m3	MedAnterior	5	14
4	m	1	16	19	0.23138	0.23138	GE3	2	120	11	4/5	m4/5	MedAnterior	5	15
4	m	1	16	20	0.08592	0.08592	GE3	2	120	11	4/5	m4/5	MedAnterior	5	15
4	m	1	16	21	0.0524477	0.0524477	GE3	2	120	11	4/5	m4/5	MedAnterior	5	15
4	m	1	16	22	0.159013	0.159013	GE3	2	120	11	4/5	m4/5	MedAnterior	5	15
4	m	1	16	23	0.136022	0.136022	GE3	2	120	11	4/5	m4/5	MedAnterior	5	15
4	m	1	16	24	0.118358	0.118358	GE3	2	120	11	6	m6	MedPosterior	6	16
4	m	1	16	25	0.0777996	0.0777996	GE3	2	120	11	6	m6	MedPosterior	6	16
4	m	1	16	26	0.096345	0.096345	GE3	2	120	11	7	m7	MedPosterior	6	17
4	m	1	16	27	0.0725087	0.0725087	GE3	2	120	11	8	m8	MedPosterior	6	18
4	m	1	16	28	0.0601013	0.0601013	GE3	2	120	11	8	m8	MedPosterior	6	18
4	m	1	16	29	0.0541972	0.0541972	GE3	2	120	11	9	m9	MedPosterior	6	19
4	m	1	16	30	0.0562599	0.0562599	GE3	2	120	11	9	m9	MedPosterior	6	19
4	m	1	16	31	0.0846855	0.0846855	GE3	2	120	11	9	m9	MedPosterior	6	19
4	m	1	16	32	#DIV/0!		GE3	2	120	11	10	m10		#N/A	20
4	m	1	16	33	0.512768	0.512768	GE3	2	120	11	10	m10	MedPosterior	6	20
4	m	1	16	34	0.0514814	0.0514814	GE3	2	120	11	10	m10	MedPosterior	6	20
4	m	1	17	191004a_1449	0.705598	0.705598	GE4	3	210	3	sim	Lsim	Lateral	2	3
4	m	1	17	2	0.347695	0.347695	GE4	3	210	3	sim	Lsim	Lateral	2	3
4	m	1	17	3	0.193133	0.193133	GE4	3	210	3	sim	Lsim	Lateral	2	3
4	m	1	17	4	0.124103	0.124103	GE4	3	210	3	crus1	Lcrus1	Lateral	2	4
4	m	1	17	5	0.0982454	0.0982454	GE4	3	210	3	crus1	Lcrus1	Lateral	2	4
4	m	1	17	6	0.308176	0.308176	GE4	3	210	3	crus2	Lcrus2	Lateral	2	5
4	m	1	17	7	0.383947	0.383947	GE4	3	210	3	pm	Lpm	Lateral	2	6
4	m	1	17	8	0.06604	0.06604	GE4	3	210	6	crus2	icrus2	IntPosterior	4	9
4	m	1	17	9	0.0826154	0.0826154	GE4	3	210	6	sim	isim	IntPosterior	4	7
4	m	1	17	10	0.193154	0.193154	GE4	3	210	6	4/5	i4/5	IntAnterior	3	12
4	m	1	17	11	0.064591	0.064591	GE4	3	210	11	2	m2	MedAnterior	5	13
4	m	1	17	12	0.0731367	0.0731367	GE4	3	210	11	2	m2	MedAnterior	5	13
4	m	1	17	13	0.0743049	0.0743049	GE4	3	210	11	3	m3	MedAnterior	5	14
4	m	1	17	14	0.216055	0.216055	GE4	3	210	11	3	m3	MedAnterior	5	14
4	m	1	17	15	0.223187	0.223187	GE4	3	210	11	4/5	m4/5	MedAnterior	5	15
4	m	1	17	16	0.157969	0.157969	GE4	3	210	11	4/5	m4/5	MedAnterior	5	15
4	m	1	17	17	0.114183	0.114183	GE4	3	210	11	4/5	m4/5	MedAnterior	5	15
4	m	1	17	18	0.169738	0.169738	GE4	3	210	11	4/5	m4/5	MedAnterior	5	15
4	m	1	17	19	0.104382	0.104382	GE4	3	210	11	6	m6	MedPosterior	6	16
4	m	1	17	20	0.191283	0.191283	GE4	3	210	11	6	m6	MedPosterior	6	16
4	m	1	17	21	0.14156	0.14156	GE4	3	210	11	7	m7	MedPosterior	6	17
4	m	1	17	22	0.0460604	0.0460604	GE4	3	210	11	7	m7	MedPosterior	6	17
4	m	1	17	23	0.0372361	0.0372361	GE4	3	210	11	8	m8	MedPosterior	6	18
4	m	1	17	24	0.176203	0.176203	GE4	3	210	11	9	m9	MedPosterior	6	19
4	m	1	17	25	0.0349527	0.0349527	GE4	3	210	11	10	m10	MedPosterior	6	20
4	m	1	17	26	0.201288	0.201288	GE4	3	210	11	10	m10	MedPosterior	6	20				#NAME?
4	m	1	18	191004b_1447	1.1322	1.1322	GE4	3	210	3	crus2	Lcrus2	Lateral	2	5
4	m	1	18	2	1.01514	1.01514	GE4	3	210	3	crus2	Lcrus2	Lateral	2	5
4	m	1	18	3	0.448951	0.448951	GE4	3	210	3	crus2	Lcrus2	Lateral	2	5
4	m	1	18	4	0.214663	0.214663	GE4	3	210	3	crus2	Lcrus2	Lateral	2	5
4	m	1	18	5	0.1016	0.1016	GE4	3	210	6	4/5	i4/5	IntAnterior	3	12
4	m	1	18	6	0.0951916	0.0951916	GE4	3	210	6	sim	isim	IntPosterior	4	7
4	m	1	18	7	0.210949	0.210949	GE4	3	210	6	crus2	icrus2	IntPosterior	4	9
4	m	1	18	8	0.174833	0.174833	GE4	3	210	6	pm	ipm	IntPosterior	4	10
4	m	1	18	9	0.119366	0.119366	GE4	3	210	12	2	m2	MedAnterior	5	13
4	m	1	18	10	0.0605962	0.0605962	GE4	3	210	12	2	m2	MedAnterior	5	13
4	m	1	18	11	0.166463	0.166463	GE4	3	210	12	2	m2	MedAnterior	5	13
4	m	1	18	12	0.103356	0.103356	GE4	3	210	12	3	m3	MedAnterior	5	14
4	m	1	18	13	0.288701	0.288701	GE4	3	210	12	3	m3	MedAnterior	5	14
4	m	1	18	14	0.612127	0.612127	GE4	3	210	12	3	m3	MedAnterior	5	14
4	m	1	18	15	0.166993	0.166993	GE4	3	210	12	4/5	m4/5	MedAnterior	5	15
4	m	1	18	16	0.129856	0.129856	GE4	3	210	12	4/5	m4/5	MedAnterior	5	15
4	m	1	18	17	0.114262	0.114262	GE4	3	210	12	4/5	m4/5	MedAnterior	5	15
4	m	1	18	18	0.136414	0.136414	GE4	3	210	12	4/5	m4/5	MedAnterior	5	15
4	m	1	18	19	0.228701	0.228701	GE4	3	210	12	6	m6	MedPosterior	6	16
4	m	1	18	20	0.0791682	0.0791682	GE4	3	210	12	6	m6	MedPosterior	6	16
4	m	1	18	21	0.0472683	0.0472683	GE4	3	210	12	6	m6	MedPosterior	6	16
4	m	1	18	22	0.0925106	0.0925106	GE4	3	210	12	7	m7	MedPosterior	6	17
4	m	1	18	23	0.142996	0.142996	GE4	3	210	12	7	m7	MedPosterior	6	17
4	m	1	18	24	0.0991351	0.0991351	GE4	3	210	12	7	m7	MedPosterior	6	17
4	m	1	18	25	0.613865	0.613865	GE4	3	210	12	8	m8	MedPosterior	6	18
4	m	1	18	26	0.114536	0.114536	GE4	3	210	12	8	m8	MedPosterior	6	18
4	m	1	18	27	0.0517226	0.0517226	GE4	3	210	12	9	m9	MedPosterior	6	19
4	m	1	18	28	0.198853	0.198853	GE4	3	210	12	9	m9	MedPosterior	6	19
4	m	1	18	29	0.0504512	0.0504512	GE4	3	210	12	10	m10	MedPosterior	6	20
4	m	1	18	30	0.0465554	0.0465554	GE4	3	210	12	10	m10	MedPosterior	6	20
4	f	0	19	191030_1576	2.36528	2.36528	GE4	3	210	3	sim	Lsim	Lateral	2	3
4	f	0	19		0.129124	0.129124	GE4	3	210	3	sim	Lsim	Lateral	2	3
4	f	0	19		0.755798	0.755798	GE4	3	210	6	4/5	i4/5	IntAnterior	3	12
4	f	0	19		0.153166	0.153166	GE4	3	210	6	sim	isim	IntPosterior	4	7
4	f	0	19		0.100039	0.100039	GE4	3	210	11	10	m10	MedPosterior	6	20
4	f	0	19		0.0551286	0.0551286	GE4	3	210	11	10	m10	MedPosterior	6	20
4	f	0	19		0.0897679	0.0897679	GE4	3	210	11	9	m9	MedPosterior	6	19
4	f	0	19		0.0640542	0.0640542	GE4	3	210	11	9	m9	MedPosterior	6	19
4	f	0	19		0.0670733	0.0670733	GE4	3	210	11	9	m9	MedPosterior	6	19
4	f	0	19		0.0626619	0.0626619	GE4	3	210	11	9	m9	MedPosterior	6	19
4	f	0	19		0.074244	0.074244	GE4	3	210	11	8	m8	MedPosterior	6	18
4	f	0	19		0.0536046	0.0536046	GE4	3	210	11	8	m8	MedPosterior	6	18
4	f	0	19		0.0933374	0.0933374	GE4	3	210	11	8	m8	MedPosterior	6	18
4	f	0	19		0.0910441	0.0910441	GE4	3	210	11	6	m6	MedPosterior	6	16
4	f	0	19		0.0736543	0.0736543	GE4	3	210	11	6	m6	MedPosterior	6	16
4	f	0	19		0.082865	0.082865	GE4	3	210	11	4/5	m4/5	MedAnterior	5	15
4	f	0	19		0.0942046	0.0942046	GE4	3	210	11	4/5	m4/5	MedAnterior	5	15
4	f	0	19		0.0884224	0.0884224	GE4	3	210	11	4/5	m4/5	MedAnterior	5	15
4	f	0	19		0.101943	0.101943	GE4	3	210	11	3	m3	MedAnterior	5	14
4	f	0	19		0.162929	0.162929	GE4	3	210	11	3	m3	MedAnterior	5	14
4	f	0	19		0.0769468	0.0769468	GE4	3	210	11	3	m3	MedAnterior	5	14
4	f	0	19		0.0658926	0.0658926	GE4	3	210	11	3	m3	MedAnterior	5	14
4	f	0	19		0.0718758	0.0718758	GE4	3	210	11	2	m2	MedAnterior	5	13
4	f	0	19		0.106139	0.106139	GE4	3	210	11	2	m2	MedAnterior	5	13
4	f	0	19		0.104324	0.104324	GE4	3	210	11	2	m2	MedAnterior	5	13
4	f	0	20	191031_1616	0.39337	0.39337	GE4	3	210	2	crus2	Lcrus2	Lateral	2	5
4	f	0	20	2	#DIV/0!		GE4	3	210	2				#N/A	#N/A
4	f	0	20	3	0.207083	0.207083	GE4	3	210	2	crus2	Lcrus2	Lateral	2	5
4	f	0	20	4	0.207849	0.207849	GE4	3	210	2	crus2	Lcrus2	Lateral	2	5
4	f	0	20	5	0.117389	0.117389	GE4	3	210	2	fl	Lfl	Vestibular	1	2
4	f	0	20	6	#DIV/0!		GE4	3	210	6	4/5	i4/5		#N/A	12
4	f	0	20	7	0.104708	0.104708	GE4	3	210	6	sim	isim	IntPosterior	4	7
4	f	0	20	8	#DIV/0!		GE4	3	210	6	crus2	icrus2		#N/A	9
4	f	0	20	9	0.104189	0.104189	GE4	3	210	6	crus2	icrus2	IntPosterior	4	9
4	f	0	20	10	#DIV/0!		GE4	3	210	6	pm	ipm		#N/A	10
4	f	0	20	11	0.0455039	0.0455039	GE4	3	210	12	10	m10	MedPosterior	6	20
4	f	0	20	12	0.108914	0.108914	GE4	3	210	12	10	m10	MedPosterior	6	20
4	f	0	20	13	0.080212	0.080212	GE4	3	210	12	9	m9	MedPosterior	6	19
4	f	0	20	14	0.0769932	0.0769932	GE4	3	210	12	9	m9	MedPosterior	6	19
4	f	0	20	15	0.0520316	0.0520316	GE4	3	210	12	9	m9	MedPosterior	6	19
4	f	0	20	16	0.245703	0.245703	GE4	3	210	12	9	m9	MedPosterior	6	19
4	f	0	20	17	#DIV/0!		GE4	3	210	12	8	m8		#N/A	18
4	f	0	20	18	0.0973819	0.0973819	GE4	3	210	12	8	m8	MedPosterior	6	18
4	f	0	20	19	0.104189	0.104189	GE4	3	210	12	7	m7	MedPosterior	6	17
4	f	0	20	20	0.0525867	0.0525867	GE4	3	210	12	7	m7	MedPosterior	6	17
4	f	0	20	21	0.0942167	0.0942167	GE4	3	210	12	6	m6	MedPosterior	6	16
4	f	0	20	22	0.0760548	0.0760548	GE4	3	210	12	6	m6	MedPosterior	6	16
4	f	0	20	23	0.0758549	0.0758549	GE4	3	210	12	6	m6	MedPosterior	6	16
4	f	0	20	24	#DIV/0!		GE4	3	210	12	4/5	m4/5		#N/A	15
4	f	0	20	25	0.0937767	0.0937767	GE4	3	210	12	4/5	m4/5	MedAnterior	5	15
4	f	0	20	26	0.0998385	0.0998385	GE4	3	210	12	4/5	m4/5	MedAnterior	5	15
4	f	0	20	27	0.295685	0.295685	GE4	3	210	12	3	m3	MedAnterior	5	14
4	f	0	20	28	0.110475	0.110475	GE4	3	210	12	3	m3	MedAnterior	5	14
4	f	0	20	29	0.140263	0.140263	GE4	3	210	12	3	m3	MedAnterior	5	14
4	f	0	20	30	0.0975012	0.0975012	GE4	3	210	12	2	m2	MedAnterior	5	13
4	f	0	20	31	0.0884731	0.0884731	GE4	3	210	12	2	m2	MedAnterior	5	13
4	f	0	20	32	0.300768	0.300768	GE4	3	210	12	2	m2	MedAnterior	5	13
4	f	0	20	33	0.0605033	0.0605033	GE4	3	210	12	2	m2	MedAnterior	5	13
4	f	0	20	34	0.0596941	0.0596941	GE4	3	210	12	2	m2	MedAnterior	5	13
4	f	0	21	191101_1575	0.402748	0.402748	GE4	3	210	6	sim	isim	IntPosterior	4	7
4	f	0	21	2	#DIV/0!		GE4	3	210	6	crus1	icrus1		#N/A	8
4	f	0	21	3	#DIV/0!		GE4	3	210	6	crus1	icrus1		#N/A	8
4	f	0	21	4	0.0843447	0.0843447	GE4	3	210	12	2	m2	MedAnterior	5	13
4	f	0	21	5	0.0984336	0.0984336	GE4	3	210	12	2	m2	MedAnterior	5	13
4	f	0	21	6	0.109158	0.109158	GE4	3	210	12	3	m3	MedAnterior	5	14
4	f	0	21	7	0.234495	0.234495	GE4	3	210	12	3	m3	MedAnterior	5	14
4	f	0	21	8	0.127942	0.127942	GE4	3	210	12	3	m3	MedAnterior	5	14
4	f	0	21	9	0.165136	0.165136	GE4	3	210	12	4/5	m4/5	MedAnterior	5	15
4	f	0	21	10	#DIV/0!		GE4	3	210	12	4/5	m4/5		#N/A	15
4	f	0	21	11	0.0963298	0.0963298	GE4	3	210	12	6	m6	MedPosterior	6	16
4	f	0	21	12	0.0673429	0.0673429	GE4	3	210	12	6	m6	MedPosterior	6	16
4	f	0	21	13	0.0999861	0.0999861	GE4	3	210	12	7	m7	MedPosterior	6	17
4	f	0	21	14	0.126518	0.126518	GE4	3	210	12	8	m8	MedPosterior	6	18
4	f	0	21	15	0.0615386	0.0615386	GE4	3	210	12	8	m8	MedPosterior	6	18
4	f	0	21	16	0.0773701	0.0773701	GE4	3	210	12	8	m8	MedPosterior	6	18
4	f	0	21	17	#DIV/0!		GE4	3	210	12	9	m9		#N/A	19
4	f	0	21	18	0.0661515	0.0661515	GE4	3	210	12	9	m9	MedPosterior	6	19
4	f	0	21	19	0.116324	0.116324	GE4	3	210	12	9	m9	MedPosterior	6	19
4	f	0	21	20	0.0812622	0.0812622	GE4	3	210	12	10	m10	MedPosterior	6	20
4	f	0	21	21	0.0684606	0.0684606	GE4	3	210	12	10	m10	MedPosterior	6	20
4	m	1	22	191111a_1642	#DIV/0!		GE4	3	210	3	crus1	Lcrus1	Lateral	2	4
4	m	1	22	2	0.276442	0.276442	GE4	3	210	3	crus1	Lcrus1	Lateral	2	4
4	m	1	22	3	0.206608	0.206608	GE4	3	210	6	crus1	icrus1	IntPosterior	4	8
4	m	1	22	4	0.0856207	0.0856207	GE4	3	210	6	crus1	icrus1	IntPosterior	4	8
4	m	1	22	5	0.154236	0.154236	GE4	3	210	6	cop	icop	IntPosterior	4	11
4	m	1	22	6	0.0945429	0.0945429	GE4	3	210	12	10	m10	MedPosterior	6	20
4	m	1	22	7	0.0523983	0.0523983	GE4	3	210	12	10	m10	MedPosterior	6	20
4	m	1	22	8	0.0556593	0.0556593	GE4	3	210	12	10	m10	MedPosterior	6	20
4	m	1	22	9	0.0834357	0.0834357	GE4	3	210	12	8	m8	MedPosterior	6	18
4	m	1	22	10	0.0709797	0.0709797	GE4	3	210	12	8	m8	MedPosterior	6	18
4	m	1	22	11	0.0643591	0.0643591	GE4	3	210	12	7	m7	MedPosterior	6	17
4	m	1	22	12	0.0789433	0.0789433	GE4	3	210	12	6	m6	MedPosterior	6	16
4	m	1	22	13	0.0504823	0.0504823	GE4	3	210	12	6	m6	MedPosterior	6	16
4	m	1	22	14	0.114298	0.114298	GE4	3	210	12	6	m6	MedPosterior	6	16
4	m	1	22	15	0.110387	0.110387	GE4	3	210	12	4/5	m4/5	MedAnterior	5	15
4	m	1	22	16	0.0797796	0.0797796	GE4	3	210	12	4/5	m4/5	MedAnterior	5	15
4	m	1	22	17	0.201163	0.201163	GE4	3	210	12	4/5	m4/5	MedAnterior	5	15
4	m	1	22	18	0.245592	0.245592	GE4	3	210	12	3	m3	MedAnterior	5	14
4	m	1	22	19	0.165431	0.165431	GE4	3	210	12	3	m3	MedAnterior	5	14
4	m	1	22	20	0.160339	0.160339	GE4	3	210	12	3	m3	MedAnterior	5	14
4	m	1	22	21	0.187619	0.187619	GE4	3	210	12	2	m2	MedAnterior	5	13
4	m	1	22	22	0.143063	0.143063	GE4	3	210	12	2	m2	MedAnterior	5	13
4	m	1	22	23	0.0897713	0.0897713	GE4	3	210	12	2	m2	MedAnterior	5	13
4	f	0	23	191111b_1645	0.258851	0.258851	GE4	3	210	3	pm	Lpm	Lateral	2	6
4	f	0	23	2	3.17983	3.17983	GE4	3	210	3	crus2	Lcrus2	Lateral	2	5
4	f	0	23	3	0.124995	0.124995	GE4	3	210	6	pm	ipm	IntPosterior	4	10
4	f	0	23	4	0.13207	0.13207	GE4	3	210	6	crus2	icrus2	IntPosterior	4	9
4	f	0	23	5	0.136748	0.136748	GE4	3	210	6	crus1	icrus1	IntPosterior	4	8
4	f	0	23	6	0.804554	0.804554	GE4	3	210	6	4/5	i4/5	IntAnterior	3	12
4	f	0	23	7	0.154925	0.154925	GE4	3	210	6	4/5	i4/5	IntAnterior	3	12
4	f	0	23	8	0.118899	0.118899	GE4	3	210	11	2	m2	MedAnterior	5	13
4	f	0	23	9	0.0771412	0.0771412	GE4	3	210	11	2	m2	MedAnterior	5	13
4	f	0	23	10	0.072794	0.072794	GE4	3	210	11	2	m2	MedAnterior	5	13
4	f	0	23	11	0.21023	0.21023	GE4	3	210	11	3	m3	MedAnterior	5	14
4	f	0	23	12	0.208473	0.208473	GE4	3	210	11	3	m3	MedAnterior	5	14
4	f	0	23	13	#DIV/0!		GE4	3	210	11				#N/A	#N/A
4	f	0	23	14	0.211828	0.211828	GE4	3	210	11	4/5	m4/5	MedAnterior	5	15
4	f	0	23	15	0.187108	0.187108	GE4	3	210	11	4/5	m4/5	MedAnterior	5	15
4	f	0	23	16	0.221939	0.221939	GE4	3	210	11	4/5	m4/5	MedAnterior	5	15
4	f	0	23	17	0.157104	0.157104	GE4	3	210	11	6	m6	MedPosterior	6	16
4	f	0	23	18	0.147073	0.147073	GE4	3	210	11	6	m6	MedPosterior	6	16
4	f	0	23	19	0.0539775	0.0539775	GE4	3	210	11	8	m8	MedPosterior	6	18
4	f	0	23	20	0.0942477	0.0942477	GE4	3	210	11	8	m8	MedPosterior	6	18
4	f	0	23	21	0.103119	0.103119	GE4	3	210	11	9	m9	MedPosterior	6	19
4	f	0	23	22	0.0720174	0.0720174	GE4	3	210	11	9	m9	MedPosterior	6	19
4	f	0	23	23	#DIV/0!		GE4	3	210	11	9	m9		#N/A	19
4	f	0	23	24	0.0380971	0.0380971	GE4	3	210	11	10	m10	MedPosterior	6	20
4	f	0	23	25	0.0964942	0.0964942	GE4	3	210	11	10	m10	MedPosterior	6	20
4	f	0	24	200102b_1004	0.431692	0.431692	GE1	4	400	3	PFl	LPFl	Vestibular	1	1
4	f	0	24	2	0.215874	0.215874	GE1	4	400	3	Sim	LSim	Lateral	2	3
4	f	0	24	3	0.0982825	0.0982825	GE1	4	400	5	PM	iPM	IntPosterior	4	10
4	f	0	24	4	0.231472	0.231472	GE1	4	400	5	Crus2	iCrus2	IntPosterior	4	9
4	f	0	24	5	1.16813	1.16813	GE1	4	400	5	Crus1	iCrus1	IntPosterior	4	8
4	f	0	24	6	0.1471	0.1471	GE1	4	400	5	Sim	iSim	IntPosterior	4	7
4	f	0	24	7	#DIV/0!		GE1	4	400	5	4/5	i4/5		#N/A	12
4	f	0	24	8	0.170601	0.170601	GE1	4	400	12	2	m2	MedAnterior	5	13
4	f	0	24	9	0.117935	0.117935	GE1	4	400	12	2	m2	MedAnterior	5	13
4	f	0	24	10	0.105157	0.105157	GE1	4	400	12	3	m3	MedAnterior	5	14
4	f	0	24	11	0.0725035	0.0725035	GE1	4	400	12	3	m3	MedAnterior	5	14
4	f	0	24	12	0.072605	0.072605	GE1	4	400	12	3	m3	MedAnterior	5	14
4	f	0	24	13	0.0862684	0.0862684	GE1	4	400	12	4/5	m4/5	MedAnterior	5	15
4	f	0	24	14	0.086877	0.086877	GE1	4	400	12	4/5	m4/5	MedAnterior	5	15
4	f	0	24	15	0.0524473	0.0524473	GE1	4	400	12	4/5	m4/5	MedAnterior	5	15
4	f	0	24	16	0.0575917	0.0575917	GE1	4	400	12	6	m6	MedPosterior	6	16
4	f	0	24	17	#DIV/0!		GE1	4	400	12				#N/A	#N/A
4	f	0	24	18	0.827086	0.827086	GE1	4	400	12	7	m7	MedPosterior	6	17
4	f	0	24	19	0.0687235	0.0687235	GE1	4	400	12	8	m8	MedPosterior	6	18
4	f	0	24	20	0.124831	0.124831	GE1	4	400	12	8	m8	MedPosterior	6	18
4	f	0	24	21	0.107474	0.107474	GE1	4	400	12	9	m9	MedPosterior	6	19
4	f	0	24	22	0.0841108	0.0841108	GE1	4	400	12	9	m9	MedPosterior	6	19
4	f	0	24	23	0.347959	0.347959	GE1	4	400	12	10	m10	MedPosterior	6	20
4	f	0	24	24	0.18295	0.18295	GE1	4	400	12	10	m10	MedPosterior	6	20
4	f	0	25	200103a_1001	0.443324	0.443324	GE1	4	400	3	PFl	LPFl	Vestibular	1	1
4	f	0	25	2	0.385513	0.385513	GE1	4	400	3	PFl	LPFl	Vestibular	1	1
4	f	0	25	3	1.69406	1.69406	GE1	4	400	3	Crus2	LCrus2	Lateral	2	5
4	f	0	25	4	0.16804	0.16804	GE1	4	400	3	Crus1	LCrus1	Lateral	2	4
4	f	0	25	5	0.982858	0.982858	GE1	4	400	6	cop	icop	IntPosterior	4	11
4	f	0	25	6	2.75272	2.75272	GE1	4	400	6	PM	iPM	IntPosterior	4	10
4	f	0	25	7	#DIV/0!		GE1	4	400	6	Crus1	iCrus1		#N/A	8
4	f	0	25	8	0.166661	0.166661	GE1	4	400	6	Crus2	iCrus2	IntPosterior	4	9
4	f	0	25	9	1.12201	1.12201	GE1	4	400	6	4/5	i4/5	IntAnterior	3	12
4	f	0	25	10	0.0933123	0.0933123	GE1	4	400	12	2	m2	MedAnterior	5	13
4	f	0	25	11	0.131467	0.131467	GE1	4	400	12	2	m2	MedAnterior	5	13
4	f	0	25	12	0.106464	0.106464	GE1	4	400	12	3	m3	MedAnterior	5	14
4	f	0	25	13	0.129469	0.129469	GE1	4	400	12	3	m3	MedAnterior	5	14
4	f	0	25	14	0.128435	0.128435	GE1	4	400	12	3	m3	MedAnterior	5	14
4	f	0	25	15	0.138854	0.138854	GE1	4	400	12	4/5	m4/5	MedAnterior	5	15
4	f	0	25	16	0.119654	0.119654	GE1	4	400	12	4/5	m4/5	MedAnterior	5	15
4	f	0	25	17	0.104628	0.104628	GE1	4	400	12	4/5	m4/5	MedAnterior	5	15
4	f	0	25	18	0.107071	0.107071	GE1	4	400	12	6	m6	MedPosterior	6	16
4	f	0	25	19	0.117481	0.117481	GE1	4	400	12	6	m6	MedPosterior	6	16
4	f	0	25	20	#DIV/0!		GE1	4	400	12	8	m8		#N/A	18
4	f	0	25	21	0.114554	0.114554	GE1	4	400	12	9	m9	MedPosterior	6	19
4	f	0	25	22	0.0395886	0.0395886	GE1	4	400	12	9	m9	MedPosterior	6	19
4	f	0	25	23	0.0660541	0.0660541	GE1	4	400	12	9	m9	MedPosterior	6	19
4	f	0	25	24	0.0860232	0.0860232	GE1	4	400	12	10	m10	MedPosterior	6	20
4	f	0	25	25	0.0521903	0.0521903	GE1	4	400	12	10	m10	MedPosterior	6	20
4	f	0	26	200105b_1003	0.089461	0.089461	GE1	4	400	3	PFl	LPFl	Vestibular	1	1
4	f	0	26	2	0.603666	0.603666	GE1	4	400	3	Fl	LFl	Vestibular	1	2
4	f	0	26	3	0.38378	0.38378	GE1	4	400	3	Crus2	LCrus2	Lateral	2	5
4	f	0	26	4	0.305599	0.305599	GE1	4	400	3	crus1	Lcrus1	Lateral	2	4
4	f	0	26	5	#DIV/0!		GE1	4	400	6	cop	icop		#N/A	11
4	f	0	26	6	0.157689	0.157689	GE1	4	400	6	crus2	icrus2	IntPosterior	4	9
4	f	0	26	7	0.251302	0.251302	GE1	4	400	6	crus1	icrus1	IntPosterior	4	8
4	f	0	26	8	#DIV/0!		GE1	4	400	6	4/5	i4/5	IntAnterior	3	12
4	f	0	26	9	0.157869	0.157869	GE1	4	400	12	2	m2	MedAnterior	5	13
4	f	0	26	10	0.203892	0.203892	GE1	4	400	12	2	m2	MedAnterior	5	13
4	f	0	26	11	0.131554	0.131554	GE1	4	400	12	3	m3	MedAnterior	5	14
4	f	0	26	12	0.120235	0.120235	GE1	4	400	12	3	m3	MedAnterior	5	14
4	f	0	26	13	0.109067	0.109067	GE1	4	400	12	4/5	m4/5	MedAnterior	5	15
4	f	0	26	14	0.102792	0.102792	GE1	4	400	12	4/5	m4/5	MedAnterior	5	15
4	f	0	26	15	0.216327	0.216327	GE1	4	400	12	4/5	m4/5	MedAnterior	5	15
4	f	0	26	16	0.322448	0.322448	GE1	4	400	12	6	m6	MedPosterior	6	16
4	f	0	26	17	0.143954	0.143954	GE1	4	400	12	6	m6	MedPosterior	6	16
4	f	0	26	18	0.114035	0.114035	GE1	4	400	12	8	m8	MedPosterior	6	18
4	f	0	26	19	0.189921	0.189921	GE1	4	400	12	9	m9	MedPosterior	6	19
4	f	0	26	20	0.0500165	0.0500165	GE1	4	400	12	10	m10	MedPosterior	6	20
4	f	0	26	21	0.0985339	0.0985339	GE1	4	400	12	10	m10	MedPosterior	6	20
4	f	0	27	200109_1024	0.10004	0.10004	GE1	4	400	3	PFl	LPFl	Vestibular	1	1
4	f	0	27	2	0.165695	0.165695	GE1	4	400	3	PM	LPM	Lateral	2	6
4	f	0	27	3	0.245604	0.245604	GE1	4	400	3	Crus2	LCrus2	Lateral	2	5
4	f	0	27	4	0.744923	0.744923	GE1	4	400	3	crus1	Lcrus1	Lateral	2	4
4	f	0	27	5	#DIV/0!		GE1	4	400	3	Sim	LSim		#N/A	3
4	f	0	27	6	#DIV/0!		GE1	4	400	6	4/5	i4/5		#N/A	12
4	f	0	27	7	0.134806	0.134806	GE1	4	400	6	sim	isim	IntPosterior	4	7
4	f	0	27	8	#DIV/0!		GE1	4	400	6				#N/A	#N/A
4	f	0	27	9	0.151535	0.151535	GE1	4	400	6	pm	ipm	IntPosterior	4	10
4	f	0	27	10	0.108519	0.108519	GE1	4	400	12	2	m2	MedAnterior	5	13
4	f	0	27	11	0.0815128	0.0815128	GE1	4	400	12	2	m2	MedAnterior	5	13
4	f	0	27	12	0.230596	0.230596	GE1	4	400	12	3	m3	MedAnterior	5	14
4	f	0	27	13	0.118051	0.118051	GE1	4	400	12	3	m3	MedAnterior	5	14
4	f	0	27	14	0.170552	0.170552	GE1	4	400	12	4/5	m4/5	MedAnterior	5	15
4	f	0	27	15	0.127385	0.127385	GE1	4	400	12	4/5	m4/5	MedAnterior	5	15
4	f	0	27	16	0.260285	0.260285	GE1	4	400	12	4/5	m4/5	MedAnterior	5	15
4	f	0	27	17	0.0633273	0.0633273	GE1	4	400	12	6	m6	MedPosterior	6	16
4	f	0	27	18	0.121156	0.121156	GE1	4	400	12	6	m6	MedPosterior	6	16
4	f	0	27	19	0.107632	0.107632	GE1	4	400	12	8	m8	MedPosterior	6	18
4	f	0	27	20	0.0886979	0.0886979	GE1	4	400	12	8	m8	MedPosterior	6	18
4	f	0	27	21	0.0581055	0.0581055	GE1	4	400	12	9	m9	MedPosterior	6	19
4	f	0	27	22	0.0570578	0.0570578	GE1	4	400	12	9	m9	MedPosterior	6	19
4	f	0	27	23	0.104796	0.104796	GE1	4	400	12	9	m9	MedPosterior	6	19
4	f	0	27	24	0.0483519	0.0483519	GE1	4	400	12	10	m10	MedPosterior	6	20
4	f	0	27	25	0.0314466	0.0314466	GE1	4	400	12	10	m10	MedPosterior	6	20
4	m	1	28	200114_1104	0.0706401	0.0706401	GE1	4	400	3	Fl	LFl	Vestibular	1	2
4	m	1	28	2	0.0718645	0.0718645	GE1	4	400	3	Fl	LFl	Vestibular	1	2
4	m	1	28	3	#DIV/0!		GE1	4	400	3	PFl	LPFl		#N/A	1
4	m	1	28	4	0.373026	0.373026	GE1	4	400	3	crus1	Lcrus1	Lateral	2	4
4	m	1	28	5	#DIV/0!		GE1	4	400	3				#N/A	#N/A
4	m	1	28	6	0.489267	0.489267	GE1	4	400	3	crus2	Lcrus2	Lateral	2	5
4	m	1	28	7	0.201492	0.201492	GE1	4	400	6	sim	isim	IntPosterior	4	7
4	m	1	28	8	16.8523	16.8523	GE1	4	400	6	crus1	icrus1	IntPosterior	4	8
4	m	1	28	9	0.0999773	0.0999773	GE1	4	400	6	crus2	icrus2	IntPosterior	4	9
4	m	1	28	10	0.100481	0.100481	GE1	4	400	6	PM	iPM	IntPosterior	4	10
4	m	1	28	11	0.0809403	0.0809403	GE1	4	400	12	2	m2	MedAnterior	5	13
4	m	1	28	12	0.07864	0.07864	GE1	4	400	12	2	m2	MedAnterior	5	13
4	m	1	28	13	0.0699738	0.0699738	GE1	4	400	12	3	m3	MedAnterior	5	14
4	m	1	28	14	0.0797937	0.0797937	GE1	4	400	12	3	m3	MedAnterior	5	14
4	m	1	28	15	0.106848	0.106848	GE1	4	400	12	3	m3	MedAnterior	5	14
4	m	1	28	16	0.10157	0.10157	GE1	4	400	12	4/5	m4/5	MedAnterior	5	15
4	m	1	28	17	0.121341	0.121341	GE1	4	400	12	4/5	m4/5	MedAnterior	5	15
4	m	1	28	18	0.0684637	0.0684637	GE1	4	400	12	4/5	m4/5	MedAnterior	5	15
4	m	1	28	19	0.0650218	0.0650218	GE1	4	400	12	6	m6	MedPosterior	6	16
4	m	1	28	20	0.0694475	0.0694475	GE1	4	400	12	6	m6	MedPosterior	6	16
4	m	1	28	21	0.107294	0.107294	GE1	4	400	12	7	m7	MedPosterior	6	17
4	m	1	28	22	0.0973465	0.0973465	GE1	4	400	12	8	m8	MedPosterior	6	18
4	m	1	28	23	0.0823738	0.0823738	GE1	4	400	12	8	m8	MedPosterior	6	18
4	m	1	28	24	0.0460732	0.0460732	GE1	4	400	12	9	m9	MedPosterior	6	19
4	m	1	28	25	0.0529011	0.0529011	GE1	4	400	12	9	m9	MedPosterior	6	19
4	m	1	28	26	0.0618286	0.0618286	GE1	4	400	12	9	m9	MedPosterior	6	19
4	m	1	28	27	0.14511	0.14511	GE1	4	400	12	10	m10	MedPosterior	6	20
4	m	1	28	28	0.0764829	0.0764829	GE1	4	400	12	10	m10	MedPosterior	6	20
4	m	1	29	200115a_1049	0.0469928	0.0469928	GE1	4	400	2	Fl	LFl	Vestibular	1	2
4	m	1	29	2	0.220843	0.220843	GE1	4	400	3	crus1	Lcrus1	Lateral	2	4
4	m	1	29	3	0.255594	0.255594	GE1	4	400	3	crus2	Lcrus2	Lateral	2	5
4	m	1	29	4	0.19454	0.19454	GE1	4	400	6	4/5	i4/5	IntAnterior	3	12
4	m	1	29	5	0.151689	0.151689	GE1	4	400	6	crus1	icrus1	IntPosterior	4	8
4	m	1	29	6	0.0745309	0.0745309	GE1	4	400	6	crus2	icrus2	IntPosterior	4	9
4	m	1	29	7	0.0704821	0.0704821	GE1	4	400	6	PM	iPM	IntPosterior	4	10
4	m	1	29	8	0.120157	0.120157	GE1	4	400	6	cop	icop	IntPosterior	4	11
4	m	1	29	9	0.0647159	0.0647159	GE1	4	400	12	2	m2	MedAnterior	5	13
4	m	1	29	10	0.0871474	0.0871474	GE1	4	400	12	2	m2	MedAnterior	5	13
4	m	1	29	11	0.0887125	0.0887125	GE1	4	400	12	3	m3	MedAnterior	5	14
4	m	1	29	12	0.075003	0.075003	GE1	4	400	12	3	m3	MedAnterior	5	14
4	m	1	29	13	0.159802	0.159802	GE1	4	400	12	4/5	m4/5	MedAnterior	5	15
4	m	1	29	14	0.176566	0.176566	GE1	4	400	12	4/5	m4/5	MedAnterior	5	15
4	m	1	29	15	0.241482	0.241482	GE1	4	400	12	6	m6	MedPosterior	6	16
4	m	1	29	16	#DIV/0!		GE1	4	400	12	6	m6	MedPosterior	6	16
4	m	1	29	17	0.0941558	0.0941558	GE1	4	400	12	7	m7	MedPosterior	6	17
4	m	1	29	18	0.129836	0.129836	GE1	4	400	12	8	m8	MedPosterior	6	18
4	m	1	29	19	0.0860716	0.0860716	GE1	4	400	12	9	m9	MedPosterior	6	19
4	m	1	29	20	0.0723212	0.0723212	GE1	4	400	12	9	m9	MedPosterior	6	19
4	m	1	29	21	0.0627467	0.0627467	GE1	4	400	12	9	m9	MedPosterior	6	19
4	m	1	29	22	0.039256	0.039256	GE1	4	400	12	10	m10	MedPosterior	6	20
4	m	1	29	23	0.0907356	0.0907356	GE1	4	400	12	10	m10	MedPosterior	6	20
4	m	1	30	200116_1069	#DIV/0!		GE1	4	400	3	Fl	LFl	Vestibular	1	2
4	m	1	30	2	0.11285	0.11285	GE1	4	400	3	PFl	LPFl	Vestibular	1	1
4	m	1	30	3	#DIV/0!		GE1	4	400	3	PM	LPM		#N/A	6
4	m	1	30	4	0.291928	0.291928	GE1	4	400	3	Crus2	LCrus2	Lateral	2	5
4	m	1	30	5	0.3128	0.3128	GE1	4	400	3	sim	Lsim	Lateral	2	3
4	m	1	30	6	0.124399	0.124399	GE1	4	400	3	sim	Lsim	Lateral	2	3
4	m	1	30	7	0.160921	0.160921	GE1	4	400	6	4/5	i4/5	IntAnterior	3	12
4	m	1	30	8	0.0894147	0.0894147	GE1	4	400	6	sim	isim	IntPosterior	4	7
4	m	1	30	9	0.130381	0.130381	GE1	4	400	6	crus1	icrus1	IntPosterior	4	8
4	m	1	30	10	#DIV/0!		GE1	4	400	6	PM	iPM		#N/A	10
4	m	1	30	11	0.0441778	0.0441778	GE1	4	400	12	10	m10	MedPosterior	6	20
4	m	1	30	12	0.0769711	0.0769711	GE1	4	400	12	9	m9	MedPosterior	6	19
4	m	1	30	13	0.122098	0.122098	GE1	4	400	12	9	m9	MedPosterior	6	19
4	m	1	30	14	0.0800583	0.0800583	GE1	4	400	12	9	m9	MedPosterior	6	19
4	m	1	30	15	0.138376	0.138376	GE1	4	400	12	8	m8	MedPosterior	6	18
4	m	1	30	16	0.143055	0.143055	GE1	4	400	12	6	m6	MedPosterior	6	16
4	m	1	30	17	0.133721	0.133721	GE1	4	400	12	6	m6	MedPosterior	6	16
4	m	1	30	18	0.123389	0.123389	GE1	4	400	12	4/5	m4/5	MedAnterior	5	15
4	m	1	30	19	0.196605	0.196605	GE1	4	400	12	4/5	m4/5	MedAnterior	5	15
4	m	1	30	20	0.195364	0.195364	GE1	4	400	12	4/5	m4/5	MedAnterior	5	15
4	m	1	30	21	0.170867	0.170867	GE1	4	400	12	3	m3	MedAnterior	5	14
4	m	1	30	22	0.0786241	0.0786241	GE1	4	400	12	3	m3	MedAnterior	5	14
4	m	1	30	23	0.101717	0.101717	GE1	4	400	12	2	m2	MedAnterior	5	13
4	m	1	30	24	0.0988531	0.0988531	GE1	4	400	12	2	m2	MedAnterior	5	13

## Sheet: AtmN Wt; Aptx- -
AtmN/Wt; Aptx-/-			Total # of animals	10
Genotype	sex	sex code (1=m)	sex code (1=m)	Exp. Date_Animal ID	Average frequency	Average frequency	Group	Age	Age days	slice	folia	Position name	Region name	Gross Region ID	Position ID								1-5 vs 6-10
5	m	1	1	191119_1665	0.760916	0.760916	GE4	3	210	3	crus1	Lcrus1	Lateral	2	4		All time points												m					f
5	m	1	1	2	0.644683	0.644683	GE4	3	210	3	crus2	Lcrus2	Lateral	2	5		By Position ID	average	stdev	n	sem		By major regions	average	stdev	n	sem		average	stdev	n	sem		average	stdev	n	sem
5	m	1	1	3	0.0981803	0.0981803	GE4	3	210	3	crus2	Lcrus2	Lateral	2	5		Lpfl	0.245253	0.0763451	4	0.0381726	1	Vestibular	0.162279	0.107673	11	0.0324648	1	0.20693	0.111078	7	0.0419836		0.124709	0.0907332	4	0.0453666
5	m	1	1	4	0.219511	0.219511	GE4	3	210	6	cop	icop	IntPosterior	4	11		Lfl	0.138048	0.10739	7	0.0405895	2	Lateral	0.261987	0.292938	23	0.0610818	2	0.346087	0.261061	15	0.0674056		0.366286	0.364812	8	0.128981
5	m	1	1	5	0.0911272	0.0911272	GE4	3	210	6	crus2	icrus2	IntPosterior	4	9		Lsim	0.338857	0.387974	7	0.14664	3	IntAnterior	0.175582	0.114971	5	0.0514168	3	0.131967	0.0465713	3	0.026888		0.328795	0.0452365	2	0.0319871
5	m	1	1	6	0.204864	0.204864	GE4	3	210	6	crus1	icrus1	IntPosterior	4	8		Lcrus1	0.430248	0.302157	8	0.106829	4	IntPosterior	0.204379	0.206498	24	0.0421513	4	0.281031	0.219295	19	0.0503096		0.158357	0.117861	5	0.0527091
5	m	1	1	7	0.0638865	0.0638865	GE4	3	210	6	sim	isim	IntPosterior	4	7		Lcrus2	0.29297	0.213115	6	0.0870038	5	MedAnterior	0.130832	0.0801886	79	0.00902192	5	0.134571	0.0775327	56	0.0103607		0.133105	0.0881371	23	0.0183779
5	m	1	1	8	#DIV/0!		GE4	3	210	6	4/5	i4/5	IntAnterior	3	12		Lpm	0.274895	0.188678	2	0.133416	6	MedPosterior	0.110029	0.0835592	79	0.00940114	6	0.119292	0.0849844	58	0.011159		0.115882	0.0814721	21	0.0177787
5	m	1	1	9	0.073821	0.073821	GE4	3	210	11	2	m2	MedAnterior	5	13		isim	0.241557	0.184508	6	0.0753253	7
5	m	1	1	10	0.0717677	0.0717677	GE4	3	210	11	2	m2	MedAnterior	5	13		icrus1	0.280436	0.264864	4	0.132432	8
5	m	1	1	11	0.0855568	0.0855568	GE4	3	210	11	2	m2	MedAnterior	5	13		icrus2	0.0945092	0.00767966	3	0.00443385	9
5	m	1	1	12	0.0906286	0.0906286	GE4	3	210	11	2	m2	MedAnterior	5	13		ipm	0.220934	0.169013	8	0.0597552	10
5	m	1	1	13	0.161485	0.161485	GE4	3	210	11	2	m2	MedAnterior	5	13		icop	0.503095	0.250127	3	0.144411	11
5	m	1	1	14	0.239637	0.239637	GE4	3	210	11	3	m3	MedAnterior	5	14		i4/5	0.210698	0.114971	5	0.0514168	12
5	m	1	1	15	0.267495	0.267495	GE4	3	210	11	3	m3	MedAnterior	5	14		m2	0.117464	0.0936267	27	0.0180185	13
5	m	1	1	16	0.202443	0.202443	GE4	3	210	11	4/5	m4/5	MedAnterior	5	15		m3	0.151073	0.0750377	26	0.0147161	14
5	m	1	1	17	0.155717	0.155717	GE4	3	210	11	4/5	m4/5	MedAnterior	5	15		m4/5	0.134537	0.0686757	26	0.0134684	15
5	m	1	1	18	0.132665	0.132665	GE4	3	210	11	4/5	m4/5	MedAnterior	5	15		m6	0.116894	0.0578997	21	0.0126347	16
5	m	1	1	19	0.149155	0.149155	GE4	3	210	11	6	m6	MedPosterior	6	16		m7	0.0954234	0.0479775	4	0.0239887	17
5	m	1	1	20	0.129225	0.129225	GE4	3	210	11	6	m6	MedPosterior	6	16		m8	0.109037	0.065182	17	0.015809	18
5	m	1	1	21	0.328999	0.328999	GE4	3	210	11	8	m8	MedPosterior	6	18		m9	0.0985833	0.0476732	19	0.010937	19
5	m	1	1	22	0.14901	0.14901	GE4	3	210	11	8	m8	MedPosterior	6	18		m10	0.154959	0.138606	18	0.0326697	20
5	m	1	1	23	0.139134	0.139134	GE4	3	210	11	9	m9	MedPosterior	6	19
5	m	1	1	24	0.150798	0.150798	GE4	3	210	11	9	m9	MedPosterior	6	19
5	m	1	1	25	0.136967	0.136967	GE4	3	210	11	10	m10	MedPosterior	6	20
5	m	1	1	26	0.101756	0.101756	GE4	3	210	11	10	m10	MedPosterior	6	20
5	m	1	2	191126_861	0.117088	0.117088	GE1	4	400	3	fl	Lfl	Vestibular	1	2
5	m	1	2	2	0.14188	0.14188	GE1	4	400	3	fl	Lfl	Vestibular	1	2
5	m	1	2	3	0.156429	0.156429	GE1	4	400	3	pfl	Lpfl	Vestibular	1	1
5	m	1	2	4	0.692305	0.692305	GE1	4	400	6	cop	icop	IntPosterior	4	11
5	m	1	2	5	0.17296	0.17296	GE1	4	400	6	pm	ipm	IntPosterior	4	10
5	m	1	2	6	0.0875708	0.0875708	GE1	4	400	11	2	m2	MedAnterior	5	13
5	m	1	2	7	0.120941	0.120941	GE1	4	400	11	2	m2	MedAnterior	5	13
5	m	1	2	8	0.0735348	0.0735348	GE1	4	400	11	2	m2	MedAnterior	5	13
5	m	1	2	9	0.0846844	0.0846844	GE1	4	400	11	3	m3	MedAnterior	5	14
5	m	1	2	10	0.120401	0.120401	GE1	4	400	11	3	m3	MedAnterior	5	14
5	m	1	2	11	0.102435	0.102435	GE1	4	400	11	3	m3	MedAnterior	5	14
5	m	1	2	12	0.0787248	0.0787248	GE1	4	400	11	4/5	m4/5	MedAnterior	5	15
5	m	1	2	13	0.173625	0.173625	GE1	4	400	11	4/5	m4/5	MedAnterior	5	15
5	m	1	2	14	0.154948	0.154948	GE1	4	400	11	4/5	m4/5	MedAnterior	5	15
5	m	1	2	15	0.115403	0.115403	GE1	4	400	11	6	m6	MedPosterior	6	16		GE2	45 days											m					f
5	m	1	2	16	0.0724987	0.0724987	GE1	4	400	11	6	m6	MedPosterior	6	16		By Position ID	average	stdev	n	sem		By major regions	average	stdev	n	sem		average	stdev	n	sem		average	stdev	n	sem
5	m	1	2	17	0.0984635	0.0984635	GE1	4	400	11	8	m8	MedPosterior	6	18		Lpfl	#DIV/0!	#DIV/0!	0	#DIV/0!		Vestibular	#DIV/0!	#DIV/0!	0	#DIV/0!		#DIV/0!	#DIV/0!	0	#DIV/0!		#DIV/0!	#DIV/0!	0	#DIV/0!
5	m	1	2	18	0.0649624	0.0649624	GE1	4	400	11	8	m8	MedPosterior	6	18		Lfl	#DIV/0!	#DIV/0!	0	#DIV/0!		Lateral	#DIV/0!	#DIV/0!	0	#DIV/0!		#DIV/0!	#DIV/0!	0	#DIV/0!		#DIV/0!	#DIV/0!	0	#DIV/0!
5	m	1	2	19	0.179287	0.179287	GE1	4	400	11	9	m9	MedPosterior	6	19		Lsim	#DIV/0!	#DIV/0!	0	#DIV/0!		IntAnterior	#DIV/0!	#DIV/0!	0	#DIV/0!		#DIV/0!	#DIV/0!	0	#DIV/0!		#DIV/0!	#DIV/0!	0	#DIV/0!
5	m	1	2	20	0.081008	0.081008	GE1	4	400	11	9	m9	MedPosterior	6	19		Lcrus1	#DIV/0!	#DIV/0!	0	#DIV/0!		IntPosterior	#DIV/0!	#DIV/0!	0	#DIV/0!		#DIV/0!	#DIV/0!	0	#DIV/0!		#DIV/0!	#DIV/0!	0	#DIV/0!
5	m	1	2	21	0.0867964	0.0867964	GE1	4	400	11	10	m10	MedPosterior	6	20		Lcrus2	#DIV/0!	#DIV/0!	0	#DIV/0!		MedAnterior	#DIV/0!	#DIV/0!	0	#DIV/0!		#DIV/0!	#DIV/0!	0	#DIV/0!		#DIV/0!	#DIV/0!	0	#DIV/0!
5	m	1	2	22	0.0635536	0.0635536	GE1	4	400	11	10	m10	MedPosterior	6	20		Lpm	#DIV/0!	#DIV/0!	0	#DIV/0!		MedPosterior	#DIV/0!	#DIV/0!	0	#DIV/0!		#DIV/0!	#DIV/0!	0	#DIV/0!		#DIV/0!	#DIV/0!	0	#DIV/0!
5	m	1	3	191127_862	0.340298	0.340298	GE1	4	400	2	pfl	Lpfl	Vestibular	1	1		isim	#DIV/0!	#DIV/0!	0	#DIV/0!
5	m	1	3	2	#DIV/0!		GE1	4	400	2	crus1	Lcrus1	Lateral	2	4		icrus1	#DIV/0!	#DIV/0!	0	#DIV/0!
5	m	1	3	3	0.582152	0.582152	GE1	4	400	6	pm	ipm	IntPosterior	4	10		icrus2	#DIV/0!	#DIV/0!	0	#DIV/0!
5	m	1	3	4	#DIV/0!		GE1	4	400	6	crus2	icrus2	IntPosterior	4	9		ipm	#DIV/0!	#DIV/0!	0	#DIV/0!
5	m	1	3	5	0.185373	0.185373	GE1	4	400	6	sim	isim	IntPosterior	4	7		icop	#DIV/0!	#DIV/0!	0	#DIV/0!
5	m	1	3	6	0.161128	0.161128	GE1	4	400	12	2	m2	MedAnterior	5	13		i4/5	#DIV/0!	#DIV/0!	0	#DIV/0!
5	m	1	3	7	0.194813	0.194813	GE1	4	400	12	2	m2	MedAnterior	5	13		m2	#DIV/0!	#DIV/0!	0	#DIV/0!
5	m	1	3	8	0.0974497	0.0974497	GE1	4	400	12	3	m3	MedAnterior	5	14		m3	#DIV/0!	#DIV/0!	0	#DIV/0!
5	m	1	3	9	0.239858	0.239858	GE1	4	400	12	3	m3	MedAnterior	5	14		m4/5	#DIV/0!	#DIV/0!	0	#DIV/0!
5	m	1	3	10	0.252121	0.252121	GE1	4	400	12	3	m3	MedAnterior	5	14		m6	#DIV/0!	#DIV/0!	0	#DIV/0!
5	m	1	3	11	0.141987	0.141987	GE1	4	400	12	4/5	m4/5	MedAnterior	5	15		m7	#DIV/0!	#DIV/0!	0	#DIV/0!
5	m	1	3	12	0.0808342	0.0808342	GE1	4	400	12	4/5	m4/5	MedAnterior	5	15		m8	#DIV/0!	#DIV/0!	0	#DIV/0!
5	m	1	3	13	0.0843709	0.0843709	GE1	4	400	12	6	m6	MedPosterior	6	16		m9	#DIV/0!	#DIV/0!	0	#DIV/0!
5	m	1	3	14	0.31391	0.31391	GE1	4	400	12	6	m6	MedPosterior	6	16		m10	#DIV/0!	#DIV/0!	0	#DIV/0!
5	m	1	3	15	0.0789183	0.0789183	GE1	4	400	12	6	m6	MedPosterior	6	16
5	m	1	3	16	#DIV/0!		GE1	4	400	12	7	m7	MedPosterior	6	17
5	m	1	3	17	0.0672294	0.0672294	GE1	4	400	12	8	m8	MedPosterior	6	18
5	m	1	3	18	#DIV/0!		GE1	4	400	12	9	m9	MedPosterior	6	19
5	m	1	3	19	0.0619317	0.0619317	GE1	4	400	12	9	m9	MedPosterior	6	19
5	m	1	3	20	0.0723996	0.0723996	GE1	4	400	12	10	m10	MedPosterior	6	20
5	m	1	3	21	0.167527	0.167527	GE1	4	400	12	10	m10	MedPosterior	6	20
5	m	1	4	191209_896	0.0928313	0.0928313	GE1	4	400	3	Fl	LFl	Vestibular	1	2
5	m	1	4	2	0.29573	0.29573	GE1	4	400	3	Crus2	LCrus2	Lateral	2	5
5	m	1	4	3	0.60378	0.60378	GE1	4	400	3	crus1	Lcrus1	Lateral	2	4
5	m	1	4	4	0.153085	0.153085	GE1	4	400	3	sim	Lsim	Lateral	2	3
5	m	1	4	5	0.0838292	0.0838292	GE1	4	400	6	4/5	i4/5	IntAnterior	3	12
5	m	1	4	6	0.430015	0.430015	GE1	4	400	6	sim	isim	IntPosterior	4	7
5	m	1	4	7	0.103299	0.103299	GE1	4	400	6	Crus2	iCrus2	IntPosterior	4	9
5	m	1	4	8	#DIV/0!		GE1	4	400	6	cop	icop	IntPosterior	4	11
5	m	1	4	9	0.0708883	0.0708883	GE1	4	400	12	10	m10	MedPosterior	6	20
5	m	1	4	10	0.0848393	0.0848393	GE1	4	400	12	10	m10	MedPosterior	6	20
5	m	1	4	11	0.0856694	0.0856694	GE1	4	400	12	9	m9	MedPosterior	6	19
5	m	1	4	12	0.152655	0.152655	GE1	4	400	12	9	m9	MedPosterior	6	19
5	m	1	4	13	0.0751444	0.0751444	GE1	4	400	12	8	m8	MedPosterior	6	18		GE3	110 days											m	N	0			f	N	0
5	m	1	4	14	0.113278	0.113278	GE1	4	400	12	8	m8	MedPosterior	6	18		By Position ID	average	stdev	n	sem		By major regions	average	stdev	n	sem		average	stdev	n	sem		average	stdev	n	sem
5	m	1	4	15	0.0779345	0.0779345	GE1	4	400	12	8	m8	MedPosterior	6	18		Lpfl	#DIV/0!	#DIV/0!	0	#DIV/0!		Vestibular	#DIV/0!	#DIV/0!	0	#DIV/0!		#DIV/0!	#DIV/0!	0	#DIV/0!		#DIV/0!	#DIV/0!	0	#DIV/0!
5	m	1	4	16	0.0878693	0.0878693	GE1	4	400	12	6	m6	MedPosterior	6	16		Lfl	#DIV/0!	#DIV/0!	0	#DIV/0!		Lateral	#DIV/0!	#DIV/0!	0	#DIV/0!		#DIV/0!	#DIV/0!	0	#DIV/0!		#DIV/0!	#DIV/0!	0	#DIV/0!
5	m	1	4	17	0.0869289	0.0869289	GE1	4	400	12	6	m6	MedPosterior	6	16		Lsim	#DIV/0!	#DIV/0!	0	#DIV/0!		IntAnterior	#DIV/0!	#DIV/0!	0	#DIV/0!		#DIV/0!	#DIV/0!	0	#DIV/0!		#DIV/0!	#DIV/0!	0	#DIV/0!
5	m	1	4	18	0.15394	0.15394	GE1	4	400	12	4/5	m4/5	MedAnterior	5	15		Lcrus1	#DIV/0!	#DIV/0!	0	#DIV/0!		IntPosterior	#DIV/0!	#DIV/0!	0	#DIV/0!		#DIV/0!	#DIV/0!	0	#DIV/0!		#DIV/0!	#DIV/0!	0	#DIV/0!
5	m	1	4	19	0.104661	0.104661	GE1	4	400	12	4/5	m4/5	MedAnterior	5	15		Lcrus2	#DIV/0!	#DIV/0!	0	#DIV/0!		MedAnterior	#DIV/0!	#DIV/0!	0	#DIV/0!		#DIV/0!	#DIV/0!	0	#DIV/0!		#DIV/0!	#DIV/0!	0	#DIV/0!
5	m	1	4	20	0.0659514	0.0659514	GE1	4	400	12	4/5	m4/5	MedAnterior	5	15		Lpm	#DIV/0!	#DIV/0!	0	#DIV/0!		MedPosterior	#DIV/0!	#DIV/0!	0	#DIV/0!		#DIV/0!	#DIV/0!	0	#DIV/0!		#DIV/0!	#DIV/0!	0	#DIV/0!
5	m	1	4	21	0.0928835	0.0928835	GE1	4	400	12	3	m3	MedAnterior	5	14		isim	#DIV/0!	#DIV/0!	0	#DIV/0!
5	m	1	4	22	0.840788	0.840788	GE1	4	400	12				#N/A	#N/A		icrus1	#DIV/0!	#DIV/0!	0	#DIV/0!
5	m	1	4	23	0.0979038	0.0979038	GE1	4	400	12	3	m3	MedAnterior	5	14		icrus2	#DIV/0!	#DIV/0!	0	#DIV/0!
5	m	1	4	24	0.105881	0.105881	GE1	4	400	12	3	m3	MedAnterior	5	14		ipm	#DIV/0!	#DIV/0!	0	#DIV/0!
5	m	1	4	25	0.0639796	0.0639796	GE1	4	400	12	2	m2	MedAnterior	5	13		icop	#DIV/0!	#DIV/0!	0	#DIV/0!
5	m	1	4	26	0.0605192	0.0605192	GE1	4	400	12	2	m2	MedAnterior	5	13		i4/5	#DIV/0!	#DIV/0!	0	#DIV/0!
5	m	1	4	27	0.0657299	0.0657299	GE1	4	400	12	2	m2	MedAnterior	5	13		m2	#DIV/0!	#DIV/0!	0	#DIV/0!
5	m	1	5	191211a_893	0.218833	0.218833	GE1	4	400	3	sim	Lsim	Lateral	2	3		m3	#DIV/0!	#DIV/0!	0	#DIV/0!
5	m	1	5	2	#DIV/0!		GE1	4	400	3	Crus1	LCrus1	Lateral	2	4		m4/5	#DIV/0!	#DIV/0!	0	#DIV/0!
5	m	1	5	3	0.201693	0.201693	GE1	4	400	3	Crus1	LCrus1	Lateral	2	4		m6	#DIV/0!	#DIV/0!	0	#DIV/0!
5	m	1	5	4	#DIV/0!		GE1	4	400	3	Crus2	LCrus2	Lateral	2	5		m7	#DIV/0!	#DIV/0!	0	#DIV/0!
5	m	1	5	5	#DIV/0!		GE1	4	400	3	Crus2	LCrus2	Lateral	2	5		m8	#DIV/0!	#DIV/0!	0	#DIV/0!
5	m	1	5	6	0.176795	0.176795	GE1	4	400	6	4/5	i4/5	IntAnterior	3	12		m9	#DIV/0!	#DIV/0!	0	#DIV/0!
5	m	1	5	7	0.511408	0.511408	GE1	4	400	6	sim	isim	IntPosterior	4	7		m10	#DIV/0!	#DIV/0!	0	#DIV/0!
5	m	1	5	8	0.672926	0.672926	GE1	4	400	6	Crus1	iCrus1	IntPosterior	4	8
5	m	1	5	9	#DIV/0!		GE1	4	400	6	Crus2	iCrus2	IntPosterior	4	9
5	m	1	5	10	0.10675	0.10675	GE1	4	400	6	PM	iPM	IntPosterior	4	10
5	m	1	5	11	0.597471	0.597471	GE1	4	400	6	Cop	iCop	IntPosterior	4	11
5	m	1	5	12	0.43096	0.43096	GE1	4	400	12	10	m10	MedPosterior	6	20
5	m	1	5	13	0.0956881	0.0956881	GE1	4	400	12	10	m10	MedPosterior	6	20
5	m	1	5	14	0.0559898	0.0559898	GE1	4	400	12	9	m9	MedPosterior	6	19
5	m	1	5	15	0.0482664	0.0482664	GE1	4	400	12	9	m9	MedPosterior	6	19
5	m	1	5	16	0.0568462	0.0568462	GE1	4	400	12	9	m9	MedPosterior	6	19
5	m	1	5	17	0.120848	0.120848	GE1	4	400	12	8	m8	MedPosterior	6	18
5	m	1	5	18	0.0843161	0.0843161	GE1	4	400	12	8	m8	MedPosterior	6	18
5	m	1	5	19	0.0596894	0.0596894	GE1	4	400	12	7	m7	MedPosterior	6	17
5	m	1	5	20	0.109918	0.109918	GE1	4	400	12	6	m6	MedPosterior	6	16
5	m	1	5	21	0.109985	0.109985	GE1	4	400	12	6	m6	MedPosterior	6	16
5	m	1	5	22	0.142535	0.142535	GE1	4	400	12	4/5	m4/5	MedAnterior	5	15
5	m	1	5	23	0.0925398	0.0925398	GE1	4	400	12	4/5	m4/5	MedAnterior	5	15
5	m	1	5	24	0.112154	0.112154	GE1	4	400	12	4/5	m4/5	MedAnterior	5	15
5	m	1	5	25	0.068047	0.068047	GE1	4	400	12	3	m3	MedAnterior	5	14
5	m	1	5	26	0.144497	0.144497	GE1	4	400	12	3	m3	MedAnterior	5	14		GE4	220 days											m	N	1			f	N	0
5	m	1	5	27	0.131627	0.131627	GE1	4	400	12	2	m2	MedAnterior	5	13		By Position ID	average	stdev	n	sem		By major regions	average	stdev	n	sem		average	stdev	n	sem		average	stdev	n	sem
5	m	1	5	28	0.099066	0.099066	GE1	4	400	12	2	m2	MedAnterior	5	13		Lpfl	#DIV/0!	#DIV/0!	0	#DIV/0!		Vestibular	#DIV/0!	#DIV/0!	0	#DIV/0!		#DIV/0!	#DIV/0!	0	#DIV/0!		#DIV/0!	#DIV/0!	0	#DIV/0!
5	m	1	5	29	0.0769845	0.0769845	GE1	4	400	12	2	m2	MedAnterior	5	13		Lfl	#DIV/0!	#DIV/0!	0	#DIV/0!		Lateral	0.50126	0.353882	3	0.204314		0.50126	0.353882	3	0.204314		#DIV/0!	#DIV/0!	0	#DIV/0!
5	m	1	5	30	0.0785845	0.0785845	GE1	4	400	12	2	m2	MedAnterior	5	13		Lsim	#DIV/0!	#DIV/0!	0	#DIV/0!		IntAnterior	#DIV/0!	#DIV/0!	0	#DIV/0!		#DIV/0!	#DIV/0!	0	#DIV/0!		#DIV/0!	#DIV/0!	0	#DIV/0!
5	f	0	6	191211b_892	0.0625266	0.0625266	GE1	4	400	3	Fl	LFl	Vestibular	1	2		Lcrus1	0.760916	#DIV/0!	1	#DIV/0!		IntPosterior	0.144847	0.0787764	4	0.0393882		0.144847	0.0787764	4	0.0393882		#DIV/0!	#DIV/0!	0	#DIV/0!
5	f	0	6	2	#DIV/0!		GE1	4	400	3	Fl	LFl	Vestibular	1	2		Lcrus2	0.371431	0.386436	2	0.273251		MedAnterior	0.148122	0.0704125	10	0.0222664		0.148122	0.0704125	10	0.0222664		#DIV/0!	#DIV/0!	0	#DIV/0!
5	f	0	6	3	0.194284	0.194284	GE1	4	400	3	sim	Lsim	Lateral	2	3		Lpm	#DIV/0!	#DIV/0!	0	#DIV/0!		MedPosterior	0.160631	0.0698833	8	0.0247075		0.160631	0.0698833	8	0.0247075		#DIV/0!	#DIV/0!	0	#DIV/0!
5	f	0	6	4	1.21425	1.21425	GE1	4	400	3	sim	Lsim	Lateral	2	3		isim	0.0638865	#DIV/0!	1	#DIV/0!
5	f	0	6	5	#DIV/0!		GE1	4	400	3	crus1	Lcrus1	Lateral	2	4		icrus1	0.204864	#DIV/0!	1	#DIV/0!
5	f	0	6	6	#DIV/0!		GE1	4	400	3	crus1	Lcrus1	Lateral	2	4		icrus2	0.0911272	#DIV/0!	1	#DIV/0!
5	f	0	6	7	0.150597	0.150597	GE1	4	400	3	Crus2	LCrus2	Lateral	2	5		ipm	#DIV/0!	#DIV/0!	0	#DIV/0!
5	f	0	6	8	0.40831	0.40831	GE1	4	400	3	PM	LPM	Lateral	2	6		icop	0.219511	#DIV/0!	1	#DIV/0!
5	f	0	6	9	0.160686	0.160686	GE1	4	400	6	sim	isim	IntPosterior	4	7		i4/5	#DIV/0!	#DIV/0!	0	#DIV/0!
5	f	0	6	10	0.089101	0.089101	GE1	4	400	6	Crus2	iCrus2	IntPosterior	4	9		m2	0.0966518	0.0370916	5	0.0165879
5	f	0	6	11	0.361678	0.361678	GE1	4	400	6	PM	iPM	IntPosterior	4	10		m3	0.253566	0.0196984	2	0.0139288
5	f	0	6	12	0.0651997	0.0651997	GE1	4	400	12	2	m2	MedAnterior	5	13		m4/5	0.163608	0.0355522	3	0.0205261
5	f	0	6	13	0.0799147	0.0799147	GE1	4	400	12	2	m2	MedAnterior	5	13		m6	0.13919	0.0140927	2	0.00996503
5	f	0	6	14	0.0617747	0.0617747	GE1	4	400	12	3	m3	MedAnterior	5	14		m7	#DIV/0!	#DIV/0!	0	#DIV/0!
5	f	0	6	15	0.281481	0.281481	GE1	4	400	12	3	m3	MedAnterior	5	14		m8	0.239005	0.127271	2	0.0899941
5	f	0	6	16	0.409548	0.409548	GE1	4	400	12	4/5	m4/5	MedAnterior	5	15		m9	0.144966	0.00824806	2	0.00583226
5	f	0	6	17	0.141222	0.141222	GE1	4	400	12	4/5	m4/5	MedAnterior	5	15		m10	0.119361	0.0248975	2	0.0176052
5	f	0	6	18	0.196532	0.196532	GE1	4	400	12	4/5	m4/5	MedAnterior	5	15
5	f	0	6	19	0.13769	0.13769	GE1	4	400	12	6	m6	MedPosterior	6	16
5	f	0	6	20	0.0636127	0.0636127	GE1	4	400	12	6	m6	MedPosterior	6	16
5	f	0	6	21	0.142849	0.142849	GE1	4	400	12	7	m7	MedPosterior	6	17
5	f	0	6	22	0.0774975	0.0774975	GE1	4	400	12	8	m8	MedPosterior	6	18
5	f	0	6	23	0.184339	0.184339	GE1	4	400	12	8	m8	MedPosterior	6	18
5	f	0	6	24	0.0534322	0.0534322	GE1	4	400	12	9	m9	MedPosterior	6	19
5	f	0	6	25	0.195718	0.195718	GE1	4	400	12	9	m9	MedPosterior	6	19
5	f	0	6	26	0.425809	0.425809	GE1	4	400	12	10	m10	MedPosterior	6	20
5	f	0	6	27	#DIV/0!		GE1	4	400	12	10	m10	MedPosterior	6	20
5	m	1	7	191218b_941	0.374322	0.374322	GE1	4	400	3	Fl	LFl	Vestibular	1	2
5	m	1	7	2	0.225664	0.225664	GE1	4	400	3	pfl	Lpfl	Vestibular	1	1
5	m	1	7	3	0.134285	0.134285	GE1	4	400	3	Crus2	LCrus2	Lateral	2	5
5	m	1	7	4	0.434342	0.434342	GE1	4	400	3	Crus2	LCrus2	Lateral	2	5
5	m	1	7	5	#DIV/0!		GE1	4	400	3	crus2	Lcrus2	Lateral	2	5
5	m	1	7	6	0.147665	0.147665	GE1	4	400	3	Crus1	LCrus1	Lateral	2	4
5	m	1	7	7	0.915821	0.915821	GE1	4	400	3	crus1	Lcrus1	Lateral	2	4
5	m	1	7	8	0.135277	0.135277	GE1	4	400	6	4/5	i4/5	IntAnterior	3	12
5	m	1	7	9	0.137485	0.137485	GE1	4	400	6	Crus1	iCrus1	IntPosterior	4	8
5	m	1	7	10	#DIV/0!		GE1	4	400	6	crus1	icrus1	IntPosterior	4	8		GE1	400 days	N	9									m	N	6			f	N	3
5	m	1	7	11	#DIV/0!		GE1	4	400	6	Crus2	iCrus2	IntPosterior	4	9		By Position ID	average	stdev	n	sem		By major regions	average	stdev	n	sem		average	stdev	n	sem		average	stdev	n	sem
5	m	1	7	12	0.184229	0.184229	GE1	4	400	6	pm	ipm	IntPosterior	4	10		Lpfl	0.245253	0.0763451	4	0.0381726		Vestibular	0.177032	0.107673	11	0.0324648		0.20693	0.111078	7	0.0419836		0.124709	0.0907332	4	0.0453666
5	m	1	7	13	#DIV/0!		GE1	4	400	6				#N/A	#N/A		Lfl	0.138048	0.10739	7	0.0405895		Lateral	0.33089	0.286696	20	0.0641072		0.307293	0.236139	12	0.0681675		0.366286	0.364812	8	0.128981
5	m	1	7	14	0.553039	0.553039	GE1	4	400	12	2	m2	MedAnterior	5	13		Lsim	0.338857	0.387974	7	0.14664		IntAnterior	0.210698	0.114971	5	0.0514168		0.131967	0.0465713	3	0.026888		0.328795	0.0452365	2	0.0319871
5	m	1	7	15	0.141564	0.141564	GE1	4	400	12	2	m2	MedAnterior	5	13		Lcrus1	0.383009	0.292725	7	0.11064		IntPosterior	0.277599	0.218053	20	0.0487581		0.317346	0.231923	15	0.0598824		0.158357	0.117861	5	0.0527091
5	m	1	7	16	0.223668	0.223668	GE1	4	400	12	3	m3	MedAnterior	5	14		Lcrus2	0.253739	0.14058	4	0.0702901		MedAnterior	0.132119	0.0817725	69	0.00984425		0.131626	0.0794097	46	0.0117083		0.133105	0.0881371	23	0.0183779
5	m	1	7	17	0.155236	0.155236	GE1	4	400	12	3	m3	MedAnterior	5	14		Lpm	0.274895	0.188678	2	0.133416		MedPosterior	0.113625	0.0840523	71	0.00997517		0.112677	0.085908	50	0.0121492		0.115882	0.0814721	21	0.0177787
5	m	1	7	18	0.210138	0.210138	GE1	4	400	12	3	m3	MedAnterior	5	14		isim	0.277091	0.181891	5	0.081344
5	m	1	7	19	0.169021	0.169021	GE1	4	400	12	4/5	m4/5	MedAnterior	5	15		icrus1	0.305627	0.318468	3	0.183867
5	m	1	7	20	#DIV/0!		GE1	4	400	12	4/5	m4/5	MedAnterior	5	15		icrus2	0.0962002	0.0100398	2	0.0070992
5	m	1	7	21	0.225477	0.225477	GE1	4	400	12	6	m6	MedPosterior	6	16		ipm	0.220934	0.169013	8	0.0597552
5	m	1	7	22	#DIV/0!		GE1	4	400	12	6	m6	MedPosterior	6	16		icop	0.644888	0.0670578	2	0.047417
5	m	1	7	23	0.0893106	0.0893106	GE1	4	400	12	6	m6	MedPosterior	6	16		i4/5	0.210698	0.114971	5	0.0514168
5	m	1	7	24	#DIV/0!		GE1	4	400	12				#N/A	#N/A		m2	0.122194	0.102296	22	0.0218096
5	m	1	7	25	#DIV/0!		GE1	4	400	12	7	m7	MedPosterior	6	17		m3	0.142532	0.0715109	24	0.0145971
5	m	1	7	26	0.105819	0.105819	GE1	4	400	12	8	m8	MedPosterior	6	18		m4/5	0.130746	0.0715144	23	0.0149118
5	m	1	7	27	#DIV/0!		GE1	4	400	12	8	m8	MedPosterior	6	18		m6	0.114547	0.0604382	19	0.0138655
5	m	1	7	28	0.0940074	0.0940074	GE1	4	400	12	9	m9	MedPosterior	6	19		m7	0.0954234	0.0479775	4	0.0239887
5	m	1	7	29	0.136923	0.136923	GE1	4	400	12	9	m9	MedPosterior	6	19		m8	0.0917082	0.0310459	15	0.00801602
5	m	1	7	30	0.0694248	0.0694248	GE1	4	400	12	9	m9	MedPosterior	6	19		m9	0.0931266	0.0474554	17	0.0115096
5	m	1	7	31	0.482427	0.482427	GE1	4	400	12	10	m10	MedPosterior	6	20		m10	0.159409	0.146771	16	0.0366927
5	m	1	7	32	0.0986279	0.0986279	GE1	4	400	12	10	m10	MedPosterior	6	20
5	f	0	8	191229a_1005	0.0760885	0.0760885	GE1	4	400	3	Fl	LFl	Vestibular	1	2
5	f	0	8	2	0.101599	0.101599	GE1	4	400	3	Fl	LFl	Vestibular	1	2
5	f	0	8	3	0.258623	0.258623	GE1	4	400	3	PFl	LPFl	Vestibular	1	1
5	f	0	8	4	0.129935	0.129935	GE1	4	400	3	sim	Lsim	Lateral	2	3
5	f	0	8	5	0.228557	0.228557	GE1	4	400	3	sim	Lsim	Lateral	2	3
5	f	0	8	6	#DIV/0!		GE1	4	400	3	crus1	Lcrus1	Lateral	2	4
5	f	0	8	7	0.141479	0.141479	GE1	4	400	3	PM	LPM	Lateral	2	6
5	f	0	8	8	0.0979704	0.0979704	GE1	4	400	6	Sim	iSim	IntPosterior	4	7
5	f	0	8	9	0.0823503	0.0823503	GE1	4	400	6	PM	iPM	IntPosterior	4	10
5	f	0	8	10	0.116758	0.116758	GE1	4	400	11	2	m2	MedAnterior	5	13
5	f	0	8	11	0.0987569	0.0987569	GE1	4	400	11	2	m2	MedAnterior	5	13
5	f	0	8	12	0.114751	0.114751	GE1	4	400	11	3	m3	MedAnterior	5	14
5	f	0	8	13	0.0765426	0.0765426	GE1	4	400	11	3	m3	MedAnterior	5	14
5	f	0	8	14	0.101301	0.101301	GE1	4	400	11	3	m3	MedAnterior	5	14
5	f	0	8	15	0.0804183	0.0804183	GE1	4	400	11	4/5	m4/5	MedAnterior	5	15
5	f	0	8	16	0.0699246	0.0699246	GE1	4	400	11	4/5	m4/5	MedAnterior	5	15
5	f	0	8	17	0.13494	0.13494	GE1	4	400	11	4/5	m4/5	MedAnterior	5	15
5	f	0	8	18	0.136828	0.136828	GE1	4	400	11	6	m6	MedPosterior	6	16
5	f	0	8	19	0.076703	0.076703	GE1	4	400	11	6	m6	MedPosterior	6	16
5	f	0	8	20	0.0717066	0.0717066	GE1	4	400	11	6	m6	MedPosterior	6	16
5	f	0	8	21	0.0710842	0.0710842	GE1	4	400	11	8	m8	MedPosterior	6	18
5	f	0	8	22	0.109757	0.109757	GE1	4	400	11	9	m9	MedPosterior	6	19
5	f	0	8	23	0.0576405	0.0576405	GE1	4	400	11	10	m10	MedPosterior	6	20
5	f	0	8	24	0.0860034	0.0860034	GE1	4	400	11	10	m10	MedPosterior	6	20
5	f	0	9	200102a_1002	0.462874	0.462874	GE1	4	400	3	Crus1	LCrus1	Lateral	2	4
5	f	0	9	2	0.360782	0.360782	GE1	4	400	5	4/5	i4/5	IntAnterior	3	12
5	f	0	9	3	0.296808	0.296808	GE1	4	400	5	4/5	i4/5	IntAnterior	3	12
5	f	0	9	4	0.133026	0.133026	GE1	4	400	12	2	m2	MedAnterior	5	13
5	f	0	9	5	0.113627	0.113627	GE1	4	400	12	2	m2	MedAnterior	5	13
5	f	0	9	6	0.117665	0.117665	GE1	4	400	12	3	m3	MedAnterior	5	14
5	f	0	9	7	0.108537	0.108537	GE1	4	400	12	3	m3	MedAnterior	5	14
5	f	0	9	8	0.31665	0.31665	GE1	4	400	12	3	m3	MedAnterior	5	14
5	f	0	9	9	0.0788649	0.0788649	GE1	4	400	12	4/5	m4/5	MedAnterior	5	15
5	f	0	9	10	0.0811551	0.0811551	GE1	4	400	12	4/5	m4/5	MedAnterior	5	15
5	f	0	9	11	0.082817	0.082817	GE1	4	400	12	4/5	m4/5	MedAnterior	5	15
5	f	0	9	12	0.0935047	0.0935047	GE1	4	400	12	6	m6	MedPosterior	6	16
5	f	0	9	13	0.10008	0.10008	GE1	4	400	12	6	m6	MedPosterior	6	16
5	f	0	9	14	0.0488893	0.0488893	GE1	4	400	12	7	m7	MedPosterior	6	17
5	f	0	9	15	0.0922209	0.0922209	GE1	4	400	12	8	m8	MedPosterior	6	18
5	f	0	9	16	0.104268	0.104268	GE1	4	400	12	9	m9	MedPosterior	6	19
5	f	0	9	17	0.103897	0.103897	GE1	4	400	12	10	m10	MedPosterior	6	20
5	m	1	10	200115b_1042	0.233053	0.233053	GE1	4	400	3	sim	Lsim	Lateral	2	3
5	m	1	10	2	0.176018	0.176018	GE1	4	400	3	crus1	Lcrus1	Lateral	2	4
5	m	1	10	3	0.173214	0.173214	GE1	4	400	3	crus1	Lcrus1	Lateral	2	4
5	m	1	10	4	0.149781	0.149781	GE1	4	400	6	PM	iPM	IntPosterior	4	10
5	m	1	10	5	#DIV/0!		GE1	4	400	6	crus2	icrus2	IntPosterior	4	9
5	m	1	10	6	0.10647	0.10647	GE1	4	400	6	crus1	icrus1	IntPosterior	4	8
5	m	1	10	7	0.127573	0.127573	GE1	4	400	6	PM	iPM	IntPosterior	4	10
5	m	1	10	8	0.0835645	0.0835645	GE1	4	400	12	2	m2	MedAnterior	5	13
5	m	1	10	9	0.088351	0.088351	GE1	4	400	12	2	m2	MedAnterior	5	13
5	m	1	10	10	0.139493	0.139493	GE1	4	400	12	3	m3	MedAnterior	5	14
5	m	1	10	11	0.107359	0.107359	GE1	4	400	12	3	m3	MedAnterior	5	14
5	m	1	10	12	#DIV/0!		GE1	4	400	12	4/5	m4/5	MedAnterior	5	15
5	m	1	10	13	0.136485	0.136485	GE1	4	400	12	4/5	m4/5	MedAnterior	5	15
5	m	1	10	14	0.124316	0.124316	GE1	4	400	12	4/5	m4/5	MedAnterior	5	15
5	m	1	10	15	0.12167	0.12167	GE1	4	400	12	6	m6	MedPosterior	6	16
5	m	1	10	16	0.130266	0.130266	GE1	4	400	12	7	m7	MedPosterior	6	17
5	m	1	10	17	0.0765292	0.0765292	GE1	4	400	12	8	m8	MedPosterior	6	18
5	m	1	10	18	0.0659579	0.0659579	GE1	4	400	12	8	m8	MedPosterior	6	18
5	m	1	10	19	0.0612882	0.0612882	GE1	4	400	12	9	m9	MedPosterior	6	19
5	m	1	10	20	0.0366815	0.0366815	GE1	4	400	12	9	m9	MedPosterior	6	19
5	m	1	10	21	0.0506852	0.0506852	GE1	4	400	12	10	m10	MedPosterior	6	20
5	m	1	10	22	0.172802	0.172802	GE1	4	400	12	10	m10	MedPosterior	6	20
																			#NAME?

## Sheet: Animal Masked ID#
	Exp. Date_Animal ear tag #	Genotype	ID#
	190409a_1382	AtmN/N; Aptx-/-	1
	190409b_1385	AtmN/N; Aptx-/-	2
	190411a_1412	AtmN/N; Aptx-/-	3
	190412a_1413	AtmN/N; Aptx-/-	4
	190611b_1727	AtmN/N; Aptx-/-	5
	190612a_1729	AtmN/N; Aptx-/-	6
	190612c_1710	AtmN/N; Aptx-/-	7
	190725b_1574	AtmN/N; Aptx-/-	8
	190812a_1657	AtmN/N; Aptx-/-	9
	190823a_1670	AtmN/N; Aptx-/-	10
	190823b_1671	AtmN/N; Aptx-/-	11
	190826a_1695	AtmN/N; Aptx-/-	12
	190924a_1830	AtmN/N; Aptx-/-	13
	191008_1874	AtmN/N; Aptx-/-	14
	191122b_1711	AtmN/N; Aptx-/-	15
	191216_952	AtmN/N; Aptx-/-	16
	191223_1785	AtmN/N; Aptx-/-	17
	191229b_989	AtmN/N; Aptx-/-	18
	200105a_2226	AtmN/N; Aptx-/-	19
	200129a_2004	AtmN/N; Aptx-/-	20
	200129b_2040	AtmN/N; Aptx-/-	21
	200225_2580	AtmN/N; Aptx-/-	22
	200709_1906	AtmN/N; Aptx-/-	23
	200303b_1276	AtmN/N; Aptx+/-	1
	200305b_1284	AtmN/N; Aptx+/-	2
	191204b_2155	AtmN/N; Aptx+/+	1
	191213a_2408	AtmN/N; Aptx+/+	2
	191213b_2407	AtmN/N; Aptx+/+	3
	200113_1923	AtmN/N; Aptx+/+	4
	200131_2303	AtmN/N; Aptx+/+	5
	200205a_2319	AtmN/N; Aptx+/+	6
	200205b_2321	AtmN/N; Aptx+/+	7
	200220_2118	AtmN/N; Aptx+/+	8
	200227_2573	AtmN/N; Aptx+/+	9
	200228_2577	AtmN/N; Aptx+/+	10
	200302_2151	AtmN/N; Aptx+/+	11
	200303a_1266	AtmN/N; Aptx+/+	12
	200304_1306	AtmN/N; Aptx+/+	13
	200305a_1262	AtmN/N; Aptx+/+	14
	200309_2597	AtmN/N; Aptx+/+	15
	2003010_2178	AtmN/N; Aptx+/+	16
	2003012_2638	AtmN/N; Aptx+/+	17
	200401_2629	AtmN/N; Aptx+/+	18
	200429_2563	AtmN/N; Aptx+/+	19
	200507a_2311	AtmN/N; Aptx+/+	20
	200507b_2314	AtmN/N; Aptx+/+	21
	200528_1658	AtmN/N; Aptx+/+	22
	200713_2697	AtmN/N; Aptx+/+	23
	200714a_1915	AtmN/N; Aptx+/+	24
	200714b_1875	AtmN/N; Aptx+/+	25
	200715_1917	AtmN/N; Aptx+/+	26
	191119_1665	AtmN/Wt; Aptx-/-	1
	191126_861	AtmN/Wt; Aptx-/-	2
	191127_862	AtmN/Wt; Aptx-/-	3
	191209_896	AtmN/Wt; Aptx-/-	4
	191211a_893	AtmN/Wt; Aptx-/-	5
	191211b_892	AtmN/Wt; Aptx-/-	6
	191218b_941	AtmN/Wt; Aptx-/-	7
	191229a_1005	AtmN/Wt; Aptx-/-	8
	200102a_1002	AtmN/Wt; Aptx-/-	9
	200115b_1042	AtmN/Wt; Aptx-/-	10
	190417_1386	AtmWt/Wt; Aptx-/-	1
	190418_1442	AtmWt/Wt; Aptx-/-	2
	190422_1445	AtmWt/Wt; Aptx-/-	3
	190604_1644	AtmWt/Wt; Aptx-/-	4
	190611a_1726	AtmWt/Wt; Aptx-/-	5
	190612b_1760	AtmWt/Wt; Aptx-/-	6
	190619a_1756	AtmWt/Wt; Aptx-/-	7
	190620a_1757	AtmWt/Wt; Aptx-/-	8
	190725a_1569	AtmWt/Wt; Aptx-/-	9
	190726a_1567	AtmWt/Wt; Aptx-/-	10
	190807a_1622	AtmWt/Wt; Aptx-/-	11
	190809a_1638	AtmWt/Wt; Aptx-/-	12
	190819a_1706	AtmWt/Wt; Aptx-/-	13
	190822_1724	AtmWt/Wt; Aptx-/-	14
	190822a_1725	AtmWt/Wt; Aptx-/-	15
	190903_1735	AtmWt/Wt; Aptx-/-	16
	191004a_1449	AtmWt/Wt; Aptx-/-	17
	191004b_1447	AtmWt/Wt; Aptx-/-	18
	191030_1576	AtmWt/Wt; Aptx-/-	19
	191031_1616	AtmWt/Wt; Aptx-/-	20
	191101_1575	AtmWt/Wt; Aptx-/-	21
	191111a_1642	AtmWt/Wt; Aptx-/-	22
	191111b_1645	AtmWt/Wt; Aptx-/-	23
	200102b_1004	AtmWt/Wt; Aptx-/-	24
	200103a_1001	AtmWt/Wt; Aptx-/-	25
	200105b_1003	AtmWt/Wt; Aptx-/-	26
	200109_1024	AtmWt/Wt; Aptx-/-	27
	200114_1104	AtmWt/Wt; Aptx-/-	28
	200115a_1049	AtmWt/Wt; Aptx-/-	29
	200116_1069	AtmWt/Wt; Aptx-/-	30
	190114_1011	AtmWt/Wt; Aptx+/+	1
	190115_1012	AtmWt/Wt; Aptx+/+	2
	190408_1373	AtmWt/Wt; Aptx+/+	3
	190416_1374	AtmWt/Wt; Aptx+/+	4
	190812b_1949	AtmWt/Wt; Aptx+/+	5
	190819b_1709	AtmWt/Wt; Aptx+/+	6
	190920a_1820	AtmWt/Wt; Aptx+/+	7
	190923a_1809	AtmWt/Wt; Aptx+/+	8
	190923b_1818	AtmWt/Wt; Aptx+/+	9
	191112_2117	AtmWt/Wt; Aptx+/+	10
	191114_2091	AtmWt/Wt; Aptx+/+	11
	191115a_2299	AtmWt/Wt; Aptx+/+	12
	191115b_2300	AtmWt/Wt; Aptx+/+	13
	191121a_1693	AtmWt/Wt; Aptx+/+	14
	191122b_1694	AtmWt/Wt; Aptx+/+	15
	191202a_1743	AtmWt/Wt; Aptx+/+	16
	191202b_1741	AtmWt/Wt; Aptx+/+	17
	191204a_2152	AtmWt/Wt; Aptx+/+	18
	191206_2167	AtmWt/Wt; Aptx+/+	19
	191217a_940	AtmWt/Wt; Aptx+/+	20
	191217b_939	AtmWt/Wt; Aptx+/+	21
	191218a_962	AtmWt/Wt; Aptx+/+	22
	191230a_1010	AtmWt/Wt; Aptx+/+	23
	191230b_1009	AtmWt/Wt; Aptx+/+	24
	200103b_969	AtmWt/Wt; Aptx+/+	25
	200107_1018	AtmWt/Wt; Aptx+/+	26
	200127a_2035	AtmWt/Wt; Aptx+/+	27
	200127b_2018	AtmWt/Wt; Aptx+/+	28
	200221_2087	AtmWt/Wt; Aptx+/+	29

## Sheet: all
sex	sex code (1=m)	animal masked ID#	Exp. Date_Animal ID	Average frequency	Age	Genotype	age	Group	slice	folia	Position name	Region name	Gross Region ID	Position ID
f	0	4	9	156.913	1	1	45	GE2	2	pfl	Lpfl	Vestibular	1	1
m	1	7	5	28.3741	2	1	120	GE3	3	pfl	Lpfl	Vestibular	1	1			Position ID			Gross Region ID
m	1	7	6		2	1	120	GE3	3	pfl	Lpfl	Vestibular	1	1			Lpfl	1		Vestibular	1
m	1	9	7	34.405	2	1	120	GE3	3	pfl	Lpfl	Vestibular	1	1			Lfl	2		Lateral	2
f	0	14	2	51.1401	3	1	210	GE4	3	pfl	Lpfl	Vestibular	1	1			Lsim	3		IntAnterior	3
f	0	14	3	52.6203	3	1	210	GE4	3	pfl	Lpfl	Vestibular	1	1			Lcrus1	4		IntPosterior	4
f	0	15	191122b_1694	30.9035	3	1	210	GE4	3	pfl	Lpfl	Vestibular	1	1			Lcrus2	5		MedAnterior	5
f	0	15	2	74.3152	3	1	210	GE4	3	pfl	Lpfl	Vestibular	1	1			Lpm	6		MedPosterior	6
f	0	28	200127b_2018	65.8088	3	1	210	GE4	3	PFl	LPFl	Vestibular	1	1			isim	7
f	0	28	2	8.78667	3	1	210	GE4	3	PFl	LPFl	Vestibular	1	1			icrus1	8		Genotype ID
m	1	29	200221_2087	31.7406	3	1	210	GE4	3		LPFl	Vestibular	1	1			icrus2	9		AtmWt/Wt; Aptx+/+	1
m	1	29		31.3247	3	1	210	GE4	3		lPFl	Vestibular	1	1			ipm	10		AtmN/N; Aptx-/-	2
f	0	23	191230a_1010	62.3627	4	1	400	GE1	3	PFl	LPFl	Vestibular	1	1			icop	11		AtmN/N; Aptx+/+	3
f	0	23		33.6799	4	1	400	GE1	3	PFl	LPFl	Vestibular	1	1			i4/5	12		AtmWt/Wt; Aptx-/-	4
f	0	24	191230b_1009	41.1202	4	1	400	GE1	3	PFl	LPFl	Vestibular	1	1			m2	13		AtmN/Wt; Aptx-/-	5
f	0	26	3	17.9927	4	1	400	GE1	2	PFl	LPFl	Vestibular	1	1			m3	14
m	1	20	2	19.5522	4	1	400	GE1	3	PFl	LPFl	Vestibular	1	1			m4/5	15
m	1	21	191217b_939	23.0195	4	1	400	GE1	3	PFl	LPFl	Vestibular	1	1			m6	16
m	1	21	2	26.0263	4	1	400	GE1	3	PFl	LPFl	Vestibular	1	1			m7	17
m	1	22	3	52.3761	4	1	400	GE1	3	PFl	LPFl	Vestibular	1	1			m8	18
f	0	22	200225_2580	13.7856	1	2	45	GE2	3	PFl	LPFl	Vestibular	1	1			m9	19
f	0	22		16.48	1	2	45	GE2	3	PFl	LPFl	Vestibular	1	1			m10	20
m	1	5	7	17.6309	1	2	45	GE2	2	pfl	Lpfl	Vestibular	1	1
m	1	5	8	71.7681	1	2	45	GE2	2	pfl	Lpfl	Vestibular	1	1
f	0	8	190725b_1574	56.1454	2	2	120	GE3	3	pfl	Lpfl	Vestibular	1	1
f	0	8	2	51.4891	2	2	120	GE3	3	pfl	Lpfl	Vestibular	1	1
f	0	10		17.085	2	2	120	GE3	3	pfl	Lpfl	Vestibular	1	1
m	1	13	9	27.4684	2	2	120	GE3	2	pfl	Lpfl	Vestibular	1	1
m	1	14	6	23.1282	2	2	120	GE3	3	pfl	Lpfl	Vestibular	1	1
m	1	14	7	6.73257	2	2	120	GE3	3	pfl	Lpfl	Vestibular	1	1
m	1	19		1.91477	2	2	120	GE3	3	PFl	LPFl	Vestibular	1	1
m	1	19		4.07863	2	2	120	GE3	3	PFl	LPFl	Vestibular	1	1
m	1	17	3	31.9591	3	2	210	GE4	3	PFl	LPFl	Vestibular	1	1
m	1	20	200129a_2004	30.6412	3	2	210	GE4	3	PFl	LPFl	Vestibular	1	1
m	1	20		55.4673	3	2	210	GE4	3	PFl	LPFl	Vestibular	1	1
f	0	16	191216_952		4	2	400	GE1	3	PFl	LPFl	Vestibular	1	1
m	1	23		21.5281	4	2	400	GE1	2	pfl	Lpfl	Vestibular	1	1
m	1	23		38.3563	4	2	400	GE1	2	pfl	Lpfl	Vestibular	1	1
m	1	23		20.6223	4	2	400	GE1	3	pfl	Lpfl	Vestibular	1	1
m	1	23		43.9022	4	2	400	GE1	3	pfl	Lpfl	Vestibular	1	1
f	0	15	200309_2597	35.5806	1	3	45	GE2	3	pfl	Lpfl	Vestibular	1	1
f	0	15		9.48919	1	3	45	GE2	3	pfl	Lpfl	Vestibular	1	1
f	0	17		14.114	1	3	45	GE2	3	pfl	Lpfl	Vestibular	1	1
f	0	17		16.9306	1	3	45	GE2	3	pfl	Lpfl	Vestibular	1	1
f	0	18	200401_2629	26.2018	1	3	45	GE2	3	pfl	Lpfl	Vestibular	1	1
m	1	2	191213a_2408		1	3	45	GE2	3	PFl	LPFl	Vestibular	1	1
m	1	3	191213b_2407	16.8982	1	3	45	GE2	3	PFl	LPFl	Vestibular	1	1
m	1	3		62.5748	1	3	45	GE2	3	PFl	LPFl	Vestibular	1	1
m	1	9	2	7.41151	1	3	45	GE2	3	PFl	LPFl	Vestibular	1	1
m	1	10	200228_2577	69.2009	1	3	45	GE2	3	PFl	LPFl	Vestibular	1	1
m	1	10	2	73.7795	1	3	45	GE2	3	PFl	LPFl	Vestibular	1	1
f	0	1	191204b_2155	22.3807	2	3	120	GE3	3	pfl	Lpfl	Vestibular	1	1
m	1	5	200131_2303	17.2006	2	3	120	GE3	3	PFl	LPFl	Vestibular	1	1
m	1	5			2	3	120	GE3	3	PFl	LPFl	Vestibular	1	1
m	1	6		14.148	2	3	120	GE3	3	PFl	LPFl	Vestibular	1	1
m	1	7	200205b_2321	60.7057	2	3	120	GE3	3	PFl	LPFl	Vestibular	1	1
f	0	16	2003010_2178	8.49855	3	3	210	GE4	3	pfl	Lpfl	Vestibular	1	1
f	0	16	2	70.616	3	3	210	GE4	3	pfl	Lpfl	Vestibular	1	1
f	0	16	3		3	3	210	GE4	3	pfl	Lpfl	Vestibular	1	1
f	0	21	2	17.6353	3	3	210	GE4	3	pfl	Lpfl	Vestibular	1	1
f	0	21	3		3	3	210	GE4	3	pfl	Lpfl	Vestibular	1	1
m	1	8	200220_2118	28.2083	3	3	210	GE4	3	PFl	LPFl	Vestibular	1	1
m	1	11	200302_2151		3	3	210	GE4	3	pfl	Lpfl	Vestibular	1	1
f	0	13		59.7521	4	3	400	GE1	3	pfl	Lpfl	Vestibular	1	1
f	0	25	200714b_1875	44.1059	4	3	400	GE1	3	pfl	Lpfl	Vestibular	1	1
m	1	12	200303a_1266	7.09621	4	3	400	GE1	3	pfl	Lpfl	Vestibular	1	1
m	1	22	200528_1658	19.1004	4	3	400	GE1	2	pfl	Lpfl	Vestibular	1	1
m	1	22		9.72435	4	3	400	GE1	3	pfl	Lpfl	Vestibular	1	1
m	1	24		70.8331	4	3	400	GE1	2	pfl	Lpfl	Vestibular	1	1
m	1	24		110.874	4	3	400	GE1	2	pfl	Lpfl	Vestibular	1	1
m	1	24		63.4625	4	3	400	GE1	3	pfl	Lpfl	Vestibular	1	1
m	1	26	200715_1917	22.7068	4	3	400	GE1	2	pfl	Lpfl	Vestibular	1	1
m	1	26	3	57.0225	4	3	400	GE1	2	pfl	Lpfl	Vestibular	1	1
f	0	4	190604_1644	77.9454	1	4	45	GE2	3	pfl	Lpfl	Vestibular	1	1
m	1	1	190417_1386	75.0155	1	4	45	GE2	4	pfl	Lpfl	Vestibular	1	1
m	1	1	2	110.224	1	4	45	GE2	4	pfl	Lpfl	Vestibular	1	1
m	1	11	7	22.2253	2	4	120	GE3	2	pfl	Lpfl	Vestibular	1	1
f	0	24	200102b_1004	30.3241	4	4	400	GE1	3	PFl	LPFl	Vestibular	1	1
f	0	25	200103a_1001	17.4538	4	4	400	GE1	3	PFl	LPFl	Vestibular	1	1
f	0	25	2	75.5659	4	4	400	GE1	3	PFl	LPFl	Vestibular	1	1
f	0	26	200105b_1003	41.1496	4	4	400	GE1	3	PFl	LPFl	Vestibular	1	1
f	0	27	200109_1024	22.7324	4	4	400	GE1	3	PFl	LPFl	Vestibular	1	1
m	1	28	3		4	4	400	GE1	3	PFl	LPFl		#N/A	1
m	1	30	2	28.0254	4	4	400	GE1	3	PFl	LPFl	Vestibular	1	1
f	0	8	3	13.0315	4	5	400	GE1	3	PFl	LPFl	Vestibular	1	1
m	1	2	3	156.665	4	5	400	GE1	3	pfl	Lpfl	Vestibular	1	1
m	1	3	191127_862	39.5081	4	5	400	GE1	2	pfl	Lpfl	Vestibular	1	1
m	1	7	2	22.3931	4	5	400	GE1	3	pfl	Lpfl	Vestibular	1	1
f	0	18	191204a_2152	119.292	2	1	120	GE3	3	Fl	LFl	Vestibular	1	2
f	0	19	191206_2167	26.7172	2	1	120	GE3	3	Fl	LFl	Vestibular	1	2
m	1	8	4	38.2914	2	1	120	GE3	3	fl	Lfl	Vestibular	1	2
m	1	9	8	25.6864	2	1	120	GE3	3	fl	Lfl	Vestibular	1	2
m	1	9	9	93.8477	2	1	120	GE3	3	fl	Lfl	Vestibular	1	2
f	0	28	3	60.6044	3	1	210	GE4	3	Fl	LFl	Vestibular	1	2
m	1	16	191202a_1743	56.8299	3	1	210	GE4	2	fl	Lfl	Vestibular	1	2
m	1	29		55.5743	3	1	210	GE4	3		lFl	Vestibular	1	2
f	0	25	200103b_969	116.35	4	1	400	GE1	3	Fl	LFl	Vestibular	1	2
f	0	25	2	131.122	4	1	400	GE1	3	Fl	LFl	Vestibular	1	2
f	0	26	200107_1018	57.5223	4	1	400	GE1	2	Fl	LFl	Vestibular	1	2
f	0	26	2	105.412	4	1	400	GE1	2	Fl	LFl	Vestibular	1	2
m	1	20	191217a_940	85.6056	4	1	400	GE1	3	Fl	LFl	Vestibular	1	2
m	1	21	3	10.8709	4	1	400	GE1	3	Fl	LFl	Vestibular	1	2
m	1	22	191218a_962	106.403	4	1	400	GE1	3	Fl	LFl	Vestibular	1	2
m	1	22	2		4	1	400	GE1	3	Fl	LFl	Vestibular	1	2
m	1	14	8	48.3449	2	2	120	GE3	3	fl	Lfl	Vestibular	1	2
m	1	14	9	58.162	2	2	120	GE3	3	fl	Lfl	Vestibular	1	2
m	1	19	200105a_2226	32.4529	2	2	120	GE3	3	Fl	LFl	Vestibular	1	2
m	1	17	191223_1785	51.9358	3	2	210	GE4	3	Fl	LFl	Vestibular	1	2
m	1	17	2	19.0154	3	2	210	GE4	3	Fl	LFl	Vestibular	1	2
m	1	20		10.2456	3	2	210	GE4	3	Fl	LFl	Vestibular	1	2
m	1	20		9.31753	3	2	210	GE4	3	Fl	LFl	Vestibular	1	2
m	1	21	200129b_2040	18.5146	3	2	210	GE4	3	Fl	LFl	Vestibular	1	2
m	1	21		44.7434	3	2	210	GE4	3	Fl	LFl	Vestibular	1	2
f	0	16		15.088	4	2	400	GE1	3	Fl	LFl	Vestibular	1	2
m	1	18	191229b_989	35.1897	4	2	400	GE1	3	Fl	LFl	Vestibular	1	2
f	0	17	2003012_2638	85.6664	1	3	45	GE2	3	fl	Lfl	Vestibular	1	2
f	0	17		64.1995	1	3	45	GE2	3	fl	Lfl	Vestibular	1	2
m	1	5		115.519	2	3	120	GE3	3	Fl	LFl	Vestibular	1	2
m	1	6	200205a_2319		2	3	120	GE3	3	Fl	LFl	Vestibular	1	2
m	1	19		21.6511	2	3	120	GE3	3	fl	Lfl	Vestibular	1	2
f	0	21	200507b_2314	4.73596	3	3	210	GE4	3	fl	Lfl	Vestibular	1	2
m	1	4	200113_1923	32.4618	3	3	210	GE4	2	Fl	LFl	Vestibular	1	2
m	1	4		81.7897	3	3	210	GE4	2	Fl	LFl	Vestibular	1	2
m	1	4		34.5585	3	3	210	GE4	2	Fl	LFl	Vestibular	1	2
m	1	11	2	57.4812	3	3	210	GE4	3	fl	Lfl	Vestibular	1	2
f	0	13	200304_1306	13.8456	4	3	400	GE1	3	fl	Lfl	Vestibular	1	2
f	0	13		35.5157	4	3	400	GE1	3	fl	Lfl	Vestibular	1	2
f	0	14	200305a_1262	86.7939	4	3	400	GE1	3	fl	Lfl	Vestibular	1	2
f	0	25	2	77.9292	4	3	400	GE1	3	fl	Lfl	Vestibular	1	2
m	1	12		54.0747	4	3	400	GE1	3	fl	Lfl	Vestibular	1	2
m	1	12		46.0633	4	3	400	GE1	3	fl	Lfl	Vestibular	1	2
m	1	22		24.7458	4	3	400	GE1	2	fl	Lfl	Vestibular	1	2
m	1	22		56.8059	4	3	400	GE1	3	fl	Lfl	Vestibular	1	2
m	1	22		32.5139	4	3	400	GE1	3	fl	Lfl	Vestibular	1	2
m	1	24	200714a_1915		4	3	400	GE1	2	fl	Lfl	Vestibular	1	2
m	1	24		91.7622	4	3	400	GE1	2	fl	Lfl	Vestibular	1	2
m	1	24		44.5396	4	3	400	GE1	3	fl	Lfl	Vestibular	1	2
m	1	26	2	103.643	4	3	400	GE1	2	fl	Lfl	Vestibular	1	2
m	1	26	4	15.0304	4	3	400	GE1	2	fl	Lfl	Vestibular	1	2
f	0	20	5	66.1968	3	4	210	GE4	2	fl	Lfl	Vestibular	1	2
f	0	26	2	92.3575	4	4	400	GE1	3	Fl	LFl	Vestibular	1	2
m	1	28	200114_1104	37.2847	4	4	400	GE1	3	Fl	LFl	Vestibular	1	2
m	1	28	2	15.7871	4	4	400	GE1	3	Fl	LFl	Vestibular	1	2
m	1	29	200115a_1049	35.9572	4	4	400	GE1	2	Fl	LFl	Vestibular	1	2
m	1	30	200116_1069	28.0254	4	4	400	GE1	3	Fl	LFl	Vestibular	1	2
f	0	6	191211b_892	81.7662	4	5	400	GE1	3	Fl	LFl	Vestibular	1	2
f	0	6	2		4	5	400	GE1	3	Fl	LFl	Vestibular	1	2
f	0	8	191229a_1005	63.109	4	5	400	GE1	3	Fl	LFl	Vestibular	1	2
f	0	8	2	72.4996	4	5	400	GE1	3	Fl	LFl	Vestibular	1	2
m	1	2	191126_861	22.5349	4	5	400	GE1	3	fl	Lfl	Vestibular	1	2
m	1	2	2	22.6332	4	5	400	GE1	3	fl	Lfl	Vestibular	1	2
m	1	4	191209_896	70.7465	4	5	400	GE1	3	Fl	LFl	Vestibular	1	2
m	1	7	191218b_941	15.4379	4	5	400	GE1	3	Fl	LFl	Vestibular	1	2
f	0	3	190408_1373	4.92272	1	1	45	GE2	3	sim	Lsim	Lateral	2	3
f	0	3	2	61.7198	1	1	45	GE2	3	sim	Lsim	Lateral	2	3
f	0	4	8	21.9762	1	1	45	GE2	2	sim	Lsim	Lateral	2	3
f	0	13	191115b_2300	15.993	1	1	45	GE2	3	sim	Lsim	Lateral	2	3
m	1	2	6	137.485	1	1	45	GE2	4	sim	Lsim	Lateral	2	3
f	0	10	191112_2117	25.4932	2	1	120	GE3	3	sim	Lsim	Lateral	2	3
f	0	10	2	16.6412	2	1	120	GE3	3	sim	Lsim	Lateral	2	3
f	0	19	8	126.015	2	1	120	GE3	3	Sim	LSim	Lateral	2	3
f	0	19	9	42.7682	2	1	120	GE3	3	Sim	LSim	Lateral	2	3
m	1	6	3	47.0183	2	1	120	GE3	2	sim	Lsim	Lateral	2	3
m	1	9	190923b_1818	62.5491	2	1	120	GE3	3	sim	Lsim	Lateral	2	3
m	1	9	2		2	1	120	GE3	3	sim	Lsim	Lateral	2	3
f	0	15	4		3	1	210	GE4	3	sim	Lsim	Lateral	2	3
f	0	28	4	141.475	3	1	210	GE4	3	sim	Lsim	Lateral	2	3
m	1	17	191202b_1741	104.846	3	1	210	GE4	2	sim	Lsim	Lateral	2	3
m	1	17	2	21.6577	3	1	210	GE4	2	sim	Lsim	Lateral	2	3
m	1	29			3	1	210	GE4	3		lSim	Lateral	2	3
f	0	24	7	27.2466	4	1	400	GE1	3	Sim	LSim	Lateral	2	3
f	0	24	8	129.011	4	1	400	GE1	3	Sim	LSim	Lateral	2	3
f	0	25	3	5.80492	4	1	400	GE1	3	Sim	LSim	Lateral	2	3
m	1	20	3	28.7165	4	1	400	GE1	3	Sim	LSim	Lateral	2	3
m	1	20	4	109.098	4	1	400	GE1	3	Sim	LSim	Lateral	2	3
m	1	22	4	181.736	4	1	400	GE1	3	sim	Lsim	Lateral	2	3
m	1	22	5	32.8491	4	1	400	GE1	3	sim	Lsim	Lateral	2	3
f	0	1	190409a_1382	34.9878	1	2	45	GE2	3	sim	Lsim	Lateral	2	3
f	0	2	3	82.8459	1	2	45	GE2	3	sim	Lsim	Lateral	2	3
f	0	2	4	58.2834	1	2	45	GE2	3	sim	Lsim	Lateral	2	3
f	0	7	190612c_1710	66.3018	1	2	45	GE2	3	sim	Lsim	Lateral	2	3
f	0	7	2	129.268	1	2	45	GE2	3	sim	Lsim	Lateral	2	3
m	1	4	8	77.024	1	2	45	GE2	2	sim	Lsim	Lateral	2	3
m	1	5	190611b_1727	23.4351	1	2	45	GE2	2	sim	Lsim	Lateral	2	3
f	0	12	190826a_1695	61.0936	2	2	120	GE3	3	sim	Lsim	Lateral	2	3
m	1	13	190924a_1830	107.827	2	2	120	GE3	2	sim	Lsim	Lateral	2	3
m	1	13	2	46.2438	2	2	120	GE3	2	sim	Lsim	Lateral	2	3
m	1	13	3	41.4078	2	2	120	GE3	2	sim	Lsim	Lateral	2	3
m	1	13	4	39.2702	2	2	120	GE3	2	sim	Lsim	Lateral	2	3
m	1	14	5	61.4576	2	2	120	GE3	3	sim	Lsim	Lateral	2	3
m	1	17	4	56.5182	3	2	210	GE4	3	Sim	LSim	Lateral	2	3
m	1	17	5	33.5249	3	2	210	GE4	3	Sim	LSim	Lateral	2	3
m	1	20		34.6261	3	2	210	GE4	3	sim	Lsim	Lateral	2	3
m	1	20		5.80686	3	2	210	GE4	3	sim	Lsim	Lateral	2	3
m	1	21		9.4436	3	2	210	GE4	3	Sim	LSim	Lateral	2	3
f	0	15			1	3	45	GE2	3	sim	Lsim	Lateral	2	3
f	0	17		100.275	1	3	45	GE2	3	sim	Lsim	Lateral	2	3
f	0	17		30.0457	1	3	45	GE2	3	sim	Lsim	Lateral	2	3
f	0	18	6	27.532	1	3	45	GE2	3	sim	Lsim	Lateral	2	3
m	1	10	6		1	3	45	GE2	3	sim	Lsim	Lateral	2	3
m	1	5		55.1946	2	3	120	GE3	3	sim	Lsim	Lateral	2	3
m	1	7		29.092	2	3	120	GE3	3	sim	Lsim	Lateral	2	3
m	1	23	200713_2697	72.327	2	3	120	GE3	3	sim	Lsim	Lateral	2	3
m	1	23		115.046	2	3	120	GE3	3	sim	Lsim	Lateral	2	3
f	0	16	7	18.3386	3	3	210	GE4	3	sim	Lsim	Lateral	2	3
f	0	20	200507a_2311	128.31	3	3	210	GE4	3	sim	Lsim	Lateral	2	3
m	1	4		147.864	3	3	210	GE4	3	Sim	LSim	Lateral	2	3
m	1	4		43.7584	3	3	210	GE4	3	sim	Lsim	Lateral	2	3
m	1	8		73.4378	3	3	210	GE4	3	sim	Lsim	Lateral	2	3
m	1	22		11.9359	4	3	400	GE1	3	sim	Lsim	Lateral	2	3
m	1	26	5	48.4485	4	3	400	GE1	2	sim	Lsim	Lateral	2	3
f	0	2	190418_1442	64.4938	1	4	45	GE2	3	sim	Lsim	Lateral	2	3
f	0	2	2	75.3448	1	4	45	GE2	3	sim	Lsim	Lateral	2	3
f	0	2	3	120.79	1	4	45	GE2	3	sim	Lsim	Lateral	2	3
f	0	2	4	12.9904	1	4	45	GE2	3	sim	Lsim	Lateral	2	3
f	0	4	5	29.1071	1	4	45	GE2	3	sim	Lsim	Lateral	2	3
f	0	5	6		1	4	45	GE2	3	sim	Lsim		#N/A	3
f	0	6	5	81.4448	1	4	45	GE2	3	sim	Lsim	Lateral	2	3
m	1	1	9		1	4	45	GE2	4	sim	Lsim		#N/A	3
m	1	7	4	68.7976	1	4	45	GE2	3	sim	Lsim	Lateral	2	3
m	1	8	190620a_1757	159.832	1	4	45	GE2	3	sim	Lsim	Lateral	2	3
m	1	8	2		1	4	45	GE2	3	sim	Lsim		#N/A	3
f	0	10	190726a_1567	39.4324	2	4	120	GE3	3	sim	Lsim	Lateral	2	3
f	0	10	2		2	4	120	GE3	3	sim	Lsim		#N/A	3
f	0	14	190822_1724	43.9557	2	4	120	GE3	3	sim	Lsim	Lateral	2	3
f	0	14	1	60.517	2	4	120	GE3	3	sim	Lsim	Lateral	2	3
m	1	11	190807a_1622	35.685	2	4	120	GE3	2	sim	Lsim	Lateral	2	3
m	1	16	7		2	4	120	GE3	3	sim	Lsim		#N/A	3
m	1	16	8	44.7149	2	4	120	GE3	3	sim	Lsim	Lateral	2	3
f	0	19	191030_1576	9.93688	3	4	210	GE4	3	sim	Lsim	Lateral	2	3
f	0	19		111.843	3	4	210	GE4	3	sim	Lsim	Lateral	2	3
m	1	17	191004a_1449	73.8418	3	4	210	GE4	3	sim	Lsim	Lateral	2	3
m	1	17	2	93.0851	3	4	210	GE4	3	sim	Lsim	Lateral	2	3
m	1	17	3	32.0745	3	4	210	GE4	3	sim	Lsim	Lateral	2	3
f	0	24	2	117.937	4	4	400	GE1	3	Sim	LSim	Lateral	2	3
f	0	27	5		4	4	400	GE1	3	Sim	LSim		#N/A	3
m	1	30	5	155.505	4	4	400	GE1	3	sim	Lsim	Lateral	2	3
m	1	30	6	107.618	4	4	400	GE1	3	sim	Lsim	Lateral	2	3
f	0	6	3	58.2	4	5	400	GE1	3	sim	Lsim	Lateral	2	3
f	0	6	4	6.13429	4	5	400	GE1	3	sim	Lsim	Lateral	2	3
f	0	8	4	134.518	4	5	400	GE1	3	sim	Lsim	Lateral	2	3
f	0	8	5	33.934	4	5	400	GE1	3	sim	Lsim	Lateral	2	3
m	1	4	4	27.8758	4	5	400	GE1	3	sim	Lsim	Lateral	2	3
m	1	5	191211a_893	85.7721	4	5	400	GE1	3	sim	Lsim	Lateral	2	3
m	1	10	200115b_1042	19.3392	4	5	400	GE1	3	sim	Lsim	Lateral	2	3
f	0	3	3	29.6772	1	1	45	GE2	3	crus1	Lcrus1	Lateral	2	4
f	0	4	5		1	1	45	GE2	2	crus1	Lcrus1	Lateral	2	4
f	0	4	6	70.5702	1	1	45	GE2	2	crus1	Lcrus1	Lateral	2	4
f	0	4	7	105.444	1	1	45	GE2	2	crus1	Lcrus1	Lateral	2	4
f	0	12	191115a_2299	173.974	1	1	45	GE2	3	crus1	Lcrus1	Lateral	2	4
f	0	13	2	53.1947	1	1	45	GE2	3	crus1	Lcrus1	Lateral	2	4
f	0	13	3		1	1	45	GE2	3	crus1	Lcrus1	Lateral	2	4
m	1	1	7	20.7807	1	1	45	GE2	3	crus1	Lcrus1	Lateral	2	4
m	1	2	3	5.03059	1	1	45	GE2	4	crus1	Lcrus1	Lateral	2	4
m	1	2	4	68.4195	1	1	45	GE2	4	crus1	Lcrus1	Lateral	2	4
m	1	2	5	29.3667	1	1	45	GE2	4	crus1	Lcrus1	Lateral	2	4
m	1	5	5	42.301	1	1	45	GE2	3	crus1	Lcrus1	Lateral	2	4
f	0	10	3	141.053	2	1	120	GE3	3	crus1	Lcrus1	Lateral	2	4
f	0	11	191114_2091	108.426	2	1	120	GE3	3	crus1	Lcrus1	Lateral	2	4
f	0	19	6	66.689	2	1	120	GE3	3	Crus1	LCrus1	Lateral	2	4
f	0	19	7	79.0555	2	1	120	GE3	3	Crus1	LCrus1	Lateral	2	4
m	1	6	2	17.5745	2	1	120	GE3	2	crus1	Lcrus1	Lateral	2	4
m	1	7	3	39.1135	2	1	120	GE3	3	crus1	Lcrus1	Lateral	2	4
m	1	7	4	43.4674	2	1	120	GE3	3	crus1	Lcrus1	Lateral	2	4
m	1	8	190923a_1809		2	1	120	GE3	3	crus1	Lcrus1	Lateral	2	4
m	1	8	2		2	1	120	GE3	3	crus1	Lcrus1	Lateral	2	4
m	1	9	3	70.734	2	1	120	GE3	3	crus1	Lcrus1	Lateral	2	4
f	0	14	5	111.37	3	1	210	GE4	3	crus1	Lcrus1	Lateral	2	4
f	0	15	5	13.259	3	1	210	GE4	3	crus1	Lcrus1	Lateral	2	4
f	0	27	200127a_2035	31.904	3	1	210	GE4	3	crus1	Lcrus1	Lateral	2	4
f	0	28	5	56.1465	3	1	210	GE4	3	crus1	Lcrus1	Lateral	2	4
m	1	17	3	28.0359	3	1	210	GE4	2	crus1	Lcrus1	Lateral	2	4
m	1	17	4	65.4818	3	1	210	GE4	2	crus1	Lcrus1	Lateral	2	4
m	1	29		54.1941	3	1	210	GE4	3	crus1	lCrus1	Lateral	2	4
f	0	23		47.4078	4	1	400	GE1	3	Crus1	LCrus1	Lateral	2	4
f	0	24	5		4	1	400	GE1	3	Crus1	LCrus1	Lateral	2	4
f	0	24	6	113.63	4	1	400	GE1	3	Crus1	LCrus1	Lateral	2	4
f	0	25	4	119.763	4	1	400	GE1	3	Crus1	LCrus1	Lateral	2	4
m	1	20	5	16.2105	4	1	400	GE1	3	Crus1	LCrus1	Lateral	2	4
m	1	21	4	119.131	4	1	400	GE1	3	Crus1	LCrus1	Lateral	2	4
m	1	21	5		4	1	400	GE1	3	Crus1	LCrus1	Lateral	2	4
m	1	22	6	68.3094	4	1	400	GE1	3	crus1	Lcrus1	Lateral	2	4
m	1	22	7	22.4211	4	1	400	GE1	3	crus1	Lcrus1	Lateral	2	4
f	0	2	190409b_1385	48.6082	1	2	45	GE2	3	crus1	Lcrus1	Lateral	2	4
f	0	2	2	47.3426	1	2	45	GE2	3	crus1	Lcrus1	Lateral	2	4
f	0	7	4	12.033	1	2	45	GE2	3	crus1	Lcrus1	Lateral	2	4
f	0	22		29.8821	1	2	45	GE2	3	Crus1	LCrus1	Lateral	2	4
f	0	22		47.1882	1	2	45	GE2	3	Crus1	LCrus1	Lateral	2	4
m	1	3	4	11.2903	1	2	45	GE2	2	crus1	Lcrus1	Lateral	2	4
m	1	3	5	41.3468	1	2	45	GE2	2	crus1	Lcrus1	Lateral	2	4
m	1	3	6	39.0843	1	2	45	GE2	2	crus1	Lcrus1	Lateral	2	4
m	1	4	6	75.4923	1	2	45	GE2	2	crus1	Lcrus1	Lateral	2	4
m	1	4	7	12.281	1	2	45	GE2	2	crus1	Lcrus1	Lateral	2	4
m	1	5	2	44.6234	1	2	45	GE2	2	crus1	Lcrus1	Lateral	2	4
m	1	5	3	24.0202	1	2	45	GE2	2	crus1	Lcrus1	Lateral	2	4
m	1	5	4	138.385	1	2	45	GE2	2	crus1	Lcrus1	Lateral	2	4
m	1	6	190612a_1729	52.8432	1	2	45	GE2	3	crus1	Lcrus1	Lateral	2	4
f	0	8	3	20.15	2	2	120	GE3	3	crus1	Lcrus1	Lateral	2	4
f	0	10	190823a_1670	24.4024	2	2	120	GE3	3	crus1	Lcrus1	Lateral	2	4
f	0	12	2	31.4945	2	2	120	GE3	3	crus1	Lcrus1	Lateral	2	4
f	0	12	3	30.623	2	2	120	GE3	3	crus1	Lcrus1	Lateral	2	4
m	1	9	190812a_1657	25.242	2	2	120	GE3	2	crus1	Lcrus1	Lateral	2	4
m	1	13	5	28.3044	2	2	120	GE3	2	crus1	Lcrus1	Lateral	2	4
m	1	14	4	41.8718	2	2	120	GE3	3	crus1	Lcrus1	Lateral	2	4
m	1	19		21.1551	2	2	120	GE3	3	Crus1	LCrus1	Lateral	2	4
m	1	17	6	28.458	3	2	210	GE4	3	Crus1	LCrus1	Lateral	2	4
m	1	17	7	24.8843	3	2	210	GE4	3	Crus1	LCrus1	Lateral	2	4
m	1	20		44.9935	3	2	210	GE4	3	crus1	Lcrus1	Lateral	2	4
m	1	21		79.2132	3	2	210	GE4	3	crus1	Lcrus1	Lateral	2	4
f	0	16		8.75654	4	2	400	GE1	3	Crus1	LCrus1	Lateral	2	4
m	1	18	2	53.7558	4	2	400	GE1	3	crus1	Lcrus1	Lateral	2	4
m	1	18	3	38.8734	4	2	400	GE1	3	crus1	Lcrus1	Lateral	2	4
m	1	23		60.227	4	2	400	GE1	3	crus1	Lcrus1	Lateral	2	4
m	1	23		2.94602	4	2	400	GE1	3	crus1	Lcrus1	Lateral	2	4
f	0	15		87.0726	1	3	45	GE2	3	crus1	Lcrus1	Lateral	2	4
f	0	17		10.4547	1	3	45	GE2	3	crus1	Lcrus1	Lateral	2	4
f	0	17			1	3	45	GE2	3	crus1	Lcrus1	Lateral	2	4
f	0	18	5	63.9441	1	3	45	GE2	3	crus1	Lcrus1	Lateral	2	4
m	1	3		57.6156	1	3	45	GE2	3	crus1	Lcrus1	Lateral	2	4
m	1	3		74.3085	1	3	45	GE2	3	crus1	Lcrus1	Lateral	2	4
m	1	9	200227_2573	56.0466	1	3	45	GE2	3	Crus1	LCrus1	Lateral	2	4
m	1	10	5	26.9511	1	3	45	GE2	3	Crus1	LCrus1	Lateral	2	4
f	0	1	3		2	3	120	GE3	3	Crus1	LCrus1	Lateral	2	4
f	0	1	4	95.501	2	3	120	GE3	3	Crus1	LCrus1	Lateral	2	4
m	1	5		4.92941	2	3	120	GE3	3	crus1	Lcrus1	Lateral	2	4
m	1	6		55.0108	2	3	120	GE3	3	crus1	Lcrus1	Lateral	2	4
m	1	6		2.62807	2	3	120	GE3	3	crus1	Lcrus1	Lateral	2	4
m	1	19	200429_2563	55.0021	2	3	120	GE3	3	crus1	Lcrus1	Lateral	2	4
m	1	23			2	3	120	GE3	3	crus1	Lcrus1	Lateral	2	4
f	0	16	6	27.0783	3	3	210	GE4	3	crus1	Lcrus1	Lateral	2	4
f	0	21	6	77.248	3	3	210	GE4	3	crus1	Lcrus1	Lateral	2	4
m	1	4			3	3	210	GE4	3	crus1	Lcrus1	Lateral	2	4
f	0	13		49.2423	4	3	400	GE1	3	crus1	Lcrus1	Lateral	2	4
f	0	13		35.9252	4	3	400	GE1	3	crus1	Lcrus1	Lateral	2	4
f	0	14		32.5634	4	3	400	GE1	3	crus1	Lcrus1	Lateral	2	4
f	0	25	3	69.2981	4	3	400	GE1	3	crus1	Lcrus1	Lateral	2	4
f	0	25	4	66.9468	4	3	400	GE1	3	crus1	Lcrus1	Lateral	2	4
m	1	12		32.1353	4	3	400	GE1	3	crus1	Lcrus1	Lateral	2	4
m	1	22		121.834	4	3	400	GE1	3	crus1	Lcrus1	Lateral	2	4
m	1	22		69.507	4	3	400	GE1	3	crus1	Lcrus1	Lateral	2	4
m	1	24		54.5288	4	3	400	GE1	3	crus1	Lcrus1	Lateral	2	4
m	1	26	6	43.5043	4	3	400	GE1	2	crus1	Lcrus1	Lateral	2	4
m	1	26	7	64.8656	4	3	400	GE1	2	crus1	Lcrus1	Lateral	2	4
f	0	2	5	196.372	1	4	45	GE2	3	crus1	Lcrus1	Lateral	2	4
f	0	2	6	22.5236	1	4	45	GE2	3	crus1	Lcrus1	Lateral	2	4
f	0	2	7		1	4	45	GE2	3	crus1	Lcrus1		#N/A	4
f	0	2	8	11.1587	1	4	45	GE2	3	crus1	Lcrus1	Lateral	2	4
f	0	2	9		1	4	45	GE2	3	crus1	Lcrus1		#N/A	4
f	0	4	4	51.787	1	4	45	GE2	3	crus1	Lcrus1	Lateral	2	4
f	0	5	5	37.9885	1	4	45	GE2	3	crus1	Lcrus1	Lateral	2	4
f	0	6	4	45.6368	1	4	45	GE2	3	crus1	Lcrus1	Lateral	2	4
m	1	1	8	76.3546	1	4	45	GE2	4	crus1	Lcrus1	Lateral	2	4
m	1	3	4	94.9223	1	4	45	GE2	3	crus1	Lcrus1	Lateral	2	4
m	1	3	5	31.1142	1	4	45	GE2	3	crus1	Lcrus1	Lateral	2	4
m	1	7	3	31.5277	1	4	45	GE2	3	crus1	Lcrus1	Lateral	2	4
m	1	8	3	14.3771	1	4	45	GE2	3	crus1	Lcrus1	Lateral	2	4
m	1	8	4	55.297	1	4	45	GE2	3	crus1	Lcrus1	Lateral	2	4
f	0	10	3	102.039	2	4	120	GE3	3	crus1	Lcrus1	Lateral	2	4
f	0	10	4	84.3288	2	4	120	GE3	3	crus1	Lcrus1	Lateral	2	4
f	0	14	2	19.9639	2	4	120	GE3	3	crus1	Lcrus1	Lateral	2	4
f	0	15	190822a_1725	30.5312	2	4	120	GE3	3	crus1	Lcrus1	Lateral	2	4
m	1	11	2		2	4	120	GE3	2	crus1	Lcrus1		#N/A	4
m	1	11	3	111.373	2	4	120	GE3	2	crus1	Lcrus1	Lateral	2	4
m	1	12	190809a_1638	44.6036	2	4	120	GE3	2	crus1	Lcrus1	Lateral	2	4
m	1	12	2	19.2633	2	4	120	GE3	2	crus1	Lcrus1	Lateral	2	4
m	1	13	5		2	4	120	GE3	3	crus1	Lcrus1		#N/A	4
m	1	13	6		2	4	120	GE3	3	crus1	Lcrus1		#N/A	4
m	1	16	5		2	4	120	GE3	3	crus1	Lcrus1		#N/A	4
m	1	16	6	11.4502	2	4	120	GE3	3	crus1	Lcrus1	Lateral	2	4
m	1	17	4	215.56	3	4	210	GE4	3	crus1	Lcrus1	Lateral	2	4
m	1	17	5	39.7027	3	4	210	GE4	3	crus1	Lcrus1	Lateral	2	4
m	1	22	191111a_1642	44.2391	3	4	210	GE4	3	crus1	Lcrus1	Lateral	2	4
m	1	22	2	32.0237	3	4	210	GE4	3	crus1	Lcrus1	Lateral	2	4
f	0	25	4	30.8428	4	4	400	GE1	3	Crus1	LCrus1	Lateral	2	4
f	0	26	4	38.7692	4	4	400	GE1	3	crus1	Lcrus1	Lateral	2	4
f	0	27	4	30.7565	4	4	400	GE1	3	crus1	Lcrus1	Lateral	2	4
m	1	28	4	72.7196	4	4	400	GE1	3	crus1	Lcrus1	Lateral	2	4
m	1	29	2	75.032	4	4	400	GE1	3	crus1	Lcrus1	Lateral	2	4
m	1	1	191119_1665	9.19015	3	5	210	GE4	3	crus1	Lcrus1	Lateral	2	4
f	0	6	5		4	5	400	GE1	3	crus1	Lcrus1	Lateral	2	4
f	0	6	6		4	5	400	GE1	3	crus1	Lcrus1	Lateral	2	4
f	0	8	6		4	5	400	GE1	3	crus1	Lcrus1	Lateral	2	4
f	0	9	200102a_1002	7.03289	4	5	400	GE1	3	Crus1	LCrus1	Lateral	2	4
m	1	3	2		4	5	400	GE1	2	crus1	Lcrus1	Lateral	2	4
m	1	4	3	3.62735	4	5	400	GE1	3	crus1	Lcrus1	Lateral	2	4
m	1	5	2		4	5	400	GE1	3	Crus1	LCrus1	Lateral	2	4
m	1	5	3	102.902	4	5	400	GE1	3	Crus1	LCrus1	Lateral	2	4
m	1	7	6	171.792	4	5	400	GE1	3	Crus1	LCrus1	Lateral	2	4
m	1	7	7	85.1991	4	5	400	GE1	3	crus1	Lcrus1	Lateral	2	4
m	1	10	2	120.911	4	5	400	GE1	3	crus1	Lcrus1	Lateral	2	4
m	1	10	3	15.5713	4	5	400	GE1	3	crus1	Lcrus1	Lateral	2	4
f	0	3	4	55.561	1	1	45	GE2	3	crus2	Lcrus2	Lateral	2	5
f	0	4	3	119.624	1	1	45	GE2	2	crus2	Lcrus2	Lateral	2	5
f	0	4	4		1	1	45	GE2	2	crus2	Lcrus2	Lateral	2	5
f	0	12	2		1	1	45	GE2	3	crus2	Lcrus2	Lateral	2	5
f	0	12	3	13.6879	1	1	45	GE2	3	crus2	Lcrus2	Lateral	2	5
f	0	13	4	96.7454	1	1	45	GE2	3	crus2	Lcrus2	Lateral	2	5
f	0	13	5		1	1	45	GE2	3	crus2	Lcrus2	Lateral	2	5
m	1	1	4	40.0355	1	1	45	GE2	3	crus2	Lcrus2	Lateral	2	5
m	1	1	5	132.153	1	1	45	GE2	3	crus2	Lcrus2	Lateral	2	5
m	1	1	6	118.949	1	1	45	GE2	3	crus2	Lcrus2	Lateral	2	5
m	1	2	2	66.3637	1	1	45	GE2	4	crus2	Lcrus2	Lateral	2	5
m	1	5	3	25.2463	1	1	45	GE2	3	crus2	Lcrus2	Lateral	2	5
m	1	5	4	92.0211	1	1	45	GE2	3	crus2	Lcrus2	Lateral	2	5
f	0	11	2		2	1	120	GE3	3	crus2	Lcrus2	Lateral	2	5
f	0	19	4	13.4301	2	1	120	GE3	3	Crus2	LCrus2	Lateral	2	5
f	0	19	5	188.187	2	1	120	GE3	3	Crus2	LCrus2	Lateral	2	5
m	1	6	190819b_1709	24.0957	2	1	120	GE3	2	crus2	Lcrus2	Lateral	2	5
m	1	7	2	41.8911	2	1	120	GE3	3	crus2	Lcrus2	Lateral	2	5
m	1	8	3	122.251	2	1	120	GE3	3	crus2	Lcrus2	Lateral	2	5
m	1	9	4	79.8069	2	1	120	GE3	3	crus2	Lcrus2	Lateral	2	5
f	0	14	4		3	1	210	GE4	3	crus2	Lcrus2	Lateral	2	5
f	0	27		8.36283	3	1	210	GE4	3	crus2	Lcrus2	Lateral	2	5
f	0	28	6	105.961	3	1	210	GE4	3	crus2	Lcrus2	Lateral	2	5
m	1	16	2	147.294	3	1	210	GE4	2	crus2	Lcrus2	Lateral	2	5
m	1	16	3	67.4823	3	1	210	GE4	2	crus2	Lcrus2	Lateral	2	5
m	1	17	5	36.0077	3	1	210	GE4	2	crus2	Lcrus2	Lateral	2	5
m	1	17	6		3	1	210	GE4	2	crus2	Lcrus2	Lateral	2	5
m	1	29			3	1	210	GE4	3		lCrus2	Lateral	2	5
m	1	29			3	1	210	GE4	3		lCrus2	Lateral	2	5
f	0	23			4	1	400	GE1	3	Crus2	LCrus2	Lateral	2	5
f	0	24	4		4	1	400	GE1	3	Crus2	LCrus2	Lateral	2	5
m	1	20	6	192.398	4	1	400	GE1	3	Crus2	LCrus2	Lateral	2	5
m	1	22	8	98.3149	4	1	400	GE1	3	crus2	Lcrus2	Lateral	2	5
f	0	22		81.3886	1	2	45	GE2	3	Crus2	LCrus2	Lateral	2	5
f	0	22		63.57	1	2	45	GE2	3	Crus2	LCrus2	Lateral	2	5
m	1	3	190411a_1412	52.1713	1	2	45	GE2	2	crus2	Lcrus2	Lateral	2	5
m	1	3	2	30.04	1	2	45	GE2	2	crus2	Lcrus2	Lateral	2	5
m	1	3	3	24.8622	1	2	45	GE2	2	crus2	Lcrus2	Lateral	2	5
m	1	4	3	12.8978	1	2	45	GE2	2	crus2	Lcrus2	Lateral	2	5
m	1	4	4	4.65377	1	2	45	GE2	2	crus2	Lcrus2	Lateral	2	5
m	1	5	5	73.6182	1	2	45	GE2	2	crus2	Lcrus2	Lateral	2	5
m	1	5	6	27.1413	1	2	45	GE2	2	crus2	Lcrus2	Lateral	2	5
m	1	6	2	51.9887	1	2	45	GE2	3	crus2	Lcrus2	Lateral	2	5
f	0	8	4	24.7092	2	2	120	GE3	3	crus2	Lcrus2	Lateral	2	5
f	0	10		64.6242	2	2	120	GE3	3	crus2	Lcrus2	Lateral	2	5
f	0	11	190823b_1671	58.249	2	2	120	GE3	3	crus2	Lcrus2	Lateral	2	5
f	0	12	4	63.8363	2	2	120	GE3	3	crus2	Lcrus2	Lateral	2	5
f	0	12	5	106.383	2	2	120	GE3	3	crus2	Lcrus2	Lateral	2	5
m	1	13	6	103.568	2	2	120	GE3	2	crus2	Lcrus2	Lateral	2	5
m	1	14	2	56.2824	2	2	120	GE3	3	crus2	Lcrus2	Lateral	2	5
m	1	14	3	47.0978	2	2	120	GE3	3	crus2	Lcrus2	Lateral	2	5
m	1	19		20.5459	2	2	120	GE3	3	Crus2	LCrus2	Lateral	2	5
m	1	19		5.70773	2	2	120	GE3	3	Crus2	LCrus2	Lateral	2	5
f	0	15	2	79.455	3	2	210	GE4	2	crus2	Lcrus2	Lateral	2	5
f	0	15	3	39.8467	3	2	210	GE4	2	crus2	Lcrus2	Lateral	2	5
m	1	17	8	50.5401	3	2	210	GE4	3	Crus2	LCrus2	Lateral	2	5
m	1	17	9	50.193	3	2	210	GE4	3	Crus2	LCrus2	Lateral	2	5
m	1	21		84.6014	3	2	210	GE4	3	crus2	Lcrus2	Lateral	2	5
f	0	16		97.5877	4	2	400	GE1	3	Crus2	LCrus2	Lateral	2	5
f	0	16		6.32014	4	2	400	GE1	3	Crus2	LCrus2	Lateral	2	5
m	1	18	4		4	2	400	GE1	3	crus2	Lcrus2	Lateral	2	5
m	1	23		84.8903	4	2	400	GE1	3	crus2	Lcrus2	Lateral	2	5
m	1	23		45.4683	4	2	400	GE1	3	crus2	Lcrus2	Lateral	2	5
f	0	15		130.538	1	3	45	GE2	3	crus2	Lcrus2	Lateral	2	5
f	0	17		46.2024	1	3	45	GE2	3	crus2	Lcrus2	Lateral	2	5
f	0	17		57.8984	1	3	45	GE2	3	crus2	Lcrus2	Lateral	2	5
f	0	18	4	19.0226	1	3	45	GE2	3	crus2	Lcrus2	Lateral	2	5
m	1	3			1	3	45	GE2	3	Crus2	LCrus2	Lateral	2	5
m	1	10	4	141.312	1	3	45	GE2	3	Crus2	LCrus2	Lateral	2	5
f	0	1	2	54.2715	2	3	120	GE3	3	Crus2	LCrus2	Lateral	2	5
m	1	5		59.6773	2	3	120	GE3	3	crus2	Lcrus2	Lateral	2	5
m	1	19			2	3	120	GE3	3	crus2	Lcrus2	Lateral	2	5
m	1	19		29.9209	2	3	120	GE3	3	crus2	Lcrus2	Lateral	2	5
m	1	23		26.101	2	3	120	GE3	3	crus2	Lcrus2	Lateral	2	5
f	0	16	4		3	3	210	GE4	3	crus2	Lcrus2	Lateral	2	5
f	0	16	5	76.2624	3	3	210	GE4	3	crus2	Lcrus2	Lateral	2	5
f	0	20		161.724	3	3	210	GE4	3	crus2	Lcrus2	Lateral	2	5
f	0	20		24.1334	3	3	210	GE4	2	crus2	Lcrus2	Lateral	2	5
f	0	21	4		3	3	210	GE4	3	crus2	Lcrus2	Lateral	2	5
f	0	21	5	197.087	3	3	210	GE4	3	crus2	Lcrus2	Lateral	2	5
m	1	4		127.614	3	3	210	GE4	3	crus2	Lcrus2	Lateral	2	5
f	0	13		61.0818	4	3	400	GE1	3	crus2	Lcrus2	Lateral	2	5
f	0	25	5	120.232	4	3	400	GE1	3	crus2	Lcrus2	Lateral	2	5
m	1	12		153.637	4	3	400	GE1	3	crus2	Lcrus2	Lateral	2	5
m	1	12		121.186	4	3	400	GE1	3	crus2	Lcrus2	Lateral	2	5
m	1	22		40.1187	4	3	400	GE1	3	crus2	Lcrus2	Lateral	2	5
m	1	24		129.153	4	3	400	GE1	3	crus2	Lcrus2	Lateral	2	5
m	1	26	8	71.7283	4	3	400	GE1	2	crus2	Lcrus2	Lateral	2	5
m	1	26	9		4	3	400	GE1	2	crus2	Lcrus2	Lateral	2	5
f	0	2	10	116.485	1	4	45	GE2	3	crus2	Lcrus2	Lateral	2	5
f	0	2	11	70.479	1	4	45	GE2	3	crus2	Lcrus2	Lateral	2	5
f	0	2	12	127.514	1	4	45	GE2	3	crus2	Lcrus2	Lateral	2	5
f	0	2	13		1	4	45	GE2	3	crus2	Lcrus2		#N/A	5
f	0	4	2	64.5321	1	4	45	GE2	3	crus2	Lcrus2	Lateral	2	5
f	0	4	3	96.0679	1	4	45	GE2	3	crus2	Lcrus2	Lateral	2	5
f	0	5	2	29.3133	1	4	45	GE2	3	crus2	Lcrus2	Lateral	2	5
f	0	5	3	115.418	1	4	45	GE2	3	crus2	Lcrus2	Lateral	2	5
f	0	5	4	61.6739	1	4	45	GE2	3	crus2	Lcrus2	Lateral	2	5
f	0	6	2	26.4004	1	4	45	GE2	3	crus2	Lcrus2	Lateral	2	5
f	0	6	3	58.7679	1	4	45	GE2	3	crus2	Lcrus2	Lateral	2	5
m	1	1	4	51.3844	1	4	45	GE2	4	crus2	Lcrus2	Lateral	2	5
m	1	1	5	139.302	1	4	45	GE2	4	crus2	Lcrus2	Lateral	2	5
m	1	1	6	94.5099	1	4	45	GE2	4	crus2	Lcrus2	Lateral	2	5
m	1	1	7	29.4896	1	4	45	GE2	4	crus2	Lcrus2	Lateral	2	5
m	1	3	2		1	4	45	GE2	3	crus2	Lcrus2		#N/A	5
m	1	3	3		1	4	45	GE2	3	crus2	Lcrus2		#N/A	5
m	1	7	190619a_1756	19.7463	1	4	45	GE2	3	crus2	Lcrus2	Lateral	2	5
m	1	7	2	91.7583	1	4	45	GE2	3	crus2	Lcrus2	Lateral	2	5
m	1	8	5	185.334	1	4	45	GE2	3	crus2	Lcrus2	Lateral	2	5
m	1	8	6	13.392	1	4	45	GE2	3	crus2	Lcrus2	Lateral	2	5
f	0	10	5		2	4	120	GE3	3	crus2	Lcrus2		#N/A	5
f	0	10	6	78.5927	2	4	120	GE3	3	crus2	Lcrus2	Lateral	2	5
f	0	14	3	82.3753	2	4	120	GE3	3	crus2	Lcrus2	Lateral	2	5
f	0	14	4	81.8216	2	4	120	GE3	3	crus2	Lcrus2	Lateral	2	5
f	0	14	5	31.7221	2	4	120	GE3	3	crus2	Lcrus2	Lateral	2	5
m	1	11	4	48.1324	2	4	120	GE3	2	crus2	Lcrus2	Lateral	2	5
m	1	11	5		2	4	120	GE3	2	crus2	Lcrus2		#N/A	5
m	1	11	6	92.8383	2	4	120	GE3	2	crus2	Lcrus2	Lateral	2	5
m	1	12	3	175.487	2	4	120	GE3	2	crus2	Lcrus2	Lateral	2	5
m	1	13	3	130.165	2	4	120	GE3	3	crus2	Lcrus2	Lateral	2	5
m	1	13	4	135.075	2	4	120	GE3	3	crus2	Lcrus2	Lateral	2	5
m	1	16	3	65.5769	2	4	120	GE3	3	crus2	Lcrus2	Lateral	2	5
m	1	16	4		2	4	120	GE3	3	crus2	Lcrus2		#N/A	5
f	0	20	191031_1616	49.4312	3	4	210	GE4	2	crus2	Lcrus2	Lateral	2	5
f	0	20	3	160.27	3	4	210	GE4	2	crus2	Lcrus2	Lateral	2	5
f	0	20	4	160.337	3	4	210	GE4	2	crus2	Lcrus2	Lateral	2	5
f	0	23	2	8.87904	3	4	210	GE4	3	crus2	Lcrus2	Lateral	2	5
m	1	17	6	143.594	3	4	210	GE4	3	crus2	Lcrus2	Lateral	2	5
m	1	18	191004b_1447	4.79366	3	4	210	GE4	3	crus2	Lcrus2	Lateral	2	5
m	1	18	2	6.84153	3	4	210	GE4	3	crus2	Lcrus2	Lateral	2	5
m	1	18	3	70.963	3	4	210	GE4	3	crus2	Lcrus2	Lateral	2	5
m	1	18	4	109.244	3	4	210	GE4	3	crus2	Lcrus2	Lateral	2	5
f	0	25	3	33.9609	4	4	400	GE1	3	Crus2	LCrus2	Lateral	2	5
f	0	26	3	38.7821	4	4	400	GE1	3	Crus2	LCrus2	Lateral	2	5
f	0	27	3	119.169	4	4	400	GE1	3	Crus2	LCrus2	Lateral	2	5
m	1	28	6	81.9634	4	4	400	GE1	3	crus2	Lcrus2	Lateral	2	5
m	1	29	3	92.6364	4	4	400	GE1	3	crus2	Lcrus2	Lateral	2	5
m	1	30	4	81.3821	4	4	400	GE1	3	Crus2	LCrus2	Lateral	2	5
m	1	1	2	41.8605	3	5	210	GE4	3	crus2	Lcrus2	Lateral	2	5
m	1	1	3	103.113	3	5	210	GE4	3	crus2	Lcrus2	Lateral	2	5
f	0	6	7	143.39	4	5	400	GE1	3	Crus2	LCrus2	Lateral	2	5
m	1	4	2	52.1435	4	5	400	GE1	3	Crus2	LCrus2	Lateral	2	5
m	1	5	4		4	5	400	GE1	3	Crus2	LCrus2	Lateral	2	5
m	1	5	5		4	5	400	GE1	3	Crus2	LCrus2	Lateral	2	5
m	1	7	3	130.886	4	5	400	GE1	3	Crus2	LCrus2	Lateral	2	5
m	1	7	4	68.3764	4	5	400	GE1	3	Crus2	LCrus2	Lateral	2	5
m	1	7	5		4	5	400	GE1	3	crus2	Lcrus2	Lateral	2	5
f	0	3	5	20.4295	1	1	45	GE2	3	pm	Lpm	Lateral	2	6
f	0	4	190416_1374	93.0629	1	1	45	GE2	2	pm	Lpm	Lateral	2	6
f	0	4	2	98.1638	1	1	45	GE2	2	pm	Lpm	Lateral	2	6
f	0	12	4		1	1	45	GE2	3	pm	Lpm	Lateral	2	6
m	1	1	190114_1011	11.2297	1	1	45	GE2	3	pm	Lpm	Lateral	2	6
m	1	1	2	8.30312	1	1	45	GE2	3	pm	Lpm	Lateral	2	6
m	1	1	3	19.0321	1	1	45	GE2	3	pm	Lpm	Lateral	2	6
m	1	2	190115_1012	5.54871	1	1	45	GE2	4	pm	Lpm	Lateral	2	6
m	1	5	2	86.7827	1	1	45	GE2	3	pm	Lpm	Lateral	2	6
f	0	11	3	167.808	2	1	120	GE3	3	pm	Lpm	Lateral	2	6
f	0	19	2		2	1	120	GE3	3	PM	LPM	Lateral	2	6
f	0	19	3		2	1	120	GE3	3	PM	LPM	Lateral	2	6
m	1	7	190920a_1820	67.4344	2	1	120	GE3	3	pm	Lpm	Lateral	2	6
m	1	9	5	12.2567	2	1	120	GE3	3	pm	Lpm	Lateral	2	6
m	1	9	6	80.8369	2	1	120	GE3	3	pm	Lpm	Lateral	2	6
f	0	14	6	75.5023	3	1	210	GE4	3	pm	Lpm	Lateral	2	6
f	0	15	3	19.5618	3	1	210	GE4	3	pm	Lpm	Lateral	2	6
f	0	28	7	131.966	3	1	210	GE4	3	PM	LPM	Lateral	2	6
f	0	24	2	133.821	4	1	400	GE1	3	PM	LPM	Lateral	2	6
f	0	24	3	52.3828	4	1	400	GE1	3	PM	LPM	Lateral	2	6
f	0	25	5	68.0685	4	1	400	GE1	3	PM	LPM	Lateral	2	6
m	1	20	7	87.9727	4	1	400	GE1	3	PM	LPM	Lateral	2	6
m	1	20	8	77.0467	4	1	400	GE1	3	PM	LPM	Lateral	2	6
f	0	1	3	53.9382	1	2	45	GE2	3	pm	Lpm	Lateral	2	6
m	1	4	190412a_1413	40.4223	1	2	45	GE2	2	pm	Lpm	Lateral	2	6
m	1	4	2	106.826	1	2	45	GE2	2	pm	Lpm	Lateral	2	6
m	1	6	3	43.2865	1	2	45	GE2	3	pm	Lpm	Lateral	2	6
f	0	8	5	29.9914	2	2	120	GE3	3	pm	Lpm	Lateral	2	6
f	0	11		18.8668	2	2	120	GE3	3	pm	Lpm	Lateral	2	6
f	0	12	6	67.734	2	2	120	GE3	3	pm	Lpm	Lateral	2	6
m	1	13	7	146.7	2	2	120	GE3	2	pm	Lpm	Lateral	2	6
m	1	13	8	114.325	2	2	120	GE3	2	pm	Lpm	Lateral	2	6
m	1	14	191008_1874	44.0673	2	2	120	GE3	3	pm	Lpm	Lateral	2	6
m	1	19		74.1045	2	2	120	GE3	3	PM	LPM	Lateral	2	6
m	1	17	10	39.897	3	2	210	GE4	3	PM	LPM	Lateral	2	6
m	1	17	11	110.189	3	2	210	GE4	3	PM	LPM	Lateral	2	6
m	1	20		35.7318	3	2	210	GE4	3	PM	LPM	Lateral	2	6
m	1	21		75.9467	3	2	210	GE4	3	PM	LPM	Lateral	2	6
f	0	16		35.0095	4	2	400	GE1	3	PM	LPM	Lateral	2	6
m	1	18	5	61.4354	4	2	400	GE1	3	PM	LPM	Lateral	2	6
f	0	17		101.009	1	3	45	GE2	3	pm	Lpm	Lateral	2	6
f	0	18	2		1	3	45	GE2	3	pm	Lpm	Lateral	2	6
f	0	18	3	74.6208	1	3	45	GE2	3	pm	Lpm	Lateral	2	6
m	1	3		84.1536	1	3	45	GE2	3	PM	LPM	Lateral	2	6
m	1	10	3	48.7332	1	3	45	GE2	3	PM	LPM	Lateral	2	6
m	1	5			2	3	120	GE3	3	PM	LPM	Lateral	2	6
m	1	7		95.3194	2	3	120	GE3	3	PM	LPM	Lateral	2	6
m	1	4		21.2624	3	3	210	GE4	3	PM	LPM	Lateral	2	6
m	1	8		70.999	3	3	210	GE4	3	PM	LPM	Lateral	2	6
m	1	11	3		3	3	210	GE4	3	Pm	LPm	Lateral	2	6
f	0	13		107.162	4	3	400	GE1	3	pm	Lpm	Lateral	2	6
f	0	25	6	11.1212	4	3	400	GE1	3	pm	Lpm	Lateral	2	6
m	1	12			4	3	400	GE1	3	pm	Lpm	Lateral	2	6
m	1	12		68.6708	4	3	400	GE1	3	pm	Lpm	Lateral	2	6
m	1	22		109.973	4	3	400	GE1	3	pm	Lpm	Lateral	2	6
m	1	26	10	16.7948	4	3	400	GE1	2	pm	Lpm	Lateral	2	6
f	0	2	14	65.4747	1	4	45	GE2	3	pm	Lpm	Lateral	2	6
f	0	5	190611a_1726	99.7458	1	4	45	GE2	3	pm	Lpm	Lateral	2	6
f	0	6	190612b_1760	63.0735	1	4	45	GE2	3	pm	Lpm	Lateral	2	6
m	1	1	3	26.1591	1	4	45	GE2	4	pm	Lpm	Lateral	2	6
m	1	3	190422_1445		1	4	45	GE2	3	pm	Lpm		#N/A	6
f	0	9	190725a_1569	54.9223	2	4	120	GE3	3	pm	Lpm	Lateral	2	6
f	0	14	6	106.712	2	4	120	GE3	3	pm	Lpm	Lateral	2	6
m	1	13	190819a_1706	92.8735	2	4	120	GE3	3	pm	Lpm	Lateral	2	6
m	1	13	2	49.5277	2	4	120	GE3	3	pm	Lpm	Lateral	2	6
m	1	16	190903_1735	101.73	2	4	120	GE3	3	pm	Lpm	Lateral	2	6
m	1	16	2		2	4	120	GE3	3	pm	Lpm		#N/A	6
f	0	23	191111b_1645	33.7928	3	4	210	GE4	3	pm	Lpm	Lateral	2	6
m	1	17	7	29.7527	3	4	210	GE4	3	pm	Lpm	Lateral	2	6
f	0	27	2	93.5115	4	4	400	GE1	3	PM	LPM	Lateral	2	6
m	1	30	3		4	4	400	GE1	3	PM	LPM		#N/A	6
f	0	6	8	35.8217	4	5	400	GE1	3	PM	LPM	Lateral	2	6
f	0	8	7	127.15	4	5	400	GE1	3	PM	LPM	Lateral	2	6
f	0	4	15	94.7523	1	1	45	GE2	6	sim	isim	IntPosterior	4	7
f	0	13	7	75.0423	1	1	45	GE2	6	sim	isim	IntPosterior	4	7
m	1	2	14	83.1875	1	1	45	GE2	8	sim	isim	IntPosterior	4	7
m	1	5	7	67.27	1	1	45	GE2	6	sim	isim	IntPosterior	4	7
m	1	5	8	55.0763	1	1	45	GE2	6	sim	isim	IntPosterior	4	7
m	1	5	9	28.0163	1	1	45	GE2	6	sim	isim	IntPosterior	4	7
f	0	11	5	19.3518	2	1	120	GE3	6	sim	isim	IntPosterior	4	7
f	0	19	11		2	1	120	GE3	6	Sim	iSim	IntPosterior	4	7
m	1	7	11	80.5286	2	1	120	GE3	7	sim	isim	IntPosterior	4	7
f	0	14	8	68.9101	3	1	210	GE4	6	sim	isim	IntPosterior	4	7
f	0	15	9	86.0449	3	1	210	GE4	6	sim	isim	IntPosterior	4	7
f	0	28	8	126.94	3	1	210	GE4	6	sim	isim	IntPosterior	4	7
m	1	16	4	56.9389	3	1	210	GE4	6	sim	isim	IntPosterior	4	7
m	1	17	11	96.6615	3	1	210	GE4	6	sim	isim	IntPosterior	4	7
m	1	29		136.559	3	1	210	GE4	6		iSim	IntPosterior	4	7
f	0	23		9.58353	4	1	400	GE1	6	Sim	iSim	IntPosterior	4	7
f	0	24	12	4.94433	4	1	400	GE1	6	Sim	iSim	IntPosterior	4	7
f	0	26	4	10.8124	4	1	400	GE1	6	sim	isim	IntPosterior	4	7
f	0	26	5	81.3608	4	1	400	GE1	6	sim	isim	IntPosterior	4	7
m	1	20	9	76.5823	4	1	400	GE1	6	Sim	iSim	IntPosterior	4	7
m	1	21	9	53.294	4	1	400	GE1	6	sim	isim	IntPosterior	4	7
m	1	22	9	69.3225	4	1	400	GE1	6	sim	isim	IntPosterior	4	7
f	0	1	6	24.9691	1	2	45	GE2	6	sim	isim	IntPosterior	4	7
f	0	2	10	120.592	1	2	45	GE2	6	sim	isim	IntPosterior	4	7
f	0	2	11	49.1994	1	2	45	GE2	6	sim	isim	IntPosterior	4	7
f	0	2	12	58.3281	1	2	45	GE2	6	sim	isim	IntPosterior	4	7
f	0	2	13	17.3159	1	2	45	GE2	6	sim	isim	IntPosterior	4	7
f	0	2	14	76.4201	1	2	45	GE2	6	sim	isim	IntPosterior	4	7
f	0	7	6	10.5227	1	2	45	GE2	6	sim	isim	IntPosterior	4	7
f	0	7	7	128.308	1	2	45	GE2	6	sim	isim	IntPosterior	4	7
f	0	7	8	50.918	1	2	45	GE2	6	sim	isim	IntPosterior	4	7
f	0	22		43.6505	1	2	45	GE2	7	sim	isim	IntPosterior	4	7
m	1	4	9	55.2687	1	2	45	GE2	6	sim	isim	IntPosterior	4	7
m	1	4	10	47.6411	1	2	45	GE2	6	sim	isim	IntPosterior	4	7
m	1	4	11	34.7534	1	2	45	GE2	6	sim	isim	IntPosterior	4	7
m	1	4	12	31.4501	1	2	45	GE2	6	sim	isim	IntPosterior	4	7
m	1	5	10	57.1302	1	2	45	GE2	6	sim	isim	IntPosterior	4	7
m	1	5	11	27.756	1	2	45	GE2	6	sim	isim	IntPosterior	4	7
m	1	5	12	21.0806	1	2	45	GE2	6	sim	isim	IntPosterior	4	7
m	1	6	10	50.6915	1	2	45	GE2	7	sim	isim	IntPosterior	4	7
m	1	6	11	12.1281	1	2	45	GE2	7	sim	isim	IntPosterior	4	7
f	0	8	7	34.7045	2	2	120	GE3	7	sim	isim	IntPosterior	4	7
f	0	8	8	17.3222	2	2	120	GE3	7	sim	isim	IntPosterior	4	7
f	0	10		42.0772	2	2	120	GE3	6	sim	isim	IntPosterior	4	7
f	0	11		56.0984	2	2	120	GE3	7	sim	isim	IntPosterior	4	7
f	0	12	8	25.2423	2	2	120	GE3	5	sim	isim	IntPosterior	4	7
f	0	12	9	51.5305	2	2	120	GE3	5	sim	isim	IntPosterior	4	7
m	1	9	2	60.7605	2	2	120	GE3	6	sim	isim	IntPosterior	4	7
m	1	13	12	24.1716	2	2	120	GE3	6	sim	isim	IntPosterior	4	7
m	1	13	13	75.3022	2	2	120	GE3	6	sim	isim	IntPosterior	4	7
m	1	14	16	43.7757	2	2	120	GE3	6	sim	isim	IntPosterior	4	7
m	1	14	17	45.6323	2	2	120	GE3	6	sim	isim	IntPosterior	4	7
m	1	19		22.0154	2	2	120	GE3	6	Sim	iSim	IntPosterior	4	7
f	0	15	6	32.7829	3	2	210	GE4	6	sim	isim	IntPosterior	4	7
f	0	15	7	118.891	3	2	210	GE4	6	sim	isim	IntPosterior	4	7
m	1	17	13	67.1218	3	2	210	GE4	6	Sim	iSim	IntPosterior	4	7
m	1	20		16.1719	3	2	210	GE4	6	sim	isim	IntPosterior	4	7
m	1	21		49.7198	3	2	210	GE4	6	sim	isim	IntPosterior	4	7
f	0	16			4	2	400	GE1	6	sim	isim	IntPosterior	4	7
f	0	16		46.8276	4	2	400	GE1	6	sim	isim	IntPosterior	4	7
m	1	18	9	41.5417	4	2	400	GE1	7	sim	isim	IntPosterior	4	7
m	1	23		34.1554	4	2	400	GE1	6	sim	isim	IntPosterior	4	7
m	1	23		41.1372	4	2	400	GE1	5	sim	isim	IntPosterior	4	7
f	0	15		128.572	1	3	45	GE2	6	sim	isim	IntPosterior	4	7
f	0	18	8	97.5272	1	3	45	GE2	7	sim	isim	IntPosterior	4	7
f	0	18	9	95.6374	1	3	45	GE2	7	sim	isim	IntPosterior	4	7
m	1	3		15.6286	1	3	45	GE2	6	Sim	iSim	IntPosterior	4	7
m	1	9	4	115.073	1	3	45	GE2	6	sim	isim	IntPosterior	4	7
m	1	5		47.4353	2	3	120	GE3	6	sim	isim	IntPosterior	4	7
m	1	6		43.7083	2	3	120	GE3	6	sim	isim	IntPosterior	4	7
m	1	19		59.1126	2	3	120	GE3	6	sim	isim	IntPosterior	4	7
m	1	23		41.6399	2	3	120	GE3	6	sim	isim	IntPosterior	4	7
m	1	23			2	3	120	GE3	6	sim	isim	IntPosterior	4	7
f	0	20		28.5534	3	3	210	GE4	6	sim	isim	IntPosterior	4	7
f	0	21	7	29.4726	3	3	210	GE4	6	sim	isim	IntPosterior	4	7
f	0	21	8	54.3022	3	3	210	GE4	6	sim	isim	IntPosterior	4	7
m	1	8			3	3	210	GE4	6	sim	isim	IntPosterior	4	7
f	0	25	9	45.0785	4	3	400	GE1	6	sim	isim	IntPosterior	4	7
f	0	25	10	52.6671	4	3	400	GE1	6	sim	isim	IntPosterior	4	7
m	1	12			4	3	400	GE1	6	sim	isim	IntPosterior	4	7
m	1	24		129.521	4	3	400	GE1	6	sim	isim	IntPosterior	4	7
m	1	24		55.4175	4	3	400	GE1	7	sim	isim	IntPosterior	4	7
m	1	26	16	54.8516	4	3	400	GE1	6	sim	isim	IntPosterior	4	7
f	0	2	21	57.1164	1	4	45	GE2	7	sim	isim	IntPosterior	4	7
f	0	2	22	37.7717	1	4	45	GE2	7	sim	isim	IntPosterior	4	7
f	0	4	13	52.9793	1	4	45	GE2	7	sim	isim	IntPosterior	4	7
m	1	1	17	62.9626	1	4	45	GE2	7	sim	isim	IntPosterior	4	7
m	1	1	18	56.1629	1	4	45	GE2	7	sim	isim	IntPosterior	4	7
m	1	1	19	24.788	1	4	45	GE2	7	sim	isim	IntPosterior	4	7
m	1	3	9	137.798	1	4	45	GE2	7	sim	isim	IntPosterior	4	7
m	1	7	5	58.6009	1	4	45	GE2	7	sim	isim	IntPosterior	4	7
m	1	8	15	61.7395	1	4	45	GE2	6	sim	isim	IntPosterior	4	7
m	1	8	16	29.5737	1	4	45	GE2	6	sim	isim	IntPosterior	4	7
f	0	10	11	39.096	2	4	120	GE3	6	sim	isim	IntPosterior	4	7
f	0	14	8	60.6972	2	4	120	GE3	6	sim	isim	IntPosterior	4	7
f	0	19		125.364	3	4	210	GE4	6	sim	isim	IntPosterior	4	7
f	0	20	7	38.4041	3	4	210	GE4	6	sim	isim	IntPosterior	4	7
f	0	21	191101_1575	119.752	3	4	210	GE4	6	sim	isim	IntPosterior	4	7
m	1	17	9	55.9284	3	4	210	GE4	6	sim	isim	IntPosterior	4	7
m	1	18	6	42.9427	3	4	210	GE4	6	sim	isim	IntPosterior	4	7
f	0	24	6	160.727	4	4	400	GE1	5	Sim	iSim	IntPosterior	4	7
f	0	27	7	85.3139	4	4	400	GE1	6	sim	isim	IntPosterior	4	7
m	1	28	7	55.3278	4	4	400	GE1	6	sim	isim	IntPosterior	4	7
m	1	30	8	84.9791	4	4	400	GE1	6	sim	isim	IntPosterior	4	7
m	1	1	7	60.4066	3	5	210	GE4	6	sim	isim	IntPosterior	4	7
f	0	6	9	84.458	4	5	400	GE1	6	sim	isim	IntPosterior	4	7
f	0	8	8	111.755	4	5	400	GE1	6	Sim	iSim	IntPosterior	4	7
m	1	3	5	125.585	4	5	400	GE1	6	sim	isim	IntPosterior	4	7
m	1	4	6	22.1989	4	5	400	GE1	6	sim	isim	IntPosterior	4	7
m	1	5	7	15.0125	4	5	400	GE1	6	sim	isim	IntPosterior	4	7
f	0	3	9	68.6996	1	1	45	GE2	6	crus1	icrus1	IntPosterior	4	8
f	0	4	14	31.2742	1	1	45	GE2	6	crus1	icrus1	IntPosterior	4	8
f	0	13	8	51.0971	1	1	45	GE2	6	crus1	icrus1	IntPosterior	4	8
m	1	5	10	66.1577	1	1	45	GE2	6	crus1	icrus1	IntPosterior	4	8
f	0	11	7		2	1	120	GE3	6	crus1	icrus1	IntPosterior	4	8
f	0	19	12	33.586	2	1	120	GE3	6	Crus1	iCrus1	IntPosterior	4	8
m	1	7	12	129.639	2	1	120	GE3	7	crus1	icrus1	IntPosterior	4	8
m	1	7	13	20.6193	2	1	120	GE3	7	crus1	icrus1	IntPosterior	4	8
m	1	8	6	72.3357	2	1	120	GE3	7	crus1	icrus1	IntPosterior	4	8
m	1	9	11	79.7176	2	1	120	GE3	6	crus1	icrus1	IntPosterior	4	8
f	0	14	9	58.7738	3	1	210	GE4	6	crus1	icrus1	IntPosterior	4	8
f	0	15	8	86.0995	3	1	210	GE4	6	crus1	icrus1	IntPosterior	4	8
f	0	27		151.447	3	1	210	GE4	6	crus1	icrus1	IntPosterior	4	8
f	0	28	9	121.428	3	1	210	GE4	6	crus1	icrus1	IntPosterior	4	8
m	1	16	5		3	1	210	GE4	6	crus1	icrus1	IntPosterior	4	8
m	1	29		93.7591	3	1	210	GE4	6		iCrus1	IntPosterior	4	8
f	0	23		101.675	4	1	400	GE1	6	Crus1	iCrus1	IntPosterior	4	8
f	0	25	8	119.151	4	1	400	GE1	6	Crus1	iCrus1	IntPosterior	4	8
f	0	26	6	31.3598	4	1	400	GE1	6	crus1	icrus1	IntPosterior	4	8
f	0	26	7	84.671	4	1	400	GE1	6	crus1	icrus1	IntPosterior	4	8
m	1	21	8	116.788	4	1	400	GE1	6	crus1	icrus1	IntPosterior	4	8
f	0	22		125.795	1	2	45	GE2	7	Crus1	iCrus1	IntPosterior	4	8
m	1	4	13	31.4086	1	2	45	GE2	6	crus1	icrus1	IntPosterior	4	8
m	1	4	14	51.5667	1	2	45	GE2	6	crus1	icrus1	IntPosterior	4	8
m	1	4	15	78.4261	1	2	45	GE2	6	crus1	icrus1	IntPosterior	4	8
m	1	4	16	50.3933	1	2	45	GE2	6	crus1	icrus1	IntPosterior	4	8
m	1	6	8	64.5048	1	2	45	GE2	7	crus1	icrus1	IntPosterior	4	8
m	1	6	9	52.1051	1	2	45	GE2	7	crus1	icrus1	IntPosterior	4	8
f	0	12	10	76.0032	2	2	120	GE3	5	crus1	icrus1	IntPosterior	4	8
m	1	14	14	28.4308	2	2	120	GE3	6	crus1	icrus1	IntPosterior	4	8
m	1	14	15	64.2566	2	2	120	GE3	6	crus1	icrus1	IntPosterior	4	8
m	1	19		24.9375	2	2	120	GE3	6	Crus1	iCrus1	IntPosterior	4	8
m	1	17	15	25.7996	3	2	210	GE4	6	Crus1	iCrus1	IntPosterior	4	8
m	1	17	16	39.8226	3	2	210	GE4	6	crus1	icrus1	IntPosterior	4	8
m	1	20		40.512	3	2	210	GE4	6	crus1	icrus1	IntPosterior	4	8
m	1	21		25.7773	3	2	210	GE4	6	crus1	icrus1	IntPosterior	4	8
f	0	16		48.5761	4	2	400	GE1	6	crus1	icrus1	IntPosterior	4	8
f	0	16		64.0954	4	2	400	GE1	6	crus1	icrus1	IntPosterior	4	8
m	1	18	8	62.3544	4	2	400	GE1	7	crus1	icrus1	IntPosterior	4	8
m	1	23		49.2136	4	2	400	GE1	5	crus1	icrus1	IntPosterior	4	8
f	0	15		182.876	1	3	45	GE2	6	crus1	icrus1	IntPosterior	4	8
m	1	3			1	3	45	GE2	6	Crus1	iCrus1	IntPosterior	4	8
m	1	9	5	37.1574	1	3	45	GE2	6	Crus1	iCrus1	IntPosterior	4	8
f	0	1	6		2	3	120	GE3	6	Crus1	iCrus1	IntPosterior	4	8
f	0	1	7	100.454	2	3	120	GE3	6	Crus1	iCrus1	IntPosterior	4	8
m	1	7		49.0721	2	3	120	GE3	5	crus1	icrus1	IntPosterior	4	8
m	1	7		137.533	2	3	120	GE3	5	crus1	icrus1	IntPosterior	4	8
m	1	19		68.6645	2	3	120	GE3	6	crus1	icrus1	IntPosterior	4	8
m	1	19		16.9227	2	3	120	GE3	6	crus1	icrus1	IntPosterior	4	8
f	0	16	9	94.6054	3	3	210	GE4	6	crus1	icrus1	IntPosterior	4	8
f	0	20		45.3106	3	3	210	GE4	6	crus1	icrus1	IntPosterior	4	8
f	0	21	9	50.0669	3	3	210	GE4	6	crus1	icrus1	IntPosterior	4	8
m	1	4		67.7941	3	3	210	GE4	6	crus1	icrus1	IntPosterior	4	8
f	0	13		90.3822	4	3	400	GE1	6	crus1	icrus1	IntPosterior	4	8
f	0	14		35.742	4	3	400	GE1	6	crus1	icrus1	IntPosterior	4	8
f	0	25	11	75.1264	4	3	400	GE1	6	crus1	icrus1	IntPosterior	4	8
m	1	12		52.3779	4	3	400	GE1	6	crus1	icrus1	IntPosterior	4	8
m	1	22		134.137	4	3	400	GE1	6	crus1	icrus1	IntPosterior	4	8
m	1	24		127.565	4	3	400	GE1	7	crus1	icrus1	IntPosterior	4	8
f	0	4	11	96.7823	1	4	45	GE2	7	crus1	icrus1	IntPosterior	4	8
f	0	4	12	43.8344	1	4	45	GE2	7	crus1	icrus1	IntPosterior	4	8
f	0	5	8	64.3176	1	4	45	GE2	6	crus1	icrus1	IntPosterior	4	8
f	0	6	8	44.6822	1	4	45	GE2	7	crus1	icrus1	IntPosterior	4	8
f	0	6	9	84.4364	1	4	45	GE2	7	crus1	icrus1	IntPosterior	4	8
m	1	1	16	61.2187	1	4	45	GE2	7	crus1	icrus1	IntPosterior	4	8
m	1	3	10	84.2538	1	4	45	GE2	7	crus1	icrus1	IntPosterior	4	8
m	1	8	13	68.9242	1	4	45	GE2	6	crus1	icrus1	IntPosterior	4	8
m	1	8	14	36.2028	1	4	45	GE2	6	crus1	icrus1	IntPosterior	4	8
f	0	9	4	90.8724	2	4	120	GE3	5	crus1	icrus1	IntPosterior	4	8
f	0	10	10	55.3783	2	4	120	GE3	6	crus1	icrus1	IntPosterior	4	8
f	0	14	9	61.3396	2	4	120	GE3	6	crus1	icrus1	IntPosterior	4	8
f	0	15	2	93.3922	2	4	120	GE3	7	crus1	icrus1	IntPosterior	4	8
m	1	11	12	55.9171	2	4	120	GE3	6	crus1	icrus1	IntPosterior	4	8
m	1	12	7	60.323	2	4	120	GE3	5	crus1	icrus1	IntPosterior	4	8
m	1	13	9	121.586	2	4	120	GE3	6	crus1	icrus1	IntPosterior	4	8
m	1	13	10	52.9255	2	4	120	GE3	6	crus1	icrus1	IntPosterior	4	8
m	1	16	12	67.923	2	4	120	GE3	6	crus1	icrus1	IntPosterior	4	8
f	0	21	2		3	4	210	GE4	6	crus1	icrus1		#N/A	8
f	0	21	3		3	4	210	GE4	6	crus1	icrus1		#N/A	8
f	0	23	5	92.0092	3	4	210	GE4	6	crus1	icrus1	IntPosterior	4	8
m	1	22	3	87.6118	3	4	210	GE4	6	crus1	icrus1	IntPosterior	4	8
m	1	22	4	85.3367	3	4	210	GE4	6	crus1	icrus1	IntPosterior	4	8
f	0	24	5	1.57611	4	4	400	GE1	5	Crus1	iCrus1	IntPosterior	4	8
f	0	25	7		4	4	400	GE1	6	Crus1	iCrus1		#N/A	8
f	0	26	7	66.3317	4	4	400	GE1	6	crus1	icrus1	IntPosterior	4	8
m	1	28	8	44.7599	4	4	400	GE1	6	crus1	icrus1	IntPosterior	4	8
m	1	29	5	32.9792	4	4	400	GE1	6	crus1	icrus1	IntPosterior	4	8
m	1	30	9	57.5854	4	4	400	GE1	6	crus1	icrus1	IntPosterior	4	8
m	1	1	6	132.55	3	5	210	GE4	6	crus1	icrus1	IntPosterior	4	8
m	1	5	8	53.5347	4	5	400	GE1	6	Crus1	iCrus1	IntPosterior	4	8
m	1	7	9	57.3983	4	5	400	GE1	6	Crus1	iCrus1	IntPosterior	4	8
m	1	7	10		4	5	400	GE1	6	crus1	icrus1	IntPosterior	4	8
m	1	10	6	91.4566	4	5	400	GE1	6	crus1	icrus1	IntPosterior	4	8
f	0	4	13	114.576	1	1	45	GE2	6	crus2	icrus2	IntPosterior	4	9
f	0	12	6		1	1	45	GE2	6	crus2	icrus2	IntPosterior	4	9
f	0	13	6	59.4093	1	1	45	GE2	6	crus2	icrus2	IntPosterior	4	9
f	0	13	9		1	1	45	GE2	6	crus2	icrus2	IntPosterior	4	9
m	1	2	15	12.4395	1	1	45	GE2	8	crus2	icrus2	IntPosterior	4	9
m	1	2	16	123.353	1	1	45	GE2	8	crus2	icrus2	IntPosterior	4	9
m	1	5	11	131.146	1	1	45	GE2	6	crus2	icrus2	IntPosterior	4	9
m	1	5	12	115.977	1	1	45	GE2	6	crus2	icrus2	IntPosterior	4	9
m	1	5	13	55.559	1	1	45	GE2	6	crus2	icrus2	IntPosterior	4	9
f	0	10	4		2	1	120	GE3	6	crus2	icrus2	IntPosterior	4	9
f	0	19	13		2	1	120	GE3	6	Crus2	iCrus2	IntPosterior	4	9
m	1	6	6	147.218	2	1	120	GE3	5	crus2	icrus2	IntPosterior	4	9
m	1	6	7	70.1684	2	1	120	GE3	5	crus2	icrus2	IntPosterior	4	9
m	1	8	5	17.2435	2	1	120	GE3	7	crus2	icrus2	IntPosterior	4	9
m	1	8	7	89.3814	2	1	120	GE3	7	crus2	icrus2	IntPosterior	4	9
f	0	14	10	155.621	3	1	210	GE4	6	crus2	icrus2	IntPosterior	4	9
f	0	15	7	108.693	3	1	210	GE4	6	crus2	icrus2	IntPosterior	4	9
m	1	16	6	74.3969	3	1	210	GE4	6	crus2	icrus2	IntPosterior	4	9
m	1	16	7		3	1	210	GE4	6	crus2	icrus2	IntPosterior	4	9
m	1	29		102.421	3	1	210	GE4	6		iCrus2	IntPosterior	4	9
m	1	29			3	1	210	GE4	6		iCrus2	IntPosterior	4	9
f	0	24	11	137.57	4	1	400	GE1	6	Crus2	iCrus2	IntPosterior	4	9
f	0	25	7	46.8286	4	1	400	GE1	6	Crus2	iCrus2	IntPosterior	4	9
f	0	26	8	134.794	4	1	400	GE1	6	crus2	icrus2	IntPosterior	4	9
f	0	26	9	110.662	4	1	400	GE1	6	crus2	icrus2	IntPosterior	4	9
m	1	21	7	26.2241	4	1	400	GE1	6	crus2	icrus2	IntPosterior	4	9
m	1	22	10	121.612	4	1	400	GE1	6	crus2	icrus2	IntPosterior	4	9
f	0	22		24.5427	1	2	45	GE2	7	Crus2	iCrus2	IntPosterior	4	9
m	1	3	10	13.6551	1	2	45	GE2	6	crus2	icrus2	IntPosterior	4	9
m	1	3	11	47.007	1	2	45	GE2	6	crus2	icrus2	IntPosterior	4	9
m	1	3	12	63.1373	1	2	45	GE2	6	crus2	icrus2	IntPosterior	4	9
m	1	4	17	51.1243	1	2	45	GE2	6	crus2	icrus2	IntPosterior	4	9
m	1	5	13	24.5295	1	2	45	GE2	6	crus2	icrus2	IntPosterior	4	9
m	1	6	7	92.5873	1	2	45	GE2	7	crus2	icrus2	IntPosterior	4	9
f	0	8	6	78.2759	2	2	120	GE3	7	crus2	icrus2	IntPosterior	4	9
f	0	10		103.522	2	2	120	GE3	6	crus2	icrus2	IntPosterior	4	9
f	0	11			2	2	120	GE3	7	crus2	icrus2	IntPosterior	4	9
m	1	9	3	107.879	2	2	120	GE3	6	crus2	icrus2	IntPosterior	4	9
m	1	14	12	71.8866	2	2	120	GE3	6	crus2	icrus2	IntPosterior	4	9
m	1	14	13	34.188	2	2	120	GE3	6	crus2	icrus2	IntPosterior	4	9
m	1	19		69.4811	2	2	120	GE3	6	Crus2	iCrus2	IntPosterior	4	9
f	0	15	4	38.2289	3	2	210	GE4	6	crus2	icrus2	IntPosterior	4	9
m	1	17	17	34.1736	3	2	210	GE4	6	Crus2	iCrus2	IntPosterior	4	9
m	1	20		45.2167	3	2	210	GE4	6	crus2	icrus2	IntPosterior	4	9
m	1	21		72.259	3	2	210	GE4	6	crus2	icrus2	IntPosterior	4	9
m	1	23		51.2354	4	2	400	GE1	5	crus2	icrus2	IntPosterior	4	9
f	0	15		24.5291	1	3	45	GE2	6	crus2	icrus2	IntPosterior	4	9
f	0	17		82.8321	1	3	45	GE2	6	crus2	icrus2	IntPosterior	4	9
m	1	9	6	43.2692	1	3	45	GE2	6	Crus2	iCrus2	IntPosterior	4	9
m	1	9	7	142.153	1	3	45	GE2	6	Crus2	iCrus2	IntPosterior	4	9
f	0	1	8	81.242	2	3	120	GE3	6	Crus2	iCrus2	IntPosterior	4	9
m	1	5		77.4499	2	3	120	GE3	6	crus2	icrus2	IntPosterior	4	9
m	1	6		111.552	2	3	120	GE3	6	crus2	icrus2	IntPosterior	4	9
m	1	7		104.089	2	3	120	GE3	5	crus2	icrus2	IntPosterior	4	9
m	1	7		17.3075	2	3	120	GE3	5	crus2	icrus2	IntPosterior	4	9
m	1	19			2	3	120	GE3	6	crus2	icrus2	IntPosterior	4	9
m	1	19		58.7862	2	3	120	GE3	6	crus2	icrus2	IntPosterior	4	9
m	1	23		44.7511	2	3	120	GE3	6	crus2	icrus2	IntPosterior	4	9
f	0	16	10	71.8838	3	3	210	GE4	6	crus2	icrus2	IntPosterior	4	9
f	0	20		95.2549	3	3	210	GE4	6	crus2	icrus2	IntPosterior	4	9
m	1	4		45.5389	3	3	210	GE4	6	crus2	icrus2	IntPosterior	4	9
m	1	8		60.2315	3	3	210	GE4	6	crus2	icrus2	IntPosterior	4	9
f	0	13		37.0733	4	3	400	GE1	6	crus2	icrus2	IntPosterior	4	9
f	0	25	12	136.493	4	3	400	GE1	6	crus2	icrus2	IntPosterior	4	9
m	1	12		60.6388	4	3	400	GE1	6	crus2	icrus2	IntPosterior	4	9
m	1	22		42.5145	4	3	400	GE1	6	crus2	icrus2	IntPosterior	4	9
m	1	24		51.7476	4	3	400	GE1	6	crus2	icrus2	IntPosterior	4	9
m	1	24		96.8171	4	3	400	GE1	7	crus2	icrus2	IntPosterior	4	9
m	1	26	15	74.777	4	3	400	GE1	6	crus2	icrus2	IntPosterior	4	9
f	0	2	23	84.0217	1	4	45	GE2	7	crus2	icrus2	IntPosterior	4	9
f	0	6	6	20.5935	1	4	45	GE2	7	crus2	icrus2	IntPosterior	4	9
f	0	6	7	57.128	1	4	45	GE2	7	crus2	icrus2	IntPosterior	4	9
m	1	1	15	51.3709	1	4	45	GE2	7	crus2	icrus2	IntPosterior	4	9
m	1	8	11	30.8264	1	4	45	GE2	6	crus2	icrus2	IntPosterior	4	9
m	1	8	12	86.431	1	4	45	GE2	6	crus2	icrus2	IntPosterior	4	9
f	0	10	9	69.5264	2	4	120	GE3	6	crus2	icrus2	IntPosterior	4	9
f	0	14	10	41.2864	2	4	120	GE3	6	crus2	icrus2	IntPosterior	4	9
f	0	14	11	165.025	2	4	120	GE3	6	crus2	icrus2	IntPosterior	4	9
f	0	15	5	56.6057	2	4	120	GE3	7	crus2	icrus2	IntPosterior	4	9
m	1	11	10	75.6791	2	4	120	GE3	6	crus2	icrus2	IntPosterior	4	9
m	1	11	11	124.072	2	4	120	GE3	6	crus2	icrus2	IntPosterior	4	9
m	1	12	5	75.9602	2	4	120	GE3	5	crus2	icrus2	IntPosterior	4	9
m	1	12	6	59.5739	2	4	120	GE3	5	crus2	icrus2	IntPosterior	4	9
m	1	16	11	134.936	2	4	120	GE3	6	crus2	icrus2	IntPosterior	4	9
f	0	20	8		3	4	210	GE4	6	crus2	icrus2		#N/A	9
f	0	20	9	75.2589	3	4	210	GE4	6	crus2	icrus2	IntPosterior	4	9
f	0	23	4	138.013	3	4	210	GE4	6	crus2	icrus2	IntPosterior	4	9
m	1	17	8	35.5655	3	4	210	GE4	6	crus2	icrus2	IntPosterior	4	9
m	1	18	7	104.683	3	4	210	GE4	6	crus2	icrus2	IntPosterior	4	9
f	0	24	4	104.905	4	4	400	GE1	5	Crus2	iCrus2	IntPosterior	4	9
f	0	25	8	28.7534	4	4	400	GE1	6	Crus2	iCrus2	IntPosterior	4	9
f	0	26	6	71.9728	4	4	400	GE1	6	crus2	icrus2	IntPosterior	4	9
m	1	28	9	70.3687	4	4	400	GE1	6	crus2	icrus2	IntPosterior	4	9
m	1	29	6	121.343	4	4	400	GE1	6	crus2	icrus2	IntPosterior	4	9
m	1	1	5	70.8178	3	5	210	GE4	6	crus2	icrus2	IntPosterior	4	9
f	0	6	10	63.953	4	5	400	GE1	6	Crus2	iCrus2	IntPosterior	4	9
m	1	3	4		4	5	400	GE1	6	crus2	icrus2	IntPosterior	4	9
m	1	4	7	60.6346	4	5	400	GE1	6	Crus2	iCrus2	IntPosterior	4	9
m	1	5	9		4	5	400	GE1	6	Crus2	iCrus2	IntPosterior	4	9
m	1	7	11		4	5	400	GE1	6	Crus2	iCrus2	IntPosterior	4	9
m	1	10	5		4	5	400	GE1	6	crus2	icrus2	IntPosterior	4	9
f	0	3	10	77.1388	1	1	45	GE2	6	pm	ipm	IntPosterior	4	10
f	0	3	11	95.4777	1	1	45	GE2	6	pm	ipm	IntPosterior	4	10
f	0	4	12	74.0849	1	1	45	GE2	6	pm	ipm	IntPosterior	4	10
f	0	12	7		1	1	45	GE2	6	pm	ipm	IntPosterior	4	10
m	1	5	14	75.8934	1	1	45	GE2	6	pm	ipm	IntPosterior	4	10
f	0	18	3	91.8438	2	1	120	GE3	7	pm	ipm	IntPosterior	4	10
f	0	18			2	1	120	GE3	7	pm	ipm	IntPosterior	4	10
f	0	19	14	39.6824	2	1	120	GE3	6	PM	iPM	IntPosterior	4	10
f	0	19	15	146.759	2	1	120	GE3	6	PM	iPM	IntPosterior	4	10
m	1	6	5		2	1	120	GE3	5	pm	ipm	IntPosterior	4	10
m	1	9	10		2	1	120	GE3	6	pm	ipm	IntPosterior	4	10
f	0	15	6		3	1	210	GE4	6	pm	ipm	IntPosterior	4	10
f	0	27		2.26554	3	1	210	GE4	6	pm	ipm	IntPosterior	4	10
f	0	28	10	131.16	3	1	210	GE4	6	pm	ipm	IntPosterior	4	10
m	1	17	12	114.646	3	1	210	GE4	6	pm	ipm	IntPosterior	4	10
m	1	29			3	1	210	GE4	6		iPM	IntPosterior	4	10
f	0	23		70.757	4	1	400	GE1	6	PM	iPM	IntPosterior	4	10
f	0	24	10	10.5971	4	1	400	GE1	6	PM	iPM	IntPosterior	4	10
f	0	25	9	72.0675	4	1	400	GE1	6	PM	iPM	IntPosterior	4	10
f	0	26	10	71.5668	4	1	400	GE1	6	PM	iPM	IntPosterior	4	10
m	1	22	11	55.5321	4	1	400	GE1	6	PM	iPM	IntPosterior	4	10
f	0	1	5	7.98669	1	2	45	GE2	6	pm	ipm	IntPosterior	4	10
f	0	2	7	46.3503	1	2	45	GE2	6	pm	ipm	IntPosterior	4	10
f	0	2	8	46.0714	1	2	45	GE2	6	pm	ipm	IntPosterior	4	10
f	0	2	9	48.4996	1	2	45	GE2	6	pm	ipm	IntPosterior	4	10
f	0	22		90.5766	1	2	45	GE2	7	PM	iPM	IntPosterior	4	10
m	1	3	13	63.9149	1	2	45	GE2	6	pm	ipm	IntPosterior	4	10
m	1	3	14	69.6851	1	2	45	GE2	6	pm	ipm	IntPosterior	4	10
m	1	3	15	17.6635	1	2	45	GE2	6	pm	ipm	IntPosterior	4	10
m	1	6	5	57.5404	1	2	45	GE2	7	pm	ipm	IntPosterior	4	10
m	1	6	6	96.3516	1	2	45	GE2	7	pm	ipm	IntPosterior	4	10
f	0	11		14.8045	2	2	120	GE3	7	pm	ipm	IntPosterior	4	10
f	0	12	11	163.523	2	2	120	GE3	5	pm	ipm	IntPosterior	4	10
f	0	12	12	5.05221	2	2	120	GE3	5	pm	ipm	IntPosterior	4	10
f	0	12	13	25.37	2	2	120	GE3	5	pm	ipm	IntPosterior	4	10
m	1	9	4	54.0176	2	2	120	GE3	6	pm	ipm	IntPosterior	4	10
m	1	9	5	98.4383	2	2	120	GE3	6	pm	ipm	IntPosterior	4	10
m	1	14	10	47.3956	2	2	120	GE3	6	pm	ipm	IntPosterior	4	10
m	1	14	11	59.0139	2	2	120	GE3	6	pm	ipm	IntPosterior	4	10
m	1	19		64.0252	2	2	120	GE3	6	PM	iPM	IntPosterior	4	10
m	1	20		46.6823	3	2	210	GE4	6	PM	iPM	IntPosterior	4	10
m	1	21		64.4024	3	2	210	GE4	6	PM	iPM	IntPosterior	4	10
m	1	18	7		4	2	400	GE1	7	PM	iPM	IntPosterior	4	10
m	1	23		49.6357	4	2	400	GE1	5	pm	ipm	IntPosterior	4	10
f	0	15		87.6226	1	3	45	GE2	6	pm	ipm	IntPosterior	4	10
f	0	17		70.5905	1	3	45	GE2	6	pm	ipm	IntPosterior	4	10
m	1	2	3	73.3074	1	3	45	GE2	6	PM	iPM	IntPosterior	4	10
m	1	9	8	104.828	1	3	45	GE2	6	PM	iPM	IntPosterior	4	10
m	1	10	7	9.05056	1	3	45	GE2	7	PM	iPM	IntPosterior	4	10
m	1	6		70.0674	2	3	120	GE3	6	PM	iPM	IntPosterior	4	10
m	1	19		55.7064	2	3	120	GE3	6	pm	ipm	IntPosterior	4	10
m	1	23		107.67	2	3	120	GE3	6	pm	ipm	IntPosterior	4	10
m	1	23			2	3	120	GE3	6	pm	ipm	IntPosterior	4	10
f	0	20		119.158	3	3	210	GE4	6	pm	ipm	IntPosterior	4	10
f	0	21	10	137.139	3	3	210	GE4	6	pm	ipm	IntPosterior	4	10
m	1	4		24.3443	3	3	210	GE4	6	pm	ipm	IntPosterior	4	10
m	1	8		73.1417	3	3	210	GE4	6	PM	iPM	IntPosterior	4	10
m	1	11	5	28.0457	3	3	210	GE4	6	PM	iPM	IntPosterior	4	10
f	0	14			4	3	400	GE1	6	pm	ipm	IntPosterior	4	10
f	0	25	13	124.251	4	3	400	GE1	6	pm	ipm	IntPosterior	4	10
m	1	12		49.7361	4	3	400	GE1	6	pm	ipm	IntPosterior	4	10
m	1	22		37.789	4	3	400	GE1	6	pm	ipm	IntPosterior	4	10
m	1	24		87.1601	4	3	400	GE1	6	pm	ipm	IntPosterior	4	10
m	1	24		72.2383	4	3	400	GE1	6	pm	ipm	IntPosterior	4	10
m	1	26	13	40.2689	4	3	400	GE1	6	pm	ipm	IntPosterior	4	10
m	1	26	14	46.8362	4	3	400	GE1	6	pm	ipm	IntPosterior	4	10
f	0	2	24	87.0516	1	4	45	GE2	7	pm	ipm	IntPosterior	4	10
f	0	2	25	45.493	1	4	45	GE2	7	pm	ipm	IntPosterior	4	10
m	1	1	12	51.1129	1	4	45	GE2	7	pm	ipm	IntPosterior	4	10
m	1	1	13	78.0629	1	4	45	GE2	7	pm	ipm	IntPosterior	4	10
m	1	1	14	59.7688	1	4	45	GE2	7	pm	ipm	IntPosterior	4	10
m	1	8	9	32.6315	1	4	45	GE2	6	pm	ipm	IntPosterior	4	10
m	1	8	10	115.313	1	4	45	GE2	6	pm	ipm	IntPosterior	4	10
f	0	9	3	82.017	2	4	120	GE3	5	pm	ipm	IntPosterior	4	10
f	0	10	8	105.176	2	4	120	GE3	6	pm	ipm	IntPosterior	4	10
f	0	14	12	97.2673	2	4	120	GE3	6	pm	ipm	IntPosterior	4	10
m	1	11	8	48.0115	2	4	120	GE3	6	pm	ipm	IntPosterior	4	10
m	1	11	9	91.8679	2	4	120	GE3	6	pm	ipm	IntPosterior	4	10
m	1	12	4	43.6373	2	4	120	GE3	5	pm	ipm	IntPosterior	4	10
m	1	13	8	80.8111	2	4	120	GE3	6	pm	ipm	IntPosterior	4	10
m	1	16	10		2	4	120	GE3	6	pm	ipm		#N/A	10
f	0	20	10		3	4	210	GE4	6	pm	ipm		#N/A	10
f	0	23	3	160.135	3	4	210	GE4	6	pm	ipm	IntPosterior	4	10
m	1	18	8	104.807	3	4	210	GE4	6	pm	ipm	IntPosterior	4	10
f	0	24	3	94.7732	4	4	400	GE1	5	PM	iPM	IntPosterior	4	10
f	0	25	6	38.8201	4	4	400	GE1	6	PM	iPM	IntPosterior	4	10
f	0	27	9	28.1532	4	4	400	GE1	6	pm	ipm	IntPosterior	4	10
m	1	28	10	88.8762	4	4	400	GE1	6	PM	iPM	IntPosterior	4	10
m	1	29	7	59.8463	4	4	400	GE1	6	PM	iPM	IntPosterior	4	10
m	1	30	10		4	4	400	GE1	6	PM	iPM		#N/A	10
f	0	6	11	21.0299	4	5	400	GE1	6	PM	iPM	IntPosterior	4	10
f	0	8	9	77.1162	4	5	400	GE1	6	PM	iPM	IntPosterior	4	10
m	1	2	5	35.5808	4	5	400	GE1	6	pm	ipm	IntPosterior	4	10
m	1	3	3	18.5649	4	5	400	GE1	6	pm	ipm	IntPosterior	4	10
m	1	5	10	90.5152	4	5	400	GE1	6	PM	iPM	IntPosterior	4	10
m	1	7	12	77.3399	4	5	400	GE1	6	pm	ipm	IntPosterior	4	10
m	1	10	4	110.303	4	5	400	GE1	6	PM	iPM	IntPosterior	4	10
m	1	10	7	30.8627	4	5	400	GE1	6	PM	iPM	IntPosterior	4	10
f	0	3	12	18.7598	1	1	45	GE2	6	cop	icop	IntPosterior	4	11
f	0	4	10	6.5249	1	1	45	GE2	6	cop	icop	IntPosterior	4	11
f	0	4	11	120.138	1	1	45	GE2	6	cop	icop	IntPosterior	4	11
f	0	13	10	98.7049	1	1	45	GE2	6	cop	icop	IntPosterior	4	11
f	0	13	11	56.4065	1	1	45	GE2	6	cop	icop	IntPosterior	4	11
m	1	5	15	184.192	1	1	45	GE2	6	cop	icop	IntPosterior	4	11
f	0	18		127.153	2	1	120	GE3	7	cop	icop	IntPosterior	4	11
m	1	6	4	127.253	2	1	120	GE3	5	cop	icop	IntPosterior	4	11
m	1	7	14	88.2149	2	1	120	GE3	7	cop	icop	IntPosterior	4	11
m	1	16	8	47.4579	3	1	210	GE4	6	cop	icop	IntPosterior	4	11
m	1	29		154.885	3	1	210	GE4	6		iCop	IntPosterior	4	11
f	0	24	9	26.3343	4	1	400	GE1	6	cop	icop	IntPosterior	4	11
f	0	25	6	67.4898	4	1	400	GE1	6	Cop	iCop	IntPosterior	4	11
f	0	2	5	53.7738	1	2	45	GE2	6	cop	icop	IntPosterior	4	11
f	0	2	6	62.0288	1	2	45	GE2	6	cop	icop	IntPosterior	4	11
m	1	5	14	54.4376	1	2	45	GE2	6	cop	icop	IntPosterior	4	11
m	1	6	4	42.7387	1	2	45	GE2	7	cop	icop	IntPosterior	4	11
f	0	10		10.4666	2	2	120	GE3	6	cop	icop	IntPosterior	4	11
f	0	10		41.2628	2	2	120	GE3	6	cop	icop	IntPosterior	4	11
m	1	9	6	41.4758	2	2	120	GE3	6	cop	icop	IntPosterior	4	11
m	1	14	18	13.5233	2	2	120	GE3	6	cop	icop	IntPosterior	4	11
m	1	19		33.2156	2	2	120	GE3	6	Cop	iCop	IntPosterior	4	11
m	1	17	18	17.6497	3	2	210	GE4	6	cop	icop	IntPosterior	4	11
m	1	20		45.4707	3	2	210	GE4	6	cop	icop	IntPosterior	4	11
m	1	21		53.3413	3	2	210	GE4	6	cop	icop	IntPosterior	4	11
m	1	18	6	28.4259	4	2	400	GE1	7	cop	icop	IntPosterior	4	11
m	1	23		30.3583	4	2	400	GE1	7	cop	icop	IntPosterior	4	11
m	1	23		17.1381	4	2	400	GE1	5	cop	icop	IntPosterior	4	11
f	0	15		88.6779	1	3	45	GE2	6	cop	icop	IntPosterior	4	11
f	0	17		60.5508	1	3	45	GE2	6	cop	icop	IntPosterior	4	11
m	1	2	2	68.0433	1	3	45	GE2	6	Cop	iCop	IntPosterior	4	11
m	1	3		102.402	1	3	45	GE2	6	Cop	iCop	IntPosterior	4	11
m	1	9	9	137.417	1	3	45	GE2	6	cop	icop	IntPosterior	4	11
m	1	7		40.9551	2	3	120	GE3	5	cop	icop	IntPosterior	4	11
m	1	19		90.0067	2	3	120	GE3	6	cop	icop	IntPosterior	4	11
m	1	19			2	3	120	GE3	6	cop	icop	IntPosterior	4	11
f	0	16	11		3	3	210	GE4	6	cop	icop	IntPosterior	4	11
f	0	20			3	3	210	GE4	6	cop	icop	IntPosterior	4	11
f	0	20		124.298	3	3	210	GE4	6	cop	icop	IntPosterior	4	11
m	1	4		67.9291	3	3	210	GE4	6	cop	icop	IntPosterior	4	11
f	0	14		33.5392	4	3	400	GE1	6	cop	icop	IntPosterior	4	11
f	0	25	14	67.4165	4	3	400	GE1	6	cop	icop	IntPosterior	4	11
m	1	22		13.8958	4	3	400	GE1	6	cop	icop	IntPosterior	4	11
m	1	24		25.5737	4	3	400	GE1	7	cop	icop	IntPosterior	4	11
m	1	26	11		4	3	400	GE1	6	cop	icop	IntPosterior	4	11
m	1	26	12	65.8576	4	3	400	GE1	6	cop	icop	IntPosterior	4	11
f	0	2	26	47.3415	1	4	45	GE2	7	cop	icop	IntPosterior	4	11
f	0	2	27	28.8728	1	4	45	GE2	7	cop	icop	IntPosterior	4	11
f	0	4	6	32.4254	1	4	45	GE2	7	cop	icop	IntPosterior	4	11
f	0	4	7	45.8322	1	4	45	GE2	7	cop	icop	IntPosterior	4	11
f	0	4	8	83.6418	1	4	45	GE2	7	cop	icop	IntPosterior	4	11
f	0	4	9	137.444	1	4	45	GE2	7	cop	icop	IntPosterior	4	11
f	0	4	10	50.9853	1	4	45	GE2	7	cop	icop	IntPosterior	4	11
m	1	1	10	22.2706	1	4	45	GE2	7	cop	icop	IntPosterior	4	11
m	1	1	11	30.8311	1	4	45	GE2	7	cop	icop	IntPosterior	4	11
m	1	8	7	65.1801	1	4	45	GE2	6	cop	icop	IntPosterior	4	11
m	1	8	8	41.574	1	4	45	GE2	6	cop	icop	IntPosterior	4	11
f	0	9	2	87.7372	2	4	120	GE3	5	cop	icop	IntPosterior	4	11
f	0	10	7	56.5192	2	4	120	GE3	6	cop	icop	IntPosterior	4	11
m	1	12	8	45.3193	2	4	120	GE3	5	cop	icop	IntPosterior	4	11
m	1	13	7		2	4	120	GE3	6	cop	icop		#N/A	11
m	1	16	9	86.4296	2	4	120	GE3	6	cop	icop	IntPosterior	4	11
m	1	22	5	63.1011	3	4	210	GE4	6	cop	icop	IntPosterior	4	11
f	0	25	5	5.35583	4	4	400	GE1	6	cop	icop	IntPosterior	4	11
f	0	26	5		4	4	400	GE1	6	cop	icop		#N/A	11
m	1	29	8	32.5285	4	4	400	GE1	6	cop	icop	IntPosterior	4	11
m	1	1	4	50.447	3	5	210	GE4	6	cop	icop	IntPosterior	4	11
m	1	2	4	60.0243	4	5	400	GE1	6	cop	icop	IntPosterior	4	11
m	1	4	8		4	5	400	GE1	6	cop	icop	IntPosterior	4	11
m	1	5	11	33.5528	4	5	400	GE1	6	Cop	iCop	IntPosterior	4	11
f	0	3	8	72.6967	1	1	45	GE2	6	4/5	i4/5	IntAnterior	3	12
f	0	12	5	81.3264	1	1	45	GE2	6	4/5	i4/5	IntAnterior	3	12
m	1	1	21	50.3355	1	1	45	GE2	7	4/5	i4/5	IntAnterior	3	12
m	1	2	11	92.531	1	1	45	GE2	8	4/5	i4/5	IntAnterior	3	12
m	1	2	12	85.6253	1	1	45	GE2	8	4/5	i4/5	IntAnterior	3	12
m	1	2	13	48.2362	1	1	45	GE2	8	4/5	i4/5	IntAnterior	3	12
m	1	5	6		1	1	45	GE2	6	4/5	i4/5	IntAnterior	3	12
f	0	11	6	54.175	2	1	120	GE3	6	4/5	i4/5	IntAnterior	3	12
f	0	18	2		2	1	120	GE3	7	4/5	i4/5	IntAnterior	3	12
f	0	19	10	17.8238	2	1	120	GE3	6	4/5	i4/5	IntAnterior	3	12
m	1	6	8	190.331	2	1	120	GE3	5	4/5	i4/5	IntAnterior	3	12
m	1	7	8	6.96584	2	1	120	GE3	7	4/5	i4/5	IntAnterior	3	12
m	1	7	9	62.1021	2	1	120	GE3	7	4/5	i4/5	IntAnterior	3	12
m	1	7	10		2	1	120	GE3	7	4/5	i4/5	IntAnterior	3	12
m	1	9	12		2	1	120	GE3	6	4/5	i4/5	IntAnterior	3	12
m	1	9	13	75.6107	2	1	120	GE3	6	4/5	i4/5	IntAnterior	3	12
f	0	14	7		3	1	210	GE4	6	4/5	i4/5	IntAnterior	3	12
m	1	17	7	107.672	3	1	210	GE4	6	4/5	i4/5	IntAnterior	3	12
m	1	17	8	19.4477	3	1	210	GE4	6	4/5	i4/5	IntAnterior	3	12
m	1	17	9	149.373	3	1	210	GE4	6	4/5	i4/5	IntAnterior	3	12
m	1	17	10	57.4775	3	1	210	GE4	6	4/5	i4/5	IntAnterior	3	12
m	1	29		53.2115	3	1	210	GE4	6		i4/5	IntAnterior	3	12
f	0	23		108.183	4	1	400	GE1	6	4/5	i4/5	IntAnterior	3	12
f	0	25	10	57.6865	4	1	400	GE1	6	4/5	i4/5	IntAnterior	3	12
f	0	1	4	143.49	1	2	45	GE2	6	4/5	i4/5	IntAnterior	3	12
f	0	2	15	125.427	1	2	45	GE2	6	4/5	i4/5	IntAnterior	3	12
f	0	7	5	21.3282	1	2	45	GE2	6	4/5	i4/5	IntAnterior	3	12
m	1	3	7	31.1748	1	2	45	GE2	6	4/5	i4/5	IntAnterior	3	12
m	1	3	8	25.6742	1	2	45	GE2	6	4/5	i4/5	IntAnterior	3	12
m	1	3	9	70.2004	1	2	45	GE2	6	4/5	i4/5	IntAnterior	3	12
m	1	5	9	49.6935	1	2	45	GE2	6	4/5	i4/5	IntAnterior	3	12
m	1	6	12	48.5925	1	2	45	GE2	7	4/5	i4/5	IntAnterior	3	12
f	0	8	9	19.698	2	2	120	GE3	7	4/5	i4/5	IntAnterior	3	12
f	0	8	10	53.2732	2	2	120	GE3	7	4/5	i4/5	IntAnterior	3	12
f	0	8	11	23.6967	2	2	120	GE3	7	4/5	i4/5	IntAnterior	3	12
f	0	10		20.8164	2	2	120	GE3	6	4/5	i4/5	IntAnterior	3	12
f	0	11		27.0384	2	2	120	GE3	7	4/5	i4/5	IntAnterior	3	12
f	0	11		26.7654	2	2	120	GE3	7	4/5	i4/5	IntAnterior	3	12
f	0	12	7	34.1156	2	2	120	GE3	5	4/5	i4/5	IntAnterior	3	12
m	1	13	10	43.1666	2	2	120	GE3	6	4/5	i4/5	IntAnterior	3	12
m	1	13	11	32.8469	2	2	120	GE3	6	4/5	i4/5	IntAnterior	3	12
m	1	19		22.28	2	2	120	GE3	6	4/5	i4/5	IntAnterior	3	12
m	1	17	12	14.3069	3	2	210	GE4	6	4/5	i4/5	IntAnterior	3	12
m	1	20		36.3793	3	2	210	GE4	6	4/5	i4/5	IntAnterior	3	12
m	1	21		25.9842	3	2	210	GE4	6	4/5	i4/5	IntAnterior	3	12
m	1	18	10	68.7877	4	2	400	GE1	7	4/5	i4/5	IntAnterior	3	12
m	1	23		63.8418	4	2	400	GE1	7	4/5	i4/5	IntAnterior	3	12
f	0	18	7	36.8348	1	3	45	GE2	7	4/5	i4/5	IntAnterior	3	12
m	1	9	3	76.2021	1	3	45	GE2	6	4/5	i4/5	IntAnterior	3	12
m	1	10	8		1	3	45	GE2	7	4/5	i4/5	IntAnterior	3	12
m	1	7		151.451	2	3	120	GE3	5	4/5	i4/5	IntAnterior	3	12
m	1	19		75.1728	2	3	120	GE3	6	4/5	i4/5	IntAnterior	3	12
f	0	16	8		3	3	210	GE4	6	4/5	i4/5	IntAnterior	3	12
f	0	20			3	3	210	GE4	6	4/5	i4/5	IntAnterior	3	12
m	1	11	4		3	3	210	GE4	6	4/5	i4/5	IntAnterior	3	12
f	0	25	8	71.9155	4	3	400	GE1	1900-01-06	4/5	i4/5	IntAnterior	3	12
m	1	12		48.6419	4	3	400	GE1	6	4/5	i4/5	IntAnterior	3	12
m	1	22		42.9067	4	3	400	GE1	6	4/5	i4/5	IntAnterior	3	12
m	1	26	17	30.9727	4	3	400	GE1	1900-01-06	4/5	i4/5	IntAnterior	3	12
m	1	26	18	68.1953	4	3	400	GE1	1900-01-06	4/5	i4/5	IntAnterior	3	12
f	0	2	17	118.705	1	4	45	GE2	7	4/5	i4/5	IntAnterior	3	12
f	0	2	18	74.8616	1	4	45	GE2	7	4/5	i4/5	IntAnterior	3	12
f	0	2	19	22.7559	1	4	45	GE2	7	4/5	i4/5	IntAnterior	3	12
f	0	2	20	117.086	1	4	45	GE2	7	4/5	i4/5	IntAnterior	3	12
f	0	4	14	24.0634	1	4	45	GE2	7	4/5	i4/5	IntAnterior	3	12
f	0	4	15	89.6517	1	4	45	GE2	7	4/5	i4/5	IntAnterior	3	12
f	0	5	7	93.6742	1	4	45	GE2	6	4/5	i4/5	IntAnterior	3	12
f	0	6	10	55.6306	1	4	45	GE2	7	4/5	i4/5	IntAnterior	3	12
f	0	6	11	32.0062	1	4	45	GE2	7	4/5	i4/5	IntAnterior	3	12
m	1	3	7	86.2055	1	4	45	GE2	7	4/5	i4/5	IntAnterior	3	12
m	1	3	8	2.85681	1	4	45	GE2	7	4/5	i4/5	IntAnterior	3	12
m	1	7	6		1	4	45	GE2	7	4/5	i4/5		#N/A	12
m	1	7	7	116.798	1	4	45	GE2	7	4/5	i4/5	IntAnterior	3	12
m	1	7	8	90.8182	1	4	45	GE2	7	4/5	i4/5	IntAnterior	3	12
m	1	8	17	59.6373	1	4	45	GE2	6	4/5	i4/5	IntAnterior	3	12
f	0	10	12	15.9156	2	4	120	GE3	6	4/5	i4/5	IntAnterior	3	12
f	0	14	7	30.5036	2	4	120	GE3	6	4/5	i4/5	IntAnterior	3	12
m	1	13	11		2	4	120	GE3	6	4/5	i4/5		#N/A	12
m	1	16	13	62.2711	2	4	120	GE3	6	4/5	i4/5	IntAnterior	3	12
f	0	19		5.19726	3	4	210	GE4	6	4/5	i4/5	IntAnterior	3	12
f	0	20	6		3	4	210	GE4	6	4/5	i4/5		#N/A	12
f	0	23	6	5.36185	3	4	210	GE4	6	4/5	i4/5	IntAnterior	3	12
f	0	23	7	64.5349	3	4	210	GE4	6	4/5	i4/5	IntAnterior	3	12
m	1	17	10	25.0702	3	4	210	GE4	6	4/5	i4/5	IntAnterior	3	12
m	1	18	5	58.3697	3	4	210	GE4	6	4/5	i4/5	IntAnterior	3	12
f	0	24	7		4	4	400	GE1	5	4/5	i4/5		#N/A	12
f	0	25	9	13.54	4	4	400	GE1	6	4/5	i4/5	IntAnterior	3	12
f	0	26	8		4	4	400	GE1	6	4/5	i4/5	IntAnterior	3	12
f	0	27	6		4	4	400	GE1	6	4/5	i4/5		#N/A	12
m	1	29	4	74.9772	4	4	400	GE1	6	4/5	i4/5	IntAnterior	3	12
m	1	30	7	92.609	4	4	400	GE1	6	4/5	i4/5	IntAnterior	3	12
m	1	1	8		3	5	210	GE4	6	4/5	i4/5	IntAnterior	3	12
f	0	9	2	7.86934	4	5	400	GE1	5	4/5	i4/5	IntAnterior	3	12
f	0	9	3	89.7481	4	5	400	GE1	5	4/5	i4/5	IntAnterior	3	12
m	1	4	5	60.1624	4	5	400	GE1	6	4/5	i4/5	IntAnterior	3	12
m	1	5	6	150.667	4	5	400	GE1	6	4/5	i4/5	IntAnterior	3	12
m	1	7	8	58.3611	4	5	400	GE1	6	4/5	i4/5	IntAnterior	3	12
f	0	3	13	59.9277	1	1	45	GE2	9	2	m2	MedAnterior	5	13
f	0	4	43	160.426	1	1	45	GE2	10	2	m2	MedAnterior	5	13
f	0	4	44	65.6566	1	1	45	GE2	10	2	m2	MedAnterior	5	13
f	0	4	45	129.766	1	1	45	GE2	10	2	m2	MedAnterior	5	13
f	0	12	23	128.827	1	1	45	GE2	12	2	m2	MedAnterior	5	13
f	0	12	24	169.218	1	1	45	GE2	12	2	m2	MedAnterior	5	13
f	0	13	12	79.974	1	1	45	GE2	12	2	m2	MedAnterior	5	13
f	0	13	13	82.1275	1	1	45	GE2	12	2	m2	MedAnterior	5	13
m	1	1	37	39.274	1	1	45	GE2	9	2	m2	MedAnterior	5	13
m	1	1	38	95.4469	1	1	45	GE2	9	2	m2	MedAnterior	5	13
m	1	1	39	68.4366	1	1	45	GE2	9	2	m2	MedAnterior	5	13
m	1	2	36	94.6632	1	1	45	GE2	11	2	m2	MedAnterior	5	13
m	1	2	37	73.4817	1	1	45	GE2	11	2	m2	MedAnterior	5	13
m	1	2	38	90.8974	1	1	45	GE2	11	2	m2	MedAnterior	5	13
m	1	5	16	72.4761	1	1	45	GE2	11	2	m2	MedAnterior	5	13
m	1	5	17	70.3482	1	1	45	GE2	11	2	m2	MedAnterior	5	13
m	1	5	18	27.43	1	1	45	GE2	11	2	m2	MedAnterior	5	13
f	0	10	5	122.393	2	1	120	GE3	11	2	m2	MedAnterior	5	13
f	0	10	6		2	1	120	GE3	11	2	m2	MedAnterior	5	13
f	0	10	7	85.9426	2	1	120	GE3	11	2	m2	MedAnterior	5	13
f	0	11	8	78.4888	2	1	120	GE3	12	2	m2	MedAnterior	5	13
f	0	11	9	88.9458	2	1	120	GE3	12	2	m2	MedAnterior	5	13
f	0	11	10	105.266	2	1	120	GE3	12	2	m2	MedAnterior	5	13
f	0	18			2	1	120	GE3	12	2	m2	MedAnterior	5	13
f	0	18		95.5659	2	1	120	GE3	12	2	m2	MedAnterior	5	13
f	0	18		81.2518	2	1	120	GE3	12	2	m2	MedAnterior	5	13
f	0	19	16	90.2656	2	1	120	GE3	11	2	m2	MedAnterior	5	13
f	0	19	17	74.4928	2	1	120	GE3	11	2	m2	MedAnterior	5	13
m	1	6	26		2	1	120	GE3	12	2	m2	MedAnterior	5	13
m	1	6	27	83.6609	2	1	120	GE3	12	2	m2	MedAnterior	5	13
m	1	7	15	52.2738	2	1	120	GE3	11	2	m2	MedAnterior	5	13
m	1	7	16	38.3277	2	1	120	GE3	11	2	m2	MedAnterior	5	13
m	1	8	8	50.7156	2	1	120	GE3	11	2	m2	MedAnterior	5	13
m	1	8	9	45.3258	2	1	120	GE3	11	2	m2	MedAnterior	5	13
m	1	9	31	47.0013	2	1	120	GE3	11	2	m2	MedAnterior	5	13
m	1	9	32	39.29	2	1	120	GE3	11	2	m2	MedAnterior	5	13
f	0	14	11	76.7646	3	1	210	GE4	12	2	m2	MedAnterior	5	13
f	0	14	12	81.2245	3	1	210	GE4	12	2	m2	MedAnterior	5	13
f	0	15	10	51.1988	3	1	210	GE4	12	2	m2	MedAnterior	5	13
f	0	15	11	71.6366	3	1	210	GE4	12	2	m2	MedAnterior	5	13
f	0	27		69.9565	3	1	210	GE4	12	2	m2	MedAnterior	5	13
f	0	27		86.6478	3	1	210	GE4	12	2	m2	MedAnterior	5	13
f	0	28	11	65.2471	3	1	210	GE4	12	2	m2	MedAnterior	5	13
f	0	28	12	73.4624	3	1	210	GE4	12	2	m2	MedAnterior	5	13
m	1	16	9	67.1761	3	1	210	GE4	11	2	m2	MedAnterior	5	13
m	1	16	10	72.3403	3	1	210	GE4	11	2	m2	MedAnterior	5	13
m	1	16	11	86.2473	3	1	210	GE4	11	2	m2	MedAnterior	5	13
m	1	17	13	173.351	3	1	210	GE4	11	2	m2	MedAnterior	5	13
m	1	17	14	66.4143	3	1	210	GE4	11	2	m2	MedAnterior	5	13
m	1	17	15	101.601	3	1	210	GE4	11	2	m2	MedAnterior	5	13
m	1	17	16	77.2729	3	1	210	GE4	11	2	m2	MedAnterior	5	13
m	1	29		78.507	3	1	210	GE4	12		m2	MedAnterior	5	13
m	1	29		61.4422	3	1	210	GE4	12		m2	MedAnterior	5	13
f	0	23		75.3438	4	1	400	GE1	12	2	m2	MedAnterior	5	13
f	0	23		79.8314	4	1	400	GE1	12	2	m2	MedAnterior	5	13
f	0	23		102.616	4	1	400	GE1	12	2	m2	MedAnterior	5	13
f	0	24	13	66.8407	4	1	400	GE1	12	2	m2	MedAnterior	5	13
f	0	24	14	51.2306	4	1	400	GE1	12	2	m2	MedAnterior	5	13
f	0	25	11	57.9147	4	1	400	GE1	12	2	m2	MedAnterior	5	13
f	0	25	12	69.5992	4	1	400	GE1	12	2	m2	MedAnterior	5	13
f	0	25	13		4	1	400	GE1	12	2	m2	MedAnterior	5	13
f	0	26	11	88.7478	4	1	400	GE1	12	2	m2	MedAnterior	5	13
f	0	26	12	58.4902	4	1	400	GE1	12	2	m2	MedAnterior	5	13
f	0	26	13	77.937	4	1	400	GE1	12	2	m2	MedAnterior	5	13
m	1	20	25	60.971	4	1	400	GE1	12	2	m2	MedAnterior	5	13
m	1	20	26	104.428	4	1	400	GE1	12	2	m2	MedAnterior	5	13
m	1	21	10	94.7724	4	1	400	GE1	12	2	m2	MedAnterior	5	13
m	1	21	11	50.0098	4	1	400	GE1	12	2	m2	MedAnterior	5	13
m	1	22	12	78.0694	4	1	400	GE1	12	2	m2	MedAnterior	5	13
m	1	22	13	122.711	4	1	400	GE1	12	2	m2	MedAnterior	5	13
m	1	22	14	78.5366	4	1	400	GE1	12	2	m2	MedAnterior	5	13
f	0	1	29	133.681	1	2	45	GE2	9	2	m2	MedAnterior	5	13
f	0	1	30	25.2864	1	2	45	GE2	9	2	m2	MedAnterior	5	13
f	0	1	31	85.231	1	2	45	GE2	9	2	m2	MedAnterior	5	13
f	0	2	16	21.1495	1	2	45	GE2	9	2	m2	MedAnterior	5	13
f	0	2	17	53.7547	1	2	45	GE2	9	2	m2	MedAnterior	5	13
f	0	2	18	49.3906	1	2	45	GE2	9	2	m2	MedAnterior	5	13
f	0	7	26	90.1557	1	2	45	GE2	10	2	m2	MedAnterior	5	13
f	0	22		22.0614	1	2	45	GE2	12	2	m2	MedAnterior	5	13
f	0	22		34.1255	1	2	45	GE2	12	2	m2	MedAnterior	5	13
m	1	3	35	46.9404	1	2	45	GE2	9	2	m2	MedAnterior	5	13
m	1	3	36	75.245	1	2	45	GE2	9	2	m2	MedAnterior	5	13
m	1	3	37	43.6436	1	2	45	GE2	9	2	m2	MedAnterior	5	13
m	1	3	38	34.1097	1	2	45	GE2	9	2	m2	MedAnterior	5	13
m	1	4	44	52.9514	1	2	45	GE2	9	2	m2	MedAnterior	5	13
m	1	4	45	37.1168	1	2	45	GE2	9	2	m2	MedAnterior	5	13
m	1	6	28	95.1335	1	2	45	GE2	11	2	m2	MedAnterior	5	13
m	1	6	29	50.7884	1	2	45	GE2	11	2	m2	MedAnterior	5	13
f	0	8	12	43.6371	2	2	120	GE3	10	2	m2	MedAnterior	5	13
f	0	8	13	42.5709	2	2	120	GE3	10	2	m2	MedAnterior	5	13
f	0	10		29.2374	2	2	120	GE3	11	2	m2	MedAnterior	5	13
f	0	10		84.5445	2	2	120	GE3	11	2	m2	MedAnterior	5	13
f	0	11		55.8347	2	2	120	GE3	11	2	m2	MedAnterior	5	13
f	0	11		24.055	2	2	120	GE3	11	2	m2	MedAnterior	5	13
f	0	11		19.7605	2	2	120	GE3	11	2	m2	MedAnterior	5	13
f	0	11		59.0412	2	2	120	GE3	11	2	m2	MedAnterior	5	13
f	0	12	33	37.9994	2	2	120	GE3	10	2	m2	MedAnterior	5	13
m	1	9	7	29.864	2	2	120	GE3	11	2	m2	MedAnterior	5	13
m	1	9	8	13.4652	2	2	120	GE3	11	2	m2	MedAnterior	5	13
m	1	13	14	50.3268	2	2	120	GE3	11	2	m2	MedAnterior	5	13
m	1	13	15	20.9151	2	2	120	GE3	11	2	m2	MedAnterior	5	13
m	1	14	19	50.1518	2	2	120	GE3	13	2	m2	MedAnterior	5	13
m	1	14	20	76.6204	2	2	120	GE3	13	2	m2	MedAnterior	5	13
m	1	14	21	44.1851	2	2	120	GE3	13	2	m2	MedAnterior	5	13
m	1	19		42.9152	2	2	120	GE3	12	2	m2	MedAnterior	5	13
m	1	19		51.9884	2	2	120	GE3	12	2	m2	MedAnterior	5	13
f	0	15	23	12.4497	3	2	210	GE4	12	2	m2	MedAnterior	5	13
f	0	15	24	82.0392	3	2	210	GE4	12	2	m2	MedAnterior	5	13
f	0	15	25	43.4881	3	2	210	GE4	12	2	m2	MedAnterior	5	13
m	1	17	33	23.4871	3	2	210	GE4	12	2	m2	MedAnterior	5	13
m	1	17	34	44.8691	3	2	210	GE4	12	2	m2	MedAnterior	5	13
m	1	20		36.6753	3	2	210	GE4	11	2	m2	MedAnterior	5	13
m	1	20		38.1564	3	2	210	GE4	11	2	m2	MedAnterior	5	13
m	1	21		16.8735	3	2	210	GE4	11	2	m2	MedAnterior	5	13
m	1	21		33.4172	3	2	210	GE4	11	2	m2	MedAnterior	5	13
f	0	16		44.7817	4	2	400	GE1	12	2	m2	MedAnterior	5	13
f	0	16		40.4501	4	2	400	GE1	12	2	m2	MedAnterior	5	13
m	1	18	27	60.2967	4	2	400	GE1	12	2	m2	MedAnterior	5	13
m	1	18	28	37.8747	4	2	400	GE1	12	2	m2	MedAnterior	5	13
m	1	23		41.2489	4	2	400	GE1	12	2	m2	MedAnterior	5	13
m	1	23		60.6298	4	2	400	GE1	12	2	m2	MedAnterior	5	13
m	1	23		56.015	4	2	400	GE1	12	2	m2	MedAnterior	5	13
f	0	15		32.3131	1	3	45	GE2	12	2	m2	MedAnterior	5	13
f	0	15		80.0627	1	3	45	GE2	12	2	m2	MedAnterior	5	13
f	0	17		57.6238	1	3	45	GE2	11	2	m2	MedAnterior	5	13
f	0	17		70.6624	1	3	45	GE2	11	2	m2	MedAnterior	5	13
f	0	18	10	45.0202	1	3	45	GE2	11	2	m2	MedAnterior	5	13
m	1	2	15	89.8242	1	3	45	GE2	12	2	m2	MedAnterior	5	13
m	1	2	16	100.717	1	3	45	GE2	12	2	m2	MedAnterior	5	13
m	1	3		57.8063	1	3	45	GE2	12	2	m2	MedAnterior	5	13
m	1	3		118.201	1	3	45	GE2	12	2	m2	MedAnterior	5	13
m	1	9	10	67.7455	1	3	45	GE2	11	2	m2	MedAnterior	5	13
m	1	9	11	53.272	1	3	45	GE2	11	2	m2	MedAnterior	5	13
m	1	10	10	54.7343	1	3	45	GE2	12	2	m2	MedAnterior	5	13
m	1	10	11	87.5778	1	3	45	GE2	12	2	m2	MedAnterior	5	13
f	0	1	9	61.5458	2	3	120	GE3	12	2	m2	MedAnterior	5	13
f	0	1	10	45.403	2	3	120	GE3	12	2	m2	MedAnterior	5	13
m	1	5		51.6642	2	3	120	GE3	12	2	m2	MedAnterior	5	13
m	1	5		54.6287	2	3	120	GE3	12	2	m2	MedAnterior	5	13
m	1	6		79.9397	2	3	120	GE3	12	2	m2	MedAnterior	5	13
m	1	6		66.391	2	3	120	GE3	12	2	m2	MedAnterior	5	13
m	1	7		47.177	2	3	120	GE3	12	2	m2	MedAnterior	5	13
m	1	7		121.961	2	3	120	GE3	12	2	m2	MedAnterior	5	13
m	1	19		57.7049	2	3	120	GE3	12	2	m2	MedAnterior	5	13
m	1	19		52.1845	2	3	120	GE3	12	2	m2	MedAnterior	5	13
m	1	23		67.4798	2	3	120	GE3	12	2	m2	MedAnterior	5	13
m	1	23		59.6742	2	3	120	GE3	12	2	m2	MedAnterior	5	13
f	0	16	12	39.3233	3	3	210	GE4	11	2	m2	MedAnterior	5	13
f	0	16	13	60.4754	3	3	210	GE4	11	2	m2	MedAnterior	5	13
f	0	20		40.2613	3	3	210	GE4	11	2	m2	MedAnterior	5	13
f	0	20		65.1834	3	3	210	GE4	11	2	m2	MedAnterior	5	13
f	0	21	12	148.354	3	3	210	GE4	11	2	m2	MedAnterior	5	13
f	0	21	13	75.7496	3	3	210	GE4	11	2	m2	MedAnterior	5	13
m	1	4		53.1817	3	3	210	GE4	11	2	m2	MedAnterior	4	13
m	1	4		60.2433	3	3	210	GE4	11	2	m2	MedAnterior	4	13
m	1	8		51.1972	3	3	210	GE4	12	2	m2	MedAnterior	5	13
m	1	8		87.3781	3	3	210	GE4	12	2	m2	MedAnterior	5	13
m	1	11	21	80.0279	3	3	210	GE4	12	2	m2	MedAnterior	5	13
m	1	11	22	81.0543	3	3	210	GE4	12	2	m2	MedAnterior	5	13
f	0	13		47.8507	4	3	400	GE1	12	2	m2	MedAnterior	5	13
f	0	13		73.0467	4	3	400	GE1	12	2	m2	MedAnterior	5	13
f	0	14		56.996	4	3	400	GE1	11	2	m2	MedAnterior	5	13
f	0	14		98.3824	4	3	400	GE1	11	2	m2	MedAnterior	5	13
f	0	25	15	85.5776	4	3	400	GE1	12	2	m2	MedAnterior	5	13
f	0	25	16	27.4336	4	3	400	GE1	12	2	m2	MedAnterior	5	13
m	1	12		62.7126	4	3	400	GE1	12	2	m2	MedAnterior	5	13
m	1	12		78.0672	4	3	400	GE1	12	2	m2	MedAnterior	5	13
m	1	22		77.9063	4	3	400	GE1	12	2	m2	MedAnterior	5	13
m	1	22		43.9645	4	3	400	GE1	12	2	m2	MedAnterior	5	13
m	1	24		52.6169	4	3	400	GE1	11	2	m2	MedAnterior	5	13
m	1	24		66.6314	4	3	400	GE1	11	2	m2	MedAnterior	5	13
m	1	26	19	69.3106	4	3	400	GE1	12	2	m2	MedAnterior	5	13
m	1	26	20	51.0874	4	3	400	GE1	12	2	m2	MedAnterior	5	13
f	0	2	50	30.5264	1	4	45	GE2	10	2	m2	MedAnterior	5	13
f	0	2	51	112.576	1	4	45	GE2	10	2	m2	MedAnterior	5	13
f	0	2	52	81.4083	1	4	45	GE2	10	2	m2	MedAnterior	5	13
f	0	4	33	88.0324	1	4	45	GE2	10	2	m2	MedAnterior	5	13
f	0	4	34	86.1118	1	4	45	GE2	10	2	m2	MedAnterior	5	13
f	0	5	9	51.217	1	4	45	GE2	10	2	m2	MedAnterior	5	13
f	0	5	10	51.8553	1	4	45	GE2	10	2	m2	MedAnterior	5	13
f	0	6	28	50.259	1	4	45	GE2	13	2	m2	MedAnterior	5	13
m	1	1	44	68.1534	1	4	45	GE2	10	2	m2	MedAnterior	5	13
m	1	1	45	58.7115	1	4	45	GE2	10	2	m2	MedAnterior	5	13
m	1	1	46	72.7204	1	4	45	GE2	10	2	m2	MedAnterior	5	13
m	1	1	47	56.9625	1	4	45	GE2	10	2	m2	MedAnterior	5	13
m	1	3	43	94.6655	1	4	45	GE2	11	2	m2	MedAnterior	5	13
m	1	3	44	116.486	1	4	45	GE2	11	2	m2	MedAnterior	5	13
m	1	7	9	58.6557	1	4	45	GE2	11	2	m2	MedAnterior	5	13
m	1	7	10	51.1538	1	4	45	GE2	11	2	m2	MedAnterior	5	13
m	1	8	34	70.452	1	4	45	GE2	11	2	m2	MedAnterior	5	13
f	0	9	5	25.888	2	4	120	GE3	10	2	m2	MedAnterior	5	13
f	0	9	6	38.4575	2	4	120	GE3	10	2	m2	MedAnterior	5	13
f	0	10	13	47.3183	2	4	120	GE3	10	2	m2	MedAnterior	5	13
f	0	10	14	46.8322	2	4	120	GE3	10	2	m2	MedAnterior	5	13
f	0	14	13	126.879	2	4	120	GE3	12	2	m2	MedAnterior	5	13
f	0	14	14	95.8982	2	4	120	GE3	12	2	m2	MedAnterior	5	13
f	0	15	21	85.7806	2	4	120	GE3	12	2	m2	MedAnterior	5	13
f	0	15	22	89.999	2	4	120	GE3	12	2	m2	MedAnterior	5	13
m	1	11	27	98.5888	2	4	120	GE3	12	2	m2	MedAnterior	5	13
m	1	11	28	62.7824	2	4	120	GE3	12	2	m2	MedAnterior	5	13
m	1	12	29	41.4309	2	4	120	GE3	11	2	m2	MedAnterior	5	13
m	1	12	30	65.2985	2	4	120	GE3	11	2	m2	MedAnterior	5	13
m	1	12	31	42.9226	2	4	120	GE3	11	2	m2	MedAnterior	5	13
m	1	13	26	69.1511	2	4	120	GE3	12	2	m2	MedAnterior	5	13
m	1	13	27	80.8842	2	4	120	GE3	12	2	m2	MedAnterior	5	13
m	1	16	14	59.4302	2	4	120	GE3	11	2	m2	MedAnterior	5	13
m	1	16	15	65.6933	2	4	120	GE3	11	2	m2	MedAnterior	5	13
f	0	19		119.197	3	4	210	GE4	11	2	m2	MedAnterior	5	13
f	0	19		111.598	3	4	210	GE4	11	2	m2	MedAnterior	5	13
f	0	19		121.211	3	4	210	GE4	11	2	m2	MedAnterior	5	13
f	0	20	30	93.411	3	4	210	GE4	12	2	m2	MedAnterior	5	13
f	0	20	31	93.218	3	4	210	GE4	12	2	m2	MedAnterior	5	13
f	0	20	32	37.198	3	4	210	GE4	12	2	m2	MedAnterior	5	13
f	0	20	33	85.4729	3	4	210	GE4	12	2	m2	MedAnterior	5	13
f	0	20	34	109.439	3	4	210	GE4	12	2	m2	MedAnterior	5	13
f	0	21	4	59.0996	3	4	210	GE4	12	2	m2	MedAnterior	5	13
f	0	21	5	79.8312	3	4	210	GE4	12	2	m2	MedAnterior	5	13
f	0	23	8	28.9938	3	4	210	GE4	11	2	m2	MedAnterior	5	13
f	0	23	9	47.022	3	4	210	GE4	11	2	m2	MedAnterior	5	13
f	0	23	10	87.4056	3	4	210	GE4	11	2	m2	MedAnterior	5	13
m	1	17	11	55.7909	3	4	210	GE4	11	2	m2	MedAnterior	5	13
m	1	17	12	75.7964	3	4	210	GE4	11	2	m2	MedAnterior	5	13
m	1	18	9	71.2869	3	4	210	GE4	12	2	m2	MedAnterior	5	13
m	1	18	10	77.1106	3	4	210	GE4	12	2	m2	MedAnterior	5	13
m	1	18	11	63.6249	3	4	210	GE4	12	2	m2	MedAnterior	5	13
m	1	22	21	118.215	3	4	210	GE4	12	2	m2	MedAnterior	5	13
m	1	22	22	47.3622	3	4	210	GE4	12	2	m2	MedAnterior	5	13
m	1	22	23	81.0058	3	4	210	GE4	12	2	m2	MedAnterior	5	13
f	0	24	8	25.871	4	4	400	GE1	12	2	m2	MedAnterior	5	13
f	0	24	9	79.5986	4	4	400	GE1	12	2	m2	MedAnterior	5	13
f	0	25	10	69.4711	4	4	400	GE1	12	2	m2	MedAnterior	5	13
f	0	25	11	39.8935	4	4	400	GE1	12	2	m2	MedAnterior	5	13
f	0	26	9	68.7971	4	4	400	GE1	12	2	m2	MedAnterior	5	13
f	0	26	10	42.4333	4	4	400	GE1	12	2	m2	MedAnterior	5	13
f	0	27	10	75.6405	4	4	400	GE1	12	2	m2	MedAnterior	5	13
f	0	27	11	69.2115	4	4	400	GE1	12	2	m2	MedAnterior	5	13
m	1	28	11	53.2986	4	4	400	GE1	12	2	m2	MedAnterior	5	13
m	1	28	12	99.6269	4	4	400	GE1	12	2	m2	MedAnterior	5	13
m	1	29	9	93.4667	4	4	400	GE1	12	2	m2	MedAnterior	5	13
m	1	29	10	75.8916	4	4	400	GE1	12	2	m2	MedAnterior	5	13
m	1	30	23	92.5617	4	4	400	GE1	12	2	m2	MedAnterior	5	13
m	1	30	24	67.3515	4	4	400	GE1	12	2	m2	MedAnterior	5	13
m	1	1	9	23.9517	3	5	210	GE4	11	2	m2	MedAnterior	5	13
m	1	1	10	88.612	3	5	210	GE4	11	2	m2	MedAnterior	5	13
m	1	1	11	51.9744	3	5	210	GE4	11	2	m2	MedAnterior	5	13
m	1	1	12	54.5237	3	5	210	GE4	11	2	m2	MedAnterior	5	13
m	1	1	13	78.1203	3	5	210	GE4	11	2	m2	MedAnterior	5	13
f	0	6	12	35.6685	4	5	400	GE1	12	2	m2	MedAnterior	5	13
f	0	6	13	56.1242	4	5	400	GE1	12	2	m2	MedAnterior	5	13
f	0	8	10	37.9917	4	5	400	GE1	11	2	m2	MedAnterior	5	13
f	0	8	11	103.719	4	5	400	GE1	11	2	m2	MedAnterior	5	13
f	0	9	4	78.2119	4	5	400	GE1	12	2	m2	MedAnterior	5	13
f	0	9	5	69.1342	4	5	400	GE1	12	2	m2	MedAnterior	5	13
m	1	2	6	45.4761	4	5	400	GE1	11	2	m2	MedAnterior	5	13
m	1	2	7	60.2537	4	5	400	GE1	11	2	m2	MedAnterior	5	13
m	1	2	8	50.1675	4	5	400	GE1	11	2	m2	MedAnterior	5	13
m	1	3	6	59.7981	4	5	400	GE1	12	2	m2	MedAnterior	5	13
m	1	3	7	42.0883	4	5	400	GE1	12	2	m2	MedAnterior	5	13
m	1	4	25	59.2416	4	5	400	GE1	12	2	m2	MedAnterior	5	13
m	1	4	26	94.9168	4	5	400	GE1	12	2	m2	MedAnterior	5	13
m	1	4	27	74.9571	4	5	400	GE1	12	2	m2	MedAnterior	5	13
m	1	5	27	77.2481	4	5	400	GE1	12	2	m2	MedAnterior	5	13
m	1	5	28	58.7415	4	5	400	GE1	12	2	m2	MedAnterior	5	13
m	1	5	29	75.8133	4	5	400	GE1	12	2	m2	MedAnterior	5	13
m	1	5	30	70.2434	4	5	400	GE1	12	2	m2	MedAnterior	5	13
m	1	7	14	100.259	4	5	400	GE1	12	2	m2	MedAnterior	5	13
m	1	7	15	81.2419	4	5	400	GE1	12	2	m2	MedAnterior	5	13
m	1	10	8	96.444	4	5	400	GE1	12	2	m2	MedAnterior	5	13
m	1	10	9	51.9135	4	5	400	GE1	12	2	m2	MedAnterior	5	13
f	0	3	14	86.469	1	1	45	GE2	9	3	m3	MedAnterior	5	14
f	0	3	15	118.991	1	1	45	GE2	9	3	m3	MedAnterior	5	14
f	0	4	38	39.8284	1	1	45	GE2	10	3	m3	MedAnterior	5	14
f	0	4	39	70.2203	1	1	45	GE2	10	3	m3	MedAnterior	5	14
f	0	4	40	179.774	1	1	45	GE2	10	3	m3	MedAnterior	5	14
f	0	4	41	60.302	1	1	45	GE2	10	3	m3	MedAnterior	5	14
f	0	4	42	105.093	1	1	45	GE2	10	3	m3	MedAnterior	5	14
f	0	12	20	97.8861	1	1	45	GE2	12	3	m3	MedAnterior	5	14
f	0	12	21	152.793	1	1	45	GE2	12	3	m3	MedAnterior	5	14
f	0	12	22	40.9671	1	1	45	GE2	12	3	m3	MedAnterior	5	14
f	0	13	14	81.7598	1	1	45	GE2	12	3	m3	MedAnterior	5	14
m	1	1	35	87.6924	1	1	45	GE2	9	3	m3	MedAnterior	5	14
m	1	1	36	34.7429	1	1	45	GE2	9	3	m3	MedAnterior	5	14
m	1	2	34	117.49	1	1	45	GE2	11	3	m3	MedAnterior	5	14
m	1	2	35	54.9057	1	1	45	GE2	11	3	m3	MedAnterior	5	14
m	1	5	19	67.1288	1	1	45	GE2	11	3	m3	MedAnterior	5	14
m	1	5	20	74.213	1	1	45	GE2	11	3	m3	MedAnterior	5	14
f	0	10	8		2	1	120	GE3	11	3	m3	MedAnterior	5	14
f	0	10	9	93.67	2	1	120	GE3	11	3	m3	MedAnterior	5	14
f	0	10	10	88.6078	2	1	120	GE3	11	3	m3	MedAnterior	5	14
f	0	11	11		2	1	120	GE3	12	3	m3	MedAnterior	5	14
f	0	11	12	183.662	2	1	120	GE3	12	3	m3	MedAnterior	5	14
f	0	11	13	201.077	2	1	120	GE3	12	3	m3	MedAnterior	5	14
f	0	18		114.252	2	1	120	GE3	12	3	m3	MedAnterior	5	14
f	0	18		149.894	2	1	120	GE3	12	3	m3	MedAnterior	5	14
f	0	18		68.1201	2	1	120	GE3	12	3	m3	MedAnterior	5	14
f	0	19	18	85.3012	2	1	120	GE3	11	3	m3	MedAnterior	5	14
f	0	19	19	97.3065	2	1	120	GE3	11	3	m3	MedAnterior	5	14
f	0	19	20	100.536	2	1	120	GE3	11	3	m3	MedAnterior	5	14
m	1	6	23	68.6385	2	1	120	GE3	12	3	m3	MedAnterior	5	14
m	1	6	24		2	1	120	GE3	12	3	m3	MedAnterior	5	14
m	1	6	25	70.5603	2	1	120	GE3	12	3	m3	MedAnterior	5	14
m	1	7	17	66.1789	2	1	120	GE3	11	3	m3	MedAnterior	5	14
m	1	7	18	33.5516	2	1	120	GE3	11	3	m3	MedAnterior	5	14
m	1	7	19	90.1871	2	1	120	GE3	11	3	m3	MedAnterior	5	14
m	1	8	10	42.2671	2	1	120	GE3	11	3	m3	MedAnterior	5	14
m	1	8	11	53.0179	2	1	120	GE3	11	3	m3	MedAnterior	5	14
m	1	8	12	79.0943	2	1	120	GE3	11	3	m3	MedAnterior	5	14
m	1	8	13		2	1	120	GE3	11	3	m3	MedAnterior	5	14
m	1	9	28	78.8049	2	1	120	GE3	11	3	m3	MedAnterior	5	14
m	1	9	29	110.289	2	1	120	GE3	11	3	m3	MedAnterior	5	14
m	1	9	30	58.6065	2	1	120	GE3	11	3	m3	MedAnterior	5	14
f	0	14	13	65.1105	3	1	210	GE4	12	3	m3	MedAnterior	5	14
f	0	14	14	86.3881	3	1	210	GE4	12	3	m3	MedAnterior	5	14
f	0	15	12	109.904	3	1	210	GE4	12	3	m3	MedAnterior	5	14
f	0	15	13	110.963	3	1	210	GE4	12	3	m3	MedAnterior	5	14
f	0	15	14	105.917	3	1	210	GE4	12	3	m3	MedAnterior	5	14
f	0	27		74.8886	3	1	210	GE4	12	3	m3	MedAnterior	5	14
f	0	27		96.8006	3	1	210	GE4	12	3	m3	MedAnterior	5	14
f	0	28	13	39.7585	3	1	210	GE4	12	3	m3	MedAnterior	5	14
f	0	28	14	95.5131	3	1	210	GE4	12	3	m3	MedAnterior	5	14
m	1	16	12	87.0639	3	1	210	GE4	11	3	m3	MedAnterior	5	14
m	1	16	13	120.022	3	1	210	GE4	11	3	m3	MedAnterior	5	14
m	1	16	14	121.15	3	1	210	GE4	11	3	m3	MedAnterior	5	14
m	1	17	17	69.2923	3	1	210	GE4	11	3	m3	MedAnterior	5	14
m	1	17	18	129.134	3	1	210	GE4	11	3	m3	MedAnterior	5	14
m	1	17	19		3	1	210	GE4	11	3	m3	MedAnterior	5	14
m	1	29		55.7777	3	1	210	GE4	12		m3	MedAnterior	5	14
m	1	29		79.4287	3	1	210	GE4	12		m3	MedAnterior	5	14
f	0	23		61.9648	4	1	400	GE1	12	3	m3	MedAnterior	5	14
f	0	23		99.0267	4	1	400	GE1	12	3	m3	MedAnterior	5	14
f	0	23		70.2167	4	1	400	GE1	12	3	m3	MedAnterior	5	14
f	0	24	15	79.6851	4	1	400	GE1	12	3	m3	MedAnterior	5	14
f	0	24	16	47.7107	4	1	400	GE1	12	3	m3	MedAnterior	5	14
f	0	25	14	64.4639	4	1	400	GE1	12	3	m3	MedAnterior	5	14
f	0	25	15	111.58	4	1	400	GE1	12	3	m3	MedAnterior	5	14
f	0	25	16	80.5474	4	1	400	GE1	12	3	m3	MedAnterior	5	14
f	0	26	14	50.8972	4	1	400	GE1	12	3	m3	MedAnterior	5	14
f	0	26	15	83.3571	4	1	400	GE1	12	3	m3	MedAnterior	5	14
f	0	26	16	40.0719	4	1	400	GE1	12	3	m3	MedAnterior	5	14
m	1	20	22	104.366	4	1	400	GE1	12	3	m3	MedAnterior	5	14
m	1	20	23	31.094	4	1	400	GE1	12	3	m3	MedAnterior	5	14
m	1	20	24	116.963	4	1	400	GE1	12	3	m3	MedAnterior	5	14
m	1	21	12	135.664	4	1	400	GE1	12	3	m3	MedAnterior	5	14
m	1	21	13	126.856	4	1	400	GE1	12	3	m3	MedAnterior	5	14
m	1	22	15	69.1066	4	1	400	GE1	12	3	m3	MedAnterior	5	14
m	1	22	16	195.015	4	1	400	GE1	12	3	m3	MedAnterior	5	14
f	0	1	26	60.9485	1	2	45	GE2	9	3	m3	MedAnterior	5	14
f	0	1	27	61.8402	1	2	45	GE2	9	3	m3	MedAnterior	5	14
f	0	1	28	34.5215	1	2	45	GE2	9	3	m3	MedAnterior	5	14
f	0	2	19	34.5144	1	2	45	GE2	9	3	m3	MedAnterior	5	14
f	0	2	20	45.6335	1	2	45	GE2	9	3	m3	MedAnterior	5	14
f	0	2	21	40.7152	1	2	45	GE2	9	3	m3	MedAnterior	5	14
f	0	7	23	24.7422	1	2	45	GE2	10	3	m3	MedAnterior	5	14
f	0	7	24	63.1886	1	2	45	GE2	10	3	m3	MedAnterior	5	14
f	0	7	25	58.1519	1	2	45	GE2	10	3	m3	MedAnterior	5	14
f	0	22		84.7458	1	2	45	GE2	12	3	m3	MedAnterior	5	14
f	0	22		78.2957	1	2	45	GE2	12	3	m3	MedAnterior	5	14
m	1	3	31	43.2895	1	2	45	GE2	9	3	m3	MedAnterior	5	14
m	1	3	32	39.2492	1	2	45	GE2	9	3	m3	MedAnterior	5	14
m	1	3	33	22.1305	1	2	45	GE2	9	3	m3	MedAnterior	5	14
m	1	3	34	41.8466	1	2	45	GE2	9	3	m3	MedAnterior	5	14
m	1	4	40	68.8464	1	2	45	GE2	9	3	m3	MedAnterior	5	14
m	1	4	41	45.4245	1	2	45	GE2	9	3	m3	MedAnterior	5	14
m	1	4	42	43.0726	1	2	45	GE2	9	3	m3	MedAnterior	5	14
m	1	4	43	49.4302	1	2	45	GE2	9	3	m3	MedAnterior	5	14
m	1	5	28	72.3477	1	2	45	GE2	10	3	m3	MedAnterior	5	14
m	1	5	29	49.9756	1	2	45	GE2	10	3	m3	MedAnterior	5	14
m	1	5	30	33.9787	1	2	45	GE2	10	3	m3	MedAnterior	5	14
m	1	5	31	77.2049	1	2	45	GE2	10	3	m3	MedAnterior	5	14
m	1	6	27	51.4073	1	2	45	GE2	11	3	m3	MedAnterior	5	14
f	0	8	14	20.9688	2	2	120	GE3	10	3	m3	MedAnterior	5	14
f	0	8	15	43.5487	2	2	120	GE3	10	3	m3	MedAnterior	5	14
f	0	8	16	35.3872	2	2	120	GE3	10	3	m3	MedAnterior	5	14
f	0	10		35.2792	2	2	120	GE3	11	3	m3	MedAnterior	5	14
f	0	10		51.2844	2	2	120	GE3	11	3	m3	MedAnterior	5	14
f	0	10		99.5207	2	2	120	GE3	11	3	m3	MedAnterior	5	14
f	0	11		42.421	2	2	120	GE3	11	3	m3	MedAnterior	5	14
f	0	11		45.5681	2	2	120	GE3	11	3	m3	MedAnterior	5	14
f	0	12	29	51.5783	2	2	120	GE3	10	3	m3	MedAnterior	5	14
f	0	12	30	65.0473	2	2	120	GE3	10	3	m3	MedAnterior	5	14
f	0	12	31	117.991	2	2	120	GE3	10	3	m3	MedAnterior	5	14
f	0	12	32	87.4962	2	2	120	GE3	10	3	m3	MedAnterior	5	14
m	1	9	9	100.944	2	2	120	GE3	11	3	m3	MedAnterior	5	14
m	1	9	10	49.986	2	2	120	GE3	11	3	m3	MedAnterior	5	14
m	1	9	11	14.4819	2	2	120	GE3	11	3	m3	MedAnterior	5	14
m	1	13	16	57.3342	2	2	120	GE3	11	3	m3	MedAnterior	5	14
m	1	13	17	43.1452	2	2	120	GE3	11	3	m3	MedAnterior	5	14
m	1	14	22	51.4515	2	2	120	GE3	13	3	m3	MedAnterior	5	14
m	1	14	23	45.99	2	2	120	GE3	13	3	m3	MedAnterior	5	14
m	1	19		49.2657	2	2	120	GE3	12	3	m3	MedAnterior	5	14
m	1	19		36.2379	2	2	120	GE3	12	3	m3	MedAnterior	5	14
m	1	19		41.3783	2	2	120	GE3	12	3	m3	MedAnterior	5	14
f	0	15	20	34.8243	3	2	210	GE4	12	3	m3	MedAnterior	5	14
f	0	15	21	39.3505	3	2	210	GE4	12	3	m3	MedAnterior	5	14
f	0	15	22	28.2877	3	2	210	GE4	12	3	m3	MedAnterior	5	14
m	1	17	30	60.8722	3	2	210	GE4	12	3	m3	MedAnterior	5	14
m	1	17	31	18.7648	3	2	210	GE4	12	3	m3	MedAnterior	5	14
m	1	17	32	10.2774	3	2	210	GE4	12	3	m3	MedAnterior	5	14
m	1	20		11.045	3	2	210	GE4	11	3	m3	MedAnterior	5	14
m	1	20		54.2047	3	2	210	GE4	11	3	m3	MedAnterior	5	14
m	1	21		29.888	3	2	210	GE4	11	3	m3	MedAnterior	5	14
m	1	21		32.7813	3	2	210	GE4	11	3	m3	MedAnterior	5	14
m	1	21		43.5877	3	2	210	GE4	11	3	m3	MedAnterior	5	14
f	0	16		14.2727	4	2	400	GE1	12	3	m3	MedAnterior	5	14
f	0	16		52.187	4	2	400	GE1	12	3	m3	MedAnterior	5	14
f	0	16		48.2646	4	2	400	GE1	12	3	m3	MedAnterior	5	14
m	1	18	24	13.1931	4	2	400	GE1	12	3	m3	MedAnterior	5	14
m	1	18	25	37.8929	4	2	400	GE1	12	3	m3	MedAnterior	5	14
m	1	18	26	28.612	4	2	400	GE1	12	3	m3	MedAnterior	5	14
m	1	23		41.0876	4	2	400	GE1	12	3	m3	MedAnterior	5	14
m	1	23		24.9756	4	2	400	GE1	12	3	m3	MedAnterior	5	14
m	1	23		36.7586	4	2	400	GE1	12	3	m3	MedAnterior	5	14
f	0	15		44.1378	1	3	45	GE2	12	3	m3	MedAnterior	5	14
f	0	15		74.6444	1	3	45	GE2	12	3	m3	MedAnterior	5	14
f	0	17		96.2757	1	3	45	GE2	11	3	m3	MedAnterior	5	14
f	0	17		74.6962	1	3	45	GE2	11	3	m3	MedAnterior	5	14
f	0	18	11		1	3	45	GE2	11	3	m3	MedAnterior	5	14
f	0	18	12	119.522	1	3	45	GE2	11	3	m3	MedAnterior	5	14
m	1	2	13	99.5987	1	3	45	GE2	12	3	m3	MedAnterior	5	14
m	1	2	14	145.318	1	3	45	GE2	12	3	m3	MedAnterior	5	14
m	1	3			1	3	45	GE2	12	3	m3	MedAnterior	5	14
m	1	3		178.145	1	3	45	GE2	12	3	m3	MedAnterior	5	14
m	1	3			1	3	45	GE2	12	3	m3		#N/A	14
m	1	9	12	72.1202	1	3	45	GE2	11	3	m3	MedAnterior	5	14
m	1	9	13	78.8855	1	3	45	GE2	11	3	m3	MedAnterior	5	14
m	1	10	12	126.988	1	3	45	GE2	12	3	m3	MedAnterior	5	14
m	1	10	13	95.4213	1	3	45	GE2	12	3	m3	MedAnterior	5	14
f	0	1	11	47.6686	2	3	120	GE3	12	3	m3	MedAnterior	5	14
f	0	1	12	75.3289	2	3	120	GE3	12	3	m3	MedAnterior	5	14
f	0	1	13	112.237	2	3	120	GE3	12	3	m3	MedAnterior	5	14
m	1	5		40.1039	2	3	120	GE3	12	3	m3	MedAnterior	5	14
m	1	5		126.539	2	3	120	GE3	12	3	m3	MedAnterior	5	14
m	1	5		101.331	2	3	120	GE3	12	3	m3	MedAnterior	5	14
m	1	6		76.2427	2	3	120	GE3	12	3	m3	MedAnterior	5	14
m	1	6		61.4109	2	3	120	GE3	12	3	m3	MedAnterior	5	14
m	1	6		54.0406	2	3	120	GE3	12	3	m3	MedAnterior	5	14
m	1	7		114.842	2	3	120	GE3	12	3	m3	MedAnterior	5	14
m	1	7		84.95	2	3	120	GE3	12	3	m3	MedAnterior	5	14
m	1	19		86.6927	2	3	120	GE3	12	3	m3	MedAnterior	5	14
m	1	19		91.6806	2	3	120	GE3	12	3	m3	MedAnterior	5	14
m	1	19		75.0163	2	3	120	GE3	12	3	m3	MedAnterior	5	14
m	1	23		49.4319	2	3	120	GE3	12	3	m3	MedAnterior	5	14
m	1	23		57.6788	2	3	120	GE3	12	3	m3	MedAnterior	5	14
m	1	23		55.8642	2	3	120	GE3	12	3	m3	MedAnterior	5	14
f	0	16	14	61.5414	3	3	210	GE4	11	3	m3	MedAnterior	5	14
f	0	16	15	90.9499	3	3	210	GE4	11	3	m3	MedAnterior	5	14
f	0	16	16	69.4748	3	3	210	GE4	11	3	m3	MedAnterior	5	14
f	0	20		53.9137	3	3	210	GE4	11	3	m3	MedAnterior	5	14
f	0	21	14	62.01	3	3	210	GE4	11	3	m3	MedAnterior	5	14
f	0	21	15	196.507	3	3	210	GE4	11	3	m3	MedAnterior	5	14
m	1	4			3	3	210	GE4	11	3	m3	MedAnterior	5	14
m	1	4		115.877	3	3	210	GE4	11	3	m3	MedAnterior	5	14
m	1	8		60.163	3	3	210	GE4	12	3	m3	MedAnterior	5	14
m	1	8		62.2385	3	3	210	GE4	12	3	m3	MedAnterior	5	14
m	1	11	19	74.8502	3	3	210	GE4	12	3	m3	MedAnterior	5	14
m	1	11	20	66.7362	3	3	210	GE4	12	3	m3	MedAnterior	5	14
f	0	13		46.5506	4	3	400	GE1	12	3	m3	MedAnterior	5	14
f	0	13		191.464	4	3	400	GE1	12	3	m3	MedAnterior	5	14
f	0	13		48.8878	4	3	400	GE1	12	3	m3	MedAnterior	5	14
f	0	14		82.4383	4	3	400	GE1	11	3	m3	MedAnterior	5	14
f	0	14		101.483	4	3	400	GE1	11	3	m3	MedAnterior	5	14
f	0	25	17	50.7152	4	3	400	GE1	12	3	m3	MedAnterior	5	14
f	0	25	18	55.9424	4	3	400	GE1	12	3	m3	MedAnterior	5	14
f	0	25	19	61.6167	4	3	400	GE1	12	3	m3	MedAnterior	5	14
m	1	12		99.1421	4	3	400	GE1	12	3	m3	MedAnterior	5	14
m	1	12		38.9477	4	3	400	GE1	12	3	m3	MedAnterior	5	14
m	1	22		33.7908	4	3	400	GE1	12	3	m3	MedAnterior	5	14
m	1	22		66.3441	4	3	400	GE1	12	3	m3	MedAnterior	5	14
m	1	22		91.6576	4	3	400	GE1	12	3	m3	MedAnterior	5	14
m	1	24		65.7027	4	3	400	GE1	11	3	m3	MedAnterior	5	14
m	1	24		62.9142	4	3	400	GE1	11	3	m3	MedAnterior	5	14
m	1	24		67.8479	4	3	400	GE1	11	3	m3	MedAnterior	5	14
m	1	26	21	60.0738	4	3	400	GE1	12	3	m3	MedAnterior	5	14
m	1	26	22	62.8049	4	3	400	GE1	12	3	m3	MedAnterior	5	14
m	1	26	23	90.8823	4	3	400	GE1	12	3	m3	MedAnterior	5	14
f	0	2	46	105.803	1	4	45	GE2	10	3	m3	MedAnterior	5	14
f	0	2	47	103.84	1	4	45	GE2	10	3	m3	MedAnterior	5	14
f	0	2	48		1	4	45	GE2	10	3	m3		#N/A	14
f	0	2	49	73.4876	1	4	45	GE2	10	3	m3	MedAnterior	5	14
f	0	4	31	73.6034	1	4	45	GE2	10	3	m3	MedAnterior	5	14
f	0	4	32	125.629	1	4	45	GE2	10	3	m3	MedAnterior	5	14
f	0	5	11	62.0504	1	4	45	GE2	10	3	m3	MedAnterior	5	14
f	0	5	12		1	4	45	GE2	10	3	m3		#N/A	14
f	0	6	27		1	4	45	GE2	13	3	m3		#N/A	14
m	1	1	39	75.998	1	4	45	GE2	10	3	m3	MedAnterior	5	14
m	1	1	40	75.1173	1	4	45	GE2	10	3	m3	MedAnterior	5	14
m	1	1	41	124.283	1	4	45	GE2	10	3	m3	MedAnterior	5	14
m	1	1	42	42.7833	1	4	45	GE2	10	3	m3	MedAnterior	5	14
m	1	1	43	44.8546	1	4	45	GE2	10	3	m3	MedAnterior	5	14
m	1	3	37	83.3961	1	4	45	GE2	11	3	m3	MedAnterior	5	14
m	1	3	38	83.8064	1	4	45	GE2	11	3	m3	MedAnterior	5	14
m	1	3	39	102.352	1	4	45	GE2	11	3	m3	MedAnterior	5	14
m	1	3	40	112.916	1	4	45	GE2	11	3	m3	MedAnterior	5	14
m	1	3	41	46.1191	1	4	45	GE2	11	3	m3	MedAnterior	5	14
m	1	3	42	98.3937	1	4	45	GE2	11	3	m3	MedAnterior	5	14
m	1	7	11	88.0685	1	4	45	GE2	11	3	m3	MedAnterior	5	14
m	1	7	12	136.024	1	4	45	GE2	11	3	m3	MedAnterior	5	14
m	1	7	13	55.3309	1	4	45	GE2	11	3	m3	MedAnterior	5	14
m	1	8	32	33.3072	1	4	45	GE2	11	3	m3	MedAnterior	5	14
m	1	8	33	89.588	1	4	45	GE2	11	3	m3	MedAnterior	5	14
f	0	9	7	41.2711	2	4	120	GE3	10	3	m3	MedAnterior	5	14
f	0	10	15	97.4679	2	4	120	GE3	10	3	m3	MedAnterior	5	14
f	0	10	16	80.7356	2	4	120	GE3	10	3	m3	MedAnterior	5	14
f	0	10	17	58.3099	2	4	120	GE3	10	3	m3	MedAnterior	5	14
f	0	14	15	39.6086	2	4	120	GE3	12	3	m3	MedAnterior	5	14
f	0	14	16	7.43218	2	4	120	GE3	12	3	m3	MedAnterior	5	14
f	0	14	17	98.8549	2	4	120	GE3	12	3	m3	MedAnterior	5	14
f	0	15	18	140.574	2	4	120	GE3	12	3	m3	MedAnterior	5	14
f	0	15	19	45.7457	2	4	120	GE3	12	3	m3	MedAnterior	5	14
m	1	11	25	71.7382	2	4	120	GE3	12	3	m3	MedAnterior	5	14
m	1	11	26	107.591	2	4	120	GE3	12	3	m3	MedAnterior	5	14
m	1	12	25	48.8865	2	4	120	GE3	11	3	m3	MedAnterior	5	14
m	1	12	26	37.4047	2	4	120	GE3	11	3	m3	MedAnterior	5	14
m	1	12	27	68.4413	2	4	120	GE3	11	3	m3	MedAnterior	5	14
m	1	12	28	48.5149	2	4	120	GE3	11	3	m3	MedAnterior	5	14
m	1	13	24	85.7837	2	4	120	GE3	12	3	m3	MedAnterior	5	14
m	1	13	25	68.2552	2	4	120	GE3	12	3	m3	MedAnterior	5	14
m	1	16	16	89.5901	2	4	120	GE3	11	3	m3	MedAnterior	5	14
m	1	16	17	63.806	2	4	120	GE3	11	3	m3	MedAnterior	5	14
m	1	16	18	92.8632	2	4	120	GE3	11	3	m3	MedAnterior	5	14
f	0	19		64.0476	3	4	210	GE4	11	3	m3	MedAnterior	5	14
f	0	19		86.6929	3	4	210	GE4	11	3	m3	MedAnterior	5	14
f	0	19		65.9604	3	4	210	GE4	11	3	m3	MedAnterior	5	14
f	0	19		217.493	3	4	210	GE4	11	3	m3	MedAnterior	5	14
f	0	20	27	43.8009	3	4	210	GE4	12	3	m3	MedAnterior	5	14
f	0	20	28	133.998	3	4	210	GE4	12	3	m3	MedAnterior	5	14
f	0	20	29	85.0093	3	4	210	GE4	12	3	m3	MedAnterior	5	14
f	0	21	6	73.0449	3	4	210	GE4	12	3	m3	MedAnterior	5	14
f	0	21	7	83.8336	3	4	210	GE4	12	3	m3	MedAnterior	5	14
f	0	21	8	130.663	3	4	210	GE4	12	3	m3	MedAnterior	5	14
f	0	23	11	95.0607	3	4	210	GE4	11	3	m3	MedAnterior	5	14
f	0	23	12	61.9898	3	4	210	GE4	11	3	m3	MedAnterior	5	14
m	1	17	13	65.2595	3	4	210	GE4	11	3	m3	MedAnterior	5	14
m	1	17	14	77.6302	3	4	210	GE4	11	3	m3	MedAnterior	5	14
m	1	18	12	88.1527	3	4	210	GE4	12	3	m3	MedAnterior	5	14
m	1	18	13	70.9111	3	4	210	GE4	12	3	m3	MedAnterior	5	14
m	1	18	14	132.57	3	4	210	GE4	12	3	m3	MedAnterior	5	14
m	1	22	18	40.5639	3	4	210	GE4	12	3	m3	MedAnterior	5	14
m	1	22	19	50.9754	3	4	210	GE4	12	3	m3	MedAnterior	5	14
m	1	22	20	103.088	3	4	210	GE4	12	3	m3	MedAnterior	5	14
f	0	24	10	90.3922	4	4	400	GE1	12	3	m3	MedAnterior	5	14
f	0	24	11	134.148	4	4	400	GE1	12	3	m3	MedAnterior	5	14
f	0	24	12	83.5002	4	4	400	GE1	12	3	m3	MedAnterior	5	14
f	0	25	12	75.4631	4	4	400	GE1	12	3	m3	MedAnterior	5	14
f	0	25	13	53.864	4	4	400	GE1	12	3	m3	MedAnterior	5	14
f	0	25	14	87.6118	4	4	400	GE1	12	3	m3	MedAnterior	5	14
f	0	26	11	58.9185	4	4	400	GE1	12	3	m3	MedAnterior	5	14
f	0	26	12	73.9763	4	4	400	GE1	12	3	m3	MedAnterior	5	14
f	0	27	12	38.4211	4	4	400	GE1	12	3	m3	MedAnterior	5	14
f	0	27	13	83.1979	4	4	400	GE1	12	3	m3	MedAnterior	5	14
m	1	28	13	64.6336	4	4	400	GE1	12	3	m3	MedAnterior	5	14
m	1	28	14	130.07	4	4	400	GE1	12	3	m3	MedAnterior	5	14
m	1	28	15	57.3822	4	4	400	GE1	12	3	m3	MedAnterior	5	14
m	1	29	11	79.8197	4	4	400	GE1	12	3	m3	MedAnterior	5	14
m	1	29	12	88.0949	4	4	400	GE1	12	3	m3	MedAnterior	5	14
m	1	30	21	92.6991	4	4	400	GE1	12	3	m3	MedAnterior	5	14
m	1	30	22	67.1814	4	4	400	GE1	12	3	m3	MedAnterior	5	14
m	1	1	14	67.5793	3	5	210	GE4	11	3	m3	MedAnterior	5	14
m	1	1	15	98.964	3	5	210	GE4	11	3	m3	MedAnterior	5	14
f	0	6	14	94.2075	4	5	400	GE1	12	3	m3	MedAnterior	5	14
f	0	6	15	93.815	4	5	400	GE1	12	3	m3	MedAnterior	5	14
f	0	8	12	22.3072	4	5	400	GE1	11	3	m3	MedAnterior	5	14
f	0	8	13	123.161	4	5	400	GE1	11	3	m3	MedAnterior	5	14
f	0	8	14	91.6772	4	5	400	GE1	11	3	m3	MedAnterior	5	14
f	0	9	6	72.992	4	5	400	GE1	12	3	m3	MedAnterior	5	14
f	0	9	7	55.1843	4	5	400	GE1	12	3	m3	MedAnterior	5	14
f	0	9	8	35.9631	4	5	400	GE1	12	3	m3	MedAnterior	5	14
m	1	2	9	36.9991	4	5	400	GE1	11	3	m3	MedAnterior	5	14
m	1	2	10	63.5352	4	5	400	GE1	11	3	m3	MedAnterior	5	14
m	1	2	11	44.4863	4	5	400	GE1	11	3	m3	MedAnterior	5	14
m	1	3	8	61.0959	4	5	400	GE1	12	3	m3	MedAnterior	5	14
m	1	3	9	116.133	4	5	400	GE1	12	3	m3	MedAnterior	5	14
m	1	3	10	80.3206	4	5	400	GE1	12	3	m3	MedAnterior	5	14
m	1	4	21	63.2595	4	5	400	GE1	12	3	m3	MedAnterior	5	14
m	1	4	23	24.7203	4	5	400	GE1	12	3	m3	MedAnterior	5	14
m	1	4	24	73.3252	4	5	400	GE1	12	3	m3	MedAnterior	5	14
m	1	5	25	77.6848	4	5	400	GE1	12	3	m3	MedAnterior	5	14
m	1	5	26	49.9318	4	5	400	GE1	12	3	m3	MedAnterior	5	14
m	1	7	16	71.9974	4	5	400	GE1	12	3	m3	MedAnterior	5	14
m	1	7	17	84.7651	4	5	400	GE1	12	3	m3	MedAnterior	5	14
m	1	7	18	70.752	4	5	400	GE1	12	3	m3	MedAnterior	5	14
m	1	10	10	104.908	4	5	400	GE1	12	3	m3	MedAnterior	5	14
m	1	10	11	86.4654	4	5	400	GE1	12	3	m3	MedAnterior	5	14
f	0	3	16	29.1656	1	1	45	GE2	9	4/5	m4/5	MedAnterior	5	15
f	0	3	17	64.5354	1	1	45	GE2	9	4/5	m4/5	MedAnterior	5	15
f	0	3	18	85.2443	1	1	45	GE2	9	4/5	m4/5	MedAnterior	5	15
f	0	3	19	59.8316	1	1	45	GE2	9	4/5	m4/5	MedAnterior	5	15
f	0	4	32	183.242	1	1	45	GE2	10	4/5	m4/5	MedAnterior	5	15
f	0	4	33	95.6255	1	1	45	GE2	10	4/5	m4/5	MedAnterior	5	15
f	0	4	34	67.4242	1	1	45	GE2	10	4/5	m4/5	MedAnterior	5	15
f	0	4	35	130.873	1	1	45	GE2	10	4/5	m4/5	MedAnterior	5	15
f	0	4	36		1	1	45	GE2	10	4/5	m4/5	MedAnterior	5	15
f	0	4	37		1	1	45	GE2	10	4/5	m4/5	MedAnterior	5	15
f	0	12	17	66.1347	1	1	45	GE2	12	4/5	m4/5	MedAnterior	5	15
f	0	12	18	153.469	1	1	45	GE2	12	4/5	m4/5	MedAnterior	5	15
f	0	12	19	91.8434	1	1	45	GE2	12	4/5	m4/5	MedAnterior	5	15
f	0	13	15	106.752	1	1	45	GE2	12	4/5	m4/5	MedAnterior	5	15
f	0	13	16		1	1	45	GE2	12	4/5	m4/5	MedAnterior	5	15
f	0	13	17	117.073	1	1	45	GE2	12	4/5	m4/5	MedAnterior	5	15
f	0	13	18	47.351	1	1	45	GE2	12	4/5	m4/5	MedAnterior	5	15
m	1	1	32	90.6509	1	1	45	GE2	9	4/5	m4/5	MedAnterior	5	15
m	1	1	33	117.293	1	1	45	GE2	9	4/5	m4/5	MedAnterior	5	15
m	1	1	34	133.228	1	1	45	GE2	9	4/5	m4/5	MedAnterior	5	15
m	1	2	29	45.2858	1	1	45	GE2	11	4/5	m4/5	MedAnterior	5	15
m	1	2	30	36.5434	1	1	45	GE2	11	4/5	m4/5	MedAnterior	5	15
m	1	2	31	76.8297	1	1	45	GE2	11	4/5	m4/5	MedAnterior	5	15
m	1	2	32	68.0688	1	1	45	GE2	11	4/5	m4/5	MedAnterior	5	15
m	1	2	33	98.9592	1	1	45	GE2	11	4/5	m4/5	MedAnterior	5	15
m	1	5	21	61.7075	1	1	45	GE2	11	4/5	m4/5	MedAnterior	5	15
m	1	5	22	89.8506	1	1	45	GE2	11	4/5	m4/5	MedAnterior	5	15
m	1	5	23	21.432	1	1	45	GE2	11	4/5	m4/5	MedAnterior	5	15
f	0	10	11	107.669	2	1	120	GE3	11	4/5	m4/5	MedAnterior	5	15
f	0	10	12	178.99	2	1	120	GE3	11	4/5	m4/5	MedAnterior	5	15
f	0	11	14	103.09	2	1	120	GE3	12	4/5	m4/5	MedAnterior	5	15
f	0	11	15		2	1	120	GE3	12	4/5	m4/5	MedAnterior	5	15
f	0	11	16	103.749	2	1	120	GE3	12	4/5	m4/5	MedAnterior	5	15
f	0	18		47.3092	2	1	120	GE3	12	4/5	m4/5	MedAnterior	5	15
f	0	18			2	1	120	GE3	12	4/5	m4/5	MedAnterior	5	15
f	0	18		103.3	2	1	120	GE3	12	4/5	m4/5	MedAnterior	5	15
f	0	19	21	68.4548	2	1	120	GE3	11	4/5	m4/5	MedAnterior	5	15
f	0	19	22	103.298	2	1	120	GE3	11	4/5	m4/5	MedAnterior	5	15
f	0	19	23	168.344	2	1	120	GE3	11	4/5	m4/5	MedAnterior	5	15
m	1	6	20	103.551	2	1	120	GE3	12	4/5	m4/5	MedAnterior	5	15
m	1	6	21	66.7152	2	1	120	GE3	12	4/5	m4/5	MedAnterior	5	15
m	1	6	22	77.7899	2	1	120	GE3	12	4/5	m4/5	MedAnterior	5	15
m	1	7	20	59.5377	2	1	120	GE3	11	4/5	m4/5	MedAnterior	5	15
m	1	7	21	57.642	2	1	120	GE3	11	4/5	m4/5	MedAnterior	5	15
m	1	8	14	90.5813	2	1	120	GE3	11	4/5	m4/5	MedAnterior	5	15
m	1	8	15	95.1019	2	1	120	GE3	11	4/5	m4/5	MedAnterior	5	15
m	1	8	16	93.0071	2	1	120	GE3	11	4/5	m4/5	MedAnterior	5	15
m	1	8	17	67.1775	2	1	120	GE3	11	4/5	m4/5	MedAnterior	5	15
m	1	9	25		2	1	120	GE3	11	4/5	m4/5	MedAnterior	5	15
m	1	9	26	147.818	2	1	120	GE3	11	4/5	m4/5	MedAnterior	5	15
m	1	9	27	88.8398	2	1	120	GE3	11	4/5	m4/5	MedAnterior	5	15
f	0	14	15		3	1	210	GE4	12	4/5	m4/5	MedAnterior	5	15
f	0	14	16	24.1045	3	1	210	GE4	12	4/5	m4/5	MedAnterior	5	15
f	0	14	17	154.338	3	1	210	GE4	12	4/5	m4/5	MedAnterior	5	15
f	0	15	15	74.1226	3	1	210	GE4	12	4/5	m4/5	MedAnterior	5	15
f	0	15	16	84.5727	3	1	210	GE4	12	4/5	m4/5	MedAnterior	5	15
f	0	15	17	59.9681	3	1	210	GE4	12	4/5	m4/5	MedAnterior	5	15
f	0	27		78.4758	3	1	210	GE4	12	4/5	m4/5	MedAnterior	5	15
f	0	27		111.759	3	1	210	GE4	12	4/5	m4/5	MedAnterior	5	15
f	0	27		137.511	3	1	210	GE4	12	4/5	m4/5	MedAnterior	5	15
f	0	28	15	27.1115	3	1	210	GE4	12	4/5	m4/5	MedAnterior	5	15
f	0	28	16	156.972	3	1	210	GE4	12	4/5	m4/5	MedAnterior	5	15
f	0	28	17	119.639	3	1	210	GE4	12	4/5	m4/5	MedAnterior	5	15
m	1	16	15	107.166	3	1	210	GE4	11	4/5	m4/5	MedAnterior	5	15
m	1	16	16		3	1	210	GE4	11	4/5	m4/5	MedAnterior	5	15
m	1	16	17	89.3769	3	1	210	GE4	11	4/5	m4/5	MedAnterior	5	15
m	1	17	20	126.557	3	1	210	GE4	11	4/5	m4/5	MedAnterior	5	15
m	1	17	21	92.4506	3	1	210	GE4	11	4/5	m4/5	MedAnterior	5	15
m	1	17	22	93.634	3	1	210	GE4	11	4/5	m4/5	MedAnterior	5	15
m	1	29		124.654	3	1	210	GE4	12		m4/5	MedAnterior	5	15
m	1	29		145.165	3	1	210	GE4	12		m4/5	MedAnterior	5	15
m	1	29		105.744	3	1	210	GE4	12		m4/5	MedAnterior	5	15
f	0	23		54.148	4	1	400	GE1	12	4/5	m4/5	MedAnterior	5	15
f	0	23		158.168	4	1	400	GE1	12	4/5	m4/5	MedAnterior	5	15
f	0	23		93.8131	4	1	400	GE1	12	4/5	m4/5	MedAnterior	5	15
f	0	24	17	82.3819	4	1	400	GE1	12	4/5	m4/5	MedAnterior	5	15
f	0	24	18	119.675	4	1	400	GE1	12	4/5	m4/5	MedAnterior	5	15
f	0	24	19	102.574	4	1	400	GE1	12	4/5	m4/5	MedAnterior	5	15
f	0	25	17	167.923	4	1	400	GE1	12	4/5	m4/5	MedAnterior	5	15
f	0	25	18	236.225	4	1	400	GE1	12	4/5	m4/5	MedAnterior	5	15
f	0	25	19	88.4909	4	1	400	GE1	12	4/5	m4/5	MedAnterior	5	15
f	0	26	17	147.268	4	1	400	GE1	12	4/5	m4/5	MedAnterior	5	15
f	0	26	18	129.58	4	1	400	GE1	12	4/5	m4/5	MedAnterior	5	15
f	0	26	19	59.8853	4	1	400	GE1	12	4/5	m4/5	MedAnterior	5	15
m	1	20	19	92.6465	4	1	400	GE1	12	4/5	m4/5	MedAnterior	5	15
m	1	20	20	98.8868	4	1	400	GE1	12	4/5	m4/5	MedAnterior	5	15
m	1	20	21	89.9189	4	1	400	GE1	12	4/5	m4/5	MedAnterior	5	15
m	1	21	14	105.221	4	1	400	GE1	12	4/5	m4/5	MedAnterior	5	15
m	1	21	15	134.034	4	1	400	GE1	12	4/5	m4/5	MedAnterior	5	15
m	1	22	17	139.992	4	1	400	GE1	12	4/5	m4/5	MedAnterior	5	15
m	1	22	18	73.0192	4	1	400	GE1	12	4/5	m4/5	MedAnterior	5	15
m	1	22	19		4	1	400	GE1	12	4/5	m4/5	MedAnterior	5	15
f	0	1	22	58.7164	1	2	45	GE2	9	4/5	m4/5	MedAnterior	5	15
f	0	1	24	61.5314	1	2	45	GE2	9	4/5	m4/5	MedAnterior	5	15
f	0	2	22	85.6808	1	2	45	GE2	9	4/5	m4/5	MedAnterior	5	15
f	0	2	23	86.1987	1	2	45	GE2	9	4/5	m4/5	MedAnterior	5	15
f	0	2	24	15.6708	1	2	45	GE2	9	4/5	m4/5	MedAnterior	5	15
f	0	7	19	22.3704	1	2	45	GE2	10	4/5	m4/5	MedAnterior	5	15
f	0	7	20	94.6054	1	2	45	GE2	10	4/5	m4/5	MedAnterior	5	15
f	0	7	21	43.3439	1	2	45	GE2	10	4/5	m4/5	MedAnterior	5	15
f	0	7	22	37.1696	1	2	45	GE2	10	4/5	m4/5	MedAnterior	5	15
f	0	22		66.2969	1	2	45	GE2	12	4/5	m4/5	MedAnterior	5	15
f	0	22		19.6051	1	2	45	GE2	12	4/5	m4/5	MedAnterior	5	15
f	0	22		74.8037	1	2	45	GE2	12	4/5	m4/5	MedAnterior	5	15
m	1	3	26	12.4086	1	2	45	GE2	9	4/5	m4/5	MedAnterior	5	15
m	1	3	27	21.6885	1	2	45	GE2	9	4/5	m4/5	MedAnterior	5	15
m	1	3	28	30.5925	1	2	45	GE2	9	4/5	m4/5	MedAnterior	5	15
m	1	3	29	46.7114	1	2	45	GE2	9	4/5	m4/5	MedAnterior	5	15
m	1	3	30	14.9503	1	2	45	GE2	9	4/5	m4/5	MedAnterior	5	15
m	1	4	33	38.2345	1	2	45	GE2	9	4/5	m4/5	MedAnterior	5	15
m	1	4	34	33.6611	1	2	45	GE2	9	4/5	m4/5	MedAnterior	5	15
m	1	4	35	47.3705	1	2	45	GE2	9	4/5	m4/5	MedAnterior	5	15
m	1	4	36	26.8623	1	2	45	GE2	9	4/5	m4/5	MedAnterior	5	15
m	1	4	37	49.5579	1	2	45	GE2	9	4/5	m4/5	MedAnterior	5	15
m	1	4	38	83.1916	1	2	45	GE2	9	4/5	m4/5	MedAnterior	5	15
m	1	4	39	91.6619	1	2	45	GE2	9	4/5	m4/5	MedAnterior	5	15
m	1	5	25	95.675	1	2	45	GE2	10	4/5	m4/5	MedAnterior	5	15
m	1	5	26	101.156	1	2	45	GE2	10	4/5	m4/5	MedAnterior	5	15
m	1	5	27	61.4217	1	2	45	GE2	10	4/5	m4/5	MedAnterior	5	15
m	1	6	24	45.773	1	2	45	GE2	11	4/5	m4/5	MedAnterior	5	15
m	1	6	25	49.5038	1	2	45	GE2	11	4/5	m4/5	MedAnterior	5	15
m	1	6	26	61.5573	1	2	45	GE2	11	4/5	m4/5	MedAnterior	5	15
f	0	8	17	32.6397	2	2	120	GE3	10	4/5	m4/5	MedAnterior	5	15
f	0	8	18	79.9029	2	2	120	GE3	10	4/5	m4/5	MedAnterior	5	15
f	0	8	19	33.5359	2	2	120	GE3	10	4/5	m4/5	MedAnterior	5	15
f	0	8	20	61.9259	2	2	120	GE3	10	4/5	m4/5	MedAnterior	5	15
f	0	10		74.4941	2	2	120	GE3	11	4/5	m4/5	MedAnterior	5	15
f	0	10		32.301	2	2	120	GE3	11	4/5	m4/5	MedAnterior	5	15
f	0	10		49.2635	2	2	120	GE3	11	4/5	m4/5	MedAnterior	5	15
f	0	11		23.8449	2	2	120	GE3	11	4/5	m4/5	MedAnterior	5	15
f	0	11		11.2919	2	2	120	GE3	11	4/5	m4/5	MedAnterior	5	15
f	0	12	26	126.863	2	2	120	GE3	10	4/5	m4/5	MedAnterior	5	15
f	0	12	27	61.7596	2	2	120	GE3	10	4/5	m4/5	MedAnterior	5	15
f	0	12	28	31.3638	2	2	120	GE3	10	4/5	m4/5	MedAnterior	5	15
m	1	9	12	32.3948	2	2	120	GE3	11	4/5	m4/5	MedAnterior	5	15
m	1	9	13	87.2166	2	2	120	GE3	11	4/5	m4/5	MedAnterior	5	15
m	1	9	14	89.6916	2	2	120	GE3	11	4/5	m4/5	MedAnterior	5	15
m	1	13	18	4.93361	2	2	120	GE3	11	4/5	m4/5	MedAnterior	5	15
m	1	14	24	49.1294	2	2	120	GE3	13	4/5	m4/5	MedAnterior	5	15
m	1	14	25	45.5573	2	2	120	GE3	13	4/5	m4/5	MedAnterior	5	15
m	1	19		58.7025	2	2	120	GE3	12	4/5	m4/5	MedAnterior	5	15
m	1	19		102.283	2	2	120	GE3	12	4/5	m4/5	MedAnterior	5	15
m	1	19		137.452	2	2	120	GE3	12	4/5	m4/5	MedAnterior	5	15
f	0	15	17	47.2535	3	2	210	GE4	12	4/5	m4/5	MedAnterior	5	15
f	0	15	18	56.0762	3	2	210	GE4	12	4/5	m4/5	MedAnterior	5	15
f	0	15	19	22.9383	3	2	210	GE4	12	4/5	m4/5	MedAnterior	5	15
m	1	17	28	13.4893	3	2	210	GE4	12	4/5	m4/5	MedAnterior	5	15
m	1	17	29	54.6872	3	2	210	GE4	12	4/5	m4/5	MedAnterior	5	15
m	1	20		42.878	3	2	210	GE4	11	4/5	m4/5	MedAnterior	5	15
m	1	20		69.4037	3	2	210	GE4	11	4/5	m4/5	MedAnterior	5	15
m	1	20		49.4908	3	2	210	GE4	11	4/5	m4/5	MedAnterior	5	15
m	1	21		43.4466	3	2	210	GE4	11	4/5	m4/5	MedAnterior	5	15
m	1	21		53.2219	3	2	210	GE4	11	4/5	m4/5	MedAnterior	5	15
m	1	21		48.5243	3	2	210	GE4	11	4/5	m4/5	MedAnterior	5	15
f	0	16		47.6754	4	2	400	GE1	12	4/5	m4/5	MedAnterior	5	15
f	0	16		86.3782	4	2	400	GE1	12	4/5	m4/5	MedAnterior	5	15
m	1	18	21	39.1289	4	2	400	GE1	12	4/5	m4/5	MedAnterior	5	15
m	1	18	22	82.5613	4	2	400	GE1	12	4/5	m4/5	MedAnterior	5	15
m	1	18	23	37.5056	4	2	400	GE1	12	4/5	m4/5	MedAnterior	5	15
m	1	23		56.7032	4	2	400	GE1	12	4/5	m4/5	MedAnterior	5	15
m	1	23		60.8508	4	2	400	GE1	12	4/5	m4/5	MedAnterior	5	15
m	1	23		44.2754	4	2	400	GE1	12	4/5	m4/5	MedAnterior	5	15
f	0	15		63.5748	1	3	45	GE2	12	4/5	m4/5	MedAnterior	5	15
f	0	15		66.5268	1	3	45	GE2	12	4/5	m4/5	MedAnterior	5	15
f	0	15		59.3841	1	3	45	GE2	12	4/5	m4/5	MedAnterior	5	15
f	0	17		78.7321	1	3	45	GE2	11	4/5	m4/5	MedAnterior	5	15
f	0	17		64.6942	1	3	45	GE2	11	4/5	m4/5	MedAnterior	5	15
f	0	18	13	27.0782	1	3	45	GE2	11	4/5	m4/5	MedAnterior	5	15
f	0	18	14	64.5439	1	3	45	GE2	11	4/5	m4/5	MedAnterior	5	15
f	0	18	15	157.259	1	3	45	GE2	11	4/5	m4/5	MedAnterior	5	15
m	1	2	11	91.9631	1	3	45	GE2	12	4/5	m4/5	MedAnterior	5	15
m	1	2	12	139.973	1	3	45	GE2	12	4/5	m4/5	MedAnterior	5	15
m	1	3		64.0173	1	3	45	GE2	12	4/5	m4/5	MedAnterior	5	15
m	1	3		74.4023	1	3	45	GE2	12	4/5	m4/5	MedAnterior	5	15
m	1	3		88.1895	1	3	45	GE2	12	4/5	m4/5	MedAnterior	5	15
m	1	9	14	109.625	1	3	45	GE2	11	4/5	m4/5	MedAnterior	5	15
m	1	9	15	131.393	1	3	45	GE2	11	4/5	m4/5	MedAnterior	5	15
m	1	9	16	131.896	1	3	45	GE2	11	4/5	m4/5	MedAnterior	5	15
m	1	10	14	128.175	1	3	45	GE2	12	4/5	m4/5	MedAnterior	5	15
m	1	10	15	146.671	1	3	45	GE2	12	4/5	m4/5	MedAnterior	5	15
m	1	10	16	86.0043	1	3	45	GE2	12	4/5	m4/5	MedAnterior	5	15
f	0	1	14	39.8438	2	3	120	GE3	12	4/5	m4/5	MedAnterior	5	15
f	0	1	15	117.121	2	3	120	GE3	12	4/5	m4/5	MedAnterior	5	15
f	0	1	16	104.449	2	3	120	GE3	12	4/5	m4/5	MedAnterior	5	15
m	1	5		25.4714	2	3	120	GE3	12	4/5	m4/5	MedAnterior	5	15
m	1	5		133.294	2	3	120	GE3	12	4/5	m4/5	MedAnterior	5	15
m	1	5		81.5129	2	3	120	GE3	12	4/5	m4/5	MedAnterior	5	15
m	1	6		82.6422	2	3	120	GE3	12	4/5	m4/5	MedAnterior	5	15
m	1	6		132.434	2	3	120	GE3	12	4/5	m4/5	MedAnterior	5	15
m	1	6		89.1375	2	3	120	GE3	12	4/5	m4/5	MedAnterior	5	15
m	1	7		86.0035	2	3	120	GE3	12	4/5	m4/5	MedAnterior	5	15
m	1	7		114.985	2	3	120	GE3	12	4/5	m4/5	MedAnterior	5	15
m	1	7		83.0022	2	3	120	GE3	12	4/5	m4/5	MedAnterior	5	15
m	1	19		96.1625	2	3	120	GE3	12	4/5	m4/5	MedAnterior	5	15
m	1	19		43.109	2	3	120	GE3	12	4/5	m4/5	MedAnterior	5	15
m	1	23		25.9631	2	3	120	GE3	1900-01-12	4/5	m4/5	MedAnterior	5	15
m	1	23		95.2811	2	3	120	GE3	1900-01-12	4/5	m4/5	MedAnterior	5	15
m	1	23		50.0652	2	3	120	GE3	1900-01-12	4/5	m4/5	MedAnterior	5	15
f	0	16	17	65.7102	3	3	210	GE4	11	4/5	m4/5	MedAnterior	5	15
f	0	16	18	89.3985	3	3	210	GE4	11	4/5	m4/5	MedAnterior	5	15
f	0	16	19	90.1954	3	3	210	GE4	11	4/5	m4/5	MedAnterior	5	15
f	0	20		171.743	3	3	210	GE4	11	4/5	m4/5	MedAnterior	5	15
f	0	20		98.6329	3	3	210	GE4	11	4/5	m4/5	MedAnterior	5	15
f	0	20		104.124	3	3	210	GE4	11	4/5	m4/5	MedAnterior	5	15
f	0	21	16	138.06	3	3	210	GE4	11	4/5	m4/5	MedAnterior	5	15
f	0	21	17		3	3	210	GE4	11	4/5	m4/5	MedAnterior	5	15
f	0	21	18	56.9019	3	3	210	GE4	11	4/5	m4/5	MedAnterior	5	15
m	1	4		114.531	3	3	210	GE4	11	4/5	m4/5	MedAnterior	5	15
m	1	4		96.015	3	3	210	GE4	11	4/5	m4/5	MedAnterior	5	15
m	1	4		132.171	3	3	210	GE4	11	4/5	m4/5	MedAnterior	5	15
m	1	8		20.3203	3	3	210	GE4	12	4/5	m4/5	MedAnterior	5	15
m	1	8			3	3	210	GE4	12	4/5	m4/5	MedAnterior	5	15
m	1	8		76.8772	3	3	210	GE4	12	4/5	m4/5	MedAnterior	5	15
m	1	11	16	177.917	3	3	210	GE4	12	4/5	m4/5	MedAnterior	5	15
m	1	11	17	118.041	3	3	210	GE4	12	4/5	m4/5	MedAnterior	5	15
m	1	11	18	39.635	3	3	210	GE4	12	4/5	m4/5	MedAnterior	5	15
f	0	13		175.042	4	3	400	GE1	12	4/5	m4/5	MedAnterior	5	15
f	0	13		154.363	4	3	400	GE1	12	4/5	m4/5	MedAnterior	5	15
f	0	14		80.8622	4	3	400	GE1	11	4/5	m4/5	MedAnterior	5	15
f	0	14		99.2218	4	3	400	GE1	11	4/5	m4/5	MedAnterior	5	15
f	0	14		93.3554	4	3	400	GE1	11	4/5	m4/5	MedAnterior	5	15
f	0	25	20	110.506	4	3	400	GE1	1900-01-12	4/5	m4/5	MedAnterior	5	15
f	0	25	21	48.7885	4	3	400	GE1	1900-01-12	4/5	m4/5	MedAnterior	5	15
f	0	25	22	73.8626	4	3	400	GE1	1900-01-12	4/5	m4/5	MedAnterior	5	15
m	1	12		65.0682	4	3	400	GE1	12	4/5	m4/5	MedAnterior	5	15
m	1	12		95.6376	4	3	400	GE1	12	4/5	m4/5	MedAnterior	5	15
m	1	12		107.948	4	3	400	GE1	12	4/5	m4/5	MedAnterior	5	15
m	1	22		122.268	4	3	400	GE1	12	4/5	m4/5	MedAnterior	5	15
m	1	22		104.698	4	3	400	GE1	12	4/5	m4/5	MedAnterior	5	15
m	1	22		59.2099	4	3	400	GE1	12	4/5	m4/5	MedAnterior	5	15
m	1	24		29.2489	4	3	400	GE1	1900-01-11	4/5	m4/5	MedAnterior	5	15
m	1	24		68.03	4	3	400	GE1	1900-01-11	4/5	m4/5	MedAnterior	5	15
m	1	26	24	105.979	4	3	400	GE1	1900-01-12	4/5	m4/5	MedAnterior	5	15
m	1	26	25	74.1509	4	3	400	GE1	1900-01-12	4/5	m4/5	MedAnterior	5	15
m	1	26	26	146.2	4	3	400	GE1	1900-01-12	4/5	m4/5	MedAnterior	5	15
f	0	2	43	122.45	1	4	45	GE2	10	4/5	m4/5	MedAnterior	5	15
[truncated: 1,358 more rows]
