# Supplementary material for: A novel, ataxic mouse model of ataxia telangiectasia caused by a clinically relevant nonsense mutation
Source: eLife journal article supplement (doi:10.7554/elife.64695), 2021-11-01
Supplement: fig5-data1 [file Figure 5-Cerebellum size.xlsx]

## Sheet: Brain area measurements
Animal ID	Sex	Genotype	Age (d)	Cerebellum area mm^2	Forebrain area mm^2	Ratio
753	F	AtmN/N; Aptx-/-	460	18.799	69.463	0.270633
655	F	AtmN/N; Aptx-/-	473	16.839	80.41	0.209414
695	F	AtmN/N; Aptx-/-	465	18.684	73.937	0.252702			BI	Bad image
698	F	AtmN/N; Aptx-/-	465	17.56	73.124	0.24014
708	F	AtmN/N; Aptx-/-	472	20.996	75.76	0.277138
654	F	AtmN/N; Aptx-/-	473	19.789	73.596	0.268887
731	M	AtmN/N; Aptx-/-	462	18.629	70.707	0.263468
689	M	AtmN/N; Aptx-/-	462	21.774	70.207	0.31014
699	M	AtmN/N; Aptx-/-	465	17.058	74.155	0.230032
666	M	AtmN/N; Aptx-/-	471	20.684	79.157	0.261303
977	F	AtmN/N; Aptx+/+	459	21.472	77.521	0.276983
1074	F	AtmN/N; Aptx+/+	543	26.303	73.633	0.357218
1096	F	AtmN/N; Aptx+/+	542	21.34	76.63	0.278481
981	M	AtmN/N; Aptx+/+	459	25.859	72.168	0.358317
721	M	AtmN/N; Aptx+/+	468	24.641	72.087	0.341823
902	M	AtmN/N; Aptx+/+	478	27.308	66.085	0.413225
1248	M	AtmN/N; Aptx+/+	500	23.803	70.133	0.339398
1250	M	AtmN/N; Aptx+/+	500	22.776	71.204	0.31987
1015	M	AtmN/N; Aptx+/+	555	25.271	72.864	0.346824
1017	M	AtmN/N; Aptx+/+	555	22.563	74.761	0.301802
591	M	AtmN/Wt; Aptx-/-	466	23.58	77.99	0.302346
703	M	AtmN/Wt; Aptx-/-	463	25.37	80.261	0.316094
569	M	AtmN/Wt; Aptx-/-	465	20.862	64.885	0.321523
567	M	AtmN/Wt; Aptx-/-	465	21.607	66.579	0.324532
593	M	AtmN/Wt; Aptx-/-	466	25.92	75.058	0.345333
553	M	AtmN/Wt; Aptx-/-	469	22.53	65.039	0.346408
978	F	AtmN/Wt; Aptx+/+	459	27.464	74.81	0.367117
980	F	AtmN/Wt; Aptx+/+	459	26.183	79.683	0.32859
719	F	AtmN/Wt; Aptx+/+	461	23.324	75.419	0.309259
865	F	AtmN/Wt; Aptx+/+	591	25.877	71.337	0.362743
682	M	AtmN/Wt; Aptx+/+	466	25.716	80.534	0.319319
755	F	AtmWt/Wt; Aptx-/-	460	26.317	77.971	0.337523
764	F	AtmWt/Wt; Aptx-/-	458	22.808	81.006	0.281559
696	F	AtmWt/Wt; Aptx-/-	465	22.135	72.601	0.304886
697	F	AtmWt/Wt; Aptx-/-	465	20.836	79.688	0.26147
625	F	AtmWt/Wt; Aptx-/-	464	21.778	62.014	0.351179
586	F	AtmWt/Wt; Aptx-/-	466	23.115	75.551	0.305952
706	F	AtmWt/Wt; Aptx-/-	472	21.516	81.683	0.263409
550	M	AtmWt/Wt; Aptx-/-	463	25.501	61.053	0.417686
566	M	AtmWt/Wt; Aptx-/-	465	20.106	63.662	0.315824
570	M	AtmWt/Wt; Aptx-/-	465	20.908	65.246	0.320449
668	M	AtmWt/Wt; Aptx-/-	471	25.476	79.379	0.320941
669	M	AtmWt/Wt; Aptx-/-	471	21.4	83.411	0.256561
648	F	AtmWt/Wt; Aptx-/-	456	BI
661	M	AtmWt/Wt; Aptx-/-	472	BI
663	M	AtmWt/Wt; Aptx-/-	472	BI		#VALUE!
821	F	AtmWt/Wt; Aptx+/+	431	23.061	80.833	0.285292
628	F	AtmWt/Wt; Aptx+/+	459	20.626	61.771	0.333911
735	F	AtmWt/Wt; Aptx+/+	459	23.389	79.205	0.295297
676	F	AtmWt/Wt; Aptx+/+	466	25.494	79.681	0.319951
874	F	AtmWt/Wt; Aptx+/+	475	20.752	77.548	0.267602
875	F	AtmWt/Wt; Aptx+/+	475	23.37	79.659	0.293376
876	F	AtmWt/Wt; Aptx+/+	475	23.574	77.945	0.302444
877	F	AtmWt/Wt; Aptx+/+	475	26.506	76.643	0.345837
799	M	AtmWt/Wt; Aptx+/+	454	23.556	75.165	0.313391
800	M	AtmWt/Wt; Aptx+/+	454	21.164	74.739	0.283172
801	M	AtmWt/Wt; Aptx+/+	454	25.031	72.198	0.346699
798	M	AtmWt/Wt; Aptx+/+	454	22.907	82.191	0.278704
741	M	AtmWt/Wt; Aptx+/+	459	25.066	76.705	0.326784
722	M	AtmWt/Wt; Aptx+/+	461	22.934	70.081	0.32725
723	M	AtmWt/Wt; Aptx+/+	461	22.738	69.724	0.326114
680	M	AtmWt/Wt; Aptx+/+	466	25.871	86.575	0.298828
681	M	AtmWt/Wt; Aptx+/+	466	27.9	81.794	0.341101
720	M	AtmWt/Wt; Aptx+/+	468	22.794	76.911	0.296369
903	M	AtmWt/Wt; Aptx+/+	478	24.087	73.77	0.326515
904	M	AtmWt/Wt; Aptx+/+	478	24.248	74.725	0.324496
888	F	AtmN/N; Aptx-/-	404	23.163	79.046	0.293032
891	F	AtmN/N; Aptx-/-	404	22.029	74.624	0.2952
947	F	AtmN/N; Aptx-/-	401	22.254	71.384	0.311751
952	F	AtmN/N; Aptx-/-	393	23.077	76.369	0.302178
853	M	AtmN/N; Aptx-/-	405	17.074	63.717	0.267966
894	M	AtmN/N; Aptx-/-	404	21.425	80.141	0.267341
989	M	AtmN/N; Aptx-/-	399	24.2	75.072	0.322357
1906	M	AtmN/N; Aptx-/-	399	22.582	68.603	0.329169
1262	F	AtmN/N; Aptx+/+	402	24.654	78.278	0.314954
1306	F	AtmN/N; Aptx+/+	397	25.805	70.271	0.367221
1875	F	AtmN/N; Aptx+/+	390	22.185	70.187	0.316084
1266	M	AtmN/N; Aptx+/+	400	26.121	72.123	0.362173
1915	M	AtmN/N; Aptx+/+	388	23.585	67.555	0.349123
1917	M	AtmN/N; Aptx+/+	388	23.513	72.824	0.322874
760	M	AtmN/Wt; Aptx-/-	400	BI		#VALUE!
985	F	AtmWt/Wt; Aptx-/-	403	24.661	82.087	0.300425
986	F	AtmWt/Wt; Aptx-/-	403	25.961	82.917	0.313096
1001	F	AtmWt/Wt; Aptx-/-	401	26.304	65.705	0.400335
1003	F	AtmWt/Wt; Aptx-/-	403	24.588	63.486	0.387298
1004	F	AtmWt/Wt; Aptx-/-	400	23.802	72.164	0.329832
1024	F	AtmWt/Wt; Aptx-/-	403	23.29	60.919	0.382311
1007	M	AtmWt/Wt; Aptx-/-	400	25.554	77.175	0.331118
1042	M	AtmWt/Wt; Aptx-/-	404	26.686	69.303	0.385063
1049	M	AtmWt/Wt; Aptx-/-	404	27.09	78.209	0.34638
1069	M	AtmWt/Wt; Aptx-/-	397	28.645	77.586	0.369203
1104	M	AtmWt/Wt; Aptx-/-	394	25.878	68.494	0.377814
953	F	AtmWt/Wt; Aptx+/+	399	24.809	78.551	0.315833
955	F	AtmWt/Wt; Aptx+/+	398	27.263	75.722	0.360041
956	F	AtmWt/Wt; Aptx+/+	398	23.836	74.782	0.31874
957	F	AtmWt/Wt; Aptx+/+	398	26.316	75.951	0.346487
958	F	AtmWt/Wt; Aptx+/+	398	25.926	70.819	0.366088
959	F	AtmWt/Wt; Aptx+/+	398	26.09	72.562	0.359555
960	F	AtmWt/Wt; Aptx+/+	398	26.162	76.459	0.34217
961	F	AtmWt/Wt; Aptx+/+	398	26.036	75.676	0.344046
879	M	AtmWt/Wt; Aptx+/+	401	24.836	78.347	0.317
880	M	AtmWt/Wt; Aptx+/+	401	24.492	73.979	0.331067
881	M	AtmWt/Wt; Aptx+/+	401	23.408	80.81	0.289667
882	M	AtmWt/Wt; Aptx+/+	401	26.603	78.157	0.340379
915	M	AtmWt/Wt; Aptx+/+	400	25.835	81.962	0.315207
916	M	AtmWt/Wt; Aptx+/+	400	26.669	79.927	0.333667
917	M	AtmWt/Wt; Aptx+/+	400	25.387	84.07	0.301975
918	M	AtmWt/Wt; Aptx+/+	400	25.821	81.039	0.318624
1711	F	AtmN/N; Aptx-/-	210	25.523	69.349	0.368037
2222	F	AtmN/N; Aptx-/-	208	17.245	69.97	0.246463
2223	F	AtmN/N; Aptx-/-	208	16.832	73.36	0.229444
2004	M	AtmN/N; Aptx-/-	212	18.549	71.737	0.258569
2040	M	AtmN/N; Aptx-/-	203	19.177	61.926	0.309676
2218	M	AtmN/N; Aptx-/-	216	19.637	76.242	0.257561
1947	F	AtmN/N; Aptx+/+	210	25.477	81.064	0.314283
2010	F	AtmN/N; Aptx+/+	210	27.216	66.555	0.408925
2020	F	AtmN/N; Aptx+/+	209	28.052	73.825	0.37998
2029	F	AtmN/N; Aptx+/+	210	26.831	73.275	0.366169
2031	F	AtmN/N; Aptx+/+	210	27.259	77.085	0.353623
2032	F	AtmN/N; Aptx+/+	210	27.066	67.707	0.399752
2178	F	AtmN/N; Aptx+/+	207	28.53	70.839	0.402744
2311	F	AtmN/N; Aptx+/+	214	26.094	71.581	0.364538
2314	F	AtmN/N; Aptx+/+	213	27.076	73.552	0.368121
2016	M	AtmN/N; Aptx+/+	210	24.856	73.088	0.340083
2017	M	AtmN/N; Aptx+/+	210	22.827	79.119	0.288515
2026	M	AtmN/N; Aptx+/+	209	27.91	76.324	0.365678
2038	M	AtmN/N; Aptx+/+	210	26.778	75.493	0.354708
2078	M	AtmN/N; Aptx+/+	210	24.064	68.687	0.350343
2118	M	AtmN/N; Aptx+/+	208	28.106	77.191	0.36411
2151	M	AtmN/N; Aptx+/+	207	23.375	65.352	0.357678
1576	F	AtmWt/Wt; Aptx-/-	216	31.421	78.766	0.398916
1616	F	AtmWt/Wt; Aptx-/-	208	26.98	64.569	0.417848
1645	F	AtmWt/Wt; Aptx-/-	210	22.221	71.173	0.312211
1447	M	AtmWt/Wt; Aptx-/-	214	21.904	72.702	0.301285
1449	M	AtmWt/Wt; Aptx-/-	214	22.642	69.1	0.32767
1642	M	AtmWt/Wt; Aptx-/-	214	28.809	70.968	0.405944
1665	M	AtmWt/Wt; Aptx-/-	210	25.827	76.1	0.339382
1786	M	AtmWt/Wt; Aptx-/-	215	21.729	71.873	0.302325
1693	F	AtmWt/Wt; Aptx+/+	208	27.409	78.785	0.347896
1694	F	AtmWt/Wt; Aptx+/+	209	29.796	72.316	0.412025
1802	F	AtmWt/Wt; Aptx+/+	211	26.367	73.475	0.358857
1814	F	AtmWt/Wt; Aptx+/+	209	23.277	71.322	0.326365
1919	F	AtmWt/Wt; Aptx+/+	211	25.394	78.15	0.324939
2018	F	AtmWt/Wt; Aptx+/+	208	26.915	74.301	0.362243
2035	F	AtmWt/Wt; Aptx+/+	202	28.262	80.092	0.352869
1741	M	AtmWt/Wt; Aptx+/+	213	25.419	69.703	0.364676
1808	M	AtmWt/Wt; Aptx+/+	209	24.574	70.255	0.349783
2087	M	AtmWt/Wt; Aptx+/+	215	27.922	77.596	0.359838
2171	M	AtmWt/Wt; Aptx+/+	211	22.662	74.171	0.305537
1670	F	AtmN/N; Aptx-/-	120	23	65.534	0.350963
1671	F	AtmN/N; Aptx-/-	120	24.97	69.706	0.358219
1695	F	AtmN/N; Aptx-/-	121	22.123	78.061	0.283407
1657	M	AtmN/N; Aptx-/-	119	20.214	69.371	0.29139
1830	M	AtmN/N; Aptx-/-	120	20.876	67.103	0.311104
1874	M	AtmN/N; Aptx-/-	125	25.335	70.655	0.358573
2155	F	AtmN/N; Aptx+/+	117	30.193	73.408	0.411304
2377	F	AtmN/N; Aptx+/+	123	28.159	77.141	0.365033
2399	F	AtmN/N; Aptx+/+	119	22.778	75.822	0.300414
2436	F	AtmN/N; Aptx+/+	113	25.89	73.942	0.350139
2437	F	AtmN/N; Aptx+/+	113	27.513	81.054	0.33944
2502	F	AtmN/N; Aptx+/+	123	BI
2697	F	AtmN/N; Aptx+/+	121	24.348	70.84	0.343704
2159	M	AtmN/N; Aptx+/+	122	27.087	80.031	0.338456
2184	M	AtmN/N; Aptx+/+	119	24.23	69.828	0.346995
2303	M	AtmN/N; Aptx+/+	122	22.872	65.276	0.350389
2319	M	AtmN/N; Aptx+/+	121	26.311	72.981	0.360518
2321	M	AtmN/N; Aptx+/+	121	22.998	70.522	0.326111
2440	M	AtmN/N; Aptx+/+	113	26.2	80.117	0.327022
2493	M	AtmN/N; Aptx+/+	124	23.059	74.485	0.309579
2519	M	AtmN/N; Aptx+/+	117	BI
2563	M	AtmN/N; Aptx+/+	123	23.571	68.283	0.345196
1724	F	AtmWt/Wt; Aptx-/-	117	23.641	78.589	0.300818
1725	F	AtmWt/Wt; Aptx-/-	117	27.628	78.415	0.352331
1706	M	AtmWt/Wt; Aptx-/-	120	27.29	78.946	0.345679
1735	M	AtmWt/Wt; Aptx-/-	121	23.084	79.603	0.289989
2091	F	AtmWt/Wt; Aptx+/+	119	28.546	78.572	0.36331
2117	F	AtmWt/Wt; Aptx+/+	109	29.211	78.973	0.369886
2152	F	AtmWt/Wt; Aptx+/+	117	30.79	77.545	0.39706
2167	F	AtmWt/Wt; Aptx+/+	114	28.908	76.465	0.378055
2501	F	AtmWt/Wt; Aptx+/+	123	26.196	74.245	0.352832
1709	M	AtmWt/Wt; Aptx+/+	120	27.159	81.021	0.335209
1809	M	AtmWt/Wt; Aptx+/+	121	26.831	70.743	0.379274
1818	M	AtmWt/Wt; Aptx+/+	121	23.161	74.482	0.310961
1820	M	AtmWt/Wt; Aptx+/+	118	22.375	79.626	0.281001
2467	M	AtmWt/Wt; Aptx+/+	102	24.978	78.104	0.319804
1710	F	AtmN/N; Aptx-/-	47	21.436	65.15	0.329025
1712	F	AtmN/N; Aptx-/-	47	22.78	66.005	0.345125
2580	F	AtmN/N; Aptx-/-	44	23.197	67.452	0.343904
1412	M	AtmN/N; Aptx-/-	39	17.196	66.026	0.260443
1729	M	AtmN/N; Aptx-/-	46	21.479	74.748	0.287352
2597	F	AtmN/N; Aptx+/+	45	24.256	75.035	0.323262
2629	F	AtmN/N; Aptx+/+	49	28.626	76.16	0.375867
2638	F	AtmN/N; Aptx+/+	25	24.946	69.423	0.359333
2651	F	AtmN/N; Aptx+/+	46	17.915	72.16	0.248268
2656	F	AtmN/N; Aptx+/+	46	20.49	76.627	0.267399
2381	M	AtmN/N; Aptx+/+	47	27.311	81.72	0.334202
2403	M	AtmN/N; Aptx+/+	43	24.27	78.425	0.309468
2405	M	AtmN/N; Aptx+/+	43	24.863	73.38	0.338825
2407	M	AtmN/N; Aptx+/+	43	23.018	67.656	0.340221
2408	M	AtmN/N; Aptx+/+	43	21.867	67.522	0.32385
2573	M	AtmN/N; Aptx+/+	45	25.964	71.26	0.364356
2577	M	AtmN/N; Aptx+/+	46	25.151	75.162	0.334624
1644	F	AtmWt/Wt; Aptx-/-	50	21.987	67.666	0.324934
1726	F	AtmWt/Wt; Aptx-/-	45	23.256	75.197	0.309268
1760	F	AtmWt/Wt; Aptx-/-	38	19.289	67.618	0.285264
1756	M	AtmWt/Wt; Aptx-/-	45	23.616	69.533	0.339637
1757	M	AtmWt/Wt; Aptx-/-	46	23.812	74.565	0.319346
2299	F	AtmWt/Wt; Aptx+/+	45	25.694	73.275	0.350652
2562	F	AtmWt/Wt; Aptx+/+	54	23.038	66.443	0.346733
973	M	AtmWt/Wt; Aptx+/+	42	24.834	80.21	0.309612
1949	M	AtmWt/Wt; Aptx+/+	46	21.855	79.274	0.275689

## Sheet: Cell number per length
Medial Sections, Lobule 8 dorsal area contour: Calbindin					Summary
					Mouse ID	Timepoint (days)	Genotype	Length Uncalibrated (pixel)	Length (*0.3196) um	Calb+ cells	PNs/100um
					833	400	Atm N/N; Aptx -/-	886.71	328.083	14	4.26722
					837	400	Atm N/N; Aptx -/-	676.45	250.287	10	3.99542
					891	400	Atm N/N; Aptx -/-	821.21	303.848	12	3.94935
					894	400	Atm N/N; Aptx -/-	855.62	316.579	16	5.05402
					947	400	Atm N/N; Aptx -/-	703.31	260.225	11	4.22712
					956	400	Atm wt/wt; Aptx +/+	977.02	361.497	20	5.53254
					881	400	Atm wt/wt; Aptx +/+	953.41	352.762	22	6.2365
					882	400	Atm wt/wt; Aptx +/+	752.91	278.577	18	6.46142
					953	400	Atm wt/wt; Aptx +/+	1059.69	392.085	19	4.84588
					915	400	Atm wt/wt; Aptx +/+	942	348.54	23	6.59896
					1032	45	Atm N/N; Aptx -/-	845.674	312.899	23	7.35061
					1035	45	Atm N/N; Aptx -/-	835.275	309.052	24	7.76569
					1046	45	Atm N/N; Aptx -/-	788.684	291.813	30	10.2806
					1048	45	Atm N/N; Aptx -/-	1079	399.229	26	6.51255
					1066	45	Atm N/N; Aptx -/-	1012.8	374.736	29	7.73878
					1070	45	Atm N/N; Aptx -/-	828.242	306.449	26	8.48427
					1051	45	Atm wt/wt; Aptx +/+	1119.3	414.14	29	7.00246
					1052	45	Atm wt/wt; Aptx +/+	1060.16	392.26	28	7.13812
					1053	45	Atm wt/wt; Aptx +/+	1064.58	393.894	23	5.83914
					1054	45	Atm wt/wt; Aptx +/+	1106.87	409.544	29	7.08105
					1150	45	Atm wt/wt; Aptx +/+	1014.02	375.186	25	6.66335
					1160	45	Atm wt/wt; Aptx +/+	928.924	343.702	27	7.85565

## Sheet: Cell diameter
Mouse ID#	Cells with fully defined somatic bodies
400 day
883R	Feature Name	Area Uncalibrated(pix^2)	Percent Area (%)	Diameter, Mean(pix)		Diameter (uM)				Summary of PN diameters
	P1R4	201	0.496272	14.7357		5.45221				Mouse ID	Timepoint	Genotype
	P1R5	357	0.881438	20.4998		7.58493				833	400d	Atm N/N; Aptx -/-	7.35175
	P1R7	453	1.11846	22.9311		8.48452				837	400d	Atm N/N; Aptx -/-	7.46385
	P1R13	237	0.585156	16.1453		5.97378				891	400d	Atm N/N; Aptx -/-	6.92604
	P1R14	371	0.916004	20.4779		7.57683				894	400d	Atm N/N; Aptx -/-	9.12659
	P1R17	506	1.24932	24.4277		9.03826				947	400d	Atm N/N; Aptx -/-	8.90467
					average	7.35175
										956	400d	Atm wt/wt; Aptx +/+	10.6585		0.0184446
837R	Feature Name	Area Uncalibrated(pix^2)	Percent Area (%)	Diameter, Mean(pix)						881	400d	Atm wt/wt; Aptx +/+	8.96577
	P1R5	384	0.969893	20.65		7.64049				882	400d	Atm wt/wt; Aptx +/+	10.2346
	P1R9	446	1.12649	22.7296		8.40996				953	400d	Atm wt/wt; Aptx +/+	11.1727
	P1R14	161	0.406648	13.3147		4.92644				915	400d	Atm wt/wt; Aptx +/+	8.57014
	P1R17	273	0.689533	17.1889		6.35991
	P1R18	393	0.992625	21.2982		7.88034
	P1R13	393	0.992625	21.227		7.85399				1032	45	Atm N/N; Aptx -/-	8.54316
	P1R14	538	1.35886	24.7995		9.17582				1035	45	Atm N/N; Aptx -/-	8.39231
					average	7.46385				1046	45	Atm N/N; Aptx -/-	9.08937		0.0413865
										1048	45	Atm N/N; Aptx -/-	8.99921
894R	Feature Name	Area Uncalibrated(pix^2)	Percent Area (%)	Diameter, Mean(pix)						1066	45	Atm N/N; Aptx -/-	10.5862
	P1R1	263	0.401459	17.8497		6.60437				1070	45	Atm N/N; Aptx -/-	9.43899
	P1R17	517	0.78918	24.5879		9.09754
	P1R20	370	0.564791	20.7177		7.66556				1051	45	Atm wt/wt; Aptx +/+	11.3741
	P1R23	425	0.648746	22.2823		8.24446				1052	45	Atm wt/wt; Aptx +/+	9.71333
	P1R29	624	0.952512	28.5522		10.5643				1053	45	Atm wt/wt; Aptx +/+	9.51008
	P1R31	496	0.757125	24.26		8.97621				1054	45	Atm wt/wt; Aptx +/+	9.84852
	P1R33	665	1.0151	27.7597		10.2711				1150	45	Atm wt/wt; Aptx +/+	10.6046
	P1R38	422	0.644167	23.3118		8.62538				1160	45	Atm wt/wt; Aptx +/+	10.0193
	P1R40	548	0.836501	25.3597		9.38308
	P1R42	784	1.19675	30.5663		11.3095
	P1R50	558	0.851765	26.0837		9.65096
					average	9.12659
891R	Feature Name	Area Uncalibrated(pix^2)	Percent Area (%)	Diameter, Mean(pix)
	P1R4	234	0.355434	16.1688		5.98247
	P1R10	388	0.589352	20.8922		7.73012
	P1R18	243	0.369105	16.052		5.93925
	P1R21	370	0.562011	20.9751		7.7608
	P1R24	273	0.414673	17.3831		6.43173
	P1R25	269	0.408597	17.4253		6.44737
	P1R15	377	0.572644	21.7518		8.04818
	P1R16	304	0.46176	19.1038		7.0684
					average	6.92604
947R (2nd)	Feature Name	Area Uncalibrated(pix^2)	Percent Area (%)	Diameter, Mean(pix)
	P1R1	561	1.30907	26.3413		9.74629
	P1R2	429	1.00105	22.397		8.28687
	P1R8	565	1.3184	24.7192		9.1461
	P1R9	445	1.03839	22.3839		8.28205
	P1R13	103	0.240345	16.197		5.99288
	P1R15	749	1.74775	29.786		11.0208
	P1R18	841	1.96243	31.6183		11.6988
	P1R22	591	1.37907	25.5125		9.43961
	P1R26	302	0.704702	20.3508		7.52981
	P1R28	306	0.714036	20.3995		7.54782
	P1R34	549	1.28106	25.0281		9.26038
					average	8.90467
881R	Feature Name	Area Uncalibrated(pix^2)	Percent Area (%)	Diameter, Mean(pix)
	P1R1	345	0.648362	22.204		8.21548
	P1R5	543	1.02047	25.094		9.28478
	P1R11	340	0.638966	19.8447		7.34253
	P1R24	267	0.501776	17.6209		6.51972
	P1R25	408	0.766759	21.6168		7.99822
	P1R27	468	0.879517	25.5478		9.45268
	P1R31	788	1.4809	31.0033		11.4712
	P1R32	634	1.19148	27.3787		10.1301
	P1R33	519	0.975362	25.6491		9.49015
	P1R35	321	0.603259	20.2187		7.48092
	P1R47	811	1.52412	30.372		11.2376
					average	8.96577
882R	Feature Name	Area Uncalibrated(pix^2)	Percent Area (%)	Diameter, Mean(pix)
	P2R10	535	0.428954	24.2769		8.98245
	P2R11	823	0.659868	33.0555		12.2305
	P2R15	547	0.438575	25.8633		9.56943
	P2R18	703	0.563654	29.4878		10.9105
	P2R20	748	0.599734	32.1918		11.911
	P2R23	966	0.774523	33.2833		12.3148
	P2R39	424	0.339956	22.6214		8.36991
	P2R43	393	0.315101	20.8894		7.72908
	P2R49	334	0.267796	19.6518		7.27115
	P2R50	724	0.580491	29.376		10.8691
	P2R55	1105	0.88597	36.343		13.4469
	P2R58	494	0.396081	23.2122		8.58851
	P2R62	559	0.448197	25.3121		9.36547
	P2R65	543	0.435368	25.1635		9.31049
	P2R71	1004	0.80499	34.1876		12.6494
					average	10.2346
953R	Feature Name	Area Uncalibrated(pix^2)	Percent Area (%)	Diameter, Mean(pix)
	P1R1	706	0.929204	28.8172		10.6624
	P1R8	792	1.04239	30.3657		11.2353
	P1R11	643	0.846286	27.0949		10.0251
	P1R15	759	0.99896	29.5513		10.934
	P1R17	669	0.880506	27.1828		10.0577
	P1R19	880	1.15821	32.3985		11.9874
	P1R23	1044	1.37406	35.7737		13.2363
	P1R35	1042	1.37143	35.2068		13.0265
	P1R39	1045	1.37538	35.0685		12.9753
	P1R40	426	0.560681	21.9335		8.11541
	P1R43	1008	1.32668	34.3946		12.726
	P1R54	740	0.973953	29.2711		10.8303
	P1R55	553	0.727833	25.4959		9.4335
					average	11.1727
915R	Feature Name	Area Uncalibrated(pix^2)	Percent Area (%)	Diameter, Mean(pix)
	P2R2	303	0.593048	17.2351		6.37699
	P2R3	383	0.749628	21.0957		7.8054
	P2R4	435	0.851405	22.6829		8.39268
	P2R5	206	0.403194	14.8614		5.4987
	P2R6	516	1.00994	24.8317		9.18773
	P2R8	303	0.593048	18.412		6.81244
	P2R9	636	1.24481	27.6155		10.2177
	P2R10	528	1.03343	24.6175		9.10846
	P2R11	630	1.23307	27.8684		10.3113
	P2R12	449	0.878807	22.8458		8.45295
	P2R15	322	0.630236	18.6523		6.90134
	P2R22	633	1.23894	27.296		10.0995
	P2R23	698	1.36616	28.8248		10.6652
	P1R24	656	1.28396	27.4363		10.1514
					average	8.57014
						0
956R	Feature Name	Area Uncalibrated(pix^2)	Percent Area (%)	Diameter, Mean(pix)
	P1R2	726	1.05233	28.93		10.7041
	P1R4	783	1.13495	30.7572		11.3802
	P1R6	491	0.711697	24.4162		9.03399
	P1R10	796	1.15379	30.1484		11.1549
	P1R14	850	1.23206	31.3414		11.5963
	P1R16	532	0.771126	24.6439		9.11825
	P1R20	500	0.724743	23.8264		8.81578
	P1R26	938	1.35962	33.2005		12.2842
	P1R27	777	1.12625	28.819		10.663
	P1R28	770	1.1161	29.798		11.0252
	P1R31	911	1.32048	32.5997		12.0619
	P1R20	634	0.918974	27.1993		10.0637
					average	10.6585
45 day
1032L	P1R1	0.662901	17.9645	6.64685		311
	P1R2	0.801449	19.4183	7.18477		376
	P1R3	0.780134	21.0501	7.78853		366
	P1R7	1.4004	27.9269	10.333		657
	P1R8	1.49845	28.7075	10.6218		703
	P1R9	0.863263	21.5042	7.95656		405
	P1R11	0.933603	21.4084	7.92111		438
	P1R12	0.91442	20.3679	7.53611		429
	P1R14	0.443355	14.5416	5.38038		208
	P1R15	1.10626	24.6795	9.13142		519
	P1R16	0.901631	22.8368	8.44963		423
	P3	1.14462	25.2918	9.35797		537
	P4	0.869658	21.926	8.11262		408
	P5	2.22317	35.3384	13.0752		1043
	P8	1.35351	27.1082	10.03		635
	P9	0.705531	19.3639	7.16465		331
	PL10				845.66
				8.54316
	Feature Name	Percent Area (%)	Diameter, Mean(pix)		Length(pix)	Area(pix^2)
1035R	P1R1	0.584198	20.2005	7.47417		349
	P1R3	0.918982	24.6337	9.11445		549
	P1R4	0.768329	23.4852	8.68952		459
	P1R5	0.480415	18.2933	6.76852		287
	P1R7	0.716438	22.0189	8.14698		428
	P1R8	1.20522	28.826	10.6656		720
	P1R15	0.616003	21.0086	7.77319		368
	P1R24	0.726481	22.3769	8.27946		434
	P1R25	0.616003	21.4118	7.92237		368
	P1R26	0.654503	21.0758	7.79803		391
	P4	1.18514	29.2122	10.8085		708
	P5	0.579176	20.1337	7.44946		346
	P6	0.860395	24.807	9.17857		514
	P7	0.574155	20.0633	7.4234		343
	PL8				835.275
				8.39231
	Feature Name	Percent Area (%)	Diameter, Mean(pix)		Length(pix)	Area(pix^2)
1046R	P1R3	0.734232	20.8561	7.71675		376
	P1R7	0.913884	23.7776	8.79772		468
	P1R13	1.22632	27.0286	10.0006		628
	P1R18	1.06229	24.9746	9.2406		544
	P1R21	1.02128	24.6575	9.12326		523
	P1R25	1.01152	24.4267	9.03787		518
	P2	1.03495	24.5053	9.06694		530
	P3	0.867018	22.8728	8.46293		444
	P4	0.753759	21.3317	7.89275		386
	P6	1.32787	28.4139	10.5131		680
	P7	1.04667	25.1339	9.29954		536
	P9	1.08963	25.6548	9.49229		558
	P10	0.841632	22.3141	8.25622		431
	P11	1.39621	29.3661	10.8655		715
	P12	1.32396	27.901	10.3234		678
	P13	0.68346	19.8391	7.34046		350
	PL14				788.684
				9.08937
	Feature Name	Percent Area (%)	Diameter, Mean(pix)		Length(pix)	Area(pix^2)
1048R	P1R1	0.765791	24.1033	8.91821		488
	P1R3	0.638682	21.1687	7.83241		407
	P1R6	0.798745	24.1431	8.93296		509
	P1R10	0.888191	25.6966	9.50774		566
	P1R14	1.16124	29.4918	10.912		740
	P1R16	0.513142	19.0769	7.05846		327
	P1R20	0.552373	20.2704	7.50004		352
	P2	0.768929	24.0662	8.90449		490
	P3	0.637113	21.5446	7.9715		406
	P4	1.01373	27.7721	10.2757		646
	P5	0.806591	24.0887	8.9128		514
	P4	0.853668	25.0165	9.25609		544
	P5	1.01844	27.1651	10.0511		649
	P7	0.961946	26.9067	9.95548		613
	PL10				1079
				8.99921
	Feature Name	Percent Area (%)	Diameter, Mean(pix)		Length(pix)	Area(pix^2)
1066R	P1R4	0.715921	24.6954	9.13729		516
	P1R10	1.0281	29.2119	10.8084		741
	P1R11	0.944849	27.3566	10.1219		681
	P1R16	1.29865	32.9501	12.1915		936
	P1R18	1.26119	31.7668	11.7537		909
	P1R19	0.657648	24.1482	8.93483		474
	P1R20	1.19043	30.493	11.2824		858
	P1R21	1.17933	31.7107	11.733		850
	P1R22	1.18904	32.2698	11.9398		857
	P1R23	1.32778	33.1674	12.2719		957
	P1R26	0.831079	26.0321	9.63189		599
	P1R21	1.07666	30.2173	11.1804		776
	P1R22	0.849116	26.6651	9.86609		612
	P2	1.00173	29.4984	10.9144		722
	P3	0.785293	26.0041	9.6215		566
	P4	0.696497	24.0842	8.91114		502
	P5	0.946237	28.0343	10.3727		682
	P6	0.829691	26.7004	9.87916		598
	PL4				1012.8
				10.5862
	Feature Name	Percent Area (%)	Diameter, Mean(pix)		Length(pix)	Area(pix^2)
1070L	P1R1	1.07771	23.0328	8.52212		555
	P1R4	1.09325	26.4106	9.77192		563
	P1R5	2.01173	35.2766	13.0523		1036
	P1R8	1.20005	28.5915	10.5789		618
	P1R11	0.829158	22.1408	8.19208		427
	P1R14	0.887413	22.7481	8.41681		457
	P1R15	1.46413	29.8665	11.0506		754
	P1R16	1.85832	36.0027	13.321		957
	P2	1.1884	27.1675	10.052		612
	P3	0.930133	23.5246	8.70409		479
	P4	0.743718	21.1559	7.82769		383
	P6	1.33015	28.8275	10.6662		685
	P7	1.1282	26.2617	9.71683		581
	P4	1.03499	25.1579	9.30843		533
	P5	0.829158	22.5282	8.33543		427
	P6	0.621383	19.3442	7.15734		320
	P7	0.755369	21.1325	7.81902		389
	P8	0.662162	20.0245	7.40905		341
	PL10				828.242
				9.43899
	Feature Name	Percent Area (%)	Diameter, Mean(pix)		Length(pix)	Area(pix^2)
1051R	P1R1	1.43575	35.859	13.2678		1108
	P1R2	1.15975	32.6628	12.0852		895
	P1R3	1.12735	32.005	11.8418		870
	P1R4	1.2375	32.3788	11.9802		955
	P1R6	1.27507	33.6138	12.4371		984
	P1R9	1.15068	32.6436	12.0781		888
	P1R11	0.931685	29.1286	10.7776		719
	P1R12	0.897994	28.9069	10.6956		693
	P1R14	1.17918	32.9956	12.2084		910
	P1R17	1.00166	30.3675	11.236		773
	P1R19	1.11699	31.4376	11.6319		862
	P1R23	1.30229	34.6767	12.8304		1005
	P1R25	0.953714	32.2077	11.9169		736
	P1R24	0.527393	21.1302	7.81819		407
	P4	0.611621	23.745	8.78565		472
	P5	0.852641	28.0956	10.3954		658
	PL9				1119.3
				11.3741
	Feature Name	Percent Area (%)	Diameter, Mean(pix)		Length(pix)	Area(pix^2)
1052L	P1R1	0.853184	28.0657	10.3843		625
	P1R3	0.659341	23.7779	8.79782		483
	P1R7	0.809501	26.7074	9.88176		593
	P1R10	0.689373	24.4211	9.0358		505
	P1R18	0.986963	30.3397	11.2257		723
	P1R27	1.28592	33.1347	12.2599		942
	P1R30	0.64569	24.2426	8.96975		473
	P2	1.1849	32.3943	11.9859		868
	P3	0.488704	20.4755	7.57595		358
	P4	0.640229	23.4916	8.69191		469
	P5	0.546038	21.6975	8.02808		400
	P5	0.866835	27.0908	10.0236		635
	P6	0.610197	22.9853	8.50457		447
	P7	0.647055	23.5469	8.71236		474
	P8	0.696198	24.6456	9.11886		510
	P9	1.25589	33.0192	12.2171		920
	PL11				1060.16
				9.71333
	Feature Name	Percent Area (%)	Diameter, Mean(pix)		Length(pix)	Area(pix^2)
1053R	P1R1	0.540655	20.6793	7.65133		333
	P1R2	0.675412	24.8171	9.18231		416
	P1R3	0.590986	21.3129	7.88577		364
	P1R7	0.779322	22.6542	8.38204		480
	P1R8	0.675412	21.7335	8.04138		416
	P1R9	1.15275	28.9933	10.7275		710
	P1R12	0.905962	25.7786	9.53808		558
	P2	0.974152	26.8481	9.93381		600
	P3	0.847513	25.018	9.25665		522
	P4	0.651059	21.6995	8.02882		401
	P5	1.38979	32.2469	11.9314		856
	P6	0.964411	26.6447	9.85854		594
	P7	0.85076	24.8762	9.20418		524
	P8	1.24367	30.2984	11.2104		766
	P11	1.05371	27.9841	10.3541		649
	P12	1.17223	29.6621	10.975		722
	PL13				1064.58
				9.51008
	Feature Name	Percent Area (%)	Diameter, Mean(pix)		Length(pix)	Area(pix^2)
1054L	P1R2	1.26148	29.1161	10.773		720
	P1R5	0.550144	18.9135	6.99798		314
	P1R6	0.898802	24.1144	8.92232		513
	P1R13	0.770902	22.3139	8.25616		440
	P7	1.29301	29.6972	10.988		738
	P8	1.16687	28.1775	10.4257		666
	P9	0.697316	21.6501	8.01052		398
	P10	0.937347	24.8937	9.21068		535
	P11	1.38938	30.5745	11.3126		793
	P12	1.61714	32.9377	12.1869		923
	P13	1.39638	30.2485	11.192		797
	P14	1.10029	27.3575	10.1223		628
	P15	1.24571	28.7381	10.6331		711
	P16	1.07751	26.8581	9.93748		615
	P18	1.29652	29.4996	10.9149		740
	P19	1.09503	27.2157	10.0698		625
	P20	0.840984	23.3855	8.65262		480
	P21	0.870769	24.0788	8.90917		497
	P23	1.09678	26.8624	9.9391		626
	P26	0.958371	25.3305	9.37229		547
	P27	1.15285	28.0598	10.3821		658
	P28	0.874273	24.2253	8.96338		499
	P29	1.15285	27.9568	10.344		658
	PL30				1106.87
				9.84852
	Feature Name	Percent Area (%)	Diameter, Mean(pix)		Length(pix)	Area(pix^2)
1150L	P1R9	1.23871	31.5821	11.6854		728
	P1R15	0.946045	26.1419	9.67252		556
	P1R14	1.19617	28.9712	10.7193		703
	P2	0.946045	25.736	9.52232		556
	P3	1.42928	31.1524	11.5264		840
	P4	1.2319	28.9332	10.7053		724
	P5	1.06175	27.4495	10.1563		624
	P6	1.48372	32.4769	12.0164		872
	P7	0.757176	23.1307	8.55834		445
	P8	0.927328	25.5612	9.45765		545
	P9	1.04133	26.9283	9.96349		612
	P10	1.72534	34.9033	12.9142		1014
	P11	1.25912	29.6262	10.9617		740
	PL13				1014.01
				10.6046
	Feature Name	Percent Area (%)	Diameter, Mean(pix)		Length(pix)	Area(pix^2)
1160L	P1R2	1.00622	23.3796	8.65044		458
	P1R4	1.00841	23.3194	8.62819		459
	P1R7	1.31819	26.4929	9.80238		600
	P1R8	1.26107	27.279	10.0932		574
	P1R9	1.26107	25.8761	9.57415		574
	P1R21	1.40827	28.1777	10.4257		641
	P1R22	1.48296	28.3654	10.4952		675
	P2	2.11789	34.0673	12.6049		964
	P3	0.768943	20.1614	7.45971		350
	P4	2.11789	34.2467	12.6713		964
	P5	1.99706	32.6722	12.0887		909
	P6	1.28084	26.5658	9.82934		583
	P8	1.71584	30.8532	11.4157		781
	P9	1.00182	23.4985	8.69444		456
	P10	1.61478	29.5046	10.9167		735
	P12	0.856823	21.6125	7.99664		390
	P13	1.09849	24.2734	8.98117		500
	PL15			0	928.921
				10.0193
