# Supplementary material for: A novel, ataxic mouse model of ataxia telangiectasia caused by a clinically relevant nonsense mutation
Source: eLife journal article supplement (doi:10.7554/elife.64695), 2021-11-01
Supplement: fig5-data1 [file Soma size.xlsx]

## Sheet: Sheet1
561_001	Type	Result	Comments		562_001	Type	Result	Comments		568_001	Type	Result	Comments		798_001	Type	Result	Comments		799_001	Type	Result	Comments		800_001	Type	Result	Comments		837_001	Type	Result	Comments		917_001	Type	Result	Comments		891_001	Type	Result	Comments		915_001	Type	Result	Comments
	Line Length (µm)	14.4101				Line Length (µm)	16.9383				Line Length (µm)	15.191				Line Length (µm)	15.9002				Line Length (µm)	19.2394				Line Length (µm)	19.4641				Line Length (µm)	13.8137				Line Length (µm)	18.8945			.	Line Length (µm)	17.4296				Line Length (µm)	17.6366
	Line Length (µm)	14.341				Line Length (µm)	19.0591				Line Length (µm)	14.9675				Line Length (µm)	18.9999				Line Length (µm)	18.5256				Line Length (µm)	18.7831				Line Length (µm)	17.3702				Line Length (µm)	17.4366				Line Length (µm)	12.6685				Line Length (µm)	15.4658
	Line Length (µm)	15.1125				Line Length (µm)	11.7246				Line Length (µm)	11.7415				Line Length (µm)	18.4455				Line Length (µm)	15.8168				Line Length (µm)	15.6709				Line Length (µm)	15.6078				Line Length (µm)	19.0292				Line Length (µm)	17.7036				Line Length (µm)	16.6536
	Line Length (µm)	19.8842				Line Length (µm)	13.1983				Line Length (µm)	14.3641				Line Length (µm)	17.6818				Line Length (µm)	19.858				Line Length (µm)	15.7119				Line Length (µm)	14.2103				Line Length (µm)	17.8802				Line Length (µm)	12.9056				Line Length (µm)	17.4491
	Line Length (µm)	10.6754				Line Length (µm)	22.0715				Line Length (µm)	12.0587				Line Length (µm)	13.9996				Line Length (µm)	17.7976				Line Length (µm)	22.2888				Line Length (µm)	14.1974				Line Length (µm)	16.0076				Line Length (µm)	14.1425				Line Length (µm)	18.9065
	Line Length (µm)	18.107				Line Length (µm)	14.7045				Line Length (µm)	14.9498				Line Length (µm)	13.4107				Line Length (µm)	17.4368				Line Length (µm)	18.9992				Line Length (µm)	13.9972				Line Length (µm)	19.0756				Line Length (µm)	17.0822				Line Length (µm)	18.7755
	Line Length (µm)	16.812				Line Length (µm)	14.4023				Line Length (µm)	16.7888				Line Length (µm)	16.908				Line Length (µm)	18.4158				Line Length (µm)	18.1391				Line Length (µm)	13.4831				Line Length (µm)	21.6255				Line Length (µm)	13.4005				Line Length (µm)	20.1168
	Line Length (µm)	16.0667				Line Length (µm)	15.4437				Line Length (µm)	18.9619				Line Length (µm)	18.2114				Line Length (µm)	16.2538				Line Length (µm)	15.5221				Line Length (µm)	16.3211				Line Length (µm)	17.1348				Line Length (µm)	16.4407				Line Length (µm)	17.7865
	Line Length (µm)	16.8337				Line Length (µm)	13.6992				Line Length (µm)	12.8274				Line Length (µm)	18.7384				Line Length (µm)	18.6278				Line Length (µm)	14.901				Line Length (µm)	13.5391				Line Length (µm)	14.9891				Line Length (µm)	12.9058				Line Length (µm)	14.7954
	Line Length (µm)	15.807				Line Length (µm)	15.9871				Line Length (µm)	14.1431				Line Length (µm)	18.5959				Line Length (µm)	20.2752				Line Length (µm)	19.9341				Line Length (µm)	12.752				Line Length (µm)	13.9103				Line Length (µm)	12.8255				Line Length (µm)	16.3332
	Line Length (µm)	14.3517				Line Length (µm)	14.5066				Line Length (µm)	17.0734				Line Length (µm)	17.1647				Line Length (µm)	21.9769				Line Length (µm)	16.1421				Line Length (µm)	14.1427				Line Length (µm)	15.837				Line Length (µm)	15.3697				Line Length (µm)	17.9445
	Line Length (µm)	13.7786				Line Length (µm)	15.9327				Line Length (µm)	12.8656				Line Length (µm)	15.2674				Line Length (µm)	18.5035				Line Length (µm)	20.0189				Line Length (µm)	13.0553				Line Length (µm)	15.837				Line Length (µm)	14.0014				Line Length (µm)	17.2806
	Line Length (µm)	21.2506				Line Length (µm)	14.6877				Line Length (µm)	13.9561				Line Length (µm)	13.3827				Line Length (µm)	14.9477				Line Length (µm)	15.5701				Line Length (µm)	16.1698				Line Length (µm)	13.0218				Line Length (µm)	14.0846				Line Length (µm)	18.7755
	Line Length (µm)	13.9198				Line Length (µm)	16.0165				Line Length (µm)	12.829				Line Length (µm)	17.0471				Line Length (µm)	12.3848				Line Length (µm)	21.0924				Line Length (µm)	15.5368				Line Length (µm)	17.0006				Line Length (µm)	13.9099				Line Length (µm)	19.077
	Line Length (µm)	15.6136				Line Length (µm)	17.6462				Line Length (µm)	16.2716				Line Length (µm)	12.6846				Line Length (µm)	14.946				Line Length (µm)	17.3477				Line Length (µm)	15.1354				Line Length (µm)	12.5697				Line Length (µm)	15.0994				Line Length (µm)	14.9319
	Line Length (µm)	11.055				Line Length (µm)	18.8298				Line Length (µm)	12.8312				Line Length (µm)	12.9124				Line Length (µm)	16.9413				Line Length (µm)	19.3377				Line Length (µm)	15.7016				Line Length (µm)	15.4115				Line Length (µm)	14.1975				Line Length (µm)	15.267
		15.5012				Line Length (µm)	11.4193				Line Length (µm)	14.9211				Line Length (µm)	13.0782				Line Length (µm)	18.1613				Line Length (µm)	17.8857				Line Length (µm)	14.6953				Line Length (µm)	16.9674				Line Length (µm)	16.3337				Line Length (µm)	14.9892
561_002						Line Length (µm)	16.3061				Line Length (µm)	11.5722				Line Length (µm)	18.244				Line Length (µm)	15.2339				Line Length (µm)	21.5294				Line Length (µm)	14.6953				Line Length (µm)	17.6842				Line Length (µm)	12.7499				Line Length (µm)	15.0967
	Type	Result	Comments			Line Length (µm)	14.0926				Line Length (µm)	14.3828				Line Length (µm)	16.0077				Line Length (µm)	13.0091				Line Length (µm)	20.0444					14.6902				Line Length (µm)	20.3302				Line Length (µm)	14.6421				Line Length (µm)	20.9937
	Line Length (µm)	14.4101				Line Length (µm)	15.163				Line Length (µm)	16.7393				Line Length (µm)	13.2022				Line Length (µm)	11.3369				Line Length (µm)	18.4553									Line Length (µm)	20.6704				Line Length (µm)	15.9486				Line Length (µm)	16.4404
	Line Length (µm)	14.341				Line Length (µm)	12.6092				Line Length (µm)	15.8564				Line Length (µm)	15.1036				Line Length (µm)	15.1281				Line Length (µm)	19.2114									Line Length (µm)	19.2333				Line Length (µm)	13.8139				Line Length (µm)	18.9231
	Line Length (µm)	15.1125				Line Length (µm)	12.2519				Line Length (µm)	16.1988				Line Length (µm)	20.3833				Line Length (µm)	14.1086				Line Length (µm)	18.1829			837_002	Type	Result	Comments			Line Length (µm)	15.0656				Line Length (µm)	14.6028				Line Length (µm)	20.6055
	Line Length (µm)	19.8842				Line Length (µm)	12.5487					14.6132				Line Length (µm)	18.6372				Line Length (µm)	19.7662				Line Length (µm)	20.9886				Line Length (µm)	13.274				Line Length (µm)	16.7333				Line Length (µm)	13.8776				Line Length (µm)	15.131
	Line Length (µm)	10.6754				Line Length (µm)	15.9805									Line Length (µm)	12.6354				Line Length (µm)	19.4936				Line Length (µm)	20.0115				Line Length (µm)	11.5199				Line Length (µm)	15.7837				Line Length (µm)	12.9606				Line Length (µm)	18.4937
	Line Length (µm)	18.107				Line Length (µm)	14.4392			568_002	Type	Result	Comments			Line Length (µm)	14.3566				Line Length (µm)	23.5596				Line Length (µm)	21.7302				Line Length (µm)	13.8147				Line Length (µm)	23.2329				Line Length (µm)	15.3491				Line Length (µm)	18.4073
	Line Length (µm)	16.812				Line Length (µm)	15.3647				Line Length (µm)	15.5502				Line Length (µm)	15.8573				Line Length (µm)	18.7885				Line Length (µm)	16.293				Line Length (µm)	11.8852				Line Length (µm)	21.7451				Line Length (µm)	18.0524				Line Length (µm)	17.0134
	Line Length (µm)	16.0667				Line Length (µm)	12.7568				Line Length (µm)	17.1844					16.0329				Line Length (µm)	22.0264				Line Length (µm)	19.5261				Line Length (µm)	16.1996				Line Length (µm)	19.6064				Line Length (µm)	11.2225				Line Length (µm)	15.6503
	Line Length (µm)	16.8337				Line Length (µm)	13.9137				Line Length (µm)	11.4899										17.5022				Line Length (µm)	18.6327				Line Length (µm)	14.8162				Line Length (µm)	23.5858				Line Length (µm)	14.5787				Line Length (µm)	14.2818
	Line Length (µm)	15.807				Line Length (µm)	18.5672				Line Length (µm)	16.3245			798_002	Type	Result	Comments								Line Length (µm)	18.7342				Line Length (µm)	16.4642					17.725				Line Length (µm)	21.3811				Line Length (µm)	18.0684
	Line Length (µm)	14.3517				Line Length (µm)	16.3866				Line Length (µm)	21.9751				Line Length (µm)	19.4347			799_002	Type	Result	Comments			Line Length (µm)	19.267				Line Length (µm)	15.8892									Line Length (µm)	10.9426				Line Length (µm)	16.8635
	Line Length (µm)	13.7786				Line Length (µm)	13.0056				Line Length (µm)	15.3715				Line Length (µm)	17.7183				Line Length (µm)	22.155				Line Length (µm)	18.6027				Line Length (µm)	16.1457									Line Length (µm)	17.636				Line Length (µm)	16.4815
	Line Length (µm)	21.2506				Line Length (µm)	16.5705				Line Length (µm)	12.7111				Line Length (µm)	15.7721				Line Length (µm)	18.5856				Line Length (µm)	17.6764				Line Length (µm)	12.9213			917_002	Type	Result	Comments			Line Length (µm)	18.2329				Line Length (µm)	17.9696
	Line Length (µm)	13.9198				Line Length (µm)	11.272				Line Length (µm)	12.8251				Line Length (µm)	17.6298				Line Length (µm)	16.2677				Line Length (µm)	20.2082				Line Length (µm)	17.3388				Line Length (µm)	15.8199				Line Length (µm)	12.5132				Line Length (µm)	18.0365
	Line Length (µm)	15.6136				Line Length (µm)	13.0162				Line Length (µm)	13.087				Line Length (µm)	16.2705				Line Length (µm)	14.6197				Line Length (µm)	22.364				Line Length (µm)	20.2758				Line Length (µm)	17.2634				Line Length (µm)	17.6145				Line Length (µm)	21.3887
	Line Length (µm)	11.055				Line Length (µm)	13.6861				Line Length (µm)	14.5091				Line Length (µm)	19.5027				Line Length (µm)	21.0491				Line Length (µm)	25.4742				Line Length (µm)	16.2344				Line Length (µm)	19.2049				Line Length (µm)	15.8155				Line Length (µm)	23.12
	Line Length (µm)	16.0977					14.9771				Line Length (µm)	15.9836				Line Length (µm)	19.1979				Line Length (µm)	16.0402				Line Length (µm)	17.3853				Line Length (µm)	14.0107				Line Length (µm)	15.5374				Line Length (µm)	14.2235				Line Length (µm)	23.1977
	Line Length (µm)	13.0162									Line Length (µm)	14.3641				Line Length (µm)	18.0775				Line Length (µm)	25.8047				Line Length (µm)	20.3316				Line Length (µm)	13.5669				Line Length (µm)	17.3785				Line Length (µm)	12.6992				Line Length (µm)	19.2934
	Line Length (µm)	16.0357									Line Length (µm)	18.1362				Line Length (µm)	14.8825				Line Length (µm)	14.9153					18.9583				Line Length (µm)	16.0523				Line Length (µm)	16.4226				Line Length (µm)	14.0278				Line Length (µm)	21.0971
	Line Length (µm)	15.4831			562_002	Type	Result	Comments			Line Length (µm)	16.0311				Line Length (µm)	14.214				Line Length (µm)	13.7142									Line Length (µm)	16.7896				Line Length (µm)	17.758				Line Length (µm)	15.8738				Line Length (µm)	17.274
	Line Length (µm)	17.9807				Line Length (µm)	15.1408				Line Length (µm)	17.8357				Line Length (µm)	17.8169				Line Length (µm)	15.3926			800_002	Type	Result	Comments			Line Length (µm)	16.2188				Line Length (µm)	17.6708				Line Length (µm)	13.8156				Line Length (µm)	16.2552
	Line Length (µm)	15.4567				Line Length (µm)	16.5975				Line Length (µm)	15.3135				Line Length (µm)	12.4342				Line Length (µm)	15.1923				Line Length (µm)	17.8301				Line Length (µm)	14.7934				Line Length (µm)	18.2148				Line Length (µm)	12.5298				Line Length (µm)	21.9082
	Line Length (µm)	16.9228				Line Length (µm)	14.4361				Line Length (µm)	13.9079				Line Length (µm)	18.3936				Line Length (µm)	19.171				Line Length (µm)	19.5749				Line Length (µm)	21.8307				Line Length (µm)	18.1138				Line Length (µm)	15.53				Line Length (µm)	24.3198
	Line Length (µm)	16.1415				Line Length (µm)	14.7375				Line Length (µm)	14.5002				Line Length (µm)	14.3573				Line Length (µm)	11.7781				Line Length (µm)	17.4539				Line Length (µm)	16.7128				Line Length (µm)	20.9137				Line Length (µm)	14.7477				Line Length (µm)	19.077
	Line Length (µm)	13.796				Line Length (µm)	19.3461				Line Length (µm)	15.1897				Line Length (µm)	20.9414				Line Length (µm)	18.679				Line Length (µm)	19.2274				Line Length (µm)	14.3909				Line Length (µm)	18.9228				Line Length (µm)	15.3583				Line Length (µm)	18.9142
	Line Length (µm)	15.1446				Line Length (µm)	12.9061				Line Length (µm)	12.1727				Line Length (µm)	19.8305				Line Length (µm)	18.7276				Line Length (µm)	18.8751				Line Length (µm)	20.0521				Line Length (µm)	17.2498					14.8009				Line Length (µm)	18.1866
	Line Length (µm)	16.9722				Line Length (µm)	16.5067				Line Length (µm)	17.4417				Line Length (µm)	17.6816				Line Length (µm)	19.9065				Line Length (µm)	15.0169				Line Length (µm)	15.1478				Line Length (µm)	16.143										18.1039
	Line Length (µm)	12.7563				Line Length (µm)	13.5325				Line Length (µm)	16.2982				Line Length (µm)	21.1243				Line Length (µm)	15.9025				Line Length (µm)	17.4775				Line Length (µm)	16.4424				Line Length (µm)	19.1401
	Line Length (µm)	11.9539				Line Length (µm)	20.6637				Line Length (µm)	14.2633				Line Length (µm)	19.7097				Line Length (µm)	18.0732				Line Length (µm)	13.562				Line Length (µm)	18.4534				Line Length (µm)	17.5673			891_002	Type	Result	Comments		915_002	Type	Result	Comments
	Line Length (µm)	18.5093				Line Length (µm)	10.9729				Line Length (µm)	14.1644				Line Length (µm)	14.8094				Line Length (µm)	15.2589				Line Length (µm)	17.5494				Line Length (µm)	15.6449				Line Length (µm)	16.9646				Line Length (µm)	18.2809				Line Length (µm)	19.7522
	Line Length (µm)	15.8582				Line Length (µm)	15.5717					15.2763				Line Length (µm)	19.0057				Line Length (µm)	16.7496				Line Length (µm)	18.0055				Line Length (µm)	17.3198				Line Length (µm)	15.4542				Line Length (µm)	14.8255				Line Length (µm)	16.5514
	Line Length (µm)	16.0955				Line Length (µm)	14.6877									Line Length (µm)	19.5856				Line Length (µm)	13.9202				Line Length (µm)	13.8293				Line Length (µm)	13.3534				Line Length (µm)	16.3118				Line Length (µm)	15.2021				Line Length (µm)	16.749
	Line Length (µm)	17.4151				Line Length (µm)	15.8467			568_003	Type	Result	Comments			Line Length (µm)	21.5834					17.2335				Line Length (µm)	15.0429				Line Length (µm)	14.8354				Line Length (µm)	14.3109				Line Length (µm)	16.1699				Line Length (µm)	16.749
	Line Length (µm)	18.6156				Line Length (µm)	17.2505				Line Length (µm)	12.6354				Line Length (µm)	19.9448									Line Length (µm)	16.0555				Line Length (µm)	15.7983				Line Length (µm)	20.5572				Line Length (µm)	15.0918				Line Length (µm)	17.274
	Line Length (µm)	15.6121				Line Length (µm)	16.2607				Line Length (µm)	16.2024				Line Length (µm)	19.4485									Line Length (µm)	14.2474					15.7481				Line Length (µm)	18.4884				Line Length (µm)	12.6719				Line Length (µm)	15.1895
	Line Length (µm)	13.1589				Line Length (µm)	14.1819				Line Length (µm)	17.6885				Line Length (µm)	16.4846			799_003	Type	Result	Comments			Line Length (µm)	18.0258									Line Length (µm)	14.4326				Line Length (µm)	13.6845				Line Length (µm)	19.8424
	Line Length (µm)	13.0198				Line Length (µm)	14.8619				Line Length (µm)	13.5644				Line Length (µm)	17.0952				Line Length (µm)	22.9603				Line Length (µm)	20.2258									Line Length (µm)	19.5899				Line Length (µm)	13.274				Line Length (µm)	15.8228
		15.5151				Line Length (µm)	15.9836				Line Length (µm)	16.2483				Line Length (µm)	16.9234				Line Length (µm)	20.6087				Line Length (µm)	17.2041				Type	Result	Comments			Line Length (µm)	19.0262				Line Length (µm)	15.3066				Line Length (µm)	15.0162
						Line Length (µm)	14.4731				Line Length (µm)	12.3056				Line Length (µm)	16.2816				Line Length (µm)	17.3047				Line Length (µm)	13.2799			837_003	Line Length (µm)	15.9989				Line Length (µm)	20.2616				Line Length (µm)	11.7327				Line Length (µm)	17.1738
561_003	Type	Result	Comments			Line Length (µm)	13.4525				Line Length (µm)	17.1235				Line Length (µm)	18.9768				Line Length (µm)	17.6502				Line Length (µm)	20.8928				Line Length (µm)	13.4681				Line Length (µm)	17.9578				Line Length (µm)	15.6994				Line Length (µm)	13.8338
	Line Length (µm)	15.8224				Line Length (µm)	12.401				Line Length (µm)	21.2877				Line Length (µm)	16.7469				Line Length (µm)	24.2464				Line Length (µm)	19.8359				Line Length (µm)	16.2185				Line Length (µm)	17.4349				Line Length (µm)	15.4572				Line Length (µm)	13.0191
	Line Length (µm)	16.5406				Line Length (µm)	13.5664				Line Length (µm)	15.9887				Line Length (µm)	16.2763				Line Length (µm)	21.8682				Line Length (µm)	17.9239				Line Length (µm)	17.9291				Line Length (µm)	14.0014				Line Length (µm)	16.0014				Line Length (µm)	21.2374
	Line Length (µm)	20.2596				Line Length (µm)	13.7331				Line Length (µm)	13.4764				Line Length (µm)	17.0058				Line Length (µm)	20.0076				Line Length (µm)	17.2329				Line Length (µm)	14.3207				Line Length (µm)	18.6145				Line Length (µm)	14.7089				Line Length (µm)	16.5986
	Line Length (µm)	15.8284				Line Length (µm)	13.1414				Line Length (µm)	23.0964					17.732				Line Length (µm)	15.8554				Line Length (µm)	20.3004				Line Length (µm)	16.9657				Line Length (µm)	19.0257				Line Length (µm)	19.5657				Line Length (µm)	13.6845
	Line Length (µm)	17.5997				Line Length (µm)	13.2217				Line Length (µm)	15.5472									Line Length (µm)	15.1721				Line Length (µm)	18.1243				Line Length (µm)	13.6847					17.6049				Line Length (µm)	15.9315				Line Length (µm)	16.0522
	Line Length (µm)	20.7289				Line Length (µm)	16.284				Line Length (µm)	15.3044									Line Length (µm)	19.754				Line Length (µm)	19.0684				Line Length (µm)	15.6388									Line Length (µm)	13.673				Line Length (µm)	15.8287
	Line Length (µm)	14.5088				Line Length (µm)	13.4606				Line Length (µm)	13.3177			798_003	Type	Result	Comments			Line Length (µm)	18.9869				Line Length (µm)	21.701				Line Length (µm)	15.643									Line Length (µm)	19.9544				Line Length (µm)	20.5702
	Line Length (µm)	17.8258				Line Length (µm)	14.9003				Line Length (µm)	15.3217				Line Length (µm)	15.3326				Line Length (µm)	23.2919				Line Length (µm)	21.4399				Line Length (µm)	14.3843			917_003	Type	Result	Comments			Line Length (µm)	19.6431				Line Length (µm)	17.2599
	Line Length (µm)	14.5529				Line Length (µm)	13.6013				Line Length (µm)	18.1318				Line Length (µm)	15.7119				Line Length (µm)	18.6471				Line Length (µm)	16.9904				Line Length (µm)	14.8111				Line Length (µm)	17.3139				Line Length (µm)	16.7318				Line Length (µm)	15.9313
	Line Length (µm)	12.8621				Line Length (µm)	9.8468				Line Length (µm)	14.0212				Line Length (µm)	16.3185				Line Length (µm)	21.3329				Line Length (µm)	21.4224				Line Length (µm)	11.443				Line Length (µm)	17.6963				Line Length (µm)	16.5588				Line Length (µm)	16.5514
	Line Length (µm)	17.3757				Line Length (µm)	11.3224				Line Length (µm)	14.9211				Line Length (µm)	18.525				Line Length (µm)	18.1353					17.8419				Line Length (µm)	15.7101				Line Length (µm)	17.5438				Line Length (µm)	18.3266				Line Length (µm)	13.8366
	Line Length (µm)	16.2286				Line Length (µm)	11.9075				Line Length (µm)	16.2651				Line Length (µm)	15.6894				Line Length (µm)	16.5717									Line Length (µm)	13.3251				Line Length (µm)	16.0366				Line Length (µm)	14.7089				Line Length (µm)	20.2971
	Line Length (µm)	13.9198				Line Length (µm)	14.8144				Line Length (µm)	12.5694				Line Length (µm)	17.8913				Line Length (µm)	20.4531			800_003	Type	Result	Comments			Line Length (µm)	15.5995				Line Length (µm)	19.1316				Line Length (µm)	14.4966				Line Length (µm)	12.5039
	Line Length (µm)	18.9297					14.5337				Line Length (µm)	19.0298				Line Length (µm)	15.3443				Line Length (µm)	22.3892				Line Length (µm)	18.8458				Line Length (µm)	17.0357				Line Length (µm)	15.4887				Line Length (µm)	15.7417				Line Length (µm)	16.1328
	Line Length (µm)	15.0229									Line Length (µm)	17.28				Line Length (µm)	14.7525					19.7353				Line Length (µm)	21.2877				Line Length (µm)	15.3248				Line Length (µm)	15.068				Line Length (µm)	14.4965				Line Length (µm)	18.2552
	Line Length (µm)	15.7258									Line Length (µm)	16.7892				Line Length (µm)	16.5409									Line Length (µm)	17.3683				Line Length (µm)	15.3581				Line Length (µm)	14.2952				Line Length (µm)	14.3792				Line Length (µm)	20.5589
	Line Length (µm)	12.5135			562_003	Type	Result	Comments			Line Length (µm)	15.9931				Line Length (µm)	16.3067									Line Length (µm)	15.8623				Line Length (µm)	12.8739				Line Length (µm)	15.4483				Line Length (µm)	16.3576				Line Length (µm)	20.049
	Line Length (µm)	11.9977				Line Length (µm)	15.5725				Line Length (µm)	14.9344				Line Length (µm)	17.1474									Line Length (µm)	22.71				Line Length (µm)	15.5078				Line Length (µm)	17.272				Line Length (µm)	13.888				Line Length (µm)	17.4334
	Line Length (µm)	18.3963				Line Length (µm)	9.47761					15.9617				Line Length (µm)	17.4433									Line Length (µm)	18.7569				Line Length (µm)	15.4639				Line Length (µm)	14.7615				Line Length (µm)	12.7247				Line Length (µm)	16.9389
	Line Length (µm)	12.294				Line Length (µm)	10.7174									Line Length (µm)	16.7888									Line Length (µm)	20.4998				Line Length (µm)	9.80434				Line Length (µm)	18.5427				Line Length (µm)	11.6826				Line Length (µm)	19.515
	Line Length (µm)	13.1364				Line Length (µm)	20.1432									Line Length (µm)	14.3158									Line Length (µm)	21.5743				Line Length (µm)	18.0954				Line Length (µm)	16.4318				Line Length (µm)	18.3249				Line Length (µm)	20.4249
	Line Length (µm)	13.3108				Line Length (µm)	15.512									Line Length (µm)	17.0024									Line Length (µm)	15.6157				Line Length (µm)	17.6507				Line Length (µm)	16.7705				Line Length (µm)	20.1581				Line Length (µm)	20.5449
	Line Length (µm)	16.0165				Line Length (µm)	14.436									Line Length (µm)	14.0592									Line Length (µm)	16.4677				Line Length (µm)	17.3799				Line Length (µm)	13.3224				Line Length (µm)	12.0659				Line Length (µm)	18.801
	Line Length (µm)	15.5717				Line Length (µm)	12.311									Line Length (µm)	15.8835									Line Length (µm)	16.8301				Line Length (µm)	16.6544				Line Length (µm)	18.424					15.5152				Line Length (µm)	18.9493
	Line Length (µm)	18.0368				Line Length (µm)	13.7323									Line Length (µm)	12.6427									Line Length (µm)	17.4122				Line Length (µm)	12.8839				Line Length (µm)	17.2926									Line Length (µm)	17.5924
		15.8002				Line Length (µm)	19.3805									Line Length (µm)	17.3683									Line Length (µm)	15.7768				Line Length (µm)	17.6968				Line Length (µm)	17.2396									Line Length (µm)	15.3534
						Line Length (µm)	14.6863									Line Length (µm)	19.9995									Line Length (µm)	18.5997				Line Length (µm)	14.818				Line Length (µm)	15.9903			891_003	Type	Result	Comments			Line Length (µm)	17.4695
						Line Length (µm)	14.9986									Line Length (µm)	15.3524									Line Length (µm)	17.5425				Line Length (µm)	16.1137				Line Length (µm)	17.1283				Line Length (µm)	12.5297				Line Length (µm)	14.3909
						Line Length (µm)	18.9292									Line Length (µm)	18.1362									Line Length (µm)	20.2331				Line Length (µm)	14.35				Line Length (µm)	19.6633				Line Length (µm)	15.1029				Line Length (µm)	17.5139
						Line Length (µm)	11.7415									Line Length (µm)	15.3531									Line Length (µm)	14.9473				Line Length (µm)	14.313				Line Length (µm)	21.3876				Line Length (µm)	14.051				Line Length (µm)	19.1096
						Line Length (µm)	12.5054									Line Length (µm)	18.952									Line Length (µm)	24.8021				Line Length (µm)	14.6055				Line Length (µm)	18.1906				Line Length (µm)	13.0104				Line Length (µm)	16.7841
						Line Length (µm)	22.6489									Line Length (µm)	18.6333									Line Length (µm)	18.6343				Line Length (µm)	16.3558				Line Length (µm)	15.686				Line Length (µm)	11.0369					17.2177
						Line Length (µm)	16.0555									Line Length (µm)	18.226									Line Length (µm)	20.2293				Line Length (µm)	15.3697				Line Length (µm)	22.4374				Line Length (µm)	13.8554
						Line Length (µm)	15.3471									Line Length (µm)	16.6693									Line Length (µm)	26.8909				Line Length (µm)	28.1249					17.1425				Line Length (µm)	14.8615			915_003	Type	Result	Comments
						Line Length (µm)	14.1131									Line Length (µm)	19.7118									Line Length (µm)	13.4116				Line Length (µm)	17.3383									Line Length (µm)	14.9927				Line Length (µm)	19.6204
						Line Length (µm)	15.8835									Line Length (µm)	15.7128									Line Length (µm)	17.4476				Line Length (µm)	15.2671									Line Length (µm)	17.0848				Line Length (µm)	19.6587
						Line Length (µm)	13.7422									Line Length (µm)	18.7991									Line Length (µm)	21.9975				Line Length (µm)	16.3143									Line Length (µm)	15.9635				Line Length (µm)	16.6022
						Line Length (µm)	14.7531										16.687									Line Length (µm)	17.8245				Line Length (µm)	15.1895									Line Length (µm)	13.9464				Line Length (µm)	18.0953
						Line Length (µm)	16.0182																			Line Length (µm)	20.1193				Line Length (µm)	15.4891									Line Length (µm)	15.3493				Line Length (µm)	15.8224
						Line Length (µm)	14.3547																			Line Length (µm)	19.6912				Line Length (µm)	12.9838									Line Length (µm)	14.6603				Line Length (µm)	16.9705
						Line Length (µm)	12.9067																			Line Length (µm)	22.868				Line Length (µm)	17.8228									Line Length (µm)	18.7352				Line Length (µm)	20.8152
						Line Length (µm)	16.0848																			Line Length (µm)	15.8241					15.6122									Line Length (µm)	18.1313				Line Length (µm)	17.1799
							15.042																			Line Length (µm)	21.7813														Line Length (µm)	11.342				Line Length (µm)	15.6201
																										Line Length (µm)	15.0581														Line Length (µm)	17.274				Line Length (µm)	17.4455
																											18.9326														Line Length (µm)	17.9951				Line Length (µm)	17.0231
																																									Line Length (µm)	18.9977				Line Length (µm)	14.6751
																																									Line Length (µm)	12.8802				Line Length (µm)	21.7266
																																									Line Length (µm)	19.7893				Line Length (µm)	17.2838
																																									Line Length (µm)	16.7966				Line Length (µm)	17.0445
																																									Line Length (µm)	13.5426				Line Length (µm)	18.0965
																																									Line Length (µm)	16.1629				Line Length (µm)	15.2828
																																									Line Length (µm)	16.1585				Line Length (µm)	15.0087
																																										15.37				Line Length (µm)	15.1555
																																														Line Length (µm)	20.2972
																																														Line Length (µm)	17.4204
																																														Line Length (µm)	13.6152
																																														Line Length (µm)	19.3261
																																														Line Length (µm)	15.7441
																																														Line Length (µm)	16.7841
																																														Line Length (µm)	16.749
561	15.6055		798	16.8173																																										Line Length (µm)	15.6951
562	14.8509		799	18.157																																										Line Length (µm)	16.2842
568	15.2837		800	18.5776																																										Line Length (µm)	14.0513
837	15.3502		917	17.4908																																										Line Length (µm)	19.0439
891	15.2287		915	17.7876																																										Line Length (µm)	16.9454
																																														Line Length (µm)	15.1676
		0.000441109																																												Line Length (µm)	16.052
																																														Line Length (µm)	13.4011
																																														Line Length (µm)	11.8763
																																														Line Length (µm)	16.4878
																																														Line Length (µm)	16.7705
																																														Line Length (µm)	17.1617
																																														Line Length (µm)	19.3008
																																														Line Length (µm)	17.128
																																														Line Length (µm)	25.0607
																																														Line Length (µm)	21.4063
																																														Line Length (µm)	17.9592
																																														Line Length (µm)	22.3176
																																														Line Length (µm)	19.5171
																																														Line Length (µm)	17.1792
																																														Line Length (µm)	20.6421
																																														Line Length (µm)	20.6528
																																														Line Length (µm)	18.2597
																																														Line Length (µm)	16.1448
																																															17.4714
