# Supplementary material for: A novel, ataxic mouse model of ataxia telangiectasia caused by a clinically relevant nonsense mutation
Source: eLife journal article supplement (doi:10.7554/elife.64695), 2021-11-01

Panel 1

- 1) Wildtype
- 2) *Atm*<sup>R35X/R35X</sup>
- 3) *Atm*<sup>R35X/R35X</sup> (G418)
- 4) *Atm*<sup>R35X/R35X</sup> (GJ103)

Panel image

Tech. replicate      1    2    3    4

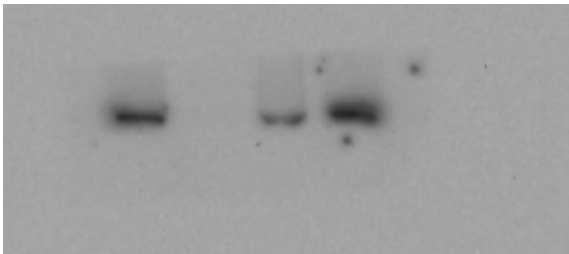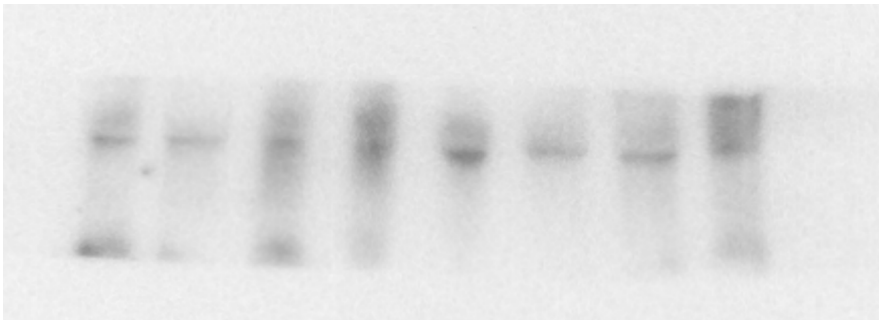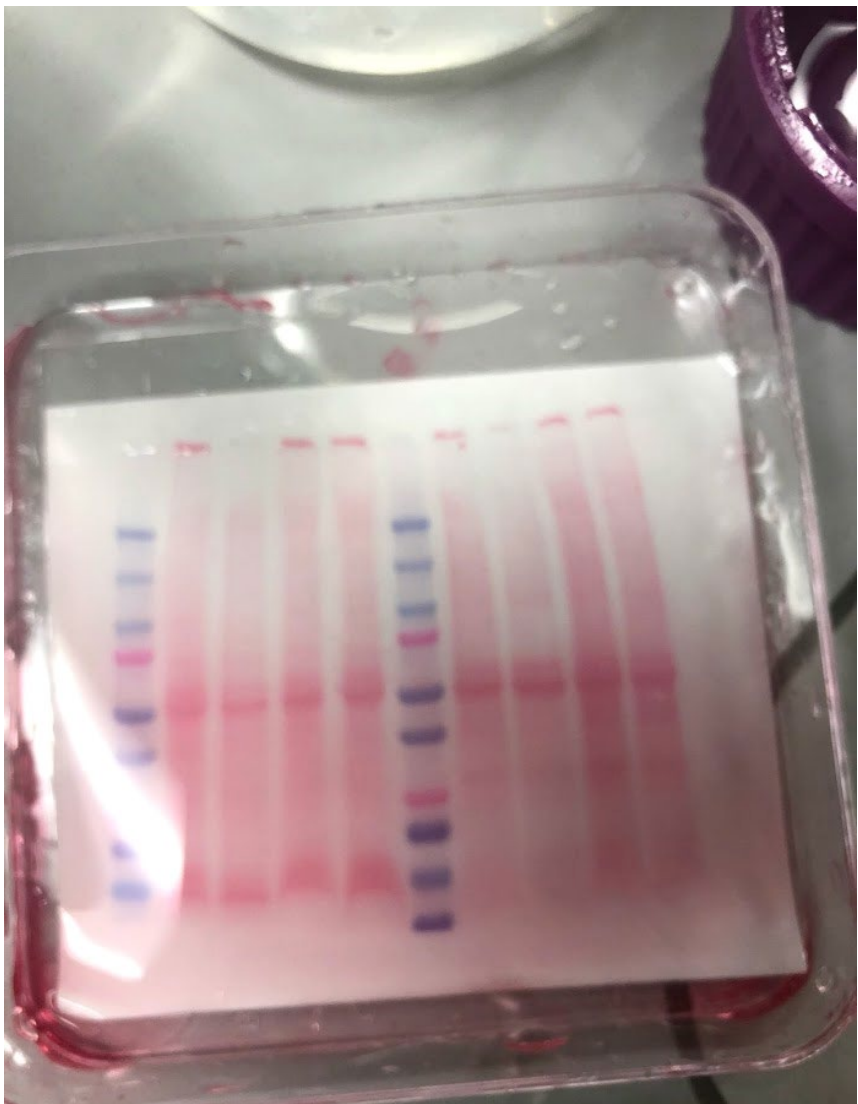

Panel 2

Panel image

- 1) Wildtype  
2) *Atm*<sup>R35X/R35X</sup>  
3) *Atm*<sup>R35X/R35X</sup> (G418)  
4) *Atm*<sup>R35X/R35X</sup> (GJ103)

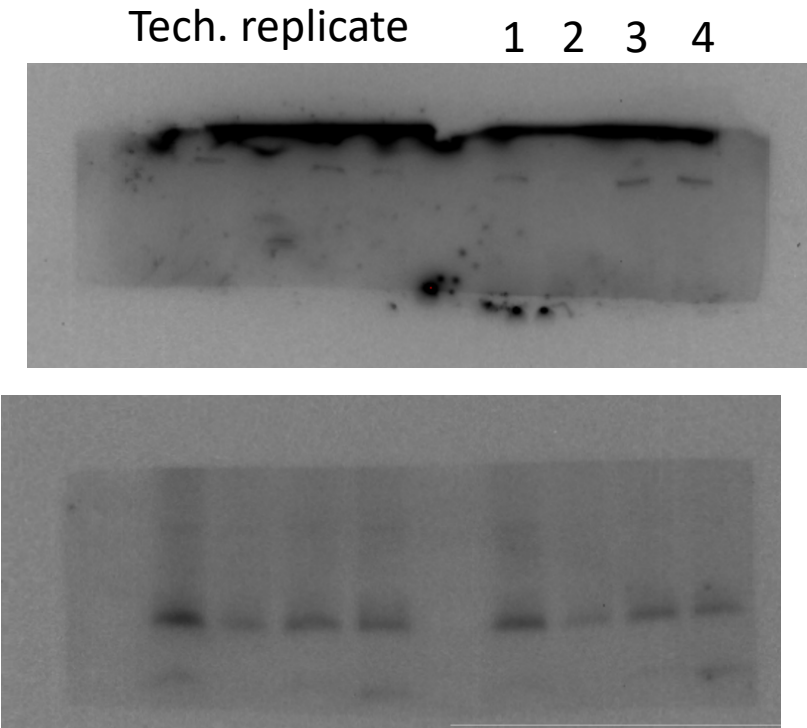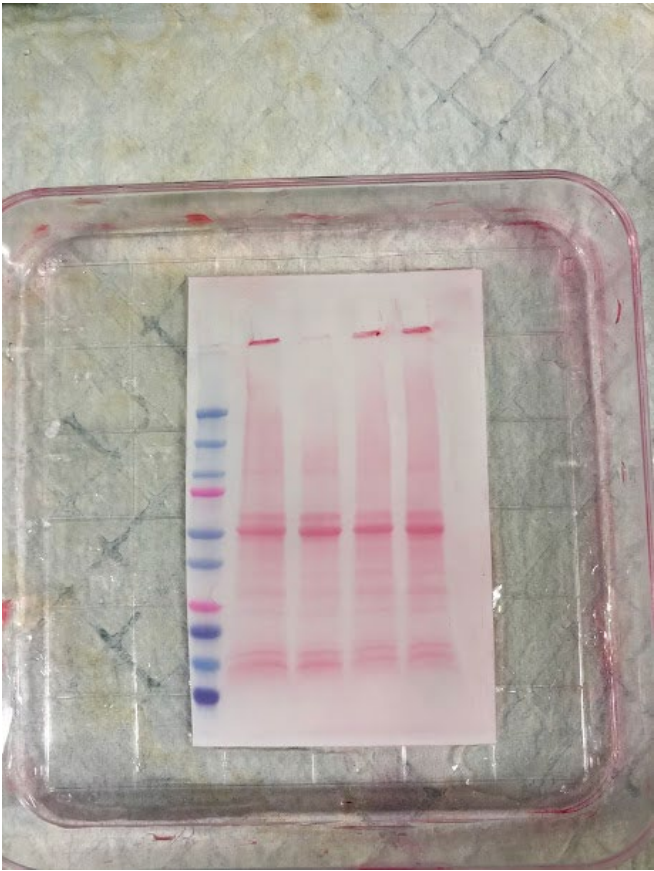

Panel 3

- 1) Wildtype
- 2) *Atm*<sup>R35X/R35X</sup>
- 3) *Atm*<sup>R35X/R35X</sup> (G418)
- 4) *Atm*<sup>R35X/R35X</sup> (GJ103)

Panel image (reversed in figure)

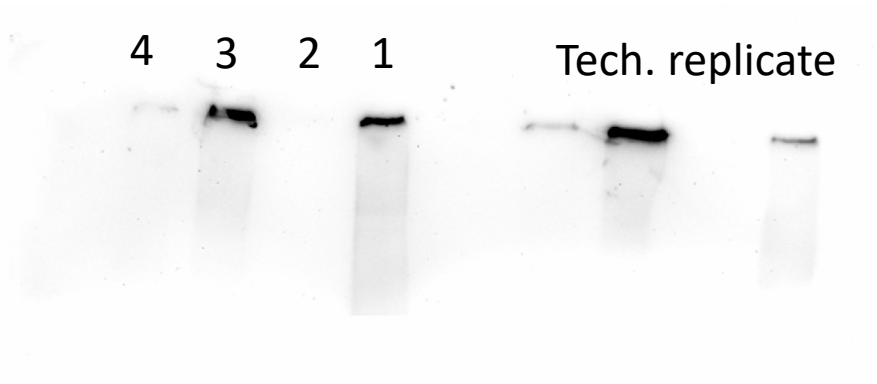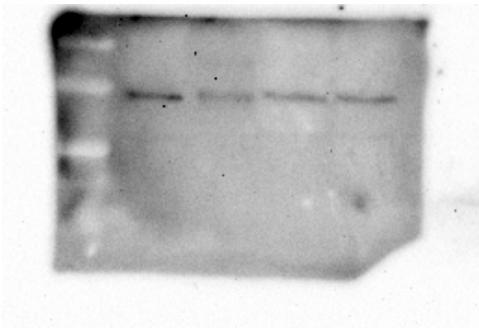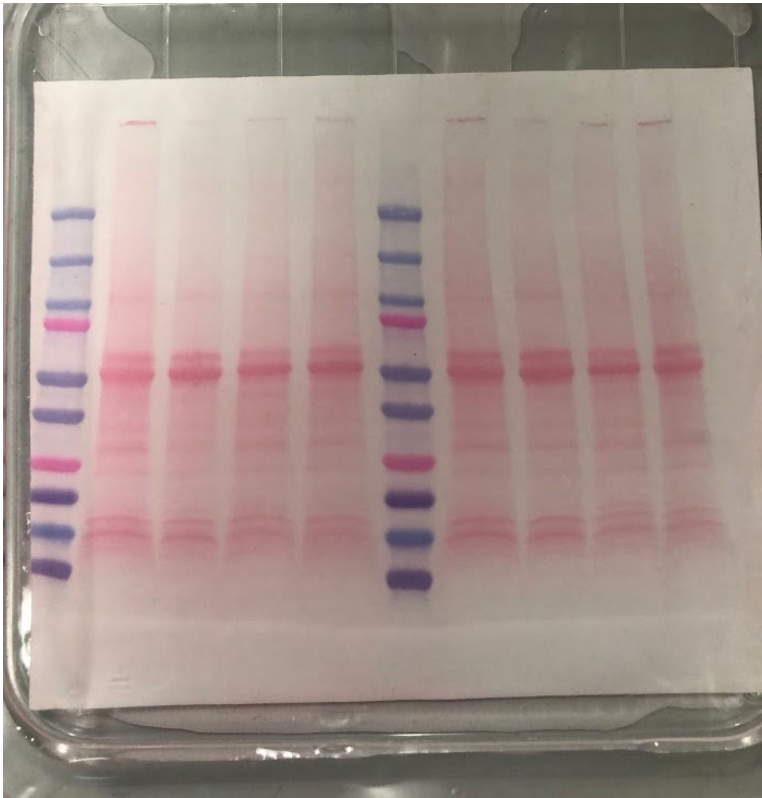

Supplement: fig8-data1 [file elife-64695-fig8-data1-v2.zip]
