# Supplementary material for: A novel, ataxic mouse model of ataxia telangiectasia caused by a clinically relevant nonsense mutation
Source: eLife. 2021 Nov 1;10:e64695. doi: 10.7554/eLife.64695 (PMC8601662; doi:10.7554/eLife.64695)
Supplement: Figure 2—source data 1. [file elife-64695-fig2-data1.xlsx]

## Sheet: Weight
Genotype ID Tag #		Animal ID #	P8	P45	P120	P210	P400	sex			Genotype Key
1		680	#N/A	21.2	27.6	33.4	42	M			1	AtmWt/Wt; Aptx+/+	M
1		681	#N/A	21.5	27.7	31.6	34.7	M			2	AtmWt/Wt; Aptx+/+	F
1		720	3.5	18.3	25.5	29.8	38.9	M			3	AtmN/N; Aptx-/-	M
1		722	3.5	17.7	24.1	29.2	37.1	M			4	AtmN/N; Aptx-/-	F
1		723	3.3	16.5	23.8	29.8	41.8	M			5	AtmN/Wt; Aptx-/-	M
1		741	3.7	20.8	27	32.6	46	M			6	AtmN/Wt; Aptx-/-	F
1		751	4.6	17.8	28.9	32	44.9	M			7	AtmN/N; Aptx+/+	M
1		798	5	20.7	26.7	19.8	30.9	M			8	AtmN/N; Aptx+/+	F
1		799	5	21.1	27.2	31.5	40.4	M			9	AtmWt/Wt; Aptx-/-	M
1		800	4.1	20.9	29.3	34	39.4	M			10	AtmWt/Wt; Aptx-/-	F
1		801	5	22.1	30.5	37.9	51.5	M			11	AtmN/Wt; Aptx+/+	M
1		814	6.6	22.9	31.7	37	48.5	M			12	AtmN/Wt; Aptx+/+	F
1		885	5.1	23.1	32.8	44.2	56.7	M			13	AtmN/N; Aptx+/-	M
1		887	5.4	21.1	25.8	32.3	47.4	M			14	AtmN/N; Aptx+/-	F
1		903	4.5	19.3	27.7	32.7	43.3	M
1		904	4.2	18.7	25.9	33	43.1	M
1		915	5	#N/A	#N/A	#N/A	#N/A	M
1		916	4.1	#N/A	#N/A	#N/A	#N/A	M
1		917	4.1	#N/A	#N/A	#N/A	#N/A	M
1		918	4.5	#N/A	#N/A	#N/A	#N/A	M
1		973	4.2	#N/A	#N/A	#N/A	#N/A	M
1		984	3.7	#N/A	#N/A	#N/A	#N/A	M
1		1154	3.4	#N/A	#N/A	#N/A	#N/A	M
2		628	#N/A	#N/A	23.7	26.6	30.3	F
2		676	#N/A	16.1	20.5	21.9	25.4	F
2		735	3.7	17.8	21.1	22.7	24.7	F
2		748	3.5	17.3	21.2	19.3	21.8	F
2		821	5.7	18.1	26.3	30.2	33.1	F
2		873	4	17.2	23.5	25.2	26.9	F
2		874	3.4	15.9	20.6	23	25.9	F
2		875	4.3	17.6	24.2	25.6	35	F
2		876	3.8	17.3	21.8	22.3	28.2	F
2		877	3.8	17.6	20.8	22.9	28.8	F
2		878	3.9	17.3	21.6	22.6	27.2	F
2		910	4.3	17.2	21.3	26	30.4	F
2		911	3.6	14.3	19.7	25.9	29.1	F
2		912	4.2	16.8	21.1	21.6	#N/A	F
2		913	4.2	17.6	23	35.6	36.9	F
2		914	3.8	16.8	21.4	24.2	36.1	F
2		953	7.8	#N/A	#N/A	#N/A	#N/A	F
2		969	4.2	#N/A	#N/A	#N/A	#N/A	F
2		979	4.5	#N/A	#N/A	#N/A	#N/A	F
2		1018	5.6	#N/A	#N/A	#N/A	#N/A	F
2		1150	3.7	#N/A	#N/A	#N/A	#N/A	F
3		550	#N/A	#N/A	#N/A	37.5	45	M
3		551	#N/A	#N/A	#N/A	32.7	37.1	M
3		554	#N/A	#N/A	#N/A	34.4	42.1	M
3		560	#N/A	#N/A	#N/A	30	23.4	M
3		566	#N/A	#N/A	#N/A	35.2	38.7	M
3		570	#N/A	#N/A	#N/A	34.7	41.2	M
3		650	#N/A	23.3	29.1	32.8	32	M
3		658	#N/A	17.7	28.2	28.2	29	M
3		661	#N/A	20.8	27	31.9	33.7	M
3		663	#N/A	20	27.8	35.1	43.7	M
3		668	#N/A	22.8	28.8	32.6	34.3	M
3		669	#N/A	16.2	26.6	32.6	36.8	M
3		673	#N/A	21	27.4	33.5	35.6	M
3		700	4	24.4	26.4	28.6	37.7	M
3		712	4.1	21.3	27.1	30.7	37.9	M
3		718	6.3	25.9	34.8	41	#N/A	M
3		729	6.5	22.8	28.7	31.8	#N/A	M
3		776	4	22	28.1	33.4	31.6	M
4		547	#N/A	#N/A	#N/A	28.5	32.6	F
4		565	#N/A	#N/A	#N/A	24.8	30.6	F
4		586	#N/A	#N/A	#N/A	21.2	#N/A	F
4		625	#N/A	#N/A	#N/A	23.9	39.4	F
4		648	#N/A	15.2	19.7	22.6	24.5	F
4		649	#N/A	16	18.6	22.8	31.1	F
4		696	3.5	18.1	21	23.8	29.1	F
4		697	3.8	17.6	19.9	21.8	25.6	F
4		706	4.4	20	22.1	23.7	30	F
4		714	5.6	17.7	24.6	28.5	#N/A	F
4		728	6.6	#N/A	#N/A	#N/A	#N/A	F
4		755	4.2	16.9	18.4	19.4	23.2	F
4		764	3.4	16.7	19.7	23.7	31.2	F
4		767	3.9	16.2	19.5	22.9	24.9	F
4		774	4.1	16.1	18	23	30	F
4		795	3.7	#N/A	#N/A	#N/A	#N/A	F
4		815	#N/A	17.4	22	#N/A	27.4	F
5		721	3.5	17.5	24.9	30.7	39.8	M
5		902	4.9	19.3	28.1	32.7	36.4	M
5		972	4.1	20.4	27.6	35.6	#N/A	M
5		981	3.3	16.5	21.9	25.4	31.2	M
5		982	3.3	19.3	25.8	60.9	#N/A	M
5		1015	#N/A	16	20.1	23.9	27.3	M
5		1017	#N/A	18.5	23.8	27.7	32.6	M
5		1102	#N/A	19.2	26.8	33.7	#N/A	M
5		1248	#N/A	19.5	26.9	31.8	34.4	M
5		1249	#N/A	21.3	28.6	33.1	#N/A	M
5		1250	#N/A	21	26	29.5	31.4	M
5		1266	#N/A	22.2	28.1	34.3	33.3	M
6		749	4.3	15.1	19.8	22	#N/A	F
6		868	2.9	12.6	17.8	19.8	25.9	F
6		977	3.7	15.1	19.4	21.2	23.2	F
6		1074	#N/A	15.8	19.1	20.2	24.7	F
6		1077	#N/A	15.4	19.9	#N/A	#N/A	F
6		1078	#N/A	19.9	26	30	#N/A	F
6		1096	#N/A	15.8	21.3	22.7	25.2	F
6		1262	#N/A	14.5	18.8	23.3	26.5	F
6		1306	#N/A	16.7	21.5	24.3	30.9	F
6		1333	#N/A	15.3	19.4	19.9	#N/A	F
6		1429	#N/A	14.6	17.5	#N/A	#N/A	F
6		1599	#N/A	16.7	19.6	21.6	#N/A	F
7		552	#N/A	#N/A	#N/A	23.4	#N/A	M
7		561	#N/A	#N/A	#N/A	21.8	22.4	M
7		562	#N/A	#N/A	#N/A	21.9	21.6	M
7		568	#N/A	#N/A	#N/A	19.7	23.7	M
7		639	#N/A	#N/A	22.2	23.4	18.4	M
7		646	#N/A	13.9	19.2	21.3	19.6	M
7		651	#N/A	19.1	23.8	24.7	24.2	M
7		656	#N/A	14.7	18.2	#N/A	#N/A	M
7		660	#N/A	11.5	21.5	22.6	25.5	M
7		666	#N/A	9.7	22.8	26.3	25.5	M
7		685	#N/A	14	18.8	19.3	#N/A	M
7		686	#N/A	14.8	20	#N/A	#N/A	M
7		687	#N/A	11.9	16.4	19	19.3	M
7		688	#N/A	#N/A	#N/A	#N/A	#N/A	M
7		689	#N/A	11.4	15.8	18	17.2	M
7		699	3.9	20.5	21.3	23.1	22.7	M
7		704	4.7	10.6	19.7	#N/A	#N/A	M
7		726	3.6	#N/A	#N/A	#N/A	#N/A	M
7		730	5	18.3	22.1	#N/A	#N/A	M
7		731	5.9	16.4	21.2	22.7	21.1	M
7		768	3.2	#N/A	#N/A	#N/A	#N/A	M
7		769	2.1	#N/A	#N/A	#N/A	#N/A	M
7		793	4	#N/A	#N/A	#N/A	#N/A	M
7		794	4.3	#N/A	#N/A			M
8		557	#N/A	#N/A	#N/A	17.4	16.6	F
8		640	#N/A	10.1	14.5	#N/A	#N/A	F
8		641	#N/A	11.3	15.4	16.5	16.3	F
8		654	#N/A	12.5	14.7	17	16.7	F
8		655	#N/A	11.8	14.7	15.7	16.7	F
8		665	#N/A	6.8	14.4	15.9	#N/A	F
8		672	#N/A	12.3	17.3	19	#N/A	F
8		695	3.8	16.1	18.7	20.8	17.8	F
8		698	3.2	15.4	17.5	17	16.6	F
8		702	4.9	16.1	17.9	#N/A	#N/A	F
8		708	3.8	14	17.8	18.5	18.1	F
8		710	3.5	14.5	15.8	16	16.6	F
8		724	3.5	#N/A	#N/A	#N/A	#N/A	F
8		725	3.5	12.4	15.2	#N/A	#N/A	F
8		753	4.7	14.3	15.9	18.6	20.3	F
8		754	4.2	13.6	15.3	15	#N/A	F
8		789	4.3	#N/A	#N/A	#N/A	#N/A	F
8		791	4.2	#N/A	#N/A	#N/A	#N/A	F
8		816	#N/A	13.3	#N/A	#N/A	#N/A	F
8		823	2.5	12.6	17	#N/A	#N/A	F
8		864	2.3	8.4	12.4	13.5	#N/A	F
9		1139	#N/A	21.4	#N/A	#N/A	36.8	M
9		1151	2.4	12.9	#N/A	#N/A	#N/A	M
9		1420	#N/A	18.6	#N/A	#N/A	#N/A	M
9		1436	#N/A	20.1	#N/A	#N/A	#N/A	M
9		1596	#N/A	20.9	27.1	31.8	21.2	M
9		1598	#N/A	18.5	27.6	36.1	42.6	M
9		1707	#N/A	25.7	#N/A	43.8	#N/A	M
9		1708	#N/A	21.7	32	40.3	34	M
10		866	3.3	14	16.2	18.8	27	F
10		1013	#N/A	#N/A	#N/A	#N/A	26.3	F
10		1021	5.4	#N/A	#N/A	#N/A	#N/A	F
10		1151	2.4	12.9	#N/A	#N/A	#N/A	F
10		1276	#N/A	17.8	#N/A	#N/A	24.2	F
10		1277	#N/A	15.5	#N/A	#N/A	#N/A	F
10		1278	#N/A	17.3	#N/A	#N/A	#N/A	F
10		1280	#N/A	16.9	#N/A	#N/A	#N/A	F
10		1284	#N/A	16.1	#N/A	#N/A	28.1	F
10		1414	#N/A	13.4	#N/A	#N/A	#N/A	F
10		1415	#N/A	15	#N/A	#N/A	#N/A	F
10		1431	#N/A	#N/A	#N/A	#N/A	26	F
10		1593	#N/A	#N/A	#N/A	26.4	38.8	F
10		1619	#N/A	#N/A	#N/A	#N/A	#N/A	F
10		1627	#N/A	#N/A	20.8	17.3	#N/A	F
11		553	#N/A	#N/A	#N/A	#N/A	34.1	M
11		563	#N/A	#N/A	#N/A	#N/A	39	M
11		567	#N/A	#N/A	#N/A	#N/A	34.7	M
11		569	#N/A	#N/A	#N/A	#N/A	34.7	M
11		591	#N/A	#N/A	#N/A	#N/A	33.7	M
11		592	#N/A	#N/A	#N/A	#N/A	30	M
11		593	#N/A	#N/A	#N/A	#N/A	30	M
11		638	#N/A	#N/A	#N/A	#N/A	34.9	M
11		645	#N/A	14.7	#N/A	#N/A	19.7	M
11		652	#N/A	22.5	#N/A	#N/A	#N/A	M
11		657	#N/A	19.8	#N/A	#N/A	#N/A	M
11		662	#N/A	19.8	#N/A	#N/A	33	M
11		667	#N/A	17.3	#N/A	#N/A	38.6	M
11		674	#N/A	21.8	#N/A	#N/A	41.2	M
11		701	3.7	22.1	#N/A	#N/A	38.6	M
11		703	5.3	23.3	#N/A	#N/A	46.9	M
11		705	4.7	20.1	#N/A	#N/A	40.3	M
11		716	5.1	#N/A	#N/A	#N/A	#N/A	M
11		717	5.8	23.9	#N/A	#N/A	41.1	M
11		756	4.8	20.8	#N/A	#N/A	34.6	M
11		757	4.7	21.3	#N/A	#N/A	30.8	M
11		773	3.6	#N/A	#N/A	#N/A	#N/A	M
11		775	4.4	#N/A	#N/A	#N/A	#N/A	M
11		777	4.4	#N/A	#N/A	#N/A	#N/A	M
11		778	4.6	#N/A	#N/A	#N/A	#N/A	M
11		781	5.7	#N/A	#N/A	#N/A	#N/A	M
11		782	5.2	#N/A	#N/A	#N/A	#N/A	M
11		784	5.4	#N/A	#N/A	#N/A	#N/A	M
11		792	4.2	#N/A	#N/A	#N/A	#N/A	M
12		546	#N/A	#N/A	#N/A	#N/A	35.2	F
12		549	#N/A	#N/A	#N/A	#N/A	41.4	F
12		555	#N/A	#N/A	#N/A	#N/A	24.6	F
12		556	#N/A	#N/A	#N/A	#N/A	24.4	F
12		564	#N/A	#N/A	#N/A	#N/A	28.9	F
12		626	#N/A	#N/A	#N/A	#N/A	26.2	F
12		633	#N/A	#N/A	#N/A	#N/A	26.6	F
12		634	#N/A	#N/A	#N/A	#N/A	25.6	F
12		647	#N/A	16.9	#N/A	#N/A	34.3	F
12		653	#N/A	14.7	#N/A	#N/A	#N/A	F
12		659	#N/A	16.9	#N/A	#N/A	29.4	F
12		664	#N/A	19	#N/A	#N/A	42	F
12		694	3.9	18.3	#N/A	#N/A	29.2	F
12		707	3.9	16.9	#N/A	#N/A	23	F
12		709	4.9	18.7	#N/A	#N/A	29.8	F
12		711	4.5	20.2	#N/A	#N/A	43.9	F
12		713	5.3	#N/A	#N/A	#N/A	#N/A	F
12		715	6.5	#N/A	#N/A	#N/A	#N/A	F
12		762	2.7	#N/A	#N/A	#N/A	#N/A	F
12		763	4	#N/A	#N/A	#N/A	#N/A	F
12		765	3.3	#N/A	#N/A	#N/A	#N/A	F
12		766	3	#N/A	#N/A	#N/A	#N/A	F
12		770	5.2	#N/A	#N/A	#N/A	#N/A	F
12		772	4.6	#N/A	#N/A	#N/A	#N/A	F
12		780	5.4	#N/A	#N/A	#N/A	#N/A	F
12		790	4.7	#N/A	#N/A	#N/A	#N/A	F
13		632	#N/A	#N/A	30.3	#N/A	46.1	M
13		677	#N/A	20	#N/A	#N/A	32.6	M
13		678	#N/A	21.6	#N/A	#N/A	39.8	M
13		679	#N/A	18.5	#N/A	#N/A	36.1	M
13		682	#N/A	24.2	#N/A	#N/A	42.3	M
13		742	4	22.4	#N/A	#N/A	35.8	M
13		745	5.2	24.5	#N/A	#N/A	57.3	M
13		750	4.7	17.8	#N/A	#N/A	41	M
13		752	4.5	19.2	#N/A	#N/A	#N/A	M
13		796	4.3	21.2	#N/A	#N/A	37.2	M
13		797	5.7	23.1	#N/A	#N/A	36.7	M
13		802	4.7	22.1	#N/A	#N/A	45.4	M
13		812	6	23	#N/A	#N/A	33.4	M
13		813	6.6	25.4	#N/A	#N/A	50.7	M
13		825	4.6	21.8	#N/A	#N/A	47.3	M
13		901	4.6	21.1	#N/A	#N/A	35.3	M
13		905	3.2	#N/A	#N/A	#N/A	#N/A	M
13		922	4.1	#N/A	#N/A	#N/A	#N/A	M
13		927	3.2	#N/A	#N/A	#N/A	#N/A	M
13		971	4.1	#N/A	#N/A	#N/A	#N/A	M
13		974	4.2	#N/A	#N/A	#N/A	#N/A	M
13		975	4.5	#N/A	#N/A	#N/A	#N/A	M
13		983	3.5	#N/A	#N/A	#N/A	#N/A	M
13		1022	5.7	#N/A	#N/A	#N/A	#N/A	M
13		1023	5.5	#N/A	#N/A	#N/A	#N/A	M
13		1149	3.8	#N/A	#N/A	#N/A	#N/A	M
13		1153	3.8	#N/A	#N/A	#N/A	#N/A	M
13		1156	4.1	#N/A	#N/A	#N/A	#N/A	M
14		719	3.2	14.9	#N/A	#N/A	24.1	F
14		732	3.7	#N/A	#N/A	#N/A	#N/A	F
14		733	4.3	17.4	#N/A	#N/A	30.5	F
14		737	3.8	17	#N/A	#N/A	26	F
14		747	4.4	16.3	#N/A	#N/A	34.6	F
14		811	6.4	16.8	#N/A	#N/A	37	F
14		822	4.8	16.3	#N/A	#N/A	27.4	F
14		839	4.6	#N/A	#N/A	#N/A	#N/A	F
14		865	3.5	13.8	#N/A	#N/A	27.8	F
14		897	4	16.3	#N/A	#N/A	38.5	F
14		898	3.8	#N/A	#N/A	#N/A	#N/A	F
14		899	4.6	16.3	#N/A	#N/A	36.7	F
14		900	4.5	15.9	#N/A	#N/A	29.5	F
14		970	3.9	#N/A	#N/A	#N/A	#N/A	F
14		976	4.5	#N/A	#N/A	#N/A	#N/A	F
14		978	4	16	#N/A	#N/A	31.8	F
14		980	3.6	15.7	#N/A	#N/A	28.7	F
14		1332	#N/A	18	#N/A	#N/A	#N/A	F

## Sheet: Survival
Animal IDs	Sex	Genotype	DOB	DOD	Age at death or still alive at P400
546	F	AtmN/Wt; Aptx-/-	2018-07-11	2019-10-18	400
547	F	AtmWt/Wt; Aptx-/-	2018-07-11	2019-10-18	400
549	F	AtmN/Wt; Aptx-/-	2018-07-11	2019-10-18	400
550	M	AtmWt/Wt; Aptx-/-	2018-07-11	2019-10-23	400
551	M	AtmWt/Wt; Aptx-/-	2018-07-11	2019-10-23	400
552	M	AtmN/N; Aptx-/-	2018-07-11	2019-04-10	273
553	M	AtmN/Wt; Aptx-/-	2018-07-11	2019-10-23	400
554	M	AtmWt/Wt; Aptx-/-	2018-07-11	2019-10-23	400
555	F	AtmN/Wt; Aptx-/-	2018-07-11	2019-10-23	400
556	F	AtmN/Wt; Aptx-/-	2018-07-11	2019-10-23	400
557	F	AtmN/N; Aptx-/-	2018-07-11	2019-10-23	400
560	M	AtmWt/Wt; Aptx-/-	2018-07-11	2019-10-18	400
561	M	AtmN/N; Aptx-/-	2018-07-11	2019-10-18	400
562	M	AtmN/N; Aptx-/-	2018-07-11	2019-10-18	400
563	M	AtmN/Wt; Aptx-/-	2018-07-11	2019-10-08	400
564	F	AtmN/Wt; Aptx-/-	2018-07-15	2019-10-25	400
565	F	AtmWt/Wt; Aptx-/-	2018-07-15	2019-10-16	400
566	M	AtmWt/Wt; Aptx-/-	2018-07-15	2019-10-23	400
567	M	AtmN/Wt; Aptx-/-	2018-07-15	2019-10-23	400
568	M	AtmN/N; Aptx-/-	2018-07-15	2019-10-23	400
569	M	AtmN/Wt; Aptx-/-	2018-07-15	2019-10-23	400
570	M	AtmWt/Wt; Aptx-/-	2018-07-15	2019-10-23	400
586	F	AtmWt/Wt; Aptx-/-	2018-07-16	2019-10-25	400
591	M	AtmN/Wt; Aptx-/-	2018-07-16	2019-10-25	400
592	M	AtmN/Wt; Aptx-/-	2018-07-16	2019-10-25	400
593	M	AtmN/Wt; Aptx-/-	2018-07-16	2019-10-25	400
625	F	AtmWt/Wt; Aptx-/-	2018-07-30	2019-11-06	400
626	F	AtmN/Wt; Aptx-/-	2018-07-30	2019-11-06	400
628	F	AtmWt/Wt; Aptx+/+	2018-08-04	2019-11-06	400
632	M	AtmN/Wt; Aptx+/+	2018-08-04	2019-11-06	400
633	F	AtmN/Wt; Aptx-/-	2018-08-11	2019-11-06	400
634	F	AtmN/Wt; Aptx-/-	2018-08-11	2019-11-06	400
637	M	AtmN/Wt; Aptx-/-	2018-08-11	2018-09-28	48
638	M	AtmN/Wt; Aptx-/-	2018-08-11	2019-09-25	400
639	M	AtmN/N; Aptx-/-	2018-08-11	2019-10-06	400
640	F	AtmN/N; Aptx-/-	2018-08-14	2019-02-21	191
641	F	AtmN/N; Aptx-/-	2018-08-14	2019-11-15	400
645	M	AtmN/Wt; Aptx-/-	2018-08-14	2019-09-30	400
646	M	AtmN/Wt; Aptx-/-	2018-08-14	2019-09-25	400
647	F	AtmN/Wt; Aptx-/-	2018-08-16	2019-11-15	400
648	F	AtmWt/Wt; Aptx-/-	2018-08-16	2019-11-15	400
649	F	AtmWt/Wt; Aptx-/-	2018-08-16	2019-11-15	400
650	M	AtmWt/Wt; Aptx-/-	2018-08-16	2019-11-15	400
651	M	AtmN/N; Aptx-/-	2018-08-16	2019-11-15	400
652	M	AtmN/Wt; Aptx-/-	2018-08-16	2019-05-07	264
653	F	AtmN/Wt; Aptx-/-	2018-08-20	2019-05-15	268
654	F	AtmN/N; Aptx-/-	2018-08-20	2019-12-06	400
655	F	AtmN/N; Aptx-/-	2018-08-20	2019-12-06	400
656	M	AtmN/N; Aptx-/-	2018-08-20	2019-02-21	185
657	M	AtmN/Wt; Aptx-/-	2018-08-20	2019-05-15	268
658	M	AtmWt/Wt; Aptx-/-	2018-08-20	2019-10-30	400
659	F	AtmN/Wt; Aptx-/-	2018-08-21	2019-12-06	400
660	M	AtmN/N; Aptx-/-	2018-08-21	2019-12-04	400
661	M	AtmWt/Wt; Aptx-/-	2018-08-21	2019-12-06	400
662	M	AtmN/Wt; Aptx-/-	2018-08-21	2019-12-06	400
663	M	AtmWt/Wt; Aptx-/-	2018-08-21	2019-12-06	400
664	F	AtmN/Wt; Aptx-/-	2018-08-22	2019-12-06	400
665	F	AtmN/N; Aptx-/-	2018-08-22	2019-06-04	286
666	M	AtmN/N; Aptx-/-	2018-08-22	2019-12-06	400
667	M	AtmN/Wt; Aptx-/-	2018-08-22	2019-12-06	400
668	M	AtmWt/Wt; Aptx-/-	2018-08-22	2019-12-06	400
669	M	AtmWt/Wt; Aptx-/-	2018-08-22	2019-12-06	400
672	F	AtmN/N; Aptx-/-	2018-08-27	2019-04-14	230
673	M	AtmWt/Wt; Aptx-/-	2018-08-27	2019-10-30	400
674	M	AtmN/Wt; Aptx-/-	2018-08-27	2019-10-30	400
676	F	AtmWt/Wt; Aptx+/+	2018-08-27	2019-12-06	400
677	M	AtmN/Wt; Aptx+/+	2018-08-27	2020-01-23	400
678	M	AtmN/Wt; Aptx+/+	2018-08-27	2020-01-23	400
679	M	AtmN/Wt; Aptx+/+	2018-08-27	2020-01-23	400
680	M	AtmWt/Wt; Aptx+/+	2018-08-27	2019-12-06	400
681	M	AtmWt/Wt; Aptx+/+	2018-08-27	2019-12-06	400
682	M	AtmN/Wt; Aptx+/+	2018-08-27	2019-12-06	400
685	M	AtmN/N; Aptx-/-	2018-08-31	2019-09-12	377
686	M	AtmN/N; Aptx-/-	2018-08-31	2019-03-21	202
687	M	AtmN/N; Aptx-/-	2018-08-31	2019-11-13	400
688	M	AtmN/N; Aptx-/-	2018-08-31	2018-10-02	32
689	M	AtmN/N; Aptx-/-	2018-08-31	2019-12-06	400
694	F	AtmN/Wt; Aptx-/-	2018-09-11	2019-11-21	400
695	F	AtmN/N; Aptx-/-	2018-09-11	2019-12-19	400
696	F	AtmWt/Wt; Aptx-/-	2018-09-11	2019-12-19	400
697	F	AtmWt/Wt; Aptx-/-	2018-09-11	2019-12-19	400
698	F	AtmN/N; Aptx-/-	2018-09-11	2019-12-19	400
699	M	AtmN/N; Aptx-/-	2018-09-11	2019-12-19	400
700	M	AtmWt/Wt; Aptx-/-	2018-09-11	2019-11-21	400
701	M	AtmN/Wt; Aptx-/-	2018-09-11	2019-11-21	400
702	F	AtmN/N; Aptx-/-	2018-09-13	2019-03-21	189
703	M	AtmN/Wt; Aptx-/-	2018-09-13	2019-12-19	400
704	M	AtmN/N; Aptx-/-	2018-09-13	2019-04-04	203
705	M	AtmN/Wt; Aptx-/-	2018-09-13	2019-11-21	400
706	F	AtmWt/Wt; Aptx-/-	2018-09-14	2019-12-30	400
707	F	AtmN/Wt; Aptx-/-	2018-09-14	2019-11-21	400
708	F	AtmN/N; Aptx-/-	2018-09-14	2019-12-30	400
709	F	AtmN/Wt; Aptx-/-	2018-09-14	2019-11-21	400
710	F	AtmN/N; Aptx-/-	2018-09-14	2019-11-07	400
711	F	AtmN/Wt; Aptx-/-	2018-09-14	2019-11-21	400
712	M	AtmWt/Wt; Aptx-/-	2018-09-14	2019-11-21	400
714	F	AtmWt/Wt; Aptx-/-	2018-09-17	2019-07-29	315
718	M	AtmWt/Wt; Aptx-/-	2018-09-17	2019-06-13	269
719	F	AtmN/Wt; Aptx+/+	2018-09-18	2019-12-23	400
720	M	AtmWt/Wt; Aptx+/+	2018-09-18	2019-12-30	400
721	M	AtmN/N; Aptx+/+	2018-09-18	2019-12-30	400
722	M	AtmWt/Wt; Aptx+/+	2018-09-18	00:00:00	400
723	M	AtmWt/Wt; Aptx+/+	2018-09-18	2019-11-21	400
724	F	AtmN/N; Aptx-/-	2018-09-20	2018-10-15	25
725	F	AtmN/N; Aptx-/-	2018-09-20	2019-04-09	201
726	M	AtmN/N; Aptx-/-	2018-09-20	2019-01-07	109
729	M	AtmWt/Wt; Aptx-/-	2018-09-22	2019-08-19	331
730	M	AtmN/N; Aptx-/-	2018-09-22	2019-02-13	144
731	M	AtmN/N; Aptx-/-	2018-09-22	2019-12-27	400
733	F	AtmN/Wt; Aptx+/+	2018-09-20	2019-12-27	400
735	F	AtmWt/Wt; Aptx+/+	2018-09-20	2019-12-23	400
737	F	AtmN/Wt; Aptx+/+	2018-09-20	2019-11-21	400
741	M	AtmWt/Wt; Aptx+/+	2018-09-20	2019-12-23	400
742	M	AtmN/Wt; Aptx+/+	2018-09-20	2019-11-21	400
745	M	AtmN/Wt; Aptx+/+	2018-09-21	2019-11-21	400
747	F	AtmN/Wt; Aptx+/+	2018-09-25	2019-10-30	400
748	F	AtmWt/Wt; Aptx+/+	2018-09-25	2019-10-30	400
749	F	AtmN/N; Aptx+/+	2018-09-25	2019-10-24	394
750	M	AtmN/Wt; Aptx+/+	2018-09-25	2019-10-30	400
751	M	AtmWt/Wt; Aptx+/+	2018-09-25	00:00:00	400
752	M	AtmN/Wt; Aptx+/+	2018-09-25	2019-08-29	338
753	F	AtmN/N; Aptx-/-	2018-09-26	2019-12-30	400
754	F	AtmN/N; Aptx-/-	2018-09-26	2019-08-12	320
755	F	AtmWt/Wt; Aptx-/-	2018-09-26	2019-12-30	400
756	M	AtmN/Wt; Aptx-/-	2018-09-26	2019-11-21	400
757	M	AtmN/Wt; Aptx-/-	2018-09-26	2019-11-21	400
764	F	AtmWt/Wt; Aptx-/-	2018-09-28	2019-12-30	400
767	F	AtmWt/Wt; Aptx-/-	2018-09-28	2019-10-30	397
769	M	AtmN/N; Aptx-/-	2018-09-28	2018-10-18	20
774	F	AtmWt/Wt; Aptx-/-	2018-09-28	2019-10-30	397
776	M	AtmWt/Wt; Aptx-/-	2018-09-28	2019-11-21	400
796	M	AtmN/Wt; Aptx+/+	2018-10-09	2020-01-06	400
797	M	AtmN/Wt; Aptx+/+	2018-10-09	2020-01-06	400
798	M	AtmWt/Wt; Aptx+/+	2018-10-09	2020-01-06	400
799	M	AtmWt/Wt; Aptx+/+	2018-10-09	2020-01-06	400
800	M	AtmWt/Wt; Aptx+/+	2018-10-09	2020-01-06	400
801	M	AtmWt/Wt; Aptx+/+	2018-10-09	2020-01-06	400
802	M	AtmN/Wt; Aptx+/+	2018-10-09	2019-11-21	400
811	F	AtmN/Wt; Aptx+/+	2018-10-15	2019-11-21	400
812	M	AtmN/Wt; Aptx+/+	2018-10-15	2019-11-21	400
813	M	AtmN/Wt; Aptx+/+	2018-10-15	2019-11-21	400
814	M	AtmWt/Wt; Aptx+/+	2018-10-15	2019-11-21	400
815	F	AtmWt/Wt; Aptx-/-	2018-10-15	00:00:00	400
816	F	AtmN/N; Aptx-/-	2018-10-15	2019-02-07	115
821	F	AtmWt/Wt; Aptx+/+	2018-10-15	2019-11-21	400
822	F	AtmN/Wt; Aptx+/+	2018-10-15	2019-11-21	400
823	F	AtmN/N; Aptx-/-	2018-10-15	2019-02-28	136
825	M	AtmN/Wt; Aptx+/+	2018-10-15	2019-11-21	400
864	F	AtmN/N; Aptx-/-	2018-10-29	2019-11-21	388
865	F	AtmN/Wt; Aptx+/+	2018-10-29	2019-12-03	400
866	F	AtmN/N; Aptx+/-	2018-10-29	2019-12-03	400
868	F	AtmN/N; Aptx+/+	2018-10-29	2020-02-20	400
873	F	AtmWt/Wt; Aptx+/+	2018-11-07	2020-02-25	400
874	F	AtmWt/Wt; Aptx+/+	2018-11-07	2020-02-25	400
875	F	AtmWt/Wt; Aptx+/+	2018-11-07	2020-02-25	400
876	F	AtmWt/Wt; Aptx+/+	2018-11-07	2020-02-25	400
877	F	AtmWt/Wt; Aptx+/+	2018-11-07	2020-02-25	400
878	F	AtmWt/Wt; Aptx+/+	2018-11-07	2020-02-25	400
885	M	AtmWt/Wt; Aptx+/+	2018-11-04	2020-02-25	400
887	M	AtmWt/Wt; Aptx+/+	2018-11-04	2020-02-25	400
897	F	AtmN/Wt; Aptx+/+	2018-11-04	00:00:00	400
898	F	AtmN/Wt; Aptx+/+	2018-11-04	2018-12-11	37
899	F	AtmN/Wt; Aptx+/+	2018-11-04	2020-02-25	400
900	F	AtmN/Wt; Aptx+/+	2018-11-04	2020-02-25	400
901	M	AtmN/Wt; Aptx+/+	2018-11-04	2020-02-25	400
902	M	AtmN/N; Aptx+/+	2018-11-04	2020-02-25	400
903	M	AtmWt/Wt; Aptx+/+	2018-11-04	2020-02-25	400
904	M	AtmWt/Wt; Aptx+/+	2018-11-04	2020-02-25	400
910	F	AtmWt/Wt; Aptx+/+	2018-11-08	2020-02-25	400
911	F	AtmWt/Wt; Aptx+/+	2018-11-08	2020-02-25	400
912	F	AtmWt/Wt; Aptx+/+	2018-11-08	2019-12-04	391
913	F	AtmWt/Wt; Aptx+/+	2018-11-08	00:00:00	400
914	F	AtmWt/Wt; Aptx+/+	2018-11-08	00:00:00	400
972	M	AtmN/N; Aptx+/+	2018-11-23	2019-07-08	227
977	F	AtmN/N; Aptx+/+	2018-11-23	00:00:00	400
978	F	AtmN/Wt; Aptx+/+	2018-11-23	00:00:00	400
980	F	AtmN/Wt; Aptx+/+	2018-11-23	00:00:00	400
981	M	AtmN/N; Aptx+/+	2018-11-23	00:00:00	400
982	M	AtmN/N; Aptx+/+	2018-11-23	2019-12-26	398
1013	F	AtmN/N; Aptx+/-	2018-12-04	2020-02-20	400
1015	M	AtmN/N; Aptx+/+	2018-12-04	00:00:00	400
1017	M	AtmN/N; Aptx+/+	2018-12-04	00:00:00	400
1074	F	AtmN/N; Aptx+/+	2018-12-16	00:00:00	400
1077	F	AtmN/N; Aptx+/+	2018-12-16	2019-07-08	204
1078	M	AtmN/N; Aptx+/+	2018-12-16	2019-09-13	271
1096	F	AtmN/N; Aptx+/+	2018-12-17	00:00:00	400
1102	M	AtmN/N; Aptx+/+	2018-12-17	2019-10-31	318
1139	M	AtmN/N; Aptx+/-	2018-12-23	00:00:00	400
1151	M	AtmN/N; Aptx+/-	2018-12-30	2019-05-30	151
1248	M	AtmN/N; Aptx+/+	2019-01-28	00:00:00	400
1249	M	AtmN/N; Aptx+/+	2019-01-28	2019-10-17	262
1250	M	AtmN/N; Aptx+/+	2019-01-28	00:00:00	400
1262	F	AtmN/N; Aptx+/+	2019-01-28	00:00:00	400
1266	M	AtmN/N; Aptx+/+	2019-01-28	00:00:00	400
1276	F	AtmN/N; Aptx+/-	2019-01-28	00:00:00	400
1277	F	AtmN/N; Aptx+/-	2019-01-28	2019-08-08	192
1278	F	AtmN/N; Aptx+/-	2019-01-28	2019-12-04	310
1280	F	AtmN/N; Aptx+/-	2019-01-28	2019-07-24	177
1284	F	AtmN/N; Aptx+/-	2019-01-28	00:00:00	400
1306	F	AtmN/N; Aptx+/+	2019-02-01	00:00:00	400
1332	F	AtmN/Wt; Aptx+/+	2019-02-11	00:00:00	400
1333	F	AtmN/N; Aptx+/+	2019-02-11	2019-12-26	318
1414	F	AtmN/N; Aptx+/-	2019-02-28	2020-01-09	315
1415	F	AtmN/N; Aptx+/-	2019-02-28	2019-07-10	132
1420	M	AtmN/N; Aptx+/-	2019-02-28	2020-01-02	308
1429	F	AtmN/N; Aptx+/+	2019-02-28	2019-07-19	141
1431	F	AtmN/N; Aptx+/-	2019-02-28	2020-03-17	400
1436	M	AtmN/N; Aptx+/-	2019-02-28	2020-01-02	308
1593	F	AtmN/N; Aptx+/-	2019-04-02	00:00:00	400
1596	M	AtmN/N; Aptx+/-	2019-04-02	00:00:00	400
1598	M	AtmN/N; Aptx+/-	2019-04-02	00:00:00	400
1599	F	AtmN/N; Aptx+/+	2019-04-02	2020-02-27	331
1619	F	AtmN/N; Aptx+/-	2019-04-04	2019-07-18	105
1620	F	AtmN/Wt; Aptx+/-	2019-04-04	00:00:00	400
1627	F	AtmN/N; Aptx+/-	2019-04-10	2019-11-12	216
1707	M	AtmN/N; Aptx+/-	2019-04-28	2020-04-15	353
1708	M	AtmN/N; Aptx+/-	2019-04-28	00:00:00	400

## Sheet: Cause of Death
Probable cause of death
	AtmN/N; Aptx-/-	AtmWt/Wt; Aptx-/-	AtmN/Wt; Aptx-/-	AtmN/N; Aptx+/+	AtmWt/Wt; Aptx+/+	AtmN/Wt; Aptx+/+	AtmN/N; Aptx+/-
alive at 400	21	28	33	14	31	29	9
indeterminable	1	3	2	4	0	1	1
thymic tumor	11	0	0	4	0	0	7
other	0	0	0	1	1	0	2
missing	3	2	1	1	0	0	1
Total	36	33	36	24	32	30	20
