# Supplementary material for: A novel, ataxic mouse model of ataxia telangiectasia caused by a clinically relevant nonsense mutation
Source: eLife. 2021 Nov 1;10:e64695. doi: 10.7554/eLife.64695 (PMC8601662; doi:10.7554/eLife.64695)
Supplement: Figure 3—source data 1. [file elife-64695-fig3-data1.xlsx]

## Sheet: Pole test
sex	Genotype	Group	Group age	Weight (g)	Date	T1	T2	T3
F	AtmN/N; Aptx-/-	GE2	45		190610	30	30	30
F	AtmN/N; Aptx-/-	GE2	45	16.65	200225	6.28	7.84	8.82
M	AtmN/N; Aptx-/-	GE2	45		190610	20.82	30	9.39
M	AtmN/N; Aptx-/-	GE2	45		190610	12.44	9.97	7.27
F	AtmN/N; Aptx+/+	GH2	45	16.05	200220	6.82	5.94	5.97
F	AtmN/N; Aptx+/+	GE2	45	17.45	200309	7.93	5.53	4.88
F	AtmN/N; Aptx+/+	GE2	45	13.85	200312	7.97	6.63	6.34
F	AtmN/N; Aptx+/+	GE2	45	16.65	200401	6.91	8.37	8.38
F	AtmN/N; Aptx+/+	GH2	45	16.45	200408	8.87	8.19	6.65
F	AtmN/N; Aptx+/+	GH2	45	17.2	200408	6.25	5.51	4.57
M	AtmN/N; Aptx+/+	GH2	45	23.25	191125	8.65	7.41	6.13
M	AtmN/N; Aptx+/+	GH2	45	24	191125	5.32	3.59	3.65
M	AtmN/N; Aptx+/+	GH2	45	22.15	191211	7.53	6.34	5.97
M	AtmN/N; Aptx+/+	GH2	45	19.55	191211	5.64	5.07	5.27
M	AtmN/N; Aptx+/+	GH2	45	19.6	191211	5.44	5.16	6.84
M	AtmN/N; Aptx+/+	GE2	45	19.8	191211	14.57	14.88	10.4
M	AtmN/N; Aptx+/+	GE2	45	19.3	191211	9.16	8.72	8.45
M	AtmN/N; Aptx+/+	GE2	45	22.25	200227	16.14	9.69	10.63
M	AtmN/N; Aptx+/+	GE2	45	21.6	200227	6.25	7.56	5.21
M	AtmN/N; Aptx+/+	GH2	45	22.6	200227	5.68	6.16	8.06
F	AtmN/Wt; Aptx-/-	GE2	45	17.75	200225	11.62	14.21	13.91
F	AtmN/Wt; Aptx+/+	GH2	45	18.55	200220	7.63	8.16	7.53
F	AtmWt/Wt; Aptx-/-	GH2	45	15.35	190604	8.96	7.32	12
F	AtmWt/Wt; Aptx-/-	GE2	45	13.5	190604	7.5	9.08	7.03
F	AtmWt/Wt; Aptx-/-	GE2	45		190610	9.28	10.96	23.68
F	AtmWt/Wt; Aptx-/-	GE2	45		190610	21.12	13.2	11.96
M	AtmWt/Wt; Aptx-/-	GE2	45		190619	3.58	4.33	6.14
M	AtmWt/Wt; Aptx-/-	GE2	45		190619	25.84	21.84	30
F	AtmWt/Wt; Aptx+/+	TC1	45	17.95	200401	6.33	5.82	5.84
M	AtmWt/Wt; Aptx+/+	GE2	45	21.05	190812	11.83	9.1	7.96
F	AtmN/N; Aptx-/-	GH3	120	17.65	190515	7.84	7.26	8.27
F	AtmN/N; Aptx-/-	GH3	120	17.2	190524	10.18	10.13	14.81
F	AtmN/N; Aptx-/-	GH3	120	16.3	190524	8.45	9.08	8.13
F	AtmN/N; Aptx-/-	GH3	120		190614	8.96	11.13	8.51
F	AtmN/N; Aptx-/-	GH3	120		190624	8.63	8.14	7.13
F	AtmN/N; Aptx-/-	GH3	120		190624	7.82	5.78	5.06
F	AtmN/N; Aptx-/-	GH3	120		190731	8.77	31.38	23.02
F	AtmN/N; Aptx-/-	GE3	120	15.5	190821	7.39	5.63	5.21
F	AtmN/N; Aptx-/-	GE3	120	15.55	190821	5.5	7.1	5.51
F	AtmN/N; Aptx-/-	GE3	120	15.2	190821	6.14	6.06	6.66
M	AtmN/N; Aptx-/-	GH3	120	21.95	190604	13.54	15.54	13.19
M	AtmN/N; Aptx-/-	GH3	120	21.25	190604	10.51	7.93	7.72
M	AtmN/N; Aptx-/-	GH3	120		190614	5.83	5.44	4.56
M	AtmN/N; Aptx-/-	GH3	120		190614	11.21	10.39	9.38
M	AtmN/N; Aptx-/-	GH3	120		190614	13.7	14.17	9.59
M	AtmN/N; Aptx-/-	GH3	120		190614	7.09	8.02	6.19
M	AtmN/N; Aptx-/-	GE3	120	24.95	190808	8.31	5.69	7.48
M	AtmN/N; Aptx-/-	GE3	120	19.75	190919	4	4	2.81
M	AtmN/N; Aptx-/-	GE3	120	22.6	191006	6.78	8.22	8.08
M	AtmN/N; Aptx-/-	GE3	120	24.55	200102	15.18	14.34	12.56
F	AtmN/N; Aptx+/+	GH3	120	21.55	200227	8.57	6.09	4.77
F	AtmN/N; Aptx+/+	GH3	120	19.8	200227	7.27	7.25	7.27
F	AtmN/N; Aptx+/+	GH3	120	21.55	200227	7.12	6.01	5.46
F	AtmN/N; Aptx+/+	GH3	120	20.05	200227	11.14	15.47	30
F	AtmN/N; Aptx+/+	GE3	120	18.05	200317	10.82	8.91	7.46
F	AtmN/N; Aptx+/+	GE3	120	19.8	200317	9.68	8.19	6.78
F	AtmN/N; Aptx+/+	GE3	120	21.1	200317	11.76	9.08	10.2
F	AtmN/N; Aptx+/+	GH3	120	20.95	200317	7.97	9.01	7.37
F	AtmN/N; Aptx+/+	GH3	120	22.15	200421	8.89	8.78	8.01
M	AtmN/N; Aptx+/+	GH3	120	27.2	191119	9.62	7.26	5.81
M	AtmN/N; Aptx+/+	GH3	120	27.65	191209	9.63	9.77	8.08
M	AtmN/N; Aptx+/+	GH3	120	22.75	191223	10.01	32.66	35.88
M	AtmN/N; Aptx+/+	GE3	120	30.05	200123	13.7	19.02	11.25
M	AtmN/N; Aptx+/+	GE3	120	28.45	200203	8.94	6.78	7.59
M	AtmN/N; Aptx+/+	GE3	120	29.05	200203	6.37	6.96	8.15
M	AtmN/N; Aptx+/+	GH3	120	28.25	200227	5.31	4.91	7.44
M	AtmN/N; Aptx+/+	GH3	120	29.35	200415	6.32	7.52	13.9
M	AtmN/N; Aptx+/+	GH3	120	28.5	200415	8.38	7.45	8.89
M	AtmN/N; Aptx+/+	GE3	120	28.9	200429	4.9	4.26	3.95
M	AtmN/Wt; Aptx-/-	120	120	26.1	190902	5.06	5.46	4.96
M	AtmN/Wt; Aptx-/-	120	120	33.15	200123	10.09	10.58	7.06
F	AtmWt/Wt; Aptx-/-	GH3	120	22.2	190524	19.41	18.2	17.93
F	AtmWt/Wt; Aptx-/-	GH3	120	23.2	190524	10.71	7.28	6.84
F	AtmWt/Wt; Aptx-/-	GH3	120	21.4	190524	8.26	9.34	10.03
F	AtmWt/Wt; Aptx-/-	GH3	120	20.4	190524	30	30	30
F	AtmWt/Wt; Aptx-/-	GH3	120	20.15	190524	9.27	8.53	9.33
F	AtmWt/Wt; Aptx-/-	GH3	120	23.75	190604	14.88	10.32	9.64
F	AtmWt/Wt; Aptx-/-	GE3	120		190725	10.19	11.71	13.96
F	AtmWt/Wt; Aptx-/-	GE3	120		190725	10.1	6.19	12.37
F	AtmWt/Wt; Aptx-/-	GE3	120	18.2	190821	10.72	13.21	12.48
F	AtmWt/Wt; Aptx-/-	GE3	120	22.5	190821	10.52	7.76	6.96
M	AtmWt/Wt; Aptx-/-	GH3	120	28.35	190604	10.59	9.28	7.46
M	AtmWt/Wt; Aptx-/-	GH3	120	26.8	190604	13.41	11.38	8.63
M	AtmWt/Wt; Aptx-/-	GH3	120	25.55	190604	30	10.51	8.13
M	AtmWt/Wt; Aptx-/-	GH3	120		190624	6.64	7.62	6.19
M	AtmWt/Wt; Aptx-/-	GE3	120	30.3	190808	9.82	9.87	12.37
M	AtmWt/Wt; Aptx-/-	GE3	120	29.4	190902	8.32	8.34	6.78
M	AtmWt/Wt; Aptx-/-	GH3	120	30.5	191119	4.47	4.45	3.76
F	AtmWt/Wt; Aptx+/+	GH3	120	25.5	190604	7.66	6.87	6.32
F	AtmWt/Wt; Aptx+/+	GH3	120		190624	8.45	6.58	6.4
F	AtmWt/Wt; Aptx+/+	GH3	120		190624	7.35	6.83	5.95
F	AtmWt/Wt; Aptx+/+	GH3	120		190624	7.84	7.9	9.19
F	AtmWt/Wt; Aptx+/+	GE3	120	23.25	191107	8.59	10.08	6.7
F	AtmWt/Wt; Aptx+/+	GE3	120	19.8	191107	9.1	9.75	9.59
F	AtmWt/Wt; Aptx+/+	GH3	120	22.95	200421	7.16	6.52	4.9
M	AtmWt/Wt; Aptx+/+	GH3	120	28.4	190604	12.08	5.62	5.83
M	AtmWt/Wt; Aptx+/+	GE3	120	24.9	190919	7.6	5.03	5.69
M	AtmWt/Wt; Aptx+/+	GE3	120	21.18	190919	7.6	7.37	7
M	AtmWt/Wt; Aptx+/+	GE3	120	21.95	190919	12.85	9.63	6.7
M	AtmWt/Wt; Aptx+/+	GH3	120	30.35	200227	8.84	6.63	6.28
F	AtmN/N; Aptx-/-	GE4	210		190725	7.97	8.95	9.02
F	AtmN/N; Aptx-/-	GH4	210	17.6	191022	10.87	11.41	10.47
F	AtmN/N; Aptx-/-	GH4	210	18.05	191022	9.26	7.2	9.26
F	AtmN/N; Aptx-/-	GH4	210	20.1	191119	8.63	11.45	9.97
F	AtmN/N; Aptx-/-	GE4	210	18.8	191119	7.78	11.33	9.76
F	AtmN/N; Aptx-/-	GH4	210	17.05	200401	5.94	6.62	7.57
F	AtmN/N; Aptx-/-	GH4	210	19.35	200401	6.02	4.76	5.25
M	AtmN/N; Aptx-/-	GH4	210		191003	4.8	5	4.27
M	AtmN/N; Aptx-/-	GH4	210	25.4	191028	8.58	8.4	7.69
M	AtmN/N; Aptx-/-	GH4	210	30.55	191028	8.78	7.03	6.62
M	AtmN/N; Aptx-/-	GE4	210	24.2	191223	10.18	8.2	9.7
M	AtmN/N; Aptx-/-	GE4	210	24.3	200123	8.88	8.63	8.91
M	AtmN/N; Aptx-/-	GE4	210	26.45	200123	6.57	4.82	7.9
M	AtmN/N; Aptx-/-	GH4	210	19.9	200401	30	30	30
F	AtmN/N; Aptx+/+	GH4	210	20.9	200123	8.77	8.09	8.87
F	AtmN/N; Aptx+/+	GH4	210	21.4	200123	8.32	7.7	8.76
F	AtmN/N; Aptx+/+	GH4	210	25.05	200123	6.58	7.45	7.27
F	AtmN/N; Aptx+/+	GH4	210	24.8	200203	9.15	6.39	6.34
F	AtmN/N; Aptx+/+	GH4	210	23.3	200203	10.89	6.75	9.88
F	AtmN/N; Aptx+/+	GH4	210	19.35	200203	7.71	5.84	6.58
F	AtmN/N; Aptx+/+	GE4	210	22.85	200309	6.63	7.53	9.22
M	AtmN/N; Aptx+/+	GE4	210	29.2	200110	24.7	10.88	9.71
M	AtmN/N; Aptx+/+	GH4	210	25.8	200123	11.83	7.82	7.77
M	AtmN/N; Aptx+/+	GH4	210	26.85	200123	6.2	5.82	5.26
M	AtmN/N; Aptx+/+	GH4	210	30.75	200123	6.22	6.32	5.33
M	AtmN/N; Aptx+/+	GH4	210	27.1	200203	3.52	3.02	2.84
M	AtmN/N; Aptx+/+	GH4	210	29.5	200212	8.76	7.25	6.65
M	AtmN/N; Aptx+/+	GE4	210	36.85	200220	9.89	9.19	9.01
M	AtmN/N; Aptx+/+	GE4	210	28.85	200302	9.71	9.27	9.35
F	AtmN/Wt; Aptx-/-	GH4	210		191003	12.06	11.39	15.77
F	AtmN/Wt; Aptx-/-	GH4	210		191008	5.25	6.41	5.4
M	AtmN/Wt; Aptx-/-	GE4	210	27.3	191106	6.64	5.68	6.59
M	AtmN/Wt; Aptx-/-	GE4	210	34.85	191118	12.51	15.83	30
F	AtmN/Wt; Aptx+/+	GH4	210	24.65	191028	10.71	6.38	6
F	AtmN/Wt; Aptx+/+	GH4	210	23.05	200110	10.5	12.39	8.01
F	AtmN/Wt; Aptx+/+	210	210	25.15	200309	5.02	4.37	6.02
M	AtmN/Wt; Aptx+/+	GH4	210		191008	7.69	5.68	6.95
F	AtmWt/Wt; Aptx-/-	GH4	210		190924	12	11.5	9.59
F	AtmWt/Wt; Aptx-/-	GH4	210		190924	7.26	7.4	10.83
F	AtmWt/Wt; Aptx-/-	GH4	210		190924	15.09	12.78	13.09
F	AtmWt/Wt; Aptx-/-	GH4	210		190924	10.07	8.33	9.14
F	AtmWt/Wt; Aptx-/-	GH4	210		191003	4.89	5.27	4.45
F	AtmWt/Wt; Aptx-/-	GE4	210	34.6	191028	10.82	9.45	11.81
F	AtmWt/Wt; Aptx-/-	GE4	210	21.1	191028	14.6	18.93	21.46
F	AtmWt/Wt; Aptx-/-	GE4	210	26.75	191028	6.21	5.01	5.45
F	AtmWt/Wt; Aptx-/-	GE4	210	19.85	191106	7.96	7.78	7
M	AtmWt/Wt; Aptx-/-	GH4	210		190924	9.06	9.21	9.08
M	AtmWt/Wt; Aptx-/-	GH4	210		190924	9.94	10.57	13.82
M	AtmWt/Wt; Aptx-/-	GE4	210	32.1	191003	15.19	12.37	13.77
M	AtmWt/Wt; Aptx-/-	GE4	210	27.55	191003	8.63	8.31	9.5
M	AtmWt/Wt; Aptx-/-	GH4	210	27.25	191028	7.65	6.89	8.91
M	AtmWt/Wt; Aptx-/-	GH4	210	30	191028	7.68	7.07	8.05
M	AtmWt/Wt; Aptx-/-	GE4	210	30.8	191106	13.28	8.5	9.38
M	AtmWt/Wt; Aptx-/-	GH4	210	30.75	191219	6.64	6.02	5.47
F	AtmWt/Wt; Aptx+/+	GH4	210		190924	8.03	6.47	5.96
F	AtmWt/Wt; Aptx+/+	GH4	210		190924	7.06	11.9	15
F	AtmWt/Wt; Aptx+/+	GH4	210		191008	16.78	9.83	8.01
F	AtmWt/Wt; Aptx+/+	GH4	210		191008	11.41	7.59	6.45
F	AtmWt/Wt; Aptx+/+	GH4	210	23.5	191028	16.11	7.83	6.79
F	AtmWt/Wt; Aptx+/+	GE4	210	36.5	191119	6.21	5.82	5.47
F	AtmWt/Wt; Aptx+/+	GE4	210	24.35	191119	8.68	6.39	5.95
F	AtmWt/Wt; Aptx+/+	GH4	210	21.9	191219	10.65	11.32	11.46
F	AtmWt/Wt; Aptx+/+	GH4	210	25.4	191219	14.94	10.65	14.32
F	AtmWt/Wt; Aptx+/+	GH4	210	24.55	200110	8.7	6.94	8.07
F	AtmWt/Wt; Aptx+/+	GE4	210	21.45	200123	9.95	7.68	6.14
F	AtmWt/Wt; Aptx+/+	GE4	210	22.25	200123	5.25	4.77	4.12
M	AtmWt/Wt; Aptx+/+	GH4	210		191003	6.64	6.78	7.59
M	AtmWt/Wt; Aptx+/+	GH4	210		191003	5.59	6.38	5.08
M	AtmWt/Wt; Aptx+/+	GH4	210		191003	7.63	6.96	7.81
M	AtmWt/Wt; Aptx+/+	GH4	210		191008	11.51	9.53	7.22
M	AtmWt/Wt; Aptx+/+	GH4	210	32.05	191028	8.54	7.45	8.79
M	AtmWt/Wt; Aptx+/+	GH4	210	27.9	191028	9.25	8.03	8
M	AtmWt/Wt; Aptx+/+	GE4	210	35.45	191202	6.81	6.77	6
M	AtmWt/Wt; Aptx+/+	GE4	210	25.95	191202	7.52	5.37	5
M	AtmWt/Wt; Aptx+/+	GH4	210	38.65	191219	6.57	4.82	4.19
M	AtmWt/Wt; Aptx+/+	GE4	210	38.9	200220	5.08	5.32	4.75
M	AtmWt/Wt; Aptx+/+	GH4	210	26.15	200312	6.88	6.5	6.44
F	AtmN/N; Aptx-/-	GH1	400	19.25	191210	13.65	9.08	9.64
F	AtmN/N; Aptx-/-	GH1	400	17.4	191210	17.81	17.2	20.95
F	AtmN/N; Aptx-/-	GE1	400	16.5	191216	21.44	15.46	12.53
F	AtmN/N; Aptx-/-	GH1	400	19.6	191223	40.62	30	30
M	AtmN/N; Aptx-/-	GH1	400	22.3	191125	30	30	30
M	AtmN/N; Aptx-/-	GE1	400	26.4	191224	21.63	30	30
M	AtmN/N; Aptx-/-	GE1	400	21.75	200709	30	30	30
F	AtmN/N; Aptx+/-	GE1	400	24.3	200302	5.83	6.09	5.51
F	AtmN/N; Aptx+/-	GE1	400	28.15	200302	12	6.95	6.15
F	AtmN/N; Aptx+/+	GE1	400	27.9	200302	10.15	7.15	7.96
F	AtmN/N; Aptx+/+	GE1	400	30.65	200302	6.75	6	5.44
F	AtmN/N; Aptx+/+	GH1	400	23.2	200622	10.38	10.08	9.5
F	AtmN/N; Aptx+/+	GH1	400	21.15	200622	13.7	12.96	10.83
F	AtmN/N; Aptx+/+	GH1	400	24.35	200709	24.81	7.28	4.81
F	AtmN/N; Aptx+/+	GE1	400	22.55	200714	10.13	13.65	18.01
M	AtmN/N; Aptx+/+	GH1	400	33.9	200302	7.21	6.88	5.97
M	AtmN/N; Aptx+/+	GH1	400	31.7	200302	8.87	7.81	7.94
M	AtmN/N; Aptx+/+	GE1	400	32.8	200302	14.01	11.31	9.53
M	AtmN/N; Aptx+/+	GH1-R03	400	27.95	200309	12.81	11.95	11.94
M	AtmN/N; Aptx+/+	GH1-R03	400	29.25	200309	7.71	9.01	11.65
M	AtmN/N; Aptx+/+	GH1	400	32.55	200622	8.66	5.97	5.4
M	AtmN/N; Aptx+/+	GH1	400	31.4	200709	9.2	9.71	7.08
M	AtmN/N; Aptx+/+	GH1	400	38.45	200709	6.22	5.69	5.51
M	AtmN/N; Aptx+/+	GE1	400	35.85	200714	19.12	13.77	12.09
M	AtmN/N; Aptx+/+	GE1	400	36.9	200714	7.95	8.09	7.59
F	AtmN/Wt; Aptx-/-	GH1	400	29.15	191028	6.08	10.88	8.88
F	AtmN/Wt; Aptx-/-	GH1	400	35.55	191028	8.72	7.53	6.32
F	AtmN/Wt; Aptx-/-	GH1	400	26.2	191028	9.15	8.84	8.89
F	AtmN/Wt; Aptx-/-	GH1	400	26.5	191028	6.38	5.77	9.34
F	AtmN/Wt; Aptx-/-	GH1	400	24.55	191125	9.44	9.78	11.01
F	AtmN/Wt; Aptx-/-	GE1	400	23.5	191209	10.02	10.14	10.47
F	AtmN/Wt; Aptx-/-	GE1	400	33.95	191224	6.43	7.71	6.26
F	AtmN/Wt; Aptx-/-	GE1	400	32.1	191224	7.15	5.97	5.78
M	AtmN/Wt; Aptx-/-	GH1	400	44	191028	6.16	5.31	6.47
M	AtmN/Wt; Aptx-/-	GH1	400	37.95	191125	11.87	13.13	11.5
M	AtmN/Wt; Aptx-/-	GH1	400	34.5	191125	9.56	8.03	9.47
M	AtmN/Wt; Aptx-/-	GE1	400	36.2	191125	6.26	6.91	7.46
M	AtmN/Wt; Aptx-/-	GE1	400	32.5	191125	7.91	8.76	7.03
M	AtmN/Wt; Aptx-/-	GH1	400	37.45	191125	5.62	6.33	6.25
M	AtmN/Wt; Aptx-/-	GH1	400	34.85	191125	8.26	8.82	7.66
M	AtmN/Wt; Aptx-/-	GH1	400	33.3	191125	6.2	6.33	7.05
M	AtmN/Wt; Aptx-/-	GE1	400	29.9	191209	8.81	8.26	7.08
M	AtmN/Wt; Aptx-/-	GE1	400	34.8	191209	14.53	16.09	15.69
M	AtmN/Wt; Aptx-/-	400	400	45.8	191210	9.47	7.88	7.82
F	AtmWt/Wt; Aptx-/-	GH1	400	26.5	191028	9.46	7.2	6.7
F	AtmWt/Wt; Aptx-/-	GH1	400	24.7	191125	6.63	7.83	8.44
F	AtmWt/Wt; Aptx-/-	GH1	400	23.3	191125	7.66	9.76	8.84
F	AtmWt/Wt; Aptx-/-	GH1	400	24.35	191125	10.81	9.34	8.66
F	AtmWt/Wt; Aptx-/-	GE1	400	30.25	191224	8.38	8.32	10.16
F	AtmWt/Wt; Aptx-/-	GE1	400	28.65	191224	7.64	6.88	5.9
F	AtmWt/Wt; Aptx-/-	GE1	400	27.75	191224	7.1	6.96	7.82
F	AtmWt/Wt; Aptx-/-	GH1	400	43.75	191231	5.03	5.58	5.66
F	AtmWt/Wt; Aptx-/-	GH1	400	32.55	191231	7.5	6.64	5.88
F	AtmWt/Wt; Aptx-/-	GE1	400	22.5	200102	10.13	8.97	8.21
M	AtmWt/Wt; Aptx-/-	400	400		190924	10.9	8.27	7.46
M	AtmWt/Wt; Aptx-/-	GH1	400	37	191028	7.78	5.95	4.96
M	AtmWt/Wt; Aptx-/-	GH1	400	38.3	191028	13.22	11.13	11.2
M	AtmWt/Wt; Aptx-/-	GH1	400	21.75	191210	30	30	30
M	AtmWt/Wt; Aptx-/-	GH1	400	34.65	191231	11.18	9.6	10.27
M	AtmWt/Wt; Aptx-/-	GE1	400	45.2	200110	20.46	17.78	16.64
M	AtmWt/Wt; Aptx-/-	GE1	400	38.95	200110	9.03	7.33	8.06
M	AtmWt/Wt; Aptx-/-	GE1	400	42.7	200110	7.28	8.96	10.59
M	AtmWt/Wt; Aptx-/-	GE1	400	45.35	200110	13.56	9.82	9.51
F	AtmWt/Wt; Aptx+/+	GH1	400	37.55	191223	10.28	9.28	8.07
F	AtmWt/Wt; Aptx+/+	GH1	400	40.45	191223	5.38	5.56	5.97
F	AtmWt/Wt; Aptx+/+	GH1	400	40.1	191223	7.45	7.01	6.41
F	AtmWt/Wt; Aptx+/+	GH1	400	36.95	191223	7.78	6.96	5.94
F	AtmWt/Wt; Aptx+/+	GH1	400	35.5	191223	7.87	6.75	6.57
F	AtmWt/Wt; Aptx+/+	GH1	400	25.05	191223	10.52	8.94	7.82
F	AtmWt/Wt; Aptx+/+	GH1	400	28.9	191223	9.15	8.4	7.44
F	AtmWt/Wt; Aptx+/+	GH1	400	30.7	191223	6.95	6.01	7.59
F	AtmWt/Wt; Aptx+/+	GE1	400	27.95	191224	11.34	7.65	6.78
F	AtmWt/Wt; Aptx+/+	GE1	400	41.95	191224	9.68	5.89	4.84
F	AtmWt/Wt; Aptx+/+	GE1	400	30.9	191224	6.94	5.81	5.16
F	AtmWt/Wt; Aptx+/+	GE1	400	40.05	200102	10.63	7.46	8.65
M	AtmWt/Wt; Aptx+/+	GH1	400	36	191209	7.88	8.07	9.21
M	AtmWt/Wt; Aptx+/+	GH1	400	37.2	191209	5.46	7.45	6.15
M	AtmWt/Wt; Aptx+/+	GH1	400	36.25	191209	8.32	8.87	6.52
M	AtmWt/Wt; Aptx+/+	GH1	400	35.65	191209	9.84	8.6	8.68
M	AtmWt/Wt; Aptx+/+	GH1	400	47.8	191210	7.95	6.34	6.25
M	AtmWt/Wt; Aptx+/+	GH1	400	35.95	191210	9.01	7.27	6.83
M	AtmWt/Wt; Aptx+/+	GH1	400	35	191210	11.27	9.94	9.34
M	AtmWt/Wt; Aptx+/+	GH1	400	39.2	191210	6.77	6.26	5.95
M	AtmWt/Wt; Aptx+/+	GE1	400	30.95	191216	7.33	7.07	5.25
M	AtmWt/Wt; Aptx+/+	GE1	400	44.9	191216	5.53	5.12	4.7
M	AtmWt/Wt; Aptx+/+	GE1	400	35.45	191216	7.77	8.22	6.52
M	AtmWt/Wt; Aptx+/+	GE1	400	45.4	191216	8.58	7.22	6.59
F	AtmN/N; Aptx+/-	460	460	25.3	200309	21.16	15.32	16.03
F	AtmN/Wt; Aptx+/+	460	460	28.2	200309	21.14	13.21	9.84
F	AtmN/N; Aptx+/+	GE4		22.6	200507	10.47	11.59	19.76
F	AtmN/N; Aptx+/+	GE4		22.8	200507	11.21	15.02	18.1
F	AtmN/Wt; Aptx-/-			44.35	200528	12.56	8.72	9.69
F	AtmN/Wt; Aptx+/+			31.05	200709	13.07	10.76	10.47
				13	200312	12.21	6.78	7.94
				15.05	200312	10.2	6.35	7.31

## Sheet: SHIRPA
Date	Time Point	Mouse	Gender	ID Tag	Body Position	Spontaneous Activity	Respiration Rate	Tremor	Urination	Defecation	Transfer Arousal	Locomotor Activity	Palpebral Closure	Piloerection	Startle Response	Gait	Pelvic Elevation	Tail Elevation	Touch Escape	Avg Ledge Test	hindlimb clasping	Grip Strength	Body Tone	Pinna reflex	Corneal reflex	Toe Pinch	Wire Manoeuvre	Righting Reflex	Contact Righting Reflex	Fear
2018-08-13	1	546	F	12	4	3	2	0	1	7	4	22	0	0	1	2	1	3	1		2	3	1	2	1	3	3	0	1	0
2018-08-13	1	547	F	4	4	1	2	0	0	1	5	18	0	0	0	2	1	2	1		2	2	1	1	1	3	0	0	1	1
2018-08-13	1	549	F	12	4	3	2	0	0	8	5	18	0	0	0	2	1	3	1		0	3	1	1	1	3	3	1	1	0
2018-08-13	1	550	M	3	4	1	2	0	0	0	4	13	0	0	1	0	1	1	3	1	0	3	1	1	2	2	0	0	1	1
2018-08-13	1	551	M	3	4	2	2	0	0	3	4	19	0	0	1	0	2	2	3	0.333333	1	3	2	1	1	2	0	0	1	0
2018-08-13	1	552	M	7	4	1	2	0	0	3	5	22	0	0	1	0	2	1	3	0.666667	0	3	2	1	1	3	0	0	1	0
2018-08-13	1	553	M	11	4	2	2	0	1	4	4	17	0	0	1	0	2	1	2	2	1	2	1	1	1	3	0	0	1	0
2018-08-13	1	554	M	3	4	3	2	0	1	4	4	36	0	0	1	0	2	1	2	1.33333	0	3	2	1	1	3	0	0	1	0
2018-08-13	1	555	F	12	4	2	2	0	1	4	4	17	0	0	1	0	3	1	3	1.33333	0	1	2	1	1	3	0	0	1	1
2018-08-13	1	556	F	12	4	2	2	0	1	7	5	22	0	0	1	0	2	1	3	1.66667	0	2	2	1	1	3	0	0	1	0
2018-08-13	1	557	F	8	4	1	2	0	0	5	5	27	0	0	1	0	2	1	2	1	0	3	1	1	1	3	0	0	1	0
2018-08-13	1	560	M	3	4	2	2	0	0	4	5	29	0	0	1	0	2	1	3	0	0	3	2	1	1	3	0	0	1	0
2018-08-13	1	561	M	7	4	1	2	0	0	3	4	17	0	0	1	0	2	1	3	0	0	2	1	1	1	3	0	0	1	0
2018-08-13	1	562	M	7	4	1	3	0	0	5	5	24	0	0	1	0	2	1	2	0.333333	0	1	1	1	1	3	0	0	1	1
2018-08-13	1	563	M	11	4	2	3	0	0	3	5	14	0	0	1	0	2	1	3	1.33333	0	3	2	1	1	3	0	0	1	1
2018-08-15	1	564	F	12	4	3	2	0	0	0	5	16	0	0	1	0	3	1	3	0	0	2	2	1	2	2	0	0	1	0
2018-08-15	1	565	F	4	4	3	2	0	1	0	5	17	0	0	1	0	3	1	3	1	0	1	1	1	1	3	0	0	1	0
2018-08-15	1	566	M	3	4	2	2	0	0	2	3	10	0	0	1	0	2	1	3	2	0	3	1	1	1	3	0	0	1	1
2018-08-15	1	567	M	11	4	1	2	0	0	3	5	15	0	0	1	0	2	1	3	0.333333	0	3	2	1	1	3	0	0	1	0
2018-08-15	1	568	M	7	3	1	3	0	0	0	3	8	0	0	1	0	2	2	3	1	0	1	1	1	1	2	0	0	1	1
2018-08-15	1	569	M	11	4	3	2	0	0	4	5	18	0	0	1	0	2	1	3	1.33333	0	3	1	1	1	3	0	0	1	0
2018-08-15	1	570	M	3	4	3	2	0	0	3	5	26	0	0	1	0	2	1	2	1	0	1	1	1	1	2	0	0	1	0
2018-08-15	1	586	F	4	4	2	3	0	1	4	5	19	0	0	1	0	3	1	3	0	0	1	1	1	1	2	0	0	1	1
2018-08-15	1	591	M	11	4	2	2	0	0	4	4	18	0	0	1	1	2	1	2	1	2	2	1	1	1	3	0	0	1	1
2018-08-15	1	592	M	11	4	1	3	0	0	3	5	21	0	0	1	0	2	1	3	1	0	3	2	1	1	3	0	0	1	0
2018-08-15	1	593	M	11	4	1	2	0	0	5	3	16	0	0	1	0	2	1	1	0.333333	0	2	1	1	1	2	0	0	1	1
2018-08-25	1	625	F	4	4	2	2	0	0	3	4	27	0	0	1	0	3	1	3	0.333333	0	3	1	1	1	3	0	0	1	1
2018-08-25	1	626	F	12	4	3	3	0	0	2	4	24	0	0	1	0	3	1	3	0	0	1	1	1	1	3	0	0	1	1
2018-09-04	1	628	F	2	4	3	2	0	0	1	5	26	0	0	1	0	3	1	3	1.33333	0	2	1	1	1	3	1	0	1	0
2018-09-04	1	632	M	13	4	2	2	1	0	0	3	13	0	0	1	0	2	1	3	0	0	3	1	1	1	3	1	0	1	1
2018-09-12	1	633	F	12	4	2	3	1	0	5	5	25	0	0	1	0	2	1	3	0	0	2	1	1	1	3	0	0	1	0
2018-09-12	1	634	F	12	5	2	3	1	0	4	5	34	0	0	1	0	3	1	3	2	0	3	1	1	1	3	0	0	1	0
2018-09-12	1	638	M	11	4	1	3	0	0	4	3	15	0	0	1	0	1	1	2	0.333333	0	3	1	1	1	3	0	0	1	1
2018-09-12	1	639	M	7	4	1	3	1	1	3	4	20	0	0	1	0	2	1	3	2	0	2	1	1	1	3	0	0	1	1
2018-09-12	1	640	F	8	4	1	3	1	0	3	5	26	0	0	1	0	2	1	3	2	0	1	1	1	1	3	0	0	1	0
2018-09-12	1	641	F	8	4	3	2	0	1	2	5	37	0	0	2	0	2	1	3	1.33333	0	1	1	1	1	2	0	0	1	0
2018-09-12	1	645	M	11	3	1	3	1	0	4	4	20	0	0	1	0	2	1	3	0	2	2	1	1	1	3	0	0	1	1
2018-09-12	1	646	M	7	4	2	2	0	0	3	5	28	0	0	2	0	2	1	3	1	0	1	1	1	1	3	0	0	1	0
2018-09-14	1	647	F	12	4	2	3	0	0	5	4	21	0	0	1	0	2	1	2	0	1	2	1	1	1	2	0	0	1	0
2018-09-14	1	648	F	4	4	2	3	0	0	5	4	24	0	0	1	0	2	1	3	0.333333	2	3	1	1	1	3	0	0	1	0
2018-09-14	1	649	F	4	4	2	3	0	0	4	4	20	0	0	1	0	3	1	3	0.666667	0	3	1	1	1	2	0	0	1	1
2018-09-14	1	650	M	3	3	1	3	0	0	2	5	20	0	0	1	0	2	1	3	0.666667	2	2	1	1	1	3	0	0	1	1
2018-09-14	1	651	M	7	4	1	3	0	0	4	4	25	0	0	1	0	2	1	3	1.66667	0	2	1	1	1	3	0	0	1	1
2018-09-14	1	652	M	11	4	2	2	0	0	2	4	17	0	0	1	0	2	1	3	2.33333	2	3	1	1	1	3	0	0	1	1
2018-09-20	1	653	F	12	4	2	2	0	0	5	5	24	0	0	1	0	2	1	3	0	0	1	1	1	1	3	0	0	1	0
2018-09-20	1	654	F	8	4	2	2	0	0	4	3	20	0	0	1	0	2	1	3	1.33333	0	3	1	1	1	3	0	0	1	1
2018-09-20	1	655	F	8	4	1	2	1	0	5	4	24	0	1	1	0	3	1	2	1	0	2	1	1	1	3	0	0	1	1
2018-09-20	1	656	M	7	4	3	3	0	0	5	4	25	0	0	1	0	1	1	1	0.666667	0	1	1	2	1	3	0	0	1	0
2018-09-20	1	657	M	11	4	2	2	0	0	5	5	26	0	0	1	0	1	1	3	0	0	3	2	1	1	3	0	0	1	0
2018-09-20	1	658	M	3	4	3	2	0	0	6	5	13	0	0	1	0	2	1	3	0.666667	2	2	1	2	1	2	0	0	1	0
2018-09-20	1	659	F	12	4	1	2	0	0	2	4	26	0	0	1	0	2	1	3	1	0	3	1	1	1	2	0	0	1	1
2018-09-20	1	660	M	7	4	3	2	1	0	3	4	30	0	0	1	1	3	1	3	0	0	3	1	1	1	3	0	0	1	0
2018-09-20	1	661	M	3	4	2	2	0	1	5	4	25	0	0	1	0	2	1	3	0	0	3	1	1	1	3	0	0	1	0
2018-09-20	1	662	M	11	4	2	3	0	0	1	4	21	0	0	1	0	1	1	2	0	2	1	1	1	1	3	0	0	1	1
2018-09-20	1	663	M	3	4	1	3	0	0	4	5	25	0	0	1	0	1	1	3	1.66667	0	2	1	1	1	3	0	0	1	0
2018-09-20	1	664	F	12	4	3	3	0	1	4	5	30	0	0	1	0	2	1	3	0	0	2	1	1	1	3	0	1	1	0
2018-09-20	1	665	F	8	3	1	3	1	0	0	4	10	0	1	1	1	3	1	3	1	0	2	1	1	1	3	0	1	1	1
2018-09-20	1	666	M	7	4	1	2	1	0	1	4	18	0	1	1	1	2	1	3	0.333333	0	3	1	1	1	3	0	0	1	0
2018-09-20	1	667	M	11	4	1	3	1	0	2	5	29	0	0	2	0	3	1	2	0.666667	0	2	1	1	1	3	0	0	1	0
2018-09-20	1	668	M	3	4	3	3	0	0	2	3	17	0	0	2	0	2	1	3	1.66667	0	2	1	1	1	3	0	0	1	1
2018-09-20	1	669	M	3	4	3	2	1	0	0	4	26	0	0	1	0	3	1	3	1.66667	0	2	1	1	1	3	0	0	1	0
2018-09-27	1	672	F	8	4	3	2	0	0	1	4	20	0	0	2	0	2	1	3	0	0	3	1	1	1	3	0	0	1	1
2018-09-27	1	673	M	3	4	2	2	0	0	1	4	24	0	0	1	0	2	1	2	0.666667	0	2	1	1	1	3	0	0	1	0
2018-09-27	1	674	M	11	4	3	2	0	0	2	4	21	0	0	3	0	2	1	3	1.33333	0	3	1	1	1	3	0	0	1	0
2018-09-27	1	676	F	2	4	3	3	0	1	1	5	37	0	0	1	0	3	1	2	2	0	1	1	1	1	2	0	0	1	0
2018-09-27	1	677	M	13	4	2	3	0	0	4	5	29	0	0	1	0	2	1	3	0.666667	0	2	1	1	1	2	0	0	1	0
2018-09-27	1	678	M	13	4	3	3	0	0	3	4	16	0	0	1	0	2	1	3	0	0	3	1	1	1	3	0	0	1	0
2018-09-27	1	679	M	13	4	2	2	2	0	3	5	34	0	0	1	0	2	1	3	0	0	3	1	1	1	3	0	1	1	0
2018-09-27	1	680	M	1	4	2	2	0	1	2	5	27	0	0	1	0	2	1	2	0.333333	1	1	1	1	2	4	0	0	1	0
2018-09-27	1	681	M	1	4	3	3	0	1	7	5	24	0	0	1	0	2	1	2	0	1	2	1	1	1	3	1	0	1	0
2018-09-27	1	682	M	13	4	2	2	0	1	3	4	30	0	0	1	0	2	1	3	0	1	2	1	1	1	2	0	0	1	0
2018-10-02	1	685	M	7	4	3	2	1	1	7	5	28	0	1	1	0	1	1	2	0.333333	2	2	1	1	1	3	0	0	1	0
2018-10-02	1	686	M	7	4	2	3	1	1	9	4	14	0	1	1	0	1	1	2	0	2	2	1	1	1	3	0	0	1	1
2018-10-02	1	687	M	7	4	2	2	1	1	4	5	27	0	1	1	0	2	1	1	0.333333	2	1	1	2	1	3	0	0	1	1
2018-10-02	1	689	M	7	4	1	3	0	0	5	5	27	0	1	1	0	1	1	3	0.333333	0	2	1	1	1	3	0	0	1	1
2018-10-12	1	694	F	12	4	2	2	0	0	6	4	25	0	0	1	0	2	1	3	0	0	3	1	2	1	3	0	0	1	1
2018-10-12	1	695	F	8	4	2	2	1	0	7	5	26	0	0	1	0	2	1	3	0.333333	0	3	1	1	1	2	1	1	1	0
2018-10-12	1	696	F	4	3	2	3	0	0	0	4	18	0	1	3	0	3	1	3	1.33333	1	3	1	1	1	3	3	1	1	1
2018-10-12	1	697	F	4	4	3	2	0	1	1	4	22	0	0	1	0	3	1	3	1	2	3	1	1	1	3	0	0	1	0
2018-10-12	1	698	F	8	3	1	2	1	0	5	4	24	0	1	3	0	2	1	3	0	1	3	1	1	1	3	0	0	1	1
2018-10-12	1	699	M	7	4	2	2	0	0	2	3	19	0	1	3	0	2	1	2	0	0	3	1	1	1	3	0	0	1	1
2018-10-12	1	700	M	3	4	3	3	0	0	0	3	22	0	0	1	0	2	1	2	0	0	2	1	1	1	3	0	1	1	1
2018-10-12	1	701	M	11	4	2	2	0	0	6	3	17	0	1	1	0	2	1	3	0.333333	1	3	1	2	2	3	0	0	1	1
2018-10-12	1	702	F	8	4	2	3	1	0	4	5	21	0	1	2	0	2	1	3	0.333333	0	3	1	1	1	3	0	0	1	1
2018-10-12	1	703	M	11	4	2	3	0	0	4	5	21	0	0	1	0	2	1	2	1	0	3	1	1	1	3	0	0	1	0
2018-10-12	1	704	M	7	4	2	2	1	0	3	5	27	0	1	1	0	1	1	3	0.666667	2	3	1	1	1	2	1	0	1	0
2018-10-12	1	705	M	11	4	3	3	0	0	2	4	28	0	0	2	0	2	1	2	0	0	2	1	1	1	3	0	0	1	0
2018-10-12	1	706	F	4	4	3	3	0	0	3	5	22	0	0	1	0	2	1	3	2	1	3	1	1	1	2	0	0	1	0
2018-10-12	1	707	F	12	4	3	2	0	0	3	5	24	0	0	2	0	2	1	3	0	1	3	1	1	1	2	0	0	1	0
2018-10-12	1	708	F	8	4	2	2	1	0	5	4	18	0	0	2	0	2	1	2	1.66667	0	3	1	1	1	3	0	0	1	1
2018-10-12	1	709	F	12	4	3	2	1	0	7	3	17	0	0	3	0	2	1	2	1	0	2	1	1	1	3	0	0	1	1
2018-10-12	1	710	F	8	4	2	3	1	0	5	5	22	0	0	2	0	2	1	2	0	0	2	1	1	2	3	0	0	1	0
2018-10-12	1	711	F	12	4	2	3	0	0	6	4	24	0	0	1	0	2	1	2	0	0	3	1	1	1	3	0	0	1	0
2018-10-12	1	712	M	3	4	2	2	1	0	0	3	11	0	0	1	0	2	1	3	0.333333	0	2	1	1	1	4	0	0	1	0
2018-10-17	1	714	F	4	4	3	3	0	0	6	4	17	0	0	2	0	2	1	3	0.666667	2	2	1	2	1	3	0	0	1	1
2018-10-17	1	717	M	11	4	3	3	1	1	3	5	23	0	1	1	0	2	1	3	0	2	3	1	2	1	3	0	0	1	1
2018-10-17	1	718	M	3	4	3	2	1	0	4	3	31	0	0	1	0	2	1	3	0	0	3	1	1	1	4	1	0	1	0
2018-10-17	1	719	F	14	4	3	3	0	1	7	5	25	0	1	3	0	2	1	3	0.666667	0	3	1	1	1	3	1	0	1	1
2018-10-17	1	720	M	1	4	2	3	1	0	5	3	17	0	1	1	0	2	1	3	0.666667	0	2	1	1	1	3	0	0	1	1
2018-10-17	1	721	M	5	4	2	3	0	1	8	5	14	0	1	3	0	2	1	3	1.33333	2	2	1	1	1	3	0	0	1	1
2018-10-17	1	722	M	1	4	2	3	1	0	4	5	22	0	1	2	0	2	1	2	1	2	2	2	1	1	3	0	0	1	1
2018-10-17	1	723	M	1	4	2	3	1	0	11	4	22	0	0	1	0	2	1	2	0.666667	0	3	1	1	1	3	0	0	1	1
2018-10-19	1	725	F	8	4	1	3	2	0	2	2	6	0	1	1	0	2	1	3	1.66667	1	1	1	1	1	3	0	0	1	1
2018-10-19	1	729	M	3	4	3	3	0	0	5	5	26	0	0	1	0	2	1	2	0.333333	0	3	1	1	1	3	0	0	1	0
2018-10-19	1	730	M	7	4	3	3	1	1	4	5	21	0	0	1	0	2	1	1	0.333333	2	3	1	2	1	3	0	0	1	0
2018-10-19	1	731	M	7	4	1	2	0	0	2	5	24	0	0	1	0	2	1	3	0.333333	0	4	2	1	2	2	0	0	1	1
2018-10-19	1	733	F	14	4	2	3	0	0	2	5	17	0	0	1	0	3	1	3	1	1	3	1	1	1	3	0	0	1	0
2018-10-19	1	735	F	2	4	2	3	0	0	4	5	16	0	0	1	0	2	1	2	0	0	3	1	1	1	3	0	1	1	0
2018-10-19	1	737	F	14	4	2	3	0	1	4	5	22	0	1	1	0	3	1	2	0	1	3	1	1	1	3	0	0	1	0
2018-10-19	1	741	M	1	4	3	2	0	0	4	5	25	0	1	2	0	2	1	3	0.666667	0	3	1	1	1	3	0	1	1	0
2018-10-19	1	742	M	13	4	3	3	0	1	5	5	21	0	0	1	0	2	1	3	0	1	2	1	1	1	3	0	0	1	0
2018-10-19	1	745	M	13	4	3	3	0	0	2	3	17	0	0	1	0	3	1	1	0	0	3	1	1	1	3	0	0	1	0
2018-10-26	1	747	F	14	3	1	3	1	0	4	2	10	0	0	1	0	1	1	1	1	2	3	1	1	2	3	0	1	1	1
2018-10-26	1	748	F	2	4	3	2	0	0	4	5	25	0	1	1	0	2	1	3	0.666667	0	3	1	1	1	3	0	0	1	1
2018-10-26	1	749	F	6	4	3	2	0	0	5	3	25	0	0	2	0	2	1	2	0.333333	1	3	1	1	1	3	0	0	1	0
2018-10-26	1	750	M	13	4	3	3	0	1	4	5	29	0	0	1	0	2	1	2	0.333333	2	3	1	2	1	3	0	0	1	0
2018-10-26	1	751	M	1	4	3	2	0	1	7	5	27	0	0	1	0	2	1	3	1	0	3	1	1	1	2	0	0	1	0
2018-10-26	1	752	M	13	5	3	3	0	0	5	5	21	0	1	1	0	2	1	3	0	0	3	2	2	1	3	0	0	1	0
2018-10-26	1	753	F	8	3	1	2	0	0	2	2	11	0	0	1	0	2	1	3	0.333333	0	3	1	2	2	3	0	0	1	1
2018-10-26	1	754	F	8	4	1	2	0	0	3	5	28	0	0	1	0	2	1	2	0.666667	0	4	1	1	2	4	0	0	1	0
2018-10-26	1	755	F	4	5	3	3	0	0	2	5	25	0	0	2	0	2	1	3	0.666667	0	3	1	1	1	2	0	0	1	0
2018-10-26	1	756	M	11	4	1	2	0	0	5	3	21	0	0	1	0	2	1	2	0.333333	0	3	1	1	1	3	1	0	1	1
2018-10-26	1	757	M	11	4	1	3	0	1	3	4	27	0	0	1	0	2	1	2	1.33333	2	3	1	1	1	2	0	0	1	1
2018-10-26	1	764	F	4	4	2	3	0	0	1	5	23	0	0	2	0	2	1	3	1	1	3	1	1	1	3	1	0	1	0
2018-10-26	1	767	F	4	4	2	2	1	0	5	4	19	0	0	2	0	2	1	2	0	2	2	1	1	2	3	0	0	1	1
2018-10-26	1	774	F	4	3	1	2	0	1	1	3	7	0	1	1	0	2	1	3	0.666667	0	3	1	1	1	3	0	0	1	1
2018-10-26	1	776	M	3	4	2	3	0	0	3	3	17	0	0	2	0	2	1	2	0.666667	0	3	1	1	1	3	0	0	1	0
2018-11-08	1	796	M	13	4	2	2	0	1	4	4	20	0	0	1	0	2	1	1	1.33333	0	3	1	1	1	3	0	0	1	0
2018-11-08	1	797	M	13	4	2	3	0	1	4	5	35	0	0	1	0	2	1	1	0	0	3	2	1	1	3	1	0	1	0
2018-11-08	1	798	M	1	4	2	3	0	1	4	5	26	0	0	1	0	2	1	2	1.66667	1	3	1	1	1	3	1	0	1	0
2018-11-08	1	799	M	1	4	2	2	0	1	3	4	28	0	0	1	0	2	1	3	1.33333	0	2	1	1	1	2	1	0	1	1
2018-11-08	1	800	M	1	4	3	2	0	1	5	4	26	0	0	1	0	2	1	2	1	2	2	1	1	1	3	0	0	1	0
2018-11-08	1	801	M	1	4	2	2	0	0	4	5	23	0	1	1	0	1	1	3	0	1	3	2	1	1	3	0	0	1	1
2018-11-08	1	802	M	13	4	2	3	0	0	0	5	22	0	1	2	0	2	1	3	1	0	3	1	1	1	3	0	0	1	1
2018-11-15	1	811	F	14	4	3	2	0	1	4	5	19	0	0	2	0	3	1	3	2	0	2	1	1	1	3	0	1	0	0
2018-11-15	1	812	M	13	4	2	2	0	0	4	4	27	0	0	1	0	2	1	3	2	0	3	2	1	1	2	0	0	1	0
2018-11-15	1	813	M	13	4	2	2	0	0	1	4	15	0	0	1	0	2	1	3	1.66667	1	2	1	1	1	3	0	0	1	0
2018-11-15	1	814	M	1	4	3	2	0	0	3	4	26	0	0	1	0	2	1	1	0.666667	2	2	1	1	1	2	0	0	1	0
2018-11-15	1	815	F	4	4	2	2	0	0	6	5	23	0	0	2	0	2	1	3	1.66667	2	3	1	1	1	3	0	1	1	1
2018-11-15	1	816	F	8	4	1	2	2	0	4	5	26	0	0	1	0	2	1	3	0	0	3	1	1	1	3	0	0	1	1
2018-11-15	1	821	F	2	4	2	2	0	1	4	3	21	0	0	1	0	2	1	3	2	0	3	1	1	1	3	0	0	1	0
2018-11-15	1	822	F	14	4	2	2	0	1	8	4	19	0	0	1	0	2	1	3	1	1	3	1	1	1	3	0	0	1	0
2018-11-15	1	823	F	8	4	1	3	1	0	8	4	18	0	0	2	0	2	2	1	1	0	3	1	1	1	3	0	0	1	1
2018-11-15	1	825	M	13	4	1	3	0	0	3	3	9	0	0	1	0	2	1	3	0.333333	0	3	1	1	1	3	0	0	1	1
2018-11-28	1	864	F	8	3	1	3	1	0	4	4	10	0	1	1	1	1	2	1	0.666667	0	2	1	2	1	2	0	1	1	1
2018-11-28	1	865	F	14	4	2	2	0	0	10	5	23	0	0	1	0	2	1	2	0.333333	1	3	1	1	1	2	0	1	1	1
2018-11-28	1	866	F	10	4	2	2	0	0	2	5	23	0	0	2	0	2	1	2	0.333333	0	2	1	2	1	3	0	1	1	1
2018-11-28	1	868	F	6	4	2	2	0	0	4	5	20	0	0	1	0	3	1	3	0	0	2	1	1	1	2	0	0	1	0
2018-12-10	1	873	F	2	5	4	3	0	0	3	5	28	0	0	2	0	3	1	3	0.333333	0	3	1	1	1	2	0	0	1	0
2018-12-10	1	874	F	2	4	2	2	0	1	0	4	23	0	0	1	0	2	1	3	0	0	2	1	1	1	1	0	1	1	1
2018-12-10	1	875	F	2	4	2	3	0	0	2	4	25	0	0	1	0	3	1	1	0.666667	0	3	1	1	1	1	0	1	1	1
2018-12-10	1	876	F	2	4	3	2	0	0	5	5	25	0	0	2	0	2	1	3	0.666667	0	2	1	1	1	3	0	1	1	0
2018-12-10	1	877	F	2	4	3	2	0	0	2	5	26	0	0	1	0	2	1	3	0	1	3	1	1	1	3	0	1	1	0
2018-12-10	1	878	F	2	5	2	2	0	0	1	4	23	0	0	1	0	3	1	3	0.333333	0	3	1	1	1	3	1	1	1	1
2018-12-10	1	885	M	1	4	2	2	0	0	3	5	25	0	0	1	0	2	1	3	0	1	3	1	1	1	3	0	0	1	0
2018-12-10	1	887	M	1	4	3	2	0	0	4	4	23	0	0	1	0	2	1	3	1	1	3	1	1	1	3	0	1	1	0
2018-12-10	1	897	F	14	4	3	3	0	1	5	5	26	0	0	2	0	2	2	3	0.666667	3	3	1	1	1	2	0	1	1	1
2018-12-10	1	898	F	14	4	1	2	1	1	0	5	15	0	1	2	1	2	1	2	1	3	2	2	1	1	2	0	1	1	1
2018-12-10	1	899	F	14	4	2	2	0	0	3	3	22	0	0	1	0	2	1	3	0.333333	0	3	1	1	1	2	0	0	1	1
2018-12-10	1	900	F	14	4	2	3	0	0	1	5	27	0	0	1	0	3	1	3	0	0	3	1	1	1	3	0	0	1	0
2018-12-10	1	901	M	13	4	2	2	0	1	4	4	21	0	0	1	0	2	1	3	0.333333	3	3	1	1	1	3	0	0	1	0
2018-12-10	1	902	M	5	4	3	2	0	1	3	5	24	0	0	1	0	2	1	2	0.666667	0	3	1	1	1	2	0	1	1	0
2018-12-10	1	903	M	1	4	2	3	1	0	5	5	25	0	0	1	0	2	1	3	0.333333	1	3	1	1	1	2	0	0	1	0
2018-12-10	1	904	M	1	4	3	3	0	1	4	4	23	0	0	1	0	3	1	3	1	2	3	1	1	1	3	0	1	1	0
2018-12-11	1	910	F	2	4	2	2	0	1	4	5	28	0	0	1	0	3	1	3	1.33333	2	3	1	1	1	3	0	0	1	0
2018-12-11	1	911	F	2	4	2	2	0	0	6	5	26	0	0	1	0	3	1	3	1	2	3	1	1	1	3	0	1	1	0
2018-12-11	1	912	F	2	5	3	3	1	1	2	5	19	0	0	1	0	3	1	3	1	0	3	1	1	1	2	0	1	1	1
2018-12-11	1	913	F	2	4	2	2	0	1	7	5	22	0	0	1	0	3	2	2	0	1	3	1	1	1	3	0	0	1	1
2018-12-11	1	914	F	2	4	3	2	0	0	2	5	20	0	0	1	0	3	1	3	0.666667	1	3	1	1	1	2	0	2	1	0
2018-12-21	1	972	M	5	4	1	2	0	0	1	4	14	0	0	1	0	2	1	3	1.33333	0	3	1	1	1	3	0	0	1	1
2018-12-21	1	977	F	6	4	2	3	1	1	2	5	32	0	0	1	0	2	1	3	0.666667	0	3	1	1	1	2	0	0	1	0
2018-12-21	1	978	F	14	4	2	3	1	1	5	5	29	0	0	1	0	3	1	3	0.666667	0	2	1	1	1	3	0	0	1	1
2018-12-21	1	980	F	14	4	2	2	1	0	6	5	21	0	0	1	0	2	1	3	0.666667	0	3	1	1	1	3	0	0	1	0
2018-12-21	1	981	M	5	4	3	2	0	1	7	5	21	0	0	1	0	2	1	3	1.33333	1	2	1	1	1	3	0	0	1	0
2018-12-21	1	982	M	5	3	1	2	0	1	2	5	18	0	0	1	0	2	1	3	0.333333	2	3	1	2	1	3	0	1	1	1
2019-01-04	1	1015	M	5	4	3	2	0	1	5	3	7	0	0	1	0	3	1	2	0.666667	1	3	1	1	2	3	0	0	1	0
2019-01-04	1	1017	M	5	4	3	2	0	1	4	5	20	0	0	2	0	2	1	2	2	2	3	1	1	1	3	0	1	1	1
2019-01-15	1	1074	F	6	4	2	2	0	0	1	4	16	0	0	1	0	2	1	3	0	0	3	1	1	1	2	0	0	1	0
2019-01-15	1	1077	F	6	4	2	2	1	0	0	5	23	0	0	3	0	2	2	3	0	0	4	1	1	1	3	0	0	1	1
2019-01-15	1	1078	F	6	4	2	2	0	0	6	5	22	0	0	1	0	2	1	3	0.666667	0	3	1	1	1	3	0	0	1	0
2019-01-15	1	1096	F	6	4	2	3	1	1	2	5	28	0	0	1	0	2	1	3	1	0	2	1	1	1	3	0	0	1	1
2019-01-15	1	1102	M	5	4	3	3	0	0	5	5	19	0	0	2	0	3	1	3	1	2	3	1	1	1	3	0	0	1	0
2019-01-29	1	1139	M	9	4	3	2	0	0	1	3	12	0	0	3	1	2	2	3	0.333333	2	4	1	1	1	3	0	1	1	1
2019-01-29	1	1151	M	9	3	2	3	2	0	0	5	10	0	1	1	1	3	1	3	0	0	3	1	1	1	4	0	0	1	0
2019-02-27	1	1248	M	5	4	2	2	1	1	5	5	21	0	0	1	1	2	1	2	2	3	3	1	1	1	2	0	1	1	0
2019-02-27	1	1249	M	5	4	1	2	0	1	5	3	7	0	0	1	0	2	1	2	0	1	3	1	1	1	2	0	0	1	1
2019-02-27	1	1250	M	5	4	1	2	0	0	3	5	16	0	0	1	0	2	1	3	2	2	2	1	1	1	3	0	0	1	1
2019-02-27	1	1262	F	6	4	2	2	0	0	3	5	16	0	0	1	0	2	1	3	2.66667	0	3	1	1	1	3	0	0	1	0
2019-02-27	1	1266	M	5	4	3	2	0	0	3	5	23	0	0	1	0	2	1	3	1.66667	1	4	1	1	1	3	0	0	1	0
2019-02-27	1	1276	F	10	4	3	2	0	1	3	5	25	0	0	1	0	3	1	3	1.66667	2	3	1	1	1	3	0	0	1	0
2019-02-27	1	1277	F	10	4	2	2	1	0	2	4	10	0	0	1	1	3	1	3	2	1	3	1	1	1	3	0	0	1	1
2019-02-27	1	1278	F	10	4	2	2	1	0	3	4	24	0	0	1	0	3	1	3	2	1	3	1	1	1	3	0	0	1	0
2019-02-27	1	1280	F	10	3	1	2	0	0	0	5	25	0	0	1	0	2	1	3	2	0	2	1	1	1	3	0	0	1	0
2019-02-27	1	1284	F	10	3	2	2	0	0	3	3	7	0	0	1	0	2	1	3	1	3	2	1	1	1	3	0	0	1	1
2019-03-04	1	1306	F	6	4	3	2	0	0	7	3	21	0	0	2	0	2	1	3	1.66667	0	3	1	1	1	1	0	0	1	0
2019-03-14	1	1332	F	14	4	1	2	0	0	5	3	15	0	0	1	0	3	2	3	0.666667	0	3	1	1	1	3	0	0	1	1
2019-03-14	1	1333	F	6	4	2	2	1	1	5	5	24	0	0	2	0	3	1	3	2	2	3	2	1	1	3	0	0	1	1
2019-03-28	1	1414	F	10	4	2	2	0	1	7	5	25	0	0	1	0	2	1	2	1	2	2	1	1	1	3	0	1	1	1
2019-03-28	1	1415	F	10	4	2	2	1	0	3	3	17	0	0	1	0	2	1	3	2	1	3	1	2	1	3	0	0	1	1
2019-03-28	1	1420	M	9	4	2	2	0	1	4	4	13	0	0	1	0	2	1	3	1	2	2	1	1	1	3	0	0	1	1
2019-03-28	1	1429	F	6	4	1	2	0	0	3	5	22	0	0	1	0	2	1	3	2	0	3	1	1	1	3	0	0	1	1
2019-03-28	1	1431	F	10	4	2	2	1	0	0	4	21	0	0	2	0	3	1	3	1	1	3	2	1	1	2	0	0	1	1
2019-03-28	1	1436	M	9	4	3	2	1	0	4	5	33	0	0	1	0	3	1	3	2	0	2	1	1	1	3	0	0	1	0
2019-05-03	1	1593	F	10	4	2	2	1	0	4	4	22	0	0	1	0	2	1	3	2	1	3	1	1	1	3	0	0	1	0
2019-05-03	1	1596	M	9	4	2	2	0	0	2	2	13	0	0	1	0	2	1	2	2	0	2	1	1	1	2	0	0	1	1
2019-05-03	1	1598	M	9	4	2	2	0	0	1	5	32	0	0	1	0	2	1	2	1	1	2	1	1	1	3	0	0	1	0
2019-05-03	1	1599	F	6	4	3	2	1	1	1	5	32	0	0	1	0	2	1	1	2	0	3	1	1	1	1	0	0	1	1
2019-05-13	1	1619	F	10	4	3	2	0	0	3	4	30	0	0	1	0	2	1	2	2	0	3	1	1	1	3	0	0	1	1
2019-05-13	1	1627	F	10	4	2	3	1	1	4	5	19	0	0	1	0	2	1	3	1	1	2	1	1	1	3	0	0	1	1
2019-05-29	1	1707	M	9	4	3	2	0	1	6	4	29	0	0	1	0	3	1	3	2	3	2	1	2	1	3	0	0	1	1
2019-05-29	1	1708	M	9	4	3	2	0	0	5	4	15	0	0	2	1	1	1	3	1	1	2	1	1	1	3	0	1	1	1
2019-08-15	2	546	F	12	4	3	2	0	1	7	4	22	0	0	1	2	1	3	1	3	2	3	1	2	1	3	3	0	1	0
2019-08-15	2	547	F	4	4	1	2	0	0	1	5	18	0	0	0	2	1	2	1	3	2	2	1	1	1	3	0	0	1	1
2019-08-15	2	549	F	12	4	3	2	0	0	8	5	18	0	0	0	2	1	3	1	3	0	3	1	1	1	3	3	1	1	0
2019-08-15	2	550	M	3	4	1	2	0	0	1	3	18	0	0	0	2	2	2	1	1.33333	0	3	1	2	1	4	3	0	1	1
2019-08-15	2	551	M	3	4	2	2	0	0	3	5	25	0	0	0	2	1	3	1	2	0	3	1	1	1	3	2	0	1	0
2019-08-15	2	553	M	11	4	2	3	1	0	5	5	19	0	0	1	2	1	3	1	2	2	3	1	1	1	4	3	0	1	1
2019-08-15	2	554	M	3	4	3	2	0	0	3	5	27	0	0	0	2	2	3	1	3	0	3	1	1	1	3	3	0	1	0
2019-08-15	2	555	F	12	4	3	2	0	0	6	5	30	0	0	0	2	1	3	1	2	0	2	1	1	1	1	0	0	1	0
2019-08-15	2	556	F	12	4	3	2	0	0	5	3	29	0	0	0	2	1	1	1	1.33333	0	1	1	1	1	3	0	0	1	0
2019-08-15	2	557	F	8	3	3	3	1	0	3	5	7	0	0	2	0	2	2	1	2.66667	0	2	1	1	1	4	1	0	1	1
2019-08-15	2	560	M	3	4	2	2	1	0	3	4	28	0	0	1	3	1	3	1	3	1	2	1	1	1	3	2	1	1	0
2019-08-15	2	561	M	7	3	2	2	2	0	1	2	1	0	0	2	1	1	2	1	1.66667	1	3	1	1	2	4	1	0	1	1
2019-08-15	2	562	M	7	3	2	2	2	0	7	4	5	0	0	2	1	1	1	1	2.66667	0	3	1	1	1	4	1	0	1	0
2019-08-15	2	563	M	11	4	2	2	0	0	4	5	20	0	0	0	2	1	3	1	3	0	2	1	2	1	3	1	0	1	1
2019-08-19	2	564	F	12	4	3	2	0	0	0	5	16	0	0	0	2	1	3	1	0	0	2	1	2	1	4	0	2	1	0
2019-08-19	2	565	F	4	4	2	2	1	1	2	3	26	0	0	1	2	1	3	1	1.33333	1	2	1	1	1	3	0	0	1	0
2019-08-19	2	566	M	3	4	2	2	0	1	4	4	17	0	0	1	2	1	3	1	2	3	2	1	2	1	3	2	1	1	0
2019-08-19	2	567	M	11	4	1	2	0	1	4	3	11	0	0	0	1	1	3	1	1	3	1	1	1	1	4	0	2	1	1
2019-08-19	2	586	F	4	4	2	2	0	0	7	5	27	0	0	0	2	1	3	1	2	0	3	1	1	1	3	0	0	1	1
2019-08-19	2	568	M	7	3	1	3	2	0	2	2	1	0	1	2	1	1	1	1	2	3	3	1	1	1	3	0	0	1	1
2019-08-19	2	569	M	11	4	3	2	0	0	2	4	14	0	0	0	2	1	3	1	2	1	1	1	2	1	4	0	2	1	0
2019-08-19	2	570	M	3	4	3	2	0	0	0	4	33	0	0	0	1	1	3	1	2.33333	1	1	1	1	1	3	0	1	1	0
2019-08-19	2	591	M	11	4	2	2	0	0	5	3	14	0	1	0	2	1	3	1	2	2	2	1	2	1	3	1	0	1	1
2019-08-19	2	592	M	11	4	2	2	0	0	6	4	32	0	1	0	2	1	2	1	2	0	3	1	1	1	3	2	0	1	0
2019-08-19	2	593	M	11	4	2	2	1	0	5	5	15	0	1	0	2	1	3	1	0.333333	0	2	1	1	1	3	1	0	1	1
2019-09-03	2	625	F	4	4	3	3	0	0	0	4	22	0	1	0	2	1	3	1	1	0	2	1	1	1	3	0	0	1	1
2019-09-03	2	626	F	12	4	2	2	1	0	4	5	28	0	0	1	2	1	3	1	1	0	3	1	1	1	3	0	0	1	1
2019-09-09	2	628	F	2	4	3	2	0	0	1	2	11	0	0	0	2	1	3	1	2.33333	0	2	1	1	1	3	1	0	1	1
2019-09-09	2	632	M	13	4	2	3	0	1	0	5	24	0	0	1	2	1	3	1	2	0	2	1	1	1	3	3	0	1	0
2019-10-01	2	674	M	11	4	3	2	0	0	0	4	15	0	0	0	2	2	3	1	1	0	2	1	1	1	3	2	0	1	0
2019-10-01	2	676	F	2	4	3	2	0	0	5	5	23	0	0	0	2	1	3	1	1.66667	3	1	1	1	2	2	0	0	1	0
2019-10-01	2	677	M	13	4	3	2	0	1	6	5	11	0	0	0	2	1	3	1	1.66667	2	3	1	1	2	3	1	0	1	1
2019-10-01	2	678	M	13	4	4	2	0	1	5	4	22	0	0	0	2	1	3	1	2.33333	3	3	1	1	1	3	1	0	1	1
2019-10-01	2	679	M	13	4	3	2	0	0	4	4	19	0	0	0	2	1	1	1	1.33333	1	2	1	1	2	3	1	0	1	0
2019-10-01	2	680	M	1	4	2	2	0	0	7	5	26	0	0	0	2	1	3	1	2	2	2	1	1	1	3	0	0	1	1
2019-10-01	2	681	M	1	4	3	2	0	0	3	5	31	0	0	0	2	1	3	1	1.33333	2	2	1	1	2	3	1	1	1	0
2019-10-01	2	682	M	13	4	3	2	0	0	2	5	23	0	0	0	2	1	3	1	1	0	2	1	1	1	2	0	0	1	0
2019-10-02	2	687	M	7	4	1	2	1	0	2	3	6	0	0	1	1	2	2	1	2	0	2	1	1	1	3	2	1	1	1
2019-10-02	2	689	M	7	4	1	2	2	0	2	4	12	0	0	1	2	1	3	1	2	3	3	1	1	1	3	0	1	1	1
2019-10-17	2	694	F	12	4	3	2	0	0	10	4	21	N/A	N/A	0	2	1	N/A	N/A	1	0	2	NA	NA	NA	NA	0	0	NA	NA
2019-10-17	2	695	F	8	3	1	0	1	1	3	1	1	N/A	N/A	2	0	0	N/A	N/A	0.666667	3	2	NA	NA	NA	NA	3	2	NA	NA
2019-10-17	2	696	F	4	4	3	2	0	1	3	5	22	N/A	N/A	0	2	1	N/A	N/A	1	3	2	NA	NA	NA	NA	0	0	NA	NA
2019-10-17	2	697	F	4	4	3	2	0	1	7	4	24	N/A	N/A	0	2	1	N/A	N/A	1	0	3	NA	NA	NA	NA	0	0	NA	NA
2019-10-17	2	698	F	8	3	2	0	2	0	4	1	2	N/A	N/A	1	0	0	N/A	N/A	0.333333	1	2	NA	NA	NA	NA	2	1	NA	NA
2019-10-17	2	699	M	7	3	1	2	2	1	3	1	1	N/A	N/A	1	1	1	N/A	N/A	2	3	3	NA	NA	NA	NA	0	0	NA	NA
2019-10-17	2	700	M	3	4	3	2	0	0	1	3	25	N/A	N/A	0	2	1	N/A	N/A	1	1	3	NA	NA	NA	NA	1	0	NA	NA
2019-10-17	2	701	M	11	4	3	2	0	0	3	3	11	N/A	N/A	0	2	1	N/A	N/A	1	0	3	NA	NA	NA	NA	0	0	NA	NA
2019-10-17	2	703	M	11	4	2	3	0	0	6	5	29	N/A	N/A	0	2	1	N/A	N/A	2	0	3	NA	NA	NA	NA	1	0	NA	NA
2019-10-17	2	705	M	11	4	3	2	0	0	1	4	15	N/A	N/A	0	2	1	N/A	N/A	1.33333	1	2	NA	NA	NA	NA	2	0	NA	NA
2019-10-17	2	706	F	4	4	3	2	0	0	6	3	5	N/A	N/A	0	2	1	N/A	N/A	1	0	3	NA	NA	NA	NA	0	1	NA	NA
2019-10-17	2	707	F	12	4	1	2	0	0	5	4	29	N/A	N/A	0	2	1	N/A	N/A	0.666667	0	3	NA	NA	NA	NA	0	0	NA	NA
2019-10-17	2	708	F	8	3	1	0	0	1	7	1	1	N/A	N/A	2	0	0	N/A	N/A	1	2	1	NA	NA	NA	NA	1	1	NA	NA
2019-10-17	2	709	F	12	4	2	2	0	0	1	4	16	N/A	N/A	0	2	1	N/A	N/A	1	0	3	NA	NA	NA	NA	1	0	NA	NA
2019-10-17	2	710	F	8	3	1	2	2	0	4	3	2	N/A	N/A	1	1	2	N/A	N/A	1	0	2	NA	NA	NA	NA	1	1	NA	NA
2019-10-17	2	711	F	12	4	2	2	0	0	1	5	23	N/A	N/A	0	2	1	N/A	N/A	2	3	3	NA	NA	NA	NA	3	2	NA	NA
2019-10-17	2	712	M	3	4	2	2	0	0	2	4	16	N/A	N/A	0	2	1	N/A	N/A	1	3	2	NA	NA	NA	NA	1	0	NA	NA
2019-10-23	2	717	M	11	4	3	2	0	0	1	5	31			0	2	2			1	0	2					1	1
2019-10-23	2	719	F	14	4	3	2	0	0	5	4	12			1	2	1			1	2	3					0	0
2019-10-23	2	720	M	1	4	2	2	0	0	2	5	20			1	2	1			2.33333	1	2					1	0
2019-10-23	2	721	M	5	4	1	2	0	0	2	2	7			0	2	1			2	3	1					1	0
2019-10-23	2	722	M	1	4	2	2	0	1	3	5	18			0	1	2			2	3	2					1	0
2019-10-23	2	723	M	1	4	2	2	0	0	2	5	31			0	2	0			1.66667	0	1					1	0
2019-10-23	2	733	F	14	4	3	2	0	0	4	3	15			1	1	2			1.66667	1	3					0	0
2019-10-23	2	735	F	2	4	1	2	0	0	5	4	17			0	2	1			1	3	3					0	0
2019-10-23	2	737	F	14	4	3	2	0	1	2	3	21			0	2	1			1	0	3					0	0
2019-10-23	2	741	M	1	4	1	2	0	0	2	3	16			0	2	2			1	0	2					2	1
2019-10-23	2	742	M	13	4	4	2	0	0	3	5	11			0	2	2			2	0	3					1	0
2019-10-23	2	745	M	13	4	1	2	0	0	1	4	6			1	2	1			1.66667	0	2					2	1
2019-10-30	2	731	M	7	3	1	2	2	1	2	2	5			1	1	1			2	2	3					2	1
2019-10-30	2	747	F	14	4	2	2	2	0	2	4	17			0	2	1			2.66667	2	2					1	1
2019-10-30	2	748	F	2	3	1	0	2	0	4	1	2			1	0	0			3	2	1					3	1
2019-10-30	2	750	M	13	4	3	2	0	0	2	4	13			1	2	2			2.33333	1	2					2	0
2019-10-30	2	751	M	1	4	3	2	0	0	4	4	18			0	2	1			1	1	2					2	1
2019-10-30	2	753	F	8	4	1	0	2	0	3	5	8			1	0	2			2	0	3					1	2
2019-10-30	2	755	F	4	4	2	2	0	0	2	5	25			1	2	1			2	0	3					0	1
2019-10-30	2	756	M	11	4	1	2	1	0	4	4	14			0	2	2			1	1	3					1	0
2019-10-30	2	757	M	11	4	1	2	0	0	2	5	28			0	2	1			1	2	3					1	0
2019-10-30	2	764	F	4	4	2	2	0	0	7	5	22			0	2	1			1	0	3					2	0
2019-10-30	2	767	F	4	4	1	2	0	0	8	4	29			0	2	1			1.66667	0	2					0	0
2019-10-30	2	774	F	4	4	1	0	0	0	5	4	15			0	2	2			1	0	3					1	0
2019-10-30	2	776	M	3	4	3	2	0	0	5	4	31			0	2	1			0.666667	2	3					1	0
2019-11-04	2	796	M	13	4	2	2	0	0	3	5	25			0	2	1			1	0	3					1	0
2019-11-04	2	797	M	13	4	3	3	0	0	3	5	27			0	2	1			1	0	3					1	0
2019-11-04	2	798	M	1	4	3	2	0	0	3	4	33			0	2	1			0	3	3					2	0
2019-11-04	2	799	M	1	4	1	2	0	0	6	4	27			0	2	1			0	1	3					1	0
2019-11-04	2	800	M	1	4	3	2	0	0	0	5	19			0	2	1			1.33333	3	3					2	1
2019-11-04	2	801	M	1	4	2	3	0	0	4	5	25			0	2	1			1	1	3					2	2
2019-11-04	2	802	M	13	4	3	2	0	0	2	5	16			1	2	2			1.33333	0	3					3	1
2019-11-20	2	811	F	14	4	3	2	0	0	1	1	4			1	2	2			2.33333	0	3					1	0
2019-11-20	2	812	M	13	4	2	2	0	0	0	5	21			0	2	2			1	1	4					0	0
2019-11-20	2	813	M	13	4	3	2	0	0	1	4	10			1	2	2			2	1	2					2	0
2019-11-20	2	814	M	1	4	3	2	0	0	3	4	15			1	2	2			2	1	2					3	2
2019-11-20	2	815	F	4	4	3	3	0	1	8	5	23			0	1	2			1	1	4					0	0
2019-11-20	2	821	F	2	4	3	2	0	0	2	5	21			0	2	2			0.333333	1	3					0	0
2019-11-20	2	822	F	14	4	3	2	0	0	3	2	15			0	2	1			0.333333	1	3					0	0
2019-11-20	2	825	M	13	4	3	2	0	0	3	4	7			1	2	2			2	0	3					2	1
2019-12-03	2	865	F	14	4	3	2	0	0	3	5	21			0	2	1			1	2	2					0	0
2019-12-03	2	866	F	10	4	3	3	0	1	6	4	11			0	2	1			0.666667	2	3					0	0
2019-12-03	2	868	F	6	4	3	2	0	0	2	5	25			0	2	2			1.66667	0	3					0	0
2019-12-09	2	873	F	2	4	4	2	0	0	5	5	24			0	2	1			1	3	3					0	0
2019-12-09	2	874	F	2	4	3	2	0	0	0	5	21			0	2	1			1	0	2					1	0
2019-12-09	2	875	F	2	4	3	3	0	1	2	5	21			0	0	2			1	0	2					2	0
2019-12-09	2	876	F	2	4	2	2	0	0	6	5	16			0	2	1			2	0	3					1	0
2019-12-09	2	877	F	2	4	2	2	0	0	3	5	16			0	2	1			1	2	2					0	1
2019-12-09	2	878	F	2	4	3	2	0	0	8	5	33			0	2	1			1	0	3					1	0
2019-12-09	2	885	M	1	4	1	0	1	1	2	3	8			1	2	2			3	1	3					3	0
2019-12-09	2	887	M	1	4	2	2	0	0	5	5	17			1	3	1			2.66667	0	2					3	1
2019-12-09	2	897	F	14	4	2	2	0	0	4	5	17			0	2	2			2	3	3					2	1
2019-12-09	2	899	F	14	4	3	2	0	0	4	5	24			1	2	2			1	1	3					1	1
2019-12-09	2	900	F	14	4	3	2	0	0	1	5	12			0	2	1			1	0	3					1	2
2019-12-09	2	901	M	13	4	1	0	1	0	3	3	11			1	2	1			1.66667	3	3					2	1
2019-12-09	2	902	M	5	4	2	2	0	0	3	4	15			1	2	1			1.33333	1	2					1	1
2019-12-09	2	903	M	1	4	2	2	0	0	3	4	22			0	2	1			1.33333	1	2					2	1
2019-12-09	2	904	M	1	4	1	0	0	1	3	4	15			0	2	1			2.33333	3	3					3	1
2019-12-09	2	910	F	2	4	2	2	0	0	1	4	16			0	2	1			0	2	3					1	1
2019-12-09	2	911	F	2	4	2	2	0	0	4	3	13			0	2	1			1	2	4					0	0
2019-12-09	2	913	F	2	4	2	2	0	1	6	5	29			0	2	1			1.66667	0	3					2	0
2019-12-09	2	914	F	2	4	3	2	0	0	3	4	10			0	2	1			1.66667	0	2					1	1
2020-01-06	2	977	F	6	4	2	2	0	0	2	5	24			0	2	2			1	1	3					0	0
2020-01-06	2	978	F	14	4	3	0	0	1	4	5	21			1	2	2			1	1	2					1	1
2020-01-06	2	980	F	14	4	3	2	0	0	6	4	19			0	2	1			1	3	2					0	0
2020-01-06	2	981	M	5	4	3	2	0	0	2	3	12			0	2	2			1	0	3					0	0
2020-01-06	2	1013	F	10	4	3	2	0	0	6	4	10			0	2	2			1	1	2					0	0
2020-01-06	2	1015	M	5	4	3	2	0	1	3	4	12			0	2	1			0.666667	2	3					0	0
2020-01-06	2	1017	M	5	4	2	3	0	0	4	4	20			0	2	1			1.66667	1	2					0	1
2020-01-28	2	1074	F	6	4	1	2	1	0	4	4	26			0	2	2			1	1	2					0	0
2020-01-28	2	1096	F	6	4	3	2	0	0	3	5	34			0	2	1			1.33333	0	3					0	0
2020-01-28	2	1139	M	9	4	2	3	0	0	0	3	20			0	2	1			1	0	3					1	0
2020-02-28	2	1248	M	5	4	3	2	0	1	4	4	20			0	2	1			1	2	1					1	0
2020-02-28	2	1250	M	5	4	2	2	0	0	3	4	19			0	2	2			1	0	3					2	0
2020-02-28	2	1262	F	6	4	1	3	0	1	2	4	24			0	2	1			1.66667	3	3					1	2
2020-02-28	2	1266	M	5	4	2	3	0	2	2	3	19			0	2	1			1	2	2					1	0
2020-02-28	2	1276	F	10	4	3	2	0	1	6	5	36			0	2	1			0.333333	0	3					0	0
2020-02-28	2	1284	F	10	4	2	2	0	0	3	3	18			0	2	1			1	2	2					2	0
2020-02-28	2	1306	F	6	4	2	2	0	0	3	3	32			0	2	2			2	3	2					3	0
2020-03-02	2	1598	M	9	4	2	2	0	0	3	4	19			0	2	1			2	0	2					0	1
2020-03-03	2	1593	F	10	4	1	2	0	0	3	4	14			1	2	2			0.666667	0	3					0	0
2020-03-04	2	1708	M	9	4	1	2	0	1	0	4	1			0	1	1			1.66667	2	1					2	1
2020-06-05	2	1596	M	9	4	3	2	1	0	4	3	22			0	2	1			0.666667	0	3					0	1
2820-03-01	2	1431	F	10	4	3	2	0	0	0	4	22			0	2	1			2.33333	0	3					0	0

## Sheet: Postnatal Righting Reflex
Date	Mouse #	Gender	ID Tag#	T1 (sec.ms)	T2 (sec.ms)	T3 (sec.ms)
2018-07-19	557	F	8	30	14.35	30
2018-08-22	640	F	8	0.96	2.5	16.34
2018-08-22	641	F	8	6.09	5.06	10.25
2018-08-28	654	F	8	1.28	0.97	1
2018-08-28	655	F	8	2.16	3.28	4.78
2018-08-30	665	F	8	13.81	30	30
2018-09-04	672	F	8	3.94	9.25	1.69
2018-09-19	695	F	8	30	30	30
2018-09-19	698	F	8	30	30	22.63
2018-09-21	702	F	8	10.44	9.63	30
2018-09-21	708	F	8	0.91	30	6.69
2018-09-21	710	F	8	30	12.19	5
2018-09-28	724	F	8	1.57	3.72	1.25
2018-09-28	725	F	8	7.25	9.56	5.25
2018-10-01	727	F	8	1.53	10.81	3.54
2018-10-04	753	F	8	1.35	4.46	2.19
2018-10-04	754	F	8	3.34	6.41	3.81
2018-10-17	789	F	8	1.75	1.31	30
2018-10-17	791	F	8	2.04	1.03	16.78
2018-10-23	823	F	8	3.25	28.47	1.44
2018-11-06	864	F	8	3.35	3.65	17.66
2018-07-06	531	F	4	30	8.47	1.25
2018-07-06	532	F	4	5.53	10.25	30
2018-07-19	547	F	4	2.15	0.88	4.93
2018-07-23	565	F	4	1.66	1.43	0.87
2018-07-24	586	F	4	1.88	1.62	7.28
2018-08-07	625	F	4	2	2	3
2018-08-24	648	F	4	1.41	3.18	30
2018-08-24	649	F	4	2	6.25	1.25
2018-09-19	696	F	4	30	1.21	30
2018-09-19	697	F	4	18.25	9.97	30
2018-09-21	706	F	4	1.68	30	7
2018-09-25	714	F	4	1.72	1.06	4.75
2018-10-01	728	F	4	9	1.09	6.13
2018-10-04	755	F	4	8.65	2.56	2.09
2018-10-05	764	F	4	13.63	30	30
2018-10-05	767	F	4	5.34	3.37	9.62
2018-10-05	774	F	4	4.97	30	1.69
2018-10-17	795	F	4	6.35	4.84	30
2018-07-06	533	F	12	11.29	30	22.81
2018-07-19	546	F	12	1.78	1.88	1.47
2018-07-19	549	F	12	8.31	3.44	1.41
2018-07-19	555	F	12	15.09	3.18	6.77
2018-07-19	556	F	12	7.41	1.04	1.25
2018-07-19	558	F	12	30	2.35	7.5
2018-07-19	559	F	12	19.5	1.12	5.03
2018-07-23	564	F	12	5.32	4.69	3.53
2018-07-24	587	F	12	30	2.94	1.72
2018-07-24	588	F	12	6.38	9.66	1.25
2018-08-07	626	F	12	2	9	7
2018-08-20	633	F	12	0.89	13.63	0.78
2018-08-20	634	F	12	0.69	0.97	1
2018-08-24	647	F	12	6.25	9.44	4.16
2018-08-28	653	F	12	0.91	11.38	1.69
2018-08-29	659	F	12	1.78	1.41	3.91
2018-08-30	664	F	12	2.38	9.79	30
2018-09-04	671	F	12	6.31	1.53	1.06
2018-09-19	694	F	12	30	4.16	24.63
2018-09-21	707	F	12	30	7.62	6.72
2018-09-21	709	F	12	1.22	19.81	15.4
2018-09-21	711	F	12	3.29	30	3.22
2018-09-25	713	F	12	1.15	2.31	1.59
2018-09-25	715	F	12	2.62	1.63	2.16
2018-10-05	762	F	12	3.47	11.69	30
2018-10-05	763	F	12	1.81	12.06	4.06
2018-10-05	765	F	12	8.12	12.84	2.06
2018-10-05	766	F	12	30	7.09	30
2018-10-08	770	F	12	1.57	5.81	1
2018-10-08	772	F	12	1	17.75	30
2018-10-11	780	F	12	4.43	8.71	30
2018-10-17	790	F	12	2.56	1.63	6.97
2018-10-03	749	F	6	1.28	1.93	1.06
2018-11-06	868	F	6	1.47	2.41	1.22
2018-11-30	977	F	6	2.31	1.19	1.13
2018-08-13	628	F	2	1.09	1.06	0.94
2018-09-04	676	F	2	1.43	2.28	1.53
2018-09-28	735	F	2	5.16	1.4	1.25
2018-10-03	748	F	2	1.87	1.13	5.69
2018-10-23	821	F	2	0.75	0.66	0.87
2018-11-15	873	F	2	21.47	12.09	3.25
2018-11-15	874	F	2	3.75	6.28	2.15
2018-11-15	875	F	2	26.37	3	1.06
2018-11-15	876	F	2	2.72	1.46	25.52
2018-11-15	877	F	2	1.66	1.47	0.84
2018-11-15	878	F	2	6.66	5.12	0.9
2018-11-16	910	F	2	3.85	1.72	2.94
2018-11-16	911	F	2	30	1.41	1.34
2018-11-16	912	F	2	14.85	2.06	1.75
2018-11-16	913	F	2	1.09	2.13	0.97
2018-11-16	914	F	2	2	2	4.78
2018-11-28	953	F	2	4.88	1.78	1.59
2018-11-30	969	F	2	2.47	1.28	2.47
2018-11-30	979	F	2	1.6	1.9	1.15
2018-12-10	1018	F	2	1.1	1.93	1.41
2019-01-07	1150	F	2	1.66	1.06	0.85
2018-09-26	719	F	14	6.25	0.95	0.75
2018-09-28	732	F	14	1.4	2.31	2.75
2018-09-28	733	F	14	4.56	3.75	1.28
2018-09-28	737	F	14	7.31	12.25	1.4
2018-10-03	747	F	14	1.68	0.91	1.56
2018-10-23	811	F	14	0.72	0.72	0.63
2018-10-23	822	F	14	3.06	2.06	1.63
2018-10-30	839	F	14	0.6	0.44	3.69
2018-11-06	865	F	14	0.87	1.25	1.61
2018-11-13	897	F	14	2.16	1.44	1
2018-11-13	898	F	14	1.75	0.81	1.84
2018-11-13	899	F	14	1.53	0.96	0.78
2018-11-13	900	F	14	0.88	1	0.69
2018-11-30	970	F	14	4.18	0.97	1.69
2018-11-30	976	F	14	1.12	0.88	10.93
2018-11-30	978	F	14	0.87	2	1.65
2018-11-30	980	F	14	1.16	4.88	0.84
2018-12-10	1020	F	14	1.97	30	13.34
2018-11-06	866	F	10	12.12	30	30
2018-12-10	1021	F	10	1.75	2.78	4.16
2019-01-07	1151	F	10	9.37	5.15	7.28
2018-08-13	629	F	0	3.38	0.78	1.1
2018-08-13	630	F	0	1.15	0.91	0.97
2018-09-04	675	F	0	6.32	2.66	3.36
2018-09-28	734	F	0	1.34	30	3.28
2018-09-28	736	F	0	2.56	1.07	0.75
2018-09-28	738	F	0	0.87	1.32	1.5
2018-10-12	783	F	0	1.66	1.25	2.72
2018-10-30	840	F	0	2.16	2.75	4.41
2018-10-30	841	F	0	0.97	0.81	0.78
2018-11-06	867	F	0	3.34	16.13	2.28
2018-11-13	883	F	0	1.47	2.41	2.31
2018-11-13	884	F	0	1.1	2	1.15
2018-12-10	1019	F	0	12.06	6.19	1.38
2019-01-07	1148	F	0	1.15	5.06	5.97
2018-11-16	919	F	0	11.25	20.03	4.25
2018-11-16	920	F	0	1.88	1.72	1.72
2018-11-16	921	F	0	3.32	30	30
2018-11-16	923	F	0	3.56	9.44	4.25
2018-07-19	552	M	7	1.29	1.81	1.69
2018-07-19	561	M	7	1.06	30	8.65
2018-07-19	562	M	7	1.4	19.84	12.16
2018-07-23	568	M	7	1.75	2.44	3.76
2018-08-20	639	M	7	2.25	7.1	1.59
2018-08-22	646	M	7	0.9	1.1	1.21
2018-08-24	651	M	7	30	2.06	1.47
2018-08-28	656	M	7	22.5	1.72	8.12
2018-08-29	660	M	7	1.88	8.5	1.37
2018-08-30	666	M	7	1.56	3	1.19
2018-09-07	685	M	7	5.59	0.94	2.25
2018-09-07	686	M	7	30	30	1.54
2018-09-07	687	M	7	2.69	8.75	1.25
2018-09-07	688	M	7	4.34	21.84	5.09
2018-09-07	689	M	7	1.32	1.81	1.69
2018-09-19	699	M	7	2.22	1.18	11.82
2018-09-21	704	M	7	1.69	1	9.12
2018-09-28	726	M	7	11.78	1.53	3.09
2018-10-01	730	M	7	17.84	8.19	2.53
2018-10-01	731	M	7	0.93	1.35	1.21
2018-10-05	768	M	7	0.84	5.53	10.03
2018-10-05	769	M	7	1.97	21.91	30
2018-10-17	793	M	7	1.79	0.9	1.81
2018-10-17	794	M	7	3.03	1.32	2.72
2018-07-19	550	M	3	1.53	8.16	1.03
2018-07-19	551	M	3	1.22	1.16	1.28
2018-07-19	554	M	3	1.75	2.5	1.56
2018-07-19	560	M	3	14.53	2.53	10.66
2018-07-23	566	M	3	2	8.52	5.22
2018-07-23	570	M	3	4.29	1.68	1.06
2018-08-24	650	M	3	5.37	8.53	1.34
2018-08-28	658	M	3	1.03	4.97	2.25
2018-08-29	661	M	3	1.07	1.41	1.25
2018-08-29	663	M	3	2.19	30	1.38
2018-08-30	668	M	3	0.97	1.22	9.47
2018-08-30	669	M	3	8.9	4.78	1.03
2018-09-04	673	M	3	2.31	5.44	1.56
2018-09-19	700	M	3	6.38	21.84	5.22
2018-09-21	712	M	3	1.15	2.5	1.35
2018-09-25	718	M	3	1.9	1.13	1.28
2018-10-01	729	M	3	2.07	1.22	1
2018-10-05	776	M	3	1.75	1.75	17.44
2018-10-30	842	M	3	1.13	1.22	2.63
2018-07-19	553	M	11	3.1	1.41	1.81
2018-07-19	563	M	11	8.41	6	6.84
2018-07-23	567	M	11	5.69	1.47	1
2018-07-23	569	M	11	2.63	1.44	1.38
2018-07-24	589	M	11	6.78	9.68	6.84
2018-07-24	590	M	11	13.56	2.43	0.9
2018-07-24	591	M	11	5.41	30	2.03
2018-07-24	592	M	11	6.34	2.38	1.34
2018-07-24	593	M	11	16.38	12.25	30
2018-08-07	627	M	11	2	1	8
2018-08-20	635	M	11	1.03	0.84	1.91
2018-08-20	636	M	11	3.07	0.84	9.22
2018-08-20	637	M	11	1.18	11.28	0.97
2018-08-20	638	M	11	21.6	4.1	8.53
2018-08-22	642	M	11	6.43	12.75	2.94
2018-08-22	643	M	11	2.13	2.5	7.84
2018-08-22	644	M	11	6.84	1.28	1.21
2018-08-22	645	M	11	4.28	2	1.69
2018-08-24	652	M	11	4.19	4.84	6.21
2018-08-28	657	M	11	1.44	3.37	0.9
2018-08-29	662	M	11	4.96	6.28	1.03
2018-08-30	667	M	11	1.53	30	13.97
2018-09-04	674	M	11	1.62	2.12	1.25
2018-09-19	701	M	11	30	3.12	30
2018-09-21	703	M	11	1.04	6.88	11.25
2018-09-21	705	M	11	3.94	7.6	8.21
2018-09-25	716	M	11	1.1	30	1.29
2018-09-25	717	M	11	0.94	0.82	1.13
2018-10-04	756	M	11	2.81	5.59	2.72
2018-10-04	757	M	11	30	5.47	19.66
2018-10-08	773	M	11	1.35	9.91	12.72
2018-10-05	775	M	11	1.53	0.97	0.87
2018-10-05	777	M	11	12.37	2.78	1.47
2018-10-05	778	M	11	3.63	3.66	22.38
2018-10-11	781	M	11	2.64	27	3.97
2018-10-11	782	M	11	2.5	1.54	4.6
2018-10-12	784	M	11	30	1	0.75
2018-10-17	792	M	11	1.03	2.47	4.09
2018-10-23	827	M	11	3.53	18.81	7.75
2018-09-26	721	M	5	11.57	2.32	10.59
2018-11-13	902	M	5	1.31	1	1.34
2018-11-30	972	M	5	1.81	0.94	1.68
2018-11-30	981	M	5	30	2	30
2018-11-30	982	M	5	2.15	4.53	9.53
2018-09-04	680	M	1	1.13	1.22	3.25
2018-09-04	681	M	1	2	0.85	1.22
2018-09-26	720	M	1	0.97	4.56	3.47
2018-09-26	722	M	1	1.87	9.78	0.85
2018-09-26	723	M	1	1.5	2.54	1.85
2018-09-28	741	M	1	30	5.97	4.53
2018-10-03	751	M	1	1.37	1.47	1.56
2018-10-17	798	M	1	0.93	1.28	0.87
2018-10-17	799	M	1	1.03	0.84	0.78
2018-10-17	800	M	1	1.85	0.63	0.6
2018-10-17	801	M	1	0.97	1.03	0.65
2018-10-23	814	M	1	1.56	0.87	0.96
2018-11-15	879	M	1	2.28	0.63	1.59
2018-11-15	880	M	1	1.07	4	0.91
2018-11-15	881	M	1	2.54	0.91	2.09
2018-11-15	882	M	1	12.34	1.6	1.62
2018-11-13	885	M	1	0.81	0.97	0.56
2018-11-13	887	M	1	0.93	0.94	1.1
2018-11-13	903	M	1	1.78	0.69	0.94
2018-11-13	904	M	1	1.9	0.81	1
2018-11-16	915	M	1	0.97	1.12	1.31
2018-11-16	916	M	1	2.06	1.22	2.6
2018-11-16	917	M	1	1.4	2.75	1.1
2018-11-16	918	M	1	1.59	2.04	1.39
2018-11-30	973	M	1	1.1	6.72	2.59
2018-11-30	984	M	1	1.1	1.71	1
2019-01-07	1154	M	1	1.22	1.31	4.22
2018-08-13	632	M	13	0.084	1	0.81
2018-09-04	677	M	13	1.32	1.13	0.91
2018-09-04	678	M	13	1.16	1.5	1.38
2018-09-04	679	M	13	30	1.85	1.09
2018-09-04	682	M	13	0.94	0.75	1.06
2018-09-28	742	M	13	2.03	1.79	1.47
2018-09-28	745	M	13	2.09	3.13	5.28
2018-10-03	750	M	13	1.85	1	1.72
2018-10-03	752	M	13	1.03	1.66	0.32
2018-10-17	796	M	13	1.06	1.22	1.1
2018-10-17	797	M	13	1.81	1.28	0.97
2018-10-17	802	M	13	0.88	1.53	1.65
2018-10-23	812	M	13	2.37	1.57	2.44
2018-10-23	813	M	13	1.25	0.62	2.5
2018-10-23	825	M	13	1.5	0.78	1
2018-11-13	901	M	13	3.16	1.16	0.86
2018-11-13	905	M	13	2.18	1.25	2.16
2018-11-16	922	M	13	1.73	2.57	2.66
2018-11-16	927	M	13	2.47	1.44	2.78
2018-11-30	971	M	13	1.25	2.06	1.12
2018-11-30	974	M	13	1.44	2.57	1.78
2018-11-30	975	M	13	2.03	1.13	1.5
2018-11-30	983	M	13	1.28	1.57	1.81
2018-12-10	1022	M	13	1.03	1.44	0.87
2018-12-10	1023	M	13	0.82	11.16	2.03
2019-01-07	1149	M	13	2.72	1.63	1.62
2019-01-07	1153	M	13	1.84	1.1	1.18
2019-01-07	1156	M	13	1.4	1.34	4.85
2018-08-13	631	M	0	0.95	6.21	0.95
2018-09-28	739	M	0	7.38	1.97	1.31
2018-09-28	740	M	0	3.06	3.47	1.85
2018-09-28	743	M	0	1.91	2.12	17.72
2018-09-28	744	M	0	8.28	1.75	24.44
2018-09-28	746	M	0	1.03	1.57	2.41
2018-10-08	771	M	0	1.06	8.44	1.32
2018-10-12	785	M	0	0.68	0.82	0.88
2018-10-12	786	M	0	0.94	1	0.75
2018-10-12	787	M	0	2.28	1.03	0.95
2018-10-12	788	M	0	0.69	0.78	2.82
2018-10-17	803	M	0	1.46	1.09	6.37
2018-10-23	824	M	0	0.88	1.19	1.03
2018-10-23	826	M	0	5.41	0.91	0.65
2018-10-23	828	M	0	2	1.06	0.63
2018-10-30	843	M	0	2.22	2.31	0.87
2018-10-30	844	M	0	0.66	1.07	1.97
2018-10-30	845	M	0	0.53	3.75	0.84
2018-11-06	869	M	0	1.56	1.41	2.37
2018-11-06	870	M	0	1.44	9.53	1.96
2018-11-13	886	M	0	1.34	3.03	0.94
2018-11-16	928	M	0	5.15	6.72	6.41
2018-11-28	954	M	0	3.37	1.81	1.56
2019-01-07	1152	M	0	2.31	0.84	0.78
2019-01-07	1155	M	0	2.06	0.72	1.4
2018-11-16	924	M	0	3.68	0.69	0.91
2018-11-16	925	M	0	5.44	1.62	1
2018-11-16	926	M	0	30	3.41	1.31

## Sheet: ID Tag#
	1	AtmWt/Wt; Aptx+/+	M
	2	AtmWt/Wt; Aptx+/+	F
	3	AtmN/N; Aptx-/-	M
	4	AtmN/N; Aptx-/-	F
	5	AtmN/Wt; Aptx-/-	M
	6	AtmN/Wt; Aptx-/-	F
	7	AtmN/N; Aptx+/+	M
	8	AtmN/N; Aptx+/+	F
	9	AtmWt/Wt; Aptx-/-	M
	10	AtmWt/Wt; Aptx-/-	F
	11	AtmN/Wt; Aptx+/+	M
	12	AtmN/Wt; Aptx+/+	F
	13	AtmN/N; Aptx+/-	M
	14	AtmN/N; Aptx+/-	F
