# Supplementary material for: A novel, ataxic mouse model of ataxia telangiectasia caused by a clinically relevant nonsense mutation
Source: eLife. 2021 Nov 1;10:e64695. doi: 10.7554/eLife.64695 (PMC8601662; doi:10.7554/eLife.64695)
Supplement: Figure 6—source data 1. [file elife-64695-fig6-data1.xlsx]

## Sheet: Blood
CD3	AtmWt/Wt; Aptx+/+	AtmR35X/R35X; Aptx+/+	AtmR35X/R35X; Aptx-/-	AtmWt/R35X; Aptx-/-
Number of values	21	22	10	2
Mean (%)	27.7	17.8	9.273	19.15
Std. Deviation	8.855	6.279	4.553	5.445
Std. Error of Mean	1.932	1.339	1.44	3.85
95% CI of median
Actual confidence level	0.9734	0.9831	0.9785	0.5
Lower confidence limit	20.4	15.8	2.74	15.3
Upper confidence limit	35.1	21.4	14.2	23
CD4	AtmWt/Wt; Aptx+/+	AtmR35X/R35X; Aptx+/+	AtmR35X/R35X; Aptx-/-	AtmWt/R35X; Aptx-/-
Number of values	21	22	11	2
Mean (%)	66.33	57.07	50.58	64
Std. Deviation	10.74	9.689	14.73	4.667
Std. Error of Mean	2.344	2.066	4.443	3.3
95% CI of median
Actual confidence level	0.9734	0.9831	0.9883	0.5
Lower confidence limit	62.3	50.1	34.7	60.7
Upper confidence limit	72.8	62.1	69	67.3
CD8	AtmWt/Wt; Aptx+/+	AtmR35X/R35X; Aptx+/+	AtmR35X/R35X; Aptx-/-	AtmWt/R35X; Aptx-/-
Number of values	21	22	11	2
Mean (%)	25.72	32.67	39.13	30.85
Std. Deviation	9.327	8.696	9.477	1.909
Std. Error of Mean	2.035	1.854	2.857	1.35
95% CI of median
Actual confidence level	0.9734	0.9831	0.9883	0.5
Lower confidence limit	18.9	29.5	27.9	29.5
Upper confidence limit	28.9	36.9	49.1	32.2
