# Supplementary material for: A novel, ataxic mouse model of ataxia telangiectasia caused by a clinically relevant nonsense mutation
Source: eLife. 2021 Nov 1;10:e64695. doi: 10.7554/eLife.64695 (PMC8601662; doi:10.7554/eLife.64695)
Supplement: Figure 7—source data 1. [file elife-64695-fig7-data1.xlsx]

## Sheet: Thymus
CD44+CD25-	AtmWt/Wt; Aptx+/+	AtmR35X/R35X; Aptx+/+	AtmR35X/R35X; Aptx-/-	AtmWt/R35X; Aptx-/-
Number of values	11	16	9	4
Mean (%)	7.244	5.077	11.25	17.93
Std. Deviation	3.586	2.637	7.124	7.352
Std. Error of Mean	1.081	0.6592	2.375	3.676
95% CI of median
Actual confidence level	0.9883	0.9787	0.9609	0.875
Lower confidence limit	2.65	3.05	5.1	12.2
Upper confidence limit	12.3	7.05	19.2	28.5
CD44+CD25+	AtmWt/Wt; Aptx+/+	AtmR35X/R35X; Aptx+/+	AtmR35X/R35X; Aptx-/-	AtmWt/R35X; Aptx-/-
Number of values	11	16	9	4
Mean (%)	7.684	8.448	14.23	15.6
Std. Deviation	5.189	4.04	5.195	6.339
Std. Error of Mean	1.564	1.01	1.732	3.17
95% CI of median
Actual confidence level	0.9883	0.9787	0.9609	0.875
Lower confidence limit	2.93	6.18	8.39	6.41
Upper confidence limit	15	11.6	18	20.1
CD44-CD25+	AtmWt/Wt; Aptx+/+	AtmR35X/R35X; Aptx+/+	AtmR35X/R35X; Aptx-/-	AtmWt/R35X; Aptx-/-
Number of values	11	16	9	4
Mean (%)	6.896	13.1	22.65	20.48
Std. Deviation	2.45	7.374	11.99	3.214
Std. Error of Mean	0.7387	1.844	3.997	1.607
95% CI of median
Actual confidence level	0.9883	0.9787	0.9609	0.875
Lower confidence limit	4.81	4.51	12.1	17.7
Upper confidence limit	11.3	20.5	33.7	24.4
CD44-CD25-	AtmWt/Wt; Aptx+/+	AtmR35X/R35X; Aptx+/+	AtmR35X/R35X; Aptx-/-	AtmWt/R35X; Aptx-/-
Number of values	11	16	9	4
Mean (%)	34.47	28.94	15.51	15.48
Std. Deviation	7.196	6.462	7.813	5.278
Std. Error of Mean	2.17	1.615	2.604	2.639
95% CI of median
Actual confidence level	0.9883	0.9787	0.9609	0.875
Lower confidence limit	27.6	23.8	7.69	8.03
Upper confidence limit	43.8	35.1	22.8	19.9
CD4+CD8+	AtmWt/Wt; Aptx+/+	AtmR35X/R35X; Aptx+/+	AtmR35X/R35X; Aptx-/-	AtmWt/R35X; Aptx-/-
Number of values	11	16	9	4
Mean (%)	64.71	67.29	70.7	67.53
Std. Deviation	10.1	16.2	10.96	5.392
Std. Error of Mean	3.046	4.05	3.652	2.696
95% CI of median
Actual confidence level	0.9883	0.9787	0.9609	0.875
Lower confidence limit	54.8	53.4	59	62.7
Upper confidence limit	71.8	79.3	81.5	75.2
CD4+CD8-	AtmWt/Wt; Aptx+/+	AtmR35X/R35X; Aptx+/+	AtmR35X/R35X; Aptx-/-	AtmWt/R35X; Aptx-/-
Number of values	11	16	8	4
Mean (%)	13.96	6.387	4.969	15.53
Std. Deviation	3.564	3.19	1.546	2.804
Std. Error of Mean	1.075	0.7974	0.5465	1.402
95% CI of median
Actual confidence level	0.9883	0.9787	0.9922	0.875
Lower confidence limit	11.1	4.58	3.01	12
Upper confidence limit	15.9	8.82	7.58	18.2
CD4-CD8+	AtmWt/Wt; Aptx+/+	AtmR35X/R35X; Aptx+/+	AtmR35X/R35X; Aptx-/-	AtmWt/R35X; Aptx-/-
Number of values	11	16	8	4
Mean (%)	3.232	2.22	1.783	3.808
Std. Deviation	1.487	1.55	1.181	0.9282
Std. Error of Mean	0.4482	0.3876	0.4177	0.4641
95% CI of median
Actual confidence level	0.9883	0.9787	0.9922	0.875
Lower confidence limit	1.86	1.13	0.68	2.93
Upper confidence limit	4.31	2.97	4.38	4.77
CD4-CD8-	AtmWt/Wt; Aptx+/+	AtmR35X/R35X; Aptx+/+	AtmR35X/R35X; Aptx-/-	AtmWt/R35X; Aptx-/-
Number of values	11	15	9	4
Mean (%)	4.538	6.744	6.003	2.458
Std. Deviation	1.785	3.504	3.448	0.5947
Std. Error of Mean	0.5645	0.9046	1.149	0.2973
95% CI of median
Actual confidence level	0.9785	0.9648	0.9609	0.875
Lower confidence limit	3.04	4.54	3.46	1.61
Upper confidence limit	6.98	9.08	11.3	2.9
